# Supplementary material for: The Effect of Immunosuppressive Adjuvant Kynurenine on Type 1 Diabetes Vaccine
Source: Front Immunol. 2021 Jul 7;12:681328. doi: 10.3389/fimmu.2021.681328 (PMC8293994; doi:10.3389/fimmu.2021.681328)
Supplement: Supplementary Table 1 — The primers sequence used for q-PCR. [file Table_1.xlsx]

## Sheet: Sheet1
primer	sequence
Lin28a_F	CAGAAGCGAAGATCCAAAGG
Lin28a_R	CAGGCTTTCCCTGAGAACTG
IL10_F	TGCTATGCTGCCTGCTCTTA
IL10_R	ATGTTGTCCAGCTGGTCCTT
GAPDH_F	GAGGACCAGGTTGTCTCCTG
GAPDH_R	ATGTAGGCCATGAGGTCCAC
mmu-mir-329-3p_F	CGCGAACACACCCAGCTAAC
MiRNA universal _R	AGTGCAGGGTCCGAGGTATT
mmu-mir-335-3p__F	GCGCGTTTTTCATTATTGCTC
MiRNA universal _R	GTCTCGTCCTGGATTGAAGG
U6 F	cttcggcagcacatatactaa
U6 R	ggccatgctaatcttctctgtat
