# Supplementary material for: The Effect of Immunosuppressive Adjuvant Kynurenine on Type 1 Diabetes Vaccine
Source: Front Immunol. 2021 Jul 7;12:681328. doi: 10.3389/fimmu.2021.681328 (PMC8293994; doi:10.3389/fimmu.2021.681328)
Supplement: Supplementary Table 2 — Differentially expressed miRNA result. [file Table_2.xlsx]

## Sheet: Sheet 1
miRNA	chrom	start	end	strand	length	log2FoldChange	pvalue	padj	diffState	N13_count	N14_count	N15_count	N16_count	N1_count	N2_count	N3_count	N4_count	N13_normCounts	N14_normCounts	N15_normCounts	N16_normCounts	N1_normCounts	N2_normCounts	N3_normCounts	N4_normCounts
mmu-miR-329-3p	chr12	109713541	109713562	+	21	3.2454	0.0334278	0.546644	up	0	0	0	1	2	1	1	5	0	0	0	0.977618	2.63601	1.04853	1.26353	4.87936
mmu-miR-6916-5p	chr10	128512005	128512025	-	20	2.28065	0.0163357	0.367354	up	3	0	0	3	7	4	7	4	2.59976	0	0	2.93286	9.22604	4.19411	8.84474	3.90349
mmu-miR-6240	chr5	114851973	114851998	+	25	2.2708	0.00321559	0.156336	up	67	65	101	49	120	76	639	115	58.0613	54.3932	79.2953	47.9033	158.161	79.6882	807.398	112.225
mmu-miR-2137	chrX	72992113	72992133	+	20	2.22746	2.78328e-05	0.00773751	up	17	14	18	16	27	21	123	52	14.732	11.7155	14.1318	15.6419	35.5861	22.0191	155.415	50.7454
mmu-miR-6539	chr14	67859699	67859722	-	23	1.91036	0.0431551	0.638145	up	4	2	2	1	3	1	4	19	3.46634	1.67364	1.5702	0.977618	3.95402	1.04853	5.05414	18.5416
mmu-miR-1933-3p	chr11	21344600	21344621	-	21	1.74016	0.0191201	0.378169	up	3	2	7	1	3	7	14	8	2.59976	1.67364	5.49572	0.977618	3.95402	7.3397	17.6895	7.80698
mmu-miR-677-5p	chr10	128085291	128085312	+	21	1.47239	7.2434e-08	0.000100683	up	324	198	281	217	539	311	419	895	280.774	165.69	220.614	212.143	710.405	326.092	529.421	873.406
mmu-miR-143-5p	chr18	61649233	61649253	-	20	1.42507	7.56518e-05	0.0150223	up	24	23	19	7	41	45	23	38	20.7981	19.2468	14.9169	6.84333	54.0382	47.1838	29.0613	37.0831
mmu-miR-5121	chr7	45126925	45126945	-	20	1.28627	8.26567e-06	0.00382976	up	2154	1354	2033	1241	2642	2336	4756	2285	1866.63	1133.05	1596.11	1213.22	3482.17	2449.36	6009.37	2229.87
mmu-miR-214-5p	chr1	162223397	162223418	+	21	1.23531	0.0186715	0.378169	up	5	8	10	3	15	11	10	9	4.33293	6.69455	7.85102	2.93286	19.7701	11.5338	12.6353	8.78285
mmu-miR-145b	chr18	69022237	69022257	-	20	1.2317	0.00969025	0.313243	up	11	8	8	8	24	11	12	14	9.53245	6.69455	6.28082	7.82095	31.6321	11.5338	15.1624	13.6622
mmu-miR-6239	chr14	117953768	117953787	-	19	1.18365	1.16479e-06	0.000809528	up	535	540	670	456	1028	529	1090	1028	463.623	451.882	526.019	445.794	1354.91	554.672	1377.25	1003.2
mmu-miR-8105	chr10	128458732	128458753	+	21	1.18039	0.0470234	0.677229	up	6	4	3	5	6	6	10	9	5.19952	3.34727	2.35531	4.88809	7.90803	6.29117	12.6353	8.78285
mmu-miR-5126	chr1	84695890	84695911	+	21	1.09437	0.000179643	0.031213	up	38	34	55	55	78	48	81	85	32.9303	28.4518	43.1806	53.769	102.804	50.3294	102.346	82.9491
mmu-miR-138-5p	chr8;chr9	94324312;122682898	94324334;122682920	+;+	22;22	0.889354	0.000220166	0.0340034	up	191	138	252	134	203	179	229	395	165.518	115.481	197.846	131.001	267.555	187.687	289.349	385.47
mmu-miR-1a-3p	chr18;chr2	10785485;180389096	10785506;180389117	-;+	21;21	0.874497	0.0285531	0.489986	up	20	10	16	14	19	20	28	15	17.3317	8.36818	12.5616	13.6867	25.0421	20.9706	35.379	14.6381
mmu-miR-3535	chr1	86352062	86352087	-	25	0.703676	0.000992364	0.0985276	up	19975	13608	17549	10872	17029	17078	23722	16566	17310.1	11387.4	13777.8	10628.7	22444.3	17906.8	29973.6	16166.3
mmu-miR-1291	chr15	98519828	98519853	-	25	0.699431	0.00171392	0.113445	up	692	337	638	357	525	632	489	860	599.677	282.008	500.895	349.01	691.953	662.67	617.868	839.25
mmu-miR-199a-3p	chr1;chr9	162217883;21496498	162217904;21496519	+;-	21;21	0.646381	0.0117621	0.320576	up	1724	1719	1917	1355	2918	1837	1430	1479	1493.99	1438.49	1505.04	1324.67	3845.94	1926.15	1806.85	1443.31
mmu-miR-199b-3p	chr2	32318524	32318545	+	21	0.646234	0.0125019	0.326706	up	862	859	958	677	1459	918	715	739	746.997	718.827	752.128	661.848	1922.97	962.549	903.427	721.17
mmu-miR-145a-3p	chr18	61647827	61647848	-	21	0.627278	0.0245249	0.431513	up	215	247	275	222	416	242	228	193	186.316	206.694	215.903	217.031	548.29	253.744	288.086	188.343
mmu-miR-3068-3p	chr12	87437685	87437706	-	21	0.597836	0.00346353	0.156336	up	772	465	791	539	441	832	709	1012	669.004	389.121	621.016	526.936	581.24	872.376	895.846	987.583
mmu-miR-362-3p	chrX	7241984	7242005	-	21	0.593519	0.00938109	0.310469	up	481	411	345	279	321	320	416	700	416.828	343.932	270.86	272.756	423.08	335.529	525.63	683.111
mmu-miR-505-3p	chrX	60394416	60394437	-	21	0.575527	0.0420523	0.628523	up	26	26	31	21	23	26	27	42	22.5312	21.7573	24.3382	20.53	30.3141	27.2617	34.1154	40.9866
mmu-miR-429-3p	chr4	156053916	156053937	-	21	0.561053	0.00722518	0.256642	up	132	88	109	72	84	143	110	111	114.389	73.64	85.5761	70.3885	110.712	149.94	138.989	108.322
mmu-miR-29b-1-5p	chr6	31063067	31063088	-	21	0.541462	0.0217794	0.403646	up	95	66	65	46	67	97	61	75	82.3257	55.23	51.0316	44.9704	88.3064	101.707	77.0756	73.1904
mmu-miR-143-3p	chr18	61649199	61649219	-	20	0.540434	0.0110097	0.320576	up	13627	14718	15918	12349	20992	13129	12617	13783	11809	12316.3	12497.3	12072.6	27667.6	13766.1	15942	13450.4
mmu-miR-145a-5p	chr18	61647866	61647888	-	22	0.522989	0.0326125	0.539911	up	254	258	290	201	381	243	167	277	220.113	215.899	227.68	196.501	502.16	254.792	211.01	270.317
mmu-miR-34a-5p	chr4	150068473	150068494	+	21	0.512089	0.0115171	0.320576	up	137	102	97	68	90	117	92	140	118.722	85.3555	76.1549	66.478	118.62	122.678	116.245	136.622
mmu-miR-199a-5p	chr1;chr9	162217844;21496537	162217866;21496559	+;-	22;22	0.484913	0.040675	0.6213	up	272	268	284	236	392	260	182	268	235.711	224.267	222.969	230.718	516.658	272.617	229.963	261.534
mmu-miR-27a-5p	chr8	84208685	84208706	+	21	0.480969	0.00211694	0.133378	up	921	829	948	796	592	936	1036	1163	798.126	693.722	744.277	778.184	780.259	981.423	1309.02	1134.94
mmu-miR-224-5p	chrX	72261085	72261105	-	20	0.465003	0.0210423	0.400668	up	137	117	147	119	157	143	123	112	118.722	97.9078	115.41	116.337	206.927	149.94	155.415	109.298
mmu-miR-345-5p	chr12	108836989	108837010	+	21	0.463539	0.00267868	0.143286	up	226	196	193	137	173	194	166	255	195.848	164.016	151.525	133.934	228.015	203.415	209.747	248.847
mmu-miR-674-5p	chr2	117185151	117185172	+	21	0.42864	0.00994914	0.314044	up	101	102	139	87	88	106	107	136	87.5252	85.3555	109.129	85.0528	115.984	111.144	135.198	132.719
mmu-miR-500-3p	chrX	7237695	7237716	-	21	0.427757	0.025735	0.447146	up	241	182	195	120	165	173	197	209	208.847	152.301	153.095	117.314	217.471	181.395	248.916	203.957
mmu-miR-151-5p	chr15	73254855	73254875	-	20	0.400561	0.0159916	0.367354	up	569	432	477	317	402	491	328	586	493.087	361.506	374.494	309.905	529.838	514.828	414.439	571.861
mmu-miR-147-3p	chr2	122640850	122640871	+	21	0.347631	0.0447862	0.655293	up	133	110	136	115	127	105	107	135	115.256	92.05	106.774	112.426	167.387	110.096	135.198	131.743
mmu-miR-324-3p	chr11	70012095	70012114	+	19	0.347064	0.0163856	0.367354	up	308	370	364	318	306	322	354	315	266.908	309.623	285.777	310.883	403.31	337.626	447.291	307.4
mmu-miR-222-3p	chrX	19146901	19146923	-	22	0.314442	0.00112449	0.104202	up	2040	2346	2474	2109	2073	2238	1786	2342	1767.84	1963.18	1942.34	2061.8	2732.23	2346.61	2256.67	2285.49
mmu-miR-5099	chr12	36816250	36816269	+	19	0.314375	0.0324397	0.539911	up	139428	134621	172155	133614	144025	135662	133437	123121	120826	112653	135159	130624	189826	142245	168602	120150
mmu-miR-16-5p	chr14;chr3	61631936;69009918	61631957;69009939	-;+	21;21	0.310695	0.0101669	0.314044	up	101643	80764	99297	63609	67406	88494	77295	89769	88082.4	67584.8	77958.3	62185.3	88841.5	92788.5	97664.9	87603.1
mmu-miR-223-3p	chrX	96242884	96242905	+	21	0.306353	0.00285532	0.146996	up	9908	11096	11542	8397	9148	10357	7297	11600	8586.13	9285.34	9061.65	8209.06	12057.1	10859.6	9220.01	11320.1
mmu-miR-31-5p	chr4	88910614	88910635	-	21	0.297419	0.0495287	0.702499	up	164	164	151	145	140	176	116	151	142.12	137.238	118.55	141.755	184.521	184.541	146.57	147.357
mmu-miR-152-3p	chr11	96850439	96850459	+	20	0.288315	0.0104133	0.314664	up	1173	1129	1138	847	906	914	955	1170	1016.51	944.768	893.446	828.043	1194.11	958.355	1206.68	1141.77
mmu-miR-652-3p	chrX	142739060	142739080	+	20	0.273507	0.0216494	0.403646	up	5827	4693	6738	4209	4355	4925	4606	5634	5049.6	3927.19	5290.02	4114.8	5739.91	5164	5819.84	5498.06
mmu-miR-221-3p	chrX	19146307	19146329	-	22	0.263135	0.000762081	0.0882744	up	4844	4717	5444	3800	3804	4677	3887	4651	4197.74	3947.27	4274.1	3714.95	5013.69	4903.97	4911.36	4538.78
mmu-miR-217-5p	chr11	28763761	28763783	+	22	3.53049	0.163765	0.975205	maintain	0	31	2	3	0	0	233	59	0	25.9414	1.5702	2.93286	0	0	294.404	57.5765
mmu-miR-679-5p	chr12	109715587	109715608	+	21	3.49409	0.0688164	0.844079	maintain	0	0	0	0	2	2	2	0	0	0	0	0	2.63601	2.09706	2.52707	0
mmu-miR-216a-5p	chr11	28757018	28757039	+	21	3.4374	0.0625614	0.790549	maintain	0	2	0	0	0	0	11	5	0	1.67364	0	0	0	0	13.8989	4.87936
mmu-miR-684	chr2;chr4	80628714;11134156	80628732;11134174	-;+	18;18	3.3702	0.158721	0.975205	maintain	0	0	0	0	2	0	0	4	0	0	0	0	2.63601	0	0	3.90349
mmu-miR-7664-3p	chr2	25059851	25059873	+	22	3.20618	0.192201	0.975205	maintain	0	0	0	0	3	0	0	2	0	0	0	0	3.95402	0	0	1.95174
mmu-miR-7683-5p	chr1	171641879	171641900	-	21	2.98185	0.0568878	0.753087	maintain	1	0	0	0	2	1	3	1	0.866586	0	0	0	2.63601	1.04853	3.7906	0.975872
mmu-miR-449a-3p	chr13	113037589	113037610	+	21	2.88706	0.266784	0.975205	maintain	0	0	0	0	2	2	0	0	0	0	0	0	2.63601	2.09706	0	0
mmu-miR-215-3p	chr1	185313647	185313667	+	20	2.87041	0.190714	0.975205	maintain	0	0	0	0	1	2	1	0	0	0	0	0	1.31801	2.09706	1.26353	0
mmu-miR-7036b-3p	chr5	34574192	34574213	+	21	2.86432	0.19181	0.975205	maintain	0	0	0	0	2	1	0	1	0	0	0	0	2.63601	1.04853	0	0.975872
mmu-miR-7052-5p	chr7	44470352	44470372	+	20	2.75444	0.30768	0.975205	maintain	0	0	0	0	1	0	0	3	0	0	0	0	1.31801	0	0	2.92762
mmu-miR-106a-3p	chrX	52742505	52742527	-	22	2.75027	0.0784685	0.932233	maintain	0	1	1	0	0	1	6	3	0	0.836818	0.785102	0	0	1.04853	7.58121	2.92762
mmu-miR-6994-5p	chr19	11923733	11923755	+	22	2.7148	0.0903801	0.968598	maintain	0	0	1	0	1	2	2	1	0	0	0.785102	0	1.31801	2.09706	2.52707	0.975872
mmu-miR-431-3p	chr12	109590502	109590523	+	21	2.67796	0.327859	0.975205	maintain	0	0	0	0	0	1	0	3	0	0	0	0	0	1.04853	0	2.92762
mmu-miR-3092-5p	chr3	27584958	27584979	-	21	2.61514	0.451454	0.975205	maintain	0	0	0	0	3	0	0	0	0	0	0	0	3.95402	0	0	0
mmu-miR-7011-3p	chr3	88440879	88440899	-	20	2.56853	0.358141	0.975205	maintain	0	0	0	0	1	0	2	0	0	0	0	0	1.31801	0	2.52707	0
mmu-miR-802-5p	chr16	93369737	93369758	+	21	2.53324	0.166097	0.975205	maintain	0	3	0	0	0	0	7	6	0	2.51046	0	0	0	0	8.84474	5.85523
mmu-miR-7084-3p	chr9	22113951	22113972	-	21	2.51582	0.37236	0.975205	maintain	0	0	0	0	2	1	0	0	0	0	0	0	2.63601	1.04853	0	0
mmu-miR-7119-5p	chr4	126559865	126559885	+	20	2.49115	0.291921	0.975205	maintain	0	0	0	0	1	1	1	0	0	0	0	0	1.31801	1.04853	1.26353	0
mmu-miR-8095	chr16	22532128	22532149	-	21	2.49115	0.291921	0.975205	maintain	0	0	0	0	1	1	1	0	0	0	0	0	1.31801	1.04853	1.26353	0
mmu-miR-12187-5p	chr15	102328648	102328669	+	21	2.49065	0.379169	0.975205	maintain	0	0	0	0	2	0	0	1	0	0	0	0	2.63601	0	0	0.975872
mmu-miR-3092-3p	chr3	27584915	27584935	-	20	2.45538	0.389163	0.975205	maintain	0	0	0	0	0	0	2	1	0	0	0	0	0	0	2.52707	0.975872
mmu-miR-7016-5p	chr4	129684546	129684566	-	20	2.42555	0.39762	0.975205	maintain	0	0	0	0	1	2	0	0	0	0	0	0	1.31801	2.09706	0	0
mmu-miR-466l-3p	chr2	10516156	10516177	+	21	2.42482	0.183492	0.975205	maintain	0	0	1	0	0	2	2	1	0	0	0.785102	0	0	2.09706	2.52707	0.975872
mmu-miR-6948-5p	chr14	54643084	54643105	-	21	2.42054	0.0907157	0.968598	maintain	0	0	1	1	2	3	2	1	0	0	0.785102	0.977618	2.63601	3.14559	2.52707	0.975872
mmu-miR-875-5p	chr15	35661016	35661037	-	21	2.40099	0.316486	0.975205	maintain	0	0	0	0	1	1	0	1	0	0	0	0	1.31801	1.04853	0	0.975872
mmu-miR-1907	chr15	50889035	50889056	-	21	2.38476	0.321215	0.975205	maintain	0	0	0	0	0	1	1	1	0	0	0	0	0	1.04853	1.26353	0.975872
mmu-miR-6974-3p	chr17	35204475	35204496	-	21	2.38476	0.321215	0.975205	maintain	0	0	0	0	0	1	1	1	0	0	0	0	0	1.04853	1.26353	0.975872
mmu-miR-6357	chr18	70516862	70516884	+	22	2.233	0.523434	0.975205	maintain	0	0	0	0	0	0	0	3	0	0	0	0	0	0	0	2.92762
mmu-miR-6909-5p	chr10	79531064	79531085	-	21	2.233	0.523434	0.975205	maintain	0	0	0	0	0	0	0	3	0	0	0	0	0	0	0	2.92762
mmu-miR-3620-5p	chrX	150547424	150547445	-	21	2.12697	0.224102	0.975205	maintain	0	0	0	1	1	1	1	1	0	0	0	0.977618	1.31801	1.04853	1.26353	0.975872
mmu-miR-669p-3p	chr2;chr2	10489167;10496548	10489190;10496571	+;+	23;23	2.11523	0.297948	0.975205	maintain	2	0	0	0	4	0	2	0	1.73317	0	0	0	5.27202	0	2.52707	0
mmu-miR-3101-5p	chr7	27176058	27176078	-	20	2.09763	0.343858	0.975205	maintain	1	0	0	0	1	3	0	0	0.866586	0	0	0	1.31801	3.14559	0	0
mmu-miR-6936-3p	chr11	120624827	120624847	-	20	2.07243	0.281832	0.975205	maintain	0	1	0	0	0	2	1	1	0	0.836818	0	0	0	2.09706	1.26353	0.975872
mmu-miR-3102-5p.2-5p	chr7	100882367	100882387	-	20	2.05235	0.259736	0.975205	maintain	0	1	0	1	4	2	0	0	0	0.836818	0	0.977618	5.27202	2.09706	0	0
mmu-miR-7023-5p	chr4	149655540	149655562	-	22	2.04065	0.360014	0.975205	maintain	0	1	0	0	1	0	0	3	0	0.836818	0	0	1.31801	0	0	2.92762
mmu-miR-8104	chr10	122679336	122679357	+	21	2.01245	0.369533	0.975205	maintain	0	0	1	0	0	3	0	1	0	0	0.785102	0	0	3.14559	0	0.975872
mmu-miR-3070-5p	chr12;chr12	109587959;109588608	109587981;109588630	+;+	22;22	1.97477	0.574744	0.975205	maintain	0	0	0	0	0	0	2	0	0	0	0	0	0	0	2.52707	0
mmu-miR-449c-3p	chr13	113036049	113036070	+	21	1.97477	0.574744	0.975205	maintain	0	0	0	0	0	0	2	0	0	0	0	0	0	0	2.52707	0
mmu-miR-6945-5p	chr13	55507667	55507688	-	21	1.97477	0.574744	0.975205	maintain	0	0	0	0	0	0	2	0	0	0	0	0	0	0	2.52707	0
mmu-miR-465c-5p	chrX;chrX	66826004;66832566	66826025;66832587	-;-	21;21	1.97477	0.574744	0.975205	maintain	0	0	0	0	2	0	0	0	0	0	0	0	2.63601	0	0	0
mmu-miR-6919-3p	chr11	50232286	50232306	+	20	1.97477	0.574744	0.975205	maintain	0	0	0	0	2	0	0	0	0	0	0	0	2.63601	0	0	0
mmu-miR-7010-5p	chr3	82106284	82106305	-	21	1.97477	0.574744	0.975205	maintain	0	0	0	0	2	0	0	0	0	0	0	0	2.63601	0	0	0
mmu-miR-7043-5p	chr6	116646020	116646042	-	22	1.97477	0.574744	0.975205	maintain	0	0	0	0	2	0	0	0	0	0	0	0	2.63601	0	0	0
mmu-miR-7659-5p	chr10	78340186	78340207	-	21	1.97477	0.574744	0.975205	maintain	0	0	0	0	2	0	0	0	0	0	0	0	2.63601	0	0	0
mmu-miR-7665-3p	chr2	120017558	120017579	+	21	1.97477	0.574744	0.975205	maintain	0	0	0	0	2	0	0	0	0	0	0	0	2.63601	0	0	0
mmu-miR-127-5p	chr12	109592854	109592875	+	21	1.97294	0.115962	0.975205	maintain	2	0	2	0	4	1	5	1	1.73317	0	1.5702	0	5.27202	1.04853	6.31767	0.975872
mmu-miR-670-3p	chr2	94261316	94261340	-	24	1.96426	0.531714	0.975205	maintain	0	0	0	0	1	0	1	0	0	0	0	0	1.31801	0	1.26353	0
mmu-miR-6907-3p	chr10	78408477	78408499	-	22	1.96426	0.531714	0.975205	maintain	0	0	0	0	1	0	1	0	0	0	0	0	1.31801	0	1.26353	0
mmu-miR-6979-5p	chr18	37854641	37854660	-	19	1.86967	0.562419	0.975205	maintain	0	0	0	0	0	1	1	0	0	0	0	0	0	1.04853	1.26353	0
mmu-miR-7030-5p	chr5	115645578	115645599	+	21	1.86958	0.559656	0.975205	maintain	0	0	0	0	1	1	0	0	0	0	0	0	1.31801	1.04853	0	0
mmu-miR-12193-5p	chr19	6134840	6134861	-	21	1.82975	0.571052	0.975205	maintain	0	0	0	0	1	0	0	1	0	0	0	0	1.31801	0	0	0.975872
mmu-miR-7050-5p	chr7	31040292	31040312	-	20	1.82975	0.571052	0.975205	maintain	0	0	0	0	1	0	0	1	0	0	0	0	1.31801	0	0	0.975872
mmu-miR-12192-5p	chr19	3850796	3850816	-	20	1.82972	0.573792	0.975205	maintain	0	0	0	0	0	0	1	1	0	0	0	0	0	0	1.26353	0.975872
mmu-miR-7668-5p	chr7	29906509	29906532	+	23	1.82972	0.573792	0.975205	maintain	0	0	0	0	0	0	1	1	0	0	0	0	0	0	1.26353	0.975872
mmu-miR-6937-3p	chr12	28679367	28679389	+	22	1.8296	0.507574	0.975205	maintain	0	0	1	0	0	0	3	0	0	0	0.785102	0	0	0	3.7906	0
mmu-miR-1195	chr17	70860558	70860580	-	22	1.82686	0.604401	0.975205	maintain	0	0	0	0	0	2	0	0	0	0	0	0	0	2.09706	0	0
mmu-miR-130c	chr9	53400808	53400829	-	21	1.82686	0.604401	0.975205	maintain	0	0	0	0	0	2	0	0	0	0	0	0	0	2.09706	0	0
mmu-miR-6923-3p	chr11	67099855	67099875	+	20	1.82686	0.604401	0.975205	maintain	0	0	0	0	0	2	0	0	0	0	0	0	0	2.09706	0	0
mmu-miR-7020-3p	chr4	139644091	139644111	+	20	1.82686	0.604401	0.975205	maintain	0	0	0	0	0	2	0	0	0	0	0	0	0	2.09706	0	0
mmu-miR-5622-5p	chr2	152865067	152865088	+	21	1.79796	0.592704	0.975205	maintain	0	0	0	0	0	1	0	1	0	0	0	0	0	1.04853	0	0.975872
mmu-miR-26a-1-3p	chr9	119031850	119031871	+	21	1.78308	0.434865	0.975205	maintain	0	0	0	1	2	1	0	0	0	0	0	0.977618	2.63601	1.04853	0	0
mmu-miR-3113-5p	chrX	151859575	151859596	+	21	1.76721	0.616538	0.975205	maintain	0	0	0	0	0	0	0	2	0	0	0	0	0	0	0	1.95174
mmu-miR-6928-5p	chr11	101030345	101030367	+	22	1.76721	0.616538	0.975205	maintain	0	0	0	0	0	0	0	2	0	0	0	0	0	0	0	1.95174
mmu-miR-7041-5p	chr6	94606388	94606410	-	22	1.76721	0.616538	0.975205	maintain	0	0	0	0	0	0	0	2	0	0	0	0	0	0	0	1.95174
mmu-miR-762	chr7	127708534	127708555	+	21	1.76721	0.616538	0.975205	maintain	0	0	0	0	0	0	0	2	0	0	0	0	0	0	0	1.95174
mmu-miR-7235-3p	chr11	97146364	97146386	-	22	1.76045	0.444343	0.975205	maintain	1	0	0	0	2	0	0	1	0.866586	0	0	0	2.63601	0	0	0.975872
mmu-miR-7670-5p	chr6	38507325	38507346	+	21	1.73585	0.298806	0.975205	maintain	0	1	1	0	2	2	0	1	0	0.836818	0.785102	0	2.63601	2.09706	0	0.975872
mmu-miR-154-5p	chr12	109738438	109738459	+	21	1.68391	0.268721	0.975205	maintain	2	0	1	0	1	0	4	2	1.73317	0	0.785102	0	1.31801	0	5.05414	1.95174
mmu-miR-1969	chr8	70925541	70925563	+	22	1.66869	0.415989	0.975205	maintain	0	0	1	0	0	1	1	1	0	0	0.785102	0	0	1.04853	1.26353	0.975872
mmu-miR-6973a-5p	chr17	35194977	35194998	+	21	1.65623	0.47372	0.975205	maintain	0	0	0	1	1	0	0	2	0	0	0	0.977618	1.31801	0	0	1.95174
mmu-miR-3086-3p	chr19	58911686	58911707	-	21	1.64006	0.482678	0.975205	maintain	0	1	0	0	0	0	1	2	0	0.836818	0	0	0	0	1.26353	1.95174
mmu-miR-6995-3p	chr19	47273519	47273539	-	20	1.59766	0.492623	0.975205	maintain	0	0	0	1	0	2	0	1	0	0	0	0.977618	0	2.09706	0	0.975872
mmu-miR-874-5p	chr13	58023170	58023191	-	21	1.59639	0.151606	0.975205	maintain	0	1	2	2	1	6	1	4	0	0.836818	1.5702	1.95524	1.31801	6.29117	1.26353	3.90349
mmu-miR-7647-3p	chr5	123522637	123522657	-	20	1.59061	0.13179	0.975205	maintain	1	2	1	1	4	1	4	2	0.866586	1.67364	0.785102	0.977618	5.27202	1.04853	5.05414	1.95174
mmu-miR-7654-3p	chr8	8690093	8690114	-	21	1.58619	0.393652	0.975205	maintain	1	1	0	0	0	2	0	3	0.866586	0.836818	0	0	0	2.09706	0	2.92762
mmu-miR-7003-5p	chr2	163068095	163068115	+	20	1.52582	0.59539	0.975205	maintain	0	0	1	0	0	0	0	3	0	0	0.785102	0	0	0	0	2.92762
mmu-miR-7675-3p	chr12	11299924	11299944	+	20	1.44906	0.129984	0.975205	maintain	1	3	1	2	4	3	6	1	0.866586	2.51046	0.785102	1.95524	5.27202	3.14559	7.58121	0.975872
mmu-miR-344-3p	chr7;chr7	61877782;61940036	61877804;61940058	-;-	22;22	1.44138	0.124175	0.975205	maintain	4	2	2	0	6	6	2	2	3.46634	1.67364	1.5702	0	7.90803	6.29117	2.52707	1.95174
mmu-miR-6960-3p	chr15	99080844	99080865	+	21	1.43973	0.509635	0.975205	maintain	2	0	0	0	0	1	3	0	1.73317	0	0	0	0	1.04853	3.7906	0
mmu-miR-7003-3p	chr2	163068137	163068155	+	18	1.42648	0.321535	0.975205	maintain	0	1	2	0	1	3	1	1	0	0.836818	1.5702	0	1.31801	3.14559	1.26353	0.975872
mmu-miR-375-3p	chr1	74900661	74900682	-	21	1.41156	0.108511	0.975205	maintain	26	94	28	28	26	14	171	139	22.5312	78.6609	21.9829	27.3733	34.2681	14.6794	216.064	135.646
mmu-miR-802-3p	chr16	93369775	93369796	+	21	1.37846	0.522341	0.975205	maintain	0	2	0	0	0	0	2	2	0	1.67364	0	0	0	0	2.52707	1.95174
mmu-miR-6996-3p	chr2	26470059	26470081	-	22	1.36392	0.346931	0.975205	maintain	0	2	0	2	2	5	1	0	0	1.67364	0	1.95524	2.63601	5.24264	1.26353	0
mmu-miR-6976-3p	chr17	46553827	46553847	-	20	1.3604	0.475718	0.975205	maintain	0	0	0	2	0	1	2	1	0	0	0	1.95524	0	1.04853	2.52707	0.975872
mmu-miR-6921-3p	chr11	60200538	60200558	-	20	1.35987	0.435611	0.975205	maintain	2	0	0	1	2	4	0	0	1.73317	0	0	0.977618	2.63601	4.19411	0	0
mmu-miR-701-3p	chr5	111004208	111004227	+	19	1.35856	0.330604	0.975205	maintain	1	3	0	0	0	3	2	3	0.866586	2.51046	0	0	0	3.14559	2.52707	2.92762
mmu-miR-320-5p	chr14	70443525	70443546	+	21	1.33808	0.172206	0.975205	maintain	2	0	4	4	2	1	10	6	1.73317	0	3.14041	3.91047	2.63601	1.04853	12.6353	5.85523
mmu-miR-6481	chr3	99199367	99199385	-	18	1.30361	0.325874	0.975205	maintain	0	3	2	0	3	0	2	4	0	2.51046	1.5702	0	3.95402	0	2.52707	3.90349
mmu-miR-7226-3p	chr4	118210505	118210527	-	22	1.2717	0.429827	0.975205	maintain	1	0	2	0	3	1	1	0	0.866586	0	1.5702	0	3.95402	1.04853	1.26353	0
mmu-miR-7062-5p	chr7	139986846	139986869	-	23	1.24367	0.433066	0.975205	maintain	1	0	0	2	0	1	1	4	0.866586	0	0	1.95524	0	1.04853	1.26353	3.90349
mmu-miR-7032-3p	chr5	123996908	123996929	+	21	1.23728	0.677534	0.975205	maintain	0	0	1	0	0	0	2	0	0	0	0.785102	0	0	0	2.52707	0
mmu-miR-466j	chr10	60960802	60960824	+	22	1.23678	0.67626	0.975205	maintain	0	1	0	0	0	0	2	0	0	0.836818	0	0	0	0	2.52707	0
mmu-miR-8117	chr5	50252823	50252843	+	20	1.2366	0.675814	0.975205	maintain	0	0	1	0	2	0	0	0	0	0	0.785102	0	2.63601	0	0	0
mmu-miR-7067-3p	chr8	70895508	70895528	-	20	1.23612	0.674584	0.975205	maintain	0	1	0	0	2	0	0	0	0	0.836818	0	0	2.63601	0	0	0
mmu-miR-6946-5p	chr14	20690640	20690660	+	20	1.22864	0.172348	0.975205	maintain	2	2	4	0	3	3	3	5	1.73317	1.67364	3.14041	0	3.95402	3.14559	3.7906	4.87936
mmu-miR-6902-3p	chr1	93346135	93346155	+	20	1.21952	0.285628	0.975205	maintain	0	3	1	1	1	2	2	4	0	2.51046	0.785102	0.977618	1.31801	2.09706	2.52707	3.90349
mmu-miR-1231-5p	chr1	135454661	135454683	-	22	1.21473	0.623743	0.975205	maintain	0	1	0	0	1	0	1	0	0	0.836818	0	0	1.31801	0	1.26353	0
mmu-miR-377-3p	chr12	109740553	109740574	+	21	1.21334	0.620639	0.975205	maintain	0	0	0	1	1	0	1	0	0	0	0	0.977618	1.31801	0	1.26353	0
mmu-miR-468-3p	chr6	81896602	81896624	-	22	1.21334	0.620639	0.975205	maintain	0	0	0	1	1	0	1	0	0	0	0	0.977618	1.31801	0	1.26353	0
mmu-miR-7658-5p	chr4	156230096	156230115	-	19	1.18154	0.0971282	0.969042	maintain	0	4	9	4	5	6	8	10	0	3.34727	7.06592	3.91047	6.59003	6.29117	10.1083	9.75872
mmu-miR-297a-5p	chr2;chr2;chr2;chr7	10472264;10515830;10517077;10958477	10472285;10515851;10517098;10958498	+;+;+;-	21;21;21;21	1.17718	0.505831	0.975205	maintain	2	1	0	0	0	2	3	0	1.73317	0.836818	0	0	0	2.09706	3.7906	0
mmu-miR-7219-5p	chr18	68260951	68260973	-	22	1.16759	0.468208	0.975205	maintain	0	1	1	1	0	2	3	0	0	0.836818	0.785102	0.977618	0	2.09706	3.7906	0
mmu-miR-412-5p	chr12	109743303	109743325	+	22	1.16541	0.287412	0.975205	maintain	1	1	5	1	7	2	0	4	0.866586	0.836818	3.92551	0.977618	9.22604	2.09706	0	3.90349
mmu-miR-7672-5p	chr14	26669587	26669608	-	21	1.16231	0.362725	0.975205	maintain	1	1	1	1	2	1	0	4	0.866586	0.836818	0.785102	0.977618	2.63601	1.04853	0	3.90349
mmu-miR-540-3p	chr12	109586122	109586141	+	19	1.16069	0.410963	0.975205	maintain	0	4	2	1	8	0	0	3	0	3.34727	1.5702	0.977618	10.544	0	0	2.92762
mmu-miR-1966-5p	chr8	105615481	105615505	+	24	1.15369	0.613355	0.975205	maintain	0	0	1	1	3	0	0	0	0	0	0.785102	0.977618	3.95402	0	0	0
mmu-miR-7014-5p	chr3	95734947	95734968	-	21	1.14399	0.648206	0.975205	maintain	0	0	1	0	1	1	0	0	0	0	0.785102	0	1.31801	1.04853	0	0
mmu-miR-6951-5p	chr15	38490522	38490542	-	20	1.14393	0.647384	0.975205	maintain	1	0	0	0	0	1	1	0	0.866586	0	0	0	0	1.04853	1.26353	0
mmu-miR-12178-5p	chr1	164217678	164217701	+	23	1.12488	0.750243	0.975205	maintain	0	0	0	0	0	0	0	1	0	0	0	0	0	0	0	0.975872
mmu-miR-12188-3p	chr17	25160550	25160576	+	26	1.12488	0.750243	0.975205	maintain	0	0	0	0	0	0	1	0	0	0	0	0	0	0	1.26353	0
mmu-miR-12200-5p	chr5	125781683	125781704	+	21	1.12488	0.750243	0.975205	maintain	0	0	0	0	0	0	0	1	0	0	0	0	0	0	0	0.975872
mmu-miR-1251-5p	chr10	92137190	92137210	-	20	1.12488	0.750243	0.975205	maintain	0	0	0	0	0	0	0	1	0	0	0	0	0	0	0	0.975872
mmu-miR-149-3p	chr1	92850421	92850442	+	21	1.12488	0.750243	0.975205	maintain	0	0	0	0	0	0	0	1	0	0	0	0	0	0	0	0.975872
mmu-miR-154-3p	chr12	109738474	109738495	+	21	1.12488	0.750243	0.975205	maintain	0	0	0	0	0	0	0	1	0	0	0	0	0	0	0	0.975872
mmu-miR-1912-3p	chrX	147009493	147009514	+	21	1.12488	0.750243	0.975205	maintain	0	0	0	0	0	1	0	0	0	0	0	0	0	1.04853	0	0
mmu-miR-1912-5p	chrX	147009456	147009477	+	21	1.12488	0.750243	0.975205	maintain	0	0	0	0	0	0	1	0	0	0	0	0	0	0	1.26353	0
mmu-miR-1947-3p	chr16	33105411	33105432	+	21	1.12488	0.750243	0.975205	maintain	0	0	0	0	1	0	0	0	0	0	0	0	1.31801	0	0	0
mmu-miR-196b-3p	chr6	52230094	52230115	-	21	1.12488	0.750243	0.975205	maintain	0	0	0	0	1	0	0	0	0	0	0	0	1.31801	0	0	0
mmu-miR-208b-3p	chr14	54975710	54975731	-	21	1.12488	0.750243	0.975205	maintain	0	0	0	0	1	0	0	0	0	0	0	0	1.31801	0	0	0
mmu-miR-3069-5p	chr12	105031117	105031140	-	23	1.12488	0.750243	0.975205	maintain	0	0	0	0	0	0	1	0	0	0	0	0	0	0	1.26353	0
mmu-miR-3077-5p	chr14	57798424	57798448	+	24	1.12488	0.750243	0.975205	maintain	0	0	0	0	0	0	0	1	0	0	0	0	0	0	0	0.975872
mmu-miR-3104-5p	chr7	141992180	141992204	+	24	1.12488	0.750243	0.975205	maintain	0	0	0	0	0	0	0	1	0	0	0	0	0	0	0	0.975872
mmu-miR-3106-5p	chr8	16168805	16168825	-	20	1.12488	0.750243	0.975205	maintain	0	0	0	0	0	0	1	0	0	0	0	0	0	0	1.26353	0
mmu-miR-3108-5p	chr8	108936870	108936892	+	22	1.12488	0.750243	0.975205	maintain	0	0	0	0	0	0	0	1	0	0	0	0	0	0	0	0.975872
mmu-miR-3547-3p	chr17	25245551	25245571	-	20	1.12488	0.750243	0.975205	maintain	0	0	0	0	0	1	0	0	0	0	0	0	0	1.04853	0	0
mmu-miR-377-5p	chr12	109740515	109740536	+	21	1.12488	0.750243	0.975205	maintain	0	0	0	0	0	0	1	0	0	0	0	0	0	0	1.26353	0
mmu-miR-384-3p	chrX	105344292	105344313	-	21	1.12488	0.750243	0.975205	maintain	0	0	0	0	0	0	0	1	0	0	0	0	0	0	0	0.975872
mmu-miR-410-5p	chr12	109743729	109743749	+	20	1.12488	0.750243	0.975205	maintain	0	0	0	0	0	0	0	1	0	0	0	0	0	0	0	0.975872
mmu-miR-433-5p	chr12	109591729	109591750	+	21	1.12488	0.750243	0.975205	maintain	0	0	0	0	0	0	1	0	0	0	0	0	0	0	1.26353	0
mmu-miR-465d-3p	chrX	66822656	66822677	-	21	1.12488	0.750243	0.975205	maintain	0	0	0	0	0	1	0	0	0	0	0	0	0	1.04853	0	0
mmu-miR-466l-5p	chr2	10516117	10516138	+	21	1.12488	0.750243	0.975205	maintain	0	0	0	0	0	1	0	0	0	0	0	0	0	1.04853	0	0
mmu-miR-466q	chr3	28419988	28420007	+	19	1.12488	0.750243	0.975205	maintain	0	0	0	0	0	0	1	0	0	0	0	0	0	0	1.26353	0
mmu-miR-483-5p	chr7	142654968	142654989	-	21	1.12488	0.750243	0.975205	maintain	0	0	0	0	0	1	0	0	0	0	0	0	0	1.04853	0	0
mmu-miR-495-5p	chr12	109718757	109718779	+	22	1.12488	0.750243	0.975205	maintain	0	0	0	0	0	1	0	0	0	0	0	0	0	1.04853	0	0
mmu-miR-509-5p	chrX	68010149	68010170	-	21	1.12488	0.750243	0.975205	maintain	0	0	0	0	1	0	0	0	0	0	0	0	1.31801	0	0	0
mmu-miR-5104b-5p	chr1	134946278	134946299	-	21	1.12488	0.750243	0.975205	maintain	0	0	0	0	1	0	0	0	0	0	0	0	1.31801	0	0	0
mmu-miR-5106	chr4	44221197	44221219	-	22	1.12488	0.750243	0.975205	maintain	0	0	0	0	0	0	0	1	0	0	0	0	0	0	0	0.975872
mmu-miR-5118	chr16	55494770	55494788	+	18	1.12488	0.750243	0.975205	maintain	0	0	0	0	0	0	1	0	0	0	0	0	0	0	1.26353	0
mmu-miR-540-5p	chr12	109586085	109586107	+	22	1.12488	0.750243	0.975205	maintain	0	0	0	0	1	0	0	0	0	0	0	0	1.31801	0	0	0
mmu-miR-541-3p	chr12	109742466	109742487	+	21	1.12488	0.750243	0.975205	maintain	0	0	0	0	1	0	0	0	0	0	0	0	1.31801	0	0	0
mmu-miR-5619-5p	chr5	104048003	104048023	+	20	1.12488	0.750243	0.975205	maintain	0	0	0	0	0	1	0	0	0	0	0	0	0	1.04853	0	0
mmu-miR-5620-3p	chr7	7298926	7298946	+	20	1.12488	0.750243	0.975205	maintain	0	0	0	0	0	1	0	0	0	0	0	0	0	1.04853	0	0
mmu-miR-6354	chr1	169019041	169019061	-	20	1.12488	0.750243	0.975205	maintain	0	0	0	0	0	1	0	0	0	0	0	0	0	1.04853	0	0
mmu-miR-6361	chr18	32880574	32880596	-	22	1.12488	0.750243	0.975205	maintain	0	0	0	0	0	0	0	1	0	0	0	0	0	0	0	0.975872
mmu-miR-6376	chr6	88104204	88104225	-	21	1.12488	0.750243	0.975205	maintain	0	0	0	0	0	1	0	0	0	0	0	0	0	1.04853	0	0
mmu-miR-6385	chr9	58221155	58221175	+	20	1.12488	0.750243	0.975205	maintain	0	0	0	0	0	0	0	1	0	0	0	0	0	0	0	0.975872
mmu-miR-6391	chr14	118592376	118592396	-	20	1.12488	0.750243	0.975205	maintain	0	0	0	0	0	0	1	0	0	0	0	0	0	0	1.26353	0
mmu-miR-6404	chr7	143933171	143933191	+	20	1.12488	0.750243	0.975205	maintain	0	0	0	0	0	1	0	0	0	0	0	0	0	1.04853	0	0
mmu-miR-6407	chr19	53010679	53010701	-	22	1.12488	0.750243	0.975205	maintain	0	0	0	0	0	0	1	0	0	0	0	0	0	0	1.26353	0
mmu-miR-6537-5p	chr7	25097120	25097141	-	21	1.12488	0.750243	0.975205	maintain	0	0	0	0	0	0	0	1	0	0	0	0	0	0	0	0.975872
mmu-miR-6540-3p	chr16	42303386	42303406	-	20	1.12488	0.750243	0.975205	maintain	0	0	0	0	0	0	1	0	0	0	0	0	0	0	1.26353	0
mmu-miR-6540-5p	chr16	42303425	42303446	-	21	1.12488	0.750243	0.975205	maintain	0	0	0	0	0	0	0	1	0	0	0	0	0	0	0	0.975872
mmu-miR-668-3p	chr12	109734774	109734797	+	23	1.12488	0.750243	0.975205	maintain	0	0	0	0	1	0	0	0	0	0	0	0	1.31801	0	0	0
mmu-miR-6715-3p	chr19	55192714	55192734	+	20	1.12488	0.750243	0.975205	maintain	0	0	0	0	1	0	0	0	0	0	0	0	1.31801	0	0	0
mmu-miR-6715-5p	chr19	55192678	55192700	+	22	1.12488	0.750243	0.975205	maintain	0	0	0	0	0	1	0	0	0	0	0	0	0	1.04853	0	0
mmu-miR-6915-3p	chr10	128388879	128388900	+	21	1.12488	0.750243	0.975205	maintain	0	0	0	0	0	0	0	1	0	0	0	0	0	0	0	0.975872
mmu-miR-6920-5p	chr11	53409202	53409223	+	21	1.12488	0.750243	0.975205	maintain	0	0	0	0	0	1	0	0	0	0	0	0	0	1.04853	0	0
mmu-miR-6924-3p	chr11	69882032	69882052	-	20	1.12488	0.750243	0.975205	maintain	0	0	0	0	0	1	0	0	0	0	0	0	0	1.04853	0	0
mmu-miR-693-5p	chr17	46231551	46231571	+	20	1.12488	0.750243	0.975205	maintain	0	0	0	0	0	0	1	0	0	0	0	0	0	0	1.26353	0
mmu-miR-6949-5p	chr14	56082441	56082463	-	22	1.12488	0.750243	0.975205	maintain	0	0	0	0	0	0	0	1	0	0	0	0	0	0	0	0.975872
mmu-miR-6968-5p	chr17	26935472	26935493	+	21	1.12488	0.750243	0.975205	maintain	0	0	0	0	0	1	0	0	0	0	0	0	0	1.04853	0	0
mmu-miR-6978-5p	chr17	57217201	57217223	-	22	1.12488	0.750243	0.975205	maintain	0	0	0	0	0	0	1	0	0	0	0	0	0	0	1.26353	0
mmu-miR-7002-3p	chr2	114150516	114150534	-	18	1.12488	0.750243	0.975205	maintain	0	0	0	0	0	0	0	1	0	0	0	0	0	0	0	0.975872
mmu-miR-7018-3p	chr4	137538349	137538370	+	21	1.12488	0.750243	0.975205	maintain	0	0	0	0	0	0	1	0	0	0	0	0	0	0	1.26353	0
mmu-miR-7019-5p	chr4	138316173	138316195	-	22	1.12488	0.750243	0.975205	maintain	0	0	0	0	0	0	1	0	0	0	0	0	0	0	1.26353	0
mmu-miR-7034-5p	chr5	135735864	135735884	-	20	1.12488	0.750243	0.975205	maintain	0	0	0	0	0	0	0	1	0	0	0	0	0	0	0	0.975872
mmu-miR-7038-3p	chr5	140427388	140427409	+	21	1.12488	0.750243	0.975205	maintain	0	0	0	0	0	1	0	0	0	0	0	0	0	1.04853	0	0
mmu-miR-7041-3p	chr6	94606364	94606383	-	19	1.12488	0.750243	0.975205	maintain	0	0	0	0	0	1	0	0	0	0	0	0	0	1.04853	0	0
mmu-miR-7055-3p	chr7	45173339	45173361	+	22	1.12488	0.750243	0.975205	maintain	0	0	0	0	0	0	1	0	0	0	0	0	0	0	1.26353	0
mmu-miR-7070-3p	chr8	85062152	85062171	+	19	1.12488	0.750243	0.975205	maintain	0	0	0	0	1	0	0	0	0	0	0	0	1.31801	0	0	0
mmu-miR-7070-5p	chr8	85062086	85062106	+	20	1.12488	0.750243	0.975205	maintain	0	0	0	0	0	1	0	0	0	0	0	0	0	1.04853	0	0
mmu-miR-7074-5p	chr8	105951672	105951694	-	22	1.12488	0.750243	0.975205	maintain	0	0	0	0	0	0	0	1	0	0	0	0	0	0	0	0.975872
mmu-miR-7076-5p	chr8	111689649	111689669	-	20	1.12488	0.750243	0.975205	maintain	0	0	0	0	0	0	0	1	0	0	0	0	0	0	0	0.975872
mmu-miR-7077-3p	chr8	117453060	117453079	+	19	1.12488	0.750243	0.975205	maintain	0	0	0	0	0	0	1	0	0	0	0	0	0	0	1.26353	0
mmu-miR-7079-3p	chr8	123105023	123105043	+	20	1.12488	0.750243	0.975205	maintain	0	0	0	0	1	0	0	0	0	0	0	0	1.31801	0	0	0
mmu-miR-7083-5p	chr9	21809975	21809995	-	20	1.12488	0.750243	0.975205	maintain	0	0	0	0	1	0	0	0	0	0	0	0	1.31801	0	0	0
mmu-miR-713	chr13	62760807	62760825	+	18	1.12488	0.750243	0.975205	maintain	0	0	0	0	0	1	0	0	0	0	0	0	0	1.04853	0	0
mmu-miR-7210-5p	chr14	24088877	24088899	+	22	1.12488	0.750243	0.975205	maintain	0	0	0	0	0	0	1	0	0	0	0	0	0	0	1.26353	0
mmu-miR-7213-3p	chr15	79998970	79998989	-	19	1.12488	0.750243	0.975205	maintain	0	0	0	0	0	0	0	1	0	0	0	0	0	0	0	0.975872
mmu-miR-7222-5p	chr2	92594602	92594628	+	26	1.12488	0.750243	0.975205	maintain	0	0	0	0	1	0	0	0	0	0	0	0	1.31801	0	0	0
mmu-miR-7226-5p	chr4	118210539	118210564	-	25	1.12488	0.750243	0.975205	maintain	0	0	0	0	0	1	0	0	0	0	0	0	0	1.04853	0	0
mmu-miR-7231-3p	chr6	122831415	122831437	+	22	1.12488	0.750243	0.975205	maintain	0	0	0	0	0	0	1	0	0	0	0	0	0	0	1.26353	0
mmu-miR-7236-3p	chr11	121387145	121387166	-	21	1.12488	0.750243	0.975205	maintain	0	0	0	0	0	1	0	0	0	0	0	0	0	1.04853	0	0
mmu-miR-7239-5p	chr11	46170087	46170106	+	19	1.12488	0.750243	0.975205	maintain	0	0	0	0	0	0	0	1	0	0	0	0	0	0	0	0.975872
mmu-miR-7243-3p	chr9	102304924	102304943	-	19	1.12488	0.750243	0.975205	maintain	0	0	0	0	1	0	0	0	0	0	0	0	1.31801	0	0	0
mmu-miR-7663-5p	chr10	22729410	22729432	-	22	1.12488	0.750243	0.975205	maintain	0	0	0	0	0	0	0	1	0	0	0	0	0	0	0	0.975872
mmu-miR-7675-5p	chr12	11299887	11299908	+	21	1.12488	0.750243	0.975205	maintain	0	0	0	0	0	0	0	1	0	0	0	0	0	0	0	0.975872
mmu-miR-7677-5p	chr17	27091245	27091269	+	24	1.12488	0.750243	0.975205	maintain	0	0	0	0	1	0	0	0	0	0	0	0	1.31801	0	0	0
mmu-miR-7681-3p	chr1	53849474	53849495	+	21	1.12488	0.750243	0.975205	maintain	0	0	0	0	0	0	1	0	0	0	0	0	0	0	1.26353	0
mmu-miR-7686-3p	chr7	139957566	139957587	-	21	1.12488	0.750243	0.975205	maintain	0	0	0	0	0	1	0	0	0	0	0	0	0	1.04853	0	0
mmu-miR-7689-5p	chr5	36301570	36301588	+	18	1.12488	0.750243	0.975205	maintain	0	0	0	0	0	0	0	1	0	0	0	0	0	0	0	0.975872
mmu-miR-199b-5p	chr2	32318485	32318507	+	22	1.12431	0.0645382	0.808181	maintain	16	10	4	2	18	10	13	10	13.8654	8.36818	3.14041	1.95524	23.7241	10.4853	16.4259	9.75872
mmu-miR-7072-5p	chr8	94505051	94505072	+	21	1.11925	0.5398	0.975205	maintain	1	2	0	0	1	4	0	0	0.866586	1.67364	0	0	1.31801	4.19411	0	0
mmu-miR-7060-3p	chr7	127489367	127489387	+	20	1.10999	0.656934	0.975205	maintain	1	0	0	0	1	0	0	1	0.866586	0	0	0	1.31801	0	0	0.975872
mmu-miR-6908-3p	chr10	78445095	78445116	-	21	1.10993	0.659084	0.975205	maintain	0	0	1	0	1	0	0	1	0	0	0.785102	0	1.31801	0	0	0.975872
mmu-miR-7674-5p	chr2	32050946	32050969	+	23	1.1099	0.660426	0.975205	maintain	0	0	1	0	0	0	1	1	0	0	0.785102	0	0	0	1.26353	0.975872
mmu-miR-5619-3p	chr5	104048042	104048063	+	21	1.10628	0.719388	0.975205	maintain	0	0	1	0	0	2	0	0	0	0	0.785102	0	0	2.09706	0	0
mmu-miR-6389	chr7	57581070	57581090	+	20	1.10496	0.627124	0.975205	maintain	0	0	2	0	2	1	0	0	0	0	1.5702	0	2.63601	1.04853	0	0
mmu-miR-7054-5p	chr7	45012458	45012482	-	24	1.09837	0.325929	0.975205	maintain	0	2	2	1	2	2	2	2	0	1.67364	1.5702	0.977618	2.63601	2.09706	2.52707	1.95174
mmu-miR-1948-3p	chr18	12714862	12714883	+	21	1.08195	0.501576	0.975205	maintain	1	2	0	0	1	1	0	3	0.866586	1.67364	0	0	1.31801	1.04853	0	2.92762
mmu-miR-1951	chr2	115638777	115638798	+	21	1.08181	0.672202	0.975205	maintain	1	0	0	0	0	1	0	1	0.866586	0	0	0	0	1.04853	0	0.975872
mmu-miR-302a-5p	chr3	127545501	127545522	+	21	1.08181	0.672202	0.975205	maintain	1	0	0	0	0	1	0	1	0.866586	0	0	0	0	1.04853	0	0.975872
mmu-miR-12205-3p	chr9	88325743	88325764	-	21	1.07813	0.587882	0.975205	maintain	1	0	0	1	2	0	1	0	0.866586	0	0	0.977618	2.63601	0	1.26353	0
mmu-miR-6961-5p	chr15	100649205	100649224	-	19	1.0715	0.423152	0.975205	maintain	1	1	1	1	4	1	1	0	0.866586	0.836818	0.785102	0.977618	5.27202	1.04853	1.26353	0
mmu-miR-7669-5p	chr3	90011188	90011210	-	22	1.06744	0.152121	0.975205	maintain	5	8	1	1	4	8	5	7	4.33293	6.69455	0.785102	0.977618	5.27202	8.38823	6.31767	6.83111
mmu-miR-7078-3p	chr8	117459308	117459328	+	20	1.04899	0.734886	0.975205	maintain	1	0	0	0	0	0	0	2	0.866586	0	0	0	0	0	0	1.95174
mmu-miR-6993-3p	chr19	10191419	10191439	+	20	1.04875	0.737216	0.975205	maintain	0	0	1	0	0	0	0	2	0	0	0.785102	0	0	0	0	1.95174
mmu-miR-7035-5p	chr5	136105527	136105547	+	20	1.04875	0.737216	0.975205	maintain	0	0	1	0	0	0	0	2	0	0	0.785102	0	0	0	0	1.95174
mmu-miR-7079-5p	chr8	123104980	123105001	+	21	1.04875	0.737216	0.975205	maintain	0	0	1	0	0	0	0	2	0	0	0.785102	0	0	0	0	1.95174
mmu-miR-3473f	chr1	106546536	106546555	-	19	1.04248	0.446365	0.975205	maintain	0	0	4	3	1	7	3	0	0	0	3.14041	2.93286	1.31801	7.3397	3.7906	0
mmu-miR-326-5p	chr7	99552288	99552311	+	23	1.03837	0.604465	0.975205	maintain	0	2	0	0	1	1	1	0	0	1.67364	0	0	1.31801	1.04853	1.26353	0
mmu-miR-491-3p	chr4	88122091	88122112	+	21	1.01931	0.610608	0.975205	maintain	1	1	0	0	2	0	0	1	0.866586	0.836818	0	0	2.63601	0	0	0.975872
mmu-miR-3087-5p	chr2	25442780	25442800	+	20	1.01719	0.610529	0.975205	maintain	0	1	0	1	2	0	0	1	0	0.836818	0	0.977618	2.63601	0	0	0.975872
mmu-miR-8102	chr11	97744974	97744995	+	21	1.0119	0.426717	0.975205	maintain	0	1	2	1	2	2	1	1	0	0.836818	1.5702	0.977618	2.63601	2.09706	1.26353	0.975872
mmu-miR-7024-5p	chr5	33898946	33898966	-	20	0.991494	0.334041	0.975205	maintain	1	2	2	1	1	3	3	2	0.866586	1.67364	1.5702	0.977618	1.31801	3.14559	3.7906	1.95174
mmu-miR-760-5p	chr3	122293649	122293671	-	22	0.981049	0.624705	0.975205	maintain	0	0	1	1	0	2	1	0	0	0	0.785102	0.977618	0	2.09706	1.26353	0
mmu-miR-431-5p	chr12	109590459	109590479	+	20	0.969806	0.489614	0.975205	maintain	0	1	0	3	3	1	1	1	0	0.836818	0	2.93286	3.95402	1.04853	1.26353	0.975872
mmu-miR-7061-5p	chr7	130908273	130908294	+	21	0.967353	0.478622	0.975205	maintain	1	2	1	0	0	1	2	3	0.866586	1.67364	0.785102	0	0	1.04853	2.52707	2.92762
mmu-miR-202-5p	chr7	139957732	139957752	-	20	0.959794	0.184672	0.975205	maintain	10	10	10	1	7	2	19	16	8.66586	8.36818	7.85102	0.977618	9.22604	2.09706	24.0072	15.614
mmu-miR-103-2-5p	chr2	131288066	131288088	+	22	0.929319	0.132789	0.975205	maintain	3	9	7	3	6	5	6	15	2.59976	7.53137	5.49572	2.93286	7.90803	5.24264	7.58121	14.6381
mmu-miR-301a-3p	chr11	87113054	87113076	+	22	0.923069	0.202708	0.975205	maintain	6	12	9	1	1	12	10	18	5.19952	10.0418	7.06592	0.977618	1.31801	12.5823	12.6353	17.5657
mmu-miR-760-3p	chr3	122293615	122293634	-	19	0.920218	0.0854117	0.965222	maintain	3	8	11	7	7	9	15	10	2.59976	6.69455	8.63612	6.84333	9.22604	9.43676	18.953	9.75872
mmu-miR-3097-5p	chr5	35021050	35021072	+	22	0.914039	0.377847	0.975205	maintain	1	3	2	3	1	0	6	6	0.866586	2.51046	1.5702	2.93286	1.31801	0	7.58121	5.85523
mmu-miR-1247-3p	chr12	110278058	110278078	-	20	0.908869	0.296508	0.975205	maintain	2	2	5	2	2	9	1	4	1.73317	1.67364	3.92551	1.95524	2.63601	9.43676	1.26353	3.90349
mmu-miR-6954-3p	chr15	76433253	76433273	+	20	0.895743	0.228078	0.975205	maintain	3	2	3	7	2	10	5	5	2.59976	1.67364	2.35531	6.84333	2.63601	10.4853	6.31767	4.87936
mmu-miR-6900-3p	chr1	92464483	92464503	-	20	0.884571	0.130097	0.975205	maintain	6	10	6	3	3	9	12	11	5.19952	8.36818	4.71061	2.93286	3.95402	9.43676	15.1624	10.7346
mmu-miR-3112-5p	chrX	134075330	134075350	+	20	0.8834	0.557174	0.975205	maintain	3	0	0	1	1	2	0	3	2.59976	0	0	0.977618	1.31801	2.09706	0	2.92762
mmu-miR-3101-3p	chr7	27176020	27176040	-	20	0.881664	0.662544	0.975205	maintain	0	0	1	1	0	1	0	2	0	0	0.785102	0.977618	0	1.04853	0	1.95174
mmu-miR-7013-3p	chr3	95004213	95004236	+	23	0.881664	0.662544	0.975205	maintain	0	0	1	1	0	1	0	2	0	0	0.785102	0.977618	0	1.04853	0	1.95174
mmu-miR-7063-3p	chr7	141620772	141620791	+	19	0.881664	0.662544	0.975205	maintain	0	0	1	1	0	1	0	2	0	0	0.785102	0.977618	0	1.04853	0	1.95174
mmu-miR-7654-5p	chr8	8690141	8690162	-	21	0.880541	0.443796	0.975205	maintain	2	1	3	0	1	2	4	1	1.73317	0.836818	2.35531	0	1.31801	2.09706	5.05414	0.975872
mmu-miR-7029-3p	chr5	115580984	115581005	+	21	0.869546	0.378388	0.975205	maintain	1	1	2	3	1	4	2	3	0.866586	0.836818	1.5702	2.93286	1.31801	4.19411	2.52707	2.92762
mmu-miR-883b-3p	chrX	66789900	66789921	-	21	0.866077	0.704061	0.975205	maintain	0	0	0	2	0	0	1	2	0	0	0	1.95524	0	0	1.26353	1.95174
mmu-miR-6932-5p	chr11	107637727	107637748	+	21	0.861048	0.355409	0.975205	maintain	1	0	8	4	5	3	2	8	0.866586	0	6.28082	3.91047	6.59003	3.14559	2.52707	7.80698
mmu-miR-7068-3p	chr8	72470016	72470036	-	20	0.849766	0.126613	0.975205	maintain	6	8	5	5	6	5	9	13	5.19952	6.69455	3.92551	4.88809	7.90803	5.24264	11.3718	12.6863
mmu-miR-7038-5p	chr5	140427344	140427365	+	21	0.849251	0.647951	0.975205	maintain	0	0	3	0	0	2	1	1	0	0	2.35531	0	0	2.09706	1.26353	0.975872
mmu-miR-669d-2-3p	chr2	10471696	10471717	+	21	0.84881	0.50434	0.975205	maintain	1	1	1	2	1	5	1	0	0.866586	0.836818	0.785102	1.95524	1.31801	5.24264	1.26353	0
mmu-miR-7655-5p	chr2	18057846	18057867	+	21	0.847029	0.463663	0.975205	maintain	4	0	1	1	3	2	2	1	3.46634	0	0.785102	0.977618	3.95402	2.09706	2.52707	0.975872
mmu-miR-490-3p	chr6	36421800	36421821	+	21	0.841236	0.556781	0.975205	maintain	1	1	2	0	3	1	1	0	0.866586	0.836818	1.5702	0	3.95402	1.04853	1.26353	0
mmu-miR-6955-5p	chr15	78891845	78891868	+	23	0.836798	0.412434	0.975205	maintain	0	4	3	1	1	3	2	5	0	3.34727	2.35531	0.977618	1.31801	3.14559	2.52707	4.87936
mmu-miR-3064-3p	chr11	106782695	106782716	-	21	0.833882	0.345129	0.975205	maintain	3	7	5	0	8	1	5	5	2.59976	5.85773	3.92551	0	10.544	1.04853	6.31767	4.87936
mmu-miR-582-5p	chr13	109324753	109324774	+	21	0.828641	0.151282	0.975205	maintain	6	4	8	3	6	8	7	7	5.19952	3.34727	6.28082	2.93286	7.90803	8.38823	8.84474	6.83111
mmu-miR-34a-3p	chr4	150068517	150068537	+	20	0.827457	0.692875	0.975205	maintain	0	0	0	3	2	0	2	0	0	0	0	2.93286	2.63601	0	2.52707	0
mmu-miR-7094-3p	chr12;chr12	114469408;114513636	114469428;114513656	-;-	20;20	0.817113	0.216397	0.975205	maintain	10	8	3	2	10	10	6	4	8.66586	6.69455	2.35531	1.95524	13.1801	10.4853	7.58121	3.90349
mmu-miR-410-3p	chr12	109743764	109743784	+	20	0.815207	0.569029	0.975205	maintain	1	2	1	0	1	1	3	0	0.866586	1.67364	0.785102	0	1.31801	1.04853	3.7906	0
mmu-miR-669d-3p	chr2	10468423	10468443	+	20	0.811914	0.488515	0.975205	maintain	1	1	2	2	2	5	1	0	0.866586	0.836818	1.5702	1.95524	2.63601	5.24264	1.26353	0
mmu-miR-3058-3p	chr10	95559244	95559264	-	20	0.811724	0.452461	0.975205	maintain	2	2	1	1	2	4	1	1	1.73317	1.67364	0.785102	0.977618	2.63601	4.19411	1.26353	0.975872
mmu-miR-7091-3p	chrX	74274027	74274047	-	20	0.802501	0.126064	0.975205	maintain	17	9	8	15	9	15	8	37	14.732	7.53137	6.28082	14.6643	11.862	15.7279	10.1083	36.1073
mmu-miR-8090	chr19	47755062	47755081	-	19	0.800798	0.575881	0.975205	maintain	1	0	2	1	3	0	1	1	0.866586	0	1.5702	0.977618	3.95402	0	1.26353	0.975872
mmu-miR-8098	chr14	62837797	62837817	+	20	0.796888	0.668332	0.975205	maintain	1	0	2	0	1	0	0	3	0.866586	0	1.5702	0	1.31801	0	0	2.92762
mmu-miR-107-5p	chr19	34820737	34820759	-	22	0.794735	0.229522	0.975205	maintain	3	6	4	3	4	4	6	7	2.59976	5.02091	3.14041	2.93286	5.27202	4.19411	7.58121	6.83111
mmu-miR-3081-3p	chr16	44558058	44558080	-	22	0.79265	0.607363	0.975205	maintain	2	2	0	0	1	0	3	1	1.73317	1.67364	0	0	1.31801	0	3.7906	0.975872
mmu-miR-298-3p	chr2	174267512	174267535	-	23	0.786479	0.582635	0.975205	maintain	1	0	2	1	1	0	3	1	0.866586	0	1.5702	0.977618	1.31801	0	3.7906	0.975872
mmu-miR-23a-5p	chr8	84208527	84208548	+	21	0.783574	0.111915	0.975205	maintain	7	7	12	7	5	13	14	11	6.0661	5.85773	9.42123	6.84333	6.59003	13.6309	17.6895	10.7346
mmu-miR-130a-5p	chr2	84741155	84741176	-	21	0.772495	0.354889	0.975205	maintain	2	3	3	3	2	2	7	3	1.73317	2.51046	2.35531	2.93286	2.63601	2.09706	8.84474	2.92762
mmu-miR-3091-3p	chr2	180257580	180257601	+	21	0.770304	0.514104	0.975205	maintain	0	1	1	4	3	1	1	3	0	0.836818	0.785102	3.91047	3.95402	1.04853	1.26353	2.92762
mmu-miR-196a-5p	chr11;chr15	96265187;102973365	96265208;102973386	+;+	21;21	0.769543	0.190986	0.975205	maintain	38	19	12	8	40	34	12	10	32.9303	15.8995	9.42123	7.82095	52.7202	35.65	15.1624	9.75872
mmu-miR-3967	chr2	22654321	22654340	+	19	0.767489	0.618943	0.975205	maintain	2	0	1	1	3	2	0	0	1.73317	0	0.785102	0.977618	3.95402	2.09706	0	0
mmu-miR-466n-3p	chr2	10513798	10513819	+	21	0.762103	0.266225	0.975205	maintain	6	6	3	4	10	8	3	3	5.19952	5.02091	2.35531	3.91047	13.1801	8.38823	3.7906	2.92762
mmu-miR-214-3p	chr1	162223438	162223459	+	21	0.750711	0.123366	0.975205	maintain	7	7	15	8	16	11	10	9	6.0661	5.85773	11.7765	7.82095	21.0881	11.5338	12.6353	8.78285
mmu-miR-5125	chr17	23823339	23823358	+	19	0.748318	0.494236	0.975205	maintain	4	0	1	2	2	4	2	1	3.46634	0	0.785102	1.95524	2.63601	4.19411	2.52707	0.975872
mmu-miR-7653-5p	chr11	78178827	78178848	+	21	0.732851	0.513318	0.975205	maintain	1	3	1	2	0	5	3	1	0.866586	2.51046	0.785102	1.95524	0	5.24264	3.7906	0.975872
mmu-miR-128-2-5p	chr9	112118679	112118701	-	22	0.702875	0.695231	0.975205	maintain	0	4	0	0	1	3	0	1	0	3.34727	0	0	1.31801	3.14559	0	0.975872
mmu-let-7e-3p	chr17	17830411	17830432	+	21	0.686996	0.355675	0.975205	maintain	4	3	3	6	7	4	1	8	3.46634	2.51046	2.35531	5.86571	9.22604	4.19411	1.26353	7.80698
mmu-miR-485-5p	chr12	109734910	109734931	+	21	0.684621	0.561647	0.975205	maintain	4	1	1	1	4	1	3	0	3.46634	0.836818	0.785102	0.977618	5.27202	1.04853	3.7906	0
mmu-miR-6957-5p	chr15	80646078	80646098	+	20	0.664342	0.336883	0.975205	maintain	2	3	6	9	6	8	7	3	1.73317	2.51046	4.71061	8.79857	7.90803	8.38823	8.84474	2.92762
mmu-miR-7687-3p	chr8	120538734	120538754	+	20	0.657006	0.629658	0.975205	maintain	2	3	2	0	0	2	0	7	1.73317	2.51046	1.5702	0	0	2.09706	0	6.83111
mmu-miR-1933-5p	chr11	21344640	21344663	-	23	0.65175	0.604972	0.975205	maintain	0	1	3	3	5	0	1	2	0	0.836818	2.35531	2.93286	6.59003	0	1.26353	1.95174
mmu-miR-3618-5p	chr16	18284602	18284623	-	21	0.651201	0.588648	0.975205	maintain	1	4	0	1	3	2	1	1	0.866586	3.34727	0	0.977618	3.95402	2.09706	1.26353	0.975872
mmu-miR-7649-5p	chr6	128974874	128974895	-	21	0.64962	0.331067	0.975205	maintain	6	6	2	5	7	6	2	8	5.19952	5.02091	1.5702	4.88809	9.22604	6.29117	2.52707	7.80698
mmu-miR-3061-5p	chr11	52126759	52126780	+	21	0.646983	0.199233	0.975205	maintain	8	7	13	9	13	6	7	18	6.93269	5.85773	10.2063	8.79857	17.1341	6.29117	8.84474	17.5657
mmu-miR-494-3p	chr12	109715367	109715388	+	21	0.645924	0.482689	0.975205	maintain	3	1	2	3	2	5	1	3	2.59976	0.836818	1.5702	2.93286	2.63601	5.24264	1.26353	2.92762
mmu-miR-133b-3p	chr1	20682834	20682855	+	21	0.639636	0.559168	0.975205	maintain	3	1	2	1	2	3	3	0	2.59976	0.836818	1.5702	0.977618	2.63601	3.14559	3.7906	0
mmu-miR-5627-3p	chr12	44210350	44210373	+	23	0.636534	0.665811	0.975205	maintain	1	1	1	1	0	0	1	4	0.866586	0.836818	0.785102	0.977618	0	0	1.26353	3.90349
mmu-miR-383-5p	chr8	38252178	38252199	-	21	0.625891	0.425017	0.975205	maintain	8	6	4	1	1	11	3	8	6.93269	5.02091	3.14041	0.977618	1.31801	11.5338	3.7906	7.80698
mmu-miR-6945-3p	chr13	55507627	55507647	-	20	0.616585	0.624744	0.975205	maintain	0	3	1	2	1	0	3	3	0	2.51046	0.785102	1.95524	1.31801	0	3.7906	2.92762
mmu-miR-669a-3-3p	chr2	10474496	10474518	+	22	0.611717	0.336304	0.975205	maintain	5	3	5	7	8	6	5	4	4.33293	2.51046	3.92551	6.84333	10.544	6.29117	6.31767	3.90349
mmu-miR-193b-3p	chr16	13449570	13449591	+	21	0.611067	0.150797	0.975205	maintain	10	11	13	11	16	10	9	17	8.66586	9.205	10.2063	10.7538	21.0881	10.4853	11.3718	16.5898
mmu-miR-12189-3p	chr17	80194913	80194932	-	19	0.604138	0.606456	0.975205	maintain	2	1	2	1	0	4	2	1	1.73317	0.836818	1.5702	0.977618	0	4.19411	2.52707	0.975872
mmu-miR-669l-3p	chr2	10469027	10469048	+	21	0.60263	0.668745	0.975205	maintain	1	1	1	2	1	5	0	0	0.866586	0.836818	0.785102	1.95524	1.31801	5.24264	0	0
mmu-miR-12180-3p	chr10	111185680	111185697	+	17	0.588196	0.23577	0.975205	maintain	14	9	15	10	23	7	10	13	12.1322	7.53137	11.7765	9.77618	30.3141	7.3397	12.6353	12.6863
mmu-miR-369-3p	chr12	109743466	109743486	+	20	0.587563	0.328748	0.975205	maintain	4	14	6	9	7	12	14	4	3.46634	11.7155	4.71061	8.79857	9.22604	12.5823	17.6895	3.90349
mmu-miR-135b-5p	chr1	132198103	132198125	+	22	0.586278	0.590972	0.975205	maintain	3	1	4	1	3	6	1	0	2.59976	0.836818	3.14041	0.977618	3.95402	6.29117	1.26353	0
mmu-miR-133a-3p	chr18;chr2	10782913;180398437	10782934;180398458	-;+	21;21	0.586265	0.418555	0.975205	maintain	6	2	4	4	4	6	6	2	5.19952	1.67364	3.14041	3.91047	5.27202	6.29117	7.58121	1.95174
mmu-miR-452-5p	chrX	72262271	72262292	-	21	0.583528	0.425475	0.975205	maintain	2	7	2	6	4	7	2	7	1.73317	5.85773	1.5702	5.86571	5.27202	7.3397	2.52707	6.83111
mmu-miR-6964-3p	chr16	97877233	97877252	-	19	0.574638	0.379203	0.975205	maintain	4	8	8	2	9	7	4	4	3.46634	6.69455	6.28082	1.95524	11.862	7.3397	5.05414	3.90349
mmu-miR-138-1-3p	chr9	122682936	122682957	+	21	0.569696	0.18417	0.975205	maintain	10	9	12	11	11	13	13	10	8.66586	7.53137	9.42123	10.7538	14.4981	13.6309	16.4259	9.75872
mmu-miR-3069-3p	chr12	105031078	105031099	-	21	0.564917	0.479611	0.975205	maintain	4	4	2	3	3	2	2	8	3.46634	3.34727	1.5702	2.93286	3.95402	2.09706	2.52707	7.80698
mmu-miR-1191b-5p	chr10	81416276	81416297	-	21	0.556402	0.519896	0.975205	maintain	2	2	4	2	2	2	4	3	1.73317	1.67364	3.14041	1.95524	2.63601	2.09706	5.05414	2.92762
mmu-miR-451a	chr11	78073186	78073207	+	21	0.553551	0.339434	0.975205	maintain	23080	14818	13322	11919	12260	6888	12126	42325	20000.8	12400	10459.1	11652.2	16158.7	7222.27	15321.6	41303.8
mmu-miR-6935-5p	chr11	120347387	120347408	-	21	0.553514	0.725699	0.975205	maintain	1	1	2	0	2	0	2	0	0.866586	0.836818	1.5702	0	2.63601	0	2.52707	0
mmu-miR-23b-5p	chr13	63300492	63300512	+	20	0.550955	0.251016	0.975205	maintain	7	10	12	8	5	11	14	11	6.0661	8.36818	9.42123	7.82095	6.59003	11.5338	17.6895	10.7346
mmu-miR-702-3p	chr5	136991520	136991541	+	21	0.539198	0.428122	0.975205	maintain	4	2	8	8	3	4	6	12	3.46634	1.67364	6.28082	7.82095	3.95402	4.19411	7.58121	11.7105
mmu-miR-6546-3p	chr1	171064591	171064611	-	20	0.535585	0.799047	0.975205	maintain	0	3	0	1	0	0	0	5	0	2.51046	0	0.977618	0	0	0	4.87936
mmu-miR-5136	chr19	8888709	8888728	-	19	0.533947	0.460975	0.975205	maintain	5	5	3	3	2	3	4	9	4.33293	4.18409	2.35531	2.93286	2.63601	3.14559	5.05414	8.78285
mmu-miR-495-3p	chr12	109718795	109718816	+	21	0.529432	0.478534	0.975205	maintain	5	5	3	3	4	2	8	3	4.33293	4.18409	2.35531	2.93286	5.27202	2.09706	10.1083	2.92762
mmu-miR-669a-3p	chr2;chr2;chr2;chr2;chr2;chr2;chr2;chr2;chr2;chr2;chr2	10476908;10479366;10481812;10484247;10486704;10491617;10494079;10498962;10501390;10503842;10510221	10476930;10479388;10481834;10484269;10486726;10491639;10494101;10498984;10501412;10503864;10510243	+;+;+;+;+;+;+;+;+;+;+	22;22;22;22;22;22;22;22;22;22;22	0.515389	0.14421	0.975205	maintain	66	44	55	99	99	77	55	55	57.1947	36.82	43.1806	96.7842	130.483	80.7367	69.4944	53.673
mmu-miR-669o-3p	chr2	10514355	10514377	+	22	0.515224	0.391307	0.975205	maintain	6	4	5	9	9	7	5	5	5.19952	3.34727	3.92551	8.79857	11.862	7.3397	6.31767	4.87936
mmu-miR-5119	chr11	98262638	98262656	+	18	0.512384	0.596681	0.975205	maintain	1	6	1	2	3	2	1	5	0.866586	5.02091	0.785102	1.95524	3.95402	2.09706	1.26353	4.87936
mmu-miR-6969-3p	chr17	28558441	28558460	-	19	0.510611	0.857456	0.975205	maintain	0	2	0	0	0	0	2	0	0	1.67364	0	0	0	0	2.52707	0
mmu-miR-382-5p	chr12	109733781	109733802	+	21	0.50624	0.311022	0.975205	maintain	9	13	11	5	8	7	15	10	7.79927	10.8786	8.63612	4.88809	10.544	7.3397	18.953	9.75872
mmu-miR-7689-3p	chr5	36301606	36301628	+	22	0.503735	0.833953	0.975205	maintain	1	0	1	0	2	0	0	0	0.866586	0	0.785102	0	2.63601	0	0	0
mmu-miR-694	chr18	66219276	66219294	-	18	0.503307	0.833637	0.975205	maintain	0	0	1	1	0	0	2	0	0	0	0.785102	0.977618	0	0	2.52707	0
mmu-miR-365-1-5p	chr16	13453855	13453877	+	22	0.500924	0.657874	0.975205	maintain	1	4	0	7	4	5	4	0	0.866586	3.34727	0	6.84333	5.27202	5.24264	5.05414	0
mmu-miR-1941-3p	chr15	101369401	101369421	+	20	0.50011	0.512831	0.975205	maintain	2	7	2	4	3	3	6	4	1.73317	5.85773	1.5702	3.91047	3.95402	3.14559	7.58121	3.90349
mmu-miR-147-5p	chr2	122640814	122640837	+	23	0.494118	0.211949	0.975205	maintain	13	17	18	16	12	11	24	21	11.2656	14.2259	14.1318	15.6419	15.8161	11.5338	30.3248	20.4933
mmu-miR-5625-5p	chr5	30647936	30647956	+	20	0.484162	0.79948	0.975205	maintain	0	0	2	1	2	1	0	0	0	0	1.5702	0.977618	2.63601	1.04853	0	0
mmu-miR-12184-3p	chr13	24980094	24980114	+	20	0.483296	0.81988	0.975205	maintain	1	0	1	0	1	0	1	0	0.866586	0	0.785102	0	1.31801	0	1.26353	0
mmu-miR-7084-5p	chr9	22113988	22114008	-	20	0.468444	0.435893	0.975205	maintain	5	4	11	4	5	9	5	6	4.33293	3.34727	8.63612	3.91047	6.59003	9.43676	6.31767	5.85523
mmu-let-7a-2-3p	chr9	41536777	41536797	+	20	0.466661	0.847775	0.975205	maintain	0	0	2	0	1	1	0	0	0	0	1.5702	0	1.31801	1.04853	0	0
mmu-miR-7682-3p	chr1	151442430	151442450	+	20	0.464125	0.705964	0.975205	maintain	4	3	0	1	1	2	0	6	3.46634	2.51046	0	0.977618	1.31801	2.09706	0	5.85523
mmu-miR-7670-3p	chr6	38507371	38507393	+	22	0.458385	0.591236	0.975205	maintain	9	3	0	6	5	2	6	6	7.79927	2.51046	0	5.86571	6.59003	2.09706	7.58121	5.85523
mmu-miR-135a-5p	chr10;chr9	92072141;106154140	92072163;106154162	-;+	22;22	0.45526	0.17909	0.975205	maintain	24	26	26	30	16	28	20	50	20.7981	21.7573	20.4127	29.3286	21.0881	29.3588	25.2707	48.7936
mmu-miR-8092	chr19	40894754	40894774	+	20	0.452276	0.513453	0.975205	maintain	5	4	5	4	1	8	5	5	4.33293	3.34727	3.92551	3.91047	1.31801	8.38823	6.31767	4.87936
mmu-miR-434-3p	chr12	109594565	109594586	+	21	0.450372	0.366735	0.975205	maintain	5	8	15	11	13	10	7	10	4.33293	6.69455	11.7765	10.7538	17.1341	10.4853	8.84474	9.75872
mmu-miR-99a-3p	chr16	77598977	77598997	+	20	0.447046	0.814825	0.975205	maintain	2	1	0	0	0	1	2	0	1.73317	0.836818	0	0	0	1.04853	2.52707	0
mmu-miR-6904-5p	chr1	180587206	180587227	+	21	0.446414	0.775916	0.975205	maintain	1	3	0	1	0	0	4	1	0.866586	2.51046	0	0.977618	0	0	5.05414	0.975872
mmu-miR-12205-5p	chr9	88325782	88325802	-	20	0.445114	0.814837	0.975205	maintain	1	0	0	2	2	0	1	0	0.866586	0	0	1.95524	2.63601	0	1.26353	0
mmu-miR-6924-5p	chr11	69882067	69882089	-	22	0.443811	0.816631	0.975205	maintain	0	2	1	0	1	2	0	0	0	1.67364	0.785102	0	1.31801	2.09706	0	0
mmu-miR-582-3p	chr13	109324790	109324810	+	20	0.443246	0.228532	0.975205	maintain	11	28	39	19	18	28	26	27	9.53245	23.4309	30.619	18.5747	23.7241	29.3588	32.8519	26.3485
mmu-miR-15a-3p	chr14	61632038	61632059	-	21	0.4424	0.106441	0.975205	maintain	59	70	48	36	51	37	56	74	51.1286	58.5773	37.6849	35.1943	67.2183	38.7956	70.7579	72.2145
mmu-miR-324-5p	chr11	70012060	70012082	+	22	0.442112	0.0807376	0.935211	maintain	122	68	96	73	77	72	80	145	105.723	56.9037	75.3698	71.3661	101.486	75.4941	101.083	141.501
mmu-miR-1938	chr12	40222782	40222803	-	21	0.439225	0.752145	0.975205	maintain	1	1	2	0	1	1	1	1	0.866586	0.836818	1.5702	0	1.31801	1.04853	1.26353	0.975872
mmu-miR-3971	chr11	75551480	75551501	+	21	0.436452	0.536941	0.975205	maintain	4	12	4	4	11	3	3	7	3.46634	10.0418	3.14041	3.91047	14.4981	3.14559	3.7906	6.83111
mmu-let-7g-3p	chr9	106178902	106178923	+	21	0.433412	0.260505	0.975205	maintain	20	10	18	13	15	17	16	14	17.3317	8.36818	14.1318	12.709	19.7701	17.825	20.2166	13.6622
mmu-miR-181d-3p	chr8	84178720	84178740	-	20	0.433327	0.7317	0.975205	maintain	1	1	3	3	0	0	6	2	0.866586	0.836818	2.35531	2.93286	0	0	7.58121	1.95174
mmu-miR-1950	chr19	34965402	34965423	+	21	0.419919	0.701804	0.975205	maintain	1	2	7	1	4	1	0	6	0.866586	1.67364	5.49572	0.977618	5.27202	1.04853	0	5.85523
mmu-miR-6970-5p	chr17	34845143	34845167	-	24	0.416338	0.810454	0.975205	maintain	0	1	1	1	0	0	2	1	0	0.836818	0.785102	0.977618	0	0	2.52707	0.975872
mmu-miR-125a-3p	chr17	17830855	17830876	+	21	0.416155	0.337839	0.975205	maintain	14	8	14	22	14	14	17	14	12.1322	6.69455	10.9914	21.5076	18.4521	14.6794	21.4801	13.6622
mmu-miR-6905-5p	chr10	24910669	24910691	+	22	0.41438	0.793119	0.975205	maintain	0	2	0	2	2	0	1	1	0	1.67364	0	1.95524	2.63601	0	1.26353	0.975872
mmu-miR-6984-5p	chr19	3288925	3288948	+	23	0.409763	0.847936	0.975205	maintain	0	1	1	0	1	0	0	1	0	0.836818	0.785102	0	1.31801	0	0	0.975872
mmu-miR-6925-5p	chr11	70705995	70706016	+	21	0.406596	0.848736	0.975205	maintain	1	1	0	0	0	1	1	0	0.866586	0.836818	0	0	0	1.04853	1.26353	0
mmu-miR-101c	chr9	3038680	3038698	-	18	0.405274	0.149729	0.975205	maintain	45	61	44	52	38	50	33	88	38.9964	51.0459	34.5445	50.8362	50.0842	52.4264	41.6966	85.8768
mmu-miR-686	chr14	54616746	54616767	-	21	0.404655	0.824163	0.975205	maintain	0	0	1	3	3	0	0	1	0	0	0.785102	2.93286	3.95402	0	0	0.975872
mmu-miR-380-3p	chr12	109711842	109711863	+	21	0.403549	0.900725	0.975205	maintain	0	0	0	1	1	0	0	0	0	0	0	0.977618	1.31801	0	0	0
mmu-miR-7685-5p	chr2	158243542	158243565	-	23	0.403549	0.900725	0.975205	maintain	0	0	0	1	1	0	0	0	0	0	0	0.977618	1.31801	0	0	0
mmu-miR-6915-5p	chr10	128388837	128388860	+	23	0.403549	0.901523	0.975205	maintain	0	0	0	1	0	0	1	0	0	0	0	0.977618	0	0	1.26353	0
mmu-miR-7237-5p	chr8	121978024	121978047	+	23	0.403549	0.901523	0.975205	maintain	0	0	0	1	0	0	1	0	0	0	0	0.977618	0	0	1.26353	0
mmu-miR-6934-5p	chr11	119154111	119154132	-	21	0.403549	0.902344	0.975205	maintain	1	0	0	0	1	0	0	0	0.866586	0	0	0	1.31801	0	0	0
mmu-miR-12193-3p	chr19	6134802	6134822	-	20	0.403549	0.902707	0.975205	maintain	0	1	0	0	1	0	0	0	0	0.836818	0	0	1.31801	0	0	0
mmu-miR-7231-5p	chr6	122831377	122831398	+	21	0.403549	0.902707	0.975205	maintain	0	1	0	0	1	0	0	0	0	0.836818	0	0	1.31801	0	0	0
mmu-miR-218-2-3p	chr11	35616882	35616903	+	21	0.403549	0.90309	0.975205	maintain	1	0	0	0	0	0	1	0	0.866586	0	0	0	0	0	1.26353	0
mmu-miR-6963-3p	chr15	103350455	103350477	-	22	0.403549	0.90309	0.975205	maintain	1	0	0	0	0	0	1	0	0.866586	0	0	0	0	0	1.26353	0
mmu-miR-7068-5p	chr8	72470069	72470089	-	20	0.403549	0.90309	0.975205	maintain	1	0	0	0	0	0	1	0	0.866586	0	0	0	0	0	1.26353	0
mmu-miR-188-3p	chrX	7247992	7248012	-	20	0.403548	0.903492	0.975205	maintain	0	0	1	0	1	0	0	0	0	0	0.785102	0	1.31801	0	0	0
mmu-miR-6999-3p	chr2	91944872	91944893	-	21	0.403548	0.903492	0.975205	maintain	0	0	1	0	1	0	0	0	0	0	0.785102	0	1.31801	0	0	0
mmu-miR-7050-3p	chr7	31040258	31040278	-	20	0.403548	0.903492	0.975205	maintain	0	0	1	0	1	0	0	0	0	0	0.785102	0	1.31801	0	0	0
mmu-miR-302b-3p	chr3	127545275	127545297	+	22	0.403548	0.903532	0.975205	maintain	0	1	0	0	0	0	1	0	0	0.836818	0	0	0	0	1.26353	0
mmu-miR-6942-3p	chr13	21396579	21396600	-	21	0.403548	0.903532	0.975205	maintain	0	1	0	0	0	0	1	0	0	0.836818	0	0	0	0	1.26353	0
mmu-miR-615-5p	chr15	103014926	103014947	+	21	0.403548	0.9043	0.975205	maintain	0	0	1	0	0	0	1	0	0	0	0.785102	0	0	0	1.26353	0
mmu-miR-7067-5p	chr8	70895543	70895565	-	22	0.403548	0.9043	0.975205	maintain	0	0	1	0	0	0	1	0	0	0	0.785102	0	0	0	1.26353	0
mmu-miR-12206-5p	chr9	108459094	108459114	+	20	0.403548	0.904639	0.975205	maintain	0	0	0	1	0	1	0	0	0	0	0	0.977618	0	1.04853	0	0
mmu-miR-6922-5p	chr11	60202300	60202322	-	22	0.403548	0.904639	0.975205	maintain	0	0	0	1	0	1	0	0	0	0	0	0.977618	0	1.04853	0	0
mmu-miR-6987-5p	chr19	5679050	5679071	-	21	0.403548	0.904639	0.975205	maintain	0	0	0	1	0	1	0	0	0	0	0	0.977618	0	1.04853	0	0
mmu-miR-1249-5p	chr15	84951579	84951603	-	24	0.403548	0.905754	0.975205	maintain	0	0	0	1	0	0	0	1	0	0	0	0.977618	0	0	0	0.975872
mmu-miR-7001-5p	chr2	93421980	93422002	-	22	0.403548	0.905754	0.975205	maintain	0	0	0	1	0	0	0	1	0	0	0	0.977618	0	0	0	0.975872
mmu-miR-3108-3p	chr8	108936911	108936931	+	20	0.403548	0.906356	0.975205	maintain	1	0	0	0	0	1	0	0	0.866586	0	0	0	0	1.04853	0	0
mmu-miR-5108	chr10	61774795	61774813	+	18	0.403548	0.906356	0.975205	maintain	1	0	0	0	0	1	0	0	0.866586	0	0	0	0	1.04853	0	0
mmu-miR-669c-3p	chr2	10509359	10509380	+	21	0.403548	0.906356	0.975205	maintain	1	0	0	0	0	1	0	0	0.866586	0	0	0	0	1.04853	0	0
mmu-miR-6998-5p	chr2	31612426	31612447	+	21	0.403548	0.906356	0.975205	maintain	1	0	0	0	0	1	0	0	0.866586	0	0	0	0	1.04853	0	0
mmu-miR-7009-3p	chr3	36475461	36475481	-	20	0.403548	0.906356	0.975205	maintain	1	0	0	0	0	1	0	0	0.866586	0	0	0	0	1.04853	0	0
mmu-miR-7037-5p	chr5	139767915	139767938	-	23	0.403548	0.906356	0.975205	maintain	1	0	0	0	0	1	0	0	0.866586	0	0	0	0	1.04853	0	0
mmu-miR-6410	chr10	78434803	78434824	+	21	0.403547	0.90683	0.975205	maintain	0	1	0	0	0	1	0	0	0	0.836818	0	0	0	1.04853	0	0
mmu-miR-6985-5p	chr19	4263852	4263873	-	21	0.403547	0.90683	0.975205	maintain	0	1	0	0	0	1	0	0	0	0.836818	0	0	0	1.04853	0	0
mmu-miR-1930-3p	chr10	77641274	77641295	+	21	0.403547	0.907523	0.975205	maintain	1	0	0	0	0	0	0	1	0.866586	0	0	0	0	0	0	0.975872
mmu-miR-3112-3p	chrX	134075366	134075386	+	20	0.403547	0.907667	0.975205	maintain	0	0	1	0	0	1	0	0	0	0	0.785102	0	0	1.04853	0	0
mmu-miR-6949-3p	chr14	56082401	56082421	-	20	0.403547	0.907667	0.975205	maintain	0	0	1	0	0	1	0	0	0	0	0.785102	0	0	1.04853	0	0
mmu-miR-3475-5p	chrX	140310949	140310970	+	21	0.403547	0.908011	0.975205	maintain	0	1	0	0	0	0	0	1	0	0.836818	0	0	0	0	0	0.975872
mmu-miR-7076-3p	chr8	111689601	111689621	-	20	0.403547	0.908011	0.975205	maintain	0	1	0	0	0	0	0	1	0	0.836818	0	0	0	0	0	0.975872
mmu-miR-6984-3p	chr19	3288961	3288981	+	20	0.403547	0.908874	0.975205	maintain	0	0	1	0	0	0	0	1	0	0	0.785102	0	0	0	0	0.975872
mmu-miR-6985-3p	chr19	4263818	4263838	-	20	0.403547	0.908874	0.975205	maintain	0	0	1	0	0	0	0	1	0	0	0.785102	0	0	0	0	0.975872
mmu-miR-144-3p	chr11	78073047	78073066	+	19	0.40287	0.614857	0.975205	maintain	524	408	210	360	175	121	125	1249	454.091	341.422	164.871	351.943	230.651	126.872	157.942	1218.86
mmu-miR-10b-3p	chr2	74726114	74726135	+	21	0.399893	0.51151	0.975205	maintain	4	7	6	4	4	6	5	6	3.46634	5.85773	4.71061	3.91047	5.27202	6.29117	6.31767	5.85523
mmu-miR-6968-3p	chr17	26935518	26935539	+	21	0.398992	0.738954	0.975205	maintain	2	0	1	3	2	1	2	1	1.73317	0	0.785102	2.93286	2.63601	1.04853	2.52707	0.975872
mmu-miR-29a-5p	chr6	31062711	31062732	-	21	0.397009	0.150851	0.975205	maintain	90	63	68	38	48	52	60	100	77.9927	52.7196	53.387	37.1495	63.2643	54.5235	75.8121	97.5872
mmu-miR-125b-1-3p	chr9	41581980	41582001	+	21	0.39595	0.167081	0.975205	maintain	38	31	29	37	38	29	34	33	32.9303	25.9414	22.768	36.1719	50.0842	30.4073	42.9602	32.2038
mmu-miR-195b	chr2	56785825	56785846	+	21	0.39452	0.264758	0.975205	maintain	25	27	43	15	28	29	30	19	21.6646	22.5941	33.7594	14.6643	36.9042	30.4073	37.906	18.5416
mmu-miR-493-3p	chr12	109580283	109580305	+	22	0.393956	0.870154	0.975205	maintain	2	0	0	0	1	1	0	0	1.73317	0	0	0	1.31801	1.04853	0	0
mmu-miR-6392-5p	chr15	84168285	84168307	+	22	0.393956	0.870154	0.975205	maintain	2	0	0	0	1	1	0	0	1.73317	0	0	0	1.31801	1.04853	0	0
mmu-miR-135a-1-3p	chr9	106154179	106154200	+	21	0.392407	0.777712	0.975205	maintain	1	2	0	1	1	1	1	1	0.866586	1.67364	0	0.977618	1.31801	1.04853	1.26353	0.975872
mmu-miR-1927	chr1	160295885	160295907	-	22	0.38844	0.43626	0.975205	maintain	6	13	14	9	7	7	16	11	5.19952	10.8786	10.9914	8.79857	9.22604	7.3397	20.2166	10.7346
mmu-miR-3057-3p	chr10	81271654	81271675	+	21	0.385548	0.858822	0.975205	maintain	0	1	1	0	0	1	0	1	0	0.836818	0.785102	0	0	1.04853	0	0.975872
mmu-miR-719	chr14	60228873	60228894	-	21	0.3848	0.807579	0.975205	maintain	0	1	1	2	0	2	2	0	0	0.836818	0.785102	1.95524	0	2.09706	2.52707	0
mmu-miR-1960	chr5	30170751	30170772	+	21	0.384586	0.247973	0.975205	maintain	16	23	28	16	20	19	22	20	13.8654	19.2468	21.9829	15.6419	26.3601	19.922	27.7978	19.5174
mmu-miR-300-3p	chr12	109724363	109724384	+	21	0.374704	0.450404	0.975205	maintain	6	9	11	10	9	6	11	9	5.19952	7.53137	8.63612	9.77618	11.862	6.29117	13.8989	8.78285
mmu-miR-376b-5p	chr12	109723471	109723492	+	21	0.373537	0.803124	0.975205	maintain	1	1	1	1	0	3	1	0	0.866586	0.836818	0.785102	0.977618	0	3.14559	1.26353	0
mmu-miR-376c-5p	chr12	109722733	109722754	+	21	0.373537	0.803124	0.975205	maintain	1	1	1	1	0	3	1	0	0.866586	0.836818	0.785102	0.977618	0	3.14559	1.26353	0
mmu-miR-33-3p	chr15	82198167	82198188	+	21	0.369835	0.21051	0.975205	maintain	71	55	37	53	32	58	43	86	61.5276	46.025	29.0488	51.8138	42.1762	60.8147	54.332	83.925
mmu-let-7f-2-3p	chrX	151912403	151912423	+	20	0.369256	0.112428	0.975205	maintain	274	182	158	129	131	174	174	257	237.445	152.301	124.046	126.113	172.659	182.444	219.855	250.799
mmu-miR-3094-3p	chr4	40993738	40993758	+	20	0.361966	0.688782	0.975205	maintain	2	2	5	2	1	4	1	5	1.73317	1.67364	3.92551	1.95524	1.31801	4.19411	1.26353	4.87936
mmu-miR-12199-3p	chr5	77084517	77084537	-	20	0.361036	0.883465	0.975205	maintain	0	2	0	0	0	1	0	1	0	1.67364	0	0	0	1.04853	0	0.975872
mmu-miR-485-3p	chr12	109734946	109734967	+	21	0.361036	0.883465	0.975205	maintain	0	2	0	0	0	1	0	1	0	1.67364	0	0	0	1.04853	0	0.975872
mmu-miR-500-5p	chrX	7237730	7237754	-	24	0.360448	0.636163	0.975205	maintain	8	2	3	4	1	5	5	6	6.93269	1.67364	2.35531	3.91047	1.31801	5.24264	6.31767	5.85523
mmu-miR-6902-5p	chr1	93346097	93346118	+	21	0.360101	0.865216	0.975205	maintain	1	0	0	1	1	0	0	1	0.866586	0	0	0.977618	1.31801	0	0	0.975872
mmu-miR-6948-3p	chr14	54643050	54643070	-	20	0.358495	0.738636	0.975205	maintain	3	6	0	2	3	5	0	3	2.59976	5.02091	0	1.95524	3.95402	5.24264	0	2.92762
mmu-miR-3074-1-3p	chr13	63301211	63301232	-	21	0.356613	0.430039	0.975205	maintain	12	17	15	8	13	6	12	19	10.399	14.2259	11.7765	7.82095	17.1341	6.29117	15.1624	18.5416
mmu-miR-1953	chr2	151967581	151967602	-	21	0.35611	0.582623	0.975205	maintain	6	5	10	11	9	3	3	17	5.19952	4.18409	7.85102	10.7538	11.862	3.14559	3.7906	16.5898
mmu-miR-7646-5p	chrX	135746716	135746737	+	21	0.352535	0.568084	0.975205	maintain	9	13	11	2	8	12	2	12	7.79927	10.8786	8.63612	1.95524	10.544	12.5823	2.52707	11.7105
mmu-miR-382-3p	chr12	109733819	109733840	+	21	0.351986	0.808501	0.975205	maintain	0	2	0	4	3	2	0	1	0	1.67364	0	3.91047	3.95402	2.09706	0	0.975872
mmu-miR-7676-3p	chr15;chr15	78284788;78348639	78284809;78348660	-;+	21;21	0.350885	0.541544	0.975205	maintain	10	16	4	10	8	8	16	6	8.66586	13.3891	3.14041	9.77618	10.544	8.38823	20.2166	5.85523
mmu-miR-6343	chr1	76509620	76509641	+	21	0.349197	0.420761	0.975205	maintain	14	44	27	13	27	23	25	16	12.1322	36.82	21.1978	12.709	35.5861	24.1162	31.5884	15.614
mmu-miR-12187-3p	chr15	102328689	102328709	+	20	0.348945	0.828974	0.975205	maintain	0	3	0	1	0	2	1	1	0	2.51046	0	0.977618	0	2.09706	1.26353	0.975872
mmu-miR-6965-3p	chr17	24240884	24240905	-	21	0.346037	0.832694	0.975205	maintain	0	3	0	3	2	4	0	0	0	2.51046	0	2.93286	2.63601	4.19411	0	0
mmu-miR-7094-1-5p	chr12	114469444	114469466	-	22	0.344973	0.679253	0.975205	maintain	3	3	7	2	1	4	7	2	2.59976	2.51046	5.49572	1.95524	1.31801	4.19411	8.84474	1.95174
mmu-miR-6993-5p	chr19	10191380	10191402	+	22	0.339282	0.698959	0.975205	maintain	3	2	3	4	0	4	3	5	2.59976	1.67364	2.35531	3.91047	0	4.19411	3.7906	4.87936
mmu-miR-6966-3p	chr17	25780859	25780879	+	20	0.336818	0.777174	0.975205	maintain	1	3	2	1	1	1	0	5	0.866586	2.51046	1.5702	0.977618	1.31801	1.04853	0	4.87936
mmu-miR-700-5p	chr4	135416601	135416622	-	21	0.336648	0.0690334	0.844079	maintain	94	125	115	100	101	108	109	93	81.4591	104.602	90.2868	97.7618	133.119	113.241	137.725	90.7561
mmu-miR-7687-5p	chr8	120538696	120538720	+	24	0.33604	0.778464	0.975205	maintain	1	0	2	4	1	4	1	1	0.866586	0	1.5702	3.91047	1.31801	4.19411	1.26353	0.975872
mmu-miR-449a-5p	chr13	113037549	113037570	+	21	0.331795	0.427283	0.975205	maintain	53	37	39	21	30	18	23	75	45.9291	30.9623	30.619	20.53	39.5402	18.8735	29.0613	73.1904
mmu-miR-496a-3p	chr12	109739165	109739186	+	21	0.33146	0.890655	0.975205	maintain	0	0	0	2	0	0	1	1	0	0	0	1.95524	0	0	1.26353	0.975872
mmu-miR-7024-3p	chr5	33898910	33898932	-	22	0.328655	0.911003	0.975205	maintain	0	2	0	0	0	0	0	2	0	1.67364	0	0	0	0	0	1.95174
mmu-miR-541-5p	chr12	109742422	109742446	+	24	0.326574	0.289158	0.975205	maintain	53	51	50	29	48	50	45	26	45.9291	42.6777	39.2551	28.3509	63.2643	52.4264	56.859	25.3727
mmu-miR-12201-3p	chr6	99184962	99184982	-	20	0.324711	0.77938	0.975205	maintain	1	0	7	1	3	2	2	1	0.866586	0	5.49572	0.977618	3.95402	2.09706	2.52707	0.975872
mmu-miR-188-5p	chrX	7248031	7248051	-	20	0.31946	0.474654	0.975205	maintain	16	13	15	15	7	13	9	29	13.8654	10.8786	11.7765	14.6643	9.22604	13.6309	11.3718	28.3003
mmu-miR-146b-3p	chr19	46342828	46342849	+	21	0.318716	0.284414	0.975205	maintain	32	28	44	24	29	42	24	25	27.7308	23.4309	34.5445	23.4628	38.2222	44.0382	30.3248	24.3968
mmu-miR-7023-3p	chr4	149655504	149655525	-	21	0.3184	0.858486	0.975205	maintain	2	2	0	0	0	3	0	1	1.73317	1.67364	0	0	0	3.14559	0	0.975872
mmu-miR-92b-5p	chr3	89227165	89227188	-	23	0.31748	0.628844	0.975205	maintain	4	5	8	7	2	3	8	10	3.46634	4.18409	6.28082	6.84333	2.63601	3.14559	10.1083	9.75872
mmu-miR-703	chr5	98475616	98475636	-	20	0.315881	0.194061	0.975205	maintain	66	131	123	102	102	76	90	128	57.1947	109.623	96.5676	99.7171	134.437	79.6882	113.718	124.912
mmu-miR-7652-3p	chr11	55501261	55501281	+	20	0.313548	0.723374	0.975205	maintain	2	3	4	2	4	1	3	2	1.73317	2.51046	3.14041	1.95524	5.27202	1.04853	3.7906	1.95174
mmu-miR-6516-3p	chr11	117077412	117077433	+	21	0.307263	0.566562	0.975205	maintain	9	5	8	10	8	10	7	5	7.79927	4.18409	6.28082	9.77618	10.544	10.4853	8.84474	4.87936
mmu-miR-184-3p	chr9	89802263	89802284	-	21	0.305475	0.161271	0.975205	maintain	55	59	64	36	43	48	45	64	47.6622	49.3723	50.2465	35.1943	56.6742	50.3294	56.859	62.4558
mmu-miR-1936	chr12	102684943	102684965	-	22	0.304876	0.589168	0.975205	maintain	12	4	8	11	11	11	4	7	10.399	3.34727	6.28082	10.7538	14.4981	11.5338	5.05414	6.83111
mmu-miR-125b-2-3p	chr16	77646318	77646339	+	21	0.297847	0.425218	0.975205	maintain	18	17	14	15	15	12	12	21	15.5985	14.2259	10.9914	14.6643	19.7701	12.5823	15.1624	20.4933
mmu-miR-148a-5p	chr6	51269867	51269888	-	21	0.297296	0.127014	0.975205	maintain	101	118	126	98	80	81	107	146	87.5252	98.7446	98.9229	95.8066	105.44	84.9308	135.198	142.477
mmu-miR-297b-3p	chr2	10511723	10511744	+	21	0.297258	0.919169	0.975205	maintain	2	0	0	0	0	0	0	2	1.73317	0	0	0	0	0	0	1.95174
mmu-miR-297c-3p	chr2	10509065	10509086	+	21	0.297258	0.919169	0.975205	maintain	2	0	0	0	0	0	0	2	1.73317	0	0	0	0	0	0	1.95174
mmu-miR-101b-5p	chr19	29135302	29135324	+	22	0.296956	0.589912	0.975205	maintain	11	7	8	8	10	11	2	9	9.53245	5.85773	6.28082	7.82095	13.1801	11.5338	2.52707	8.78285
mmu-miR-5132-5p	chrX	74023571	74023591	-	20	0.296613	0.301674	0.975205	maintain	28	32	24	31	25	33	21	29	24.2644	26.7782	18.8425	30.3062	32.9501	34.6014	26.5342	28.3003
mmu-miR-222-5p	chrX	19146941	19146961	-	20	0.296447	0.243018	0.975205	maintain	41	34	46	37	23	47	32	47	35.53	28.4518	36.1147	36.1719	30.3141	49.2808	40.4331	45.866
mmu-miR-193a-3p	chr11	79712009	79712030	+	21	0.295065	0.799106	0.975205	maintain	4	1	4	0	3	0	2	3	3.46634	0.836818	3.14041	0	3.95402	0	2.52707	2.92762
mmu-miR-452-3p	chrX	72262235	72262256	-	21	0.293387	0.866554	0.975205	maintain	1	1	0	1	0	2	0	1	0.866586	0.836818	0	0.977618	0	2.09706	0	0.975872
mmu-miR-450a-2-3p	chrX	53048304	53048325	-	21	0.293369	0.706693	0.975205	maintain	2	4	5	3	2	2	4	5	1.73317	3.34727	3.92551	2.93286	2.63601	2.09706	5.05414	4.87936
mmu-miR-195a-5p	chr11	70235062	70235082	+	20	0.292267	0.0885783	0.968598	maintain	229	233	279	154	217	212	190	195	198.448	194.979	219.044	150.553	286.007	222.288	240.072	190.295
mmu-miR-1945	chr16	11254381	11254402	-	21	0.291287	0.642817	0.975205	maintain	9	13	9	11	4	3	8	26	7.79927	10.8786	7.06592	10.7538	5.27202	3.14559	10.1083	25.3727
mmu-miR-8106	chr9	122273930	122273951	-	21	0.289425	0.448116	0.975205	maintain	18	12	18	15	9	14	15	21	15.5985	10.0418	14.1318	14.6643	11.862	14.6794	18.953	20.4933
mmu-miR-26a-2-3p	chr10	126995581	126995602	+	21	0.28684	0.15792	0.975205	maintain	221	163	195	118	112	162	139	239	191.516	136.401	153.095	115.359	147.617	169.862	175.631	233.233
mmu-miR-130a-3p	chr2	84741116	84741137	-	21	0.283773	0.339933	0.975205	maintain	45	24	32	30	33	29	24	35	38.9964	20.0836	25.1233	29.3286	43.4942	30.4073	30.3248	34.1555
mmu-miR-34c-5p	chr9	51103076	51103098	-	22	0.28213	0.40177	0.975205	maintain	59	79	33	29	49	38	47	47	51.1286	66.1087	25.9084	28.3509	64.5823	39.8441	59.3861	45.866
mmu-let-7k	chr5	147283257	147283275	-	18	0.281838	0.257405	0.975205	maintain	59	63	93	45	68	67	46	54	51.1286	52.7196	73.0145	43.9928	89.6244	70.2514	58.1226	52.6971
mmu-miR-3084-5p	chr19;chr19	24942276;60774370	24942297;60774391	-;-	21;21	0.281719	0.397148	0.975205	maintain	38	54	30	32	18	30	42	54	32.9303	45.1882	23.5531	31.2838	23.7241	31.4559	53.0684	52.6971
mmu-miR-466b-5p	chr2;chr2;chr2;chr2;chr2;chr2;chr2;chr2	10474228;10476640;10486436;10488898;10493811;10496279;10498694;10503574	10474249;10476661;10486457;10488919;10493832;10496300;10498715;10503595	+;+;+;+;+;+;+;+	21;21;21;21;21;21;21;21	0.281423	0.45504	0.975205	maintain	48	48	80	16	24	48	40	64	41.5961	40.1673	62.8082	15.6419	31.6321	50.3294	50.5414	62.4558
mmu-miR-5620-5p	chr7	7298891	7298913	+	22	0.281083	0.328494	0.975205	maintain	29	38	30	33	17	34	28	43	25.131	31.7991	23.5531	32.2614	22.4061	35.65	35.379	41.9625
mmu-miR-5123	chr4	40850057	40850080	-	23	0.279804	0.465205	0.975205	maintain	26	28	24	21	13	17	17	47	22.5312	23.4309	18.8425	20.53	17.1341	17.825	21.4801	45.866
mmu-miR-19a-5p	chr14	115044012	115044033	+	21	0.278169	0.679375	0.975205	maintain	11	5	9	6	4	5	2	19	9.53245	4.18409	7.06592	5.86571	5.27202	5.24264	2.52707	18.5416
mmu-miR-466e-5p	chr2	10479099	10479120	+	21	0.27801	0.659036	0.975205	maintain	6	6	10	2	3	6	5	8	5.19952	5.02091	7.85102	1.95524	3.95402	6.29117	6.31767	7.80698
mmu-miR-466o-5p	chr2	10472553	10472574	+	21	0.27801	0.659036	0.975205	maintain	6	6	10	2	3	6	5	8	5.19952	5.02091	7.85102	1.95524	3.95402	6.29117	6.31767	7.80698
mmu-miR-15a-5p	chr14	61632075	61632096	-	21	0.276897	0.109734	0.975205	maintain	928	731	751	473	504	665	595	898	804.192	611.714	589.612	462.413	664.275	697.272	751.803	876.333
mmu-miR-30a-5p	chr1	23272274	23272295	+	21	0.275444	0.103734	0.975205	maintain	9035	8416	9158	6811	6986	6206	5943	11823	7829.6	7042.66	7189.97	6658.56	9207.59	6507.17	7509.19	11537.7
mmu-miR-370-3p	chr12	109618305	109618326	+	21	0.274237	0.769661	0.975205	maintain	1	3	3	3	2	1	4	2	0.866586	2.51046	2.35531	2.93286	2.63601	1.04853	5.05414	1.95174
mmu-miR-935	chr7	3415120	3415143	+	23	0.270106	0.60998	0.975205	maintain	8	10	6	15	8	12	4	13	6.93269	8.36818	4.71061	14.6643	10.544	12.5823	5.05414	12.6863
mmu-miR-455-5p	chr4	63256867	63256888	+	21	0.26125	0.0719633	0.862319	maintain	784	701	727	582	481	602	554	938	679.403	586.61	570.769	568.974	633.961	631.214	699.998	915.368
mmu-miR-3473g	chr2	126902290	126902309	-	19	0.259692	0.794776	0.975205	maintain	5	2	2	6	5	0	7	1	4.33293	1.67364	1.5702	5.86571	6.59003	0	8.84474	0.975872
mmu-miR-701-5p	chr5	111004170	111004190	+	20	0.259018	0.65308	0.975205	maintain	13	9	12	3	5	6	6	17	11.2656	7.53137	9.42123	2.93286	6.59003	6.29117	7.58121	16.5898
mmu-miR-451b	chr11	78073219	78073239	-	20	0.246175	0.663441	0.975205	maintain	48	18	43	35	17	13	15	94	41.5961	15.0627	33.7594	34.2166	22.4061	13.6309	18.953	91.732
mmu-miR-677-3p	chr10	128085335	128085360	+	25	0.245214	0.422309	0.975205	maintain	37	34	34	36	42	36	20	28	32.0637	28.4518	26.6935	35.1943	55.3562	37.747	25.2707	27.3244
mmu-miR-106b-5p	chr5	138165787	138165807	-	20	0.24044	0.0608866	0.783633	maintain	2662	2464	2492	1706	1688	2278	1672	2782	2306.85	2061.92	1956.47	1667.82	2224.79	2388.55	2112.63	2714.88
mmu-miR-130b-3p	chr16	17124071	17124092	-	21	0.239067	0.144398	0.975205	maintain	448	326	484	299	316	432	257	389	388.231	272.803	379.989	292.308	416.49	452.964	324.728	379.614
mmu-miR-18a-5p	chr14	115043867	115043889	+	22	0.239048	0.363301	0.975205	maintain	260	226	164	117	113	170	134	285	225.312	189.121	128.757	114.381	148.935	178.25	169.314	278.124
mmu-miR-7663-3p	chr10	22729372	22729393	-	21	0.238468	0.901267	0.975205	maintain	0	0	1	2	0	1	0	2	0	0	0.785102	1.95524	0	1.04853	0	1.95174
mmu-miR-6236	chr9	110281353	110281371	+	18	0.236176	0.704402	0.975205	maintain	4	5	6	7	3	7	4	6	3.46634	4.18409	4.71061	6.84333	3.95402	7.3397	5.05414	5.85523
mmu-miR-3064-5p	chr11	106782736	106782757	-	21	0.232424	0.353923	0.975205	maintain	55	45	66	61	35	65	35	72	47.6622	37.6568	51.8167	59.6347	46.1302	68.1544	44.2237	70.2628
mmu-miR-7224-3p	chr2	67675496	67675516	+	20	0.230877	0.862361	0.975205	maintain	4	2	0	1	1	0	4	1	3.46634	1.67364	0	0.977618	1.31801	0	5.05414	0.975872
mmu-miR-598-3p	chr14	63727236	63727257	+	21	0.223825	0.498596	0.975205	maintain	22	21	26	33	25	27	16	23	19.0649	17.5732	20.4127	32.2614	32.9501	28.3103	20.2166	22.4451
mmu-miR-328-5p	chr8	105308419	105308440	-	21	0.219669	0.934445	0.975205	maintain	3	0	0	0	0	0	0	3	2.59976	0	0	0	0	0	0	2.92762
mmu-miR-350-3p	chr1	176772342	176772363	-	21	0.216255	0.241686	0.975205	maintain	977	637	749	574	504	566	624	913	846.654	533.053	588.042	561.153	664.275	593.467	788.445	890.971
mmu-miR-93-5p	chr5	138165574	138165596	-	22	0.214414	0.079382	0.935094	maintain	14163	11562	12669	8870	8336	10754	9379	13273	12273.5	9675.29	9946.46	8671.47	10986.9	11275.9	11850.7	12952.8
mmu-miR-296-3p	chr2	174267058	174267079	-	21	0.213363	0.203908	0.975205	maintain	151	202	231	142	143	144	166	177	130.854	169.037	181.359	138.822	188.475	150.988	209.747	172.729
mmu-miR-193a-5p	chr11	79711975	79711996	+	21	0.213079	0.717515	0.975205	maintain	9	9	6	8	4	15	3	7	7.79927	7.53137	4.71061	7.82095	5.27202	15.7279	3.7906	6.83111
mmu-miR-297a-3p	chr2;chr2	10515869;10517116	10515890;10517137	+;+	21;21	0.211432	0.933871	0.975205	maintain	4	0	0	0	0	0	0	4	3.46634	0	0	0	0	0	0	3.90349
mmu-miR-190b-5p	chr3	90070030	90070051	+	21	0.211367	0.169875	0.975205	maintain	224	197	241	143	131	191	158	229	194.115	164.853	189.21	139.799	172.659	200.269	199.638	223.475
mmu-miR-7030-3p	chr5	115645612	115645632	+	20	0.210953	0.720492	0.975205	maintain	5	7	10	6	5	8	2	10	4.33293	5.85773	7.85102	5.86571	6.59003	8.38823	2.52707	9.75872
mmu-miR-98-3p	chrX	151913287	151913308	+	21	0.207751	0.466741	0.975205	maintain	175	161	157	104	102	87	94	251	151.653	134.728	123.261	101.672	134.437	91.222	118.772	244.944
mmu-miR-140-3p	chr8	107551288	107551308	+	20	0.203297	0.0538393	0.735515	maintain	66394	59483	66348	49846	43662	49509	52115	65913	57536.1	49776.5	52090	48730.4	57546.8	51911.6	65849.1	64322.7
mmu-miR-1970c-5p	chr9	74966743	74966765	+	22	0.20172	0.87395	0.975205	maintain	1	3	1	1	1	1	3	0	0.866586	2.51046	0.785102	0.977618	1.31801	1.04853	3.7906	0
mmu-miR-30b-5p	chr15	68337469	68337490	-	21	0.200633	0.110212	0.975205	maintain	16543	13665	14023	10815	10070	11730	10521	15937	14335.9	11435.1	11009.5	10572.9	13272.3	12299.2	13293.6	15552.5
mmu-let-7c-1-3p	chr16	77599717	77599738	+	21	0.199283	0.863127	0.975205	maintain	2	1	1	4	4	2	0	1	1.73317	0.836818	0.785102	3.91047	5.27202	2.09706	0	0.975872
mmu-miR-100-5p	chr9	41531437	41531458	+	21	0.199012	0.0883832	0.968598	maintain	9936	11538	12566	9301	9752	10182	7439	10047	8610.4	9655.21	9865.6	9092.83	12853.2	10676.1	9399.43	9804.59
mmu-miR-351-3p	chrX	53053276	53053296	-	20	0.195256	0.787147	0.975205	maintain	4	3	4	5	3	5	3	3	3.46634	2.51046	3.14041	4.88809	3.95402	5.24264	3.7906	2.92762
mmu-miR-99a-5p	chr16	77598940	77598961	+	21	0.194667	0.0965845	0.969042	maintain	10005	11640	12695	9378	9807	10250	7484	10087	8670.19	9740.57	9966.87	9168.11	12925.7	10747.4	9456.29	9843.62
mmu-miR-3569-3p	chr7	30589416	30589437	+	21	0.192938	0.851233	0.975205	maintain	1	3	2	2	1	1	2	3	0.866586	2.51046	1.5702	1.95524	1.31801	1.04853	2.52707	2.92762
mmu-miR-322-5p	chrX	53054306	53054327	-	21	0.192622	0.432683	0.975205	maintain	381	311	329	172	146	276	223	407	330.169	260.251	258.299	168.15	192.429	289.394	281.768	397.18
mmu-miR-491-5p	chr4	88122057	88122078	+	21	0.190642	0.722513	0.975205	maintain	6	6	8	12	7	7	6	8	5.19952	5.02091	6.28082	11.7314	9.22604	7.3397	7.58121	7.80698
mmu-miR-362-5p	chrX	7242019	7242042	-	23	0.187071	0.271094	0.975205	maintain	538	391	487	406	293	346	389	562	466.223	327.196	382.345	396.913	386.176	362.791	491.515	548.44
mmu-miR-1983	chr13	21896930	21896950	-	20	0.185532	0.426772	0.975205	maintain	50	61	44	40	34	45	44	45	43.3293	51.0459	34.5445	39.1047	44.8122	47.1838	55.5955	43.9142
mmu-miR-6944-3p	chr13	55477681	55477703	-	22	0.183581	0.904063	0.975205	maintain	1	0	5	0	0	1	2	2	0.866586	0	3.92551	0	0	1.04853	2.52707	1.95174
mmu-miR-193b-5p	chr16	13449533	13449554	+	21	0.183383	0.862198	0.975205	maintain	1	5	5	1	0	4	5	1	0.866586	4.18409	3.92551	0.977618	0	4.19411	6.31767	0.975872
mmu-miR-6959-5p	chr15	89305705	89305727	-	22	0.181518	0.879749	0.975205	maintain	5	1	3	0	1	3	0	4	4.33293	0.836818	2.35531	0	1.31801	3.14559	0	3.90349
mmu-miR-378c	chr14	46954905	46954925	-	20	0.180745	0.0186675	0.378169	maintain	61279	62937	68955	50028	46573	57583	48511	54962	53103.5	52666.8	54136.7	48908.3	61383.5	60377.4	61295.3	53635.9
mmu-miR-101a-5p	chr4	101346993	101347014	-	21	0.180369	0.72943	0.975205	maintain	8	7	8	9	4	8	6	10	6.93269	5.85773	6.28082	8.79857	5.27202	8.38823	7.58121	9.75872
mmu-miR-181b-5p	chr1;chr2	137966650;38853845	137966673;38853868	+;+	23;23	0.179656	0.091982	0.968598	maintain	22312	18875	25708	17497	14761	21658	16115	19979	19335.3	15794.9	20183.4	17105.4	19455.1	22709	20361.9	19497
mmu-miR-378a-3p	chr18	61397838	61397858	-	20	0.177453	0.0225838	0.409107	maintain	64176	65888	72447	52527	48857	60242	50790	57296	55614	55136.3	56878.3	51351.4	64393.8	63165.5	64174.9	55913.6
mmu-miR-33-5p	chr15	82198127	82198147	+	20	0.175813	0.577922	0.975205	maintain	68	59	59	24	28	49	34	71	58.9278	49.3723	46.321	23.4628	36.9042	51.3779	42.9602	69.2869
mmu-miR-5104	chr10	7836441	7836464	+	23	0.174878	0.339911	0.975205	maintain	121	135	139	80	89	99	109	104	104.857	112.97	109.129	78.2095	117.302	103.804	137.725	101.491
mmu-miR-381-3p	chr12	109726870	109726891	+	21	0.172199	0.643135	0.975205	maintain	15	14	17	18	12	13	13	17	12.9988	11.7155	13.3467	17.5971	15.8161	13.6309	16.4259	16.5898
mmu-miR-99b-3p	chr17	17830232	17830253	+	21	0.168257	0.449488	0.975205	maintain	84	99	69	79	76	77	66	61	72.7932	82.845	54.1721	77.2319	100.168	80.7367	83.3933	59.5282
mmu-miR-18b-5p	chrX	52742381	52742403	-	22	0.16587	0.523131	0.975205	maintain	234	221	152	109	111	146	113	251	202.781	184.937	119.336	106.56	146.299	153.085	142.779	244.944
mmu-miR-7648-5p	chr15	90224360	90224379	+	19	0.165516	0.88407	0.975205	maintain	1	4	2	2	1	0	1	6	0.866586	3.34727	1.5702	1.95524	1.31801	0	1.26353	5.85523
mmu-miR-92a-1-5p	chr14	115044437	115044459	+	22	0.163534	0.501349	0.975205	maintain	149	117	149	101	53	113	118	161	129.121	97.9078	116.98	98.7395	69.8543	118.484	149.097	157.115
mmu-miR-1943-3p	chr15	79375236	79375256	-	20	0.163246	0.862116	0.975205	maintain	2	3	1	7	5	1	3	2	1.73317	2.51046	0.785102	6.84333	6.59003	1.04853	3.7906	1.95174
mmu-miR-190b-3p	chr3	90070067	90070089	+	22	0.162605	0.839858	0.975205	maintain	3	7	4	3	1	7	1	6	2.59976	5.85773	3.14041	2.93286	1.31801	7.3397	1.26353	5.85523
mmu-miR-200c-5p	chr6	124718365	124718386	-	21	0.161449	0.928812	0.975205	maintain	3	1	0	1	0	0	4	0	2.59976	0.836818	0	0.977618	0	0	5.05414	0
mmu-miR-669c-5p	chr2	10509319	10509340	+	21	0.160819	0.303701	0.975205	maintain	3341	4342	5457	3962	3616	4069	3306	3291	2895.26	3633.47	4284.3	3873.32	4765.91	4266.46	4177.24	3211.6
mmu-miR-16-2-3p	chr3	69009960	69009981	+	21	0.158225	0.356685	0.975205	maintain	398	279	307	269	216	246	234	377	344.901	233.472	241.026	262.979	284.689	257.938	295.667	367.904
mmu-miR-298-5p	chr2	174267553	174267575	-	22	0.157036	0.354201	0.975205	maintain	139	127	186	126	95	125	134	132	120.455	106.276	146.029	123.18	125.211	131.066	169.314	128.815
mmu-miR-3110-5p	chrX	38210453	38210473	+	20	0.156812	0.872816	0.975205	maintain	8	1	5	1	1	1	3	8	6.93269	0.836818	3.92551	0.977618	1.31801	1.04853	3.7906	7.80698
mmu-miR-3066-5p	chr12	17355404	17355425	+	21	0.156224	0.434688	0.975205	maintain	76	70	63	66	47	61	49	78	65.8605	58.5773	49.4614	64.5228	61.9463	63.9602	61.9132	76.118
mmu-miR-7671-5p	chr11	53763632	53763654	-	22	0.155103	0.908375	0.975205	maintain	0	9	1	0	1	2	4	1	0	7.53137	0.785102	0	1.31801	2.09706	5.05414	0.975872
mmu-miR-187-3p	chr18	24429110	24429131	-	21	0.154616	0.277694	0.975205	maintain	208	228	266	216	205	194	160	212	180.25	190.795	208.837	211.166	270.191	203.415	202.166	206.885
mmu-miR-1941-5p	chr15	101369364	101369387	+	23	0.152999	0.772949	0.975205	maintain	9	5	11	7	6	6	6	9	7.79927	4.18409	8.63612	6.84333	7.90803	6.29117	7.58121	8.78285
mmu-miR-1306-3p	chr16	18284248	18284268	-	20	0.151358	0.33004	0.975205	maintain	138	135	163	116	98	104	111	152	119.589	112.97	127.972	113.404	129.165	109.047	140.252	148.333
mmu-miR-125b-5p	chr16;chr9	77646279;41581940	77646300;41581961	+;+	21;21	0.147949	0.45737	0.975205	maintain	1090	1381	1344	1134	1327	1053	730	975	944.579	1155.65	1055.18	1108.62	1748.99	1104.1	922.38	951.475
mmu-miR-6979-3p	chr18	37854605	37854625	-	20	0.146907	0.67793	0.975205	maintain	14	22	26	15	15	17	16	16	12.1322	18.41	20.4127	14.6643	19.7701	17.825	20.2166	15.614
mmu-miR-5621-3p	chr11	115795866	115795886	+	20	0.145964	0.878009	0.975205	maintain	3	2	5	1	3	4	1	1	2.59976	1.67364	3.92551	0.977618	3.95402	4.19411	1.26353	0.975872
mmu-miR-6952-5p	chr15	76064862	76064883	-	21	0.144601	0.920823	0.975205	maintain	1	0	3	2	0	0	3	2	0.866586	0	2.35531	1.95524	0	0	3.7906	1.95174
mmu-miR-1258-3p	chr18	56538177	56538198	+	21	0.14372	0.822207	0.975205	maintain	15	2	12	8	12	6	7	5	12.9988	1.67364	9.42123	7.82095	15.8161	6.29117	8.84474	4.87936
mmu-miR-101b-3p	chr19	29135338	29135356	+	18	0.142142	0.36352	0.975205	maintain	25056	25819	21124	19618	14592	17953	16412	29178	21713.2	21605.8	16584.5	19178.9	19232.3	18824.2	20737.1	28474
mmu-miR-148b-5p	chr15	103285148	103285171	+	23	0.141622	0.307277	0.975205	maintain	412	384	364	350	242	314	281	445	357.033	321.338	285.777	342.166	318.957	329.238	355.053	434.263
mmu-miR-1843a-5p	chr12	80391654	80391674	-	20	0.141565	0.0182875	0.378169	maintain	8581	8499	8744	6975	5955	7250	6179	8081	7436.17	7112.12	6864.93	6818.89	7848.72	7601.83	7807.38	7886.02
mmu-miR-101a-3p	chr4	101346957	101346977	-	20	0.141452	0.36587	0.975205	maintain	24824	25535	20871	19417	14430	17787	16215	28845	21512.1	21368.2	16385.9	18982.4	19018.8	18650.2	20488.2	28149
mmu-miR-379-5p	chr12	109709065	109709085	+	20	0.138448	0.626741	0.975205	maintain	60	52	63	69	66	41	51	42	51.9952	43.5146	49.4614	67.4557	86.9884	42.9897	64.4403	40.9866
mmu-miR-503-5p	chrX	53054027	53054049	-	22	0.134212	0.324455	0.975205	maintain	577	495	678	455	319	550	422	557	500.02	414.225	532.299	444.816	420.444	576.691	533.212	543.561
mmu-miR-3569-5p	chr7	30589380	30589400	+	20	0.131298	0.923499	0.975205	maintain	1	1	4	1	0	5	0	1	0.866586	0.836818	3.14041	0.977618	0	5.24264	0	0.975872
mmu-miR-210-3p	chr7	141221407	141221428	-	21	0.130618	0.567796	0.975205	maintain	621	574	555	472	330	317	435	798	538.15	480.334	435.732	461.436	434.942	332.384	549.637	778.746
mmu-let-7b-5p	chr15	85707325	85707346	+	21	0.130111	0.253464	0.975205	maintain	304326	313200	367546	257574	215913	321658	239342	248551	263725	262092	288561	251809	284575	337268	302417	242554
mmu-miR-1839-5p	chr7	81529919	81529940	+	21	0.128623	0.0948522	0.969042	maintain	8447	8059	8478	6386	5417	7164	6099	7298	7320.05	6743.92	6656.1	6243.07	7139.64	7511.66	7706.3	7121.92
mmu-miR-3473h-5p	chr3	116667598	116667617	-	19	0.128571	0.807292	0.975205	maintain	12	8	10	13	9	3	9	15	10.399	6.69455	7.85102	12.709	11.862	3.14559	11.3718	14.6381
mmu-miR-7087-5p	chr9	45939565	45939585	-	20	0.127	0.880559	0.975205	maintain	4	2	7	2	2	4	5	1	3.46634	1.67364	5.49572	1.95524	2.63601	4.19411	6.31767	0.975872
mmu-let-7c-5p	chr15;chr16	85706616;77599672	85706637;77599693	+;+	21;21	0.126767	0.26222	0.975205	maintain	687578	703274	828380	591680	485298	722812	546470	560316	595845	588513	650363	578437	639625	757889	690484	546797
mmu-miR-7093-3p	chrX	134757711	134757731	+	20	0.126419	0.872849	0.975205	maintain	7	4	5	2	4	1	2	8	6.0661	3.34727	3.92551	1.95524	5.27202	1.04853	2.52707	7.80698
mmu-miR-21c	chr8	128278188	128278208	-	20	0.126117	0.136172	0.975205	maintain	2797	2717	2665	2280	1885	2232	1860	2731	2423.84	2273.64	2092.3	2228.97	2484.44	2340.32	2350.17	2665.11
mmu-miR-7091-5p	chrX	74274083	74274105	-	22	0.125683	0.824417	0.975205	maintain	8	6	10	4	5	7	5	6	6.93269	5.02091	7.85102	3.91047	6.59003	7.3397	6.31767	5.85523
mmu-miR-409-3p	chr12	109743204	109743225	+	21	0.125075	0.85696	0.975205	maintain	1	8	14	5	4	9	4	6	0.866586	6.69455	10.9914	4.88809	5.27202	9.43676	5.05414	5.85523
mmu-let-7a-5p	chr13;chr9	48538239;41536732	48538260;41536753	-;+	21;21	0.124037	0.273169	0.975205	maintain	675022	690724	812609	580015	474308	708869	535164	549234	584965	578011	637981	567033	625141	743269	676198	535982
mmu-miR-98-5p	chrX	151913229	151913250	+	21	0.123417	0.319607	0.975205	maintain	21649	20165	21121	14924	11973	15793	16491	20082	18760.7	16874.4	16582.1	14590	15780.5	16559.4	20836.9	19597.5
mmu-miR-450b-5p	chrX	53048044	53048065	-	21	0.122618	0.542515	0.975205	maintain	112	119	137	95	64	87	86	150	97.0576	99.5814	107.559	92.8737	84.3524	91.222	108.664	146.381
mmu-miR-181a-1-3p	chr1	137966508	137966529	+	21	0.122469	0.342612	0.975205	maintain	1242	1261	1248	832	720	1005	811	1274	1076.3	1055.23	979.808	813.378	948.964	1053.77	1024.73	1243.26
mmu-let-7e-5p	chr17	17830366	17830387	+	21	0.116118	0.395179	0.975205	maintain	2738	2719	3200	1887	1841	2530	2131	2041	2372.71	2275.31	2512.33	1844.77	2426.45	2652.78	2692.59	1991.76
mmu-miR-8097	chr15	36240113	36240134	-	21	0.115676	0.856334	0.975205	maintain	3	6	13	9	5	11	2	8	2.59976	5.02091	10.2063	8.79857	6.59003	11.5338	2.52707	7.80698
mmu-miR-17-3p	chr14	115043721	115043742	+	21	0.114549	0.401845	0.975205	maintain	333	339	335	229	223	239	219	334	288.573	283.681	263.009	223.875	293.915	250.598	276.714	325.941
mmu-miR-31-3p	chr4	88910577	88910599	-	22	0.113418	0.875499	0.975205	maintain	5	7	2	4	3	3	3	6	4.33293	5.85773	1.5702	3.91047	3.95402	3.14559	3.7906	5.85523
mmu-miR-181a-5p	chr1;chr2	137966468;38852741	137966490;38852763	+;+	22;22	0.113273	0.50064	0.975205	maintain	180791	220348	273122	176845	147990	238767	156263	148609	156671	184391	214429	172887	195052	250354	197444	145023
mmu-miR-30f	chr4	120772621	120772642	+	21	0.113268	0.901301	0.975205	maintain	5	1	3	4	3	1	1	6	4.33293	0.836818	2.35531	3.91047	3.95402	1.04853	1.26353	5.85523
mmu-miR-6992-3p	chr19	8743058	8743079	+	21	0.112752	0.935916	0.975205	maintain	0	2	4	1	0	3	0	3	0	1.67364	3.14041	0.977618	0	3.14559	0	2.92762
mmu-miR-10a-3p	chr11	96317227	96317248	+	21	0.110818	0.461216	0.975205	maintain	194	210	220	162	151	204	133	153	168.118	175.732	172.722	158.374	199.019	213.9	168.05	149.308
mmu-miR-155-5p	chr16	84714143	84714165	+	22	0.110481	0.297119	0.975205	maintain	18933	15726	19572	13905	11623	16964	11933	15371	16407.1	13159.8	15366	13593.8	15319.2	17787.2	15077.8	15000.1
mmu-miR-20a-5p	chr14	115044183	115044205	+	22	0.110143	0.509013	0.975205	maintain	8424	6001	6003	4497	4218	5391	4176	6806	7300.12	5021.75	4712.97	4396.35	5559.35	5652.62	5276.52	6641.79
mmu-miR-29a-3p	chr6	31062673	31062694	-	21	0.109568	0.262212	0.975205	maintain	91635	81500	92497	67174	60869	75423	64269	69629	79409.6	68200.7	72619.6	65670.5	80225.7	79083.2	81206.1	67949
mmu-miR-21a-3p	chr11	86584082	86584103	-	21	0.108817	0.635535	0.975205	maintain	96	118	87	74	50	81	60	122	83.1923	98.7446	68.3039	72.3438	65.9003	84.9308	75.8121	119.056
mmu-miR-378b	chr11	88352839	88352858	+	19	0.108723	0.162674	0.975205	maintain	2854	3050	3415	2530	2187	2591	2270	2578	2473.24	2552.3	2681.12	2473.37	2882.48	2716.74	2868.22	2515.8
mmu-miR-200b-5p	chr4	156055721	156055742	-	21	0.107821	0.829264	0.975205	maintain	12	16	13	18	10	20	14	4	10.399	13.3891	10.2063	17.5971	13.1801	20.9706	17.6895	3.90349
mmu-miR-202-3p	chr7	139957695	139957716	-	21	0.106716	0.926603	0.975205	maintain	2	0	1	5	1	2	1	3	1.73317	0	0.785102	4.88809	1.31801	2.09706	1.26353	2.92762
mmu-miR-323-3p	chr12	109712558	109712578	+	20	0.106051	0.935745	0.975205	maintain	0	2	2	2	1	0	1	3	0	1.67364	1.5702	1.95524	1.31801	0	1.26353	2.92762
mmu-miR-671-5p	chr5	24592132	24592154	+	22	0.102453	0.739137	0.975205	maintain	50	34	40	50	27	31	26	62	43.3293	28.4518	31.4041	48.8809	35.5861	32.5044	32.8519	60.5041
mmu-miR-8107	chr9	110636065	110636085	-	20	0.102392	0.938758	0.976333	maintain	2	2	1	0	1	1	1	1	1.73317	1.67364	0.785102	0	1.31801	1.04853	1.26353	0.975872
mmu-miR-107-3p	chr19	34820700	34820722	-	22	0.10237	0.228404	0.975205	maintain	14781	13589	14879	10916	8834	12478	10206	12638	12809	11371.5	11681.5	10671.7	11643.3	13083.5	12895.6	12333.1
mmu-miR-185-3p	chr16	18327405	18327425	-	20	0.100136	0.630492	0.975205	maintain	66	63	87	63	39	56	57	76	57.1947	52.7196	68.3039	61.59	51.4022	58.7176	72.0215	74.1663
mmu-let-7j	chr3	140028281	140028304	+	23	0.0989125	0.425987	0.975205	maintain	2076	2035	1937	1643	1155	1535	1471	2158	1799.03	1702.93	1520.74	1606.23	1522.3	1609.49	1858.66	2105.93
mmu-miR-181c-3p	chr8	84178885	84178906	-	21	0.0988127	0.430648	0.975205	maintain	965	1020	974	670	566	785	633	983	836.255	853.555	764.69	655.004	745.991	823.095	799.817	959.282
mmu-miR-3474	chr2	158638583	158638604	+	21	0.0966223	0.6536	0.975205	maintain	67	86	74	93	62	63	66	69	58.0613	71.9664	58.0976	90.9185	81.7163	66.0573	83.3933	67.3352
mmu-miR-466h-3p	chr2	10514940	10514958	+	18	0.0966071	0.964592	0.982718	maintain	0	4	0	0	2	1	0	0	0	3.34727	0	0	2.63601	1.04853	0	0
mmu-miR-129-5p	chr2;chr6	94241419;29022624	94241439;29022644	-;+	20;20	0.0949533	0.754743	0.975205	maintain	49	84	89	92	84	49	60	56	42.4627	70.2927	69.8741	89.9409	110.712	51.3779	75.8121	54.6488
mmu-miR-146a-3p	chr11	43374399	43374420	-	21	0.0944622	0.874998	0.975205	maintain	13	9	9	3	3	12	4	9	11.2656	7.53137	7.06592	2.93286	3.95402	12.5823	5.05414	8.78285
mmu-miR-194-2-3p	chr19	6264694	6264715	+	21	0.0928491	0.717239	0.975205	maintain	43	40	42	28	25	40	25	34	37.2632	33.4727	32.9743	27.3733	32.9501	41.9411	31.5884	33.1797
mmu-miR-92a-2-5p	chrX	52741892	52741913	-	21	0.0926356	0.930336	0.975205	maintain	1	3	3	3	0	1	5	2	0.866586	2.51046	2.35531	2.93286	0	1.04853	6.31767	1.95174
mmu-miR-103-3p	chr11;chr2	35782447;131288103	35782469;131288125	+;+	22;22	0.0915504	0.27999	0.975205	maintain	33833	31280	34035	25241	19959	28428	23491	28794	29319.2	26175.7	26721	24676.1	26306.1	29807.6	29681.7	28099.3
mmu-miR-5107-5p	chr18	60812086	60812106	+	20	0.0913743	0.627038	0.975205	maintain	111	164	157	149	100	120	131	116	96.191	137.238	123.261	145.665	131.801	125.823	165.523	113.201
mmu-miR-676-5p	chrX	100381114	100381135	+	21	0.0913446	0.683568	0.975205	maintain	78	61	84	60	40	59	45	88	67.5937	51.0459	65.9486	58.6571	52.7202	61.8632	56.859	85.8768
mmu-miR-3061-3p	chr11	52126804	52126825	+	21	0.0905247	0.811312	0.975205	maintain	16	13	24	15	9	16	14	16	13.8654	10.8786	18.8425	14.6643	11.862	16.7765	17.6895	15.614
mmu-miR-1258-5p	chr18	56538139	56538160	+	21	0.0902297	0.886837	0.975205	maintain	15	2	12	8	11	6	7	5	12.9988	1.67364	9.42123	7.82095	14.4981	6.29117	8.84474	4.87936
mmu-miR-20a-3p	chr14	115044219	115044240	+	21	0.0899882	0.837306	0.975205	maintain	28	21	9	15	11	13	19	16	24.2644	17.5732	7.06592	14.6643	14.4981	13.6309	24.0072	15.614
mmu-miR-204-3p	chr19	22750649	22750669	+	20	0.0888326	0.932903	0.975205	maintain	0	4	4	2	1	4	2	1	0	3.34727	3.14041	1.95524	1.31801	4.19411	2.52707	0.975872
mmu-miR-30c-2-3p	chr1	23291754	23291775	+	21	0.0877397	0.637128	0.975205	maintain	124	95	123	101	93	80	72	112	107.457	79.4977	96.5676	98.7395	122.575	83.8823	90.9745	109.298
mmu-miR-425-3p	chr9	108568830	108568850	+	20	0.0874737	0.364599	0.975205	maintain	1474	1416	1853	1244	987	1382	1043	1420	1277.35	1184.93	1454.79	1216.16	1300.87	1449.07	1317.87	1385.74
mmu-miR-6970-3p	chr17	34845104	34845124	-	20	0.0866397	0.950235	0.981819	maintain	0	4	1	1	1	1	0	3	0	3.34727	0.785102	0.977618	1.31801	1.04853	0	2.92762
mmu-miR-6538	chr12	26414970	26414988	-	18	0.086565	0.749832	0.975205	maintain	47	70	81	94	38	65	55	83	40.7295	58.5773	63.5933	91.8961	50.0842	68.1544	69.4944	80.9974
mmu-miR-7a-1-3p	chr13	58392800	58392821	-	21	0.0864657	0.435186	0.975205	maintain	604	534	614	415	381	492	367	504	523.418	446.861	482.053	405.712	502.16	515.876	463.717	491.84
mmu-miR-345-3p	chr12	108837027	108837048	+	21	0.0858903	0.478664	0.975205	maintain	211	234	233	191	160	178	147	216	182.85	195.816	182.929	186.725	210.881	186.638	185.74	210.788
mmu-miR-200a-3p	chr4	156054911	156054932	-	21	0.0837706	0.319931	0.975205	maintain	2092	2197	2145	1747	1388	1866	1570	1739	1812.9	1838.49	1684.04	1707.9	1829.39	1956.55	1983.75	1697.04
mmu-miR-106b-3p	chr5	138165746	138165767	-	21	0.0825062	0.24456	0.975205	maintain	8187	8057	9212	7610	5434	6949	6211	8083	7094.74	6742.25	7232.36	7439.68	7162.04	7286.23	7847.81	7887.97
mmu-miR-181a-2-3p	chr2	38852785	38852806	+	21	0.0824591	0.604937	0.975205	maintain	130	161	140	121	94	106	95	151	112.656	134.728	109.914	118.292	123.893	111.144	120.036	147.357
mmu-miR-542-3p	chrX	53049415	53049436	-	21	0.0817978	0.754689	0.975205	maintain	87	85	74	48	39	56	46	99	75.393	71.1296	58.0976	46.9257	51.4022	58.7176	58.1226	96.6113
mmu-miR-3087-3p	chr2	25442813	25442833	+	20	0.0812986	0.866453	0.975205	maintain	10	11	15	10	9	9	13	5	8.66586	9.205	11.7765	9.77618	11.862	9.43676	16.4259	4.87936
mmu-miR-17-5p	chr14	115043684	115043706	+	22	0.0809276	0.566748	0.975205	maintain	4758	3891	4060	2981	2372	3311	2693	4361	4123.22	3256.06	3187.52	2914.28	3126.31	3471.68	3402.7	4255.78
mmu-miR-3970	chr19	33157122	33157141	+	19	0.0796216	0.455279	0.975205	maintain	673	596	711	533	442	477	485	605	583.212	498.744	558.208	521.071	582.558	500.148	612.814	590.403
mmu-miR-5116	chrX	56587892	56587912	-	20	0.0775079	0.911576	0.975205	maintain	6	11	4	2	6	3	4	5	5.19952	9.205	3.14041	1.95524	7.90803	3.14559	5.05414	4.87936
mmu-miR-378d	chr10	126710355	126710376	-	21	0.0767697	0.705907	0.975205	maintain	78	97	115	65	52	86	73	71	67.5937	81.1714	90.2868	63.5452	68.5363	90.1735	92.238	69.2869
mmu-miR-141-3p	chr6	124717917	124717938	-	21	0.0746917	0.377723	0.975205	maintain	1887	1992	1951	1576	1270	1668	1408	1552	1635.25	1666.94	1531.73	1540.73	1673.87	1748.95	1779.06	1514.55
mmu-miR-6971-3p	chr17	34841809	34841829	-	20	0.0736353	0.964549	0.982718	maintain	1	2	0	1	2	0	1	0	0.866586	1.67364	0	0.977618	2.63601	0	1.26353	0
mmu-miR-5120	chr4	44607536	44607558	-	22	0.0730399	0.801882	0.975205	maintain	32	33	33	30	17	24	33	28	27.7308	27.615	25.9084	29.3286	22.4061	25.1647	41.6966	27.3244
mmu-let-7f-5p	chr13;chrX	48537889;151912353	48537910;151912374	-;+	21;21	0.0695984	0.367774	0.975205	maintain	2069143	2121175	2348104	1811128	1371636	1862372	1622482	1769255	1.79309e+06	1.77504e+06	1.8435e+06	1.77059e+06	1.80782e+06	1.95275e+06	2.05006e+06	1.72657e+06
mmu-let-7d-5p	chr13	48536078	48536099	-	21	0.0688572	0.510193	0.975205	maintain	60114	61418	70339	54300	41350	60059	45965	47754	52093.9	51395.7	55223.3	53084.7	54499.5	62973.6	58078.4	46601.8
mmu-miR-421-3p	chrX	103572930	103572952	-	22	0.0678353	0.457034	0.975205	maintain	890	814	961	744	528	753	640	799	771.262	681.17	754.483	727.348	695.907	789.542	808.662	779.722
mmu-miR-28a-3p	chr16	24827908	24827929	+	21	0.0671359	0.539102	0.975205	maintain	3340	3814	4425	3884	2675	3161	3048	3385	2894.4	3191.63	3474.08	3797.07	3525.66	3314.4	3851.25	3303.33
mmu-miR-547-3p	chrX	67988383	67988403	-	20	0.0668411	0.889276	0.975205	maintain	9	10	20	8	9	13	6	9	7.79927	8.36818	15.702	7.82095	11.862	13.6309	7.58121	8.78285
mmu-miR-6976-5p	chr17	46553862	46553884	-	22	0.0637474	0.972746	0.987668	maintain	1	2	0	1	0	0	3	0	0.866586	1.67364	0	0.977618	0	0	3.7906	0
mmu-miR-221-5p	chrX	19146344	19146369	-	25	0.0631767	0.664713	0.975205	maintain	172	177	171	126	122	141	115	131	149.053	148.117	134.252	123.18	160.797	147.843	145.306	127.839
mmu-miR-93-3p	chr5	138165536	138165557	-	21	0.0627167	0.710792	0.975205	maintain	137	156	178	131	132	109	96	136	118.722	130.544	139.748	128.068	173.977	114.29	121.299	132.719
mmu-miR-23b-3p	chr13	63300529	63300549	+	20	0.0614986	0.480095	0.975205	maintain	21546	23142	22311	18766	14840	16215	16586	20087	18671.5	19365.7	17516.4	18346	19559.2	17001.9	20957	19602.3
mmu-miR-30c-1-3p	chr4	120769546	120769567	-	21	0.060868	0.668345	0.975205	maintain	194	222	240	156	144	173	159	160	168.118	185.774	188.425	152.508	189.793	181.395	200.902	156.14
mmu-miR-23a-3p	chr8	84208563	84208583	+	20	0.0603642	0.490177	0.975205	maintain	20599	22876	21569	18069	14448	15863	16080	19123	17850.8	19143.1	16933.9	17664.6	19042.5	16632.8	20317.6	18661.6
mmu-miR-342-5p	chr12	108658638	108658659	+	21	0.0592592	0.714441	0.975205	maintain	1128	1650	1777	1637	1209	1202	1179	1267	977.509	1380.75	1395.13	1600.36	1593.47	1260.33	1489.71	1236.43
mmu-miR-10b-5p	chr2	74726074	74726096	+	22	0.0591165	0.535337	0.975205	maintain	1639	1825	1793	1466	1290	1442	1056	1522	1420.33	1527.19	1407.69	1433.19	1700.23	1511.98	1334.29	1485.28
mmu-miR-361-5p	chrX	113074867	113074888	-	21	0.0584965	0.546617	0.975205	maintain	1823	1899	2074	1572	1437	1550	1281	1500	1579.79	1589.12	1628.3	1536.82	1893.97	1625.22	1618.59	1463.81
mmu-miR-215-5p	chr1	185313610	185313630	+	20	0.0564957	0.872112	0.975205	maintain	23	23	23	21	11	25	21	14	19.9315	19.2468	18.0574	20.53	14.4981	26.2132	26.5342	13.6622
mmu-miR-532-5p	chrX	7248456	7248477	-	21	0.0560189	0.502509	0.975205	maintain	13875	13698	16442	12447	8732	12015	10947	12858	12023.9	11462.7	12908.7	12168.4	11508.8	12598.1	13831.9	12547.8
mmu-miR-5129-5p	chr2	45023146	45023167	-	21	0.0540287	0.927441	0.975205	maintain	12	8	4	5	4	6	6	7	10.399	6.69455	3.14041	4.88809	5.27202	6.29117	7.58121	6.83111
mmu-miR-744-3p	chr11	65734742	65734763	-	21	0.0532489	0.834869	0.975205	maintain	56	42	43	49	33	40	26	53	48.5288	35.1464	33.7594	47.9033	43.4942	41.9411	32.8519	51.7212
mmu-miR-30e-5p	chr4	120772660	120772681	-	21	0.0505193	0.542597	0.975205	maintain	41819	44748	41154	32641	26583	34683	27052	38156	36239.8	37445.9	32310.1	31910.4	35036.5	36366.1	34181.1	37235.4
mmu-miR-15b-5p	chr3	69009775	69009796	+	21	0.0494627	0.590533	0.975205	maintain	8733	8740	8896	6947	5447	7980	5858	6875	7567.9	7313.79	6984.27	6791.51	7179.18	8367.26	7401.78	6709.12
mmu-miR-331-5p	chr10	93963817	93963838	-	21	0.0476788	0.858112	0.975205	maintain	30	59	63	39	31	43	34	41	25.9976	49.3723	49.4614	38.1271	40.8582	45.0867	42.9602	40.0108
mmu-miR-181c-5p	chr8	84178924	84178945	-	21	0.0457864	0.620537	0.975205	maintain	683	709	746	559	436	625	476	575	591.878	593.304	585.686	546.489	574.65	655.33	601.442	561.127
mmu-miR-96-5p	chr6	30169506	30169528	-	22	0.0431481	0.83129	0.975205	maintain	73	121	100	68	59	79	64	80	63.2608	101.255	78.5102	66.478	77.7623	82.8338	80.8662	78.0698
mmu-miR-3091-5p	chr2	180257547	180257567	+	20	0.0430079	0.941886	0.977761	maintain	7	5	11	5	4	5	4	9	6.0661	4.18409	8.63612	4.88809	5.27202	5.24264	5.05414	8.78285
mmu-miR-1843b-5p	chr1	159340362	159340382	+	20	0.0428124	0.487113	0.975205	maintain	4158	4630	4751	3979	3001	3591	3112	3997	3603.26	3874.47	3730.02	3889.94	3955.33	3765.27	3932.12	3900.56
mmu-miR-700-3p	chr4	135416561	135416581	-	20	0.0416098	0.863966	0.975205	maintain	330	389	465	374	249	504	250	214	285.973	325.522	365.073	365.629	328.183	528.458	315.884	208.837
mmu-miR-497a-5p	chr11	70234730	70234751	+	21	0.0412561	0.909645	0.975205	maintain	27	15	25	18	18	12	15	21	23.3978	12.5523	19.6276	17.5971	23.7241	12.5823	18.953	20.4933
mmu-miR-669e-5p	chr2	10467537	10467558	+	21	0.0399843	0.881272	0.975205	maintain	66	73	71	29	43	51	34	57	57.1947	61.0877	55.7423	28.3509	56.6742	53.475	42.9602	55.6247
mmu-miR-340-5p	chr11	50069720	50069741	+	21	0.0352908	0.841383	0.975205	maintain	16868	15485	12843	11302	7724	10627	9458	17049	14617.6	12958.1	10083.1	11049	10180.3	11142.7	11950.5	16637.6
mmu-miR-3057-5p	chr10	81271610	81271633	+	23	0.0345344	0.919028	0.975205	maintain	16	26	26	19	17	15	17	18	13.8654	21.7573	20.4127	18.5747	22.4061	15.7279	21.4801	17.5657
mmu-miR-1930-5p	chr10	77641236	77641257	+	21	0.0330721	0.946356	0.979642	maintain	11	12	16	14	10	6	17	7	9.53245	10.0418	12.5616	13.6867	13.1801	6.29117	21.4801	6.83111
mmu-miR-7116-3p	chr11	100478411	100478432	-	21	0.0300772	0.986907	0.994009	maintain	0	2	2	0	0	2	1	0	0	1.67364	1.5702	0	0	2.09706	1.26353	0
mmu-miR-106a-5p	chrX	52742541	52742563	-	22	0.027988	0.856699	0.975205	maintain	465	417	367	273	246	355	242	338	402.962	348.953	288.133	266.89	324.229	372.228	305.775	329.845
mmu-miR-467e-5p	chr2	10505731	10505752	+	21	0.0249611	0.836216	0.975205	maintain	1349	1353	1252	1065	853	1208	864	942	1169.02	1132.22	982.948	1041.16	1124.26	1266.62	1091.69	919.272
mmu-miR-6238	chr7	53891796	53891817	-	21	0.0248272	0.954307	0.982582	maintain	36	9	39	31	18	16	25	30	31.1971	7.53137	30.619	30.3062	23.7241	16.7765	31.5884	29.2762
mmu-miR-181d-5p	chr8	84178759	84178781	-	22	0.0236642	0.79153	0.975205	maintain	2867	3241	3373	2524	1808	2771	1993	2739	2484.5	2712.13	2648.15	2467.51	2382.95	2905.47	2518.22	2672.91
mmu-miR-8094	chr17	35251314	35251334	+	20	0.0224163	0.949789	0.981819	maintain	19	17	19	21	10	16	16	17	16.4651	14.2259	14.9169	20.53	13.1801	16.7765	20.2166	16.5898
mmu-miR-330-5p	chr7	19181486	19181507	+	21	0.0213296	0.849503	0.975205	maintain	795	936	1058	808	683	764	565	744	688.936	783.262	830.638	789.916	900.198	801.076	713.897	726.049
mmu-miR-3965	chr5	134326494	134326512	+	18	0.0210736	0.988325	0.994046	maintain	1	0	1	3	1	0	1	2	0.866586	0	0.785102	2.93286	1.31801	0	1.26353	1.95174
mmu-miR-1949	chr18	35554612	35554635	+	23	0.0208497	0.918611	0.975205	maintain	71	58	70	71	43	56	50	60	61.5276	48.5355	54.9572	69.4109	56.6742	58.7176	63.1767	58.5523
mmu-miR-7012-5p	chr3	90270154	90270176	+	22	0.019877	0.976346	0.989156	maintain	5	3	8	5	5	4	3	4	4.33293	2.51046	6.28082	4.88809	6.59003	4.19411	3.7906	3.90349
mmu-miR-16-1-3p	chr14	61631894	61631915	-	21	0.0193121	0.934188	0.975205	maintain	871	843	764	728	394	495	515	1145	754.796	705.438	599.818	711.706	519.294	519.022	650.72	1117.37
mmu-miR-22-5p	chr11	75463734	75463755	+	21	0.017501	0.856254	0.975205	maintain	1018	982	1058	769	620	788	606	938	882.185	821.756	830.638	751.789	817.163	826.241	765.702	915.368
mmu-miR-7656-5p	chr9	94751829	94751850	+	21	0.0160939	0.974931	0.988442	maintain	9	8	12	12	12	7	6	6	7.79927	6.69455	9.42123	11.7314	15.8161	7.3397	7.58121	5.85523
mmu-miR-7212-5p	chr15	25948227	25948247	+	20	0.0134832	0.9813	0.991284	maintain	10	10	10	4	2	6	9	9	8.66586	8.36818	7.85102	3.91047	2.63601	6.29117	11.3718	8.78285
mmu-miR-6918-5p	chr11	4891350	4891372	+	22	0.0130888	0.993245	0.99755	maintain	0	2	1	1	1	0	1	1	0	1.67364	0.785102	0.977618	1.31801	0	1.26353	0.975872
mmu-let-7i-3p	chr10	122985642	122985663	-	21	0.00900836	0.951446	0.981819	maintain	176	209	265	192	137	162	135	211	152.519	174.895	208.052	187.703	180.567	169.862	170.577	205.909
mmu-miR-363-3p	chrX	52741697	52741718	-	21	0.00897769	0.934368	0.975205	maintain	2939	2723	3426	2206	1950	2542	1803	2276	2546.9	2278.66	2689.76	2156.63	2570.11	2665.36	2278.15	2221.09
mmu-miR-127-3p	chr12	109592888	109592909	+	21	0.00756686	0.964537	0.982718	maintain	181	183	212	140	140	157	123	118	156.852	153.138	166.442	136.867	184.521	164.619	155.415	115.153
mmu-miR-669d-5p	chr2;chr2	10468384;10471658	10468405;10471679	+;+	21;21	0.00541474	0.983922	0.99249	maintain	80	66	88	34	36	64	50	52	69.3269	55.23	69.089	33.239	47.4482	67.1058	63.1767	50.7454
mmu-miR-146b-5p	chr19	46342790	46342811	+	21	0.00523854	0.946518	0.979642	maintain	258617	228576	270067	207588	163024	199417	169572	199991	224114	191277	212030	202942	214867	209094	214260	195166
mmu-miR-3086-5p	chr19	58911725	58911744	-	19	0.00478785	0.995479	0.999073	maintain	5	3	2	3	3	3	1	3	4.33293	2.51046	1.5702	2.93286	3.95402	3.14559	1.26353	2.92762
mmu-miR-320-3p	chr14	70443557	70443578	+	21	0.00416781	0.979111	0.989792	maintain	2009	2325	2394	2179	1733	1405	1811	1718	1740.97	1945.6	1879.53	2130.23	2284.1	1473.18	2288.26	1676.55
mmu-miR-148a-3p	chr6	51269829	51269850	-	21	0.00355384	0.982285	0.991558	maintain	153796	186294	184530	166941	99813	111301	122960	199925	133277	155894	144875	163205	131554	116702	155364	195101
mmu-miR-20b-5p	chrX	52742159	52742181	-	22	0.00304855	0.979095	0.989792	maintain	1642	1428	1535	1100	948	1249	1009	1104	1422.93	1194.98	1205.13	1075.38	1249.47	1309.61	1274.91	1077.36
mmu-miR-27b-5p	chr13	63300718	63300739	+	21	0.00292153	0.987427	0.994009	maintain	147	118	175	109	75	118	114	108	127.388	98.7446	137.393	106.56	98.8504	123.726	144.043	105.394
mmu-miR-6912-5p	chr10	80609265	80609286	+	21	0.00112347	0.999227	0.999275	maintain	1	4	1	2	2	3	1	0	0.866586	3.34727	0.785102	1.95524	2.63601	3.14559	1.26353	0
mmu-miR-6933-5p	chr11	118002279	118002300	+	21	-0.000809404	0.999275	0.999275	maintain	1	5	3	3	2	2	3	2	0.866586	4.18409	2.35531	2.93286	2.63601	2.09706	3.7906	1.95174
mmu-miR-134-5p	chr12	109734145	109734166	+	21	-0.00190852	0.997808	0.999275	maintain	2	6	7	6	4	6	2	4	1.73317	5.02091	5.49572	5.86571	5.27202	6.29117	2.52707	3.90349
mmu-miR-423-5p	chr11	77078122	77078144	-	22	-0.0024779	0.987573	0.994009	maintain	5682	8184	7555	6717	5047	4965	5839	5120	4923.94	6848.52	5931.45	6566.66	6651.97	5205.94	7377.78	4996.47
mmu-miR-26b-5p	chr1	74394324	74394344	+	20	-0.00335043	0.953773	0.982582	maintain	107007	106672	110768	96916	67281	88667	71734	92813	92730.8	89265.1	86964.2	94746.9	88676.7	92969.9	90638.4	90573.6
mmu-miR-29b-3p	chr1;chr6	195037091;31063025	195037113;31063047	+;-	22;22	-0.00358459	0.970114	0.985859	maintain	4170	3741	3690	3108	2413	2819	2498	3438	3613.66	3130.54	2897.03	3038.44	3180.35	2955.8	3156.31	3355.05
mmu-miR-223-5p	chrX	96242842	96242864	+	22	-0.00407945	0.961231	0.982718	maintain	1386	1574	1616	1403	958	1180	990	1424	1201.09	1317.15	1268.73	1371.6	1262.65	1237.26	1250.9	1389.64
mmu-miR-6913-3p	chr10	81386390	81386412	+	22	-0.00471937	0.997944	0.999275	maintain	2	2	0	0	1	2	0	0	1.73317	1.67364	0	0	1.31801	2.09706	0	0
mmu-miR-7237-3p	chr8	121978065	121978086	+	21	-0.00502388	0.997036	0.999275	maintain	2	3	4	0	4	0	2	0	1.73317	2.51046	3.14041	0	5.27202	0	2.52707	0
mmu-miR-146a-5p	chr11	43374435	43374456	-	21	-0.00526433	0.946425	0.979642	maintain	348769	304578	352077	277637	212766	260991	226362	267282	302238	254876	276416	271423	280427	273657	286016	260833
mmu-let-7i-5p	chr10	122985698	122985719	-	21	-0.00716032	0.933773	0.975205	maintain	1497483	1362508	1464449	1162438	815097	1102726	948842	1302634	1.2977e+06	1.14017e+06	1.14974e+06	1.13642e+06	1.0743e+06	1.15624e+06	1.19889e+06	1.2712e+06
mmu-miR-676-3p	chrX	100381151	100381171	+	20	-0.00907354	0.950761	0.981819	maintain	363	463	577	455	290	428	281	412	314.571	387.447	453.004	444.816	382.222	448.77	355.053	402.059
mmu-miR-664-5p	chr1	185242975	185242995	+	20	-0.00920173	0.962323	0.982718	maintain	144	177	241	145	122	150	138	113	124.788	148.117	189.21	141.755	160.797	157.279	174.368	110.274
mmu-miR-1839-3p	chr7	81529958	81529980	+	22	-0.00963686	0.941149	0.977725	maintain	251	248	268	244	164	207	147	252	217.513	207.531	210.407	238.539	216.153	217.045	185.74	245.92
mmu-miR-26b-3p	chr1	74394360	74394381	+	21	-0.0108993	0.936828	0.975424	maintain	182	181	221	161	109	170	116	169	157.719	151.464	173.508	157.397	143.663	178.25	146.57	164.922
mmu-miR-185-5p	chr16	18327438	18327459	-	21	-0.0117455	0.87316	0.975205	maintain	5591	5166	5826	4325	3285	4332	3635	4469	4845.08	4323	4574.01	4228.2	4329.65	4542.23	4592.95	4361.17
mmu-miR-669m-5p	chr2;chr2	10512814;10513457	10512836;10513479	+;+	22;22	-0.0120924	0.939106	0.976333	maintain	125	113	123	95	81	92	71	99	108.323	94.5605	96.5676	92.8737	106.758	96.4646	89.7109	96.6113
mmu-miR-592-5p	chr6	27936711	27936733	-	22	-0.0124104	0.965043	0.982718	maintain	82	93	125	55	47	69	40	115	71.06	77.8241	98.1378	53.769	61.9463	72.3485	50.5414	112.225
mmu-miR-25-3p	chr5	138165332	138165353	-	21	-0.0126902	0.857934	0.975205	maintain	106500	103280	122495	94018	68568	92356	67709	93070	92291.4	86426.6	96171.1	91913.7	90373	96837.9	85552.7	90824.4
mmu-miR-18a-3p	chr14	115043908	115043929	+	21	-0.013058	0.935387	0.975205	maintain	127	150	165	118	87	120	77	140	110.056	125.523	129.542	115.359	114.666	125.823	97.2921	136.622
mmu-miR-194-5p	chr1;chr19	185313325;6264658	185313346;6264679	+;+	21;21	-0.0131707	0.874123	0.975205	maintain	7513	7034	7367	6146	4315	6270	4484	6187	6510.66	5886.18	5783.85	6008.44	5687.19	6574.27	5665.69	6037.72
mmu-miR-32-5p	chr4	56895272	56895293	-	21	-0.013254	0.923289	0.975205	maintain	2393	2422	1940	1640	1261	1596	1381	2130	2073.74	2026.77	1523.1	1603.29	1662	1673.45	1744.94	2078.61
mmu-miR-1947-5p	chr16	33105375	33105396	+	21	-0.0139045	0.943556	0.978764	maintain	87	96	107	85	75	56	69	79	75.393	80.3346	84.0059	83.0976	98.8504	58.7176	87.1839	77.0939
mmu-miR-12182-3p	chr11	86852604	86852625	-	21	-0.0155696	0.959852	0.982718	maintain	31	33	34	29	19	22	15	41	26.8642	27.615	26.6935	28.3509	25.0421	23.0676	18.953	40.0108
mmu-miR-872-3p	chr4	94665206	94665227	+	21	-0.0156668	0.917293	0.975205	maintain	195	158	200	140	129	132	113	143	168.984	132.217	157.02	136.867	170.023	138.406	142.779	139.55
mmu-miR-99b-5p	chr17	17830194	17830215	+	21	-0.0160657	0.907302	0.975205	maintain	1163	1499	1623	1403	1085	1094	987	1058	1007.84	1254.39	1274.22	1371.6	1430.04	1147.09	1247.11	1032.47
mmu-miR-29c-3p	chr1	195037600	195037621	+	21	-0.019091	0.833006	0.975205	maintain	1471	1358	1453	1200	977	1109	900	1105	1274.75	1136.4	1140.75	1173.14	1287.69	1162.82	1137.18	1078.34
mmu-miR-21a-5p	chr11	86584120	86584141	-	21	-0.0194358	0.882302	0.975205	maintain	495731	511782	436356	384830	275518	332122	290412	489042	429594	428269	342584	376217	363134	348239	366946	477242
mmu-miR-200a-5p	chr4	156054949	156054970	-	21	-0.0209762	0.919692	0.975205	maintain	70	56	77	68	43	60	48	52	60.661	46.8618	60.4529	66.478	56.6742	62.9117	60.6497	50.7454
mmu-miR-872-5p	chr4	94665167	94665187	+	20	-0.0217629	0.831758	0.975205	maintain	3271	2905	3178	2456	1723	2554	1840	2799	2834.6	2430.96	2495.06	2401.03	2270.92	2677.94	2324.9	2731.47
mmu-miR-6978-3p	chr17	57217172	57217194	-	22	-0.0225413	0.992151	0.997173	maintain	0	1	2	0	2	0	0	0	0	0.836818	1.5702	0	2.63601	0	0	0
mmu-miR-200c-3p	chr6	124718324	124718346	-	22	-0.0244248	0.814009	0.975205	maintain	2540	3088	3327	2845	1996	2311	2124	2329	2201.13	2584.1	2612.04	2781.32	2630.74	2423.15	2683.75	2272.81
mmu-miR-125a-5p	chr17	17830817	17830840	+	23	-0.0251006	0.888893	0.975205	maintain	810	1155	1233	1109	783	985	738	677	701.935	966.525	968.031	1084.18	1032	1032.8	932.488	660.665
mmu-miR-335-5p	chr6	30741314	30741336	+	22	-0.0262627	0.961484	0.982718	maintain	9	17	12	10	5	6	5	21	7.79927	14.2259	9.42123	9.77618	6.59003	6.29117	6.31767	20.4933
mmu-miR-19a-3p	chr14	115044048	115044070	+	22	-0.0277026	0.893909	0.975205	maintain	1734	1754	1169	1121	739	1089	870	1713	1502.66	1467.78	917.785	1095.91	974.006	1141.85	1099.27	1671.67
mmu-miR-29c-5p	chr1	195037562	195037583	+	21	-0.027828	0.892411	0.975205	maintain	146	145	136	100	72	77	104	140	126.522	121.339	106.774	97.7618	94.8964	80.7367	131.408	136.622
mmu-let-7g-5p	chr9	106178846	106178867	+	21	-0.0291104	0.729836	0.975205	maintain	1585766	1438433	1534371	1233979	846266	1172556	987227	1329079	1.3742e+06	1.20371e+06	1.20464e+06	1.20636e+06	1.11538e+06	1.22946e+06	1.2474e+06	1.29701e+06
mmu-miR-7115-5p	chr11	70438256	70438279	+	23	-0.0298577	0.960293	0.982718	maintain	4	7	16	8	3	5	8	10	3.46634	5.85773	12.5616	7.82095	3.95402	5.24264	10.1083	9.75872
mmu-miR-7036b-5p	chr5	34574151	34574172	+	21	-0.031343	0.964939	0.982718	maintain	8	2	6	10	4	2	4	10	6.93269	1.67364	4.71061	9.77618	5.27202	2.09706	5.05414	9.75872
mmu-miR-467h	chr9	115381898	115381919	+	21	-0.0322135	0.970256	0.985859	maintain	3	9	2	6	6	6	0	3	2.59976	7.53137	1.5702	5.86571	7.90803	6.29117	0	2.92762
mmu-miR-22-3p	chr11	75463772	75463793	+	21	-0.0352675	0.730916	0.975205	maintain	11238	12313	11563	9341	6637	8169	7231	11145	9738.69	10303.7	9078.14	9131.93	8747.6	8565.43	9136.62	10876.1
mmu-miR-7b-5p	chr17	56243017	56243040	+	23	-0.0356009	0.816428	0.975205	maintain	406	387	337	291	191	259	248	365	351.834	323.849	264.579	284.487	251.739	271.569	313.357	356.193
mmu-miR-15b-3p	chr3	69009813	69009834	+	21	-0.0425071	0.617628	0.975205	maintain	2124	1936	2183	1932	1229	1719	1323	1803	1840.63	1620.08	1713.88	1888.76	1619.83	1802.42	1671.66	1759.5
mmu-miR-30b-3p	chr15	68337431	68337452	-	21	-0.0426464	0.673542	0.975205	maintain	870	840	941	733	468	645	604	788	753.93	702.927	738.781	716.594	616.827	676.301	763.175	768.987
mmu-miR-669b-5p	chr2	10467814	10467835	+	21	-0.0477049	0.821917	0.975205	maintain	61	56	61	47	39	45	35	46	52.8617	46.8618	47.8912	45.9481	51.4022	47.1838	44.2237	44.8901
mmu-miR-3068-5p	chr12	87437724	87437747	-	23	-0.0499433	0.699504	0.975205	maintain	597	575	557	382	355	399	318	472	517.352	481.171	437.302	373.45	467.892	418.363	401.804	460.612
mmu-miR-7a-5p	chr13;chr7	58392841;78888295	58392863;78888317	-;+	22;22	-0.0500824	0.71062	0.975205	maintain	251108	214187	203651	167849	117866	153900	137257	211175	217607	179236	159887	164092	155348	161369	173429	206080
mmu-miR-7071-5p	chr8	88138211	88138233	+	22	-0.0510232	0.977508	0.989612	maintain	4	1	0	0	0	1	0	3	3.46634	0.836818	0	0	0	1.04853	0	2.92762
mmu-miR-411-5p	chr12	109710190	109710210	+	20	-0.051734	0.896678	0.975205	maintain	19	18	36	13	18	18	9	17	16.4651	15.0627	28.2637	12.709	23.7241	18.8735	11.3718	16.5898
mmu-miR-346-5p	chr14	34894624	34894646	+	22	-0.0552309	0.964193	0.982718	maintain	1	1	4	1	2	2	0	1	0.866586	0.836818	3.14041	0.977618	2.63601	2.09706	0	0.975872
mmu-miR-672-5p	chrX	104116228	104116250	-	22	-0.0557345	0.923886	0.975205	maintain	12	8	4	9	6	5	8	5	10.399	6.69455	3.14041	8.79857	7.90803	5.24264	10.1083	4.87936
mmu-miR-92b-3p	chr3	89227126	89227147	-	21	-0.059134	0.675775	0.975205	maintain	322	406	409	367	283	302	229	276	279.041	339.748	321.107	358.786	372.996	316.656	289.349	269.341
mmu-miR-6935-3p	chr11	120347350	120347369	-	19	-0.0616759	0.962124	0.982718	maintain	1	1	2	3	3	2	0	0	0.866586	0.836818	1.5702	2.93286	3.95402	2.09706	0	0
mmu-miR-7046-3p	chr7	24970010	24970031	-	21	-0.0617626	0.973783	0.987999	maintain	0	3	1	0	0	2	0	1	0	2.51046	0.785102	0	0	2.09706	0	0.975872
mmu-miR-148b-3p	chr15	103285185	103285206	+	21	-0.0621105	0.637258	0.975205	maintain	13386	14134	12784	10970	6623	9364	8595	13235	11600.1	11827.6	10036.7	10724.5	8729.15	9818.42	10860.1	12915.7
mmu-miR-682	chr13	75645119	75645139	+	20	-0.0624971	0.908379	0.975205	maintain	16	11	17	18	4	14	4	26	13.8654	9.205	13.3467	17.5971	5.27202	14.6794	5.05414	25.3727
mmu-miR-1943-5p	chr15	79375271	79375293	-	22	-0.062853	0.834464	0.975205	maintain	45	69	52	41	45	31	42	28	38.9964	57.7405	40.8253	40.0824	59.3102	32.5044	53.0684	27.3244
mmu-miR-7013-5p	chr3	95004173	95004194	+	21	-0.0637592	0.961071	0.982718	maintain	4	1	3	1	1	0	5	0	3.46634	0.836818	2.35531	0.977618	1.31801	0	6.31767	0
mmu-miR-3082-5p	chr17	25831406	25831427	-	21	-0.064679	0.96604	0.983013	maintain	0	3	3	0	1	1	2	0	0	2.51046	2.35531	0	1.31801	1.04853	2.52707	0
mmu-miR-8108	chr8	25159150	25159171	-	21	-0.0648633	0.957101	0.982718	maintain	0	6	0	5	2	2	3	1	0	5.02091	0	4.88809	2.63601	2.09706	3.7906	0.975872
mmu-miR-12191-3p	chr18	34759575	34759595	+	20	-0.0709757	0.83687	0.975205	maintain	28	21	23	29	14	17	24	18	24.2644	17.5732	18.0574	28.3509	18.4521	17.825	30.3248	17.5657
mmu-miR-8096	chr1	85751983	85752002	+	19	-0.0709943	0.915434	0.975205	maintain	2	13	14	4	5	7	7	4	1.73317	10.8786	10.9914	3.91047	6.59003	7.3397	8.84474	3.90349
mmu-miR-192-5p	chr19	6264857	6264877	+	20	-0.0725023	0.361508	0.975205	maintain	15569	16078	17329	14615	9351	11782	11483	13285	13491.9	13454.4	13605	14287.9	12324.7	12353.8	14509.2	12964.5
mmu-miR-139-3p	chr7	101475418	101475439	+	21	-0.0729485	0.71327	0.975205	maintain	183	305	273	232	167	190	195	153	158.585	255.23	214.333	226.807	220.107	199.22	246.389	149.308
mmu-miR-7033-5p	chr5	135383783	135383805	-	22	-0.0743943	0.804996	0.975205	maintain	26	31	41	34	24	22	27	21	22.5312	25.9414	32.1892	33.239	31.6321	23.0676	34.1154	20.4933
mmu-miR-6537-3p	chr7	25097089	25097111	-	22	-0.0755894	0.907786	0.975205	maintain	11	9	7	4	1	5	5	12	9.53245	7.53137	5.49572	3.91047	1.31801	5.24264	6.31767	11.7105
mmu-miR-3962	chr1	194822035	194822054	+	19	-0.0769341	0.409946	0.975205	maintain	2557	2347	2425	1878	1318	1922	1475	1937	2215.86	1964.01	1903.87	1835.97	1737.13	2015.27	1863.71	1890.26
mmu-miR-3082-3p	chr17	25831366	25831387	-	21	-0.0769533	0.827446	0.975205	maintain	15	25	21	23	11	17	14	19	12.9988	20.9205	16.4871	22.4852	14.4981	17.825	17.6895	18.5416
mmu-miR-669l-5p	chr2	10468989	10469010	+	21	-0.0779274	0.536506	0.975205	maintain	213	219	223	198	149	159	132	173	184.583	183.263	175.078	193.568	196.383	166.716	166.787	168.826
mmu-miR-1981-5p	chr1	184822465	184822488	-	23	-0.0807737	0.400248	0.975205	maintain	1148	1405	1382	1195	786	910	876	1113	994.841	1175.73	1085.01	1168.25	1035.95	954.161	1106.86	1086.15
mmu-miR-6943-5p	chr13	55453111	55453130	+	19	-0.081055	0.923513	0.975205	maintain	4	2	6	2	1	3	3	3	3.46634	1.67364	4.71061	1.95524	1.31801	3.14559	3.7906	2.92762
mmu-miR-350-5p	chr1	176772382	176772400	-	18	-0.0818428	0.599264	0.975205	maintain	113	129	136	120	83	101	72	102	97.9242	107.95	106.774	117.314	109.394	105.901	90.9745	99.539
mmu-miR-339-5p	chr5	139369708	139369730	-	22	-0.0822184	0.489369	0.975205	maintain	1573	1480	1303	1261	826	1195	815	1243	1363.14	1238.49	1022.99	1232.78	1088.67	1252.99	1029.78	1213.01
mmu-miR-8099	chr12;chr3	93927373;95139131	93927393;95139151	+;-	20;20	-0.083911	0.95404	0.982582	maintain	0	2	2	2	2	0	2	0	0	1.67364	1.5702	1.95524	2.63601	0	2.52707	0
mmu-miR-21b	chr3	29636768	29636790	+	22	-0.084249	0.699489	0.975205	maintain	118	119	108	85	59	73	55	126	102.257	99.5814	84.791	83.0976	77.7623	76.5426	69.4944	122.96
mmu-miR-3084-3p	chr19;chr19	24942240;60774334	24942260;60774354	-;-	20;20	-0.0870555	0.847327	0.975205	maintain	8	18	28	16	6	16	14	14	6.93269	15.0627	21.9829	15.6419	7.90803	16.7765	17.6895	13.6622
mmu-miR-466g	chr2	10514642	10514662	+	20	-0.0877885	0.820598	0.975205	maintain	23	16	17	21	7	14	15	20	19.9315	13.3891	13.3467	20.53	9.22604	14.6794	18.953	19.5174
mmu-miR-195a-3p	chr11	70235100	70235121	+	21	-0.0878322	0.762302	0.975205	maintain	40	67	67	45	49	44	30	30	34.6634	56.0668	52.6019	43.9928	64.5823	46.1353	37.906	29.2762
mmu-miR-186-5p	chr3	157544285	157544306	+	21	-0.0880612	0.454077	0.975205	maintain	5495	5287	4937	4487	3046	3378	3191	4944	4761.89	4424.26	3876.05	4386.57	4014.64	3541.93	4031.94	4824.71
mmu-miR-142a-3p	chr11	87756903	87756925	+	22	-0.0889056	0.850552	0.975205	maintain	14	12	19	27	20	12	9	10	12.1322	10.0418	14.9169	26.3957	26.3601	12.5823	11.3718	9.75872
mmu-miR-3969	chr5	87595963	87595982	-	19	-0.0911767	0.4053	0.975205	maintain	690	838	861	697	496	571	550	564	597.944	701.254	675.973	681.4	653.731	598.71	694.944	550.392
mmu-miR-3076-3p	chr14	30572185	30572207	+	22	-0.0912849	0.861355	0.975205	maintain	5	13	13	13	11	6	6	8	4.33293	10.8786	10.2063	12.709	14.4981	6.29117	7.58121	7.80698
mmu-miR-144-5p	chr11	78073010	78073032	+	22	-0.0913703	0.899498	0.975205	maintain	1075	674	613	810	318	145	275	1721	931.58	564.016	481.268	791.871	419.126	152.037	347.472	1679.48
mmu-miR-218-5p	chr11;chr5	35616840;48223966	35616860;48223986	+;+	20;20	-0.0916959	0.551094	0.975205	maintain	531	636	624	445	388	388	276	545	460.157	532.216	489.904	435.04	511.386	406.829	348.735	531.85
mmu-miR-1198-5p	chrX	7807142	7807163	+	21	-0.091855	0.495038	0.975205	maintain	7242	10442	11009	9494	6554	6978	5871	7721	6275.82	8738.06	8643.19	9281.51	8638.21	7316.63	7418.21	7534.71
mmu-miR-1843a-3p	chr12	80391615	80391636	-	21	-0.0923101	0.484864	0.975205	maintain	243	297	289	256	170	240	158	207	210.58	248.535	226.895	250.27	224.061	251.647	199.638	202.006
mmu-miR-139-5p	chr7	101475382	101475403	+	21	-0.0940376	0.435677	0.975205	maintain	23295	27592	30225	23153	18098	21304	13430	21339	20187.1	23089.5	23729.7	22634.8	23853.3	22337.9	16969.3	20824.1
mmu-miR-6541	chr14	62865610	62865630	+	20	-0.0942592	0.89892	0.975205	maintain	11	8	4	2	4	8	1	5	9.53245	6.69455	3.14041	1.95524	5.27202	8.38823	1.26353	4.87936
mmu-miR-8115	chr5	122682664	122682685	+	21	-0.0952131	0.866632	0.975205	maintain	11	13	5	25	12	7	10	10	9.53245	10.8786	3.92551	24.4405	15.8161	7.3397	12.6353	9.75872
mmu-miR-19b-3p	chr14;chrX	115044358;52741991	115044380;52742013	+;-	22;22	-0.0965797	0.534268	0.975205	maintain	5494	5028	3965	3652	2327	3401	2964	4363	4761.02	4207.52	3112.93	3570.26	3067	3566.05	3745.12	4257.73
mmu-miR-5113	chr15	80940049	80940071	+	22	-0.096612	0.597987	0.975205	maintain	102	89	114	86	46	78	69	86	88.3918	74.4768	89.5017	84.0752	60.6283	81.7852	87.1839	83.925
mmu-miR-493-5p	chr12	109580243	109580261	+	18	-0.0985756	0.961007	0.982718	maintain	1	2	0	0	1	0	1	0	0.866586	1.67364	0	0	1.31801	0	1.26353	0
mmu-miR-467d-5p	chr2	10507640	10507661	+	21	-0.100041	0.532354	0.975205	maintain	509	522	522	397	294	479	299	304	441.092	436.819	409.823	388.114	387.494	502.245	377.797	296.665
mmu-miR-1968-3p	chr8	13189035	13189055	-	20	-0.100401	0.862721	0.975205	maintain	8	14	8	20	16	7	6	6	6.93269	11.7155	6.28082	19.5524	21.0881	7.3397	7.58121	5.85523
mmu-miR-7666-3p	chr8	40307875	40307893	-	18	-0.102171	0.869416	0.975205	maintain	9	6	8	5	1	7	6	6	7.79927	5.02091	6.28082	4.88809	1.31801	7.3397	7.58121	5.85523
mmu-miR-10a-5p	chr11	96317186	96317208	+	22	-0.108059	0.285569	0.975205	maintain	32497	34467	37749	24136	19744	26307	20110	23844	28161.4	28842.6	29636.8	23595.8	26022.7	27583.6	25409.7	23268.7
mmu-miR-126b-3p	chr2	26591363	26591385	-	22	-0.112988	0.895792	0.975205	maintain	4	2	4	3	2	3	3	1	3.46634	1.67364	3.14041	2.93286	2.63601	3.14559	3.7906	0.975872
mmu-miR-6952-3p	chr15	76064828	76064849	-	21	-0.114316	0.809699	0.975205	maintain	14	16	11	17	9	14	3	16	12.1322	13.3891	8.63612	16.6195	11.862	14.6794	3.7906	15.614
mmu-miR-140-5p	chr8	107551249	107551270	+	21	-0.116924	0.144181	0.975205	maintain	4591	4818	4664	4027	2560	3258	2942	3979	3978.5	4031.79	3661.72	3936.87	3374.09	3416.11	3717.32	3883
mmu-miR-196b-5p	chr6	52230129	52230150	-	21	-0.117413	0.565816	0.975205	maintain	144	155	163	121	110	94	62	143	124.788	129.707	127.972	118.292	144.981	98.5617	78.3391	139.55
mmu-miR-182-5p	chr6	30165962	30165986	-	24	-0.117774	0.202173	0.975205	maintain	1318	1390	1294	1256	791	1059	833	1010	1142.16	1163.18	1015.92	1227.89	1042.54	1110.39	1052.52	985.631
mmu-miR-501-5p	chrX	7241307	7241328	-	21	-0.118543	0.795079	0.975205	maintain	19	16	23	7	13	13	11	7	16.4651	13.3891	18.0574	6.84333	17.1341	13.6309	13.8989	6.83111
mmu-miR-339-3p	chr5	139369673	139369695	-	22	-0.120203	0.316182	0.975205	maintain	297	304	375	297	173	263	204	252	257.376	254.393	294.413	290.353	228.015	275.763	257.761	245.92
mmu-miR-669a-5p	chr2;chr2;chr2;chr2;chr2;chr2;chr2;chr2;chr2;chr2;chr2;chr2	10474460;10476872;10479330;10481776;10484211;10486668;10491581;10494043;10498926;10501354;10503806;10510185	10474483;10476895;10479353;10481799;10484234;10486691;10491604;10494066;10498949;10501377;10503829;10510208	+;+;+;+;+;+;+;+;+;+;+;+	23;23;23;23;23;23;23;23;23;23;23;23	-0.120233	0.263791	0.975205	maintain	8412	7428	8652	6408	5304	6036	4428	5664	7289.72	6215.89	6792.7	6264.58	6990.7	6328.92	5594.93	5527.34
mmu-miR-669p-5p	chr2;chr2	10489130;10496511	10489153;10496534	+;+	23;23	-0.121038	0.276718	0.975205	maintain	1402	1238	1442	1068	884	1006	738	944	1214.95	1035.98	1132.12	1044.1	1165.12	1054.82	932.488	921.223
mmu-miR-351-5p	chrX	53053315	53053338	-	23	-0.122685	0.291929	0.975205	maintain	472	548	621	450	285	453	322	400	409.029	458.576	487.549	439.928	375.632	474.983	406.858	390.349
mmu-miR-32-3p	chr4	56895232	56895252	-	20	-0.123193	0.609525	0.975205	maintain	123	140	110	74	48	87	60	122	106.59	117.155	86.3612	72.3438	63.2643	91.222	75.8121	119.056
mmu-miR-27b-3p	chr13	63300760	63300780	+	20	-0.124839	0.100755	0.975205	maintain	123744	136593	141738	116241	79113	102790	83488	94184	107235	114304	111279	113639	104271	107778	105490	91911.5
mmu-miR-669o-5p	chr2	10514318	10514340	+	22	-0.124845	0.237708	0.975205	maintain	682	601	694	523	401	496	351	492	591.012	502.928	544.861	511.294	528.52	520.07	443.501	480.129
mmu-miR-7021-5p	chr4	143136136	143136157	-	21	-0.127112	0.803162	0.975205	maintain	13	10	24	14	5	22	7	9	11.2656	8.36818	18.8425	13.6867	6.59003	23.0676	8.84474	8.78285
mmu-miR-124-5p	chr14;chr2;chr3	64590670;180894045;17795686	64590691;180894066;17795707	+;+;+	21;21;21	-0.128044	0.898945	0.975205	maintain	2	6	2	2	4	0	2	2	1.73317	5.02091	1.5702	1.95524	5.27202	0	2.52707	1.95174
mmu-miR-142a-5p	chr11	87756867	87756887	+	20	-0.129149	0.126209	0.975205	maintain	323081	364288	379852	334383	215377	256837	235761	261589	279977	304843	298223	326899	283868	269301	297892	255277
mmu-let-7b-3p	chr15	85707379	85707400	+	21	-0.130016	0.503688	0.975205	maintain	109	132	107	112	80	101	64	74	94.4579	110.46	84.0059	109.493	105.44	105.901	80.8662	72.2145
mmu-miR-342-3p	chr12	108658680	108658702	+	22	-0.133023	0.111515	0.975205	maintain	13616	12489	16130	12340	8516	9866	8254	11111	11799.4	10451	12663.7	12063.8	11224.1	10344.8	10429.2	10842.9
mmu-miR-27a-3p	chr8	84208727	84208747	+	20	-0.133034	0.0892051	0.968598	maintain	121732	134697	139636	114578	77843	100784	81839	91640	105491	112717	109629	112014	102598	105675	103406	89428.9
mmu-miR-874-3p	chr13	58023135	58023156	-	21	-0.139104	0.529266	0.975205	maintain	74	79	101	87	60	76	48	50	64.1274	66.1087	79.2953	85.0528	79.0803	79.6882	60.6497	48.7936
mmu-miR-34c-3p	chr9	51103044	51103065	-	21	-0.139132	0.865369	0.975205	maintain	3	5	6	7	4	0	7	3	2.59976	4.18409	4.71061	6.84333	5.27202	0	8.84474	2.92762
mmu-miR-450a-5p	chrX;chrX	53048206;53048339	53048227;53048360	-;-	21;21	-0.14233	0.0933234	0.969042	maintain	1438	1456	1552	1208	766	1152	840	1152	1246.15	1218.41	1218.48	1180.96	1009.59	1207.9	1061.37	1124.2
mmu-miR-669f-5p	chr2	10467248	10467271	+	23	-0.142985	0.240587	0.975205	maintain	544	481	559	387	310	396	263	385	471.423	402.51	438.872	378.338	408.582	415.217	332.31	375.711
mmu-miR-5624-3p	chr13	93790816	93790837	+	21	-0.14578	0.818158	0.975205	maintain	7	10	5	13	6	10	1	8	6.0661	8.36818	3.92551	12.709	7.90803	10.4853	1.26353	7.80698
mmu-miR-5624-5p	chr13	93790777	93790794	+	17	-0.14578	0.818158	0.975205	maintain	7	10	5	13	6	10	1	8	6.0661	8.36818	3.92551	12.709	7.90803	10.4853	1.26353	7.80698
mmu-miR-467c-5p	chr2	10473941	10473962	+	21	-0.148274	0.250065	0.975205	maintain	1227	1362	1483	1170	835	1145	752	841	1063.3	1139.75	1164.31	1143.81	1100.53	1200.57	950.178	820.709
mmu-miR-6994-3p	chr19	11923778	11923798	+	20	-0.15062	0.819136	0.975205	maintain	11	6	8	5	5	4	1	11	9.53245	5.02091	6.28082	4.88809	6.59003	4.19411	1.26353	10.7346
mmu-miR-26a-5p	chr10;chr9	126995543;119031811	126995564;119031832	+;+	21;21	-0.151511	0.109142	0.975205	maintain	717999	775040	806528	747715	413164	615140	494968	571099	622208	648568	633207	730980	544552	644992	625409	557320
mmu-miR-378a-5p	chr18	61397875	61397896	-	21	-0.152855	0.267023	0.975205	maintain	691	788	779	711	521	573	450	465	598.811	659.413	611.595	695.087	686.681	600.807	568.59	453.781
mmu-miR-30a-3p	chr1	23272315	23272336	+	21	-0.156869	0.053973	0.735515	maintain	13576	15994	16939	14575	8652	11657	9501	11922	11764.8	13384.1	13298.8	14248.8	11403.4	12222.7	12004.8	11634.3
mmu-miR-669m-3p	chr2;chr2	10512847;10513490	10512868;10513511	+;+	21;21	-0.156943	0.811922	0.975205	maintain	6	8	6	4	4	2	6	4	5.19952	6.69455	4.71061	3.91047	5.27202	2.09706	7.58121	3.90349
mmu-miR-124-3p	chr14;chr2;chr3	64590709;180894083;17795723	64590728;180894102;17795742	+;+;+	19;19;19	-0.158353	0.813856	0.975205	maintain	6	36	38	12	30	4	9	15	5.19952	30.1255	29.8339	11.7314	39.5402	4.19411	11.3718	14.6381
mmu-miR-5130	chr14	102982608	102982631	-	23	-0.158534	0.810529	0.975205	maintain	7	7	7	4	5	7	1	4	6.0661	5.85773	5.49572	3.91047	6.59003	7.3397	1.26353	3.90349
mmu-miR-6996-5p	chr2	26470094	26470114	-	20	-0.159986	0.900216	0.975205	maintain	0	1	6	2	1	0	2	3	0	0.836818	4.71061	1.95524	1.31801	0	2.52707	2.92762
mmu-miR-3058-5p	chr10	95559286	95559308	-	22	-0.160481	0.860602	0.975205	maintain	1	2	4	9	3	4	3	1	0.866586	1.67364	3.14041	8.79857	3.95402	4.19411	3.7906	0.975872
mmu-miR-669h-5p	chr2	10518174	10518197	+	23	-0.161504	0.627893	0.975205	maintain	21	32	28	28	14	26	19	15	18.1983	26.7782	21.9829	27.3733	18.4521	27.2617	24.0072	14.6381
mmu-miR-200b-3p	chr4	156055685	156055706	-	21	-0.16197	0.42555	0.975205	maintain	1341	2212	1815	2117	1180	1434	1347	1083	1162.09	1851.04	1424.96	2069.62	1555.25	1503.59	1701.98	1056.87
mmu-miR-7001-3p	chr2	93421929	93421948	-	19	-0.162153	0.845956	0.975205	maintain	3	1	8	6	5	2	2	3	2.59976	0.836818	6.28082	5.86571	6.59003	2.09706	2.52707	2.92762
mmu-miR-1968-5p	chr8	13189068	13189091	-	23	-0.164424	0.713441	0.975205	maintain	14	27	13	31	19	12	11	16	12.1322	22.5941	10.2063	30.3062	25.0421	12.5823	13.8989	15.614
mmu-miR-322-3p	chrX	53054269	53054289	-	20	-0.165288	0.169635	0.975205	maintain	518	571	623	510	261	450	353	453	448.892	477.823	489.119	498.585	343.999	471.838	446.028	442.07
mmu-miR-466c-5p	chr2;chr2;chr2	10481544;10483979;10491349	10481567;10484002;10491372	+;+;+	23;23;23	-0.166217	0.349793	0.975205	maintain	318	297	282	171	177	204	150	183	275.574	248.535	221.399	167.173	233.287	213.9	189.53	178.585
mmu-miR-30d-3p	chr15	68341217	68341238	-	21	-0.166355	0.171124	0.975205	maintain	463	419	446	362	225	276	292	351	401.229	350.627	350.156	353.898	296.551	289.394	368.952	342.531
mmu-miR-341-3p	chr12	109611556	109611576	+	20	-0.168533	0.875943	0.975205	maintain	1	3	6	1	3	0	2	2	0.866586	2.51046	4.71061	0.977618	3.95402	0	2.52707	1.95174
mmu-miR-5133	chr9	62122565	62122585	-	20	-0.172083	0.601916	0.975205	maintain	27	36	27	22	16	13	22	24	23.3978	30.1255	21.1978	21.5076	21.0881	13.6309	27.7978	23.4209
mmu-miR-6960-5p	chr15	99080810	99080831	+	21	-0.173979	0.821081	0.975205	maintain	13	3	6	5	2	2	3	12	11.2656	2.51046	4.71061	4.88809	2.63601	2.09706	3.7906	11.7105
mmu-miR-744-5p	chr11	65734799	65734820	-	21	-0.174697	0.152218	0.975205	maintain	6425	5948	6957	5298	2936	5190	4055	4441	5567.81	4977.4	5461.96	5179.42	3869.66	5441.86	5123.63	4333.85
mmu-miR-1198-3p	chrX	7807180	7807201	+	21	-0.176892	0.574504	0.975205	maintain	34	30	30	27	10	27	22	23	29.4639	25.1046	23.5531	26.3957	13.1801	28.3103	27.7978	22.4451
mmu-miR-330-3p	chr7	19181525	19181547	+	22	-0.18042	0.381827	0.975205	maintain	127	186	153	171	111	131	88	96	110.056	155.648	120.121	167.173	146.299	137.357	111.191	93.6837
mmu-miR-1932	chr11	119390524	119390545	+	21	-0.18246	0.794117	0.975205	maintain	2	6	10	8	7	4	3	3	1.73317	5.02091	7.85102	7.82095	9.22604	4.19411	3.7906	2.92762
mmu-miR-25-5p	chr5	138165370	138165391	-	21	-0.182656	0.27637	0.975205	maintain	301	338	405	343	143	261	245	288	260.842	282.845	317.966	335.323	188.475	273.666	309.566	281.051
mmu-let-7f-1-3p	chr13	48537833	48537854	-	21	-0.183865	0.159203	0.975205	maintain	298	325	298	292	189	236	183	202	258.243	271.966	233.96	285.465	249.103	247.453	231.227	197.126
mmu-miR-150-3p	chr7	45121798	45121819	+	21	-0.183919	0.209069	0.975205	maintain	4125	5612	4909	4647	3114	3828	2948	2902	3574.67	4696.22	3854.07	4542.99	4104.27	4013.77	3724.9	2831.98
mmu-miR-191-3p	chr9	108568367	108568388	+	21	-0.185404	0.14446	0.975205	maintain	372	416	540	360	233	337	248	306	322.37	348.116	423.955	351.943	307.095	353.354	313.357	298.617
mmu-miR-132-5p	chr11	75173686	75173707	+	21	-0.186861	0.310299	0.975205	maintain	154	213	248	160	112	168	89	149	133.454	178.242	194.705	156.419	147.617	176.153	112.455	145.405
mmu-miR-7073-5p	chr8	95753188	95753209	-	21	-0.188788	0.751212	0.975205	maintain	9	6	13	6	2	5	5	11	7.79927	5.02091	10.2063	5.86571	2.63601	5.24264	6.31767	10.7346
mmu-miR-3103-5p	chr7	128288414	128288434	-	20	-0.193293	0.880242	0.975205	maintain	1	1	2	2	0	1	2	1	0.866586	0.836818	1.5702	1.95524	0	1.04853	2.52707	0.975872
mmu-miR-6516-5p	chr11	117077370	117077391	+	21	-0.19968	0.469042	0.975205	maintain	36	43	48	31	26	20	22	36	31.1971	35.9832	37.6849	30.3062	34.2681	20.9706	27.7978	35.1314
mmu-miR-92a-3p	chr14;chrX	115044476;52741854	115044496;52741874	+;-	20;20	-0.202166	0.0834998	0.959213	maintain	156913	207907	220677	171094	120764	137128	109435	127273	135979	173980	173254	167265	159168	143783	138275	124202
mmu-miR-466c-3p	chr2;chr2;chr2	10481585;10484020;10491390	10481606;10484041;10491411	+;+;+	21;21;21	-0.205558	0.0941229	0.969042	maintain	1266	1224	1488	1179	765	852	903	834	1097.1	1024.27	1168.23	1152.61	1008.27	893.346	1140.97	813.877
mmu-miR-466b-3p	chr2;chr2;chr2;chr2;chr2;chr2;chr2;chr2	10474269;10476681;10486477;10488939;10493852;10496320;10498735;10503615	10474290;10476702;10486498;10488960;10493873;10496341;10498756;10503636	+;+;+;+;+;+;+;+	21;21;21;21;21;21;21;21	-0.206185	0.0907428	0.968598	maintain	3073	2989	3634	2872	1866	2065	2205	2026	2663.02	2501.25	2853.06	2807.72	2459.4	2165.21	2786.09	1977.12
mmu-miR-181b-1-3p	chr1	137966690	137966710	+	20	-0.206383	0.434228	0.975205	maintain	43	37	58	44	19	36	26	40	37.2632	30.9623	45.5359	43.0152	25.0421	37.747	32.8519	39.0349
mmu-miR-466a-3p	chr2	10507967	10507989	+	22	-0.208016	0.113504	0.975205	maintain	422	408	496	393	255	284	301	278	365.699	341.422	389.411	384.204	336.091	297.782	380.324	271.292
mmu-miR-466e-3p	chr2	10479138	10479160	+	22	-0.208016	0.113504	0.975205	maintain	422	408	496	393	255	284	301	278	365.699	341.422	389.411	384.204	336.091	297.782	380.324	271.292
mmu-miR-466p-3p	chr2	10506059	10506080	+	21	-0.208016	0.113504	0.975205	maintain	422	408	496	393	255	284	301	278	365.699	341.422	389.411	384.204	336.091	297.782	380.324	271.292
mmu-miR-3618-3p	chr16	18284562	18284583	-	21	-0.20926	0.863116	0.975205	maintain	3	7	0	1	2	3	2	0	2.59976	5.85773	0	0.977618	2.63601	3.14559	2.52707	0
mmu-miR-466d-3p	chr2	10512017	10512037	+	20	-0.213982	0.0915787	0.968598	maintain	296	274	320	253	168	195	191	189	256.509	229.288	251.233	247.337	221.425	204.463	241.335	184.44
mmu-miR-450b-3p	chrX	53048008	53048029	-	21	-0.215355	0.230914	0.975205	maintain	98	119	118	104	47	83	72	87	84.9254	99.5814	92.6421	101.672	61.9463	87.0279	90.9745	84.9009
mmu-miR-425-5p	chr9	108568789	108568811	+	22	-0.216199	0.0414219	0.625832	maintain	6823	6331	7149	5458	3505	4713	3222	5573	5912.72	5297.9	5612.7	5335.84	4619.61	4941.72	4071.11	5438.54
mmu-miR-183-5p	chr6	30169711	30169732	-	21	-0.216826	0.110056	0.975205	maintain	659	888	748	717	438	615	417	502	571.08	743.095	587.256	700.952	577.286	644.845	526.894	489.888
mmu-miR-6943-3p	chr13	55453150	55453171	+	21	-0.217132	0.474329	0.975205	maintain	27	31	27	25	15	18	17	22	23.3978	25.9414	21.1978	24.4405	19.7701	18.8735	21.4801	21.4692
mmu-miR-7672-3p	chr14	26669547	26669567	-	20	-0.217606	0.809038	0.975205	maintain	8	2	2	3	2	5	1	2	6.93269	1.67364	1.5702	2.93286	2.63601	5.24264	1.26353	1.95174
mmu-miR-5114	chr19	44303171	44303192	+	21	-0.218629	0.365551	0.975205	maintain	45	56	55	51	37	37	24	37	38.9964	46.8618	43.1806	49.8585	48.7662	38.7956	30.3248	36.1073
mmu-miR-28a-5p	chr16	24827868	24827889	+	21	-0.22226	0.0395848	0.611366	maintain	2495	2568	2623	2063	1307	1881	1193	2032	2162.13	2148.95	2059.32	2016.83	1722.63	1972.28	1507.4	1982.97
mmu-miR-1955-5p	chr2	92191994	92192018	+	24	-0.22312	0.443231	0.975205	maintain	36	33	33	25	17	26	15	25	31.1971	27.615	25.9084	24.4405	22.4061	27.2617	18.953	24.3968
mmu-miR-211-3p	chr7	64205868	64205888	+	20	-0.223738	0.770128	0.975205	maintain	4	6	7	5	6	6	1	1	3.46634	5.02091	5.49572	4.88809	7.90803	6.29117	1.26353	0.975872
mmu-miR-503-3p	chrX	53053987	53054008	-	21	-0.224214	0.213416	0.975205	maintain	123	123	144	141	91	79	79	95	106.59	102.929	113.055	137.844	119.939	82.8338	99.8192	92.7079
mmu-let-7d-3p	chr13	48536024	48536045	-	21	-0.224672	0.0698339	0.844079	maintain	5887	7469	7859	7702	4095	5452	4035	5354	5101.59	6250.2	6170.12	7529.62	5397.23	5716.58	5098.36	5224.82
mmu-miR-363-5p	chrX	52741740	52741761	-	21	-0.224923	0.15222	0.975205	maintain	159	157	181	161	74	114	111	131	137.787	131.38	142.104	157.397	97.5324	119.532	140.252	127.839
mmu-miR-666-5p	chr12	109717103	109717124	+	21	-0.227262	0.923447	0.975205	maintain	3	0	0	0	0	1	0	1	2.59976	0	0	0	0	1.04853	0	0.975872
mmu-miR-3094-5p	chr4	40993696	40993716	+	20	-0.228469	0.835088	0.975205	maintain	3	1	2	3	2	1	0	3	2.59976	0.836818	1.5702	2.93286	2.63601	1.04853	0	2.92762
mmu-miR-1958	chr4	48213134	48213155	-	21	-0.230764	0.604626	0.975205	maintain	17	24	18	13	6	8	19	13	14.732	20.0836	14.1318	12.709	7.90803	8.38823	24.0072	12.6863
mmu-miR-365-3p	chr11;chr16	79726467;13453895	79726488;13453916	+;+	21;21	-0.230787	0.385338	0.975205	maintain	58	38	52	56	30	38	34	30	50.262	31.7991	40.8253	54.7466	39.5402	39.8441	42.9602	29.2762
mmu-miR-7677-3p	chr17	27091289	27091311	+	22	-0.233151	0.832627	0.975205	maintain	0	2	7	6	1	7	1	1	0	1.67364	5.49572	5.86571	1.31801	7.3397	1.26353	0.975872
mmu-miR-186-3p	chr3	157544324	157544345	+	21	-0.234133	0.744518	0.975205	maintain	4	4	7	5	1	4	4	4	3.46634	3.34727	5.49572	4.88809	1.31801	4.19411	5.05414	3.90349
mmu-miR-8118	chr4	33438153	33438174	+	21	-0.235597	0.596054	0.975205	maintain	13	14	18	16	12	14	7	6	11.2656	11.7155	14.1318	15.6419	15.8161	14.6794	8.84474	5.85523
mmu-miR-30c-5p	chr1;chr4	23291714;120769584	23291736;120769606	+;-	22;22	-0.241077	0.00672128	0.245857	maintain	93320	105902	95250	92385	54195	69296	51938	75197	80869.8	88620.7	74781	90317.3	71429.3	72658.8	65625.5	73382.7
mmu-miR-1954	chr2	32652342	32652362	+	20	-0.241655	0.892786	0.975205	maintain	2	0	3	0	0	1	2	0	1.73317	0	2.35531	0	0	1.04853	2.52707	0
mmu-miR-6395	chr8	34166689	34166710	-	21	-0.242879	0.327472	0.975205	maintain	41	52	48	41	29	29	29	29	35.53	43.5146	37.6849	40.0824	38.2222	30.4073	36.6425	28.3003
mmu-miR-7054-3p	chr7	45012426	45012445	-	19	-0.242999	0.904038	0.975205	maintain	0	0	1	2	1	0	0	1	0	0	0.785102	1.95524	1.31801	0	0	0.975872
mmu-miR-501-3p	chrX	7241270	7241291	-	21	-0.248024	0.0533171	0.735515	maintain	1307	1477	1902	1411	883	1200	772	1041	1132.63	1235.98	1493.26	1379.42	1163.8	1258.23	975.449	1015.88
mmu-miR-652-5p	chrX	142739020	142739043	+	23	-0.248093	0.715753	0.975205	maintain	7	7	4	5	3	3	2	7	6.0661	5.85773	3.14041	4.88809	3.95402	3.14559	2.52707	6.83111
mmu-miR-331-3p	chr10	93963783	93963803	-	20	-0.250433	0.154041	0.975205	maintain	151	180	154	139	75	95	85	148	130.854	150.627	120.906	135.889	98.8504	99.6102	107.4	144.429
mmu-miR-151-3p	chr15	73254820	73254840	-	20	-0.252281	0.0947136	0.969042	maintain	5852	8429	8674	8121	5036	4819	4241	5651	5071.26	7053.54	6809.98	7939.24	6637.48	5052.86	5358.65	5514.65
mmu-miR-3077-3p	chr14	57798466	57798487	+	21	-0.25794	0.724568	0.975205	maintain	7	6	6	4	7	3	3	1	6.0661	5.02091	4.71061	3.91047	9.22604	3.14559	3.7906	0.975872
mmu-miR-5131	chr14	45657972	45657994	-	22	-0.25858	0.526237	0.975205	maintain	12	15	27	22	12	14	11	11	10.399	12.5523	21.1978	21.5076	15.8161	14.6794	13.8989	10.7346
mmu-miR-132-3p	chr11	75173723	75173744	+	21	-0.260222	0.0205641	0.397002	maintain	725	937	986	818	457	652	470	627	628.275	784.099	774.111	799.692	602.329	683.641	593.861	611.872
mmu-miR-3079-5p	chr15	76290932	76290954	-	22	-0.260353	0.539462	0.975205	maintain	20	13	20	22	5	14	10	20	17.3317	10.8786	15.702	21.5076	6.59003	14.6794	12.6353	19.5174
mmu-miR-450a-1-3p	chrX	53048171	53048192	-	21	-0.261036	0.175183	0.975205	maintain	88	101	105	85	37	75	57	73	76.2596	84.5187	82.4357	83.0976	48.7662	78.6396	72.0215	71.2387
mmu-miR-326-3p	chr7	99552328	99552348	+	20	-0.261483	0.170177	0.975205	maintain	265	233	308	239	159	172	99	240	229.645	194.979	241.811	233.651	209.563	180.347	125.09	234.209
mmu-miR-8103	chr11	97063829	97063849	+	20	-0.262901	0.548211	0.975205	maintain	17	22	15	26	17	17	6	11	14.732	18.41	11.7765	25.4181	22.4061	17.825	7.58121	10.7346
mmu-miR-434-5p	chr12	109594528	109594549	+	21	-0.264947	0.445502	0.975205	maintain	19	43	34	24	21	22	14	18	16.4651	35.9832	26.6935	23.4628	27.6781	23.0676	17.6895	17.5657
mmu-miR-877-5p	chr17	35960795	35960814	-	19	-0.266102	0.449854	0.975205	maintain	32	36	26	33	23	13	13	32	27.7308	30.1255	20.4127	32.2614	30.3141	13.6309	16.4259	31.2279
mmu-miR-301a-5p	chr11	87113017	87113038	+	21	-0.266393	0.14379	0.975205	maintain	156	138	187	136	59	123	92	119	135.187	115.481	146.814	132.956	77.7623	128.969	116.245	116.129
mmu-miR-7085-5p	chr9	44400428	44400449	+	21	-0.267093	0.933449	0.975205	maintain	0	0	2	0	0	0	0	1	0	0	1.5702	0	0	0	0	0.975872
mmu-miR-384-5p	chrX	105344332	105344354	-	22	-0.267228	0.93284	0.975205	maintain	0	0	2	0	0	1	0	0	0	0	1.5702	0	0	1.04853	0	0
mmu-miR-5623-3p	chr19	58051215	58051236	+	21	-0.267228	0.93284	0.975205	maintain	0	0	2	0	0	1	0	0	0	0	1.5702	0	0	1.04853	0	0
mmu-miR-6989-5p	chr19	6346485	6346506	+	21	-0.267228	0.93284	0.975205	maintain	0	0	2	0	0	1	0	0	0	0	1.5702	0	0	1.04853	0	0
mmu-miR-7008-5p	chr3	31038971	31038994	+	23	-0.267618	0.931111	0.975205	maintain	0	0	2	0	0	0	1	0	0	0	1.5702	0	0	0	1.26353	0
mmu-miR-6911-3p	chr10	80278212	80278232	+	20	-0.26996	0.381026	0.975205	maintain	46	42	60	52	29	47	30	19	39.863	35.1464	47.1061	50.8362	38.2222	49.2808	37.906	18.5416
mmu-miR-7042-3p	chr6	113707245	113707265	+	20	-0.271681	0.738157	0.975205	maintain	4	7	2	4	2	3	1	5	3.46634	5.85773	1.5702	3.91047	2.63601	3.14559	1.26353	4.87936
mmu-miR-466f-5p	chr2;chr2;chr2	10466954;10468685;10471963	10466975;10468706;10471984	+;+;+	21;21;21	-0.272035	0.642391	0.975205	maintain	6	15	6	15	3	6	9	9	5.19952	12.5523	4.71061	14.6643	3.95402	6.29117	11.3718	8.78285
mmu-miR-1961	chr5	92788465	92788481	-	16	-0.274027	0.26619	0.975205	maintain	66	86	123	107	47	65	44	88	57.1947	71.9664	96.5676	104.605	61.9463	68.1544	55.5955	85.8768
mmu-miR-3098-3p	chr6	125195845	125195865	+	20	-0.274049	0.569994	0.975205	maintain	12	12	12	9	6	9	8	5	10.399	10.0418	9.42123	8.79857	7.90803	9.43676	10.1083	4.87936
mmu-miR-7036a-3p	chr5	137296624	137296646	-	22	-0.275627	0.905041	0.975205	maintain	0	1	0	2	0	2	0	0	0	0.836818	0	1.95524	0	2.09706	0	0
mmu-miR-5128	chr2	37688212	37688234	-	22	-0.2765	0.709083	0.975205	maintain	4	8	5	6	3	3	7	1	3.46634	6.69455	3.92551	5.86571	3.95402	3.14559	8.84474	0.975872
mmu-miR-6932-3p	chr11	107637759	107637779	+	20	-0.278645	0.700893	0.975205	maintain	4	8	3	11	4	6	1	6	3.46634	6.69455	2.35531	10.7538	5.27202	6.29117	1.26353	5.85523
mmu-miR-574-3p	chr5	64970364	64970385	+	21	-0.279247	0.537247	0.975205	maintain	9	16	24	11	8	8	10	11	7.79927	13.3891	18.8425	10.7538	10.544	8.38823	12.6353	10.7346
mmu-miR-152-5p	chr11	96850400	96850423	+	23	-0.280015	0.583825	0.975205	maintain	7	12	18	14	10	8	3	11	6.0661	10.0418	14.1318	13.6867	13.1801	8.38823	3.7906	10.7346
mmu-miR-7015-3p	chr4	120973259	120973279	-	20	-0.280622	0.151611	0.975205	maintain	153	204	191	185	84	162	80	141	132.588	170.711	149.955	180.859	110.712	169.862	101.083	137.598
mmu-miR-693-3p	chr17	46231581	46231603	+	22	-0.291326	0.723188	0.975205	maintain	5	2	6	3	2	4	1	3	4.33293	1.67364	4.71061	2.93286	2.63601	4.19411	1.26353	2.92762
mmu-miR-12201-5p	chr6	99184999	99185019	-	20	-0.292828	0.792943	0.975205	maintain	5	0	6	1	3	1	2	1	4.33293	0	4.71061	0.977618	3.95402	1.04853	2.52707	0.975872
mmu-miR-7678-3p	chr2	164354313	164354334	-	21	-0.29315	0.81325	0.975205	maintain	1	1	3	4	0	4	0	2	0.866586	0.836818	2.35531	3.91047	0	4.19411	0	1.95174
mmu-miR-12202-3p	chr7	4918009	4918030	+	21	-0.294595	0.910922	0.975205	maintain	0	1	1	0	0	0	0	1	0	0.836818	0.785102	0	0	0	0	0.975872
mmu-miR-7069-5p	chr8	84867952	84867974	+	22	-0.294595	0.910922	0.975205	maintain	0	1	1	0	0	0	0	1	0	0.836818	0.785102	0	0	0	0	0.975872
mmu-miR-743a-3p	chrX	66776760	66776781	-	21	-0.294595	0.910922	0.975205	maintain	0	1	1	0	0	0	0	1	0	0.836818	0.785102	0	0	0	0	0.975872
mmu-miR-6954-5p	chr15	76433219	76433240	+	21	-0.29504	0.907892	0.975205	maintain	0	1	1	0	1	0	0	0	0	0.836818	0.785102	0	1.31801	0	0	0
mmu-miR-3097-3p	chr5	35021094	35021115	+	21	-0.298223	0.785884	0.975205	maintain	0	8	4	6	6	1	0	4	0	6.69455	3.14041	5.86571	7.90803	1.04853	0	3.90349
mmu-miR-7679-5p	chr11	82985046	82985065	-	19	-0.299687	0.812672	0.975205	maintain	2	2	0	4	1	2	2	0	1.73317	1.67364	0	3.91047	1.31801	2.09706	2.52707	0
mmu-miR-6928-3p	chr11	101030388	101030409	+	21	-0.301209	0.644785	0.975205	maintain	10	6	3	8	3	4	4	6	8.66586	5.02091	2.35531	7.82095	3.95402	4.19411	5.05414	5.85523
mmu-miR-7072-3p	chr8	94505085	94505105	+	20	-0.302689	0.907517	0.975205	maintain	1	0	1	0	0	1	0	0	0.866586	0	0.785102	0	0	1.04853	0	0
mmu-miR-3088-3p	chr2	28733321	28733343	+	22	-0.302719	0.907258	0.975205	maintain	0	0	1	1	0	0	0	1	0	0	0.785102	0.977618	0	0	0	0.975872
mmu-miR-6340	chr2	173701098	173701120	-	22	-0.302916	0.905603	0.975205	maintain	1	0	1	0	0	0	1	0	0.866586	0	0.785102	0	0	0	1.26353	0
mmu-miR-7082-3p	chr9	21075499	21075520	-	21	-0.302916	0.905603	0.975205	maintain	1	0	1	0	0	0	1	0	0.866586	0	0.785102	0	0	0	1.26353	0
mmu-miR-7053-3p	chr7	44538106	44538126	-	20	-0.303018	0.904759	0.975205	maintain	0	0	1	1	0	0	1	0	0	0	0.785102	0.977618	0	0	1.26353	0
mmu-miR-6988-3p	chr19	6051371	6051392	+	21	-0.304887	0.189188	0.975205	maintain	59	83	97	90	54	53	45	49	51.1286	69.4559	76.1549	87.9857	71.1723	55.572	56.859	47.8177
mmu-miR-6980-3p	chr18	37990887	37990906	-	19	-0.306934	0.808606	0.975205	maintain	0	6	4	1	0	1	1	5	0	5.02091	3.14041	0.977618	0	1.04853	1.26353	4.87936
mmu-miR-20b-3p	chrX	52742122	52742143	-	21	-0.307503	0.615704	0.975205	maintain	14	6	8	11	3	4	4	14	12.1322	5.02091	6.28082	10.7538	3.95402	4.19411	5.05414	13.6622
mmu-miR-301b-5p	chr16	17124456	17124477	-	21	-0.309123	0.41954	0.975205	maintain	28	18	28	19	11	16	7	24	24.2644	15.0627	21.9829	18.5747	14.4981	16.7765	8.84474	23.4209
mmu-miR-210-5p	chr7	141221445	141221466	-	21	-0.310755	0.687208	0.975205	maintain	6	9	3	4	6	3	3	1	5.19952	7.53137	2.35531	3.91047	7.90803	3.14559	3.7906	0.975872
mmu-miR-7065-3p	chr8	13136112	13136132	+	20	-0.314306	0.579109	0.975205	maintain	10	19	6	8	6	9	7	4	8.66586	15.8995	4.71061	7.82095	7.90803	9.43676	8.84474	3.90349
mmu-miR-1264-3p	chrX	147010655	147010676	+	21	-0.317792	0.928344	0.975205	maintain	0	1	0	0	0	0	0	0	0	0.836818	0	0	0	0	0	0
mmu-miR-1271-5p	chr13	54578152	54578173	+	21	-0.317792	0.928344	0.975205	maintain	0	1	0	0	0	0	0	0	0	0.836818	0	0	0	0	0	0
mmu-miR-1892	chr12	54645943	54645964	-	21	-0.317792	0.928344	0.975205	maintain	0	1	0	0	0	0	0	0	0	0.836818	0	0	0	0	0	0
mmu-miR-203b-3p	chr12	112130887	112130908	-	21	-0.317792	0.928344	0.975205	maintain	0	1	0	0	0	0	0	0	0	0.836818	0	0	0	0	0	0
mmu-miR-216a-3p	chr11	28757058	28757079	+	21	-0.317792	0.928344	0.975205	maintain	0	1	0	0	0	0	0	0	0	0.836818	0	0	0	0	0	0
mmu-miR-2861	chr2	32712819	32712837	-	18	-0.317792	0.928344	0.975205	maintain	0	1	0	0	0	0	0	0	0	0.836818	0	0	0	0	0	0
mmu-miR-302c-3p	chr3	127545406	127545427	+	21	-0.317792	0.928344	0.975205	maintain	0	1	0	0	0	0	0	0	0	0.836818	0	0	0	0	0	0
mmu-miR-374b-3p	chrX	103573075	103573096	-	21	-0.317792	0.928344	0.975205	maintain	0	1	0	0	0	0	0	0	0	0.836818	0	0	0	0	0	0
mmu-miR-448-3p	chrX	147158281	147158302	+	21	-0.317792	0.928344	0.975205	maintain	0	1	0	0	0	0	0	0	0	0.836818	0	0	0	0	0	0
mmu-miR-466a-5p	chr2	10507928	10507949	+	21	-0.317792	0.928344	0.975205	maintain	0	1	0	0	0	0	0	0	0	0.836818	0	0	0	0	0	0
mmu-miR-466p-5p	chr2	10506020	10506040	+	20	-0.317792	0.928344	0.975205	maintain	0	1	0	0	0	0	0	0	0	0.836818	0	0	0	0	0	0
mmu-miR-543-5p	chr12	109717269	109717289	+	20	-0.317792	0.928344	0.975205	maintain	0	1	0	0	0	0	0	0	0	0.836818	0	0	0	0	0	0
mmu-miR-6896-5p	chr1	34117364	34117385	+	21	-0.317792	0.928344	0.975205	maintain	0	1	0	0	0	0	0	0	0	0.836818	0	0	0	0	0	0
mmu-miR-6900-5p	chr1	92464514	92464537	-	23	-0.317792	0.928344	0.975205	maintain	0	1	0	0	0	0	0	0	0	0.836818	0	0	0	0	0	0
mmu-miR-6909-3p	chr10	79531029	79531050	-	21	-0.317792	0.928344	0.975205	maintain	0	1	0	0	0	0	0	0	0	0.836818	0	0	0	0	0	0
mmu-miR-6926-5p	chr11	74868168	74868189	-	21	-0.317792	0.928344	0.975205	maintain	0	1	0	0	0	0	0	0	0	0.836818	0	0	0	0	0	0
mmu-miR-6930-3p	chr11	102404920	102404940	-	20	-0.317792	0.928344	0.975205	maintain	0	1	0	0	0	0	0	0	0	0.836818	0	0	0	0	0	0
mmu-miR-6963-5p	chr15	103350497	103350520	-	23	-0.317792	0.928344	0.975205	maintain	0	1	0	0	0	0	0	0	0	0.836818	0	0	0	0	0	0
mmu-miR-6982-5p	chr18	60958078	60958102	+	24	-0.317792	0.928344	0.975205	maintain	0	1	0	0	0	0	0	0	0	0.836818	0	0	0	0	0	0
mmu-miR-6997-5p	chr2	29995955	29995976	+	21	-0.317792	0.928344	0.975205	maintain	0	1	0	0	0	0	0	0	0	0.836818	0	0	0	0	0	0
mmu-miR-7032-5p	chr5	123996857	123996882	+	25	-0.317792	0.928344	0.975205	maintain	0	1	0	0	0	0	0	0	0	0.836818	0	0	0	0	0	0
mmu-miR-7040-5p	chr6	83049716	83049737	+	21	-0.317792	0.928344	0.975205	maintain	0	1	0	0	0	0	0	0	0	0.836818	0	0	0	0	0	0
mmu-miR-705	chr6	85336341	85336360	-	19	-0.317792	0.928344	0.975205	maintain	0	1	0	0	0	0	0	0	0	0.836818	0	0	0	0	0	0
mmu-miR-7056-3p	chr7	47083166	47083187	-	21	-0.317792	0.928344	0.975205	maintain	0	1	0	0	0	0	0	0	0	0.836818	0	0	0	0	0	0
mmu-miR-7075-5p	chr8	107096081	107096101	-	20	-0.317792	0.928344	0.975205	maintain	0	1	0	0	0	0	0	0	0	0.836818	0	0	0	0	0	0
mmu-miR-7088-3p	chr9	108081560	108081581	+	21	-0.317792	0.928344	0.975205	maintain	0	1	0	0	0	0	0	0	0	0.836818	0	0	0	0	0	0
mmu-miR-709	chr8	84086167	84086185	+	18	-0.317792	0.928344	0.975205	maintain	0	1	0	0	0	0	0	0	0	0.836818	0	0	0	0	0	0
mmu-miR-7117-3p	chr15	27571539	27571558	+	19	-0.317792	0.928344	0.975205	maintain	0	1	0	0	0	0	0	0	0	0.836818	0	0	0	0	0	0
mmu-miR-7119-3p	chr4	126559898	126559918	+	20	-0.317792	0.928344	0.975205	maintain	0	1	0	0	0	0	0	0	0	0.836818	0	0	0	0	0	0
mmu-miR-7225-3p	chr3	97690509	97690530	-	21	-0.317792	0.928344	0.975205	maintain	0	1	0	0	0	0	0	0	0	0.836818	0	0	0	0	0	0
mmu-miR-7651-3p	chr11	6401670	6401693	+	23	-0.317792	0.928344	0.975205	maintain	0	1	0	0	0	0	0	0	0	0.836818	0	0	0	0	0	0
mmu-miR-7652-5p	chr11	55501226	55501247	+	21	-0.317792	0.928344	0.975205	maintain	0	1	0	0	0	0	0	0	0	0.836818	0	0	0	0	0	0
mmu-miR-876-3p	chr4	36645383	36645404	-	21	-0.317792	0.928344	0.975205	maintain	0	1	0	0	0	0	0	0	0	0.836818	0	0	0	0	0	0
mmu-miR-12203-3p	chr7	81613308	81613329	-	21	-0.317792	0.928344	0.975205	maintain	0	0	0	1	0	0	0	0	0	0	0	0.977618	0	0	0	0
mmu-miR-126a-3p	chr2	26591402	26591423	+	21	-0.317792	0.928344	0.975205	maintain	0	0	0	1	0	0	0	0	0	0	0	0.977618	0	0	0	0
mmu-miR-153-3p	chr12	117250860	117250881	+	21	-0.317792	0.928344	0.975205	maintain	0	0	0	1	0	0	0	0	0	0	0	0.977618	0	0	0	0
mmu-miR-194-1-3p	chr1	185313360	185313381	+	21	-0.317792	0.928344	0.975205	maintain	0	0	0	1	0	0	0	0	0	0	0	0.977618	0	0	0	0
mmu-miR-1982-5p	chr10	80828808	80828827	+	19	-0.317792	0.928344	0.975205	maintain	0	0	0	1	0	0	0	0	0	0	0	0.977618	0	0	0	0
mmu-miR-3063-3p	chr11	95963304	95963325	-	21	-0.317792	0.928344	0.975205	maintain	0	0	0	1	0	0	0	0	0	0	0	0.977618	0	0	0	0
mmu-miR-3099-5p	chr7	6803600	6803620	+	20	-0.317792	0.928344	0.975205	maintain	0	0	0	1	0	0	0	0	0	0	0	0.977618	0	0	0	0
mmu-miR-3100-5p	chr7	19086828	19086850	+	22	-0.317792	0.928344	0.975205	maintain	0	0	0	1	0	0	0	0	0	0	0	0.977618	0	0	0	0
mmu-miR-344f-3p	chr7	62046183	62046203	-	20	-0.317792	0.928344	0.975205	maintain	0	0	0	1	0	0	0	0	0	0	0	0.977618	0	0	0	0
mmu-miR-3473e	chr5	31667296	31667316	-	20	-0.317792	0.928344	0.975205	maintain	0	0	0	1	0	0	0	0	0	0	0	0.977618	0	0	0	0
mmu-miR-34b-5p	chr9	51103610	51103632	-	22	-0.317792	0.928344	0.975205	maintain	0	0	0	1	0	0	0	0	0	0	0	0.977618	0	0	0	0
mmu-miR-3966	chr10	97423493	97423513	+	20	-0.317792	0.928344	0.975205	maintain	0	0	0	1	0	0	0	0	0	0	0	0.977618	0	0	0	0
mmu-miR-467f	chr11	69635419	69635439	-	20	-0.317792	0.928344	0.975205	maintain	0	0	0	1	0	0	0	0	0	0	0	0.977618	0	0	0	0
mmu-miR-483-3p	chr7	142654932	142654952	-	20	-0.317792	0.928344	0.975205	maintain	0	0	0	1	0	0	0	0	0	0	0	0.977618	0	0	0	0
mmu-miR-5626-5p	chr9	70405732	70405753	-	21	-0.317792	0.928344	0.975205	maintain	0	0	0	1	0	0	0	0	0	0	0	0.977618	0	0	0	0
mmu-miR-6341	chr1	12426016	12426038	+	22	-0.317792	0.928344	0.975205	maintain	0	0	0	1	0	0	0	0	0	0	0	0.977618	0	0	0	0
mmu-miR-6353	chr1	84218926	84218948	-	22	-0.317792	0.928344	0.975205	maintain	0	0	0	1	0	0	0	0	0	0	0	0.977618	0	0	0	0
mmu-miR-6380	chr3	137783536	137783559	-	23	-0.317792	0.928344	0.975205	maintain	0	0	0	1	0	0	0	0	0	0	0	0.977618	0	0	0	0
mmu-miR-6393	chr15	87795919	87795940	-	21	-0.317792	0.928344	0.975205	maintain	0	0	0	1	0	0	0	0	0	0	0	0.977618	0	0	0	0
mmu-miR-6402	chr4	91373285	91373307	-	22	-0.317792	0.928344	0.975205	maintain	0	0	0	1	0	0	0	0	0	0	0	0.977618	0	0	0	0
mmu-miR-6907-5p	chr10	78408522	78408543	-	21	-0.317792	0.928344	0.975205	maintain	0	0	0	1	0	0	0	0	0	0	0	0.977618	0	0	0	0
mmu-miR-6926-3p	chr11	74868127	74868147	-	20	-0.317792	0.928344	0.975205	maintain	0	0	0	1	0	0	0	0	0	0	0	0.977618	0	0	0	0
mmu-miR-6958-5p	chr15	89185516	89185537	-	21	-0.317792	0.928344	0.975205	maintain	0	0	0	1	0	0	0	0	0	0	0	0.977618	0	0	0	0
mmu-miR-698-3p	chr4	124743852	124743870	+	18	-0.317792	0.928344	0.975205	maintain	0	0	0	1	0	0	0	0	0	0	0	0.977618	0	0	0	0
mmu-miR-6982-3p	chr18	60958120	60958140	+	20	-0.317792	0.928344	0.975205	maintain	0	0	0	1	0	0	0	0	0	0	0	0.977618	0	0	0	0
mmu-miR-7016-3p	chr4	129684500	129684521	-	21	-0.317792	0.928344	0.975205	maintain	0	0	0	1	0	0	0	0	0	0	0	0.977618	0	0	0	0
mmu-miR-7017-3p	chr4	133195696	133195716	+	20	-0.317792	0.928344	0.975205	maintain	0	0	0	1	0	0	0	0	0	0	0	0.977618	0	0	0	0
mmu-miR-7034-3p	chr5	135735807	135735830	-	23	-0.317792	0.928344	0.975205	maintain	0	0	0	1	0	0	0	0	0	0	0	0.977618	0	0	0	0
mmu-miR-7060-5p	chr7	127489251	127489272	+	21	-0.317792	0.928344	0.975205	maintain	0	0	0	1	0	0	0	0	0	0	0	0.977618	0	0	0	0
mmu-miR-741-5p	chrX	66796847	66796869	-	22	-0.317792	0.928344	0.975205	maintain	0	0	0	1	0	0	0	0	0	0	0	0.977618	0	0	0	0
mmu-miR-761	chr4	109017669	109017690	+	21	-0.317792	0.928344	0.975205	maintain	0	0	0	1	0	0	0	0	0	0	0	0.977618	0	0	0	0
mmu-miR-7660-5p	chr6	115775657	115775678	+	21	-0.317792	0.928344	0.975205	maintain	0	0	0	1	0	0	0	0	0	0	0	0.977618	0	0	0	0
mmu-miR-7680-3p	chr16	21256013	21256034	-	21	-0.317792	0.928344	0.975205	maintain	0	0	0	1	0	0	0	0	0	0	0	0.977618	0	0	0	0
mmu-miR-7680-5p	chr16	21256047	21256066	-	19	-0.317792	0.928344	0.975205	maintain	0	0	0	1	0	0	0	0	0	0	0	0.977618	0	0	0	0
mmu-miR-883b-5p	chrX	66789936	66789957	-	21	-0.317792	0.928344	0.975205	maintain	0	0	0	1	0	0	0	0	0	0	0	0.977618	0	0	0	0
mmu-miR-12184-5p	chr13	24980056	24980077	+	21	-0.317792	0.928344	0.975205	maintain	0	0	1	0	0	0	0	0	0	0	0.785102	0	0	0	0	0
mmu-miR-133b-5p	chr1	20682797	20682818	+	21	-0.317792	0.928344	0.975205	maintain	0	0	1	0	0	0	0	0	0	0	0.785102	0	0	0	0	0
mmu-miR-135b-3p	chr1	132198142	132198163	+	21	-0.317792	0.928344	0.975205	maintain	0	0	1	0	0	0	0	0	0	0	0.785102	0	0	0	0	0
mmu-miR-1897-5p	chr3	34638474	34638495	+	21	-0.317792	0.928344	0.975205	maintain	0	0	1	0	0	0	0	0	0	0	0.785102	0	0	0	0	0
mmu-miR-1898	chr15	12171502	12171523	+	21	-0.317792	0.928344	0.975205	maintain	0	0	1	0	0	0	0	0	0	0	0.785102	0	0	0	0	0
mmu-miR-1962	chr7	135566234	135566255	+	21	-0.317792	0.928344	0.975205	maintain	0	0	1	0	0	0	0	0	0	0	0.785102	0	0	0	0	0
mmu-miR-218-1-3p	chr5	48224005	48224026	+	21	-0.317792	0.928344	0.975205	maintain	0	0	1	0	0	0	0	0	0	0	0.785102	0	0	0	0	0
mmu-miR-302a-3p	chr3	127545539	127545561	+	22	-0.317792	0.928344	0.975205	maintain	0	0	1	0	0	0	0	0	0	0	0.785102	0	0	0	0	0
mmu-miR-344-5p	chr7;chr7	61877819;61940073	61877844;61940098	-;-	25;25	-0.317792	0.928344	0.975205	maintain	0	0	1	0	0	0	0	0	0	0	0.785102	0	0	0	0	0
mmu-miR-380-5p	chr12	109711806	109711827	+	21	-0.317792	0.928344	0.975205	maintain	0	0	1	0	0	0	0	0	0	0	0.785102	0	0	0	0	0
mmu-miR-466o-3p	chr2	10472589	10472610	+	21	-0.317792	0.928344	0.975205	maintain	0	0	1	0	0	0	0	0	0	0	0.785102	0	0	0	0	0
mmu-miR-490-5p	chr6	36421763	36421782	+	19	-0.317792	0.928344	0.975205	maintain	0	0	1	0	0	0	0	0	0	0	0.785102	0	0	0	0	0
mmu-miR-5046	chr19	6829917	6829940	-	23	-0.317792	0.928344	0.975205	maintain	0	0	1	0	0	0	0	0	0	0	0.785102	0	0	0	0	0
mmu-miR-5627-5p	chr12	44210313	44210334	+	21	-0.317792	0.928344	0.975205	maintain	0	0	1	0	0	0	0	0	0	0	0.785102	0	0	0	0	0
mmu-miR-592-3p	chr6	27936672	27936693	-	21	-0.317792	0.928344	0.975205	maintain	0	0	1	0	0	0	0	0	0	0	0.785102	0	0	0	0	0
mmu-miR-6375	chr6	85790203	85790225	-	22	-0.317792	0.928344	0.975205	maintain	0	0	1	0	0	0	0	0	0	0	0.785102	0	0	0	0	0
mmu-miR-666-3p	chr12	109717140	109717161	+	21	-0.317792	0.928344	0.975205	maintain	0	0	1	0	0	0	0	0	0	0	0.785102	0	0	0	0	0
mmu-miR-667-5p	chr12	109720020	109720044	+	24	-0.317792	0.928344	0.975205	maintain	0	0	1	0	0	0	0	0	0	0	0.785102	0	0	0	0	0
mmu-miR-678	chr10	76207333	76207354	-	21	-0.317792	0.928344	0.975205	maintain	0	0	1	0	0	0	0	0	0	0	0.785102	0	0	0	0	0
mmu-miR-6910-5p	chr10	79862592	79862614	+	22	-0.317792	0.928344	0.975205	maintain	0	0	1	0	0	0	0	0	0	0	0.785102	0	0	0	0	0
mmu-miR-6975-3p	chr17	35244116	35244135	+	19	-0.317792	0.928344	0.975205	maintain	0	0	1	0	0	0	0	0	0	0	0.785102	0	0	0	0	0
mmu-miR-6983-5p	chr18	61117473	61117494	+	21	-0.317792	0.928344	0.975205	maintain	0	0	1	0	0	0	0	0	0	0	0.785102	0	0	0	0	0
mmu-miR-6988-5p	chr19	6051338	6051358	+	20	-0.317792	0.928344	0.975205	maintain	0	0	1	0	0	0	0	0	0	0	0.785102	0	0	0	0	0
mmu-miR-7029-5p	chr5	115580954	115580976	+	22	-0.317792	0.928344	0.975205	maintain	0	0	1	0	0	0	0	0	0	0	0.785102	0	0	0	0	0
mmu-miR-7031-3p	chr5	121819209	121819229	-	20	-0.317792	0.928344	0.975205	maintain	0	0	1	0	0	0	0	0	0	0	0.785102	0	0	0	0	0
mmu-miR-7066-5p	chr8	70102560	70102581	-	21	-0.317792	0.928344	0.975205	maintain	0	0	1	0	0	0	0	0	0	0	0.785102	0	0	0	0	0
mmu-miR-7669-3p	chr3	90011153	90011175	-	22	-0.317792	0.928344	0.975205	maintain	0	0	1	0	0	0	0	0	0	0	0.785102	0	0	0	0	0
mmu-miR-7684-3p	chr15	82393919	82393940	-	21	-0.317792	0.928344	0.975205	maintain	0	0	1	0	0	0	0	0	0	0	0.785102	0	0	0	0	0
mmu-miR-770-5p	chr12	109563710	109563731	+	21	-0.317792	0.928344	0.975205	maintain	0	0	1	0	0	0	0	0	0	0	0.785102	0	0	0	0	0
mmu-miR-105	chrX	72591547	72591569	-	22	-0.317792	0.928344	0.975205	maintain	1	0	0	0	0	0	0	0	0.866586	0	0	0	0	0	0	0
mmu-miR-12191-5p	chr18	34759533	34759552	+	19	-0.317792	0.928344	0.975205	maintain	1	0	0	0	0	0	0	0	0.866586	0	0	0	0	0	0	0
mmu-miR-1251-3p	chr10	92137152	92137172	-	20	-0.317792	0.928344	0.975205	maintain	1	0	0	0	0	0	0	0	0.866586	0	0	0	0	0	0	0
mmu-miR-1967	chr8	124022688	124022710	+	22	-0.317792	0.928344	0.975205	maintain	1	0	0	0	0	0	0	0	0.866586	0	0	0	0	0	0	0
mmu-miR-1970c-3p	chr9	74966781	74966802	+	21	-0.317792	0.928344	0.975205	maintain	1	0	0	0	0	0	0	0	0.866586	0	0	0	0	0	0	0
mmu-miR-293-3p	chr7	3220390	3220411	+	21	-0.317792	0.928344	0.975205	maintain	1	0	0	0	0	0	0	0	0.866586	0	0	0	0	0	0	0
mmu-miR-295-5p	chr7	3220779	3220800	+	21	-0.317792	0.928344	0.975205	maintain	1	0	0	0	0	0	0	0	0.866586	0	0	0	0	0	0	0
mmu-miR-3098-5p	chr6	125195807	125195828	+	21	-0.317792	0.928344	0.975205	maintain	1	0	0	0	0	0	0	0	0.866586	0	0	0	0	0	0	0
mmu-miR-467d-3p	chr2	10507676	10507697	+	21	-0.317792	0.928344	0.975205	maintain	1	0	0	0	0	0	0	0	0.866586	0	0	0	0	0	0	0
mmu-miR-471-5p	chrX	66792634	66792655	-	21	-0.317792	0.928344	0.975205	maintain	1	0	0	0	0	0	0	0	0.866586	0	0	0	0	0	0	0
mmu-miR-5110	chr11	85760675	85760699	-	24	-0.317792	0.928344	0.975205	maintain	1	0	0	0	0	0	0	0	0.866586	0	0	0	0	0	0	0
mmu-miR-5617-5p	chrX	20863160	20863182	-	22	-0.317792	0.928344	0.975205	maintain	1	0	0	0	0	0	0	0	0.866586	0	0	0	0	0	0	0
mmu-miR-6412	chr10	122648412	122648433	+	21	-0.317792	0.928344	0.975205	maintain	1	0	0	0	0	0	0	0	0.866586	0	0	0	0	0	0	0
mmu-miR-669e-3p	chr2	10467574	10467594	+	20	-0.317792	0.928344	0.975205	maintain	1	0	0	0	0	0	0	0	0.866586	0	0	0	0	0	0	0
mmu-miR-6903-5p	chr1	133726619	133726640	-	21	-0.317792	0.928344	0.975205	maintain	1	0	0	0	0	0	0	0	0.866586	0	0	0	0	0	0	0
mmu-miR-6947-3p	chr14	29988930	29988951	+	21	-0.317792	0.928344	0.975205	maintain	1	0	0	0	0	0	0	0	0.866586	0	0	0	0	0	0	0
mmu-miR-6966-5p	chr17	25780813	25780833	+	20	-0.317792	0.928344	0.975205	maintain	1	0	0	0	0	0	0	0	0.866586	0	0	0	0	0	0	0
mmu-miR-6971-5p	chr17	34841847	34841866	-	19	-0.317792	0.928344	0.975205	maintain	1	0	0	0	0	0	0	0	0.866586	0	0	0	0	0	0	0
mmu-miR-7025-3p	chr5	75176878	75176899	+	21	-0.317792	0.928344	0.975205	maintain	1	0	0	0	0	0	0	0	0.866586	0	0	0	0	0	0	0
mmu-miR-7027-3p	chr5	114404518	114404539	+	21	-0.317792	0.928344	0.975205	maintain	1	0	0	0	0	0	0	0	0.866586	0	0	0	0	0	0	0
mmu-miR-7061-3p	chr7	130908314	130908335	+	21	-0.317792	0.928344	0.975205	maintain	1	0	0	0	0	0	0	0	0.866586	0	0	0	0	0	0	0
mmu-miR-7073-3p	chr8	95753151	95753172	-	21	-0.317792	0.928344	0.975205	maintain	1	0	0	0	0	0	0	0	0.866586	0	0	0	0	0	0	0
mmu-miR-7094b-2-5p	chr12	114513672	114513694	-	22	-0.317792	0.928344	0.975205	maintain	1	0	0	0	0	0	0	0	0.866586	0	0	0	0	0	0	0
mmu-miR-7116-5p	chr11	100478455	100478475	-	20	-0.317792	0.928344	0.975205	maintain	1	0	0	0	0	0	0	0	0.866586	0	0	0	0	0	0	0
mmu-miR-7216-3p	chr17	27328440	27328460	+	20	-0.317792	0.928344	0.975205	maintain	1	0	0	0	0	0	0	0	0.866586	0	0	0	0	0	0	0
mmu-miR-7221-3p	chr2	92592257	92592277	+	20	-0.317792	0.928344	0.975205	maintain	1	0	0	0	0	0	0	0	0.866586	0	0	0	0	0	0	0
mmu-miR-7653-3p	chr11	78178866	78178887	+	21	-0.317792	0.928344	0.975205	maintain	1	0	0	0	0	0	0	0	0.866586	0	0	0	0	0	0	0
mmu-miR-7659-3p	chr10	78340150	78340172	-	22	-0.317792	0.928344	0.975205	maintain	1	0	0	0	0	0	0	0	0.866586	0	0	0	0	0	0	0
mmu-miR-7660-3p	chr6	115775697	115775719	+	22	-0.317792	0.928344	0.975205	maintain	1	0	0	0	0	0	0	0	0.866586	0	0	0	0	0	0	0
mmu-miR-7662-3p	chr10	62194167	62194190	-	23	-0.317792	0.928344	0.975205	maintain	1	0	0	0	0	0	0	0	0.866586	0	0	0	0	0	0	0
mmu-miR-7666-5p	chr8	40307908	40307929	-	21	-0.317792	0.928344	0.975205	maintain	1	0	0	0	0	0	0	0	0.866586	0	0	0	0	0	0	0
mmu-miR-7668-3p	chr7	29906546	29906567	+	21	-0.317792	0.928344	0.975205	maintain	1	0	0	0	0	0	0	0	0.866586	0	0	0	0	0	0	0
mmu-miR-329-5p	chr12	109713503	109713524	+	21	-0.31827	0.916825	0.975205	maintain	0	2	0	0	1	0	0	0	0	1.67364	0	0	1.31801	0	0	0
mmu-miR-871-3p	chrX	66810438	66810460	-	22	-0.318273	0.917283	0.975205	maintain	0	2	0	0	0	0	1	0	0	1.67364	0	0	0	0	1.26353	0
mmu-miR-7057-3p	chr7	66381669	66381690	-	21	-0.318281	0.919159	0.975205	maintain	0	2	0	0	0	1	0	0	0	1.67364	0	0	0	1.04853	0	0
mmu-miR-449c-5p	chr13	113036008	113036028	+	20	-0.32263	0.852741	0.975205	maintain	3	0	2	1	0	0	0	4	2.59976	0	1.5702	0.977618	0	0	0	3.90349
mmu-miR-128-1-5p	chr1	128202369	128202389	+	20	-0.327112	0.363685	0.975205	maintain	18	32	24	27	13	21	9	19	15.5985	26.7782	18.8425	26.3957	17.1341	22.0191	11.3718	18.5416
mmu-miR-5132-3p	chrX	74023534	74023554	-	20	-0.328197	0.700881	0.975205	maintain	7	3	2	4	2	2	1	5	6.0661	2.51046	1.5702	3.91047	2.63601	2.09706	1.26353	4.87936
mmu-miR-5134-5p	chr17	24234575	24234595	-	20	-0.330734	0.834083	0.975205	maintain	1	0	1	4	0	0	1	3	0.866586	0	0.785102	3.91047	0	0	1.26353	2.92762
mmu-miR-877-3p	chr17	35960731	35960752	-	21	-0.331742	0.565047	0.975205	maintain	16	11	5	16	6	4	6	14	13.8654	9.205	3.92551	15.6419	7.90803	4.19411	7.58121	13.6622
mmu-miR-6957-3p	chr15	80646113	80646134	+	21	-0.332071	0.376946	0.975205	maintain	34	42	16	35	21	22	16	18	29.4639	35.1464	12.5616	34.2166	27.6781	23.0676	20.2166	17.5657
mmu-miR-5135	chr12	76533143	76533166	-	23	-0.332551	0.898826	0.975205	maintain	1	1	0	0	0	0	0	1	0.866586	0.836818	0	0	0	0	0	0.975872
mmu-miR-150-5p	chr7	45121762	45121783	+	21	-0.334691	0.059771	0.777494	maintain	305995	337978	349974	336305	210326	266852	148865	172164	265171	282826	274765	328778	277211	279802	188096	168010
mmu-miR-1955-3p	chr2	92192035	92192055	+	20	-0.336599	0.358866	0.975205	maintain	25	30	30	15	11	24	11	14	21.6646	25.1046	23.5531	14.6643	14.4981	25.1647	13.8989	13.6622
mmu-miR-455-3p	chr4	63256904	63256924	+	20	-0.339138	0.0563937	0.753087	maintain	132	176	205	151	73	116	106	102	114.389	147.28	160.946	147.62	96.2144	121.629	133.935	99.539
mmu-miR-6967-5p	chr17;chr17	26920967;33886708	26920987;33886728	+;-	20;20	-0.344164	0.760005	0.975205	maintain	0	2	6	8	2	0	2	6	0	1.67364	4.71061	7.82095	2.63601	0	2.52707	5.85523
mmu-miR-9769-3p	chr7	30552871	30552892	+	21	-0.345572	0.507508	0.975205	maintain	22	9	18	8	4	14	9	7	19.0649	7.53137	14.1318	7.82095	5.27202	14.6794	11.3718	6.83111
mmu-miR-465a-3p	chrX	66839063	66839084	-	21	-0.3507	0.910453	0.975205	maintain	2	0	0	0	0	1	0	0	1.73317	0	0	0	0	1.04853	0	0
mmu-miR-7212-3p	chr15	25948267	25948287	+	20	-0.3507	0.910453	0.975205	maintain	2	0	0	0	0	1	0	0	1.73317	0	0	0	0	1.04853	0	0
mmu-miR-6936-5p	chr11	120624856	120624876	-	20	-0.350818	0.911138	0.975205	maintain	2	0	0	0	0	0	0	1	1.73317	0	0	0	0	0	0	0.975872
mmu-miR-504-5p	chrX	59097705	59097726	-	21	-0.351651	0.0886882	0.968598	maintain	133	186	195	217	78	135	105	123	115.256	155.648	153.095	212.143	102.804	141.551	132.671	120.032
mmu-miR-421-5p	chrX	103572966	103572986	-	20	-0.354694	0.7566	0.975205	maintain	1	2	6	1	0	2	1	3	0.866586	1.67364	4.71061	0.977618	0	2.09706	1.26353	2.92762
mmu-miR-5622-3p	chr2	152865105	152865126	+	21	-0.357721	0.89012	0.975205	maintain	1	0	0	1	0	0	0	1	0.866586	0	0	0.977618	0	0	0	0.975872
mmu-miR-5129-3p	chr2	45023110	45023131	-	21	-0.360966	0.281782	0.975205	maintain	24	33	25	31	13	17	12	26	20.7981	27.615	19.6276	30.3062	17.1341	17.825	15.1624	25.3727
mmu-miR-704	chr6	47803590	47803610	-	20	-0.362563	0.209094	0.975205	maintain	48	37	37	40	17	21	29	29	41.5961	30.9623	29.0488	39.1047	22.4061	22.0191	36.6425	28.3003
mmu-miR-19b-1-5p	chr14	115044320	115044342	+	22	-0.364902	0.699041	0.975205	maintain	8	2	8	1	0	3	5	3	6.93269	1.67364	6.28082	0.977618	0	3.14559	6.31767	2.92762
mmu-miR-1934-3p	chr11	69663092	69663113	+	21	-0.365527	0.623869	0.975205	maintain	7	9	11	3	4	0	7	6	6.0661	7.53137	8.63612	2.93286	5.27202	0	8.84474	5.85523
mmu-miR-667-3p	chr12	109720061	109720083	+	22	-0.370196	0.768315	0.975205	maintain	2	3	1	1	1	0	2	1	1.73317	2.51046	0.785102	0.977618	1.31801	0	2.52707	0.975872
mmu-miR-369-5p	chr12	109743431	109743452	+	21	-0.37075	0.816419	0.975205	maintain	2	0	1	2	1	2	0	0	1.73317	0	0.785102	1.95524	1.31801	2.09706	0	0
mmu-miR-466f	chr13	71107108	71107129	+	21	-0.372445	0.66987	0.975205	maintain	2	5	2	6	1	2	3	3	1.73317	4.18409	1.5702	5.86571	1.31801	2.09706	3.7906	2.92762
mmu-miR-466d-5p	chr2	10511977	10511998	+	21	-0.37569	0.528745	0.975205	maintain	10	12	10	4	2	4	7	8	8.66586	10.0418	7.85102	3.91047	2.63601	4.19411	8.84474	7.80698
mmu-miR-466n-5p	chr2	10513759	10513780	+	21	-0.37569	0.528745	0.975205	maintain	10	12	10	4	2	4	7	8	8.66586	10.0418	7.85102	3.91047	2.63601	4.19411	8.84474	7.80698
mmu-miR-3079-3p	chr15	76290891	76290911	-	20	-0.375851	0.818257	0.975205	maintain	1	1	3	0	0	1	0	2	0.866586	0.836818	2.35531	0	0	1.04853	0	1.95174
mmu-miR-6905-3p	chr10	24910711	24910731	+	20	-0.379794	0.788322	0.975205	maintain	2	0	3	3	0	0	1	4	1.73317	0	2.35531	2.93286	0	0	1.26353	3.90349
mmu-miR-542-5p	chrX	53049453	53049474	-	21	-0.382098	0.524429	0.975205	maintain	10	16	5	8	6	9	2	6	8.66586	13.3891	3.92551	7.82095	7.90803	9.43676	2.52707	5.85523
mmu-miR-1934-5p	chr11	69663055	69663077	+	22	-0.386008	0.266319	0.975205	maintain	26	36	25	19	10	15	14	23	22.5312	30.1255	19.6276	18.5747	13.1801	15.7279	17.6895	22.4451
mmu-miR-6897-5p	chr1	36144290	36144312	-	22	-0.386225	0.71566	0.975205	maintain	4	2	2	2	0	3	1	2	3.46634	1.67364	1.5702	1.95524	0	3.14559	1.26353	1.95174
mmu-miR-1306-5p	chr16	18284288	18284310	-	22	-0.387823	0.180596	0.975205	maintain	42	40	51	35	16	27	16	40	36.3966	33.4727	40.0402	34.2166	21.0881	28.3103	20.2166	39.0349
mmu-miR-7026-5p	chr5	110666116	110666136	-	20	-0.389535	0.735248	0.975205	maintain	6	1	2	1	1	2	0	3	5.19952	0.836818	1.5702	0.977618	1.31801	2.09706	0	2.92762
mmu-miR-6929-3p	chr11	101419187	101419209	-	22	-0.400919	0.893449	0.975205	maintain	0	0	0	2	1	0	0	0	0	0	0	1.95524	1.31801	0	0	0
mmu-miR-7089-5p	chr9	109889648	109889671	+	23	-0.400919	0.893449	0.975205	maintain	0	0	0	2	1	0	0	0	0	0	0	1.95524	1.31801	0	0	0
mmu-miR-7078-5p	chr8	117459270	117459289	+	19	-0.401502	0.893819	0.975205	maintain	0	0	0	2	0	0	1	0	0	0	0	1.95524	0	0	1.26353	0
mmu-miR-6912-3p	chr10	80609305	80609329	+	24	-0.403905	0.895344	0.975205	maintain	0	0	0	2	0	1	0	0	0	0	0	1.95524	0	1.04853	0	0
mmu-miR-6941-3p	chr12	112920483	112920503	-	20	-0.404754	0.895884	0.975205	maintain	0	0	0	2	0	0	0	1	0	0	0	1.95524	0	0	0	0.975872
mmu-miR-3572-3p	chr7	3656010	3656032	+	22	-0.408338	0.583759	0.975205	maintain	5	3	6	7	3	1	4	4	4.33293	2.51046	4.71061	6.84333	3.95402	1.04853	5.05414	3.90349
mmu-miR-1249-3p	chr15	84951545	84951566	-	21	-0.410487	0.0845424	0.963229	maintain	202	205	268	204	80	111	96	229	175.05	171.548	210.407	199.434	105.44	116.387	121.299	223.475
mmu-miR-1893	chr18	6490574	6490595	-	21	-0.413027	0.562282	0.975205	maintain	7	7	3	6	3	3	5	2	6.0661	5.85773	2.35531	5.86571	3.95402	3.14559	6.31767	1.95174
mmu-miR-7658-3p	chr4	156230059	156230079	-	20	-0.416351	0.466618	0.975205	maintain	8	10	9	12	3	9	2	9	6.93269	8.36818	7.06592	11.7314	3.95402	9.43676	2.52707	8.78285
mmu-miR-8120	chr3	65659328	65659349	+	21	-0.417573	0.562114	0.975205	maintain	5	25	11	4	10	2	7	5	4.33293	20.9205	8.63612	3.91047	13.1801	2.09706	8.84474	4.87936
mmu-miR-5618-5p	chr9	7784390	7784409	+	19	-0.420419	0.778572	0.975205	maintain	2	1	1	1	0	1	0	2	1.73317	0.836818	0.785102	0.977618	0	1.04853	0	1.95174
mmu-miR-5103	chr1	34433130	34433149	-	19	-0.435196	0.214988	0.975205	maintain	22	22	30	23	11	18	8	18	19.0649	18.41	23.5531	22.4852	14.4981	18.8735	10.1083	17.5657
mmu-miR-3473d	chr8	111016498	111016521	-	23	-0.436826	0.256375	0.975205	maintain	20	17	27	17	14	11	8	12	17.3317	14.2259	21.1978	16.6195	18.4521	11.5338	10.1083	11.7105
mmu-miR-5134-3p	chr17	24234535	24234556	-	21	-0.437233	0.677386	0.975205	maintain	2	1	9	5	0	1	2	7	1.73317	0.836818	7.06592	4.88809	0	1.04853	2.52707	6.83111
mmu-miR-1948-5p	chr18	12714825	12714845	+	20	-0.444615	0.388117	0.975205	maintain	11	9	12	9	3	7	6	7	9.53245	7.53137	9.42123	8.79857	3.95402	7.3397	7.58121	6.83111
mmu-miR-3572-5p	chr7	3655970	3655991	+	21	-0.44997	0.584257	0.975205	maintain	2	3	12	5	1	3	5	3	1.73317	2.51046	9.42123	4.88809	1.31801	3.14559	6.31767	2.92762
mmu-miR-505-5p	chrX	60394451	60394473	-	22	-0.45848	0.343278	0.975205	maintain	17	15	8	21	8	8	10	8	14.732	12.5523	6.28082	20.53	10.544	8.38823	12.6353	7.80698
mmu-miR-28c	chr15	53614216	53614235	-	19	-0.46205	0.29544	0.975205	maintain	15	11	19	17	7	8	11	8	12.9988	9.205	14.9169	16.6195	9.22604	8.38823	13.8989	7.80698
mmu-miR-7651-5p	chr11	6401630	6401651	+	21	-0.462619	0.618236	0.975205	maintain	4	1	8	3	1	2	1	5	3.46634	0.836818	6.28082	2.93286	1.31801	2.09706	1.26353	4.87936
mmu-miR-7063-5p	chr7	141620706	141620728	+	22	-0.468314	0.637873	0.975205	maintain	4	5	4	0	1	2	2	2	3.46634	4.18409	3.14041	0	1.31801	2.09706	2.52707	1.95174
mmu-miR-3964	chr15	29713337	29713356	-	19	-0.470963	0.0598503	0.777494	maintain	58	96	62	61	33	44	27	49	50.262	80.3346	48.6763	59.6347	43.4942	46.1353	34.1154	47.8177
mmu-miR-141-5p	chr6	124717959	124717980	-	21	-0.477582	0.209855	0.975205	maintain	20	18	26	15	10	11	8	14	17.3317	15.0627	20.4127	14.6643	13.1801	11.5338	10.1083	13.6622
mmu-miR-1956	chr3	138526425	138526446	+	21	-0.482413	0.780148	0.975205	maintain	2	6	0	0	3	1	0	0	1.73317	5.02091	0	0	3.95402	1.04853	0	0
mmu-miR-5127	chr18	81992020	81992038	-	18	-0.482856	0.197211	0.975205	maintain	22	32	31	40	12	29	14	14	19.0649	26.7782	24.3382	39.1047	15.8161	30.4073	17.6895	13.6622
mmu-miR-7225-5p	chr3	97690543	97690562	-	19	-0.494726	0.495059	0.975205	maintain	6	11	3	7	3	2	2	8	5.19952	9.205	2.35531	6.84333	3.95402	2.09706	2.52707	7.80698
mmu-miR-212-3p	chr11	75173443	75173464	+	21	-0.496214	0.111189	0.975205	maintain	30	34	34	47	17	20	18	24	25.9976	28.4518	26.6935	45.9481	22.4061	20.9706	22.7436	23.4209
mmu-miR-8101	chr11	102230103	102230124	-	21	-0.503454	0.677968	0.975205	maintain	1	0	3	5	1	1	1	2	0.866586	0	2.35531	4.88809	1.31801	1.04853	1.26353	1.95174
mmu-miR-8114	chr1	153899989	153900009	+	20	-0.505531	0.222267	0.975205	maintain	15	18	22	29	9	11	8	18	12.9988	15.0627	17.2722	28.3509	11.862	11.5338	10.1083	17.5657
mmu-miR-7679-3p	chr11	82985003	82985026	-	23	-0.514001	0.708895	0.975205	maintain	2	0	1	4	0	1	1	2	1.73317	0	0.785102	3.91047	0	1.04853	1.26353	1.95174
mmu-miR-6911-5p	chr10	80278169	80278191	+	22	-0.515263	0.717754	0.975205	maintain	2	2	1	1	2	0	1	0	1.73317	1.67364	0.785102	0.977618	2.63601	0	1.26353	0
mmu-miR-7086-5p	chr9	45266682	45266702	-	20	-0.531105	0.787683	0.975205	maintain	0	1	3	0	1	0	0	1	0	0.836818	2.35531	0	1.31801	0	0	0.975872
mmu-miR-365-2-5p	chr11	79726428	79726450	+	22	-0.5382	0.666445	0.975205	maintain	1	3	3	2	0	1	0	4	0.866586	2.51046	2.35531	1.95524	0	1.04853	0	3.90349
mmu-miR-29b-2-5p	chr1	195037050	195037074	+	24	-0.544173	0.279426	0.975205	maintain	21	11	20	6	6	8	6	10	18.1983	9.205	15.702	5.86571	7.90803	8.38823	7.58121	9.75872
mmu-miR-6958-3p	chr15	89185465	89185487	-	22	-0.548604	0.661593	0.975205	maintain	2	4	1	3	4	0	0	1	1.73317	3.34727	0.785102	2.93286	5.27202	0	0	0.975872
mmu-miR-6983-3p	chr18	61117509	61117531	+	22	-0.55284	0.680445	0.975205	maintain	1	1	4	2	0	0	3	1	0.866586	0.836818	3.14041	1.95524	0	0	3.7906	0.975872
mmu-miR-488-3p	chr1	158505689	158505709	+	20	-0.562387	0.47133	0.975205	maintain	9	6	4	5	4	4	4	0	7.79927	5.02091	3.14041	4.88809	5.27202	4.19411	5.05414	0
mmu-miR-6942-5p	chr13	21396613	21396633	-	20	-0.56271	0.749048	0.975205	maintain	1	2	0	1	1	0	1	0	0.866586	1.67364	0	0.977618	1.31801	0	1.26353	0
mmu-miR-6937-5p	chr12	28679325	28679348	+	23	-0.562972	0.777498	0.975205	maintain	1	0	3	0	0	1	0	1	0.866586	0	2.35531	0	0	1.04853	0	0.975872
mmu-miR-7015-5p	chr4	120973295	120973317	-	22	-0.570097	0.72117	0.975205	maintain	0	3	3	0	0	1	1	1	0	2.51046	2.35531	0	0	1.04853	1.26353	0.975872
mmu-miR-18b-3p	chrX	52742342	52742363	-	21	-0.577751	0.371062	0.975205	maintain	10	17	10	3	5	9	3	3	8.66586	14.2259	7.85102	2.93286	6.59003	9.43676	3.7906	2.92762
mmu-miR-5122	chr4	133369784	133369803	+	19	-0.579551	0.0622626	0.790549	maintain	44	29	43	34	19	26	15	16	38.1298	24.2677	33.7594	33.239	25.0421	27.2617	18.953	15.614
mmu-miR-3103-3p	chr7	128288370	128288391	-	21	-0.579562	0.537488	0.975205	maintain	8	1	4	4	0	3	2	4	6.93269	0.836818	3.14041	3.91047	0	3.14559	2.52707	3.90349
mmu-miR-7059-3p	chr7	126579474	126579495	-	21	-0.582654	0.798883	0.975205	maintain	4	0	0	0	0	1	1	0	3.46634	0	0	0	0	1.04853	1.26353	0
mmu-miR-6967-3p	chr17;chr17	26921000;33886676	26921019;33886695	+;-	19;19	-0.585052	0.292231	0.975205	maintain	14	10	10	6	6	6	4	4	12.1322	8.36818	7.85102	5.86571	7.90803	6.29117	5.05414	3.90349
mmu-miR-499-5p	chr2	155622893	155622913	+	20	-0.591583	0.0958609	0.969042	maintain	62	86	51	57	16	20	45	49	53.7283	71.9664	40.0402	55.7242	21.0881	20.9706	56.859	47.8177
mmu-miR-297c-5p	chr2	10509026	10509047	+	21	-0.59634	0.691254	0.975205	maintain	1	4	1	0	0	1	1	1	0.866586	3.34727	0.785102	0	0	1.04853	1.26353	0.975872
mmu-miR-6546-5p	chr1	171064629	171064652	-	23	-0.59648	0.490016	0.975205	maintain	6	4	4	6	5	0	1	4	5.19952	3.34727	3.14041	5.86571	6.59003	0	1.26353	3.90349
mmu-miR-6986-5p	chr19	4623929	4623950	-	21	-0.600171	0.50978	0.975205	maintain	4	1	8	3	1	2	2	3	3.46634	0.836818	6.28082	2.93286	1.31801	2.09706	2.52707	2.92762
mmu-miR-3076-5p	chr14	30572150	30572173	+	23	-0.610732	0.758864	0.975205	maintain	1	3	0	0	0	1	0	1	0.866586	2.51046	0	0	0	1.04853	0	0.975872
mmu-miR-7075-3p	chr8	107096025	107096045	-	20	-0.61319	0.292442	0.975205	maintain	7	12	12	17	2	9	3	11	6.0661	10.0418	9.42123	16.6195	2.63601	9.43676	3.7906	10.7346
mmu-miR-465b-3p	chrX;chrX	66829212;66835774	66829233;66835795	-;-	21;21	-0.618876	0.818568	0.975205	maintain	4	0	0	0	0	2	0	0	3.46634	0	0	0	0	2.09706	0	0
mmu-miR-465c-3p	chrX;chrX	66825965;66832527	66825986;66832548	-;-	21;21	-0.618876	0.818568	0.975205	maintain	4	0	0	0	0	2	0	0	3.46634	0	0	0	0	2.09706	0	0
mmu-miR-873a-3p	chr4	36668520	36668540	-	20	-0.621016	0.724351	0.975205	maintain	1	0	1	2	0	1	1	0	0.866586	0	0.785102	1.95524	0	1.04853	1.26353	0
mmu-miR-376b-3p	chr12	109723508	109723528	+	20	-0.623402	0.667875	0.975205	maintain	1	4	0	3	0	2	2	0	0.866586	3.34727	0	2.93286	0	2.09706	2.52707	0
mmu-miR-34b-3p	chr9	51103574	51103595	-	21	-0.624684	0.317523	0.975205	maintain	9	16	7	6	2	9	3	5	7.79927	13.3891	5.49572	5.86571	2.63601	9.43676	3.7906	4.87936
mmu-miR-615-3p	chr15	103014969	103014990	+	21	-0.624711	0.44857	0.975205	maintain	3	2	9	6	2	3	1	4	2.59976	1.67364	7.06592	5.86571	2.63601	3.14559	1.26353	3.90349
mmu-miR-6899-3p	chr1	64042438	64042460	-	22	-0.634062	0.0533777	0.735515	maintain	29	32	33	44	17	21	14	16	25.131	26.7782	25.9084	43.0152	22.4061	22.0191	17.6895	15.614
mmu-miR-7086-3p	chr9	45266643	45266663	-	20	-0.637332	0.419745	0.975205	maintain	7	1	16	10	4	4	1	8	6.0661	0.836818	12.5616	9.77618	5.27202	4.19411	1.26353	7.80698
mmu-miR-466h-5p	chr2	10514901	10514922	+	21	-0.647298	0.211893	0.975205	maintain	13	16	15	7	7	5	8	4	11.2656	13.3891	11.7765	6.84333	9.22604	5.24264	10.1083	3.90349
mmu-miR-5124a	chr13	40865801	40865820	+	19	-0.654187	0.739156	0.975205	maintain	0	0	1	3	1	1	0	0	0	0	0.785102	2.93286	1.31801	1.04853	0	0
mmu-miR-192-3p	chr19	6264900	6264921	+	21	-0.668393	0.648086	0.975205	maintain	3	1	1	1	0	2	0	1	2.59976	0.836818	0.785102	0.977618	0	2.09706	0	0.975872
mmu-miR-301b-3p	chr16	17124420	17124442	-	22	-0.671638	0.209059	0.975205	maintain	13	10	10	11	3	7	7	4	11.2656	8.36818	7.85102	10.7538	3.95402	7.3397	8.84474	3.90349
mmu-miR-182-3p	chr6	30165923	30165943	-	20	-0.680073	0.728126	0.975205	maintain	2	1	0	1	0	0	0	2	1.73317	0.836818	0	0.977618	0	0	0	1.95174
mmu-miR-7057-5p	chr7	66381702	66381719	-	17	-0.681009	0.619349	0.975205	maintain	5	1	0	2	0	1	1	2	4.33293	0.836818	0	1.95524	0	1.04853	1.26353	1.95174
mmu-miR-1966-3p	chr8	105615521	105615543	+	22	-0.685972	0.669002	0.975205	maintain	3	0	0	3	1	1	0	1	2.59976	0	0	2.93286	1.31801	1.04853	0	0.975872
mmu-miR-6973a-3p	chr17	35195024	35195045	+	21	-0.695227	0.425674	0.975205	maintain	8	5	5	1	1	4	1	3	6.93269	4.18409	3.92551	0.977618	1.31801	4.19411	1.26353	2.92762
mmu-miR-7674-3p	chr2	32050988	32051008	+	20	-0.703703	0.690232	0.975205	maintain	3	2	1	0	0	0	0	3	2.59976	1.67364	0.785102	0	0	0	0	2.92762
mmu-miR-7671-3p	chr11	53763597	53763618	-	21	-0.711715	0.412362	0.975205	maintain	4	7	2	6	1	5	2	1	3.46634	5.85773	1.5702	5.86571	1.31801	5.24264	2.52707	0.975872
mmu-miR-7049-5p	chr7	28560957	28560979	-	22	-0.718595	0.508036	0.975205	maintain	4	1	3	5	0	1	4	1	3.46634	0.836818	2.35531	4.88809	0	1.04853	5.05414	0.975872
mmu-miR-7667-3p	chr17	29595579	29595600	+	21	-0.719263	0.385035	0.975205	maintain	4	8	5	12	3	1	8	1	3.46634	6.69455	3.92551	11.7314	3.95402	1.04853	10.1083	0.975872
mmu-miR-7649-3p	chr6	128974840	128974862	-	22	-0.736009	0.511003	0.975205	maintain	5	9	1	4	5	0	3	0	4.33293	7.53137	0.785102	3.91047	6.59003	0	3.7906	0
mmu-miR-1929-5p	chr10	44359692	44359714	+	22	-0.739289	0.233268	0.975205	maintain	5	7	12	13	5	5	2	5	4.33293	5.85773	9.42123	12.709	6.59003	5.24264	2.52707	4.87936
mmu-miR-6990-5p	chr19	6914261	6914281	-	20	-0.746277	0.523526	0.975205	maintain	2	2	6	2	2	0	3	0	1.73317	1.67364	4.71061	1.95524	2.63601	0	3.7906	0
mmu-miR-181b-2-3p	chr2	38853883	38853904	+	21	-0.759927	0.23907	0.975205	maintain	6	10	11	7	3	1	6	5	5.19952	8.36818	8.63612	6.84333	3.95402	1.04853	7.58121	4.87936
mmu-miR-7090-3p	chr9	120955128	120955147	+	19	-0.766055	0.450054	0.975205	maintain	5	4	2	2	0	2	1	3	4.33293	3.34727	1.5702	1.95524	0	2.09706	1.26353	2.92762
mmu-miR-881-3p	chrX	66801954	66801975	-	21	-0.767895	0.457414	0.975205	maintain	11	2	2	3	1	0	4	3	9.53245	1.67364	1.5702	2.93286	1.31801	0	5.05414	2.92762
mmu-miR-6399	chr4	138163263	138163284	+	21	-0.769062	0.733036	0.975205	maintain	1	0	0	3	0	0	0	2	0.866586	0	0	2.93286	0	0	0	1.95174
mmu-miR-6418-3p	chr5	137529509	137529530	-	21	-0.775028	0.412543	0.975205	maintain	6	3	7	2	0	5	2	1	5.19952	2.51046	5.49572	1.95524	0	5.24264	2.52707	0.975872
mmu-miR-205-5p	chr1	193507503	193507524	-	21	-0.778331	0.309328	0.975205	maintain	4	10	7	6	1	7	3	1	3.46634	8.36818	5.49572	5.86571	1.31801	7.3397	3.7906	0.975872
mmu-miR-24-3p	chr13;chr8	63301251;84208875	63301272;84208896	+;+	21;21	-0.789912	0.785858	0.975205	maintain	0	0	3	0	0	0	1	0	0	0	2.35531	0	0	0	1.26353	0
mmu-miR-6972-3p	chr17	34857569	34857589	-	20	-0.789912	0.785858	0.975205	maintain	0	0	3	0	0	0	1	0	0	0	2.35531	0	0	0	1.26353	0
mmu-miR-6390	chr14	105623710	105623730	-	20	-0.79323	0.674649	0.975205	maintain	1	1	3	0	2	0	0	0	0.866586	0.836818	2.35531	0	2.63601	0	0	0
mmu-miR-433-3p	chr12	109591781	109591802	+	21	-0.819383	0.664498	0.975205	maintain	1	3	1	0	0	0	2	0	0.866586	2.51046	0.785102	0	0	0	2.52707	0
mmu-miR-7006-3p	chr2	181587900	181587919	-	19	-0.824879	0.729401	0.975205	maintain	0	1	2	0	1	0	0	0	0	0.836818	1.5702	0	1.31801	0	0	0
mmu-miR-6901-5p	chr1	93274554	93274573	+	19	-0.83574	0.651416	0.975205	maintain	0	2	2	1	0	0	2	0	0	1.67364	1.5702	0.977618	0	0	2.52707	0
mmu-miR-1199-3p	chr8	84011549	84011569	-	20	-0.83662	0.730431	0.975205	maintain	1	0	2	0	0	1	0	0	0.866586	0	1.5702	0	0	1.04853	0	0
mmu-miR-3102-3p	chr7	100882307	100882329	-	22	-0.83662	0.730431	0.975205	maintain	1	0	2	0	0	1	0	0	0.866586	0	1.5702	0	0	1.04853	0	0
mmu-miR-1904	chr13	109903819	109903840	+	21	-0.846605	0.727116	0.975205	maintain	0	2	1	0	0	1	0	0	0	1.67364	0.785102	0	0	1.04853	0	0
mmu-miR-1271-3p	chr13	54578188	54578210	+	22	-0.847227	0.722888	0.975205	maintain	0	2	1	0	0	0	1	0	0	1.67364	0.785102	0	0	0	1.26353	0
mmu-miR-3968	chr11	115447969	115447989	-	20	-0.854285	0.130094	0.975205	maintain	12	15	7	9	5	5	4	4	10.399	12.5523	5.49572	8.79857	6.59003	5.24264	5.05414	3.90349
mmu-miR-187-5p	chr18	24429147	24429168	-	21	-0.8564	0.214734	0.975205	maintain	6	9	8	6	5	4	1	2	5.19952	7.53137	6.28082	5.86571	6.59003	4.19411	1.26353	1.95174
mmu-miR-291b-5p	chr7	3219494	3219515	+	21	-0.85704	0.612282	0.975205	maintain	1	1	2	1	0	0	2	0	0.866586	0.836818	1.5702	0.977618	0	0	2.52707	0
mmu-miR-190a-5p	chr9	67236700	67236721	-	21	-0.864835	0.67756	0.975205	maintain	1	1	1	0	1	0	0	0	0.866586	0.836818	0.785102	0	1.31801	0	0	0
mmu-miR-2136	chr9	104426163	104426183	+	20	-0.865321	0.768168	0.975205	maintain	0	3	0	0	0	1	0	0	0	2.51046	0	0	0	1.04853	0	0
mmu-miR-673-5p	chr12	109572004	109572025	+	21	-0.865321	0.768168	0.975205	maintain	0	3	0	0	0	1	0	0	0	2.51046	0	0	0	1.04853	0	0
mmu-miR-669n	chr3	115979905	115979924	+	19	-0.86762	0.584102	0.975205	maintain	1	1	2	1	1	0	1	0	0.866586	0.836818	1.5702	0.977618	1.31801	0	1.26353	0
mmu-miR-135a-2-3p	chr10	92072104	92072124	-	20	-0.875213	0.636164	0.975205	maintain	1	0	2	2	0	0	2	0	0.866586	0	1.5702	1.95524	0	0	2.52707	0
mmu-miR-1668	chr8	83723903	83723923	-	20	-0.879913	0.199385	0.975205	maintain	5	6	11	11	3	3	1	7	4.33293	5.02091	8.63612	10.7538	3.95402	3.14559	1.26353	6.83111
mmu-miR-466m-5p	chr2	10466677	10466699	+	22	-0.894468	0.707079	0.975205	maintain	2	1	0	0	0	0	1	0	1.73317	0.836818	0	0	0	0	1.26353	0
mmu-miR-6922-3p	chr11	60202262	60202284	-	22	-0.894468	0.707079	0.975205	maintain	2	1	0	0	0	0	1	0	1.73317	0.836818	0	0	0	0	1.26353	0
mmu-miR-28b	chr8	73016523	73016543	+	20	-0.898442	0.634101	0.975205	maintain	0	0	2	3	1	0	1	0	0	0	1.5702	2.93286	1.31801	0	1.26353	0
mmu-miR-201-5p	chrX	67988135	67988156	-	21	-0.914222	0.659117	0.975205	maintain	1	0	1	1	1	0	0	0	0.866586	0	0.785102	0.977618	1.31801	0	0	0
mmu-miR-1190	chr12	101021692	101021713	-	21	-0.916901	0.555649	0.975205	maintain	2	4	0	1	0	1	0	2	1.73317	3.34727	0	0.977618	0	1.04853	0	1.95174
mmu-miR-12178-3p	chr1	164217719	164217740	+	21	-0.926172	0.696421	0.975205	maintain	0	2	0	1	0	0	1	0	0	1.67364	0	0.977618	0	0	1.26353	0
mmu-miR-6956-5p	chr15	79002231	79002250	+	19	-0.926464	0.700447	0.975205	maintain	0	2	0	1	0	1	0	0	0	1.67364	0	0.977618	0	1.04853	0	0
mmu-miR-7042-5p	chr6	113707213	113707233	+	20	-0.935458	0.247221	0.975205	maintain	5	3	5	7	2	2	2	2	4.33293	2.51046	3.92551	6.84333	2.63601	2.09706	2.52707	1.95174
mmu-miR-6961-3p	chr15	100649163	100649184	-	21	-0.936712	0.587072	0.975205	maintain	1	1	0	3	1	0	1	0	0.866586	0.836818	0	2.93286	1.31801	0	1.26353	0
mmu-miR-7059-5p	chr7	126579506	126579527	-	21	-0.954094	0.266894	0.975205	maintain	6	4	4	4	3	1	1	2	5.19952	3.34727	3.14041	3.91047	3.95402	1.04853	1.26353	1.95174
mmu-miR-6930-5p	chr11	102404960	102404982	-	22	-0.96109	0.690322	0.975205	maintain	0	0	1	2	0	0	0	1	0	0	0.785102	1.95524	0	0	0	0.975872
mmu-miR-297b-5p	chr2	10511686	10511707	+	21	-0.966153	0.411208	0.975205	maintain	3	4	1	2	0	1	1	2	2.59976	3.34727	0.785102	1.95524	0	1.04853	1.26353	1.95174
mmu-miR-12194-3p	chr3	55887284	55887305	-	21	-0.987065	0.779869	0.975205	maintain	0	0	2	0	0	0	0	0	0	0	1.5702	0	0	0	0	0
mmu-miR-190a-3p	chr9	67236664	67236685	-	21	-0.987065	0.779869	0.975205	maintain	0	0	2	0	0	0	0	0	0	0	1.5702	0	0	0	0	0
mmu-miR-219c-3p	chr17	34025050	34025071	+	21	-0.987065	0.779869	0.975205	maintain	0	0	2	0	0	0	0	0	0	0	1.5702	0	0	0	0	0
mmu-miR-3067-5p	chr12	81166165	81166187	+	22	-0.987065	0.779869	0.975205	maintain	0	0	2	0	0	0	0	0	0	0	1.5702	0	0	0	0	0
mmu-miR-376c-3p	chr12	109722770	109722790	+	20	-0.987065	0.779869	0.975205	maintain	0	0	2	0	0	0	0	0	0	0	1.5702	0	0	0	0	0
mmu-miR-7007-3p	chr3	20222294	20222311	-	17	-0.987065	0.779869	0.975205	maintain	0	0	2	0	0	0	0	0	0	0	1.5702	0	0	0	0	0
mmu-miR-7047-3p	chr7	24987606	24987628	-	22	-0.987065	0.779869	0.975205	maintain	0	0	2	0	0	0	0	0	0	0	1.5702	0	0	0	0	0
mmu-miR-7661-5p	chr6	108489743	108489767	+	24	-0.987065	0.779869	0.975205	maintain	0	0	2	0	0	0	0	0	0	0	1.5702	0	0	0	0	0
mmu-miR-1902	chr2	104428871	104428892	-	21	-0.995196	0.283716	0.975205	maintain	8	2	6	5	2	5	1	0	6.93269	1.67364	4.71061	4.88809	2.63601	5.24264	1.26353	0
mmu-miR-543-3p	chr12	109717304	109717325	+	21	-1.00367	0.42514	0.975205	maintain	1	2	4	3	0	1	0	3	0.866586	1.67364	3.14041	2.93286	0	1.04853	0	2.92762
mmu-miR-6977-3p	chr17	56418850	56418871	-	21	-1.01311	0.774146	0.975205	maintain	0	1	1	0	0	0	0	0	0	0.836818	0.785102	0	0	0	0	0
mmu-miR-6406	chr11	68220917	68220938	+	21	-1.01465	0.448631	0.975205	maintain	0	1	3	9	3	1	0	1	0	0.836818	2.35531	8.79857	3.95402	1.04853	0	0.975872
mmu-miR-24-1-5p	chr13	63301213	63301235	+	22	-1.02148	0.772307	0.975205	maintain	1	0	1	0	0	0	0	0	0.866586	0	0.785102	0	0	0	0	0
mmu-miR-302d-3p	chr3	127545665	127545687	+	22	-1.02148	0.772307	0.975205	maintain	1	0	1	0	0	0	0	0	0.866586	0	0.785102	0	0	0	0	0
mmu-miR-3095-3p	chr4	58441023	58441045	-	22	-1.02148	0.772307	0.975205	maintain	1	0	1	0	0	0	0	0	0.866586	0	0.785102	0	0	0	0	0
mmu-miR-6927-5p	chr11	97677060	97677081	+	21	-1.02148	0.772307	0.975205	maintain	1	0	1	0	0	0	0	0	0.866586	0	0.785102	0	0	0	0	0
mmu-miR-383-3p	chr8	38252138	38252158	-	20	-1.02149	0.771758	0.975205	maintain	0	0	1	1	0	0	0	0	0	0	0.785102	0.977618	0	0	0	0
mmu-miR-7017-5p	chr4	133195660	133195683	+	23	-1.0221	0.500673	0.975205	maintain	3	0	4	1	1	0	0	2	2.59976	0	3.14041	0.977618	1.31801	0	0	1.95174
mmu-miR-217-3p	chr11	28763798	28763820	+	22	-1.03966	0.768313	0.975205	maintain	0	2	0	0	0	0	0	0	0	1.67364	0	0	0	0	0	0
mmu-miR-3075-3p	chr14	25534491	25534511	+	20	-1.03966	0.768313	0.975205	maintain	0	2	0	0	0	0	0	0	0	1.67364	0	0	0	0	0	0
mmu-miR-3093-5p	chr3	88215186	88215207	+	21	-1.03966	0.768313	0.975205	maintain	0	2	0	0	0	0	0	0	0	1.67364	0	0	0	0	0	0
mmu-miR-6409	chr10	76008993	76009015	+	22	-1.03966	0.768313	0.975205	maintain	0	2	0	0	0	0	0	0	0	1.67364	0	0	0	0	0	0
mmu-miR-7083-3p	chr9	21809941	21809960	-	19	-1.03966	0.768313	0.975205	maintain	0	2	0	0	0	0	0	0	0	1.67364	0	0	0	0	0	0
mmu-miR-7004-5p	chr2	168640731	168640754	-	23	-1.05074	0.709818	0.975205	maintain	0	0	0	3	1	0	0	0	0	0	0	2.93286	1.31801	0	0	0
mmu-miR-7064-3p	chr7	143570673	143570693	-	20	-1.05098	0.710764	0.975205	maintain	0	0	0	3	0	0	1	0	0	0	0	2.93286	0	0	1.26353	0
mmu-miR-6992-5p	chr19	8742976	8742998	+	22	-1.05227	0.715954	0.975205	maintain	0	0	0	3	0	0	0	1	0	0	0	2.93286	0	0	0	0.975872
mmu-miR-879-5p	chr5	9375714	9375734	+	20	-1.05285	0.423079	0.975205	maintain	1	3	1	3	1	1	0	1	0.866586	2.51046	0.785102	2.93286	1.31801	1.04853	0	0.975872
mmu-miR-344d-3p	chr7;chr7;chr7	61683127;61685279;61726256	61683148;61685300;61726277	-;-;-	21;21;21	-1.05546	0.593253	0.975205	maintain	3	6	0	0	0	0	3	0	2.59976	5.02091	0	0	0	0	3.7906	0
mmu-miR-6929-5p	chr11	101419228	101419248	-	20	-1.05636	0.764627	0.975205	maintain	1	1	0	0	0	0	0	0	0.866586	0.836818	0	0	0	0	0	0
mmu-miR-3088-5p	chr2	28733286	28733307	+	21	-1.06295	0.76113	0.975205	maintain	0	1	0	1	0	0	0	0	0	0.836818	0	0.977618	0	0	0	0
mmu-miR-5101	chr12	75909154	75909175	+	21	-1.06295	0.76113	0.975205	maintain	0	1	0	1	0	0	0	0	0	0.836818	0	0.977618	0	0	0	0
mmu-miR-7007-5p	chr3	20222332	20222354	-	22	-1.06295	0.76113	0.975205	maintain	0	1	0	1	0	0	0	0	0	0.836818	0	0.977618	0	0	0	0
mmu-miR-7036a-5p	chr5	137296661	137296683	-	22	-1.06295	0.76113	0.975205	maintain	0	1	0	1	0	0	0	0	0	0.836818	0	0.977618	0	0	0	0
mmu-miR-707	chr7	44849705	44849725	+	20	-1.06295	0.76113	0.975205	maintain	0	1	0	1	0	0	0	0	0	0.836818	0	0.977618	0	0	0	0
mmu-miR-8116	chr5	137293800	137293820	+	20	-1.06295	0.76113	0.975205	maintain	0	1	0	1	0	0	0	0	0	0.836818	0	0.977618	0	0	0	0
mmu-miR-12181-3p	chr11	77467553	77467573	+	20	-1.07363	0.760812	0.975205	maintain	2	0	0	0	0	0	0	0	1.73317	0	0	0	0	0	0	0
mmu-miR-12185-5p	chr14	63150324	63150348	-	24	-1.07363	0.760812	0.975205	maintain	2	0	0	0	0	0	0	0	1.73317	0	0	0	0	0	0	0
mmu-miR-6944-5p	chr13	55477754	55477776	-	22	-1.07363	0.760812	0.975205	maintain	2	0	0	0	0	0	0	0	1.73317	0	0	0	0	0	0	0
mmu-miR-804	chr11	50357799	50357820	-	21	-1.07363	0.760812	0.975205	maintain	2	0	0	0	0	0	0	0	1.73317	0	0	0	0	0	0	0
mmu-miR-3109-5p	chr9	69456958	69456981	+	23	-1.08913	0.754453	0.975205	maintain	1	0	0	1	0	0	0	0	0.866586	0	0	0.977618	0	0	0	0
mmu-miR-3113-3p	chrX	151859606	151859625	+	19	-1.08913	0.754453	0.975205	maintain	1	0	0	1	0	0	0	0	0.866586	0	0	0.977618	0	0	0	0
mmu-miR-6387	chr12	15801064	15801085	-	21	-1.08913	0.754453	0.975205	maintain	1	0	0	1	0	0	0	0	0.866586	0	0	0.977618	0	0	0	0
mmu-miR-718	chrX	74023857	74023877	-	20	-1.08913	0.754453	0.975205	maintain	1	0	0	1	0	0	0	0	0.866586	0	0	0.977618	0	0	0	0
mmu-miR-7058-5p	chr7	126368013	126368036	-	23	-1.09269	0.105653	0.975205	maintain	12	9	8	9	1	8	1	4	10.399	7.53137	6.28082	8.79857	1.31801	8.38823	1.26353	3.90349
mmu-miR-7676-5p	chr15;chr15	78284827;78348599	78284849;78348621	-;+	22;22	-1.09832	0.412742	0.975205	maintain	10	2	0	4	2	0	0	4	8.66586	1.67364	0	3.91047	2.63601	0	0	3.90349
mmu-miR-1964-5p	chr7	29773305	29773326	+	21	-1.10441	0.612766	0.975205	maintain	1	0	5	0	0	2	0	0	0.866586	0	3.92551	0	0	2.09706	0	0
mmu-miR-1982-3p	chr10	80828848	80828870	+	22	-1.1049	0.13624	0.975205	maintain	6	7	7	15	0	6	3	4	5.19952	5.85773	5.49572	14.6643	0	6.29117	3.7906	3.90349
mmu-miR-6947-5p	chr14	29988893	29988913	+	20	-1.1088	0.276324	0.975205	maintain	5	1	4	4	1	1	1	2	4.33293	0.836818	3.14041	3.91047	1.31801	1.04853	1.26353	1.95174
mmu-miR-7089-3p	chr9	109889689	109889710	+	21	-1.12398	0.340208	0.975205	maintain	3	4	2	3	1	0	3	0	2.59976	3.34727	1.5702	2.93286	1.31801	0	3.7906	0
mmu-miR-12188-5p	chr17	25160503	25160526	+	23	-1.14062	0.746056	0.975205	maintain	0	0	0	2	0	0	0	0	0	0	0	1.95524	0	0	0	0
mmu-miR-653-5p	chr6	3721355	3721375	-	20	-1.14062	0.746056	0.975205	maintain	0	0	0	2	0	0	0	0	0	0	0	1.95524	0	0	0	0
mmu-miR-7019-3p	chr4	138316132	138316154	-	22	-1.14062	0.746056	0.975205	maintain	0	0	0	2	0	0	0	0	0	0	0	1.95524	0	0	0	0
mmu-miR-7080-5p	chr8	123130106	123130128	+	22	-1.14062	0.746056	0.975205	maintain	0	0	0	2	0	0	0	0	0	0	0	1.95524	0	0	0	0
mmu-miR-6938-3p	chr12	85245923	85245944	-	21	-1.14502	0.428996	0.975205	maintain	2	3	4	0	0	2	1	0	1.73317	2.51046	3.14041	0	0	2.09706	1.26353	0
mmu-miR-291a-5p	chr7	3218932	3218953	+	21	-1.14625	0.480862	0.975205	maintain	1	1	2	2	0	0	2	0	0.866586	0.836818	1.5702	1.95524	0	0	2.52707	0
mmu-miR-3062-5p	chr11	68990638	68990659	-	21	-1.16696	0.124404	0.975205	maintain	6	5	11	5	2	4	2	1	5.19952	4.18409	8.63612	4.88809	2.63601	4.19411	2.52707	0.975872
mmu-miR-6964-5p	chr16	97877266	97877286	-	20	-1.16821	0.481001	0.975205	maintain	0	3	2	1	0	0	1	1	0	2.51046	1.5702	0.977618	0	0	1.26353	0.975872
mmu-miR-7081-3p	chr9	20914091	20914112	-	21	-1.17952	0.440548	0.975205	maintain	2	1	2	1	1	0	0	1	1.73317	0.836818	1.5702	0.977618	1.31801	0	0	0.975872
mmu-miR-7118-3p	chr15	89162849	89162870	-	21	-1.2308	0.458133	0.975205	maintain	3	1	0	2	1	0	0	1	2.59976	0.836818	0	1.95524	1.31801	0	0	0.975872
mmu-miR-7656-3p	chr9	94751869	94751890	+	21	-1.23862	0.232119	0.975205	maintain	1	6	3	8	0	3	2	1	0.866586	5.02091	2.35531	7.82095	0	3.14559	2.52707	0.975872
mmu-miR-8091	chr19	41588691	41588712	+	21	-1.25197	0.375085	0.975205	maintain	4	0	1	4	1	1	0	1	3.46634	0	0.785102	3.91047	1.31801	1.04853	0	0.975872
mmu-miR-7085-3p	chr9	44400465	44400486	+	21	-1.26428	0.521592	0.975205	maintain	1	1	2	0	1	0	0	0	0.866586	0.836818	1.5702	0	1.31801	0	0	0
mmu-miR-665-3p	chr12	109586368	109586387	+	19	-1.27531	0.582801	0.975205	maintain	0	0	3	1	0	1	0	0	0	0	2.35531	0.977618	0	1.04853	0	0
mmu-miR-504-3p	chrX	59097669	59097690	-	21	-1.27929	0.64429	0.975205	maintain	0	4	0	0	0	0	1	0	0	3.34727	0	0	0	0	1.26353	0
mmu-miR-6946-3p	chr14	20690684	20690703	+	19	-1.2949	0.328833	0.975205	maintain	3	5	1	6	0	5	0	0	2.59976	4.18409	0.785102	5.86571	0	5.24264	0	0
mmu-miR-1298-5p	chrX	147064918	147064939	+	21	-1.32813	0.309179	0.975205	maintain	4	3	2	1	1	2	0	0	3.46634	2.51046	1.5702	0.977618	1.31801	2.09706	0	0
mmu-miR-7012-3p	chr3	90270191	90270212	+	21	-1.33478	0.378175	0.975205	maintain	4	1	0	4	0	1	0	2	3.46634	0.836818	0	3.91047	0	1.04853	0	1.95174
mmu-miR-411-3p	chr12	109710225	109710246	+	21	-1.33571	0.282998	0.975205	maintain	2	6	6	0	1	2	1	0	1.73317	5.02091	4.71061	0	1.31801	2.09706	1.26353	0
mmu-miR-6897-3p	chr1	36144252	36144272	-	20	-1.38064	0.441983	0.975205	maintain	2	0	4	1	0	2	0	0	1.73317	0	3.14041	0.977618	0	2.09706	0	0
mmu-miR-7035-3p	chr5	136105583	136105603	+	20	-1.42058	0.375002	0.975205	maintain	0	2	3	2	0	1	0	1	0	1.67364	2.35531	1.95524	0	1.04853	0	0.975872
mmu-miR-7655-3p	chr2	18057882	18057903	+	21	-1.47562	0.269595	0.975205	maintain	10	4	1	0	1	2	1	0	8.66586	3.34727	0.785102	0	1.31801	2.09706	1.26353	0
mmu-miR-183-3p	chr6	30169672	30169693	-	21	-1.53049	0.285721	0.975205	maintain	0	2	4	5	1	0	0	2	0	1.67364	3.14041	4.88809	1.31801	0	0	1.95174
mmu-miR-379-3p	chr12	109709102	109709123	+	21	-1.53065	0.423622	0.975205	maintain	0	1	7	0	0	1	0	1	0	0.836818	5.49572	0	0	1.04853	0	0.975872
mmu-miR-470-5p	chrX	66813995	66814017	-	22	-1.54846	0.625625	0.975205	maintain	1	0	2	0	0	0	0	0	0.866586	0	1.5702	0	0	0	0	0
mmu-miR-7031-5p	chr5	121819246	121819268	-	22	-1.55039	0.230912	0.975205	maintain	2	6	3	1	0	1	2	0	1.73317	5.02091	2.35531	0.977618	0	1.04853	2.52707	0
mmu-miR-6939-3p	chr12	112659277	112659296	-	19	-1.55597	0.282775	0.975205	maintain	3	2	2	1	1	0	1	0	2.59976	1.67364	1.5702	0.977618	1.31801	0	1.26353	0
mmu-miR-1247-5p	chr12	110278094	110278115	-	21	-1.5664	0.171761	0.975205	maintain	1	8	3	15	4	3	0	0	0.866586	6.69455	2.35531	14.6643	5.27202	3.14559	0	0
mmu-miR-5617-3p	chrX	20863126	20863146	-	20	-1.58424	0.649632	0.975205	maintain	0	3	0	0	0	0	0	0	0	2.51046	0	0	0	0	0	0
mmu-miR-7048-3p	chr7	25217668	25217688	-	20	-1.59622	0.0976014	0.969042	maintain	3	7	7	3	0	1	2	2	2.59976	5.85773	5.49572	2.93286	0	1.04853	2.52707	1.95174
mmu-miR-5625-3p	chr5	30647991	30648015	+	24	-1.597	0.283098	0.975205	maintain	2	4	1	1	0	0	1	1	1.73317	3.34727	0.785102	0.977618	0	0	1.26353	0.975872
mmu-miR-5709-3p	chr17	67026162	67026183	-	21	-1.6014	0.403084	0.975205	maintain	0	1	3	1	1	0	0	0	0	0.836818	2.35531	0.977618	1.31801	0	0	0
mmu-miR-546	chr10	126998471	126998486	+	15	-1.60174	0.609879	0.975205	maintain	0	0	2	1	0	0	0	0	0	0	1.5702	0.977618	0	0	0	0
mmu-miR-6898-3p	chr1	36348688	36348708	-	20	-1.60174	0.609879	0.975205	maintain	0	0	2	1	0	0	0	0	0	0	1.5702	0.977618	0	0	0	0
mmu-miR-6974-5p	chr17	35204534	35204557	-	23	-1.60174	0.609879	0.975205	maintain	0	0	2	1	0	0	0	0	0	0	1.5702	0.977618	0	0	0	0
mmu-miR-12185-3p	chr14	63150292	63150313	-	21	-1.61438	0.606343	0.975205	maintain	2	1	0	0	0	0	0	0	1.73317	0.836818	0	0	0	0	0	0
mmu-miR-7685-3p	chr2	158243504	158243524	-	20	-1.61438	0.606343	0.975205	maintain	2	1	0	0	0	0	0	0	1.73317	0.836818	0	0	0	0	0	0
mmu-miR-1199-5p	chr8	84011594	84011613	-	19	-1.61865	0.243579	0.975205	maintain	6	5	0	1	1	1	0	1	5.19952	4.18409	0	0.977618	1.31801	1.04853	0	0.975872
mmu-miR-129-1-3p	chr6	29022667	29022688	+	21	-1.62452	0.128606	0.975205	maintain	3	3	6	7	0	1	0	4	2.59976	2.51046	4.71061	6.84333	0	1.04853	0	3.90349
mmu-miR-206-3p	chr1	20679055	20679076	+	21	-1.62607	0.527072	0.975205	maintain	0	1	1	1	0	0	0	0	0	0.836818	0.785102	0.977618	0	0	0	0
mmu-miR-7650-5p	chr9	15312611	15312632	+	21	-1.63402	0.298328	0.975205	maintain	1	3	1	3	0	2	0	0	0.866586	2.51046	0.785102	2.93286	0	2.09706	0	0
mmu-miR-8113	chr6	125234756	125234777	-	21	-1.6353	0.451529	0.975205	maintain	0	0	3	2	0	0	1	0	0	0	2.35531	1.95524	0	0	1.26353	0
mmu-miR-702-5p	chr5	136991442	136991462	+	20	-1.63901	0.522908	0.975205	maintain	1	0	1	1	0	0	0	0	0.866586	0	0.785102	0.977618	0	0	0	0
mmu-miR-1231-3p	chr1	135454603	135454625	-	22	-1.64142	0.338504	0.975205	maintain	2	1	1	1	1	0	0	0	1.73317	0.836818	0.785102	0.977618	1.31801	0	0	0
mmu-miR-6959-3p	chr15	89305658	89305679	-	21	-1.64148	0.342377	0.975205	maintain	2	1	1	1	0	1	0	0	1.73317	0.836818	0.785102	0.977618	0	1.04853	0	0
mmu-miR-1894-5p	chr17	35917899	35917920	+	21	-1.65169	0.595295	0.975205	maintain	0	2	0	1	0	0	0	0	0	1.67364	0	0.977618	0	0	0	0
mmu-miR-1900	chr9	21032261	21032282	-	21	-1.65169	0.595295	0.975205	maintain	0	2	0	1	0	0	0	0	0	1.67364	0	0.977618	0	0	0	0
mmu-miR-224-3p	chrX	72261037	72261058	-	21	-1.65169	0.595295	0.975205	maintain	0	2	0	1	0	0	0	0	0	1.67364	0	0.977618	0	0	0	0
mmu-miR-7647-5p	chr5	123522674	123522695	-	21	-1.67927	0.237675	0.975205	maintain	1	6	1	7	0	0	0	4	0.866586	5.02091	0.785102	6.84333	0	0	0	3.90349
mmu-miR-432	chr12	109595006	109595028	+	22	-1.69144	0.583526	0.975205	maintain	0	0	1	2	0	0	0	0	0	0	0.785102	1.95524	0	0	0	0
mmu-miR-5710	chr9	54708317	54708338	+	21	-1.72866	0.572684	0.975205	maintain	1	0	0	2	0	0	0	0	0.866586	0	0	1.95524	0	0	0	0
mmu-miR-7227-3p	chr4	133717050	133717071	-	21	-1.73042	0.156307	0.975205	maintain	5	2	3	3	0	2	1	0	4.33293	1.67364	2.35531	2.93286	0	2.09706	1.26353	0
mmu-miR-1971	chr14	78191451	78191468	-	17	-1.73724	0.438999	0.975205	maintain	0	0	1	4	0	0	0	1	0	0	0.785102	3.91047	0	0	0	0.975872
mmu-miR-409-5p	chr12	109743172	109743194	+	22	-1.75601	0.163429	0.975205	maintain	3	3	7	1	2	0	0	1	2.59976	2.51046	5.49572	0.977618	2.63601	0	0	0.975872
mmu-miR-7002-5p	chr2	114150547	114150567	-	20	-1.7804	0.308048	0.975205	maintain	0	5	3	1	0	0	0	2	0	4.18409	2.35531	0.977618	0	0	0	1.95174
mmu-miR-376a-3p	chr12	109723824	109723844	+	20	-1.78298	0.607809	0.975205	maintain	0	0	0	3	0	0	0	0	0	0	0	2.93286	0	0	0	0
mmu-miR-12197-3p	chr5	21673874	21673891	-	17	-1.79676	0.207606	0.975205	maintain	2	3	1	3	1	0	0	1	1.73317	2.51046	0.785102	2.93286	1.31801	0	0	0.975872
mmu-miR-6962-5p	chr15	101193874	101193893	+	19	-1.841	0.39147	0.975205	maintain	0	4	2	0	0	1	0	0	0	3.34727	1.5702	0	0	1.04853	0	0
mmu-miR-6903-3p	chr1	133726564	133726583	-	19	-1.87323	0.268032	0.975205	maintain	1	1	3	1	0	0	0	1	0.866586	0.836818	2.35531	0.977618	0	0	0	0.975872
mmu-miR-3075-5p	chr14	25534451	25534471	+	20	-1.87329	0.267069	0.975205	maintain	1	1	3	1	0	1	0	0	0.866586	0.836818	2.35531	0.977618	0	1.04853	0	0
mmu-miR-6998-3p	chr2	31612462	31612483	+	21	-1.88094	0.376274	0.975205	maintain	0	0	4	2	0	0	1	0	0	0	3.14041	1.95524	0	0	1.26353	0
mmu-miR-7648-3p	chr15	90224392	90224412	+	20	-1.89702	0.0801464	0.935211	maintain	6	3	7	3	0	1	0	3	5.19952	2.51046	5.49572	2.93286	0	1.04853	0	2.92762
mmu-miR-6955-3p	chr15	78891891	78891912	+	21	-1.91472	0.580696	0.975205	maintain	0	0	4	0	0	0	0	0	0	0	3.14041	0	0	0	0	0
mmu-miR-6914-3p	chr10	128382882	128382900	+	18	-1.95596	0.28925	0.975205	maintain	2	0	1	3	0	0	0	1	1.73317	0	0.785102	2.93286	0	0	0	0.975872
mmu-miR-3109-3p	chr9	69456997	69457017	+	20	-1.95771	0.132596	0.975205	maintain	0	7	3	5	0	1	1	1	0	5.85773	2.35531	4.88809	0	1.04853	1.26353	0.975872
mmu-miR-7240-3p	chr8	70798172	70798192	+	20	-1.99797	0.563837	0.975205	maintain	0	4	0	0	0	0	0	0	0	3.34727	0	0	0	0	0	0
mmu-miR-770-3p	chr12	109563744	109563765	+	21	-1.99797	0.563837	0.975205	maintain	0	4	0	0	0	0	0	0	0	3.34727	0	0	0	0	0	0
mmu-miR-7a-2-3p	chr7	78888335	78888356	+	21	-2.01361	0.488513	0.975205	maintain	3	0	1	0	0	0	0	0	2.59976	0	0.785102	0	0	0	0	0
mmu-miR-7009-5p	chr3	36475498	36475519	-	21	-2.03285	0.482976	0.975205	maintain	3	1	0	0	0	0	0	0	2.59976	0.836818	0	0	0	0	0	0
mmu-miR-3085-3p	chr19	42280095	42280115	-	20	-2.04524	0.334052	0.975205	maintain	2	0	5	0	0	0	0	1	1.73317	0	3.92551	0	0	0	0	0.975872
mmu-miR-6916-3p	chr10	128511968	128511989	-	21	-2.10783	0.241938	0.975205	maintain	1	0	4	2	0	0	1	0	0.866586	0	3.14041	1.95524	0	0	1.26353	0
mmu-miR-7008-3p	chr3	31039007	31039028	+	21	-2.12632	0.180175	0.975205	maintain	1	2	2	2	0	1	0	0	0.866586	1.67364	1.5702	1.95524	0	1.04853	0	0
mmu-miR-325-5p	chrX	105379142	105379164	-	22	-2.1299	0.455001	0.975205	maintain	0	0	1	3	0	0	0	0	0	0	0.785102	2.93286	0	0	0	0
mmu-miR-6904-3p	chr1	180587243	180587260	+	17	-2.20259	0.523376	0.975205	maintain	0	0	0	4	0	0	0	0	0	0	0	3.91047	0	0	0	0
mmu-miR-6901-3p	chr1	93274585	93274604	+	19	-2.26615	0.41571	0.975205	maintain	1	0	4	0	0	0	0	0	0.866586	0	3.14041	0	0	0	0	0
mmu-miR-7021-3p	chr4	143136100	143136121	-	21	-2.28738	0.126336	0.975205	maintain	1	2	1	8	0	1	0	1	0.866586	1.67364	0.785102	7.82095	0	1.04853	0	0.975872
mmu-miR-6953-3p	chr15	76248235	76248258	+	23	-2.3054	0.404912	0.975205	maintain	0	4	1	0	0	0	0	0	0	3.34727	0.785102	0	0	0	0	0
mmu-miR-539-5p	chr12	109728136	109728157	+	21	-2.31907	0.501	0.975205	maintain	0	5	0	0	0	0	0	0	0	4.18409	0	0	0	0	0	0
mmu-miR-7048-5p	chr7	25217699	25217720	-	21	-2.3572	0.380432	0.975205	maintain	0	0	3	2	0	0	0	0	0	0	2.35531	1.95524	0	0	0	0
mmu-miR-741-3p	chrX	66796809	66796831	-	22	-2.39735	0.379996	0.975205	maintain	4	0	0	1	0	0	0	0	3.46634	0	0	0.977618	0	0	0	0
mmu-miR-7026-3p	chr5	110666075	110666097	-	22	-2.46816	0.105358	0.975205	maintain	2	4	2	1	1	0	0	0	1.73317	3.34727	1.5702	0.977618	1.31801	0	0	0
mmu-miR-7058-3p	chr7	126367971	126367992	-	21	-2.55751	0.324766	0.975205	maintain	0	4	2	0	0	0	0	0	0	3.34727	1.5702	0	0	0	0	0
mmu-miR-681	chr12	69763923	69763943	-	20	-2.58135	0.237983	0.975205	maintain	1	4	1	0	0	0	0	0	0.866586	3.34727	0.785102	0	0	0	0	0
mmu-miR-7673-5p	chrX	94274574	94274595	+	21	-2.6084	0.133231	0.975205	maintain	3	6	1	0	0	1	0	0	2.59976	5.02091	0.785102	0	0	1.04853	0	0
mmu-miR-7071-3p	chr8	88138254	88138274	+	20	-2.61092	0.203173	0.975205	maintain	2	0	0	7	0	1	0	0	1.73317	0	0	6.84333	0	1.04853	0	0
mmu-miR-196a-1-3p	chr11	96265225	96265246	+	21	-2.65043	0.0693676	0.844079	maintain	2	3	2	3	0	0	0	1	1.73317	2.51046	1.5702	2.93286	0	0	0	0.975872
mmu-miR-7069-3p	chr8	84867987	84868007	+	20	-2.82256	0.170954	0.975205	maintain	4	2	1	0	0	0	0	0	3.46634	1.67364	0.785102	0	0	0	0	0
mmu-miR-5616-3p	chr4	149537901	149537922	+	21	-2.82381	0.110193	0.975205	maintain	1	3	2	1	0	0	0	0	0.866586	2.51046	1.5702	0.977618	0	0	0	0
mmu-miR-486b-5p	chr8	23142627	23142648	-	21	-2.8295	0.101384	0.975205	maintain	2	2	2	1	0	0	0	0	1.73317	1.67364	1.5702	0.977618	0	0	0	0
mmu-miR-5709-5p	chr17	67026197	67026218	-	21	-2.8964	0.0568509	0.753087	maintain	1	1	6	4	0	0	1	0	0.866586	0.836818	4.71061	3.91047	0	0	1.26353	0
mmu-miR-7052-3p	chr7	44470391	44470411	+	20	-2.90827	0.152504	0.975205	maintain	3	1	0	3	0	0	0	0	2.59976	0.836818	0	2.93286	0	0	0	0
mmu-miR-138-2-3p	chr8	94324359	94324379	+	20	-2.91926	0.15425	0.975205	maintain	2	0	1	4	0	0	0	0	1.73317	0	0.785102	3.91047	0	0	0	0
mmu-miR-467a-3p	chr2;chr2;chr2;chr2;chr2;chr2;chr2;chr2;chr2;chr2	10476390;10478847;10483727;10486184;10488648;10491097;10493559;10496029;10498442;10503322	10476411;10478868;10483748;10486205;10488669;10491118;10493580;10496050;10498463;10503343	+;+;+;+;+;+;+;+;+;+	21;21;21;21;21;21;21;21;21;21	-3.36573	0.251398	0.975205	maintain	10	0	0	0	0	0	0	0	8.66586	0	0	0	0	0	0	0
mmu-miR-361-3p	chrX	113074827	113074851	-	24	-0.285336	6.82711e-05	0.0150223	down	7460	8427	8448	7172	4183	5029	4394	6093	6464.73	7051.87	6632.54	7011.48	5513.22	5273.05	5551.97	5945.99
mmu-miR-467a-5p	chr2;chr2;chr2;chr2;chr2;chr2;chr2;chr2;chr2;chr2	10476355;10478812;10483692;10486149;10488613;10491062;10493524;10495994;10498407;10503287	10476376;10478833;10483713;10486170;10488634;10491083;10493545;10496015;10498428;10503308	+;+;+;+;+;+;+;+;+;+	21;21;21;21;21;21;21;21;21;21	-0.309402	0.0035991	0.156336	down	40390	50350	47220	38550	23300	33636	23106	28080	35001.4	42133.8	37072.5	37687.2	30709.5	35268.3	29195.2	27402.5
mmu-miR-467b-5p	chr2	10481256	10481276	+	20	-0.309408	0.004044	0.165328	down	4041	5036	4725	3856	2330	3366	2310	2811	3501.87	4214.22	3709.61	3769.7	3070.95	3529.35	2918.76	2743.18
mmu-miR-30d-5p	chr15	68341257	68341278	-	21	-0.332949	0.0112581	0.320576	down	111926	155091	142929	121571	73370	100128	66946	79117	96993.5	129783	112214	118850	96702.1	104987	84588.6	77208.1
mmu-miR-191-5p	chr9	108568325	108568347	+	22	-0.333372	0.0014188	0.113445	down	148018	156686	175044	135440	73420	119750	76757	103207	128270	131118	137427	132409	96768	125561	96985.1	100717
mmu-miR-3963	chr3	151023839	151023857	-	18	-0.381796	0.0121489	0.32475	down	36588	51918	56513	48758	21833	36052	22235	34470	31706.6	43445.9	44368.5	47666.7	28776	37801.6	28094.7	33638.3
mmu-let-7a-1-3p	chr13	48538188	48538209	-	21	-0.395658	0.0014849	0.113445	down	1562	1792	1425	1492	752	1099	730	1085	1353.61	1499.58	1118.77	1458.61	991.14	1152.33	922.38	1058.82
mmu-let-7c-2-3p	chr15	85706664	85706685	+	21	-0.398309	0.00156016	0.113445	down	1550	1791	1414	1481	745	1095	724	1075	1343.21	1498.74	1110.13	1447.85	981.914	1148.14	914.799	1049.06
mmu-miR-423-3p	chr11	77078086	77078108	-	22	-0.401414	0.00548328	0.211715	down	18454	25795	31023	25221	12462	17168	12645	15530	15992	21585.7	24356.2	24656.5	16425	18001.1	15977.4	15155.3
mmu-miR-532-3p	chrX	7248419	7248440	-	21	-0.408146	0.00372025	0.156701	down	204	224	247	224	127	132	105	151	176.784	187.447	193.92	218.987	167.387	138.406	132.671	147.357
mmu-miR-1191a	chr7	27205615	27205635	+	20	-0.413049	0.00748377	0.256642	down	422	518	443	462	230	336	244	243	365.699	433.472	347.8	451.66	303.141	352.306	308.302	237.137
mmu-miR-484	chr16	14159630	14159651	+	21	-0.415788	0.0126975	0.326706	down	1922	2675	1883	1903	1119	1252	832	1628	1665.58	2238.49	1478.35	1860.41	1474.85	1312.76	1051.26	1588.72
mmu-miR-149-5p	chr1	92850381	92850403	+	22	-0.418612	0.00328237	0.156336	down	1168	1641	1570	1475	797	946	622	980	1012.17	1373.22	1232.61	1441.99	1050.45	991.908	785.918	956.355
mmu-miR-340-3p	chr11	50069762	50069783	+	21	-0.465476	0.00164584	0.113445	down	2131	3020	3185	2655	1182	1942	1171	1826	1846.69	2527.19	2500.55	2595.58	1557.88	2036.24	1479.6	1781.94
mmu-miR-671-3p	chr5	24592171	24592191	+	20	-0.467967	0.0241085	0.429626	down	424	700	731	704	296	468	240	426	367.432	585.773	573.91	688.243	390.13	490.711	303.248	415.722
mmu-miR-212-5p	chr11	75173403	75173425	+	22	-0.480197	0.0326277	0.539911	down	86	110	124	107	52	78	56	45	74.5264	92.05	97.3527	104.605	68.5363	81.7852	70.7579	43.9142
mmu-miR-155-3p	chr16	84714182	84714202	+	20	-0.481094	0.0141565	0.339165	down	78	90	83	76	36	48	37	58	67.5937	75.3137	65.1635	74.299	47.4482	50.3294	46.7508	56.6006
mmu-miR-328-3p	chr8	105308379	105308400	-	21	-0.50078	0.0133973	0.326706	down	1406	2030	2249	2490	1148	1109	820	1350	1218.42	1698.74	1765.7	2434.27	1513.07	1162.82	1036.1	1317.43
mmu-miR-211-5p	chr7	64205831	64205852	+	21	-0.532978	0.0193165	0.378169	down	500	831	717	719	357	520	214	377	433.293	695.396	562.918	702.908	470.528	545.235	270.396	367.904
mmu-miR-664-3p	chr1	185243012	185243033	+	21	-0.535721	0.0226628	0.409107	down	100	205	177	133	86	77	59	98	86.6586	171.548	138.963	130.023	113.348	80.7367	74.5485	95.6355
mmu-miR-708-5p	chr7	96249450	96249472	+	22	-0.543341	0.000284767	0.0395826	down	211	221	254	175	89	114	124	118	182.85	184.937	199.416	171.083	117.302	119.532	156.678	115.153
mmu-miR-204-5p	chr19	22750610	22750631	+	21	-0.566651	0.0132895	0.326706	down	479	785	673	665	326	483	193	347	415.095	656.902	528.374	650.116	429.67	506.439	243.862	338.628
mmu-miR-708-3p	chr7	96249496	96249517	+	21	-0.569693	0.000528292	0.0667569	down	446	571	506	375	214	191	237	324	386.497	477.823	397.262	366.607	282.053	200.269	299.458	316.183
mmu-miR-7043-3p	chr6	116645978	116645998	-	20	-0.579147	0.00230294	0.133378	down	169	277	209	227	85	136	97	136	146.453	231.799	164.086	221.919	112.03	142.6	122.563	132.719
mmu-miR-296-5p	chr2	174267093	174267113	-	20	-0.583076	0.0192992	0.378169	down	104	129	171	164	66	92	74	54	90.1249	107.95	134.252	160.329	86.9884	96.4646	93.5015	52.6971
mmu-miR-674-3p	chr2	117185186	117185207	+	21	-0.593561	0.0143962	0.339165	down	236	419	454	428	180	277	128	196	204.514	350.627	356.436	418.421	237.241	290.442	161.732	191.271
mmu-miR-692	chr13;chr17;chr4	74407121;6895259;125504805	74407141;6895279;125504825	+;-;+	20;20;20	-0.629396	0.0374047	0.584186	down	143	193	167	95	30	68	77	123	123.922	161.506	131.112	92.8737	39.5402	71.2999	97.2921	120.032
mmu-miR-8112	chr6	71271745	71271764	+	19	-0.644822	0.0116927	0.320576	down	59	96	77	87	41	32	40	41	51.1286	80.3346	60.4529	85.0528	54.0382	33.5529	50.5414	40.0108
mmu-miR-1843b-3p	chr1	159340400	159340419	+	19	-0.654424	0.0172179	0.373951	down	160	258	219	200	92	165	49	104	138.654	215.899	171.937	195.524	121.257	173.007	61.9132	101.491
mmu-miR-6989-3p	chr19	6346523	6346544	+	21	-0.658757	0.00268017	0.143286	down	68	109	94	93	38	52	36	50	58.9278	91.2132	73.7996	90.9185	50.0842	54.5235	45.4872	48.7936
mmu-miR-3060-3p	chr11	4139413	4139434	+	21	-0.661041	0.0345354	0.551772	down	50	33	37	35	20	22	17	15	43.3293	27.615	29.0488	34.2166	26.3601	23.0676	21.4801	14.6381
mmu-miR-128-3p	chr1;chr9	128202404;112118644	128202424;112118664	+;-	20;20	-0.664868	0.00149451	0.113445	down	26770	45917	41144	41358	17103	26768	13899	16984	23198.5	38424.2	32302.2	40432.3	22541.8	28067	17561.9	16574.2
mmu-miR-5100	chr11	60728698	60728718	+	20	-0.671097	0.00470522	0.186864	down	1248	2448	2462	2323	946	1293	606	1267	1081.5	2048.53	1932.92	2271.01	1246.83	1355.75	765.702	1236.43
mmu-miR-335-3p	chr6	30741354	30741375	+	21	-0.705024	0.03404	0.550182	down	67	105	58	75	46	38	15	44	58.0613	87.8659	45.5359	73.3214	60.6283	39.8441	18.953	42.9384
mmu-miR-1981-3p	chr1	184822409	184822429	-	20	-0.717767	0.012948	0.326706	down	39	73	53	53	20	30	17	35	33.7969	61.0877	41.6104	51.8138	26.3601	31.4559	21.4801	34.1555
mmu-miR-7219-3p	chr18	68260920	68260940	-	20	-0.753453	0.00614714	0.230933	down	52	67	61	67	18	36	18	42	45.0625	56.0668	47.8912	65.5004	23.7241	37.747	22.7436	40.9866
mmu-miR-130b-5p	chr16	17124109	17124130	-	21	-0.765429	0.000897105	0.0959212	down	337	426	418	473	135	277	111	241	292.039	356.485	328.173	462.413	177.931	290.442	140.252	235.185
mmu-miR-5107-3p	chr18	60812130	60812151	+	21	-0.809797	0.00349352	0.156336	down	49	65	85	70	19	44	22	33	42.4627	54.3932	66.7337	68.4333	25.0421	46.1353	27.7978	32.2038
mmu-miR-1964-3p	chr7	29773344	29773365	+	21	-0.846578	2.2743e-05	0.00773751	down	941	1513	1592	1509	555	778	410	622	815.457	1266.11	1249.88	1475.23	731.493	815.755	518.049	606.993
mmu-miR-7661-3p	chr6	108489782	108489803	+	21	-0.982492	0.0472599	0.677229	down	18	12	14	13	6	7	3	6	15.5985	10.0418	10.9914	12.709	7.90803	7.3397	3.7906	5.85523
mmu-miR-511-3p	chr2	14261051	14261072	+	21	-1.00286	0.00220772	0.133378	down	38	60	38	47	9	20	21	20	32.9303	50.2091	29.8339	45.9481	11.862	20.9706	26.5342	19.5174
mmu-miR-6956-3p	chr15	79002265	79002284	+	19	-1.11332	0.0169628	0.373951	down	12	19	20	22	5	9	4	8	10.399	15.8995	15.702	21.5076	6.59003	9.43676	5.05414	7.80698
mmu-miR-511-5p	chr2	14261013	14261033	+	20	-1.40077	0.00757001	0.256642	down	9	24	30	24	5	11	5	4	7.79927	20.0836	23.5531	23.4628	6.59003	11.5338	6.31767	3.90349
mmu-miR-3102-3p.2-3p	chr7	100882330	100882350	-	20	-1.92926	0.018759	0.378169	down	6	8	10	6	0	2	2	2	5.19952	6.69455	7.85102	5.86571	0	2.09706	2.52707	1.95174
mmu-miR-3066-3p	chr12	17355441	17355462	+	21	-2.70396	0.037392	0.584186	down	5	7	2	3	0	1	0	1	4.33293	5.85773	1.5702	2.93286	0	1.04853	0	0.975872
