# Supplementary material for: The Effect of Immunosuppressive Adjuvant Kynurenine on Type 1 Diabetes Vaccine
Source: Front Immunol. 2021 Jul 7;12:681328. doi: 10.3389/fimmu.2021.681328 (PMC8293994; doi:10.3389/fimmu.2021.681328)
Supplement: Supplementary Table 4 — Gene Ontology analysis for the target gene of differentially expressed miRNA. [file Table_4.xls]

## Sheet: 上调基因显著性功能
go_id	go_name	go_diffgene_count	go_gene_count	enrichment	pvalue	FDR
GO:0006412	translation	59	264	23.9129	4.89117e-62	1.23893e-58
GO:0002181	cytoplasmic translation	18	42	45.8571	2.71839e-25	3.44284e-22
GO:0000122	negative regulation of transcription by RNA polymerase II	46	888	5.54279	6.42311e-20	5.42325e-17
GO:0045892	negative regulation of transcription, DNA-templated	31	541	6.13124	7.97973e-15	4.14922e-12
GO:0045944	positive regulation of transcription by RNA polymerase II	45	1160	4.15086	8.19034e-15	4.14922e-12
GO:0045893	positive regulation of transcription, DNA-templated	32	619	5.5315	4.88406e-14	2.06189e-11
GO:0030154	cell differentiation	40	992	4.31452	8.89896e-14	3.22015e-11
GO:0006364	rRNA processing	17	140	12.9929	1.11768e-13	3.53886e-11
GO:0008380	RNA splicing	21	262	8.57634	4.58418e-13	1.29019e-10
GO:0000398	mRNA splicing, via spliceosome	17	156	11.6603	6.82489e-13	1.72874e-10
GO:0007049	cell cycle	30	621	5.16908	1.86374e-12	4.29169e-10
GO:0043066	negative regulation of apoptotic process	28	551	5.43739	3.36733e-12	7.10788e-10
GO:0006355	regulation of transcription, DNA-templated	39	1065	3.91831	3.71981e-12	7.24791e-10
GO:0043065	positive regulation of apoptotic process	22	356	6.61236	2.19919e-11	3.97896e-09
GO:0006397	mRNA processing	21	345	6.51304	8.83966e-11	1.49272e-08
GO:0007275	multicellular organism development	37	1096	3.61223	1.45986e-10	2.31114e-08
GO:0006357	regulation of transcription by RNA polymerase II	43	1493	3.08171	5.60744e-10	8.35509e-08
GO:0006915	apoptotic process	25	575	4.65217	1.48103e-09	2.08414e-07
GO:0010628	positive regulation of gene expression	24	537	4.78212	1.92626e-09	2.56801e-07
GO:0000027	ribosomal large subunit assembly	7	24	31.2083	7.28385e-09	9.225e-07
GO:0048511	rhythmic process	13	152	9.15132	9.91019e-09	1.19536e-06
GO:0042273	ribosomal large subunit biogenesis	7	26	28.8077	1.36208e-08	1.56825e-06
GO:0006366	transcription by RNA polymerase II	11	110	10.7	3.24081e-08	3.56912e-06
GO:0050728	negative regulation of inflammatory response	11	112	10.5089	3.92244e-08	4.13981e-06
GO:0016310	phosphorylation	23	587	4.1925	5.18105e-08	5.24944e-06
GO:0032981	mitochondrial respiratory chain complex I assembly	8	49	17.4694	7.19296e-08	7.0076e-06
GO:0035914	skeletal muscle cell differentiation	8	55	15.5636	1.84863e-07	1.73429e-05
GO:0043303	mast cell degranulation	5	13	41.1538	3.39985e-07	3.07565e-05
GO:0045444	fat cell differentiation	9	84	11.4643	4.07451e-07	3.55887e-05
GO:0030335	positive regulation of cell migration	14	251	5.96813	5.5888e-07	4.71881e-05
GO:0032496	response to lipopolysaccharide	10	117	9.1453	6.92839e-07	5.66117e-05
GO:0007165	signal transduction	31	1167	2.84233	1.23819e-06	9.80106e-05
GO:0006954	inflammatory response	16	357	4.79552	1.43309e-06	0.00011
GO:0008284	positive regulation of cell proliferation	20	551	3.88385	1.52212e-06	0.000113398
GO:0051726	regulation of cell cycle	10	130	8.23077	1.85648e-06	0.000134356
GO:0030968	endoplasmic reticulum unfolded protein response	7	51	14.6863	1.958e-06	0.000137767
GO:0032088	negative regulation of NF-kappaB transcription factor activity	8	75	11.4133	2.17406e-06	0.000148835
GO:0042274	ribosomal small subunit biogenesis	5	19	28.1579	2.93228e-06	0.00019546
GO:0043433	negative regulation of DNA-binding transcription factor activity	8	81	10.5679	3.94606e-06	0.000256291
GO:0042127	regulation of cell proliferation	12	221	5.80995	5.73765e-06	0.000363337
GO:0016477	cell migration	13	266	5.22932	6.84044e-06	0.000422606
GO:0008033	tRNA processing	8	90	9.51111	8.83473e-06	0.000532819
GO:1901796	regulation of signal transduction by p53 class mediator	4	11	38.9091	9.47527e-06	0.000558159
GO:0000387	spliceosomal snRNP assembly	5	24	22.2917	1.03118e-05	0.00058044
GO:0071353	cellular response to interleukin-4	5	24	22.2917	1.03118e-05	0.00058044
GO:0090090	negative regulation of canonical Wnt signaling pathway	9	126	7.64286	1.2875e-05	0.000695941
GO:0071376	cellular response to corticotropin-releasing hormone stimulus	3	4	80.25	1.29132e-05	0.000695941
GO:0046034	ATP metabolic process	6	44	14.5909	1.36095e-05	0.000718182
GO:0042776	mitochondrial ATP synthesis coupled proton transport	4	12	35.6667	1.41075e-05	0.00072927
GO:0030308	negative regulation of cell growth	9	128	7.52344	1.46608e-05	0.000742716
GO:0051301	cell division	15	379	4.23483	1.51853e-05	0.000754205
GO:0001701	in utero embryonic development	14	333	4.4985	1.59666e-05	0.000777757
GO:0008283	cell proliferation	10	167	6.40719	1.80859e-05	0.000841672
GO:0006811	ion transport	19	593	3.42833	1.81038e-05	0.000841672
GO:0006629	lipid metabolic process	18	539	3.57328	1.82756e-05	0.000841672
GO:0090023	positive regulation of neutrophil chemotaxis	5	27	19.8148	1.91368e-05	0.000865601
GO:0007283	spermatogenesis	16	438	3.90868	2.01399e-05	0.000894988
GO:0002376	immune system process	17	491	3.70468	2.08763e-05	0.000903842
GO:0042254	ribosome biogenesis	8	101	8.47525	2.10528e-05	0.000903842
GO:0071222	cellular response to lipopolysaccharide	12	258	4.97674	2.81388e-05	0.00118793
GO:0007623	circadian rhythm	7	77	9.72727	3.2972e-05	0.00136915
GO:0015031	protein transport	19	620	3.27903	3.38827e-05	0.00138427
GO:0043524	negative regulation of neuron apoptotic process	10	180	5.94444	3.50518e-05	0.00140931
GO:0006417	regulation of translation	9	144	6.6875	3.8314e-05	0.0015164
GO:0045665	negative regulation of neuron differentiation	7	79	9.48101	3.91092e-05	0.00152405
GO:0006631	fatty acid metabolic process	10	186	5.75269	4.6675e-05	0.00179133
GO:0002098	tRNA wobble uridine modification	4	16	26.75	5.03491e-05	0.0019035
GO:0035335	peptidyl-tyrosine dephosphorylation	5	34	15.7353	6.24901e-05	0.00227145
GO:0032792	negative regulation of CREB transcription factor activity	3	6	53.5	6.36687e-05	0.00227145
GO:1901798	positive regulation of signal transduction by p53 class mediator	3	6	53.5	6.36687e-05	0.00227145
GO:1903208	negative regulation of hydrogen peroxide-induced neuron death	3	6	53.5	6.36687e-05	0.00227145
GO:0000028	ribosomal small subunit assembly	4	17	25.1765	6.53535e-05	0.00229917
GO:0046330	positive regulation of JNK cascade	7	86	8.7093	6.85211e-05	0.00237759
GO:0006974	cellular response to DNA damage stimulus	16	485	3.5299	7.07839e-05	0.00242291
GO:0032543	mitochondrial translation	5	35	15.2857	7.2345e-05	0.00244333
GO:0045595	regulation of cell differentiation	5	38	14.0789	0.000109302	0.0036429
GO:0006508	proteolysis	16	508	3.37008	0.000123513	0.00406309
GO:0050873	brown fat cell differentiation	5	40	13.375	0.000141095	0.00458197
GO:0042102	positive regulation of T cell proliferation	6	66	9.72727	0.000147192	0.00463553
GO:0042752	regulation of circadian rhythm	6	66	9.72727	0.000147192	0.00463553
GO:0071346	cellular response to interferon-gamma	7	97	7.72165	0.000149952	0.00463553
GO:0007204	positive regulation of cytosolic calcium ion concentration	9	171	5.63158	0.000150064	0.00463553
GO:0061469	regulation of type B pancreatic cell proliferation	3	8	40.125	0.000175797	0.00536498
GO:0006754	ATP biosynthetic process	4	22	19.4545	0.000193544	0.00583627
GO:0001764	neuron migration	8	138	6.2029	0.000204405	0.00609126
GO:0045787	positive regulation of cell cycle	5	44	12.1591	0.000225807	0.00651273
GO:1902895	positive regulation of pri-miRNA transcription by RNA polymerase II	5	44	12.1591	0.000225807	0.00651273
GO:0016567	protein ubiquitination	12	319	4.02508	0.000226261	0.00651273
GO:0043407	negative regulation of MAP kinase activity	5	45	11.8889	0.000252085	0.00717452
GO:0019941	modification-dependent protein catabolic process	3	9	35.6667	0.000261859	0.00736988
GO:0016311	dephosphorylation	7	108	6.93519	0.000297962	0.00829382
GO:0006955	immune response	13	385	3.61299	0.000336221	0.00871261
GO:0006879	cellular iron ion homeostasis	5	48	11.1458	0.00034524	0.00871261
GO:0048477	oogenesis	5	48	11.1458	0.00034524	0.00871261
GO:0002764	immune response-regulating signaling pathway	2	2	107	0.000348869	0.00871261
GO:0006850	mitochondrial pyruvate transmembrane transport	2	2	107	0.000348869	0.00871261
GO:0048021	regulation of melanin biosynthetic process	2	2	107	0.000348869	0.00871261
GO:0051343	positive regulation of cyclic-nucleotide phosphodiesterase activity	2	2	107	0.000348869	0.00871261
GO:0072573	tolerance induction to lipopolysaccharide	2	2	107	0.000348869	0.00871261
GO:0051092	positive regulation of NF-kappaB transcription factor activity	8	149	5.74497	0.000350626	0.00871261
GO:0034976	response to endoplasmic reticulum stress	6	77	8.33766	0.000352173	0.00871261
GO:0071356	cellular response to tumor necrosis factor	7	111	6.74775	0.000354308	0.00871261
GO:0000185	activation of MAPKKK activity	3	10	32.1	0.000371481	0.00871261
GO:0006122	mitochondrial electron transport, ubiquinol to cytochrome c	3	10	32.1	0.000371481	0.00871261
GO:0006123	mitochondrial electron transport, cytochrome c to oxygen	3	10	32.1	0.000371481	0.00871261
GO:0045654	positive regulation of megakaryocyte differentiation	3	10	32.1	0.000371481	0.00871261
GO:0045717	negative regulation of fatty acid biosynthetic process	3	10	32.1	0.000371481	0.00871261
GO:1990253	cellular response to leucine starvation	3	10	32.1	0.000371481	0.00871261
GO:0001649	osteoblast differentiation	6	78	8.23077	0.000378527	0.00879641
GO:0001934	positive regulation of protein phosphorylation	10	240	4.45833	0.000403616	0.00927452
GO:0070373	negative regulation of ERK1 and ERK2 cascade	6	79	8.12658	0.000406424	0.00927452
GO:0009636	response to toxic substance	5	50	10.7	0.000420673	0.00951397
GO:0048661	positive regulation of smooth muscle cell proliferation	6	80	8.025	0.00043593	0.00977178
GO:0006979	response to oxidative stress	7	116	6.4569	0.000467306	0.0102929
GO:0050829	defense response to Gram-negative bacterium	7	116	6.4569	0.000467306	0.0102929
GO:0006983	ER overload response	3	11	29.1818	0.000507233	0.0108883
GO:0034115	negative regulation of heterotypic cell-cell adhesion	3	11	29.1818	0.000507233	0.0108883
GO:1990440	positive regulation of transcription from RNA polymerase II promoter in response to endoplasmic reticulum stress	3	11	29.1818	0.000507233	0.0108883
GO:1900745	positive regulation of p38MAPK cascade	4	28	15.2857	0.000518166	0.0110295
GO:0001666	response to hypoxia	7	121	6.19008	0.000607952	0.0128329
GO:0042060	wound healing	6	86	7.46512	0.000650581	0.0135015
GO:0043280	positive regulation of cysteine-type endopeptidase activity involved in apoptotic process	5	55	9.72727	0.000664672	0.0135015
GO:0002237	response to molecule of bacterial origin	3	12	26.75	0.000671609	0.0135015
GO:0002690	positive regulation of leukocyte chemotaxis	3	12	26.75	0.000671609	0.0135015
GO:0032495	response to muramyl dipeptide	3	12	26.75	0.000671609	0.0135015
GO:2000273	positive regulation of signaling receptor activity	3	12	26.75	0.000671609	0.0135015
GO:0043153	entrainment of circadian clock by photoperiod	4	30	14.2667	0.000683351	0.0136293
GO:0070301	cellular response to hydrogen peroxide	5	56	9.55357	0.000724255	0.0143323
GO:0009611	response to wounding	6	88	7.29545	0.000738197	0.014495
GO:0071407	cellular response to organic cyclic compound	5	57	9.38596	0.000787826	0.0153505
GO:0006325	chromatin organization	11	312	3.77244	0.000800791	0.015484
GO:0007399	nervous system development	13	422	3.29621	0.000826865	0.015867
GO:0006165	nucleoside diphosphate phosphorylation	3	13	24.6923	0.000867023	0.0165126
GO:0006281	DNA repair	12	369	3.47967	0.000879148	0.0166185
GO:0002230	positive regulation of defense response to virus by host	4	33	12.9697	0.000997952	0.0185047
GO:0051603	proteolysis involved in cellular protein catabolic process	5	60	8.91667	0.00100423	0.0185047
GO:0001966	thigmotaxis	2	3	71.3333	0.0010401	0.0185047
GO:0002762	negative regulation of myeloid leukocyte differentiation	2	3	71.3333	0.0010401	0.0185047
GO:0021986	habenula development	2	3	71.3333	0.0010401	0.0185047
GO:0045833	negative regulation of lipid metabolic process	2	3	71.3333	0.0010401	0.0185047
GO:0043161	proteasome-mediated ubiquitin-dependent protein catabolic process	8	175	4.89143	0.00105816	0.0185047
GO:0000082	G1/S transition of mitotic cell cycle	5	61	8.77049	0.00108554	0.0185047
GO:0008217	regulation of blood pressure	5	61	8.77049	0.00108554	0.0185047
GO:0010033	response to organic substance	5	61	8.77049	0.00108554	0.0185047
GO:0071347	cellular response to interleukin-1	5	61	8.77049	0.00108554	0.0185047
GO:0000463	maturation of LSU-rRNA from tricistronic rRNA transcript (SSU-rRNA, 5.8S rRNA, LSU-rRNA)	3	14	22.9286	0.00109582	0.0185047
GO:0006163	purine nucleotide metabolic process	3	14	22.9286	0.00109582	0.0185047
GO:0006851	mitochondrial calcium ion transmembrane transport	3	14	22.9286	0.00109582	0.0185047
GO:0031915	positive regulation of synaptic plasticity	3	14	22.9286	0.00109582	0.0185047
GO:0042953	lipoprotein transport	3	14	22.9286	0.00109582	0.0185047
GO:0051225	spindle assembly	4	34	12.5882	0.00112268	0.0187089
GO:0071310	cellular response to organic substance	4	34	12.5882	0.00112268	0.0187089
GO:0008152	metabolic process	8	177	4.83616	0.00114237	0.0189126
GO:0070374	positive regulation of ERK1 and ERK2 cascade	9	224	4.29911	0.0011614	0.0191028
GO:0002548	monocyte chemotaxis	4	35	12.2286	0.00125821	0.0202996
GO:0031640	killing of cells of other organism	4	35	12.2286	0.00125821	0.0202996
GO:0032689	negative regulation of interferon-gamma production	4	35	12.2286	0.00125821	0.0202996
GO:0032717	negative regulation of interleukin-8 production	3	15	21.4	0.00136026	0.0218072
GO:0006898	receptor-mediated endocytosis	5	65	8.23077	0.00146169	0.0231404
GO:0050766	positive regulation of phagocytosis	5	65	8.23077	0.00146169	0.0231404
GO:0051607	defense response to virus	8	184	4.65217	0.00148129	0.023305
GO:0048662	negative regulation of smooth muscle cell proliferation	4	37	11.5676	0.00156378	0.0243009
GO:0050807	regulation of synapse organization	4	37	11.5676	0.00156378	0.0243009
GO:0007155	cell adhesion	15	574	2.79617	0.00161636	0.024772
GO:0006816	calcium ion transport	7	142	5.27465	0.00161806	0.024772
GO:0032755	positive regulation of interleukin-6 production	6	102	6.29412	0.00164321	0.024772
GO:0032760	positive regulation of tumor necrosis factor production	6	102	6.29412	0.00164321	0.024772
GO:0008285	negative regulation of cell proliferation	12	396	3.24242	0.00165786	0.024772
GO:0015986	ATP synthesis coupled proton transport	3	16	20.0625	0.00166255	0.024772
GO:0032611	interleukin-1 beta production	3	16	20.0625	0.00166255	0.024772
GO:0070059	intrinsic apoptotic signaling pathway in response to endoplasmic reticulum stress	4	38	11.2632	0.00173489	0.0256987
GO:0006470	protein dephosphorylation	7	144	5.20139	0.00175995	0.0259183
GO:0007613	memory	6	105	6.11429	0.00191823	0.0277061
GO:0009790	embryo development	5	69	7.75362	0.00192882	0.0277061
GO:0043154	negative regulation of cysteine-type endopeptidase activity involved in apoptotic process	5	69	7.75362	0.00192882	0.0277061
GO:0050808	synapse organization	5	69	7.75362	0.00192882	0.0277061
GO:0030595	leukocyte chemotaxis	3	17	18.8824	0.00200481	0.0277061
GO:0045475	locomotor rhythm	3	17	18.8824	0.00200481	0.0277061
GO:0090336	positive regulation of brown fat cell differentiation	3	17	18.8824	0.00200481	0.0277061
GO:1904263	positive regulation of TORC1 signaling	3	17	18.8824	0.00200481	0.0277061
GO:0019722	calcium-mediated signaling	5	70	7.64286	0.00206136	0.0277061
GO:0032922	circadian regulation of gene expression	5	70	7.64286	0.00206136	0.0277061
GO:0006450	regulation of translational fidelity	2	4	53.5	0.0020673	0.0277061
GO:0010916	negative regulation of very-low-density lipoprotein particle clearance	2	4	53.5	0.0020673	0.0277061
GO:0032227	negative regulation of synaptic transmission, dopaminergic	2	4	53.5	0.0020673	0.0277061
GO:0033007	negative regulation of mast cell activation involved in immune response	2	4	53.5	0.0020673	0.0277061
GO:1901842	negative regulation of high voltage-gated calcium channel activity	2	4	53.5	0.0020673	0.0277061
GO:2000138	positive regulation of cell proliferation involved in heart morphogenesis	2	4	53.5	0.0020673	0.0277061
GO:2000503	positive regulation of natural killer cell chemotaxis	2	4	53.5	0.0020673	0.0277061
GO:0007098	centrosome cycle	4	40	10.7	0.00211649	0.0282161
GO:0006469	negative regulation of protein kinase activity	5	71	7.53521	0.00220062	0.0291842
GO:0042981	regulation of apoptotic process	8	196	4.36735	0.00224987	0.0296819
GO:0001938	positive regulation of endothelial cell proliferation	5	72	7.43056	0.00234684	0.0304098
GO:0000188	inactivation of MAPK activity	3	18	17.8333	0.00238909	0.0304098
GO:0008210	estrogen metabolic process	3	18	17.8333	0.00238909	0.0304098
GO:0030150	protein import into mitochondrial matrix	3	18	17.8333	0.00238909	0.0304098
GO:0045019	negative regulation of nitric oxide biosynthetic process	3	18	17.8333	0.00238909	0.0304098
GO:0045824	negative regulation of innate immune response	3	18	17.8333	0.00238909	0.0304098
GO:1900016	negative regulation of cytokine production involved in inflammatory response	3	18	17.8333	0.00238909	0.0304098
GO:0060271	cilium assembly	8	198	4.32323	0.00240467	0.0304552
GO:0050830	defense response to Gram-positive bacterium	7	152	4.92763	0.0024299	0.0306216
GO:0007224	smoothened signaling pathway	5	74	7.22973	0.00266097	0.0333675
GO:0010629	negative regulation of gene expression	11	361	3.26039	0.00271883	0.0339251
GO:0030282	bone mineralization	4	43	9.95349	0.00279549	0.0344553
GO:0034198	cellular response to amino acid starvation	4	43	9.95349	0.00279549	0.0344553
GO:2000249	regulation of actin cytoskeleton reorganization	3	19	16.8947	0.00281738	0.0344553
GO:0009267	cellular response to starvation	5	75	7.13333	0.00282933	0.0344553
GO:0032436	positive regulation of proteasomal ubiquitin-dependent protein catabolic process	5	75	7.13333	0.00282933	0.0344553
GO:0030593	neutrophil chemotaxis	5	76	7.03947	0.00300553	0.0362524
GO:0043525	positive regulation of neuron apoptotic process	5	76	7.03947	0.00300553	0.0362524
GO:0006635	fatty acid beta-oxidation	4	44	9.72727	0.00305246	0.0364712
GO:0010718	positive regulation of epithelial to mesenchymal transition	4	44	9.72727	0.00305246	0.0364712
GO:0006801	superoxide metabolic process	3	20	16.05	0.0032916	0.0375467
GO:0009416	response to light stimulus	3	20	16.05	0.0032916	0.0375467
GO:0016226	iron-sulfur cluster assembly	3	20	16.05	0.0032916	0.0375467
GO:0030889	negative regulation of B cell proliferation	3	20	16.05	0.0032916	0.0375467
GO:0035970	peptidyl-threonine dephosphorylation	3	20	16.05	0.0032916	0.0375467
GO:0045987	positive regulation of smooth muscle contraction	3	20	16.05	0.0032916	0.0375467
GO:0007346	regulation of mitotic cell cycle	4	45	9.51111	0.00332567	0.0375467
GO:0008333	endosome to lysosome transport	4	45	9.51111	0.00332567	0.0375467
GO:0032722	positive regulation of chemokine production	4	45	9.51111	0.00332567	0.0375467
GO:0048469	cell maturation	4	45	9.51111	0.00332567	0.0375467
GO:0000278	mitotic cell cycle	6	117	5.48718	0.00339351	0.0375467
GO:0051897	positive regulation of protein kinase B signaling	6	117	5.48718	0.00339351	0.0375467
GO:0006552	leucine catabolic process	2	5	42.8	0.00342412	0.0375467
GO:0007000	nucleolus organization	2	5	42.8	0.00342412	0.0375467
GO:0060266	negative regulation of respiratory burst involved in inflammatory response	2	5	42.8	0.00342412	0.0375467
GO:0060298	positive regulation of sarcomere organization	2	5	42.8	0.00342412	0.0375467
GO:0070094	positive regulation of glucagon secretion	2	5	42.8	0.00342412	0.0375467
GO:1902255	positive regulation of intrinsic apoptotic signaling pathway by p53 class mediator	2	5	42.8	0.00342412	0.0375467
GO:2000435	negative regulation of protein neddylation	2	5	42.8	0.00342412	0.0375467
GO:0060021	roof of mouth development	5	79	6.77215	0.00358342	0.0389562
GO:0060041	retina development in camera-type eye	5	79	6.77215	0.00358342	0.0389562
GO:0043124	negative regulation of I-kappaB kinase/NF-kappaB signaling	4	46	9.30435	0.00361567	0.0389723
GO:0051898	negative regulation of protein kinase B signaling	4	46	9.30435	0.00361567	0.0389723
GO:0045104	intermediate filament cytoskeleton organization	3	21	15.2857	0.00381361	0.040759
GO:0050709	negative regulation of protein secretion	3	21	15.2857	0.00381361	0.040759
GO:0006260	DNA replication	6	120	5.35	0.00387141	0.0410305
GO:0061844	antimicrobial humoral immune response mediated by antimicrobial peptide	6	120	5.35	0.00387141	0.0410305
GO:0007050	cell cycle arrest	5	82	6.52439	0.00424013	0.0445654
GO:0040008	regulation of growth	5	82	6.52439	0.00424013	0.0445654
GO:0006468	protein phosphorylation	14	568	2.63732	0.00434554	0.0454845
GO:0002028	regulation of sodium ion transport	3	22	14.5909	0.0043852	0.0455235
GO:0010499	proteasomal ubiquitin-independent protein catabolic process	3	22	14.5909	0.0043852	0.0455235
GO:0045087	innate immune response	14	574	2.60976	0.00479515	0.049576
GO:0071560	cellular response to transforming growth factor beta stimulus	4	50	8.56	0.0049547	0.0509028
GO:0009952	anterior/posterior pattern specification	6	126	5.09524	0.00498092	0.0509028
GO:0017183	peptidyl-diphthamide biosynthetic process from peptidyl-histidine	2	6	35.6667	0.00510435	0.0509028
GO:0031630	regulation of synaptic vesicle fusion to presynaptic active zone membrane	2	6	35.6667	0.00510435	0.0509028
GO:0032602	chemokine production	2	6	35.6667	0.00510435	0.0509028
GO:0034080	CENP-A containing nucleosome assembly	2	6	35.6667	0.00510435	0.0509028
GO:0050917	sensory perception of umami taste	2	6	35.6667	0.00510435	0.0509028
GO:0051771	negative regulation of nitric-oxide synthase biosynthetic process	2	6	35.6667	0.00510435	0.0509028
GO:2000556	positive regulation of T-helper 1 cell cytokine production	2	6	35.6667	0.00510435	0.0509028
GO:0016055	Wnt signaling pathway	8	225	3.80444	0.0054724	0.0543592
GO:0032092	positive regulation of protein binding	5	87	6.14943	0.00552726	0.0546897
GO:0016079	synaptic vesicle exocytosis	3	24	13.375	0.00568397	0.0558043
GO:0050870	positive regulation of T cell activation	3	24	13.375	0.00568397	0.0558043
GO:0030198	extracellular matrix organization	7	176	4.25568	0.00571136	0.0558567
GO:0030216	keratinocyte differentiation	4	52	8.23077	0.0057394	0.055915
GO:0006935	chemotaxis	6	131	4.90076	0.0060785	0.0589039
GO:0051028	mRNA transport	5	89	6.01124	0.00611519	0.0589039
GO:0031397	negative regulation of protein ubiquitination	4	53	8.07547	0.00616247	0.0589039
GO:0032757	positive regulation of interleukin-8 production	4	53	8.07547	0.00616247	0.0589039
GO:0045600	positive regulation of fat cell differentiation	4	53	8.07547	0.00616247	0.0589039
GO:0007411	axon guidance	7	179	4.18436	0.00629024	0.0598991
GO:0000462	maturation of SSU-rRNA from tricistronic rRNA transcript (SSU-rRNA, 5.8S rRNA, LSU-rRNA)	3	25	12.84	0.00641442	0.0604005
GO:0010613	positive regulation of cardiac muscle hypertrophy	3	25	12.84	0.00641442	0.0604005
GO:0032691	negative regulation of interleukin-1 beta production	3	25	12.84	0.00641442	0.0604005
GO:0007566	embryo implantation	4	54	7.92593	0.00660675	0.0619811
GO:0001505	regulation of neurotransmitter levels	2	7	30.5714	0.00710183	0.0642258
GO:0031622	positive regulation of fever generation	2	7	30.5714	0.00710183	0.0642258
GO:0045590	negative regulation of regulatory T cell differentiation	2	7	30.5714	0.00710183	0.0642258
GO:0072655	establishment of protein localization to mitochondrion	2	7	30.5714	0.00710183	0.0642258
GO:1901142	insulin metabolic process	2	7	30.5714	0.00710183	0.0642258
GO:1902570	protein localization to nucleolus	2	7	30.5714	0.00710183	0.0642258
GO:1903753	negative regulation of p38MAPK cascade	2	7	30.5714	0.00710183	0.0642258
GO:1904798	positive regulation of core promoter binding	2	7	30.5714	0.00710183	0.0642258
GO:2000553	positive regulation of T-helper 2 cell cytokine production	2	7	30.5714	0.00710183	0.0642258
GO:0010575	positive regulation of vascular endothelial growth factor production	3	26	12.3462	0.007201	0.0642258
GO:0042104	positive regulation of activated T cell proliferation	3	26	12.3462	0.007201	0.0642258
GO:0045736	negative regulation of cyclin-dependent protein serine/threonine kinase activity	3	26	12.3462	0.007201	0.0642258
GO:0072332	intrinsic apoptotic signaling pathway by p53 class mediator	3	26	12.3462	0.007201	0.0642258
GO:0090200	positive regulation of release of cytochrome c from mitochondria	3	26	12.3462	0.007201	0.0642258
GO:0007420	brain development	7	186	4.02688	0.00781862	0.0694897
GO:0071158	positive regulation of cell cycle arrest	3	27	11.8889	0.0080452	0.0712534
GO:0006351	transcription, DNA-templated	5	96	5.57292	0.00853819	0.0753562
GO:0008104	protein localization	5	97	5.51546	0.00893406	0.0785763
GO:0010942	positive regulation of cell death	4	59	7.25424	0.00916541	0.0789298
GO:0000447	endonucleolytic cleavage in ITS1 to separate SSU-rRNA from 5.8S rRNA and LSU-rRNA from tricistronic rRNA transcript (SSU-rRNA, 5.8S rRNA, LSU-rRNA)	2	8	26.75	0.0094105	0.0789298
GO:0006228	UTP biosynthetic process	2	8	26.75	0.0094105	0.0789298
GO:0006308	DNA catabolic process	2	8	26.75	0.0094105	0.0789298
GO:0007213	G protein-coupled acetylcholine receptor signaling pathway	2	8	26.75	0.0094105	0.0789298
GO:0010224	response to UV-B	2	8	26.75	0.0094105	0.0789298
GO:0010803	regulation of tumor necrosis factor-mediated signaling pathway	2	8	26.75	0.0094105	0.0789298
GO:0010827	regulation of glucose transmembrane transport	2	8	26.75	0.0094105	0.0789298
GO:0032713	negative regulation of interleukin-4 production	2	8	26.75	0.0094105	0.0789298
GO:0034144	negative regulation of toll-like receptor 4 signaling pathway	2	8	26.75	0.0094105	0.0789298
GO:0045039	protein import into mitochondrial inner membrane	2	8	26.75	0.0094105	0.0789298
GO:0051775	response to redox state	2	8	26.75	0.0094105	0.0789298
GO:0061732	mitochondrial acetyl-CoA biosynthetic process from pyruvate	2	8	26.75	0.0094105	0.0789298
GO:0070431	nucleotide-binding oligomerization domain containing 2 signaling pathway	2	8	26.75	0.0094105	0.0789298
GO:0006367	transcription initiation from RNA polymerase II promoter	3	29	11.069	0.00991211	0.0823192
GO:0009409	response to cold	3	29	11.069	0.00991211	0.0823192
GO:0045672	positive regulation of osteoclast differentiation	3	29	11.069	0.00991211	0.0823192
GO:0008089	anterograde axonal transport	3	30	10.7	0.0109375	0.0900869
GO:0051881	regulation of mitochondrial membrane potential	3	30	10.7	0.0109375	0.0900869
GO:0032720	negative regulation of tumor necrosis factor production	4	62	6.90323	0.0109897	0.0900869
GO:0050885	neuromuscular process controlling balance	4	62	6.90323	0.0109897	0.0900869
GO:0055085	transmembrane transport	11	432	2.72454	0.0111816	0.0913645
GO:0021766	hippocampus development	4	63	6.79365	0.0116491	0.0943088
GO:0002367	cytokine production involved in immune response	2	9	23.7778	0.0120244	0.0943088
GO:0002821	positive regulation of adaptive immune response	2	9	23.7778	0.0120244	0.0943088
GO:0002862	negative regulation of inflammatory response to antigenic stimulus	2	9	23.7778	0.0120244	0.0943088
GO:0006241	CTP biosynthetic process	2	9	23.7778	0.0120244	0.0943088
GO:0031394	positive regulation of prostaglandin biosynthetic process	2	9	23.7778	0.0120244	0.0943088
GO:0044849	estrous cycle	2	9	23.7778	0.0120244	0.0943088
GO:0045927	positive regulation of growth	2	9	23.7778	0.0120244	0.0943088
GO:0050691	regulation of defense response to virus by host	2	9	23.7778	0.0120244	0.0943088
GO:0071636	positive regulation of transforming growth factor beta production	2	9	23.7778	0.0120244	0.0943088
GO:0072321	chaperone-mediated protein transport	2	9	23.7778	0.0120244	0.0943088
GO:1900407	regulation of cellular response to oxidative stress	2	9	23.7778	0.0120244	0.0943088
GO:2000379	positive regulation of reactive oxygen species metabolic process	3	31	10.3548	0.012026	0.0943088
GO:0010506	regulation of autophagy	4	64	6.6875	0.0123351	0.0961377
GO:0045785	positive regulation of cell adhesion	4	64	6.6875	0.0123351	0.0961377
GO:0051260	protein homooligomerization	5	105	5.09524	0.0125973	0.0978801
GO:0006694	steroid biosynthetic process	4	65	6.58462	0.0130481	0.100245
GO:0000132	establishment of mitotic spindle orientation	3	32	10.0312	0.0131786	0.100245
GO:0032743	positive regulation of interleukin-2 production	3	32	10.0312	0.0131786	0.100245
GO:0045840	positive regulation of mitotic nuclear division	3	32	10.0312	0.0131786	0.100245
GO:0051928	positive regulation of calcium ion transport	3	32	10.0312	0.0131786	0.100245
GO:2000352	negative regulation of endothelial cell apoptotic process	3	32	10.0312	0.0131786	0.100245
GO:2001238	positive regulation of extrinsic apoptotic signaling pathway	3	32	10.0312	0.0131786	0.100245
GO:0000184	nuclear-transcribed mRNA catabolic process, nonsense-mediated decay	3	33	9.72727	0.0143967	0.108532
GO:0001958	endochondral ossification	3	33	9.72727	0.0143967	0.108532
GO:0032435	negative regulation of proteasomal ubiquitin-dependent protein catabolic process	3	33	9.72727	0.0143967	0.108532
GO:0006183	GTP biosynthetic process	2	10	21.4	0.0149376	0.108727
GO:0009142	nucleoside triphosphate biosynthetic process	2	10	21.4	0.0149376	0.108727
GO:0010828	positive regulation of glucose transmembrane transport	2	10	21.4	0.0149376	0.108727
GO:0033539	fatty acid beta-oxidation using acyl-CoA dehydrogenase	2	10	21.4	0.0149376	0.108727
GO:0033598	mammary gland epithelial cell proliferation	2	10	21.4	0.0149376	0.108727
GO:0043486	histone exchange	2	10	21.4	0.0149376	0.108727
GO:0050665	hydrogen peroxide biosynthetic process	2	10	21.4	0.0149376	0.108727
GO:0060670	branching involved in labyrinthine layer morphogenesis	2	10	21.4	0.0149376	0.108727
GO:0071233	cellular response to leucine	2	10	21.4	0.0149376	0.108727
GO:1900747	negative regulation of vascular endothelial growth factor signaling pathway	2	10	21.4	0.0149376	0.108727
GO:1904667	negative regulation of ubiquitin protein ligase activity	2	10	21.4	0.0149376	0.108727
GO:1990264	peptidyl-tyrosine dephosphorylation involved in inactivation of protein kinase activity	2	10	21.4	0.0149376	0.108727
GO:0007605	sensory perception of sound	8	267	3.20599	0.0156694	0.112523
GO:0006402	mRNA catabolic process	3	34	9.44118	0.0156813	0.112523
GO:0032008	positive regulation of TOR signaling	3	34	9.44118	0.0156813	0.112523
GO:0043388	positive regulation of DNA binding	3	34	9.44118	0.0156813	0.112523
GO:0045739	positive regulation of DNA repair	3	34	9.44118	0.0156813	0.112523
GO:0007156	homophilic cell adhesion via plasma membrane adhesion molecules	5	111	4.81982	0.0159771	0.114322
GO:0007017	microtubule-based process	3	35	9.17143	0.0170334	0.121196
GO:0033209	tumor necrosis factor-mediated signaling pathway	3	35	9.17143	0.0170334	0.121196
GO:0007158	neuron cell-cell adhesion	2	11	19.4545	0.0181444	0.125917
GO:0009083	branched-chain amino acid catabolic process	2	11	19.4545	0.0181444	0.125917
GO:0010035	response to inorganic substance	2	11	19.4545	0.0181444	0.125917
GO:0010470	regulation of gastrulation	2	11	19.4545	0.0181444	0.125917
GO:0032000	positive regulation of fatty acid beta-oxidation	2	11	19.4545	0.0181444	0.125917
GO:0036444	calcium import into the mitochondrion	2	11	19.4545	0.0181444	0.125917
GO:0045292	mRNA cis splicing, via spliceosome	2	11	19.4545	0.0181444	0.125917
GO:0051123	RNA polymerase II preinitiation complex assembly	2	11	19.4545	0.0181444	0.125917
GO:0051901	positive regulation of mitochondrial depolarization	2	11	19.4545	0.0181444	0.125917
GO:0010468	regulation of gene expression	11	462	2.54762	0.0184396	0.127369
GO:0009058	biosynthetic process	3	36	8.91667	0.0184542	0.127369
GO:0051091	positive regulation of DNA-binding transcription factor activity	5	116	4.61207	0.0192519	0.132514
GO:0060612	adipose tissue development	3	37	8.67568	0.0199445	0.136539
GO:0060999	positive regulation of dendritic spine development	3	37	8.67568	0.0199445	0.136539
GO:0031175	neuron projection development	6	167	3.84431	0.0202266	0.138097
GO:0001932	regulation of protein phosphorylation	4	74	5.78378	0.0207639	0.140628
GO:0034599	cellular response to oxidative stress	4	74	5.78378	0.0207639	0.140628
GO:0045732	positive regulation of protein catabolic process	4	74	5.78378	0.0207639	0.140628
GO:0050896	response to stimulus	7	223	3.35874	0.0211812	0.140903
GO:0007369	gastrulation	3	38	8.44737	0.0215054	0.140903
GO:0032733	positive regulation of interleukin-10 production	3	38	8.44737	0.0215054	0.140903
GO:0072593	reactive oxygen species metabolic process	3	38	8.44737	0.0215054	0.140903
GO:0001913	T cell mediated cytotoxicity	2	12	17.8333	0.0216389	0.140903
GO:0006110	regulation of glycolytic process	2	12	17.8333	0.0216389	0.140903
GO:0008090	retrograde axonal transport	2	12	17.8333	0.0216389	0.140903
GO:0021952	central nervous system projection neuron axonogenesis	2	12	17.8333	0.0216389	0.140903
GO:0032308	positive regulation of prostaglandin secretion	2	12	17.8333	0.0216389	0.140903
GO:0032725	positive regulation of granulocyte macrophage colony-stimulating factor production	2	12	17.8333	0.0216389	0.140903
GO:0043248	proteasome assembly	2	12	17.8333	0.0216389	0.140903
GO:0043281	regulation of cysteine-type endopeptidase activity involved in apoptotic process	2	12	17.8333	0.0216389	0.140903
GO:0045348	positive regulation of MHC class II biosynthetic process	2	12	17.8333	0.0216389	0.140903
GO:0070417	cellular response to cold	2	12	17.8333	0.0216389	0.140903
GO:0071639	positive regulation of monocyte chemotactic protein-1 production	2	12	17.8333	0.0216389	0.140903
GO:0010976	positive regulation of neuron projection development	6	171	3.75439	0.0226509	0.147114
GO:0071456	cellular response to hypoxia	4	76	5.63158	0.022817	0.147814
GO:0032259	methylation	6	172	3.73256	0.0232886	0.150485
GO:0019233	sensory perception of pain	4	77	5.55844	0.0238924	0.153603
GO:0071277	cellular response to calcium ion	4	77	5.55844	0.0238924	0.153603
GO:0006814	sodium ion transport	5	123	4.34959	0.0245995	0.157748
GO:0006641	triglyceride metabolic process	3	40	8.025	0.024842	0.158102
GO:0007616	long-term memory	3	40	8.025	0.024842	0.158102
GO:0043507	positive regulation of JUN kinase activity	3	40	8.025	0.024842	0.158102
GO:0050679	positive regulation of epithelial cell proliferation	4	78	5.48718	0.0250011	0.158177
GO:0001682	tRNA 5'-leader removal	2	13	16.4615	0.0254157	0.158177
GO:0032516	positive regulation of phosphoprotein phosphatase activity	2	13	16.4615	0.0254157	0.158177
GO:0032675	regulation of interleukin-6 production	2	13	16.4615	0.0254157	0.158177
GO:0045651	positive regulation of macrophage differentiation	2	13	16.4615	0.0254157	0.158177
GO:0048711	positive regulation of astrocyte differentiation	2	13	16.4615	0.0254157	0.158177
GO:0051310	metaphase plate congression	2	13	16.4615	0.0254157	0.158177
GO:0070262	peptidyl-serine dephosphorylation	2	13	16.4615	0.0254157	0.158177
GO:0071901	negative regulation of protein serine/threonine kinase activity	2	13	16.4615	0.0254157	0.158177
GO:0045727	positive regulation of translation	4	79	5.41772	0.0261434	0.162307
GO:0050729	positive regulation of inflammatory response	4	80	5.35	0.0273197	0.162421
GO:0006605	protein targeting	3	42	7.64286	0.0284706	0.162421
GO:0050767	regulation of neurogenesis	3	42	7.64286	0.0284706	0.162421
GO:0097009	energy homeostasis	3	42	7.64286	0.0284706	0.162421
GO:1900026	positive regulation of substrate adhesion-dependent cell spreading	3	42	7.64286	0.0284706	0.162421
GO:0007175	negative regulation of epidermal growth factor-activated receptor activity	2	14	15.2857	0.029469	0.162421
GO:0043984	histone H4-K16 acetylation	2	14	15.2857	0.029469	0.162421
GO:0045333	cellular respiration	2	14	15.2857	0.029469	0.162421
GO:0045943	positive regulation of transcription by RNA polymerase I	2	14	15.2857	0.029469	0.162421
GO:0046888	negative regulation of hormone secretion	2	14	15.2857	0.029469	0.162421
GO:0048096	chromatin-mediated maintenance of transcription	2	14	15.2857	0.029469	0.162421
GO:0051223	regulation of protein transport	2	14	15.2857	0.029469	0.162421
GO:0061036	positive regulation of cartilage development	2	14	15.2857	0.029469	0.162421
GO:0086002	cardiac muscle cell action potential involved in contraction	2	14	15.2857	0.029469	0.162421
GO:2000347	positive regulation of hepatocyte proliferation	2	14	15.2857	0.029469	0.162421
GO:0050821	protein stabilization	6	181	3.54696	0.0296316	0.162421
GO:0030534	adult behavior	3	43	7.46512	0.0303962	0.162421
GO:0035774	positive regulation of insulin secretion involved in cellular response to glucose stimulus	3	43	7.46512	0.0303962	0.162421
GO:0046627	negative regulation of insulin receptor signaling pathway	3	43	7.46512	0.0303962	0.162421
GO:0007052	mitotic spindle organization	3	44	7.29545	0.0323969	0.162421
GO:0097191	extrinsic apoptotic signaling pathway	3	44	7.29545	0.0323969	0.162421
GO:0007368	determination of left/right symmetry	4	85	5.03529	0.0337264	0.162421
GO:0000470	maturation of LSU-rRNA	2	15	14.2667	0.0337934	0.162421
GO:0003084	positive regulation of systemic arterial blood pressure	2	15	14.2667	0.0337934	0.162421
GO:0006744	ubiquinone biosynthetic process	2	15	14.2667	0.0337934	0.162421
GO:0008209	androgen metabolic process	2	15	14.2667	0.0337934	0.162421
GO:0021680	cerebellar Purkinje cell layer development	2	15	14.2667	0.0337934	0.162421
GO:0030490	maturation of SSU-rRNA	2	15	14.2667	0.0337934	0.162421
GO:0033690	positive regulation of osteoblast proliferation	2	15	14.2667	0.0337934	0.162421
GO:0035721	intraciliary retrograde transport	2	15	14.2667	0.0337934	0.162421
GO:0042026	protein refolding	2	15	14.2667	0.0337934	0.162421
GO:0042554	superoxide anion generation	2	15	14.2667	0.0337934	0.162421
GO:0043981	histone H4-K5 acetylation	2	15	14.2667	0.0337934	0.162421
GO:0043982	histone H4-K8 acetylation	2	15	14.2667	0.0337934	0.162421
GO:0045723	positive regulation of fatty acid biosynthetic process	2	15	14.2667	0.0337934	0.162421
GO:0061051	positive regulation of cell growth involved in cardiac muscle cell development	2	15	14.2667	0.0337934	0.162421
GO:2000178	negative regulation of neural precursor cell proliferation	2	15	14.2667	0.0337934	0.162421
GO:0042130	negative regulation of T cell proliferation	3	45	7.13333	0.0344735	0.162421
GO:0042149	cellular response to glucose starvation	3	45	7.13333	0.0344735	0.162421
GO:0051781	positive regulation of cell division	3	45	7.13333	0.0344735	0.162421
GO:0017148	negative regulation of translation	4	87	4.91954	0.0365414	0.162421
GO:0006836	neurotransmitter transport	3	46	6.97826	0.0366263	0.162421
GO:0032526	response to retinoic acid	3	46	6.97826	0.0366263	0.162421
GO:0045786	negative regulation of cell cycle	3	46	6.97826	0.0366263	0.162421
GO:0000461	endonucleolytic cleavage to generate mature 3'-end of SSU-rRNA from (SSU-rRNA, 5.8S rRNA, LSU-rRNA)	1	1	107	0.0373832	0.162421
GO:0000481	maturation of 5S rRNA	1	1	107	0.0373832	0.162421
GO:0001695	histamine catabolic process	1	1	107	0.0373832	0.162421
GO:0002448	mast cell mediated immunity	1	1	107	0.0373832	0.162421
GO:0002552	serotonin secretion by mast cell	1	1	107	0.0373832	0.162421
GO:0002632	negative regulation of granuloma formation	1	1	107	0.0373832	0.162421
GO:0002760	positive regulation of antimicrobial humoral response	1	1	107	0.0373832	0.162421
GO:0002761	regulation of myeloid leukocyte differentiation	1	1	107	0.0373832	0.162421
GO:0002875	negative regulation of chronic inflammatory response to antigenic stimulus	1	1	107	0.0373832	0.162421
GO:0003063	negative regulation of heart rate by acetylcholine	1	1	107	0.0373832	0.162421
GO:0003322	pancreatic A cell development	1	1	107	0.0373832	0.162421
GO:0006185	dGDP biosynthetic process	1	1	107	0.0373832	0.162421
GO:0006535	cysteine biosynthetic process from serine	1	1	107	0.0373832	0.162421
GO:0006653	1,2-diacyl-sn-glycero-3-phosphocholine metabolic process	1	1	107	0.0373832	0.162421
GO:0007630	jump response	1	1	107	0.0373832	0.162421
GO:0009154	purine ribonucleotide catabolic process	1	1	107	0.0373832	0.162421
GO:0009305	protein biotinylation	1	1	107	0.0373832	0.162421
GO:0009444	pyruvate oxidation	1	1	107	0.0373832	0.162421
GO:0010813	neuropeptide catabolic process	1	1	107	0.0373832	0.162421
GO:0010876	lipid localization	1	1	107	0.0373832	0.162421
GO:0017085	response to insecticide	1	1	107	0.0373832	0.162421
GO:0017143	insecticide metabolic process	1	1	107	0.0373832	0.162421
GO:0018142	protein-DNA covalent cross-linking	1	1	107	0.0373832	0.162421
GO:0018191	peptidyl-serine octanoylation	1	1	107	0.0373832	0.162421
GO:0018276	isopeptide cross-linking via N6-glycyl-L-lysine	1	1	107	0.0373832	0.162421
GO:0019081	viral translation	1	1	107	0.0373832	0.162421
GO:0019341	dibenzo-p-dioxin catabolic process	1	1	107	0.0373832	0.162421
GO:0019402	galactitol metabolic process	1	1	107	0.0373832	0.162421
GO:0019637	organophosphate metabolic process	1	1	107	0.0373832	0.162421
GO:0021539	subthalamus development	1	1	107	0.0373832	0.162421
GO:0021548	pons development	1	1	107	0.0373832	0.162421
GO:0021593	rhombomere morphogenesis	1	1	107	0.0373832	0.162421
GO:0021659	rhombomere 3 structural organization	1	1	107	0.0373832	0.162421
GO:0021660	rhombomere 3 formation	1	1	107	0.0373832	0.162421
GO:0021665	rhombomere 5 structural organization	1	1	107	0.0373832	0.162421
GO:0021666	rhombomere 5 formation	1	1	107	0.0373832	0.162421
GO:0021888	hypothalamus gonadotrophin-releasing hormone neuron development	1	1	107	0.0373832	0.162421
GO:0021905	forebrain-midbrain boundary formation	1	1	107	0.0373832	0.162421
GO:0030421	defecation	1	1	107	0.0373832	0.162421
GO:0030704	vitelline membrane formation	1	1	107	0.0373832	0.162421
GO:0031946	regulation of glucocorticoid biosynthetic process	1	1	107	0.0373832	0.162421
GO:0032074	negative regulation of nuclease activity	1	1	107	0.0373832	0.162421
GO:0033029	regulation of neutrophil apoptotic process	1	1	107	0.0373832	0.162421
GO:0034148	negative regulation of toll-like receptor 5 signaling pathway	1	1	107	0.0373832	0.162421
GO:0034377	plasma lipoprotein particle assembly	1	1	107	0.0373832	0.162421
GO:0035739	CD4-positive, alpha-beta T cell proliferation	1	1	107	0.0373832	0.162421
GO:0035740	CD8-positive, alpha-beta T cell proliferation	1	1	107	0.0373832	0.162421
GO:0035782	mature natural killer cell chemotaxis	1	1	107	0.0373832	0.162421
GO:0036060	slit diaphragm assembly	1	1	107	0.0373832	0.162421
GO:0036496	regulation of translational initiation by eIF2 alpha dephosphorylation	1	1	107	0.0373832	0.162421
GO:0038097	positive regulation of mast cell activation by Fc-epsilon receptor signaling pathway	1	1	107	0.0373832	0.162421
GO:0039535	regulation of RIG-I signaling pathway	1	1	107	0.0373832	0.162421
GO:0042023	DNA endoreduplication	1	1	107	0.0373832	0.162421
GO:0042313	protein kinase C deactivation	1	1	107	0.0373832	0.162421
GO:0043335	protein unfolding	1	1	107	0.0373832	0.162421
GO:0045738	negative regulation of DNA repair	1	1	107	0.0373832	0.162421
GO:0046037	GMP metabolic process	1	1	107	0.0373832	0.162421
GO:0046054	dGMP metabolic process	1	1	107	0.0373832	0.162421
GO:0046081	dUTP catabolic process	1	1	107	0.0373832	0.162421
GO:0046479	glycosphingolipid catabolic process	1	1	107	0.0373832	0.162421
GO:0046711	GDP biosynthetic process	1	1	107	0.0373832	0.162421
GO:0048047	mating behavior, sex discrimination	1	1	107	0.0373832	0.162421
GO:0048074	negative regulation of eye pigmentation	1	1	107	0.0373832	0.162421
GO:0051134	negative regulation of NK T cell activation	1	1	107	0.0373832	0.162421
GO:0051866	general adaptation syndrome	1	1	107	0.0373832	0.162421
GO:0055024	regulation of cardiac muscle tissue development	1	1	107	0.0373832	0.162421
GO:0055082	cellular chemical homeostasis	1	1	107	0.0373832	0.162421
GO:0060027	convergent extension involved in gastrulation	1	1	107	0.0373832	0.162421
GO:0060220	camera-type eye photoreceptor cell fate commitment	1	1	107	0.0373832	0.162421
GO:0060409	positive regulation of acetylcholine metabolic process	1	1	107	0.0373832	0.162421
GO:0060448	dichotomous subdivision of terminal units involved in lung branching	1	1	107	0.0373832	0.162421
GO:0060697	positive regulation of phospholipid catabolic process	1	1	107	0.0373832	0.162421
GO:0060806	negative regulation of cell differentiation involved in embryonic placenta development	1	1	107	0.0373832	0.162421
GO:0060989	lipid tube assembly involved in organelle fusion	1	1	107	0.0373832	0.162421
GO:0061170	negative regulation of hair follicle placode formation	1	1	107	0.0373832	0.162421
GO:0061481	response to TNF agonist	1	1	107	0.0373832	0.162421
GO:0061502	early endosome to recycling endosome transport	1	1	107	0.0373832	0.162421
GO:0061874	positive regulation of hepatic stellate cell contraction	1	1	107	0.0373832	0.162421
GO:0061956	penetration of cumulus oophorus	1	1	107	0.0373832	0.162421
GO:0070429	negative regulation of nucleotide-binding oligomerization domain containing 1 signaling pathway	1	1	107	0.0373832	0.162421
GO:0070781	response to biotin	1	1	107	0.0373832	0.162421
GO:0070862	negative regulation of protein exit from endoplasmic reticulum	1	1	107	0.0373832	0.162421
GO:0071110	histone biotinylation	1	1	107	0.0373832	0.162421
GO:0071471	cellular response to non-ionic osmotic stress	1	1	107	0.0373832	0.162421
GO:0071908	determination of intestine left/right asymmetry	1	1	107	0.0373832	0.162421
GO:0071909	determination of stomach left/right asymmetry	1	1	107	0.0373832	0.162421
GO:0072110	glomerular mesangial cell proliferation	1	1	107	0.0373832	0.162421
GO:0072303	positive regulation of glomerular metanephric mesangial cell proliferation	1	1	107	0.0373832	0.162421
GO:0072355	histone H3-T3 phosphorylation	1	1	107	0.0373832	0.162421
GO:0072666	establishment of protein localization to vacuole	1	1	107	0.0373832	0.162421
GO:0080164	regulation of nitric oxide metabolic process	1	1	107	0.0373832	0.162421
GO:0090230	regulation of centromere complex assembly	1	1	107	0.0373832	0.162421
GO:0090297	positive regulation of mitochondrial DNA replication	1	1	107	0.0373832	0.162421
GO:0090410	malonate catabolic process	1	1	107	0.0373832	0.162421
GO:0097106	postsynaptic density organization	1	1	107	0.0373832	0.162421
GO:0098598	learned vocalization behavior or vocal learning	1	1	107	0.0373832	0.162421
GO:0098759	cellular response to interleukin-8	1	1	107	0.0373832	0.162421
GO:0099625	ventricular cardiac muscle cell membrane repolarization	1	1	107	0.0373832	0.162421
GO:0110008	ncRNA deadenylation	1	1	107	0.0373832	0.162421
GO:0110077	vesicle-mediated intercellular transport	1	1	107	0.0373832	0.162421
GO:0120008	positive regulation of glutamatergic neuron differentiation	1	1	107	0.0373832	0.162421
GO:1900036	positive regulation of cellular response to heat	1	1	107	0.0373832	0.162421
GO:1901163	regulation of trophoblast cell migration	1	1	107	0.0373832	0.162421
GO:1901194	negative regulation of formation of translation preinitiation complex	1	1	107	0.0373832	0.162421
GO:1901227	negative regulation of transcription from RNA polymerase II promoter involved in heart development	1	1	107	0.0373832	0.162421
GO:1901494	regulation of cysteine metabolic process	1	1	107	0.0373832	0.162421
GO:1901586	negative regulation of acid-sensing ion channel activity	1	1	107	0.0373832	0.162421
GO:1902480	protein localization to mitotic spindle	1	1	107	0.0373832	0.162421
GO:1902546	positive regulation of DNA N-glycosylase activity	1	1	107	0.0373832	0.162421
GO:1902567	negative regulation of eosinophil activation	1	1	107	0.0373832	0.162421
GO:1902603	carnitine transmembrane transport	1	1	107	0.0373832	0.162421
GO:1903034	regulation of response to wounding	1	1	107	0.0373832	0.162421
GO:1903242	regulation of cardiac muscle hypertrophy in response to stress	1	1	107	0.0373832	0.162421
GO:1903638	positive regulation of protein import into mitochondrial outer membrane	1	1	107	0.0373832	0.162421
GO:1903786	regulation of glutathione biosynthetic process	1	1	107	0.0373832	0.162421
GO:1903825	organic acid transmembrane transport	1	1	107	0.0373832	0.162421
GO:1903917	positive regulation of endoplasmic reticulum stress-induced eIF2 alpha dephosphorylation	1	1	107	0.0373832	0.162421
GO:1904034	positive regulation of t-SNARE clustering	1	1	107	0.0373832	0.162421
GO:1904905	negative regulation of endothelial cell-matrix adhesion via fibronectin	1	1	107	0.0373832	0.162421
GO:1904937	sensory neuron migration	1	1	107	0.0373832	0.162421
GO:1904998	negative regulation of leukocyte adhesion to arterial endothelial cell	1	1	107	0.0373832	0.162421
GO:1905042	negative regulation of epithelium regeneration	1	1	107	0.0373832	0.162421
GO:1905062	positive regulation of cardioblast proliferation	1	1	107	0.0373832	0.162421
GO:1905513	negative regulation of short-term synaptic potentiation	1	1	107	0.0373832	0.162421
GO:1990261	pre-mRNA catabolic process	1	1	107	0.0373832	0.162421
GO:1990442	intrinsic apoptotic signaling pathway in response to nitrosative stress	1	1	107	0.0373832	0.162421
GO:2000108	positive regulation of leukocyte apoptotic process	1	1	107	0.0373832	0.162421
GO:2000417	negative regulation of eosinophil migration	1	1	107	0.0373832	0.162421
GO:2000513	positive regulation of granzyme A production	1	1	107	0.0373832	0.162421
GO:2000518	negative regulation of T-helper 1 cell activation	1	1	107	0.0373832	0.162421
GO:2001198	regulation of dendritic cell differentiation	1	1	107	0.0373832	0.162421
GO:1990830	cellular response to leukemia inhibitory factor	8	311	2.75241	0.0379423	0.164232
GO:0001706	endoderm formation	2	16	13.375	0.0383835	0.164232
GO:0006120	mitochondrial electron transport, NADH to ubiquinone	2	16	13.375	0.0383835	0.164232
GO:0007512	adult heart development	2	16	13.375	0.0383835	0.164232
GO:0014067	negative regulation of phosphatidylinositol 3-kinase signaling	2	16	13.375	0.0383835	0.164232
GO:0032270	positive regulation of cellular protein metabolic process	2	16	13.375	0.0383835	0.164232
GO:0033554	cellular response to stress	2	16	13.375	0.0383835	0.164232
GO:0048715	negative regulation of oligodendrocyte differentiation	2	16	13.375	0.0383835	0.164232
GO:0051560	mitochondrial calcium ion homeostasis	2	16	13.375	0.0383835	0.164232
GO:0007265	Ras protein signal transduction	3	47	6.82979	0.0388561	0.165694
GO:0070098	chemokine-mediated signaling pathway	3	47	6.82979	0.0388561	0.165694
GO:0045429	positive regulation of nitric oxide biosynthetic process	3	48	6.6875	0.0411633	0.175238
GO:0032869	cellular response to insulin stimulus	4	91	4.7033	0.0426206	0.181138
GO:0033120	positive regulation of RNA splicing	2	17	12.5882	0.043234	0.182216
GO:0035994	response to muscle stretch	2	17	12.5882	0.043234	0.182216
GO:0048490	anterograde synaptic vesicle transport	2	17	12.5882	0.043234	0.182216
GO:0048745	smooth muscle tissue development	2	17	12.5882	0.043234	0.182216
GO:0061564	axon development	2	17	12.5882	0.043234	0.182216
GO:0007507	heart development	7	256	2.92578	0.0434748	0.182629
GO:0006413	translational initiation	3	49	6.55102	0.0435484	0.182629
GO:0009749	response to glucose	3	49	6.55102	0.0435484	0.182629
GO:0030030	cell projection organization	6	197	3.25888	0.0438422	0.183557
GO:0007188	adenylate cyclase-modulating G protein-coupled receptor signaling pathway	3	50	6.42	0.0460118	0.191691
GO:0009953	dorsal/ventral pattern formation	3	50	6.42	0.0460118	0.191691
GO:0032715	negative regulation of interleukin-6 production	3	50	6.42	0.0460118	0.191691
GO:0006400	tRNA modification	2	18	11.8889	0.0483396	0.199096
GO:0008631	intrinsic apoptotic signaling pathway in response to oxidative stress	2	18	11.8889	0.0483396	0.199096
GO:0021542	dentate gyrus development	2	18	11.8889	0.0483396	0.199096
GO:0045088	regulation of innate immune response	2	18	11.8889	0.0483396	0.199096
GO:0050872	white fat cell differentiation	2	18	11.8889	0.0483396	0.199096
GO:0050995	negative regulation of lipid catabolic process	2	18	11.8889	0.0483396	0.199096
GO:1903204	negative regulation of oxidative stress-induced neuron death	2	18	11.8889	0.0483396	0.199096
GO:1901216	positive regulation of neuron death	3	51	6.29412	0.048554	0.199655
GO:0010467	gene expression	4	95	4.50526	0.0493171	0.202464
GO:0007264	small GTPase mediated signal transduction	4	97	4.41237	0.0529032	0.216273
GO:0120162	positive regulation of cold-induced thermogenesis	4	97	4.41237	0.0529032	0.216273
GO:0000956	nuclear-transcribed mRNA catabolic process	2	19	11.2632	0.0536952	0.216273
GO:0001516	prostaglandin biosynthetic process	2	19	11.2632	0.0536952	0.216273
GO:0032700	negative regulation of interleukin-17 production	2	19	11.2632	0.0536952	0.216273
GO:0034063	stress granule assembly	2	19	11.2632	0.0536952	0.216273
GO:0048193	Golgi vesicle transport	2	19	11.2632	0.0536952	0.216273
GO:0048596	embryonic camera-type eye morphogenesis	2	19	11.2632	0.0536952	0.216273
GO:0060707	trophoblast giant cell differentiation	2	19	11.2632	0.0536952	0.216273
GO:0070498	interleukin-1-mediated signaling pathway	2	19	11.2632	0.0536952	0.216273
GO:2000406	positive regulation of T cell migration	2	19	11.2632	0.0536952	0.216273
GO:0032731	positive regulation of interleukin-1 beta production	3	53	6.0566	0.0538761	0.216273
GO:0032868	response to insulin	3	53	6.0566	0.0538761	0.216273
GO:0042307	positive regulation of protein import into nucleus	3	53	6.0566	0.0538761	0.216273
GO:0006338	chromatin remodeling	4	98	4.36735	0.0547568	0.219114
GO:0016525	negative regulation of angiogenesis	4	98	4.36735	0.0547568	0.219114
GO:0030178	negative regulation of Wnt signaling pathway	3	54	5.94444	0.0566566	0.226002
GO:0048286	lung alveolus development	3	54	5.94444	0.0566566	0.226002
GO:0001975	response to amphetamine	2	20	10.7	0.0592955	0.232142
GO:0006783	heme biosynthetic process	2	20	10.7	0.0592955	0.232142
GO:0031589	cell-substrate adhesion	2	20	10.7	0.0592955	0.232142
GO:0031668	cellular response to extracellular stimulus	2	20	10.7	0.0592955	0.232142
GO:0032695	negative regulation of interleukin-12 production	2	20	10.7	0.0592955	0.232142
GO:0042462	eye photoreceptor cell development	2	20	10.7	0.0592955	0.232142
GO:0048513	animal organ development	2	20	10.7	0.0592955	0.232142
GO:0048557	embryonic digestive tract morphogenesis	2	20	10.7	0.0592955	0.232142
GO:0061136	regulation of proteasomal protein catabolic process	2	20	10.7	0.0592955	0.232142
GO:0071157	negative regulation of cell cycle arrest	2	20	10.7	0.0592955	0.232142
GO:2000059	negative regulation of ubiquitin-dependent protein catabolic process	2	20	10.7	0.0592955	0.232142
GO:2001224	positive regulation of neuron migration	2	20	10.7	0.0592955	0.232142
GO:0008584	male gonad development	4	101	4.23762	0.0605633	0.236374
GO:0033138	positive regulation of peptidyl-serine phosphorylation	4	101	4.23762	0.0605633	0.236374
GO:0045599	negative regulation of fat cell differentiation	3	56	5.73214	0.0624581	0.238607
GO:0000380	alternative mRNA splicing, via spliceosome	2	21	10.1905	0.0651358	0.238607
GO:0006261	DNA-dependent DNA replication	2	21	10.1905	0.0651358	0.238607
GO:0021591	ventricular system development	2	21	10.1905	0.0651358	0.238607
GO:0042176	regulation of protein catabolic process	2	21	10.1905	0.0651358	0.238607
GO:0045859	regulation of protein kinase activity	2	21	10.1905	0.0651358	0.238607
GO:0046677	response to antibiotic	2	21	10.1905	0.0651358	0.238607
GO:0046697	decidualization	2	21	10.1905	0.0651358	0.238607
GO:0060252	positive regulation of glial cell proliferation	2	21	10.1905	0.0651358	0.238607
GO:0090050	positive regulation of cell migration involved in sprouting angiogenesis	2	21	10.1905	0.0651358	0.238607
GO:0035556	intracellular signal transduction	9	416	2.3149	0.0695803	0.238607
GO:0006874	cellular calcium ion homeostasis	4	106	4.03774	0.0710751	0.238607
GO:0007413	axonal fasciculation	2	22	9.72727	0.0712108	0.238607
GO:0007602	phototransduction	2	22	9.72727	0.0712108	0.238607
GO:0034620	cellular response to unfolded protein	2	22	9.72727	0.0712108	0.238607
GO:0044772	mitotic cell cycle phase transition	2	22	9.72727	0.0712108	0.238607
GO:0051591	response to cAMP	2	22	9.72727	0.0712108	0.238607
GO:0061001	regulation of dendritic spine morphogenesis	2	22	9.72727	0.0712108	0.238607
GO:1903672	positive regulation of sprouting angiogenesis	2	22	9.72727	0.0712108	0.238607
GO:0000495	box H/ACA snoRNA 3'-end processing	1	2	53.5	0.0744175	0.238607
GO:0001923	B-1 B cell differentiation	1	2	53.5	0.0744175	0.238607
GO:0002124	territorial aggressive behavior	1	2	53.5	0.0744175	0.238607
GO:0002432	granuloma formation	1	2	53.5	0.0744175	0.238607
GO:0002588	positive regulation of antigen processing and presentation of peptide antigen via MHC class II	1	2	53.5	0.0744175	0.238607
GO:0002926	tRNA wobble base 5-methoxycarbonylmethyl-2-thiouridinylation	1	2	53.5	0.0744175	0.238607
GO:0003002	regionalization	1	2	53.5	0.0744175	0.238607
GO:0003012	muscle system process	1	2	53.5	0.0744175	0.238607
GO:0006226	dUMP biosynthetic process	1	2	53.5	0.0744175	0.238607
GO:0006425	glutaminyl-tRNA aminoacylation	1	2	53.5	0.0744175	0.238607
GO:0006429	leucyl-tRNA aminoacylation	1	2	53.5	0.0744175	0.238607
GO:0006580	ethanolamine metabolic process	1	2	53.5	0.0744175	0.238607
GO:0006711	estrogen catabolic process	1	2	53.5	0.0744175	0.238607
GO:0006753	nucleoside phosphate metabolic process	1	2	53.5	0.0744175	0.238607
GO:0007622	rhythmic behavior	1	2	53.5	0.0744175	0.238607
GO:0008216	spermidine metabolic process	1	2	53.5	0.0744175	0.238607
GO:0009812	flavonoid metabolic process	1	2	53.5	0.0744175	0.238607
GO:0010823	negative regulation of mitochondrion organization	1	2	53.5	0.0744175	0.238607
GO:0010868	negative regulation of triglyceride biosynthetic process	1	2	53.5	0.0744175	0.238607
GO:0010957	negative regulation of vitamin D biosynthetic process	1	2	53.5	0.0744175	0.238607
GO:0010998	regulation of translational initiation by eIF2 alpha phosphorylation	1	2	53.5	0.0744175	0.238607
GO:0014740	negative regulation of muscle hyperplasia	1	2	53.5	0.0744175	0.238607
GO:0015882	L-ascorbic acid transmembrane transport	1	2	53.5	0.0744175	0.238607
GO:0016031	tRNA import into mitochondrion	1	2	53.5	0.0744175	0.238607
GO:0019343	cysteine biosynthetic process via cystathionine	1	2	53.5	0.0744175	0.238607
GO:0021589	cerebellum structural organization	1	2	53.5	0.0744175	0.238607
GO:0021722	superior olivary nucleus maturation	1	2	53.5	0.0744175	0.238607
GO:0030185	nitric oxide transport	1	2	53.5	0.0744175	0.238607
GO:0031509	telomeric heterochromatin assembly	1	2	53.5	0.0744175	0.238607
GO:0031583	phospholipase D-activating G protein-coupled receptor signaling pathway	1	2	53.5	0.0744175	0.238607
GO:0032057	negative regulation of translational initiation in response to stress	1	2	53.5	0.0744175	0.238607
GO:0032370	positive regulation of lipid transport	1	2	53.5	0.0744175	0.238607
GO:0032412	regulation of ion transmembrane transporter activity	1	2	53.5	0.0744175	0.238607
GO:0032447	protein urmylation	1	2	53.5	0.0744175	0.238607
GO:0032612	interleukin-1 production	1	2	53.5	0.0744175	0.238607
GO:0032621	interleukin-18 production	1	2	53.5	0.0744175	0.238607
GO:0032765	positive regulation of mast cell cytokine production	1	2	53.5	0.0744175	0.238607
GO:0032796	uropod organization	1	2	53.5	0.0744175	0.238607
GO:0032986	protein-DNA complex disassembly	1	2	53.5	0.0744175	0.238607
GO:0033233	regulation of protein sumoylation	1	2	53.5	0.0744175	0.238607
GO:0034125	negative regulation of MyD88-dependent toll-like receptor signaling pathway	1	2	53.5	0.0744175	0.238607
GO:0034247	snoRNA splicing	1	2	53.5	0.0744175	0.238607
GO:0035505	positive regulation of myosin light chain kinase activity	1	2	53.5	0.0744175	0.238607
GO:0036265	RNA (guanine-N7)-methylation	1	2	53.5	0.0744175	0.238607
GO:0036316	SREBP-SCAP complex retention in endoplasmic reticulum	1	2	53.5	0.0744175	0.238607
GO:0036321	ghrelin secretion	1	2	53.5	0.0744175	0.238607
GO:0036492	eiF2alpha phosphorylation in response to endoplasmic reticulum stress	1	2	53.5	0.0744175	0.238607
GO:0038018	Wnt receptor catabolic process	1	2	53.5	0.0744175	0.238607
GO:0038195	urokinase plasminogen activator signaling pathway	1	2	53.5	0.0744175	0.238607
GO:0039520	induction by virus of host autophagy	1	2	53.5	0.0744175	0.238607
GO:0040034	regulation of development, heterochronic	1	2	53.5	0.0744175	0.238607
GO:0042494	detection of bacterial lipoprotein	1	2	53.5	0.0744175	0.238607
GO:0042773	ATP synthesis coupled electron transport	1	2	53.5	0.0744175	0.238607
GO:0043000	Golgi to plasma membrane CFTR protein transport	1	2	53.5	0.0744175	0.238607
GO:0043179	rhythmic excitation	1	2	53.5	0.0744175	0.238607
GO:0043402	glucocorticoid mediated signaling pathway	1	2	53.5	0.0744175	0.238607
GO:0043558	regulation of translational initiation in response to stress	1	2	53.5	0.0744175	0.238607
GO:0044546	NLRP3 inflammasome complex assembly	1	2	53.5	0.0744175	0.238607
GO:0045645	positive regulation of eosinophil differentiation	1	2	53.5	0.0744175	0.238607
GO:0045659	negative regulation of neutrophil differentiation	1	2	53.5	0.0744175	0.238607
GO:0045728	respiratory burst after phagocytosis	1	2	53.5	0.0744175	0.238607
GO:0046203	spermidine catabolic process	1	2	53.5	0.0744175	0.238607
GO:0046226	coumarin catabolic process	1	2	53.5	0.0744175	0.238607
GO:0046477	glycosylceramide catabolic process	1	2	53.5	0.0744175	0.238607
GO:0048627	myoblast development	1	2	53.5	0.0744175	0.238607
GO:0051126	negative regulation of actin nucleation	1	2	53.5	0.0744175	0.238607
GO:0051625	epinephrine uptake	1	2	53.5	0.0744175	0.238607
GO:0060101	negative regulation of phagocytosis, engulfment	1	2	53.5	0.0744175	0.238607
GO:0060265	positive regulation of respiratory burst involved in inflammatory response	1	2	53.5	0.0744175	0.238607
GO:0060302	negative regulation of cytokine activity	1	2	53.5	0.0744175	0.238607
GO:0060734	regulation of endoplasmic reticulum stress-induced eIF2 alpha phosphorylation	1	2	53.5	0.0744175	0.238607
GO:0061760	antifungal innate immune response	1	2	53.5	0.0744175	0.238607
GO:0061790	dense core granule docking	1	2	53.5	0.0744175	0.238607
GO:0061870	positive regulation of hepatic stellate cell migration	1	2	53.5	0.0744175	0.238607
GO:0070101	positive regulation of chemokine-mediated signaling pathway	1	2	53.5	0.0744175	0.238607
GO:0070194	synaptonemal complex disassembly	1	2	53.5	0.0744175	0.238607
GO:0070427	nucleotide-binding oligomerization domain containing 1 signaling pathway	1	2	53.5	0.0744175	0.238607
GO:0070453	regulation of heme biosynthetic process	1	2	53.5	0.0744175	0.238607
GO:0070561	vitamin D receptor signaling pathway	1	2	53.5	0.0744175	0.238607
GO:0070904	transepithelial L-ascorbic acid transport	1	2	53.5	0.0744175	0.238607
GO:0071264	positive regulation of translational initiation in response to starvation	1	2	53.5	0.0744175	0.238607
GO:0071506	cellular response to mycophenolic acid	1	2	53.5	0.0744175	0.238607
GO:0071846	actin filament debranching	1	2	53.5	0.0744175	0.238607
GO:0071931	positive regulation of transcription involved in G1/S transition of mitotic cell cycle	1	2	53.5	0.0744175	0.238607
GO:0090275	negative regulation of somatostatin secretion	1	2	53.5	0.0744175	0.238607
GO:0090362	positive regulation of platelet-derived growth factor production	1	2	53.5	0.0744175	0.238607
GO:0099011	neuronal dense core vesicle exocytosis	1	2	53.5	0.0744175	0.238607
GO:0099180	zinc ion import into synaptic vesicle	1	2	53.5	0.0744175	0.238607
GO:0099577	regulation of translation at presynapse, modulating synaptic transmission	1	2	53.5	0.0744175	0.238607
GO:0106091	glial cell projection elongation	1	2	53.5	0.0744175	0.238607
GO:1900170	negative regulation of glucocorticoid mediated signaling pathway	1	2	53.5	0.0744175	0.238607
GO:1900210	positive regulation of cardiolipin metabolic process	1	2	53.5	0.0744175	0.238607
GO:1901303	negative regulation of cargo loading into COPII-coated vesicle	1	2	53.5	0.0744175	0.238607
GO:1901329	regulation of odontoblast differentiation	1	2	53.5	0.0744175	0.238607
GO:1902310	positive regulation of peptidyl-serine dephosphorylation	1	2	53.5	0.0744175	0.238607
GO:1902340	negative regulation of chromosome condensation	1	2	53.5	0.0744175	0.238607
GO:1902436	negative regulation of male mating behavior	1	2	53.5	0.0744175	0.238607
GO:1902530	positive regulation of protein linear polyubiquitination	1	2	53.5	0.0744175	0.238607
GO:1902564	negative regulation of neutrophil activation	1	2	53.5	0.0744175	0.238607
GO:1902569	negative regulation of activation of Janus kinase activity	1	2	53.5	0.0744175	0.238607
GO:1902680	positive regulation of RNA biosynthetic process	1	2	53.5	0.0744175	0.238607
GO:1903006	positive regulation of protein K63-linked deubiquitination	1	2	53.5	0.0744175	0.238607
GO:1903147	negative regulation of autophagy of mitochondrion	1	2	53.5	0.0744175	0.238607
GO:1903579	negative regulation of ATP metabolic process	1	2	53.5	0.0744175	0.238607
GO:1903597	negative regulation of gap junction assembly	1	2	53.5	0.0744175	0.238607
GO:1903645	negative regulation of chaperone-mediated protein folding	1	2	53.5	0.0744175	0.238607
GO:1904695	positive regulation of vascular smooth muscle contraction	1	2	53.5	0.0744175	0.238607
GO:1904797	negative regulation of core promoter binding	1	2	53.5	0.0744175	0.238607
GO:1905053	positive regulation of base-excision repair	1	2	53.5	0.0744175	0.238607
GO:1905373	ceramide phosphoethanolamine biosynthetic process	1	2	53.5	0.0744175	0.238607
GO:1905775	negative regulation of DNA helicase activity	1	2	53.5	0.0744175	0.238607
GO:1990046	stress-induced mitochondrial fusion	1	2	53.5	0.0744175	0.238607
GO:1990145	maintenance of translational fidelity	1	2	53.5	0.0744175	0.238607
GO:1990173	protein localization to nucleoplasm	1	2	53.5	0.0744175	0.238607
GO:1990748	cellular detoxification	1	2	53.5	0.0744175	0.238607
GO:2000182	regulation of progesterone biosynthetic process	1	2	53.5	0.0744175	0.238607
GO:2000211	regulation of glutamate metabolic process	1	2	53.5	0.0744175	0.238607
GO:2000342	negative regulation of chemokine (C-X-C motif) ligand 2 production	1	2	53.5	0.0744175	0.238607
GO:2000349	negative regulation of CD40 signaling pathway	1	2	53.5	0.0744175	0.238607
GO:2000538	positive regulation of B cell chemotaxis	1	2	53.5	0.0744175	0.238607
GO:2000558	positive regulation of immunoglobulin production in mucosal tissue	1	2	53.5	0.0744175	0.238607
GO:2001272	positive regulation of cysteine-type endopeptidase activity involved in execution phase of apoptosis	1	2	53.5	0.0744175	0.238607
GO:0009615	response to virus	3	60	5.35	0.0750287	0.240263
GO:0007031	peroxisome organization	2	23	9.30435	0.0775158	0.245128
GO:0007095	mitotic G2 DNA damage checkpoint	2	23	9.30435	0.0775158	0.245128
GO:0008361	regulation of cell size	2	23	9.30435	0.0775158	0.245128
GO:0009948	anterior/posterior axis specification	2	23	9.30435	0.0775158	0.245128
GO:0032006	regulation of TOR signaling	2	23	9.30435	0.0775158	0.245128
GO:0032874	positive regulation of stress-activated MAPK cascade	2	23	9.30435	0.0775158	0.245128
GO:0042572	retinol metabolic process	2	23	9.30435	0.0775158	0.245128
GO:0045022	early endosome to late endosome transport	2	23	9.30435	0.0775158	0.245128
GO:0050850	positive regulation of calcium-mediated signaling	2	23	9.30435	0.0775158	0.245128
GO:0071539	protein localization to centrosome	2	23	9.30435	0.0775158	0.245128
GO:0006887	exocytosis	4	111	3.85586	0.0826553	0.261055
GO:0001676	long-chain fatty acid metabolic process	2	24	8.91667	0.084046	0.261213
GO:0006414	translational elongation	2	24	8.91667	0.084046	0.261213
GO:0006997	nucleus organization	2	24	8.91667	0.084046	0.261213
GO:0008652	cellular amino acid biosynthetic process	2	24	8.91667	0.084046	0.261213
GO:0010759	positive regulation of macrophage chemotaxis	2	24	8.91667	0.084046	0.261213
GO:0014032	neural crest cell development	2	24	8.91667	0.084046	0.261213
GO:0016925	protein sumoylation	2	24	8.91667	0.084046	0.261213
GO:0019226	transmission of nerve impulse	2	24	8.91667	0.084046	0.261213
GO:0021772	olfactory bulb development	2	24	8.91667	0.084046	0.261213
GO:0030325	adrenal gland development	2	24	8.91667	0.084046	0.261213
GO:0042474	middle ear morphogenesis	2	24	8.91667	0.084046	0.261213
GO:0046928	regulation of neurotransmitter secretion	2	24	8.91667	0.084046	0.261213
GO:1901223	negative regulation of NIK/NF-kappaB signaling	2	24	8.91667	0.084046	0.261213
GO:0006396	RNA processing	3	63	5.09524	0.0853077	0.264809
GO:0000165	MAPK cascade	3	64	5.01562	0.0888965	0.275612
GO:0007010	cytoskeleton organization	4	114	3.75439	0.0901271	0.278745
GO:0030334	regulation of cell migration	4	114	3.75439	0.0901271	0.278745
GO:0003382	epithelial cell morphogenesis	2	25	8.56	0.0907966	0.27945
GO:0007141	male meiosis I	2	25	8.56	0.0907966	0.27945
GO:0007498	mesoderm development	2	25	8.56	0.0907966	0.27945
GO:0032753	positive regulation of interleukin-4 production	2	25	8.56	0.0907966	0.27945
GO:0018105	peptidyl-serine phosphorylation	5	172	3.11047	0.0932719	0.286721
GO:0002250	adaptive immune response	5	173	3.09249	0.0953354	0.292709
GO:0045454	cell redox homeostasis	3	66	4.86364	0.096318	0.295367
GO:0007205	protein kinase C-activating G protein-coupled receptor signaling pathway	2	26	8.23077	0.0977629	0.296556
GO:0008585	female gonad development	2	26	8.23077	0.0977629	0.296556
GO:0009117	nucleotide metabolic process	2	26	8.23077	0.0977629	0.296556
GO:0030500	regulation of bone mineralization	2	26	8.23077	0.0977629	0.296556
GO:0032703	negative regulation of interleukin-2 production	2	26	8.23077	0.0977629	0.296556
GO:0045737	positive regulation of cyclin-dependent protein serine/threonine kinase activity	2	26	8.23077	0.0977629	0.296556
GO:0046580	negative regulation of Ras protein signal transduction	2	26	8.23077	0.0977629	0.296556
GO:0048168	regulation of neuronal synaptic plasticity	2	26	8.23077	0.0977629	0.296556
GO:0045668	negative regulation of osteoblast differentiation	3	67	4.79104	0.10015	0.296556
GO:1901224	positive regulation of NIK/NF-kappaB signaling	3	67	4.79104	0.10015	0.296556
GO:0001819	positive regulation of cytokine production	3	68	4.72059	0.104064	0.296556
GO:0030512	negative regulation of transforming growth factor beta receptor signaling pathway	3	68	4.72059	0.104064	0.296556
GO:0048146	positive regulation of fibroblast proliferation	3	68	4.72059	0.104064	0.296556
GO:0002052	positive regulation of neuroblast proliferation	2	27	7.92593	0.10494	0.296556
GO:0007131	reciprocal meiotic recombination	2	27	7.92593	0.10494	0.296556
GO:0035924	cellular response to vascular endothelial growth factor stimulus	2	27	7.92593	0.10494	0.296556
GO:0046329	negative regulation of JNK cascade	2	27	7.92593	0.10494	0.296556
GO:0060425	lung morphogenesis	2	27	7.92593	0.10494	0.296556
GO:0001692	histamine metabolic process	1	3	35.6667	0.111106	0.296556
GO:0001712	ectodermal cell fate commitment	1	3	35.6667	0.111106	0.296556
GO:0001827	inner cell mass cell fate commitment	1	3	35.6667	0.111106	0.296556
GO:0001828	inner cell mass cellular morphogenesis	1	3	35.6667	0.111106	0.296556
GO:0002121	inter-male aggressive behavior	1	3	35.6667	0.111106	0.296556
GO:0002277	myeloid dendritic cell activation involved in immune response	1	3	35.6667	0.111106	0.296556
GO:0002933	lipid hydroxylation	1	3	35.6667	0.111106	0.296556
GO:0002949	tRNA threonylcarbamoyladenosine modification	1	3	35.6667	0.111106	0.296556
GO:0003166	bundle of His development	1	3	35.6667	0.111106	0.296556
GO:0006419	alanyl-tRNA aminoacylation	1	3	35.6667	0.111106	0.296556
GO:0006776	vitamin A metabolic process	1	3	35.6667	0.111106	0.296556
GO:0006991	response to sterol depletion	1	3	35.6667	0.111106	0.296556
GO:0008050	female courtship behavior	1	3	35.6667	0.111106	0.296556
GO:0008612	peptidyl-lysine modification to peptidyl-hypusine	1	3	35.6667	0.111106	0.296556
GO:0009446	putrescine biosynthetic process	1	3	35.6667	0.111106	0.296556
GO:0009642	response to light intensity	1	3	35.6667	0.111106	0.296556
GO:0009991	response to extracellular stimulus	1	3	35.6667	0.111106	0.296556
GO:0010255	glucose mediated signaling pathway	1	3	35.6667	0.111106	0.296556
GO:0010952	positive regulation of peptidase activity	1	3	35.6667	0.111106	0.296556
GO:0010980	positive regulation of vitamin D 24-hydroxylase activity	1	3	35.6667	0.111106	0.296556
GO:0016479	negative regulation of transcription by RNA polymerase I	1	3	35.6667	0.111106	0.296556
GO:0016480	negative regulation of transcription by RNA polymerase III	1	3	35.6667	0.111106	0.296556
GO:0016539	intein-mediated protein splicing	1	3	35.6667	0.111106	0.296556
GO:0018894	dibenzo-p-dioxin metabolic process	1	3	35.6667	0.111106	0.296556
GO:0019344	cysteine biosynthetic process	1	3	35.6667	0.111106	0.296556
GO:0019371	cyclooxygenase pathway	1	3	35.6667	0.111106	0.296556
GO:0021543	pallium development	1	3	35.6667	0.111106	0.296556
GO:0021681	cerebellar granular layer development	1	3	35.6667	0.111106	0.296556
GO:0021778	oligodendrocyte cell fate specification	1	3	35.6667	0.111106	0.296556
GO:0030200	heparan sulfate proteoglycan catabolic process	1	3	35.6667	0.111106	0.296556
GO:0031339	negative regulation of vesicle fusion	1	3	35.6667	0.111106	0.296556
GO:0032375	negative regulation of cholesterol transport	1	3	35.6667	0.111106	0.296556
GO:0032663	regulation of interleukin-2 production	1	3	35.6667	0.111106	0.296556
GO:0032690	negative regulation of interleukin-1 alpha production	1	3	35.6667	0.111106	0.296556
GO:0033140	negative regulation of peptidyl-serine phosphorylation of STAT protein	1	3	35.6667	0.111106	0.296556
GO:0033143	regulation of intracellular steroid hormone receptor signaling pathway	1	3	35.6667	0.111106	0.296556
GO:0034140	negative regulation of toll-like receptor 3 signaling pathway	1	3	35.6667	0.111106	0.296556
GO:0034164	negative regulation of toll-like receptor 9 signaling pathway	1	3	35.6667	0.111106	0.296556
GO:0034263	positive regulation of autophagy in response to ER overload	1	3	35.6667	0.111106	0.296556
GO:0035284	brain segmentation	1	3	35.6667	0.111106	0.296556
GO:0035437	maintenance of protein localization in endoplasmic reticulum	1	3	35.6667	0.111106	0.296556
GO:0035544	negative regulation of SNARE complex assembly	1	3	35.6667	0.111106	0.296556
GO:0035710	CD4-positive, alpha-beta T cell activation	1	3	35.6667	0.111106	0.296556
GO:0035711	T-helper 1 cell activation	1	3	35.6667	0.111106	0.296556
GO:0036123	histone H3-K9 dimethylation	1	3	35.6667	0.111106	0.296556
GO:0036315	cellular response to sterol	1	3	35.6667	0.111106	0.296556
GO:0036514	dopaminergic neuron axon guidance	1	3	35.6667	0.111106	0.296556
GO:0036515	serotonergic neuron axon guidance	1	3	35.6667	0.111106	0.296556
GO:0042369	vitamin D catabolic process	1	3	35.6667	0.111106	0.296556
GO:0042660	positive regulation of cell fate specification	1	3	35.6667	0.111106	0.296556
GO:0043506	regulation of JUN kinase activity	1	3	35.6667	0.111106	0.296556
GO:0044065	regulation of respiratory system process	1	3	35.6667	0.111106	0.296556
GO:0044208	'de novo' AMP biosynthetic process	1	3	35.6667	0.111106	0.296556
GO:0044375	regulation of peroxisome size	1	3	35.6667	0.111106	0.296556
GO:0045585	positive regulation of cytotoxic T cell differentiation	1	3	35.6667	0.111106	0.296556
GO:0045917	positive regulation of complement activation	1	3	35.6667	0.111106	0.296556
GO:0046005	positive regulation of circadian sleep/wake cycle, REM sleep	1	3	35.6667	0.111106	0.296556
GO:0046483	heterocycle metabolic process	1	3	35.6667	0.111106	0.296556
GO:0046639	negative regulation of alpha-beta T cell differentiation	1	3	35.6667	0.111106	0.296556
GO:0046939	nucleotide phosphorylation	1	3	35.6667	0.111106	0.296556
GO:0048259	regulation of receptor-mediated endocytosis	1	3	35.6667	0.111106	0.296556
GO:0048261	negative regulation of receptor-mediated endocytosis	1	3	35.6667	0.111106	0.296556
GO:0048294	negative regulation of isotype switching to IgE isotypes	1	3	35.6667	0.111106	0.296556
GO:0050864	regulation of B cell activation	1	3	35.6667	0.111106	0.296556
GO:0051593	response to folic acid	1	3	35.6667	0.111106	0.296556
GO:0051615	histamine uptake	1	3	35.6667	0.111106	0.296556
GO:0051797	regulation of hair follicle development	1	3	35.6667	0.111106	0.296556
GO:0060086	circadian temperature homeostasis	1	3	35.6667	0.111106	0.296556
GO:0060221	retinal rod cell differentiation	1	3	35.6667	0.111106	0.296556
GO:0060242	contact inhibition	1	3	35.6667	0.111106	0.296556
GO:0060309	elastin catabolic process	1	3	35.6667	0.111106	0.296556
GO:0060559	positive regulation of calcidiol 1-monooxygenase activity	1	3	35.6667	0.111106	0.296556
GO:0061034	olfactory bulb mitral cell layer development	1	3	35.6667	0.111106	0.296556
GO:0061055	myotome development	1	3	35.6667	0.111106	0.296556
GO:0061138	morphogenesis of a branching epithelium	1	3	35.6667	0.111106	0.296556
GO:0061418	regulation of transcription from RNA polymerase II promoter in response to hypoxia	1	3	35.6667	0.111106	0.296556
GO:0061623	glycolytic process from galactose	1	3	35.6667	0.111106	0.296556
GO:0070086	ubiquitin-dependent endocytosis	1	3	35.6667	0.111106	0.296556
GO:0070433	negative regulation of nucleotide-binding oligomerization domain containing 2 signaling pathway	1	3	35.6667	0.111106	0.296556
GO:0070814	hydrogen sulfide biosynthetic process	1	3	35.6667	0.111106	0.296556
GO:0071393	cellular response to progesterone stimulus	1	3	35.6667	0.111106	0.296556
GO:0071663	positive regulation of granzyme B production	1	3	35.6667	0.111106	0.296556
GO:0072034	renal vesicle induction	1	3	35.6667	0.111106	0.296556
GO:0072697	protein localization to cell cortex	1	3	35.6667	0.111106	0.296556
GO:0072717	cellular response to actinomycin D	1	3	35.6667	0.111106	0.296556
GO:0097681	double-strand break repair via alternative nonhomologous end joining	1	3	35.6667	0.111106	0.296556
GO:0101030	tRNA-guanine transglycosylation	1	3	35.6667	0.111106	0.296556
GO:0106016	positive regulation of inflammatory response to wounding	1	3	35.6667	0.111106	0.296556
GO:1900100	positive regulation of plasma cell differentiation	1	3	35.6667	0.111106	0.296556
GO:1900451	positive regulation of glutamate receptor signaling pathway	1	3	35.6667	0.111106	0.296556
GO:1900625	positive regulation of monocyte aggregation	1	3	35.6667	0.111106	0.296556
GO:1901228	positive regulation of transcription from RNA polymerase II promoter involved in heart development	1	3	35.6667	0.111106	0.296556
GO:1901666	positive regulation of NAD+ ADP-ribosyltransferase activity	1	3	35.6667	0.111106	0.296556
GO:1902033	regulation of hematopoietic stem cell proliferation	1	3	35.6667	0.111106	0.296556
GO:1903251	multi-ciliated epithelial cell differentiation	1	3	35.6667	0.111106	0.296556
GO:1903292	protein localization to Golgi membrane	1	3	35.6667	0.111106	0.296556
GO:1903445	protein transport from ciliary membrane to plasma membrane	1	3	35.6667	0.111106	0.296556
GO:1903984	positive regulation of TRAIL-activated apoptotic signaling pathway	1	3	35.6667	0.111106	0.296556
GO:1904057	negative regulation of sensory perception of pain	1	3	35.6667	0.111106	0.296556
GO:1905555	positive regulation blood vessel branching	1	3	35.6667	0.111106	0.296556
GO:1905653	positive regulation of artery morphogenesis	1	3	35.6667	0.111106	0.296556
GO:1990108	protein linear deubiquitination	1	3	35.6667	0.111106	0.296556
GO:2000016	negative regulation of determination of dorsal identity	1	3	35.6667	0.111106	0.296556
GO:2000120	positive regulation of sodium-dependent phosphate transport	1	3	35.6667	0.111106	0.296556
GO:2000412	positive regulation of thymocyte migration	1	3	35.6667	0.111106	0.296556
GO:0008344	adult locomotory behavior	3	70	4.58571	0.112134	0.297301
GO:0000186	activation of MAPKK activity	2	28	7.64286	0.112324	0.297301
GO:0033137	negative regulation of peptidyl-serine phosphorylation	2	28	7.64286	0.112324	0.297301
GO:0033365	protein localization to organelle	2	28	7.64286	0.112324	0.297301
GO:0043409	negative regulation of MAPK cascade	2	28	7.64286	0.112324	0.297301
GO:0048041	focal adhesion assembly	2	28	7.64286	0.112324	0.297301
GO:0060045	positive regulation of cardiac muscle cell proliferation	2	28	7.64286	0.112324	0.297301
GO:1903076	regulation of protein localization to plasma membrane	2	28	7.64286	0.112324	0.297301
GO:0046777	protein autophosphorylation	5	182	2.93956	0.115235	0.304686
GO:0016192	vesicle-mediated transport	6	246	2.60976	0.11602	0.306443
GO:0006284	base-excision repair	2	29	7.37931	0.11991	0.314949
GO:0043950	positive regulation of cAMP-mediated signaling	2	29	7.37931	0.11991	0.314949
GO:0051384	response to glucocorticoid	2	29	7.37931	0.11991	0.314949
GO:0070328	triglyceride homeostasis	2	29	7.37931	0.11991	0.314949
GO:0070527	platelet aggregation	2	29	7.37931	0.11991	0.314949
GO:0005975	carbohydrate metabolic process	5	184	2.90761	0.119986	0.314949
GO:0006633	fatty acid biosynthetic process	3	72	4.45833	0.120528	0.31539
GO:0042472	inner ear morphogenesis	3	72	4.45833	0.120528	0.31539
GO:0051865	protein autoubiquitination	3	72	4.45833	0.120528	0.31539
GO:0007268	chemical synaptic transmission	5	186	2.87634	0.12486	0.326387
GO:0007166	cell surface receptor signaling pathway	5	187	2.86096	0.127342	0.332083
GO:0010906	regulation of glucose metabolic process	2	30	7.13333	0.127694	0.332083
GO:0045662	negative regulation of myoblast differentiation	2	30	7.13333	0.127694	0.332083
GO:0048247	lymphocyte chemotaxis	2	30	7.13333	0.127694	0.332083
GO:0048255	mRNA stabilization	2	30	7.13333	0.127694	0.332083
GO:0006511	ubiquitin-dependent protein catabolic process	6	252	2.54762	0.128277	0.333258
GO:0031398	positive regulation of protein ubiquitination	3	74	4.33784	0.129243	0.33508
GO:0045669	positive regulation of osteoblast differentiation	3	74	4.33784	0.129243	0.33508
GO:0006897	endocytosis	5	190	2.81579	0.134974	0.337701
GO:0002286	T cell activation involved in immune response	2	31	6.90323	0.135671	0.337701
GO:0006335	DNA replication-dependent nucleosome assembly	2	31	6.90323	0.135671	0.337701
GO:0007140	male meiotic nuclear division	2	31	6.90323	0.135671	0.337701
GO:0043392	negative regulation of DNA binding	2	31	6.90323	0.135671	0.337701
GO:0050768	negative regulation of neurogenesis	2	31	6.90323	0.135671	0.337701
GO:0035264	multicellular organism growth	4	130	3.29231	0.136793	0.337701
GO:0007267	cell-cell signaling	3	77	4.16883	0.142916	0.337701
GO:0007338	single fertilization	3	77	4.16883	0.142916	0.337701
GO:0031663	lipopolysaccharide-mediated signaling pathway	2	32	6.6875	0.143837	0.337701
GO:0045089	positive regulation of innate immune response	2	32	6.6875	0.143837	0.337701
GO:0048026	positive regulation of mRNA splicing, via spliceosome	2	32	6.6875	0.143837	0.337701
GO:0000454	snoRNA guided rRNA pseudouridine synthesis	1	4	26.75	0.147452	0.337701
GO:0000466	maturation of 5.8S rRNA from tricistronic rRNA transcript (SSU-rRNA, 5.8S rRNA, LSU-rRNA)	1	4	26.75	0.147452	0.337701
GO:0000720	pyrimidine dimer repair by nucleotide-excision repair	1	4	26.75	0.147452	0.337701
GO:0001834	trophectodermal cell proliferation	1	4	26.75	0.147452	0.337701
GO:0001845	phagolysosome assembly	1	4	26.75	0.147452	0.337701
GO:0002634	regulation of germinal center formation	1	4	26.75	0.147452	0.337701
GO:0002677	negative regulation of chronic inflammatory response	1	4	26.75	0.147452	0.337701
GO:0002865	negative regulation of acute inflammatory response to antigenic stimulus	1	4	26.75	0.147452	0.337701
GO:0003006	developmental process involved in reproduction	1	4	26.75	0.147452	0.337701
GO:0003093	regulation of glomerular filtration	1	4	26.75	0.147452	0.337701
GO:0006561	proline biosynthetic process	1	4	26.75	0.147452	0.337701
GO:0006574	valine catabolic process	1	4	26.75	0.147452	0.337701
GO:0007589	body fluid secretion	1	4	26.75	0.147452	0.337701
GO:0007603	phototransduction, visible light	1	4	26.75	0.147452	0.337701
GO:0009063	cellular amino acid catabolic process	1	4	26.75	0.147452	0.337701
GO:0009624	response to nematode	1	4	26.75	0.147452	0.337701
GO:0009649	entrainment of circadian clock	1	4	26.75	0.147452	0.337701
GO:0009743	response to carbohydrate	1	4	26.75	0.147452	0.337701
GO:0009786	regulation of asymmetric cell division	1	4	26.75	0.147452	0.337701
GO:0010536	positive regulation of activation of Janus kinase activity	1	4	26.75	0.147452	0.337701
GO:0010664	negative regulation of striated muscle cell apoptotic process	1	4	26.75	0.147452	0.337701
GO:0010748	negative regulation of plasma membrane long-chain fatty acid transport	1	4	26.75	0.147452	0.337701
GO:0010966	regulation of phosphate transport	1	4	26.75	0.147452	0.337701
GO:0014015	positive regulation of gliogenesis	1	4	26.75	0.147452	0.337701
GO:0014040	positive regulation of Schwann cell differentiation	1	4	26.75	0.147452	0.337701
GO:0014826	vein smooth muscle contraction	1	4	26.75	0.147452	0.337701
GO:0014829	vascular smooth muscle contraction	1	4	26.75	0.147452	0.337701
GO:0015936	coenzyme A metabolic process	1	4	26.75	0.147452	0.337701
GO:0016056	rhodopsin mediated signaling pathway	1	4	26.75	0.147452	0.337701
GO:0019673	GDP-mannose metabolic process	1	4	26.75	0.147452	0.337701
GO:0019695	choline metabolic process	1	4	26.75	0.147452	0.337701
GO:0021569	rhombomere 3 development	1	4	26.75	0.147452	0.337701
GO:0023051	regulation of signaling	1	4	26.75	0.147452	0.337701
GO:0030576	Cajal body organization	1	4	26.75	0.147452	0.337701
GO:0030730	sequestering of triglyceride	1	4	26.75	0.147452	0.337701
GO:0030886	negative regulation of myeloid dendritic cell activation	1	4	26.75	0.147452	0.337701
GO:0031345	negative regulation of cell projection organization	1	4	26.75	0.147452	0.337701
GO:0032079	positive regulation of endodeoxyribonuclease activity	1	4	26.75	0.147452	0.337701
GO:0032946	positive regulation of mononuclear cell proliferation	1	4	26.75	0.147452	0.337701
GO:0033387	putrescine biosynthetic process from ornithine	1	4	26.75	0.147452	0.337701
GO:0033499	galactose catabolic process via UDP-galactose	1	4	26.75	0.147452	0.337701
GO:0033762	response to glucagon	1	4	26.75	0.147452	0.337701
GO:0034197	triglyceride transport	1	4	26.75	0.147452	0.337701
GO:0034227	tRNA thio-modification	1	4	26.75	0.147452	0.337701
GO:0034381	plasma lipoprotein particle clearance	1	4	26.75	0.147452	0.337701
GO:0034382	chylomicron remnant clearance	1	4	26.75	0.147452	0.337701
GO:0034436	glycoprotein transport	1	4	26.75	0.147452	0.337701
GO:0034775	glutathione transmembrane transport	1	4	26.75	0.147452	0.337701
GO:0035330	regulation of hippo signaling	1	4	26.75	0.147452	0.337701
GO:0039534	negative regulation of MDA-5 signaling pathway	1	4	26.75	0.147452	0.337701
GO:0042092	type 2 immune response	1	4	26.75	0.147452	0.337701
GO:0042093	T-helper cell differentiation	1	4	26.75	0.147452	0.337701
GO:0042921	glucocorticoid receptor signaling pathway	1	4	26.75	0.147452	0.337701
GO:0042998	positive regulation of Golgi to plasma membrane protein transport	1	4	26.75	0.147452	0.337701
GO:0043137	DNA replication, removal of RNA primer	1	4	26.75	0.147452	0.337701
GO:0043489	RNA stabilization	1	4	26.75	0.147452	0.337701
GO:0045578	negative regulation of B cell differentiation	1	4	26.75	0.147452	0.337701
GO:0045604	regulation of epidermal cell differentiation	1	4	26.75	0.147452	0.337701
GO:0045619	regulation of lymphocyte differentiation	1	4	26.75	0.147452	0.337701
GO:0045834	positive regulation of lipid metabolic process	1	4	26.75	0.147452	0.337701
GO:0045876	positive regulation of sister chromatid cohesion	1	4	26.75	0.147452	0.337701
GO:0045903	positive regulation of translational fidelity	1	4	26.75	0.147452	0.337701
GO:0046040	IMP metabolic process	1	4	26.75	0.147452	0.337701
GO:0046060	dATP metabolic process	1	4	26.75	0.147452	0.337701
GO:0046320	regulation of fatty acid oxidation	1	4	26.75	0.147452	0.337701
GO:0046886	positive regulation of hormone biosynthetic process	1	4	26.75	0.147452	0.337701
GO:0046985	positive regulation of hemoglobin biosynthetic process	1	4	26.75	0.147452	0.337701
GO:0048133	male germ-line stem cell asymmetric division	1	4	26.75	0.147452	0.337701
GO:0048302	regulation of isotype switching to IgG isotypes	1	4	26.75	0.147452	0.337701
GO:0050851	antigen receptor-mediated signaling pathway	1	4	26.75	0.147452	0.337701
GO:0050855	regulation of B cell receptor signaling pathway	1	4	26.75	0.147452	0.337701
GO:0050994	regulation of lipid catabolic process	1	4	26.75	0.147452	0.337701
GO:0051051	negative regulation of transport	1	4	26.75	0.147452	0.337701
GO:0051084	'de novo' posttranslational protein folding	1	4	26.75	0.147452	0.337701
GO:0051142	positive regulation of NK T cell proliferation	1	4	26.75	0.147452	0.337701
GO:0051620	norepinephrine uptake	1	4	26.75	0.147452	0.337701
GO:0055129	L-proline biosynthetic process	1	4	26.75	0.147452	0.337701
GO:0060018	astrocyte fate commitment	1	4	26.75	0.147452	0.337701
GO:0060437	lung growth	1	4	26.75	0.147452	0.337701
GO:0060585	positive regulation of prostaglandin-endoperoxide synthase activity	1	4	26.75	0.147452	0.337701
GO:0060830	ciliary receptor clustering involved in smoothened signaling pathway	1	4	26.75	0.147452	0.337701
GO:0061030	epithelial cell differentiation involved in mammary gland alveolus development	1	4	26.75	0.147452	0.337701
GO:0061031	endodermal digestive tract morphogenesis	1	4	26.75	0.147452	0.337701
GO:0061789	dense core granule priming	1	4	26.75	0.147452	0.337701
GO:0070164	negative regulation of adiponectin secretion	1	4	26.75	0.147452	0.337701
GO:0071216	cellular response to biotic stimulus	1	4	26.75	0.147452	0.337701
GO:0071504	cellular response to heparin	1	4	26.75	0.147452	0.337701
GO:0071673	positive regulation of smooth muscle cell chemotaxis	1	4	26.75	0.147452	0.337701
GO:0072289	metanephric nephron tubule formation	1	4	26.75	0.147452	0.337701
GO:0072553	terminal button organization	1	4	26.75	0.147452	0.337701
GO:0086046	membrane depolarization during SA node cell action potential	1	4	26.75	0.147452	0.337701
GO:0086065	cell communication involved in cardiac conduction	1	4	26.75	0.147452	0.337701
GO:0090427	activation of meiosis	1	4	26.75	0.147452	0.337701
GO:0090669	telomerase RNA stabilization	1	4	26.75	0.147452	0.337701
GO:0097116	gephyrin clustering involved in postsynaptic density assembly	1	4	26.75	0.147452	0.337701
GO:0097167	circadian regulation of translation	1	4	26.75	0.147452	0.337701
GO:0097722	sperm motility	1	4	26.75	0.147452	0.337701
GO:0098698	postsynaptic specialization assembly	1	4	26.75	0.147452	0.337701
GO:0106015	negative regulation of inflammatory response to wounding	1	4	26.75	0.147452	0.337701
GO:1900425	negative regulation of defense response to bacterium	1	4	26.75	0.147452	0.337701
GO:1901300	positive regulation of hydrogen peroxide-mediated programmed cell death	1	4	26.75	0.147452	0.337701
GO:1901837	negative regulation of transcription of nucleolar large rRNA by RNA polymerase I	1	4	26.75	0.147452	0.337701
GO:1902109	negative regulation of mitochondrial membrane permeability involved in apoptotic process	1	4	26.75	0.147452	0.337701
GO:1902177	positive regulation of oxidative stress-induced intrinsic apoptotic signaling pathway	1	4	26.75	0.147452	0.337701
GO:1902219	negative regulation of intrinsic apoptotic signaling pathway in response to osmotic stress	1	4	26.75	0.147452	0.337701
GO:1903553	positive regulation of extracellular exosome assembly	1	4	26.75	0.147452	0.337701
GO:1904030	negative regulation of cyclin-dependent protein kinase activity	1	4	26.75	0.147452	0.337701
GO:1904717	regulation of AMPA glutamate receptor clustering	1	4	26.75	0.147452	0.337701
GO:1904872	regulation of telomerase RNA localization to Cajal body	1	4	26.75	0.147452	0.337701
GO:1904879	positive regulation of calcium ion transmembrane transport via high voltage-gated calcium channel	1	4	26.75	0.147452	0.337701
GO:1990001	inhibition of cysteine-type endopeptidase activity involved in apoptotic process	1	4	26.75	0.147452	0.337701
GO:1990168	protein K33-linked deubiquitination	1	4	26.75	0.147452	0.337701
GO:2000173	negative regulation of branching morphogenesis of a nerve	1	4	26.75	0.147452	0.337701
GO:2000255	negative regulation of male germ cell proliferation	1	4	26.75	0.147452	0.337701
GO:2000563	positive regulation of CD4-positive, alpha-beta T cell proliferation	1	4	26.75	0.147452	0.337701
GO:2000566	positive regulation of CD8-positive, alpha-beta T cell proliferation	1	4	26.75	0.147452	0.337701
GO:2000660	negative regulation of interleukin-1-mediated signaling pathway	1	4	26.75	0.147452	0.337701
GO:0032956	regulation of actin cytoskeleton organization	3	78	4.11538	0.147633	0.337808
GO:0002218	activation of innate immune response	2	33	6.48485	0.152188	0.34659
GO:0010719	negative regulation of epithelial to mesenchymal transition	2	33	6.48485	0.152188	0.34659
GO:0051085	chaperone cofactor-dependent protein refolding	2	33	6.48485	0.152188	0.34659
GO:0051209	release of sequestered calcium ion into cytosol	2	33	6.48485	0.152188	0.34659
GO:0051973	positive regulation of telomerase activity	2	33	6.48485	0.152188	0.34659
GO:0045165	cell fate commitment	3	79	4.06329	0.152428	0.34659
GO:0060395	SMAD protein signal transduction	3	79	4.06329	0.152428	0.34659
GO:0006919	activation of cysteine-type endopeptidase activity involved in apoptotic process	3	80	4.0125	0.157303	0.357032
GO:0032729	positive regulation of interferon-gamma production	3	80	4.0125	0.157303	0.357032
GO:0001818	negative regulation of cytokine production	2	34	6.29412	0.16072	0.36187
GO:0001824	blastocyst development	2	34	6.29412	0.16072	0.36187
GO:0002040	sprouting angiogenesis	2	34	6.29412	0.16072	0.36187
GO:0048709	oligodendrocyte differentiation	2	34	6.29412	0.16072	0.36187
GO:0051281	positive regulation of release of sequestered calcium ion into cytosol	2	34	6.29412	0.16072	0.36187
GO:0051968	positive regulation of synaptic transmission, glutamatergic	2	34	6.29412	0.16072	0.36187
GO:0055074	calcium ion homeostasis	2	34	6.29412	0.16072	0.36187
GO:0071479	cellular response to ionizing radiation	2	34	6.29412	0.16072	0.36187
GO:0097746	regulation of blood vessel diameter	2	34	6.29412	0.16072	0.36187
GO:0007608	sensory perception of smell	4	1139	0.375768	0.164601	0.37028
GO:0007018	microtubule-based movement	3	82	3.91463	0.167287	0.372956
GO:0043087	regulation of GTPase activity	3	82	3.91463	0.167287	0.372956
GO:0050727	regulation of inflammatory response	3	82	3.91463	0.167287	0.372956
GO:0000079	regulation of cyclin-dependent protein serine/threonine kinase activity	2	35	6.11429	0.169428	0.372956
GO:0014065	phosphatidylinositol 3-kinase signaling	2	35	6.11429	0.169428	0.372956
GO:0046513	ceramide biosynthetic process	2	35	6.11429	0.169428	0.372956
GO:0070372	regulation of ERK1 and ERK2 cascade	2	35	6.11429	0.169428	0.372956
GO:0070507	regulation of microtubule cytoskeleton organization	2	35	6.11429	0.169428	0.372956
GO:0000226	microtubule cytoskeleton organization	4	140	3.05714	0.171901	0.372956
GO:0006310	DNA recombination	3	84	3.82143	0.177581	0.372956
GO:0034613	cellular protein localization	3	84	3.82143	0.177581	0.372956
GO:0002053	positive regulation of mesenchymal cell proliferation	2	36	5.94444	0.178309	0.372956
GO:0042832	defense response to protozoan	2	36	5.94444	0.178309	0.372956
GO:0043967	histone H4 acetylation	2	36	5.94444	0.178309	0.372956
GO:0051276	chromosome organization	2	36	5.94444	0.178309	0.372956
GO:0086091	regulation of heart rate by cardiac conduction	2	36	5.94444	0.178309	0.372956
GO:1904707	positive regulation of vascular smooth muscle cell proliferation	2	36	5.94444	0.178309	0.372956
GO:2001244	positive regulation of intrinsic apoptotic signaling pathway	2	36	5.94444	0.178309	0.372956
GO:0007160	cell-matrix adhesion	3	85	3.77647	0.182844	0.372956
GO:0007015	actin filament organization	4	143	2.99301	0.183332	0.372956
GO:0042593	glucose homeostasis	4	143	2.99301	0.183332	0.372956
GO:0000303	response to superoxide	1	5	21.4	0.18346	0.372956
GO:0001660	fever generation	1	5	21.4	0.18346	0.372956
GO:0001922	B-1 B cell homeostasis	1	5	21.4	0.18346	0.372956
GO:0002521	leukocyte differentiation	1	5	21.4	0.18346	0.372956
GO:0002719	negative regulation of cytokine production involved in immune response	1	5	21.4	0.18346	0.372956
GO:0002904	positive regulation of B cell apoptotic process	1	5	21.4	0.18346	0.372956
GO:0003100	regulation of systemic arterial blood pressure by endothelin	1	5	21.4	0.18346	0.372956
GO:0003105	negative regulation of glomerular filtration	1	5	21.4	0.18346	0.372956
GO:0003310	pancreatic A cell differentiation	1	5	21.4	0.18346	0.372956
GO:0003413	chondrocyte differentiation involved in endochondral bone morphogenesis	1	5	21.4	0.18346	0.372956
GO:0006550	isoleucine catabolic process	1	5	21.4	0.18346	0.372956
GO:0006567	threonine catabolic process	1	5	21.4	0.18346	0.372956
GO:0007199	G protein-coupled receptor signaling pathway coupled to cGMP nucleotide second messenger	1	5	21.4	0.18346	0.372956
GO:0007253	cytoplasmic sequestering of NF-kappaB	1	5	21.4	0.18346	0.372956
GO:0008228	opsonization	1	5	21.4	0.18346	0.372956
GO:0009804	coumarin metabolic process	1	5	21.4	0.18346	0.372956
GO:0010742	macrophage derived foam cell differentiation	1	5	21.4	0.18346	0.372956
GO:0010749	regulation of nitric oxide mediated signal transduction	1	5	21.4	0.18346	0.372956
GO:0010817	regulation of hormone levels	1	5	21.4	0.18346	0.372956
GO:0010829	negative regulation of glucose transmembrane transport	1	5	21.4	0.18346	0.372956
GO:0010936	negative regulation of macrophage cytokine production	1	5	21.4	0.18346	0.372956
GO:0015889	cobalamin transport	1	5	21.4	0.18346	0.372956
GO:0016071	mRNA metabolic process	1	5	21.4	0.18346	0.372956
GO:0016139	glycoside catabolic process	1	5	21.4	0.18346	0.372956
GO:0019346	transsulfuration	1	5	21.4	0.18346	0.372956
GO:0019724	B cell mediated immunity	1	5	21.4	0.18346	0.372956
GO:0030950	establishment or maintenance of actin cytoskeleton polarity	1	5	21.4	0.18346	0.372956
GO:0031077	post-embryonic camera-type eye development	1	5	21.4	0.18346	0.372956
GO:0031508	pericentric heterochromatin assembly	1	5	21.4	0.18346	0.372956
GO:0032527	protein exit from endoplasmic reticulum	1	5	21.4	0.18346	0.372956
GO:0032677	regulation of interleukin-8 production	1	5	21.4	0.18346	0.372956
GO:0032889	regulation of vacuole fusion, non-autophagic	1	5	21.4	0.18346	0.372956
GO:0033088	negative regulation of immature T cell proliferation in thymus	1	5	21.4	0.18346	0.372956
GO:0033092	positive regulation of immature T cell proliferation in thymus	1	5	21.4	0.18346	0.372956
GO:0034112	positive regulation of homotypic cell-cell adhesion	1	5	21.4	0.18346	0.372956
GO:0034136	negative regulation of toll-like receptor 2 signaling pathway	1	5	21.4	0.18346	0.372956
GO:0035469	determination of pancreatic left/right asymmetry	1	5	21.4	0.18346	0.372956
GO:0035470	positive regulation of vascular wound healing	1	5	21.4	0.18346	0.372956
GO:0035519	protein K29-linked ubiquitination	1	5	21.4	0.18346	0.372956
GO:0035523	protein K29-linked deubiquitination	1	5	21.4	0.18346	0.372956
GO:0035744	T-helper 1 cell cytokine production	1	5	21.4	0.18346	0.372956
GO:0042482	positive regulation of odontogenesis	1	5	21.4	0.18346	0.372956
GO:0042501	serine phosphorylation of STAT protein	1	5	21.4	0.18346	0.372956
GO:0043152	induction of bacterial agglutination	1	5	21.4	0.18346	0.372956
GO:0043320	natural killer cell degranulation	1	5	21.4	0.18346	0.372956
GO:0043328	protein transport to vacuole involved in ubiquitin-dependent protein catabolic process via the multivesicular body sorting pathway	1	5	21.4	0.18346	0.372956
GO:0043490	malate-aspartate shuttle	1	5	21.4	0.18346	0.372956
GO:0043516	regulation of DNA damage response, signal transduction by p53 class mediator	1	5	21.4	0.18346	0.372956
GO:0043987	histone H3-S10 phosphorylation	1	5	21.4	0.18346	0.372956
GO:0045541	negative regulation of cholesterol biosynthetic process	1	5	21.4	0.18346	0.372956
GO:0045682	regulation of epidermis development	1	5	21.4	0.18346	0.372956
GO:0046878	positive regulation of saliva secretion	1	5	21.4	0.18346	0.372956
GO:0048022	negative regulation of melanin biosynthetic process	1	5	21.4	0.18346	0.372956
GO:0048254	snoRNA localization	1	5	21.4	0.18346	0.372956
GO:0048496	maintenance of animal organ identity	1	5	21.4	0.18346	0.372956
GO:0048742	regulation of skeletal muscle fiber development	1	5	21.4	0.18346	0.372956
GO:0050999	regulation of nitric-oxide synthase activity	1	5	21.4	0.18346	0.372956
GO:0051135	positive regulation of NK T cell activation	1	5	21.4	0.18346	0.372956
GO:0051387	negative regulation of neurotrophin TRK receptor signaling pathway	1	5	21.4	0.18346	0.372956
GO:0060005	vestibular reflex	1	5	21.4	0.18346	0.372956
GO:0060363	cranial suture morphogenesis	1	5	21.4	0.18346	0.372956
GO:0060435	bronchiole development	1	5	21.4	0.18346	0.372956
GO:0061041	regulation of wound healing	1	5	21.4	0.18346	0.372956
GO:0070169	positive regulation of biomineral tissue development	1	5	21.4	0.18346	0.372956
GO:0070940	dephosphorylation of RNA polymerase II C-terminal domain	1	5	21.4	0.18346	0.372956
GO:0070945	neutrophil mediated killing of gram-negative bacterium	1	5	21.4	0.18346	0.372956
GO:0071236	cellular response to antibiotic	1	5	21.4	0.18346	0.372956
GO:0071866	negative regulation of apoptotic process in bone marrow	1	5	21.4	0.18346	0.372956
GO:0071870	cellular response to catecholamine stimulus	1	5	21.4	0.18346	0.372956
GO:0071947	protein deubiquitination involved in ubiquitin-dependent protein catabolic process	1	5	21.4	0.18346	0.372956
GO:0072344	rescue of stalled ribosome	1	5	21.4	0.18346	0.372956
GO:0072498	embryonic skeletal joint development	1	5	21.4	0.18346	0.372956
GO:0072656	maintenance of protein location in mitochondrion	1	5	21.4	0.18346	0.372956
GO:0075525	viral translational termination-reinitiation	1	5	21.4	0.18346	0.372956
GO:0090038	negative regulation of protein kinase C signaling	1	5	21.4	0.18346	0.372956
GO:0090114	COPII-coated vesicle budding	1	5	21.4	0.18346	0.372956
GO:0090184	positive regulation of kidney development	1	5	21.4	0.18346	0.372956
GO:0090271	positive regulation of fibroblast growth factor production	1	5	21.4	0.18346	0.372956
GO:0090335	regulation of brown fat cell differentiation	1	5	21.4	0.18346	0.372956
GO:0090461	glutamate homeostasis	1	5	21.4	0.18346	0.372956
GO:0098535	de novo centriole assembly involved in multi-ciliated epithelial cell differentiation	1	5	21.4	0.18346	0.372956
GO:0099502	calcium-dependent activation of synaptic vesicle fusion	1	5	21.4	0.18346	0.372956
GO:0140206	dipeptide import across plasma membrane	1	5	21.4	0.18346	0.372956
GO:1900452	regulation of long-term synaptic depression	1	5	21.4	0.18346	0.372956
GO:1901841	regulation of high voltage-gated calcium channel activity	1	5	21.4	0.18346	0.372956
GO:1901896	positive regulation of calcium-transporting ATPase activity	1	5	21.4	0.18346	0.372956
GO:1902474	positive regulation of protein localization to synapse	1	5	21.4	0.18346	0.372956
GO:1902512	positive regulation of apoptotic DNA fragmentation	1	5	21.4	0.18346	0.372956
GO:1902991	regulation of amyloid precursor protein catabolic process	1	5	21.4	0.18346	0.372956
GO:1903026	negative regulation of RNA polymerase II regulatory region sequence-specific DNA binding	1	5	21.4	0.18346	0.372956
GO:1903039	positive regulation of leukocyte cell-cell adhesion	1	5	21.4	0.18346	0.372956
GO:1903232	melanosome assembly	1	5	21.4	0.18346	0.372956
GO:1904261	positive regulation of basement membrane assembly involved in embryonic body morphogenesis	1	5	21.4	0.18346	0.372956
GO:1990416	cellular response to brain-derived neurotrophic factor stimulus	1	5	21.4	0.18346	0.372956
GO:1990441	negative regulation of transcription from RNA polymerase II promoter in response to endoplasmic reticulum stress	1	5	21.4	0.18346	0.372956
GO:1990592	protein K69-linked ufmylation	1	5	21.4	0.18346	0.372956
GO:2000321	positive regulation of T-helper 17 cell differentiation	1	5	21.4	0.18346	0.372956
GO:2000324	positive regulation of glucocorticoid receptor signaling pathway	1	5	21.4	0.18346	0.372956
GO:2001242	regulation of intrinsic apoptotic signaling pathway	1	5	21.4	0.18346	0.372956
GO:0001837	epithelial to mesenchymal transition	2	37	5.78378	0.187359	0.378755
GO:0008219	cell death	2	37	5.78378	0.187359	0.378755
GO:0034614	cellular response to reactive oxygen species	2	37	5.78378	0.187359	0.378755
GO:0045664	regulation of neuron differentiation	2	37	5.78378	0.187359	0.378755
GO:0048008	platelet-derived growth factor receptor signaling pathway	2	37	5.78378	0.187359	0.378755
GO:0051482	positive regulation of cytosolic calcium ion concentration involved in phospholipase C-activating G protein-coupled signaling pathway	2	37	5.78378	0.187359	0.378755
GO:0055007	cardiac muscle cell differentiation	2	37	5.78378	0.187359	0.378755
GO:0006334	nucleosome assembly	3	87	3.68966	0.193599	0.391059
GO:0007080	mitotic metaphase plate congression	2	38	5.63158	0.196573	0.396117
GO:0030032	lamellipodium assembly	2	38	5.63158	0.196573	0.396117
GO:2001234	negative regulation of apoptotic signaling pathway	2	38	5.63158	0.196573	0.396117
GO:0006096	glycolytic process	2	39	5.48718	0.205948	0.403092
GO:0006289	nucleotide-excision repair	2	39	5.48718	0.205948	0.403092
GO:0007029	endoplasmic reticulum organization	2	39	5.48718	0.205948	0.403092
GO:0009725	response to hormone	2	39	5.48718	0.205948	0.403092
GO:0016573	histone acetylation	2	39	5.48718	0.205948	0.403092
GO:0030001	metal ion transport	2	39	5.48718	0.205948	0.403092
GO:0042542	response to hydrogen peroxide	2	39	5.48718	0.205948	0.403092
GO:0043085	positive regulation of catalytic activity	2	39	5.48718	0.205948	0.403092
GO:2001235	positive regulation of apoptotic signaling pathway	2	39	5.48718	0.205948	0.403092
GO:0007601	visual perception	4	150	2.85333	0.21161	0.403092
GO:0008360	regulation of cell shape	4	150	2.85333	0.21161	0.403092
GO:0001707	mesoderm formation	2	40	5.35	0.215479	0.403092
GO:0001816	cytokine production	2	40	5.35	0.215479	0.403092
GO:0001835	blastocyst hatching	2	40	5.35	0.215479	0.403092
GO:0032735	positive regulation of interleukin-12 production	2	40	5.35	0.215479	0.403092
GO:0001822	kidney development	4	151	2.83444	0.215832	0.403092
GO:0001773	myeloid dendritic cell activation	1	6	17.8333	0.219131	0.403092
GO:0001821	histamine secretion	1	6	17.8333	0.219131	0.403092
GO:0002322	B cell proliferation involved in immune response	1	6	17.8333	0.219131	0.403092
GO:0002725	negative regulation of T cell cytokine production	1	6	17.8333	0.219131	0.403092
GO:0002860	positive regulation of natural killer cell mediated cytotoxicity directed against tumor cell target	1	6	17.8333	0.219131	0.403092
GO:0003056	regulation of vascular smooth muscle contraction	1	6	17.8333	0.219131	0.403092
GO:0006029	proteoglycan metabolic process	1	6	17.8333	0.219131	0.403092
GO:0006167	AMP biosynthetic process	1	6	17.8333	0.219131	0.403092
GO:0006307	DNA dealkylation involved in DNA repair	1	6	17.8333	0.219131	0.403092
GO:0006369	termination of RNA polymerase II transcription	1	6	17.8333	0.219131	0.403092
GO:0006531	aspartate metabolic process	1	6	17.8333	0.219131	0.403092
GO:0006778	porphyrin-containing compound metabolic process	1	6	17.8333	0.219131	0.403092
GO:0007144	female meiosis I	1	6	17.8333	0.219131	0.403092
GO:0007217	tachykinin receptor signaling pathway	1	6	17.8333	0.219131	0.403092
GO:0008211	glucocorticoid metabolic process	1	6	17.8333	0.219131	0.403092
GO:0008611	ether lipid biosynthetic process	1	6	17.8333	0.219131	0.403092
GO:0009168	purine ribonucleoside monophosphate biosynthetic process	1	6	17.8333	0.219131	0.403092
GO:0009620	response to fungus	1	6	17.8333	0.219131	0.403092
GO:0010756	positive regulation of plasminogen activation	1	6	17.8333	0.219131	0.403092
GO:0010815	bradykinin catabolic process	1	6	17.8333	0.219131	0.403092
GO:0010826	negative regulation of centrosome duplication	1	6	17.8333	0.219131	0.403092
GO:0010830	regulation of myotube differentiation	1	6	17.8333	0.219131	0.403092
GO:0014063	negative regulation of serotonin secretion	1	6	17.8333	0.219131	0.403092
GO:0015695	organic cation transport	1	6	17.8333	0.219131	0.403092
GO:0018126	protein hydroxylation	1	6	17.8333	0.219131	0.403092
GO:0018394	peptidyl-lysine acetylation	1	6	17.8333	0.219131	0.403092
GO:0019439	aromatic compound catabolic process	1	6	17.8333	0.219131	0.403092
GO:0019693	ribose phosphate metabolic process	1	6	17.8333	0.219131	0.403092
GO:0022417	protein maturation by protein folding	1	6	17.8333	0.219131	0.403092
GO:0030072	peptide hormone secretion	1	6	17.8333	0.219131	0.403092
GO:0030213	hyaluronan biosynthetic process	1	6	17.8333	0.219131	0.403092
GO:0031665	negative regulation of lipopolysaccharide-mediated signaling pathway	1	6	17.8333	0.219131	0.403092
GO:0031914	negative regulation of synaptic plasticity	1	6	17.8333	0.219131	0.403092
GO:0032269	negative regulation of cellular protein metabolic process	1	6	17.8333	0.219131	0.403092
GO:0032410	negative regulation of transporter activity	1	6	17.8333	0.219131	0.403092
GO:0033004	negative regulation of mast cell activation	1	6	17.8333	0.219131	0.403092
GO:0033085	negative regulation of T cell differentiation in thymus	1	6	17.8333	0.219131	0.403092
GO:0033135	regulation of peptidyl-serine phosphorylation	1	6	17.8333	0.219131	0.403092
GO:0033615	mitochondrial proton-transporting ATP synthase complex assembly	1	6	17.8333	0.219131	0.403092
GO:0033687	osteoblast proliferation	1	6	17.8333	0.219131	0.403092
GO:0034384	high-density lipoprotein particle clearance	1	6	17.8333	0.219131	0.403092
GO:0034499	late endosome to Golgi transport	1	6	17.8333	0.219131	0.403092
GO:0035092	sperm chromatin condensation	1	6	17.8333	0.219131	0.403092
GO:0035166	post-embryonic hemopoiesis	1	6	17.8333	0.219131	0.403092
GO:0035610	protein side chain deglutamylation	1	6	17.8333	0.219131	0.403092
GO:0036124	histone H3-K9 trimethylation	1	6	17.8333	0.219131	0.403092
GO:0036498	IRE1-mediated unfolded protein response	1	6	17.8333	0.219131	0.403092
GO:0038203	TORC2 signaling	1	6	17.8333	0.219131	0.403092
GO:0042256	mature ribosome assembly	1	6	17.8333	0.219131	0.403092
GO:0042471	ear morphogenesis	1	6	17.8333	0.219131	0.403092
GO:0042592	homeostatic process	1	6	17.8333	0.219131	0.403092
GO:0043305	negative regulation of mast cell degranulation	1	6	17.8333	0.219131	0.403092
GO:0043374	CD8-positive, alpha-beta T cell differentiation	1	6	17.8333	0.219131	0.403092
GO:0045347	negative regulation of MHC class II biosynthetic process	1	6	17.8333	0.219131	0.403092
GO:0046533	negative regulation of photoreceptor cell differentiation	1	6	17.8333	0.219131	0.403092
GO:0046541	saliva secretion	1	6	17.8333	0.219131	0.403092
GO:0047497	mitochondrion transport along microtubule	1	6	17.8333	0.219131	0.403092
GO:0048505	regulation of timing of cell differentiation	1	6	17.8333	0.219131	0.403092
GO:0048597	post-embryonic camera-type eye morphogenesis	1	6	17.8333	0.219131	0.403092
GO:0050819	negative regulation of coagulation	1	6	17.8333	0.219131	0.403092
GO:0051148	negative regulation of muscle cell differentiation	1	6	17.8333	0.219131	0.403092
GO:0051224	negative regulation of protein transport	1	6	17.8333	0.219131	0.403092
GO:0060316	positive regulation of ryanodine-sensitive calcium-release channel activity	1	6	17.8333	0.219131	0.403092
GO:0060372	regulation of atrial cardiac muscle cell membrane repolarization	1	6	17.8333	0.219131	0.403092
GO:0060708	spongiotrophoblast differentiation	1	6	17.8333	0.219131	0.403092
GO:0060742	epithelial cell differentiation involved in prostate gland development	1	6	17.8333	0.219131	0.403092
GO:0060761	negative regulation of response to cytokine stimulus	1	6	17.8333	0.219131	0.403092
GO:0061042	vascular wound healing	1	6	17.8333	0.219131	0.403092
GO:0070100	negative regulation of chemokine-mediated signaling pathway	1	6	17.8333	0.219131	0.403092
GO:0070487	monocyte aggregation	1	6	17.8333	0.219131	0.403092
GO:0070837	dehydroascorbic acid transport	1	6	17.8333	0.219131	0.403092
GO:0070972	protein localization to endoplasmic reticulum	1	6	17.8333	0.219131	0.403092
GO:0071422	succinate transmembrane transport	1	6	17.8333	0.219131	0.403092
GO:0071499	cellular response to laminar fluid shear stress	1	6	17.8333	0.219131	0.403092
GO:0071569	protein ufmylation	1	6	17.8333	0.219131	0.403092
GO:0071702	organic substance transport	1	6	17.8333	0.219131	0.403092
GO:0071910	determination of liver left/right asymmetry	1	6	17.8333	0.219131	0.403092
GO:0072089	stem cell proliferation	1	6	17.8333	0.219131	0.403092
GO:0072672	neutrophil extravasation	1	6	17.8333	0.219131	0.403092
GO:0086100	endothelin receptor signaling pathway	1	6	17.8333	0.219131	0.403092
GO:0090027	negative regulation of monocyte chemotaxis	1	6	17.8333	0.219131	0.403092
GO:0090031	positive regulation of steroid hormone biosynthetic process	1	6	17.8333	0.219131	0.403092
GO:0090080	positive regulation of MAPKKK cascade by fibroblast growth factor receptor signaling pathway	1	6	17.8333	0.219131	0.403092
GO:0090266	regulation of mitotic cell cycle spindle assembly checkpoint	1	6	17.8333	0.219131	0.403092
GO:0090503	RNA phosphodiester bond hydrolysis, exonucleolytic	1	6	17.8333	0.219131	0.403092
GO:0097119	postsynaptic density protein 95 clustering	1	6	17.8333	0.219131	0.403092
GO:0098779	positive regulation of mitophagy in response to mitochondrial depolarization	1	6	17.8333	0.219131	0.403092
GO:0099525	presynaptic dense core vesicle exocytosis	1	6	17.8333	0.219131	0.403092
GO:1901016	regulation of potassium ion transmembrane transporter activity	1	6	17.8333	0.219131	0.403092
GO:1901165	positive regulation of trophoblast cell migration	1	6	17.8333	0.219131	0.403092
GO:1901727	positive regulation of histone deacetylase activity	1	6	17.8333	0.219131	0.403092
GO:1901797	negative regulation of signal transduction by p53 class mediator	1	6	17.8333	0.219131	0.403092
GO:1902747	negative regulation of lens fiber cell differentiation	1	6	17.8333	0.219131	0.403092
GO:1902949	positive regulation of tau-protein kinase activity	1	6	17.8333	0.219131	0.403092
GO:1903588	negative regulation of blood vessel endothelial cell proliferation involved in sprouting angiogenesis	1	6	17.8333	0.219131	0.403092
GO:1903912	negative regulation of endoplasmic reticulum stress-induced eIF2 alpha phosphorylation	1	6	17.8333	0.219131	0.403092
GO:1903955	positive regulation of protein targeting to mitochondrion	1	6	17.8333	0.219131	0.403092
GO:1904751	positive regulation of protein localization to nucleolus	1	6	17.8333	0.219131	0.403092
GO:1904938	planar cell polarity pathway involved in axon guidance	1	6	17.8333	0.219131	0.403092
GO:2000110	negative regulation of macrophage apoptotic process	1	6	17.8333	0.219131	0.403092
GO:2000323	negative regulation of glucocorticoid receptor signaling pathway	1	6	17.8333	0.219131	0.403092
GO:2000672	negative regulation of motor neuron apoptotic process	1	6	17.8333	0.219131	0.403092
GO:2000757	negative regulation of peptidyl-lysine acetylation	1	6	17.8333	0.219131	0.403092
GO:2001268	negative regulation of cysteine-type endopeptidase activity involved in apoptotic signaling pathway	1	6	17.8333	0.219131	0.403092
GO:0045766	positive regulation of angiogenesis	4	152	2.81579	0.2201	0.404582
GO:0043547	positive regulation of GTPase activity	4	153	2.79739	0.224414	0.412212
GO:0001569	branching involved in blood vessel morphogenesis	2	41	5.21951	0.225165	0.412992
GO:0007249	I-kappaB kinase/NF-kappaB signaling	2	41	5.21951	0.225165	0.412992
GO:0050804	modulation of chemical synaptic transmission	3	94	3.41489	0.233607	0.427858
GO:0070588	calcium ion transmembrane transport	3	94	3.41489	0.233607	0.427858
GO:0031667	response to nutrient levels	2	42	5.09524	0.234999	0.429476
GO:0050796	regulation of insulin secretion	2	42	5.09524	0.234999	0.429476
GO:2000134	negative regulation of G1/S transition of mitotic cell cycle	2	42	5.09524	0.234999	0.429476
GO:0050852	T cell receptor signaling pathway	3	95	3.37895	0.239617	0.43552
GO:0010507	negative regulation of autophagy	2	43	4.97674	0.24498	0.43552
GO:0040018	positive regulation of multicellular organism growth	2	43	4.97674	0.24498	0.43552
GO:0043330	response to exogenous dsRNA	2	43	4.97674	0.24498	0.43552
GO:0045471	response to ethanol	2	43	4.97674	0.24498	0.43552
GO:0009887	animal organ morphogenesis	4	158	2.70886	0.246658	0.43552
GO:0060548	negative regulation of cell death	3	97	3.30928	0.251851	0.43552
GO:0000055	ribosomal large subunit export from nucleus	1	7	15.2857	0.254469	0.43552
GO:0001955	blood vessel maturation	1	7	15.2857	0.254469	0.43552
GO:0002232	leukocyte chemotaxis involved in inflammatory response	1	7	15.2857	0.254469	0.43552
GO:0002674	negative regulation of acute inflammatory response	1	7	15.2857	0.254469	0.43552
GO:0002819	regulation of adaptive immune response	1	7	15.2857	0.254469	0.43552
GO:0002829	negative regulation of type 2 immune response	1	7	15.2857	0.254469	0.43552
GO:0002830	positive regulation of type 2 immune response	1	7	15.2857	0.254469	0.43552
GO:0002839	positive regulation of immune response to tumor cell	1	7	15.2857	0.254469	0.43552
GO:0003231	cardiac ventricle development	1	7	15.2857	0.254469	0.43552
GO:0006012	galactose metabolic process	1	7	15.2857	0.254469	0.43552
GO:0006102	isocitrate metabolic process	1	7	15.2857	0.254469	0.43552
GO:0006595	polyamine metabolic process	1	7	15.2857	0.254469	0.43552
GO:0006703	estrogen biosynthetic process	1	7	15.2857	0.254469	0.43552
GO:0007256	activation of JNKK activity	1	7	15.2857	0.254469	0.43552
GO:0010573	vascular endothelial growth factor production	1	7	15.2857	0.254469	0.43552
GO:0010587	miRNA catabolic process	1	7	15.2857	0.254469	0.43552
GO:0010886	positive regulation of cholesterol storage	1	7	15.2857	0.254469	0.43552
GO:0010894	negative regulation of steroid biosynthetic process	1	7	15.2857	0.254469	0.43552
GO:0021798	forebrain dorsal/ventral pattern formation	1	7	15.2857	0.254469	0.43552
GO:0021854	hypothalamus development	1	7	15.2857	0.254469	0.43552
GO:0021902	commitment of neuronal cell to specific neuron type in forebrain	1	7	15.2857	0.254469	0.43552
GO:0030258	lipid modification	1	7	15.2857	0.254469	0.43552
GO:0030449	regulation of complement activation	1	7	15.2857	0.254469	0.43552
GO:0030728	ovulation	1	7	15.2857	0.254469	0.43552
GO:0030858	positive regulation of epithelial cell differentiation	1	7	15.2857	0.254469	0.43552
GO:0032488	Cdc42 protein signal transduction	1	7	15.2857	0.254469	0.43552
GO:0032808	lacrimal gland development	1	7	15.2857	0.254469	0.43552
GO:0032819	positive regulation of natural killer cell proliferation	1	7	15.2857	0.254469	0.43552
GO:0032873	negative regulation of stress-activated MAPK cascade	1	7	15.2857	0.254469	0.43552
GO:0033119	negative regulation of RNA splicing	1	7	15.2857	0.254469	0.43552
GO:0034316	negative regulation of Arp2/3 complex-mediated actin nucleation	1	7	15.2857	0.254469	0.43552
GO:0034982	mitochondrial protein processing	1	7	15.2857	0.254469	0.43552
GO:0035735	intraciliary transport involved in cilium assembly	1	7	15.2857	0.254469	0.43552
GO:0039536	negative regulation of RIG-I signaling pathway	1	7	15.2857	0.254469	0.43552
GO:0042045	epithelial fluid transport	1	7	15.2857	0.254469	0.43552
GO:0042509	regulation of tyrosine phosphorylation of STAT protein	1	7	15.2857	0.254469	0.43552
GO:0042634	regulation of hair cycle	1	7	15.2857	0.254469	0.43552
GO:0042760	very long-chain fatty acid catabolic process	1	7	15.2857	0.254469	0.43552
GO:0042769	DNA damage response, detection of DNA damage	1	7	15.2857	0.254469	0.43552
GO:0042904	9-cis-retinoic acid biosynthetic process	1	7	15.2857	0.254469	0.43552
GO:0043353	enucleate erythrocyte differentiation	1	7	15.2857	0.254469	0.43552
GO:0044320	cellular response to leptin stimulus	1	7	15.2857	0.254469	0.43552
GO:0044351	macropinocytosis	1	7	15.2857	0.254469	0.43552
GO:0044828	negative regulation by host of viral genome replication	1	7	15.2857	0.254469	0.43552
GO:0045063	T-helper 1 cell differentiation	1	7	15.2857	0.254469	0.43552
GO:0045162	clustering of voltage-gated sodium channels	1	7	15.2857	0.254469	0.43552
GO:0045630	positive regulation of T-helper 2 cell differentiation	1	7	15.2857	0.254469	0.43552
GO:0046685	response to arsenic-containing substance	1	7	15.2857	0.254469	0.43552
GO:0046879	hormone secretion	1	7	15.2857	0.254469	0.43552
GO:0048016	inositol phosphate-mediated signaling	1	7	15.2857	0.254469	0.43552
GO:0048387	negative regulation of retinoic acid receptor signaling pathway	1	7	15.2857	0.254469	0.43552
GO:0048633	positive regulation of skeletal muscle tissue growth	1	7	15.2857	0.254469	0.43552
GO:0048752	semicircular canal morphogenesis	1	7	15.2857	0.254469	0.43552
GO:0050859	negative regulation of B cell receptor signaling pathway	1	7	15.2857	0.254469	0.43552
GO:0051005	negative regulation of lipoprotein lipase activity	1	7	15.2857	0.254469	0.43552
GO:0051045	negative regulation of membrane protein ectodomain proteolysis	1	7	15.2857	0.254469	0.43552
GO:0051610	serotonin uptake	1	7	15.2857	0.254469	0.43552
GO:0051707	response to other organism	1	7	15.2857	0.254469	0.43552
GO:0051798	positive regulation of hair follicle development	1	7	15.2857	0.254469	0.43552
GO:0060449	bud elongation involved in lung branching	1	7	15.2857	0.254469	0.43552
GO:0060536	cartilage morphogenesis	1	7	15.2857	0.254469	0.43552
GO:0060613	fat pad development	1	7	15.2857	0.254469	0.43552
GO:0060628	regulation of ER to Golgi vesicle-mediated transport	1	7	15.2857	0.254469	0.43552
GO:0060754	positive regulation of mast cell chemotaxis	1	7	15.2857	0.254469	0.43552
GO:0060831	smoothened signaling pathway involved in dorsal/ventral neural tube patterning	1	7	15.2857	0.254469	0.43552
GO:0061072	iris morphogenesis	1	7	15.2857	0.254469	0.43552
GO:0061314	Notch signaling involved in heart development	1	7	15.2857	0.254469	0.43552
GO:0061743	motor learning	1	7	15.2857	0.254469	0.43552
GO:0070585	protein localization to mitochondrion	1	7	15.2857	0.254469	0.43552
GO:0071051	polyadenylation-dependent snoRNA 3'-end processing	1	7	15.2857	0.254469	0.43552
GO:0071219	cellular response to molecule of bacterial origin	1	7	15.2857	0.254469	0.43552
GO:0071224	cellular response to peptidoglycan	1	7	15.2857	0.254469	0.43552
GO:0071459	protein localization to chromosome, centromeric region	1	7	15.2857	0.254469	0.43552
GO:0072112	glomerular visceral epithelial cell differentiation	1	7	15.2857	0.254469	0.43552
GO:0072189	ureter development	1	7	15.2857	0.254469	0.43552
GO:0072675	osteoclast fusion	1	7	15.2857	0.254469	0.43552
GO:0090084	negative regulation of inclusion body assembly	1	7	15.2857	0.254469	0.43552
GO:0090166	Golgi disassembly	1	7	15.2857	0.254469	0.43552
GO:0090494	dopamine uptake	1	7	15.2857	0.254469	0.43552
GO:0150093	amyloid-beta clearance by transcytosis	1	7	15.2857	0.254469	0.43552
GO:1900113	negative regulation of histone H3-K9 trimethylation	1	7	15.2857	0.254469	0.43552
GO:1903573	negative regulation of response to endoplasmic reticulum stress	1	7	15.2857	0.254469	0.43552
GO:1904036	negative regulation of epithelial cell apoptotic process	1	7	15.2857	0.254469	0.43552
GO:1904357	negative regulation of telomere maintenance via telomere lengthening	1	7	15.2857	0.254469	0.43552
GO:1904428	negative regulation of tubulin deacetylation	1	7	15.2857	0.254469	0.43552
GO:2000491	positive regulation of hepatic stellate cell activation	1	7	15.2857	0.254469	0.43552
GO:2000510	positive regulation of dendritic cell chemotaxis	1	7	15.2857	0.254469	0.43552
GO:0006464	cellular protein modification process	2	44	4.86364	0.255103	0.436016
GO:0048863	stem cell differentiation	2	44	4.86364	0.255103	0.436016
GO:0008543	fibroblast growth factor receptor signaling pathway	2	46	4.65217	0.275762	0.470691
GO:1901998	toxin transport	2	46	4.65217	0.275762	0.470691
GO:0000902	cell morphogenesis	3	102	3.14706	0.283671	0.473367
GO:0001933	negative regulation of protein phosphorylation	3	102	3.14706	0.283671	0.473367
GO:0009411	response to UV	2	47	4.55319	0.286291	0.473367
GO:0045907	positive regulation of vasoconstriction	2	47	4.55319	0.286291	0.473367
GO:0051930	regulation of sensory perception of pain	2	47	4.55319	0.286291	0.473367
GO:0000375	RNA splicing, via transesterification reactions	1	8	13.375	0.289477	0.473367
GO:0001956	positive regulation of neurotransmitter secretion	1	8	13.375	0.289477	0.473367
GO:0002726	positive regulation of T cell cytokine production	1	8	13.375	0.289477	0.473367
GO:0003283	atrial septum development	1	8	13.375	0.289477	0.473367
GO:0003374	dynamin family protein polymerization involved in mitochondrial fission	1	8	13.375	0.289477	0.473367
GO:0003406	retinal pigment epithelium development	1	8	13.375	0.289477	0.473367
GO:0006333	chromatin assembly or disassembly	1	8	13.375	0.289477	0.473367
GO:0006348	chromatin silencing at telomere	1	8	13.375	0.289477	0.473367
GO:0006685	sphingomyelin catabolic process	1	8	13.375	0.289477	0.473367
GO:0007197	adenylate cyclase-inhibiting G protein-coupled acetylcholine receptor signaling pathway	1	8	13.375	0.289477	0.473367
GO:0007435	salivary gland morphogenesis	1	8	13.375	0.289477	0.473367
GO:0008064	regulation of actin polymerization or depolymerization	1	8	13.375	0.289477	0.473367
GO:0010518	positive regulation of phospholipase activity	1	8	13.375	0.289477	0.473367
GO:0010940	positive regulation of necrotic cell death	1	8	13.375	0.289477	0.473367
GO:0014037	Schwann cell differentiation	1	8	13.375	0.289477	0.473367
GO:0015844	monoamine transport	1	8	13.375	0.289477	0.473367
GO:0016570	histone modification	1	8	13.375	0.289477	0.473367
GO:0021978	telencephalon regionalization	1	8	13.375	0.289477	0.473367
GO:0022898	regulation of transmembrane transporter activity	1	8	13.375	0.289477	0.473367
GO:0031204	posttranslational protein targeting to membrane, translocation	1	8	13.375	0.289477	0.473367
GO:0031497	chromatin assembly	1	8	13.375	0.289477	0.473367
GO:0032287	peripheral nervous system myelin maintenance	1	8	13.375	0.289477	0.473367
GO:0034393	positive regulation of smooth muscle cell apoptotic process	1	8	13.375	0.289477	0.473367
GO:0043576	regulation of respiratory gaseous exchange	1	8	13.375	0.289477	0.473367
GO:0044387	negative regulation of protein kinase activity by regulation of protein phosphorylation	1	8	13.375	0.289477	0.473367
GO:0045986	negative regulation of smooth muscle contraction	1	8	13.375	0.289477	0.473367
GO:0046486	glycerolipid metabolic process	1	8	13.375	0.289477	0.473367
GO:0046755	viral budding	1	8	13.375	0.289477	0.473367
GO:0050869	negative regulation of B cell activation	1	8	13.375	0.289477	0.473367
GO:0051099	positive regulation of binding	1	8	13.375	0.289477	0.473367
GO:0051220	cytoplasmic sequestering of protein	1	8	13.375	0.289477	0.473367
GO:0051388	positive regulation of neurotrophin TRK receptor signaling pathway	1	8	13.375	0.289477	0.473367
GO:0055009	atrial cardiac muscle tissue morphogenesis	1	8	13.375	0.289477	0.473367
GO:0055062	phosphate ion homeostasis	1	8	13.375	0.289477	0.473367
GO:0060054	positive regulation of epithelial cell proliferation involved in wound healing	1	8	13.375	0.289477	0.473367
GO:0060055	angiogenesis involved in wound healing	1	8	13.375	0.289477	0.473367
GO:0060087	relaxation of vascular smooth muscle	1	8	13.375	0.289477	0.473367
GO:0060396	growth hormone receptor signaling pathway	1	8	13.375	0.289477	0.473367
GO:0060603	mammary gland duct morphogenesis	1	8	13.375	0.289477	0.473367
GO:0061000	negative regulation of dendritic spine development	1	8	13.375	0.289477	0.473367
GO:0061303	cornea development in camera-type eye	1	8	13.375	0.289477	0.473367
GO:0070129	regulation of mitochondrial translation	1	8	13.375	0.289477	0.473367
GO:0070828	heterochromatin organization	1	8	13.375	0.289477	0.473367
GO:0071420	cellular response to histamine	1	8	13.375	0.289477	0.473367
GO:0071493	cellular response to UV-B	1	8	13.375	0.289477	0.473367
GO:0071985	multivesicular body sorting pathway	1	8	13.375	0.289477	0.473367
GO:0072197	ureter morphogenesis	1	8	13.375	0.289477	0.473367
GO:0072574	hepatocyte proliferation	1	8	13.375	0.289477	0.473367
GO:0090324	negative regulation of oxidative phosphorylation	1	8	13.375	0.289477	0.473367
GO:0097151	positive regulation of inhibitory postsynaptic potential	1	8	13.375	0.289477	0.473367
GO:0098815	modulation of excitatory postsynaptic potential	1	8	13.375	0.289477	0.473367
GO:1900015	regulation of cytokine production involved in inflammatory response	1	8	13.375	0.289477	0.473367
GO:1900744	regulation of p38MAPK cascade	1	8	13.375	0.289477	0.473367
GO:1901029	negative regulation of mitochondrial outer membrane permeabilization involved in apoptotic signaling pathway	1	8	13.375	0.289477	0.473367
GO:1901642	nucleoside transmembrane transport	1	8	13.375	0.289477	0.473367
GO:1902231	positive regulation of intrinsic apoptotic signaling pathway in response to DNA damage	1	8	13.375	0.289477	0.473367
GO:1902806	regulation of cell cycle G1/S phase transition	1	8	13.375	0.289477	0.473367
GO:1903441	protein localization to ciliary membrane	1	8	13.375	0.289477	0.473367
GO:1904417	positive regulation of xenophagy	1	8	13.375	0.289477	0.473367
GO:2000809	positive regulation of synaptic vesicle clustering	1	8	13.375	0.289477	0.473367
GO:0002244	hematopoietic progenitor cell differentiation	3	103	3.1165	0.290242	0.474311
GO:0001916	positive regulation of T cell mediated cytotoxicity	2	48	4.45833	0.296949	0.484647
GO:0007163	establishment or maintenance of cell polarity	2	48	4.45833	0.296949	0.484647
GO:0006749	glutathione metabolic process	2	49	4.36735	0.307732	0.501276
GO:0007193	adenylate cyclase-inhibiting G protein-coupled receptor signaling pathway	2	49	4.36735	0.307732	0.501276
GO:0046427	positive regulation of JAK-STAT cascade	2	49	4.36735	0.307732	0.501276
GO:0000281	mitotic cytokinesis	2	50	4.28	0.318637	0.504667
GO:0001541	ovarian follicle development	2	50	4.28	0.318637	0.504667
GO:0001755	neural crest cell migration	2	50	4.28	0.318637	0.504667
GO:0006665	sphingolipid metabolic process	2	50	4.28	0.318637	0.504667
GO:0007162	negative regulation of cell adhesion	2	50	4.28	0.318637	0.504667
GO:0031334	positive regulation of protein complex assembly	2	50	4.28	0.318637	0.504667
GO:0043473	pigmentation	2	50	4.28	0.318637	0.504667
GO:0045597	positive regulation of cell differentiation	2	50	4.28	0.318637	0.504667
GO:0000212	meiotic spindle organization	1	9	11.8889	0.324159	0.504667
GO:0000423	mitophagy	1	9	11.8889	0.324159	0.504667
GO:0000492	box C/D snoRNP assembly	1	9	11.8889	0.324159	0.504667
GO:0000737	DNA catabolic process, endonucleolytic	1	9	11.8889	0.324159	0.504667
GO:0001973	adenosine receptor signaling pathway	1	9	11.8889	0.324159	0.504667
GO:0003416	endochondral bone growth	1	9	11.8889	0.324159	0.504667
GO:0005980	glycogen catabolic process	1	9	11.8889	0.324159	0.504667
GO:0006084	acetyl-CoA metabolic process	1	9	11.8889	0.324159	0.504667
GO:0006309	apoptotic DNA fragmentation	1	9	11.8889	0.324159	0.504667
GO:0006686	sphingomyelin biosynthetic process	1	9	11.8889	0.324159	0.504667
GO:0009308	amine metabolic process	1	9	11.8889	0.324159	0.504667
GO:0009437	carnitine metabolic process	1	9	11.8889	0.324159	0.504667
GO:0010225	response to UV-C	1	9	11.8889	0.324159	0.504667
GO:0010807	regulation of synaptic vesicle priming	1	9	11.8889	0.324159	0.504667
GO:0010888	negative regulation of lipid storage	1	9	11.8889	0.324159	0.504667
GO:0010907	positive regulation of glucose metabolic process	1	9	11.8889	0.324159	0.504667
GO:0014050	negative regulation of glutamate secretion	1	9	11.8889	0.324159	0.504667
GO:0016049	cell growth	1	9	11.8889	0.324159	0.504667
GO:0016559	peroxisome fission	1	9	11.8889	0.324159	0.504667
GO:0021796	cerebral cortex regionalization	1	9	11.8889	0.324159	0.504667
GO:0030212	hyaluronan metabolic process	1	9	11.8889	0.324159	0.504667
GO:0032494	response to peptidoglycan	1	9	11.8889	0.324159	0.504667
GO:0032623	interleukin-2 production	1	9	11.8889	0.324159	0.504667
GO:0034392	negative regulation of smooth muscle cell apoptotic process	1	9	11.8889	0.324159	0.504667
GO:0034551	mitochondrial respiratory chain complex III assembly	1	9	11.8889	0.324159	0.504667
GO:0035234	ectopic germ cell programmed cell death	1	9	11.8889	0.324159	0.504667
GO:0035425	autocrine signaling	1	9	11.8889	0.324159	0.504667
GO:0035767	endothelial cell chemotaxis	1	9	11.8889	0.324159	0.504667
GO:0036353	histone H2A-K119 monoubiquitination	1	9	11.8889	0.324159	0.504667
GO:0038092	nodal signaling pathway	1	9	11.8889	0.324159	0.504667
GO:0042754	negative regulation of circadian rhythm	1	9	11.8889	0.324159	0.504667
GO:0042994	cytoplasmic sequestering of transcription factor	1	9	11.8889	0.324159	0.504667
GO:0043405	regulation of MAP kinase activity	1	9	11.8889	0.324159	0.504667
GO:0043569	negative regulation of insulin-like growth factor receptor signaling pathway	1	9	11.8889	0.324159	0.504667
GO:0045687	positive regulation of glial cell differentiation	1	9	11.8889	0.324159	0.504667
GO:0046321	positive regulation of fatty acid oxidation	1	9	11.8889	0.324159	0.504667
GO:0046322	negative regulation of fatty acid oxidation	1	9	11.8889	0.324159	0.504667
GO:0046620	regulation of organ growth	1	9	11.8889	0.324159	0.504667
GO:0048730	epidermis morphogenesis	1	9	11.8889	0.324159	0.504667
GO:0048762	mesenchymal cell differentiation	1	9	11.8889	0.324159	0.504667
GO:0050667	homocysteine metabolic process	1	9	11.8889	0.324159	0.504667
GO:0050671	positive regulation of lymphocyte proliferation	1	9	11.8889	0.324159	0.504667
GO:0050996	positive regulation of lipid catabolic process	1	9	11.8889	0.324159	0.504667
GO:0051567	histone H3-K9 methylation	1	9	11.8889	0.324159	0.504667
GO:0052696	flavonoid glucuronidation	1	9	11.8889	0.324159	0.504667
GO:0052697	xenobiotic glucuronidation	1	9	11.8889	0.324159	0.504667
GO:0055015	ventricular cardiac muscle cell development	1	9	11.8889	0.324159	0.504667
GO:0055123	digestive system development	1	9	11.8889	0.324159	0.504667
GO:0060136	embryonic process involved in female pregnancy	1	9	11.8889	0.324159	0.504667
GO:0060323	head morphogenesis	1	9	11.8889	0.324159	0.504667
GO:0060485	mesenchyme development	1	9	11.8889	0.324159	0.504667
GO:0061384	heart trabecula morphogenesis	1	9	11.8889	0.324159	0.504667
GO:0070307	lens fiber cell development	1	9	11.8889	0.324159	0.504667
GO:0086009	membrane repolarization	1	9	11.8889	0.324159	0.504667
GO:0090305	nucleic acid phosphodiester bond hydrolysis	1	9	11.8889	0.324159	0.504667
GO:0090527	actin filament reorganization	1	9	11.8889	0.324159	0.504667
GO:0097104	postsynaptic membrane assembly	1	9	11.8889	0.324159	0.504667
GO:0098712	L-glutamate import across plasma membrane	1	9	11.8889	0.324159	0.504667
GO:1900222	negative regulation of amyloid-beta clearance	1	9	11.8889	0.324159	0.504667
GO:1902254	negative regulation of intrinsic apoptotic signaling pathway by p53 class mediator	1	9	11.8889	0.324159	0.504667
GO:1903140	regulation of establishment of endothelial barrier	1	9	11.8889	0.324159	0.504667
GO:2000253	positive regulation of feeding behavior	1	9	11.8889	0.324159	0.504667
GO:2000562	negative regulation of CD4-positive, alpha-beta T cell proliferation	1	9	11.8889	0.324159	0.504667
GO:2000969	positive regulation of AMPA receptor activity	1	9	11.8889	0.324159	0.504667
GO:0006936	muscle contraction	2	52	4.11538	0.3408	0.529274
GO:0031122	cytoplasmic microtubule organization	2	52	4.11538	0.3408	0.529274
GO:0032024	positive regulation of insulin secretion	2	52	4.11538	0.3408	0.529274
GO:0071333	cellular response to glucose stimulus	2	52	4.11538	0.3408	0.529274
GO:0006986	response to unfolded protein	2	53	4.03774	0.352052	0.533249
GO:0034644	cellular response to UV	2	53	4.03774	0.352052	0.533249
GO:0035690	cellular response to drug	2	53	4.03774	0.352052	0.533249
GO:0048705	skeletal system morphogenesis	2	53	4.03774	0.352052	0.533249
GO:0002315	marginal zone B cell differentiation	1	10	10.7	0.358517	0.533249
GO:0003149	membranous septum morphogenesis	1	10	10.7	0.358517	0.533249
GO:0003309	type B pancreatic cell differentiation	1	10	10.7	0.358517	0.533249
GO:0006013	mannose metabolic process	1	10	10.7	0.358517	0.533249
GO:0006072	glycerol-3-phosphate metabolic process	1	10	10.7	0.358517	0.533249
GO:0006283	transcription-coupled nucleotide-excision repair	1	10	10.7	0.358517	0.533249
GO:0006388	tRNA splicing, via endonucleolytic cleavage and ligation	1	10	10.7	0.358517	0.533249
GO:0006390	mitochondrial transcription	1	10	10.7	0.358517	0.533249
GO:0006625	protein targeting to peroxisome	1	10	10.7	0.358517	0.533249
GO:0006646	phosphatidylethanolamine biosynthetic process	1	10	10.7	0.358517	0.533249
GO:0006995	cellular response to nitrogen starvation	1	10	10.7	0.358517	0.533249
GO:0007341	penetration of zona pellucida	1	10	10.7	0.358517	0.533249
GO:0009404	toxin metabolic process	1	10	10.7	0.358517	0.533249
GO:0009435	NAD biosynthetic process	1	10	10.7	0.358517	0.533249
GO:0009950	dorsal/ventral axis specification	1	10	10.7	0.358517	0.533249
GO:0010745	negative regulation of macrophage derived foam cell differentiation	1	10	10.7	0.358517	0.533249
GO:0010996	response to auditory stimulus	1	10	10.7	0.358517	0.533249
GO:0016125	sterol metabolic process	1	10	10.7	0.358517	0.533249
GO:0016188	synaptic vesicle maturation	1	10	10.7	0.358517	0.533249
GO:0016558	protein import into peroxisome matrix	1	10	10.7	0.358517	0.533249
GO:0018026	peptidyl-lysine monomethylation	1	10	10.7	0.358517	0.533249
GO:0019732	antifungal humoral response	1	10	10.7	0.358517	0.533249
GO:0021517	ventral spinal cord development	1	10	10.7	0.358517	0.533249
GO:0021587	cerebellum morphogenesis	1	10	10.7	0.358517	0.533249
GO:0021612	facial nerve structural organization	1	10	10.7	0.358517	0.533249
GO:0021860	pyramidal neuron development	1	10	10.7	0.358517	0.533249
GO:0022027	interkinetic nuclear migration	1	10	10.7	0.358517	0.533249
GO:0030518	intracellular steroid hormone receptor signaling pathway	1	10	10.7	0.358517	0.533249
GO:0031000	response to caffeine	1	10	10.7	0.358517	0.533249
GO:0032480	negative regulation of type I interferon production	1	10	10.7	0.358517	0.533249
GO:0032486	Rap protein signal transduction	1	10	10.7	0.358517	0.533249
GO:0032933	SREBP signaling pathway	1	10	10.7	0.358517	0.533249
GO:0035633	maintenance of permeability of blood-brain barrier	1	10	10.7	0.358517	0.533249
GO:0035871	protein K11-linked deubiquitination	1	10	10.7	0.358517	0.533249
GO:0042053	regulation of dopamine metabolic process	1	10	10.7	0.358517	0.533249
GO:0043276	anoikis	1	10	10.7	0.358517	0.533249
GO:0043922	negative regulation by host of viral transcription	1	10	10.7	0.358517	0.533249
GO:0045141	meiotic telomere clustering	1	10	10.7	0.358517	0.533249
GO:0045762	positive regulation of adenylate cyclase activity	1	10	10.7	0.358517	0.533249
GO:0045906	negative regulation of vasoconstriction	1	10	10.7	0.358517	0.533249
GO:0046638	positive regulation of alpha-beta T cell differentiation	1	10	10.7	0.358517	0.533249
GO:0046850	regulation of bone remodeling	1	10	10.7	0.358517	0.533249
GO:0048679	regulation of axon regeneration	1	10	10.7	0.358517	0.533249
GO:0048708	astrocyte differentiation	1	10	10.7	0.358517	0.533249
GO:0050795	regulation of behavior	1	10	10.7	0.358517	0.533249
GO:0050810	regulation of steroid biosynthetic process	1	10	10.7	0.358517	0.533249
GO:0051001	negative regulation of nitric-oxide synthase activity	1	10	10.7	0.358517	0.533249
GO:0051006	positive regulation of lipoprotein lipase activity	1	10	10.7	0.358517	0.533249
GO:0051247	positive regulation of protein metabolic process	1	10	10.7	0.358517	0.533249
GO:0051451	myoblast migration	1	10	10.7	0.358517	0.533249
GO:0051926	negative regulation of calcium ion transport	1	10	10.7	0.358517	0.533249
GO:0060052	neurofilament cytoskeleton organization	1	10	10.7	0.358517	0.533249
GO:0060135	maternal process involved in female pregnancy	1	10	10.7	0.358517	0.533249
GO:0060351	cartilage development involved in endochondral bone morphogenesis	1	10	10.7	0.358517	0.533249
GO:0060765	regulation of androgen receptor signaling pathway	1	10	10.7	0.358517	0.533249
GO:0071257	cellular response to electrical stimulus	1	10	10.7	0.358517	0.533249
GO:0090009	primitive streak formation	1	10	10.7	0.358517	0.533249
GO:0090091	positive regulation of extracellular matrix disassembly	1	10	10.7	0.358517	0.533249
GO:0090385	phagosome-lysosome fusion	1	10	10.7	0.358517	0.533249
GO:0097105	presynaptic membrane assembly	1	10	10.7	0.358517	0.533249
GO:0140115	export across plasma membrane	1	10	10.7	0.358517	0.533249
GO:0150077	regulation of neuroinflammatory response	1	10	10.7	0.358517	0.533249
GO:1900264	positive regulation of DNA-directed DNA polymerase activity	1	10	10.7	0.358517	0.533249
GO:1902742	apoptotic process involved in development	1	10	10.7	0.358517	0.533249
GO:1902808	positive regulation of cell cycle G1/S phase transition	1	10	10.7	0.358517	0.533249
GO:1903715	regulation of aerobic respiration	1	10	10.7	0.358517	0.533249
GO:2000391	positive regulation of neutrophil extravasation	1	10	10.7	0.358517	0.533249
GO:2001056	positive regulation of cysteine-type endopeptidase activity	1	10	10.7	0.358517	0.533249
GO:0008202	steroid metabolic process	3	115	2.7913	0.3742	0.55625
GO:0008630	intrinsic apoptotic signaling pathway in response to DNA damage	2	55	3.89091	0.374881	0.556282
GO:0009968	negative regulation of signal transduction	2	55	3.89091	0.374881	0.556282
GO:0042531	positive regulation of tyrosine phosphorylation of STAT protein	2	55	3.89091	0.374881	0.556282
GO:0006342	chromatin silencing	2	56	3.82143	0.386452	0.561139
GO:0035176	social behavior	2	56	3.82143	0.386452	0.561139
GO:0001525	angiogenesis	5	259	2.06564	0.38865	0.561139
GO:0000012	single strand break repair	1	11	9.72727	0.392554	0.561139
GO:0001763	morphogenesis of a branching structure	1	11	9.72727	0.392554	0.561139
GO:0001780	neutrophil homeostasis	1	11	9.72727	0.392554	0.561139
GO:0002262	myeloid cell homeostasis	1	11	9.72727	0.392554	0.561139
GO:0002637	regulation of immunoglobulin production	1	11	9.72727	0.392554	0.561139
GO:0002827	positive regulation of T-helper 1 type immune response	1	11	9.72727	0.392554	0.561139
GO:0006596	polyamine biosynthetic process	1	11	9.72727	0.392554	0.561139
GO:0007191	adenylate cyclase-activating dopamine receptor signaling pathway	1	11	9.72727	0.392554	0.561139
GO:0007292	female gamete generation	1	11	9.72727	0.392554	0.561139
GO:0009062	fatty acid catabolic process	1	11	9.72727	0.392554	0.561139
GO:0009913	epidermal cell differentiation	1	11	9.72727	0.392554	0.561139
GO:0010459	negative regulation of heart rate	1	11	9.72727	0.392554	0.561139
GO:0010898	positive regulation of triglyceride catabolic process	1	11	9.72727	0.392554	0.561139
GO:0015810	aspartate transmembrane transport	1	11	9.72727	0.392554	0.561139
GO:0018401	peptidyl-proline hydroxylation to 4-hydroxy-L-proline	1	11	9.72727	0.392554	0.561139
GO:0019363	pyridine nucleotide biosynthetic process	1	11	9.72727	0.392554	0.561139
GO:0019430	removal of superoxide radicals	1	11	9.72727	0.392554	0.561139
GO:0022414	reproductive process	1	11	9.72727	0.392554	0.561139
GO:0030643	cellular phosphate ion homeostasis	1	11	9.72727	0.392554	0.561139
GO:0031023	microtubule organizing center organization	1	11	9.72727	0.392554	0.561139
GO:0032060	bleb assembly	1	11	9.72727	0.392554	0.561139
GO:0032835	glomerulus development	1	11	9.72727	0.392554	0.561139
GO:0033700	phospholipid efflux	1	11	9.72727	0.392554	0.561139
GO:0035308	negative regulation of protein dephosphorylation	1	11	9.72727	0.392554	0.561139
GO:0035313	wound healing, spreading of epidermal cells	1	11	9.72727	0.392554	0.561139
GO:0035726	common myeloid progenitor cell proliferation	1	11	9.72727	0.392554	0.561139
GO:0035988	chondrocyte proliferation	1	11	9.72727	0.392554	0.561139
GO:0038180	nerve growth factor signaling pathway	1	11	9.72727	0.392554	0.561139
GO:0042759	long-chain fatty acid biosynthetic process	1	11	9.72727	0.392554	0.561139
GO:0042770	signal transduction in response to DNA damage	1	11	9.72727	0.392554	0.561139
GO:0042775	mitochondrial ATP synthesis coupled electron transport	1	11	9.72727	0.392554	0.561139
GO:0046599	regulation of centriole replication	1	11	9.72727	0.392554	0.561139
GO:0046632	alpha-beta T cell differentiation	1	11	9.72727	0.392554	0.561139
GO:0046834	lipid phosphorylation	1	11	9.72727	0.392554	0.561139
GO:0048541	Peyer's patch development	1	11	9.72727	0.392554	0.561139
GO:0048660	regulation of smooth muscle cell proliferation	1	11	9.72727	0.392554	0.561139
GO:0048680	positive regulation of axon regeneration	1	11	9.72727	0.392554	0.561139
GO:0048733	sebaceous gland development	1	11	9.72727	0.392554	0.561139
GO:0050687	negative regulation of defense response to virus	1	11	9.72727	0.392554	0.561139
GO:0050777	negative regulation of immune response	1	11	9.72727	0.392554	0.561139
GO:0050856	regulation of T cell receptor signaling pathway	1	11	9.72727	0.392554	0.561139
GO:0051156	glucose 6-phosphate metabolic process	1	11	9.72727	0.392554	0.561139
GO:0051646	mitochondrion localization	1	11	9.72727	0.392554	0.561139
GO:0060174	limb bud formation	1	11	9.72727	0.392554	0.561139
GO:0060253	negative regulation of glial cell proliferation	1	11	9.72727	0.392554	0.561139
GO:0060541	respiratory system development	1	11	9.72727	0.392554	0.561139
GO:0060907	positive regulation of macrophage cytokine production	1	11	9.72727	0.392554	0.561139
GO:0060972	left/right pattern formation	1	11	9.72727	0.392554	0.561139
GO:0061709	reticulophagy	1	11	9.72727	0.392554	0.561139
GO:0070213	protein auto-ADP-ribosylation	1	11	9.72727	0.392554	0.561139
GO:0070257	positive regulation of mucus secretion	1	11	9.72727	0.392554	0.561139
GO:0071383	cellular response to steroid hormone stimulus	1	11	9.72727	0.392554	0.561139
GO:0090160	Golgi to lysosome transport	1	11	9.72727	0.392554	0.561139
GO:0097484	dendrite extension	1	11	9.72727	0.392554	0.561139
GO:0098693	regulation of synaptic vesicle cycle	1	11	9.72727	0.392554	0.561139
GO:1901222	regulation of NIK/NF-kappaB signaling	1	11	9.72727	0.392554	0.561139
GO:1902260	negative regulation of delayed rectifier potassium channel activity	1	11	9.72727	0.392554	0.561139
GO:1904058	positive regulation of sensory perception of pain	1	11	9.72727	0.392554	0.561139
GO:1904862	inhibitory synapse assembly	1	11	9.72727	0.392554	0.561139
GO:1905907	negative regulation of amyloid fibril formation	1	11	9.72727	0.392554	0.561139
GO:2000145	regulation of cell motility	1	11	9.72727	0.392554	0.561139
GO:2000786	positive regulation of autophagosome assembly	1	11	9.72727	0.392554	0.561139
GO:0030324	lung development	3	118	2.72034	0.39659	0.566589
GO:0000381	regulation of alternative mRNA splicing, via spliceosome	2	57	3.75439	0.398124	0.56782
GO:0008286	insulin receptor signaling pathway	2	57	3.75439	0.398124	0.56782
GO:0050877	nervous system process	2	57	3.75439	0.398124	0.56782
GO:0006869	lipid transport	3	119	2.69748	0.40417	0.576119
GO:0034097	response to cytokine	2	58	3.68966	0.409893	0.583948
GO:0002526	acute inflammatory response	1	12	8.91667	0.426273	0.593922
GO:0003334	keratinocyte development	1	12	8.91667	0.426273	0.593922
GO:0006497	protein lipidation	1	12	8.91667	0.426273	0.593922
GO:0008406	gonad development	1	12	8.91667	0.426273	0.593922
GO:0010884	positive regulation of lipid storage	1	12	8.91667	0.426273	0.593922
GO:0014049	positive regulation of glutamate secretion	1	12	8.91667	0.426273	0.593922
GO:0014824	artery smooth muscle contraction	1	12	8.91667	0.426273	0.593922
GO:0016081	synaptic vesicle docking	1	12	8.91667	0.426273	0.593922
GO:0016926	protein desumoylation	1	12	8.91667	0.426273	0.593922
GO:0021794	thalamus development	1	12	8.91667	0.426273	0.593922
GO:0021953	central nervous system neuron differentiation	1	12	8.91667	0.426273	0.593922
GO:0030311	poly-N-acetyllactosamine biosynthetic process	1	12	8.91667	0.426273	0.593922
GO:0030949	positive regulation of vascular endothelial growth factor receptor signaling pathway	1	12	8.91667	0.426273	0.593922
GO:0031167	rRNA methylation	1	12	8.91667	0.426273	0.593922
GO:0031642	negative regulation of myelination	1	12	8.91667	0.426273	0.593922
GO:0031936	negative regulation of chromatin silencing	1	12	8.91667	0.426273	0.593922
GO:0032330	regulation of chondrocyte differentiation	1	12	8.91667	0.426273	0.593922
GO:0032754	positive regulation of interleukin-5 production	1	12	8.91667	0.426273	0.593922
GO:0032816	positive regulation of natural killer cell activation	1	12	8.91667	0.426273	0.593922
GO:0033089	positive regulation of T cell differentiation in thymus	1	12	8.91667	0.426273	0.593922
GO:0033673	negative regulation of kinase activity	1	12	8.91667	0.426273	0.593922
GO:0035455	response to interferon-alpha	1	12	8.91667	0.426273	0.593922
GO:0035456	response to interferon-beta	1	12	8.91667	0.426273	0.593922
GO:0035518	histone H2A monoubiquitination	1	12	8.91667	0.426273	0.593922
GO:0042246	tissue regeneration	1	12	8.91667	0.426273	0.593922
GO:0042416	dopamine biosynthetic process	1	12	8.91667	0.426273	0.593922
GO:0042633	hair cycle	1	12	8.91667	0.426273	0.593922
GO:0042640	anagen	1	12	8.91667	0.426273	0.593922
GO:0043586	tongue development	1	12	8.91667	0.426273	0.593922
GO:0043616	keratinocyte proliferation	1	12	8.91667	0.426273	0.593922
GO:0046688	response to copper ion	1	12	8.91667	0.426273	0.593922
GO:0050848	regulation of calcium-mediated signaling	1	12	8.91667	0.426273	0.593922
GO:0050982	detection of mechanical stimulus	1	12	8.91667	0.426273	0.593922
GO:0051974	negative regulation of telomerase activity	1	12	8.91667	0.426273	0.593922
GO:0070997	neuron death	1	12	8.91667	0.426273	0.593922
GO:0071498	cellular response to fluid shear stress	1	12	8.91667	0.426273	0.593922
GO:0071786	endoplasmic reticulum tubular network organization	1	12	8.91667	0.426273	0.593922
GO:0090136	epithelial cell-cell adhesion	1	12	8.91667	0.426273	0.593922
GO:1904996	positive regulation of leukocyte adhesion to vascular endothelial cell	1	12	8.91667	0.426273	0.593922
GO:2000810	regulation of bicellular tight junction assembly	1	12	8.91667	0.426273	0.593922
GO:0043123	positive regulation of I-kappaB kinase/NF-kappaB signaling	3	122	2.63115	0.427256	0.594965
GO:0008654	phospholipid biosynthetic process	2	60	3.56667	0.433714	0.603625
GO:0016197	endosomal transport	2	61	3.5082	0.445759	0.620048
GO:0001947	heart looping	2	62	3.45161	0.457891	0.62533
GO:0000083	regulation of transcription involved in G1/S transition of mitotic cell cycle	1	13	8.23077	0.459678	0.62533
GO:0000460	maturation of 5.8S rRNA	1	13	8.23077	0.459678	0.62533
GO:0002087	regulation of respiratory gaseous exchange by neurological system process	1	13	8.23077	0.459678	0.62533
GO:0002091	negative regulation of receptor internalization	1	13	8.23077	0.459678	0.62533
GO:0003198	epithelial to mesenchymal transition involved in endocardial cushion formation	1	13	8.23077	0.459678	0.62533
GO:0006103	2-oxoglutarate metabolic process	1	13	8.23077	0.459678	0.62533
GO:0007263	nitric oxide mediated signal transduction	1	13	8.23077	0.459678	0.62533
GO:0008347	glial cell migration	1	13	8.23077	0.459678	0.62533
GO:0010717	regulation of epithelial to mesenchymal transition	1	13	8.23077	0.459678	0.62533
GO:0010744	positive regulation of macrophage derived foam cell differentiation	1	13	8.23077	0.459678	0.62533
GO:0016572	histone phosphorylation	1	13	8.23077	0.459678	0.62533
GO:0016574	histone ubiquitination	1	13	8.23077	0.459678	0.62533
GO:0021756	striatum development	1	13	8.23077	0.459678	0.62533
GO:0030101	natural killer cell activation	1	13	8.23077	0.459678	0.62533
GO:0032635	interleukin-6 production	1	13	8.23077	0.459678	0.62533
GO:0033169	histone H3-K9 demethylation	1	13	8.23077	0.459678	0.62533
GO:0033619	membrane protein proteolysis	1	13	8.23077	0.459678	0.62533
GO:0034101	erythrocyte homeostasis	1	13	8.23077	0.459678	0.62533
GO:0034374	low-density lipoprotein particle remodeling	1	13	8.23077	0.459678	0.62533
GO:0035235	ionotropic glutamate receptor signaling pathway	1	13	8.23077	0.459678	0.62533
GO:0035810	positive regulation of urine volume	1	13	8.23077	0.459678	0.62533
GO:0038084	vascular endothelial growth factor signaling pathway	1	13	8.23077	0.459678	0.62533
GO:0043039	tRNA aminoacylation	1	13	8.23077	0.459678	0.62533
GO:0045591	positive regulation of regulatory T cell differentiation	1	13	8.23077	0.459678	0.62533
GO:0045830	positive regulation of isotype switching	1	13	8.23077	0.459678	0.62533
GO:0046339	diacylglycerol metabolic process	1	13	8.23077	0.459678	0.62533
GO:0046835	carbohydrate phosphorylation	1	13	8.23077	0.459678	0.62533
GO:0048667	cell morphogenesis involved in neuron differentiation	1	13	8.23077	0.459678	0.62533
GO:0048681	negative regulation of axon regeneration	1	13	8.23077	0.459678	0.62533
GO:0051382	kinetochore assembly	1	13	8.23077	0.459678	0.62533
GO:0060340	positive regulation of type I interferon-mediated signaling pathway	1	13	8.23077	0.459678	0.62533
GO:0060389	pathway-restricted SMAD protein phosphorylation	1	13	8.23077	0.459678	0.62533
GO:0060644	mammary gland epithelial cell differentiation	1	13	8.23077	0.459678	0.62533
GO:0060674	placenta blood vessel development	1	13	8.23077	0.459678	0.62533
GO:0060711	labyrinthine layer development	1	13	8.23077	0.459678	0.62533
GO:0071285	cellular response to lithium ion	1	13	8.23077	0.459678	0.62533
GO:0090110	cargo loading into COPII-coated vesicle	1	13	8.23077	0.459678	0.62533
GO:0097421	liver regeneration	1	13	8.23077	0.459678	0.62533
GO:1903206	negative regulation of hydrogen peroxide-induced cell death	1	13	8.23077	0.459678	0.62533
GO:2000146	negative regulation of cell motility	1	13	8.23077	0.459678	0.62533
GO:0045860	positive regulation of protein kinase activity	2	63	3.39683	0.470107	0.638831
GO:0071363	cellular response to growth factor stimulus	2	63	3.39683	0.470107	0.638831
GO:0030879	mammary gland development	2	64	3.34375	0.482404	0.654187
GO:0048666	neuron development	2	64	3.34375	0.482404	0.654187
GO:0000289	nuclear-transcribed mRNA poly(A) tail shortening	1	14	7.64286	0.492771	0.654187
GO:0001935	endothelial cell proliferation	1	14	7.64286	0.492771	0.654187
GO:0002064	epithelial cell development	1	14	7.64286	0.492771	0.654187
GO:0006790	sulfur compound metabolic process	1	14	7.64286	0.492771	0.654187
GO:0006900	vesicle budding from membrane	1	14	7.64286	0.492771	0.654187
GO:0010838	positive regulation of keratinocyte proliferation	1	14	7.64286	0.492771	0.654187
GO:0010955	negative regulation of protein processing	1	14	7.64286	0.492771	0.654187
GO:0015813	L-glutamate transmembrane transport	1	14	7.64286	0.492771	0.654187
GO:0018095	protein polyglutamylation	1	14	7.64286	0.492771	0.654187
GO:0021819	layer formation in cerebral cortex	1	14	7.64286	0.492771	0.654187
GO:0030705	cytoskeleton-dependent intracellular transport	1	14	7.64286	0.492771	0.654187
GO:0031076	embryonic camera-type eye development	1	14	7.64286	0.492771	0.654187
GO:0031629	synaptic vesicle fusion to presynaptic active zone membrane	1	14	7.64286	0.492771	0.654187
GO:0032736	positive regulation of interleukin-13 production	1	14	7.64286	0.492771	0.654187
GO:0033962	cytoplasmic mRNA processing body assembly	1	14	7.64286	0.492771	0.654187
GO:0034116	positive regulation of heterotypic cell-cell adhesion	1	14	7.64286	0.492771	0.654187
GO:0035815	positive regulation of renal sodium excretion	1	14	7.64286	0.492771	0.654187
GO:0042129	regulation of T cell proliferation	1	14	7.64286	0.492771	0.654187
GO:0042532	negative regulation of tyrosine phosphorylation of STAT protein	1	14	7.64286	0.492771	0.654187
GO:0042551	neuron maturation	1	14	7.64286	0.492771	0.654187
GO:0043508	negative regulation of JUN kinase activity	1	14	7.64286	0.492771	0.654187
GO:0045806	negative regulation of endocytosis	1	14	7.64286	0.492771	0.654187
GO:0045947	negative regulation of translational initiation	1	14	7.64286	0.492771	0.654187
GO:0046475	glycerophospholipid catabolic process	1	14	7.64286	0.492771	0.654187
GO:0048599	oocyte development	1	14	7.64286	0.492771	0.654187
GO:0050673	epithelial cell proliferation	1	14	7.64286	0.492771	0.654187
GO:0050805	negative regulation of synaptic transmission	1	14	7.64286	0.492771	0.654187
GO:0051290	protein heterotetramerization	1	14	7.64286	0.492771	0.654187
GO:0060009	Sertoli cell development	1	14	7.64286	0.492771	0.654187
GO:0060339	negative regulation of type I interferon-mediated signaling pathway	1	14	7.64286	0.492771	0.654187
GO:0061337	cardiac conduction	1	14	7.64286	0.492771	0.654187
GO:0061462	protein localization to lysosome	1	14	7.64286	0.492771	0.654187
GO:0071385	cellular response to glucocorticoid stimulus	1	14	7.64286	0.492771	0.654187
GO:0071482	cellular response to light stimulus	1	14	7.64286	0.492771	0.654187
GO:0071712	ER-associated misfolded protein catabolic process	1	14	7.64286	0.492771	0.654187
GO:0071850	mitotic cell cycle arrest	1	14	7.64286	0.492771	0.654187
GO:0090502	RNA phosphodiester bond hydrolysis, endonucleolytic	1	14	7.64286	0.492771	0.654187
GO:0097202	activation of cysteine-type endopeptidase activity	1	14	7.64286	0.492771	0.654187
GO:0097242	amyloid-beta clearance	1	14	7.64286	0.492771	0.654187
GO:0097284	hepatocyte apoptotic process	1	14	7.64286	0.492771	0.654187
GO:1900025	negative regulation of substrate adhesion-dependent cell spreading	1	14	7.64286	0.492771	0.654187
GO:2000177	regulation of neural precursor cell proliferation	1	14	7.64286	0.492771	0.654187
GO:0006813	potassium ion transport	3	132	2.43182	0.507731	0.673695
GO:0001778	plasma membrane repair	1	15	7.13333	0.525555	0.682333
GO:0001895	retina homeostasis	1	15	7.13333	0.525555	0.682333
GO:0006734	NADH metabolic process	1	15	7.13333	0.525555	0.682333
GO:0006828	manganese ion transport	1	15	7.13333	0.525555	0.682333
GO:0006939	smooth muscle contraction	1	15	7.13333	0.525555	0.682333
GO:0007588	excretion	1	15	7.13333	0.525555	0.682333
GO:0009048	dosage compensation by inactivation of X chromosome	1	15	7.13333	0.525555	0.682333
GO:0010820	positive regulation of T cell chemotaxis	1	15	7.13333	0.525555	0.682333
GO:0010832	negative regulation of myotube differentiation	1	15	7.13333	0.525555	0.682333
GO:0010918	positive regulation of mitochondrial membrane potential	1	15	7.13333	0.525555	0.682333
GO:0016322	neuron remodeling	1	15	7.13333	0.525555	0.682333
GO:0016584	nucleosome positioning	1	15	7.13333	0.525555	0.682333
GO:0030194	positive regulation of blood coagulation	1	15	7.13333	0.525555	0.682333
GO:0030195	negative regulation of blood coagulation	1	15	7.13333	0.525555	0.682333
GO:0030970	retrograde protein transport, ER to cytosol	1	15	7.13333	0.525555	0.682333
GO:0031103	axon regeneration	1	15	7.13333	0.525555	0.682333
GO:0032438	melanosome organization	1	15	7.13333	0.525555	0.682333
GO:0032680	regulation of tumor necrosis factor production	1	15	7.13333	0.525555	0.682333
GO:0032897	negative regulation of viral transcription	1	15	7.13333	0.525555	0.682333
GO:0034142	toll-like receptor 4 signaling pathway	1	15	7.13333	0.525555	0.682333
GO:0035563	positive regulation of chromatin binding	1	15	7.13333	0.525555	0.682333
GO:0042756	drinking behavior	1	15	7.13333	0.525555	0.682333
GO:0043117	positive regulation of vascular permeability	1	15	7.13333	0.525555	0.682333
GO:0043518	negative regulation of DNA damage response, signal transduction by p53 class mediator	1	15	7.13333	0.525555	0.682333
GO:0043923	positive regulation by host of viral transcription	1	15	7.13333	0.525555	0.682333
GO:0044257	cellular protein catabolic process	1	15	7.13333	0.525555	0.682333
GO:0045618	positive regulation of keratinocyte differentiation	1	15	7.13333	0.525555	0.682333
GO:0048011	neurotrophin TRK receptor signaling pathway	1	15	7.13333	0.525555	0.682333
GO:0048143	astrocyte activation	1	15	7.13333	0.525555	0.682333
GO:0048246	macrophage chemotaxis	1	15	7.13333	0.525555	0.682333
GO:0048566	embryonic digestive tract development	1	15	7.13333	0.525555	0.682333
GO:0050435	amyloid-beta metabolic process	1	15	7.13333	0.525555	0.682333
GO:0050884	neuromuscular process controlling posture	1	15	7.13333	0.525555	0.682333
GO:0050930	induction of positive chemotaxis	1	15	7.13333	0.525555	0.682333
GO:0060347	heart trabecula formation	1	15	7.13333	0.525555	0.682333
GO:0060993	kidney morphogenesis	1	15	7.13333	0.525555	0.682333
GO:0070932	histone H3 deacetylation	1	15	7.13333	0.525555	0.682333
GO:1902230	negative regulation of intrinsic apoptotic signaling pathway in response to DNA damage	1	15	7.13333	0.525555	0.682333
GO:1903364	positive regulation of cellular protein catabolic process	1	15	7.13333	0.525555	0.682333
GO:1903543	positive regulation of exosomal secretion	1	15	7.13333	0.525555	0.682333
GO:2000781	positive regulation of double-strand break repair	1	15	7.13333	0.525555	0.682333
GO:2001241	positive regulation of extrinsic apoptotic signaling pathway in absence of ligand	1	15	7.13333	0.525555	0.682333
GO:0006006	glucose metabolic process	2	68	3.14706	0.532354	0.690099
GO:0007612	learning	2	68	3.14706	0.532354	0.690099
GO:0034220	ion transmembrane transport	2	68	3.14706	0.532354	0.690099
GO:0006952	defense response	3	135	2.37778	0.53286	0.690402
GO:0042493	response to drug	3	136	2.36029	0.541332	0.701019
GO:0034765	regulation of ion transmembrane transport	3	137	2.34307	0.549849	0.706043
GO:0018107	peptidyl-threonine phosphorylation	2	70	3.05714	0.557752	0.706043
GO:0001522	pseudouridine synthesis	1	16	6.6875	0.558033	0.706043
GO:0006111	regulation of gluconeogenesis	1	16	6.6875	0.558033	0.706043
GO:0006491	N-glycan processing	1	16	6.6875	0.558033	0.706043
GO:0006656	phosphatidylcholine biosynthetic process	1	16	6.6875	0.558033	0.706043
GO:0007034	vacuolar transport	1	16	6.6875	0.558033	0.706043
GO:0007064	mitotic sister chromatid cohesion	1	16	6.6875	0.558033	0.706043
GO:0007271	synaptic transmission, cholinergic	1	16	6.6875	0.558033	0.706043
GO:0009311	oligosaccharide metabolic process	1	16	6.6875	0.558033	0.706043
GO:0010614	negative regulation of cardiac muscle hypertrophy	1	16	6.6875	0.558033	0.706043
GO:0014912	negative regulation of smooth muscle cell migration	1	16	6.6875	0.558033	0.706043
GO:0021799	cerebral cortex radially oriented cell migration	1	16	6.6875	0.558033	0.706043
GO:0022904	respiratory electron transport chain	1	16	6.6875	0.558033	0.706043
GO:0030502	negative regulation of bone mineralization	1	16	6.6875	0.558033	0.706043
GO:0032094	response to food	1	16	6.6875	0.558033	0.706043
GO:0032402	melanosome transport	1	16	6.6875	0.558033	0.706043
GO:0032515	negative regulation of phosphoprotein phosphatase activity	1	16	6.6875	0.558033	0.706043
GO:0032688	negative regulation of interferon-beta production	1	16	6.6875	0.558033	0.706043
GO:0032924	activin receptor signaling pathway	1	16	6.6875	0.558033	0.706043
GO:0033235	positive regulation of protein sumoylation	1	16	6.6875	0.558033	0.706043
GO:0035196	production of miRNAs involved in gene silencing by miRNA	1	16	6.6875	0.558033	0.706043
GO:0035729	cellular response to hepatocyte growth factor stimulus	1	16	6.6875	0.558033	0.706043
GO:0040019	positive regulation of embryonic development	1	16	6.6875	0.558033	0.706043
GO:0040037	negative regulation of fibroblast growth factor receptor signaling pathway	1	16	6.6875	0.558033	0.706043
GO:0042417	dopamine metabolic process	1	16	6.6875	0.558033	0.706043
GO:0043116	negative regulation of vascular permeability	1	16	6.6875	0.558033	0.706043
GO:0045793	positive regulation of cell size	1	16	6.6875	0.558033	0.706043
GO:0046426	negative regulation of JAK-STAT cascade	1	16	6.6875	0.558033	0.706043
GO:0046887	positive regulation of hormone secretion	1	16	6.6875	0.558033	0.706043
GO:0050862	positive regulation of T cell receptor signaling pathway	1	16	6.6875	0.558033	0.706043
GO:0050918	positive chemotaxis	1	16	6.6875	0.558033	0.706043
GO:0051044	positive regulation of membrane protein ectodomain proteolysis	1	16	6.6875	0.558033	0.706043
GO:0051279	regulation of release of sequestered calcium ion into cytosol	1	16	6.6875	0.558033	0.706043
GO:0055089	fatty acid homeostasis	1	16	6.6875	0.558033	0.706043
GO:0060259	regulation of feeding behavior	1	16	6.6875	0.558033	0.706043
GO:0061053	somite development	1	16	6.6875	0.558033	0.706043
GO:0070593	dendrite self-avoidance	1	16	6.6875	0.558033	0.706043
GO:0090051	negative regulation of cell migration involved in sprouting angiogenesis	1	16	6.6875	0.558033	0.706043
GO:0090141	positive regulation of mitochondrial fission	1	16	6.6875	0.558033	0.706043
GO:0090181	regulation of cholesterol metabolic process	1	16	6.6875	0.558033	0.706043
GO:0097623	potassium ion export across plasma membrane	1	16	6.6875	0.558033	0.706043
GO:1900181	negative regulation of protein localization to nucleus	1	16	6.6875	0.558033	0.706043
[truncated: 534 more rows]

## Sheet: 显著性功能所包含上调基因
go_id	go_name	enrichment	pvalue	FDR	gene_id	gene_name
GO:0006412	translation	23.9129	4.89117e-62	1.23893e-58	26451	Rpl27a
GO:0006412	translation	23.9129	4.89117e-62	1.23893e-58	26961	Rpl8
GO:0006412	translation	23.9129	4.89117e-62	1.23893e-58	27050	Rps3
GO:0006412	translation	23.9129	4.89117e-62	1.23893e-58	27367	Rpl3
GO:0006412	translation	23.9129	4.89117e-62	1.23893e-58	53356	Eif3g
GO:0006412	translation	23.9129	4.89117e-62	1.23893e-58	54127	Rps28
GO:0006412	translation	23.9129	4.89117e-62	1.23893e-58	54217	Rpl36
GO:0006412	translation	23.9129	4.89117e-62	1.23893e-58	55949	Eef1b2
GO:0006412	translation	23.9129	4.89117e-62	1.23893e-58	56282	Mrpl12
GO:0006412	translation	23.9129	4.89117e-62	1.23893e-58	57808	Rpl35a
GO:0006412	translation	23.9129	4.89117e-62	1.23893e-58	64659	Mrps14
GO:0006412	translation	23.9129	4.89117e-62	1.23893e-58	65019	Rpl23
GO:0006412	translation	23.9129	4.89117e-62	1.23893e-58	66242	Mrps16
GO:0006412	translation	23.9129	4.89117e-62	1.23893e-58	66419	Mrpl11
GO:0006412	translation	23.9129	4.89117e-62	1.23893e-58	66475	Rps23
GO:0006412	translation	23.9129	4.89117e-62	1.23893e-58	66480	Rpl15
GO:0006412	translation	23.9129	4.89117e-62	1.23893e-58	66481	Rps21
GO:0006412	translation	23.9129	4.89117e-62	1.23893e-58	14109	Fau
GO:0006412	translation	23.9129	4.89117e-62	1.23893e-58	14694	Rack1
GO:0006412	translation	23.9129	4.89117e-62	1.23893e-58	19652	Rbm3
GO:0006412	translation	23.9129	4.89117e-62	1.23893e-58	19921	Rpl19
GO:0006412	translation	23.9129	4.89117e-62	1.23893e-58	19933	Rpl21
GO:0006412	translation	23.9129	4.89117e-62	1.23893e-58	19934	Rpl22
GO:0006412	translation	23.9129	4.89117e-62	1.23893e-58	19935	Mrpl23
GO:0006412	translation	23.9129	4.89117e-62	1.23893e-58	19944	Rpl29
GO:0006412	translation	23.9129	4.89117e-62	1.23893e-58	19946	Rpl30
GO:0006412	translation	23.9129	4.89117e-62	1.23893e-58	19951	Rpl32
GO:0006412	translation	23.9129	4.89117e-62	1.23893e-58	19988	Rpl6
GO:0006412	translation	23.9129	4.89117e-62	1.23893e-58	19989	Rpl7
GO:0006412	translation	23.9129	4.89117e-62	1.23893e-58	20005	Rpl9
GO:0006412	translation	23.9129	4.89117e-62	1.23893e-58	20042	Rps12
GO:0006412	translation	23.9129	4.89117e-62	1.23893e-58	20055	Rps16
GO:0006412	translation	23.9129	4.89117e-62	1.23893e-58	20068	Rps17
GO:0006412	translation	23.9129	4.89117e-62	1.23893e-58	20084	Rps18
GO:0006412	translation	23.9129	4.89117e-62	1.23893e-58	20085	Rps19
GO:0006412	translation	23.9129	4.89117e-62	1.23893e-58	20090	Rps29
GO:0006412	translation	23.9129	4.89117e-62	1.23893e-58	20091	Rps3a1
GO:0006412	translation	23.9129	4.89117e-62	1.23893e-58	20116	Rps8
GO:0006412	translation	23.9129	4.89117e-62	1.23893e-58	20918	Eif1
GO:0006412	translation	23.9129	4.89117e-62	1.23893e-58	22121	Rpl13a
GO:0006412	translation	23.9129	4.89117e-62	1.23893e-58	76846	Rps9
GO:0006412	translation	23.9129	4.89117e-62	1.23893e-58	78294	Rps27a
GO:0006412	translation	23.9129	4.89117e-62	1.23893e-58	78523	Mrpl9
GO:0006412	translation	23.9129	4.89117e-62	1.23893e-58	107045	Lars
GO:0006412	translation	23.9129	4.89117e-62	1.23893e-58	67025	Rpl11
GO:0006412	translation	23.9129	4.89117e-62	1.23893e-58	67115	Rpl14
GO:0006412	translation	23.9129	4.89117e-62	1.23893e-58	67248	Rpl39
GO:0006412	translation	23.9129	4.89117e-62	1.23893e-58	67281	Rpl37
GO:0006412	translation	23.9129	4.89117e-62	1.23893e-58	68052	Rps13
GO:0006412	translation	23.9129	4.89117e-62	1.23893e-58	68135	Eif3h
GO:0006412	translation	23.9129	4.89117e-62	1.23893e-58	68735	Mrps18c
GO:0006412	translation	23.9129	4.89117e-62	1.23893e-58	68836	Mrpl52
GO:0006412	translation	23.9129	4.89117e-62	1.23893e-58	69684	Aarsd1
GO:0006412	translation	23.9129	4.89117e-62	1.23893e-58	110954	Rpl10
GO:0006412	translation	23.9129	4.89117e-62	1.23893e-58	114641	Rpl31
GO:0006412	translation	23.9129	4.89117e-62	1.23893e-58	268449	Rpl23a
GO:0006412	translation	23.9129	4.89117e-62	1.23893e-58	269261	Rpl12
GO:0006412	translation	23.9129	4.89117e-62	1.23893e-58	270106	Rpl13
GO:0006412	translation	23.9129	4.89117e-62	1.23893e-58	100038991	Gm2000
GO:0002181	cytoplasmic translation	45.8571	2.71839e-25	3.44284e-22	19946	Rpl30
GO:0002181	cytoplasmic translation	45.8571	2.71839e-25	3.44284e-22	19988	Rpl6
GO:0002181	cytoplasmic translation	45.8571	2.71839e-25	3.44284e-22	100042823	Rpl9-ps6
GO:0002181	cytoplasmic translation	45.8571	2.71839e-25	3.44284e-22	114641	Rpl31
GO:0002181	cytoplasmic translation	45.8571	2.71839e-25	3.44284e-22	66480	Rpl15
GO:0002181	cytoplasmic translation	45.8571	2.71839e-25	3.44284e-22	66481	Rps21
GO:0002181	cytoplasmic translation	45.8571	2.71839e-25	3.44284e-22	67025	Rpl11
GO:0002181	cytoplasmic translation	45.8571	2.71839e-25	3.44284e-22	67248	Rpl39
GO:0002181	cytoplasmic translation	45.8571	2.71839e-25	3.44284e-22	19944	Rpl29
GO:0002181	cytoplasmic translation	45.8571	2.71839e-25	3.44284e-22	26961	Rpl8
GO:0002181	cytoplasmic translation	45.8571	2.71839e-25	3.44284e-22	54127	Rps28
GO:0002181	cytoplasmic translation	45.8571	2.71839e-25	3.44284e-22	20005	Rpl9
GO:0002181	cytoplasmic translation	45.8571	2.71839e-25	3.44284e-22	20090	Rps29
GO:0002181	cytoplasmic translation	45.8571	2.71839e-25	3.44284e-22	66475	Rps23
GO:0002181	cytoplasmic translation	45.8571	2.71839e-25	3.44284e-22	54217	Rpl36
GO:0002181	cytoplasmic translation	45.8571	2.71839e-25	3.44284e-22	57808	Rpl35a
GO:0002181	cytoplasmic translation	45.8571	2.71839e-25	3.44284e-22	19921	Rpl19
GO:0002181	cytoplasmic translation	45.8571	2.71839e-25	3.44284e-22	19934	Rpl22
GO:0000122	negative regulation of transcription by RNA polymerase II	5.54279	6.42311e-20	5.42325e-17	17381	Mmp12
GO:0000122	negative regulation of transcription by RNA polymerase II	5.54279	6.42311e-20	5.42325e-17	17135	Mafk
GO:0000122	negative regulation of transcription by RNA polymerase II	5.54279	6.42311e-20	5.42325e-17	20681	Sox8
GO:0000122	negative regulation of transcription by RNA polymerase II	5.54279	6.42311e-20	5.42325e-17	17089	Lyar
GO:0000122	negative regulation of transcription by RNA polymerase II	5.54279	6.42311e-20	5.42325e-17	23872	Ets2
GO:0000122	negative regulation of transcription by RNA polymerase II	5.54279	6.42311e-20	5.42325e-17	52609	Cbx7
GO:0000122	negative regulation of transcription by RNA polymerase II	5.54279	6.42311e-20	5.42325e-17	17691	Sik1
GO:0000122	negative regulation of transcription by RNA polymerase II	5.54279	6.42311e-20	5.42325e-17	18030	Nfil3
GO:0000122	negative regulation of transcription by RNA polymerase II	5.54279	6.42311e-20	5.42325e-17	18124	Nr4a3
GO:0000122	negative regulation of transcription by RNA polymerase II	5.54279	6.42311e-20	5.42325e-17	18227	Nr4a2
GO:0000122	negative regulation of transcription by RNA polymerase II	5.54279	6.42311e-20	5.42325e-17	18508	Pax6
GO:0000122	negative regulation of transcription by RNA polymerase II	5.54279	6.42311e-20	5.42325e-17	18626	Per1
GO:0000122	negative regulation of transcription by RNA polymerase II	5.54279	6.42311e-20	5.42325e-17	20613	Snai1
GO:0000122	negative regulation of transcription by RNA polymerase II	5.54279	6.42311e-20	5.42325e-17	69890	Zfp219
GO:0000122	negative regulation of transcription by RNA polymerase II	5.54279	6.42311e-20	5.42325e-17	20893	Bhlhe40
GO:0000122	negative regulation of transcription by RNA polymerase II	5.54279	6.42311e-20	5.42325e-17	21815	Tgif1
GO:0000122	negative regulation of transcription by RNA polymerase II	5.54279	6.42311e-20	5.42325e-17	22658	Pcgf2
GO:0000122	negative regulation of transcription by RNA polymerase II	5.54279	6.42311e-20	5.42325e-17	16600	Klf4
GO:0000122	negative regulation of transcription by RNA polymerase II	5.54279	6.42311e-20	5.42325e-17	11785	Apbb1
GO:0000122	negative regulation of transcription by RNA polymerase II	5.54279	6.42311e-20	5.42325e-17	11910	Atf3
GO:0000122	negative regulation of transcription by RNA polymerase II	5.54279	6.42311e-20	5.42325e-17	58805	Mlxipl
GO:0000122	negative regulation of transcription by RNA polymerase II	5.54279	6.42311e-20	5.42325e-17	59091	Jph2
GO:0000122	negative regulation of transcription by RNA polymerase II	5.54279	6.42311e-20	5.42325e-17	64707	Suv39h2
GO:0000122	negative regulation of transcription by RNA polymerase II	5.54279	6.42311e-20	5.42325e-17	65019	Rpl23
GO:0000122	negative regulation of transcription by RNA polymerase II	5.54279	6.42311e-20	5.42325e-17	67956	Kmt5a
GO:0000122	negative regulation of transcription by RNA polymerase II	5.54279	6.42311e-20	5.42325e-17	68077	Nop53
GO:0000122	negative regulation of transcription by RNA polymerase II	5.54279	6.42311e-20	5.42325e-17	14815	Nr3c1
GO:0000122	negative regulation of transcription by RNA polymerase II	5.54279	6.42311e-20	5.42325e-17	14958	H1f0
GO:0000122	negative regulation of transcription by RNA polymerase II	5.54279	6.42311e-20	5.42325e-17	15902	Id2
GO:0000122	negative regulation of transcription by RNA polymerase II	5.54279	6.42311e-20	5.42325e-17	16176	Il1b
GO:0000122	negative regulation of transcription by RNA polymerase II	5.54279	6.42311e-20	5.42325e-17	114565	Zbtb21
GO:0000122	negative regulation of transcription by RNA polymerase II	5.54279	6.42311e-20	5.42325e-17	12608	Cebpb
GO:0000122	negative regulation of transcription by RNA polymerase II	5.54279	6.42311e-20	5.42325e-17	192231	Hexim1
GO:0000122	negative regulation of transcription by RNA polymerase II	5.54279	6.42311e-20	5.42325e-17	12261	C1qbp
GO:0000122	negative regulation of transcription by RNA polymerase II	5.54279	6.42311e-20	5.42325e-17	12592	Cdx4
GO:0000122	negative regulation of transcription by RNA polymerase II	5.54279	6.42311e-20	5.42325e-17	13653	Egr1
GO:0000122	negative regulation of transcription by RNA polymerase II	5.54279	6.42311e-20	5.42325e-17	13197	Gadd45a
GO:0000122	negative regulation of transcription by RNA polymerase II	5.54279	6.42311e-20	5.42325e-17	13198	Ddit3
GO:0000122	negative regulation of transcription by RNA polymerase II	5.54279	6.42311e-20	5.42325e-17	13614	Edn1
GO:0000122	negative regulation of transcription by RNA polymerase II	5.54279	6.42311e-20	5.42325e-17	230796	Wdtc1
GO:0000122	negative regulation of transcription by RNA polymerase II	5.54279	6.42311e-20	5.42325e-17	277353	Tcfl5
GO:0000122	negative regulation of transcription by RNA polymerase II	5.54279	6.42311e-20	5.42325e-17	73754	Thap1
GO:0000122	negative regulation of transcription by RNA polymerase II	5.54279	6.42311e-20	5.42325e-17	110954	Rpl10
GO:0000122	negative regulation of transcription by RNA polymerase II	5.54279	6.42311e-20	5.42325e-17	626802	Gm14322
GO:0000122	negative regulation of transcription by RNA polymerase II	5.54279	6.42311e-20	5.42325e-17	194655	Klf11
GO:0000122	negative regulation of transcription by RNA polymerase II	5.54279	6.42311e-20	5.42325e-17	100009600	Zglp1
GO:0045892	negative regulation of transcription, DNA-templated	6.13124	7.97973e-15	4.14922e-12	21847	Klf10
GO:0045892	negative regulation of transcription, DNA-templated	6.13124	7.97973e-15	4.14922e-12	114565	Zbtb21
GO:0045892	negative regulation of transcription, DNA-templated	6.13124	7.97973e-15	4.14922e-12	20893	Bhlhe40
GO:0045892	negative regulation of transcription, DNA-templated	6.13124	7.97973e-15	4.14922e-12	229599	Ciart
GO:0045892	negative regulation of transcription, DNA-templated	6.13124	7.97973e-15	4.14922e-12	56612	Pfdn5
GO:0045892	negative regulation of transcription, DNA-templated	6.13124	7.97973e-15	4.14922e-12	69890	Zfp219
GO:0045892	negative regulation of transcription, DNA-templated	6.13124	7.97973e-15	4.14922e-12	104383	Rcor2
GO:0045892	negative regulation of transcription, DNA-templated	6.13124	7.97973e-15	4.14922e-12	14815	Nr3c1
GO:0045892	negative regulation of transcription, DNA-templated	6.13124	7.97973e-15	4.14922e-12	170930	Sumo2
GO:0045892	negative regulation of transcription, DNA-templated	6.13124	7.97973e-15	4.14922e-12	192231	Hexim1
GO:0045892	negative regulation of transcription, DNA-templated	6.13124	7.97973e-15	4.14922e-12	194655	Klf11
GO:0045892	negative regulation of transcription, DNA-templated	6.13124	7.97973e-15	4.14922e-12	20681	Sox8
GO:0045892	negative regulation of transcription, DNA-templated	6.13124	7.97973e-15	4.14922e-12	240514	Ccdc85b
GO:0045892	negative regulation of transcription, DNA-templated	6.13124	7.97973e-15	4.14922e-12	58805	Mlxipl
GO:0045892	negative regulation of transcription, DNA-templated	6.13124	7.97973e-15	4.14922e-12	59091	Jph2
GO:0045892	negative regulation of transcription, DNA-templated	6.13124	7.97973e-15	4.14922e-12	64707	Suv39h2
GO:0045892	negative regulation of transcription, DNA-templated	6.13124	7.97973e-15	4.14922e-12	67773	Kat8
GO:0045892	negative regulation of transcription, DNA-templated	6.13124	7.97973e-15	4.14922e-12	67956	Kmt5a
GO:0045892	negative regulation of transcription, DNA-templated	6.13124	7.97973e-15	4.14922e-12	12569	Cdk5r1
GO:0045892	negative regulation of transcription, DNA-templated	6.13124	7.97973e-15	4.14922e-12	12608	Cebpb
GO:0045892	negative regulation of transcription, DNA-templated	6.13124	7.97973e-15	4.14922e-12	13198	Ddit3
GO:0045892	negative regulation of transcription, DNA-templated	6.13124	7.97973e-15	4.14922e-12	15902	Id2
GO:0045892	negative regulation of transcription, DNA-templated	6.13124	7.97973e-15	4.14922e-12	16600	Klf4
GO:0045892	negative regulation of transcription, DNA-templated	6.13124	7.97973e-15	4.14922e-12	16963	Xcl1
GO:0045892	negative regulation of transcription, DNA-templated	6.13124	7.97973e-15	4.14922e-12	18030	Nfil3
GO:0045892	negative regulation of transcription, DNA-templated	6.13124	7.97973e-15	4.14922e-12	20613	Snai1
GO:0045892	negative regulation of transcription, DNA-templated	6.13124	7.97973e-15	4.14922e-12	19763	Ring1
GO:0045892	negative regulation of transcription, DNA-templated	6.13124	7.97973e-15	4.14922e-12	11910	Atf3
GO:0045892	negative regulation of transcription, DNA-templated	6.13124	7.97973e-15	4.14922e-12	240672	Dusp5
GO:0045892	negative regulation of transcription, DNA-templated	6.13124	7.97973e-15	4.14922e-12	18626	Per1
GO:0045892	negative regulation of transcription, DNA-templated	6.13124	7.97973e-15	4.14922e-12	19416	Rasd1
GO:0045944	positive regulation of transcription by RNA polymerase II	4.15086	8.19034e-15	4.14922e-12	18508	Pax6
GO:0045944	positive regulation of transcription by RNA polymerase II	4.15086	8.19034e-15	4.14922e-12	21847	Klf10
GO:0045944	positive regulation of transcription by RNA polymerase II	4.15086	8.19034e-15	4.14922e-12	23872	Ets2
GO:0045944	positive regulation of transcription by RNA polymerase II	4.15086	8.19034e-15	4.14922e-12	20681	Sox8
GO:0045944	positive regulation of transcription by RNA polymerase II	4.15086	8.19034e-15	4.14922e-12	18227	Nr4a2
GO:0045944	positive regulation of transcription by RNA polymerase II	4.15086	8.19034e-15	4.14922e-12	55942	Sertad1
GO:0045944	positive regulation of transcription by RNA polymerase II	4.15086	8.19034e-15	4.14922e-12	58805	Mlxipl
GO:0045944	positive regulation of transcription by RNA polymerase II	4.15086	8.19034e-15	4.14922e-12	28106	Mydgf
GO:0045944	positive regulation of transcription by RNA polymerase II	4.15086	8.19034e-15	4.14922e-12	51812	Mcrs1
GO:0045944	positive regulation of transcription by RNA polymerase II	4.15086	8.19034e-15	4.14922e-12	69890	Zfp219
GO:0045944	positive regulation of transcription by RNA polymerase II	4.15086	8.19034e-15	4.14922e-12	76900	Ssbp4
GO:0045944	positive regulation of transcription by RNA polymerase II	4.15086	8.19034e-15	4.14922e-12	18626	Per1
GO:0045944	positive regulation of transcription by RNA polymerase II	4.15086	8.19034e-15	4.14922e-12	80707	Wwox
GO:0045944	positive regulation of transcription by RNA polymerase II	4.15086	8.19034e-15	4.14922e-12	20899	Stra8
GO:0045944	positive regulation of transcription by RNA polymerase II	4.15086	8.19034e-15	4.14922e-12	216799	Nlrp3
GO:0045944	positive regulation of transcription by RNA polymerase II	4.15086	8.19034e-15	4.14922e-12	223227	Sox21
GO:0045944	positive regulation of transcription by RNA polymerase II	4.15086	8.19034e-15	4.14922e-12	16477	Junb
GO:0045944	positive regulation of transcription by RNA polymerase II	4.15086	8.19034e-15	4.14922e-12	11785	Apbb1
GO:0045944	positive regulation of transcription by RNA polymerase II	4.15086	8.19034e-15	4.14922e-12	100009600	Zglp1
GO:0045944	positive regulation of transcription by RNA polymerase II	4.15086	8.19034e-15	4.14922e-12	12592	Cdx4
GO:0045944	positive regulation of transcription by RNA polymerase II	4.15086	8.19034e-15	4.14922e-12	67773	Kat8
GO:0045944	positive regulation of transcription by RNA polymerase II	4.15086	8.19034e-15	4.14922e-12	68047	Mpnd
GO:0045944	positive regulation of transcription by RNA polymerase II	4.15086	8.19034e-15	4.14922e-12	18124	Nr4a3
GO:0045944	positive regulation of transcription by RNA polymerase II	4.15086	8.19034e-15	4.14922e-12	13614	Edn1
GO:0045944	positive regulation of transcription by RNA polymerase II	4.15086	8.19034e-15	4.14922e-12	13653	Egr1
GO:0045944	positive regulation of transcription by RNA polymerase II	4.15086	8.19034e-15	4.14922e-12	78284	Creb3l4
GO:0045944	positive regulation of transcription by RNA polymerase II	4.15086	8.19034e-15	4.14922e-12	170930	Sumo2
GO:0045944	positive regulation of transcription by RNA polymerase II	4.15086	8.19034e-15	4.14922e-12	15370	Nr4a1
GO:0045944	positive regulation of transcription by RNA polymerase II	4.15086	8.19034e-15	4.14922e-12	15939	Ier5
GO:0045944	positive regulation of transcription by RNA polymerase II	4.15086	8.19034e-15	4.14922e-12	16147	Ihh
GO:0045944	positive regulation of transcription by RNA polymerase II	4.15086	8.19034e-15	4.14922e-12	16478	Jund
GO:0045944	positive regulation of transcription by RNA polymerase II	4.15086	8.19034e-15	4.14922e-12	16600	Klf4
GO:0045944	positive regulation of transcription by RNA polymerase II	4.15086	8.19034e-15	4.14922e-12	17133	Maff
GO:0045944	positive regulation of transcription by RNA polymerase II	4.15086	8.19034e-15	4.14922e-12	17381	Mmp12
GO:0045944	positive regulation of transcription by RNA polymerase II	4.15086	8.19034e-15	4.14922e-12	18035	Nfkbia
GO:0045944	positive regulation of transcription by RNA polymerase II	4.15086	8.19034e-15	4.14922e-12	18103	Nme2
GO:0045944	positive regulation of transcription by RNA polymerase II	4.15086	8.19034e-15	4.14922e-12	14281	Fos
GO:0045944	positive regulation of transcription by RNA polymerase II	4.15086	8.19034e-15	4.14922e-12	14284	Fosl2
GO:0045944	positive regulation of transcription by RNA polymerase II	4.15086	8.19034e-15	4.14922e-12	13654	Egr2
GO:0045944	positive regulation of transcription by RNA polymerase II	4.15086	8.19034e-15	4.14922e-12	16153	Il10
GO:0045944	positive regulation of transcription by RNA polymerase II	4.15086	8.19034e-15	4.14922e-12	16176	Il1b
GO:0045944	positive regulation of transcription by RNA polymerase II	4.15086	8.19034e-15	4.14922e-12	11910	Atf3
GO:0045944	positive regulation of transcription by RNA polymerase II	4.15086	8.19034e-15	4.14922e-12	14815	Nr3c1
GO:0045944	positive regulation of transcription by RNA polymerase II	4.15086	8.19034e-15	4.14922e-12	12608	Cebpb
GO:0045944	positive regulation of transcription by RNA polymerase II	4.15086	8.19034e-15	4.14922e-12	13198	Ddit3
GO:0045893	positive regulation of transcription, DNA-templated	5.5315	4.88406e-14	2.06189e-11	23872	Ets2
GO:0045893	positive regulation of transcription, DNA-templated	5.5315	4.88406e-14	2.06189e-11	14281	Fos
GO:0045893	positive regulation of transcription, DNA-templated	5.5315	4.88406e-14	2.06189e-11	56282	Mrpl12
GO:0045893	positive regulation of transcription, DNA-templated	5.5315	4.88406e-14	2.06189e-11	20681	Sox8
GO:0045893	positive regulation of transcription, DNA-templated	5.5315	4.88406e-14	2.06189e-11	20613	Snai1
GO:0045893	positive regulation of transcription, DNA-templated	5.5315	4.88406e-14	2.06189e-11	14284	Fosl2
GO:0045893	positive regulation of transcription, DNA-templated	5.5315	4.88406e-14	2.06189e-11	55942	Sertad1
GO:0045893	positive regulation of transcription, DNA-templated	5.5315	4.88406e-14	2.06189e-11	11785	Apbb1
GO:0045893	positive regulation of transcription, DNA-templated	5.5315	4.88406e-14	2.06189e-11	58805	Mlxipl
GO:0045893	positive regulation of transcription, DNA-templated	5.5315	4.88406e-14	2.06189e-11	64654	Fgf23
GO:0045893	positive regulation of transcription, DNA-templated	5.5315	4.88406e-14	2.06189e-11	66193	Pithd1
GO:0045893	positive regulation of transcription, DNA-templated	5.5315	4.88406e-14	2.06189e-11	67773	Kat8
GO:0045893	positive regulation of transcription, DNA-templated	5.5315	4.88406e-14	2.06189e-11	68010	Bambi
GO:0045893	positive regulation of transcription, DNA-templated	5.5315	4.88406e-14	2.06189e-11	216154	Med16
GO:0045893	positive regulation of transcription, DNA-templated	5.5315	4.88406e-14	2.06189e-11	18124	Nr4a3
GO:0045893	positive regulation of transcription, DNA-templated	5.5315	4.88406e-14	2.06189e-11	18227	Nr4a2
GO:0045893	positive regulation of transcription, DNA-templated	5.5315	4.88406e-14	2.06189e-11	18508	Pax6
GO:0045893	positive regulation of transcription, DNA-templated	5.5315	4.88406e-14	2.06189e-11	18712	Pim1
GO:0045893	positive regulation of transcription, DNA-templated	5.5315	4.88406e-14	2.06189e-11	12608	Cebpb
GO:0045893	positive regulation of transcription, DNA-templated	5.5315	4.88406e-14	2.06189e-11	15370	Nr4a1
GO:0045893	positive regulation of transcription, DNA-templated	5.5315	4.88406e-14	2.06189e-11	15902	Id2
GO:0045893	positive regulation of transcription, DNA-templated	5.5315	4.88406e-14	2.06189e-11	12154	Bmp10
GO:0045893	positive regulation of transcription, DNA-templated	5.5315	4.88406e-14	2.06189e-11	18103	Nme2
GO:0045893	positive regulation of transcription, DNA-templated	5.5315	4.88406e-14	2.06189e-11	13198	Ddit3
GO:0045893	positive regulation of transcription, DNA-templated	5.5315	4.88406e-14	2.06189e-11	17242	Mdk
GO:0045893	positive regulation of transcription, DNA-templated	5.5315	4.88406e-14	2.06189e-11	13653	Egr1
GO:0045893	positive regulation of transcription, DNA-templated	5.5315	4.88406e-14	2.06189e-11	18030	Nfil3
GO:0045893	positive regulation of transcription, DNA-templated	5.5315	4.88406e-14	2.06189e-11	13654	Egr2
GO:0045893	positive regulation of transcription, DNA-templated	5.5315	4.88406e-14	2.06189e-11	16176	Il1b
GO:0045893	positive regulation of transcription, DNA-templated	5.5315	4.88406e-14	2.06189e-11	16600	Klf4
GO:0045893	positive regulation of transcription, DNA-templated	5.5315	4.88406e-14	2.06189e-11	16153	Il10
GO:0045893	positive regulation of transcription, DNA-templated	5.5315	4.88406e-14	2.06189e-11	18035	Nfkbia
GO:0030154	cell differentiation	4.31452	8.89896e-14	3.22015e-11	69890	Zfp219
GO:0030154	cell differentiation	4.31452	8.89896e-14	3.22015e-11	64654	Fgf23
GO:0030154	cell differentiation	4.31452	8.89896e-14	3.22015e-11	64707	Suv39h2
GO:0030154	cell differentiation	4.31452	8.89896e-14	3.22015e-11	66912	Bzw2
GO:0030154	cell differentiation	4.31452	8.89896e-14	3.22015e-11	19716	Bex1
GO:0030154	cell differentiation	4.31452	8.89896e-14	3.22015e-11	20091	Rps3a1
GO:0030154	cell differentiation	4.31452	8.89896e-14	3.22015e-11	20811	Srms
GO:0030154	cell differentiation	4.31452	8.89896e-14	3.22015e-11	18508	Pax6
GO:0030154	cell differentiation	4.31452	8.89896e-14	3.22015e-11	59022	Edf1
GO:0030154	cell differentiation	4.31452	8.89896e-14	3.22015e-11	54156	Egfl6
GO:0030154	cell differentiation	4.31452	8.89896e-14	3.22015e-11	240514	Ccdc85b
GO:0030154	cell differentiation	4.31452	8.89896e-14	3.22015e-11	328845	Acsbg2
GO:0030154	cell differentiation	4.31452	8.89896e-14	3.22015e-11	18102	Nme1
GO:0030154	cell differentiation	4.31452	8.89896e-14	3.22015e-11	382018	Unc13a
GO:0030154	cell differentiation	4.31452	8.89896e-14	3.22015e-11	71242	Spata24
GO:0030154	cell differentiation	4.31452	8.89896e-14	3.22015e-11	71660	Rarres2
GO:0030154	cell differentiation	4.31452	8.89896e-14	3.22015e-11	20899	Stra8
GO:0030154	cell differentiation	4.31452	8.89896e-14	3.22015e-11	22340	Vegfb
GO:0030154	cell differentiation	4.31452	8.89896e-14	3.22015e-11	22687	Zpr1
GO:0030154	cell differentiation	4.31452	8.89896e-14	3.22015e-11	23872	Ets2
GO:0030154	cell differentiation	4.31452	8.89896e-14	3.22015e-11	23882	Gadd45g
GO:0030154	cell differentiation	4.31452	8.89896e-14	3.22015e-11	27103	Eif2ak4
GO:0030154	cell differentiation	4.31452	8.89896e-14	3.22015e-11	223227	Sox21
GO:0030154	cell differentiation	4.31452	8.89896e-14	3.22015e-11	17242	Mdk
GO:0030154	cell differentiation	4.31452	8.89896e-14	3.22015e-11	17691	Sik1
GO:0030154	cell differentiation	4.31452	8.89896e-14	3.22015e-11	17873	Gadd45b
GO:0030154	cell differentiation	4.31452	8.89896e-14	3.22015e-11	72504	Taf4b
GO:0030154	cell differentiation	4.31452	8.89896e-14	3.22015e-11	100009600	Zglp1
GO:0030154	cell differentiation	4.31452	8.89896e-14	3.22015e-11	12592	Cdx4
GO:0030154	cell differentiation	4.31452	8.89896e-14	3.22015e-11	71839	Osgin1
GO:0030154	cell differentiation	4.31452	8.89896e-14	3.22015e-11	16147	Ihh
GO:0030154	cell differentiation	4.31452	8.89896e-14	3.22015e-11	78284	Creb3l4
GO:0030154	cell differentiation	4.31452	8.89896e-14	3.22015e-11	14171	Fgf17
GO:0030154	cell differentiation	4.31452	8.89896e-14	3.22015e-11	15512	Hspa2
GO:0030154	cell differentiation	4.31452	8.89896e-14	3.22015e-11	16600	Klf4
GO:0030154	cell differentiation	4.31452	8.89896e-14	3.22015e-11	12661	Chl1
GO:0030154	cell differentiation	4.31452	8.89896e-14	3.22015e-11	12890	Cplx2
GO:0030154	cell differentiation	4.31452	8.89896e-14	3.22015e-11	12608	Cebpb
GO:0030154	cell differentiation	4.31452	8.89896e-14	3.22015e-11	107221	Ffar4
GO:0030154	cell differentiation	4.31452	8.89896e-14	3.22015e-11	15902	Id2
GO:0006364	rRNA processing	12.9929	1.11768e-13	3.53886e-11	67025	Rpl11
GO:0006364	rRNA processing	12.9929	1.11768e-13	3.53886e-11	57808	Rpl35a
GO:0006364	rRNA processing	12.9929	1.11768e-13	3.53886e-11	54127	Rps28
GO:0006364	rRNA processing	12.9929	1.11768e-13	3.53886e-11	68077	Nop53
GO:0006364	rRNA processing	12.9929	1.11768e-13	3.53886e-11	20085	Rps19
GO:0006364	rRNA processing	12.9929	1.11768e-13	3.53886e-11	67223	Rrp15
GO:0006364	rRNA processing	12.9929	1.11768e-13	3.53886e-11	217109	Utp18
GO:0006364	rRNA processing	12.9929	1.11768e-13	3.53886e-11	66161	Pop4
GO:0006364	rRNA processing	12.9929	1.11768e-13	3.53886e-11	67115	Rpl14
GO:0006364	rRNA processing	12.9929	1.11768e-13	3.53886e-11	20055	Rps16
GO:0006364	rRNA processing	12.9929	1.11768e-13	3.53886e-11	75617	Rps25
GO:0006364	rRNA processing	12.9929	1.11768e-13	3.53886e-11	64934	Pes1
GO:0006364	rRNA processing	12.9929	1.11768e-13	3.53886e-11	74097	Pop7
GO:0006364	rRNA processing	12.9929	1.11768e-13	3.53886e-11	19989	Rpl7
GO:0006364	rRNA processing	12.9929	1.11768e-13	3.53886e-11	68147	Gar1
GO:0006364	rRNA processing	12.9929	1.11768e-13	3.53886e-11	20068	Rps17
GO:0006364	rRNA processing	12.9929	1.11768e-13	3.53886e-11	17089	Lyar
GO:0008380	RNA splicing	8.57634	4.58418e-13	1.29019e-10	78372	Snrnp25
GO:0008380	RNA splicing	8.57634	4.58418e-13	1.29019e-10	233908	Fus
GO:0008380	RNA splicing	8.57634	4.58418e-13	1.29019e-10	76938	Rbm17
GO:0008380	RNA splicing	8.57634	4.58418e-13	1.29019e-10	66070	Cwc15
GO:0008380	RNA splicing	8.57634	4.58418e-13	1.29019e-10	20641	Snrpd1
GO:0008380	RNA splicing	8.57634	4.58418e-13	1.29019e-10	20643	Snrpe
GO:0008380	RNA splicing	8.57634	4.58418e-13	1.29019e-10	20227	Sart1
GO:0008380	RNA splicing	8.57634	4.58418e-13	1.29019e-10	21681	Alyref
GO:0008380	RNA splicing	8.57634	4.58418e-13	1.29019e-10	107686	Snrpd2
GO:0008380	RNA splicing	8.57634	4.58418e-13	1.29019e-10	69878	Snrpf
GO:0008380	RNA splicing	8.57634	4.58418e-13	1.29019e-10	60365	Rbm8a
GO:0008380	RNA splicing	8.57634	4.58418e-13	1.29019e-10	17149	Magoh
GO:0008380	RNA splicing	8.57634	4.58418e-13	1.29019e-10	22687	Zpr1
GO:0008380	RNA splicing	8.57634	4.58418e-13	1.29019e-10	20384	Srsf5
GO:0008380	RNA splicing	8.57634	4.58418e-13	1.29019e-10	68981	Snrpa1
GO:0008380	RNA splicing	8.57634	4.58418e-13	1.29019e-10	66373	Lsm5
GO:0008380	RNA splicing	8.57634	4.58418e-13	1.29019e-10	50783	Lsm4
GO:0008380	RNA splicing	8.57634	4.58418e-13	1.29019e-10	15382	Hnrnpa1
GO:0008380	RNA splicing	8.57634	4.58418e-13	1.29019e-10	12261	C1qbp
GO:0008380	RNA splicing	8.57634	4.58418e-13	1.29019e-10	68592	Syf2
GO:0008380	RNA splicing	8.57634	4.58418e-13	1.29019e-10	66094	Lsm7
GO:0000398	mRNA splicing, via spliceosome	11.6603	6.82489e-13	1.72874e-10	20227	Sart1
GO:0000398	mRNA splicing, via spliceosome	11.6603	6.82489e-13	1.72874e-10	68592	Syf2
GO:0000398	mRNA splicing, via spliceosome	11.6603	6.82489e-13	1.72874e-10	66070	Cwc15
GO:0000398	mRNA splicing, via spliceosome	11.6603	6.82489e-13	1.72874e-10	78372	Snrnp25
GO:0000398	mRNA splicing, via spliceosome	11.6603	6.82489e-13	1.72874e-10	20384	Srsf5
GO:0000398	mRNA splicing, via spliceosome	11.6603	6.82489e-13	1.72874e-10	107686	Snrpd2
GO:0000398	mRNA splicing, via spliceosome	11.6603	6.82489e-13	1.72874e-10	66381	Rnf113a2
GO:0000398	mRNA splicing, via spliceosome	11.6603	6.82489e-13	1.72874e-10	69878	Snrpf
GO:0000398	mRNA splicing, via spliceosome	11.6603	6.82489e-13	1.72874e-10	66094	Lsm7
GO:0000398	mRNA splicing, via spliceosome	11.6603	6.82489e-13	1.72874e-10	66373	Lsm5
GO:0000398	mRNA splicing, via spliceosome	11.6603	6.82489e-13	1.72874e-10	76938	Rbm17
GO:0000398	mRNA splicing, via spliceosome	11.6603	6.82489e-13	1.72874e-10	60365	Rbm8a
GO:0000398	mRNA splicing, via spliceosome	11.6603	6.82489e-13	1.72874e-10	50783	Lsm4
GO:0000398	mRNA splicing, via spliceosome	11.6603	6.82489e-13	1.72874e-10	72459	Htatsf1
GO:0000398	mRNA splicing, via spliceosome	11.6603	6.82489e-13	1.72874e-10	68981	Snrpa1
GO:0000398	mRNA splicing, via spliceosome	11.6603	6.82489e-13	1.72874e-10	20643	Snrpe
GO:0000398	mRNA splicing, via spliceosome	11.6603	6.82489e-13	1.72874e-10	20641	Snrpd1
GO:0007049	cell cycle	5.16908	1.86374e-12	4.29169e-10	223775	Pim3
GO:0007049	cell cycle	5.16908	1.86374e-12	4.29169e-10	27050	Rps3
GO:0007049	cell cycle	5.16908	1.86374e-12	4.29169e-10	218630	Ccno
GO:0007049	cell cycle	5.16908	1.86374e-12	4.29169e-10	17420	Mnat1
GO:0007049	cell cycle	5.16908	1.86374e-12	4.29169e-10	71878	Fam83d
GO:0007049	cell cycle	5.16908	1.86374e-12	4.29169e-10	18712	Pim1
GO:0007049	cell cycle	5.16908	1.86374e-12	4.29169e-10	67956	Kmt5a
GO:0007049	cell cycle	5.16908	1.86374e-12	4.29169e-10	110749	Chaf1b
GO:0007049	cell cycle	5.16908	1.86374e-12	4.29169e-10	17691	Sik1
GO:0007049	cell cycle	5.16908	1.86374e-12	4.29169e-10	67733	Itgb3bp
GO:0007049	cell cycle	5.16908	1.86374e-12	4.29169e-10	14694	Rack1
GO:0007049	cell cycle	5.16908	1.86374e-12	4.29169e-10	19252	Dusp1
GO:0007049	cell cycle	5.16908	1.86374e-12	4.29169e-10	23922	Jtb
GO:0007049	cell cycle	5.16908	1.86374e-12	4.29169e-10	71909	Haus5
GO:0007049	cell cycle	5.16908	1.86374e-12	4.29169e-10	66296	Haus2
GO:0007049	cell cycle	5.16908	1.86374e-12	4.29169e-10	22367	Vrk1
GO:0007049	cell cycle	5.16908	1.86374e-12	4.29169e-10	13197	Gadd45a
GO:0007049	cell cycle	5.16908	1.86374e-12	4.29169e-10	140557	Smc1b
GO:0007049	cell cycle	5.16908	1.86374e-12	4.29169e-10	13198	Ddit3
GO:0007049	cell cycle	5.16908	1.86374e-12	4.29169e-10	75430	Anapc15
GO:0007049	cell cycle	5.16908	1.86374e-12	4.29169e-10	64707	Suv39h2
GO:0007049	cell cycle	5.16908	1.86374e-12	4.29169e-10	20439	Siah2
GO:0007049	cell cycle	5.16908	1.86374e-12	4.29169e-10	50523	Lats2
GO:0007049	cell cycle	5.16908	1.86374e-12	4.29169e-10	54124	Cks1b
GO:0007049	cell cycle	5.16908	1.86374e-12	4.29169e-10	73754	Thap1
GO:0007049	cell cycle	5.16908	1.86374e-12	4.29169e-10	50927	Nasp
GO:0007049	cell cycle	5.16908	1.86374e-12	4.29169e-10	73738	Haus7
GO:0007049	cell cycle	5.16908	1.86374e-12	4.29169e-10	27103	Eif2ak4
GO:0007049	cell cycle	5.16908	1.86374e-12	4.29169e-10	63955	Cables1
GO:0007049	cell cycle	5.16908	1.86374e-12	4.29169e-10	28135	Cep63
GO:0043066	negative regulation of apoptotic process	5.43739	3.36733e-12	7.10788e-10	11798	Xiap
GO:0043066	negative regulation of apoptotic process	5.43739	3.36733e-12	7.10788e-10	13036	Ctsh
GO:0043066	negative regulation of apoptotic process	5.43739	3.36733e-12	7.10788e-10	16153	Il10
GO:0043066	negative regulation of apoptotic process	5.43739	3.36733e-12	7.10788e-10	16668	Krt18
GO:0043066	negative regulation of apoptotic process	5.43739	3.36733e-12	7.10788e-10	18712	Pim1
GO:0043066	negative regulation of apoptotic process	5.43739	3.36733e-12	7.10788e-10	12702	Socs3
GO:0043066	negative regulation of apoptotic process	5.43739	3.36733e-12	7.10788e-10	12411	Cbs
GO:0043066	negative regulation of apoptotic process	5.43739	3.36733e-12	7.10788e-10	20620	Plk2
GO:0043066	negative regulation of apoptotic process	5.43739	3.36733e-12	7.10788e-10	17420	Mnat1
GO:0043066	negative regulation of apoptotic process	5.43739	3.36733e-12	7.10788e-10	57875	Angptl4
GO:0043066	negative regulation of apoptotic process	5.43739	3.36733e-12	7.10788e-10	20655	Sod1
GO:0043066	negative regulation of apoptotic process	5.43739	3.36733e-12	7.10788e-10	16147	Ihh
GO:0043066	negative regulation of apoptotic process	5.43739	3.36733e-12	7.10788e-10	107221	Ffar4
GO:0043066	negative regulation of apoptotic process	5.43739	3.36733e-12	7.10788e-10	20439	Siah2
GO:0043066	negative regulation of apoptotic process	5.43739	3.36733e-12	7.10788e-10	14815	Nr3c1
GO:0043066	negative regulation of apoptotic process	5.43739	3.36733e-12	7.10788e-10	17314	Mgmt
GO:0043066	negative regulation of apoptotic process	5.43739	3.36733e-12	7.10788e-10	14828	Hspa5
GO:0043066	negative regulation of apoptotic process	5.43739	3.36733e-12	7.10788e-10	223775	Pim3
GO:0043066	negative regulation of apoptotic process	5.43739	3.36733e-12	7.10788e-10	18103	Nme2
GO:0043066	negative regulation of apoptotic process	5.43739	3.36733e-12	7.10788e-10	18124	Nr4a3
GO:0043066	negative regulation of apoptotic process	5.43739	3.36733e-12	7.10788e-10	18793	Plaur
GO:0043066	negative regulation of apoptotic process	5.43739	3.36733e-12	7.10788e-10	19225	Ptgs2
GO:0043066	negative regulation of apoptotic process	5.43739	3.36733e-12	7.10788e-10	110954	Rpl10
GO:0043066	negative regulation of apoptotic process	5.43739	3.36733e-12	7.10788e-10	28106	Mydgf
GO:0043066	negative regulation of apoptotic process	5.43739	3.36733e-12	7.10788e-10	19252	Dusp1
GO:0043066	negative regulation of apoptotic process	5.43739	3.36733e-12	7.10788e-10	20681	Sox8
GO:0043066	negative regulation of apoptotic process	5.43739	3.36733e-12	7.10788e-10	22340	Vegfb
GO:0043066	negative regulation of apoptotic process	5.43739	3.36733e-12	7.10788e-10	24064	Spry2
GO:0006355	regulation of transcription, DNA-templated	3.91831	3.71981e-12	7.24791e-10	20681	Sox8
GO:0006355	regulation of transcription, DNA-templated	3.91831	3.71981e-12	7.24791e-10	20613	Snai1
GO:0006355	regulation of transcription, DNA-templated	3.91831	3.71981e-12	7.24791e-10	20893	Bhlhe40
GO:0006355	regulation of transcription, DNA-templated	3.91831	3.71981e-12	7.24791e-10	21815	Tgif1
GO:0006355	regulation of transcription, DNA-templated	3.91831	3.71981e-12	7.24791e-10	18227	Nr4a2
GO:0006355	regulation of transcription, DNA-templated	3.91831	3.71981e-12	7.24791e-10	223227	Sox21
GO:0006355	regulation of transcription, DNA-templated	3.91831	3.71981e-12	7.24791e-10	18124	Nr4a3
GO:0006355	regulation of transcription, DNA-templated	3.91831	3.71981e-12	7.24791e-10	18508	Pax6
GO:0006355	regulation of transcription, DNA-templated	3.91831	3.71981e-12	7.24791e-10	56612	Pfdn5
GO:0006355	regulation of transcription, DNA-templated	3.91831	3.71981e-12	7.24791e-10	67733	Itgb3bp
GO:0006355	regulation of transcription, DNA-templated	3.91831	3.71981e-12	7.24791e-10	13654	Egr2
GO:0006355	regulation of transcription, DNA-templated	3.91831	3.71981e-12	7.24791e-10	18030	Nfil3
GO:0006355	regulation of transcription, DNA-templated	3.91831	3.71981e-12	7.24791e-10	16477	Junb
GO:0006355	regulation of transcription, DNA-templated	3.91831	3.71981e-12	7.24791e-10	72504	Taf4b
GO:0006355	regulation of transcription, DNA-templated	3.91831	3.71981e-12	7.24791e-10	17135	Mafk
GO:0006355	regulation of transcription, DNA-templated	3.91831	3.71981e-12	7.24791e-10	17420	Mnat1
GO:0006355	regulation of transcription, DNA-templated	3.91831	3.71981e-12	7.24791e-10	78284	Creb3l4
GO:0006355	regulation of transcription, DNA-templated	3.91831	3.71981e-12	7.24791e-10	13198	Ddit3
GO:0006355	regulation of transcription, DNA-templated	3.91831	3.71981e-12	7.24791e-10	13653	Egr1
GO:0006355	regulation of transcription, DNA-templated	3.91831	3.71981e-12	7.24791e-10	67773	Kat8
GO:0006355	regulation of transcription, DNA-templated	3.91831	3.71981e-12	7.24791e-10	242509	Bnc2
GO:0006355	regulation of transcription, DNA-templated	3.91831	3.71981e-12	7.24791e-10	15370	Nr4a1
GO:0006355	regulation of transcription, DNA-templated	3.91831	3.71981e-12	7.24791e-10	21847	Klf10
GO:0006355	regulation of transcription, DNA-templated	3.91831	3.71981e-12	7.24791e-10	17133	Maff
GO:0006355	regulation of transcription, DNA-templated	3.91831	3.71981e-12	7.24791e-10	69890	Zfp219
GO:0006355	regulation of transcription, DNA-templated	3.91831	3.71981e-12	7.24791e-10	12608	Cebpb
GO:0006355	regulation of transcription, DNA-templated	3.91831	3.71981e-12	7.24791e-10	16478	Jund
GO:0006355	regulation of transcription, DNA-templated	3.91831	3.71981e-12	7.24791e-10	277353	Tcfl5
GO:0006355	regulation of transcription, DNA-templated	3.91831	3.71981e-12	7.24791e-10	73754	Thap1
GO:0006355	regulation of transcription, DNA-templated	3.91831	3.71981e-12	7.24791e-10	54124	Cks1b
GO:0006355	regulation of transcription, DNA-templated	3.91831	3.71981e-12	7.24791e-10	11910	Atf3
GO:0006355	regulation of transcription, DNA-templated	3.91831	3.71981e-12	7.24791e-10	14815	Nr3c1
GO:0006355	regulation of transcription, DNA-templated	3.91831	3.71981e-12	7.24791e-10	23872	Ets2
GO:0006355	regulation of transcription, DNA-templated	3.91831	3.71981e-12	7.24791e-10	11785	Apbb1
GO:0006355	regulation of transcription, DNA-templated	3.91831	3.71981e-12	7.24791e-10	100009600	Zglp1
GO:0006355	regulation of transcription, DNA-templated	3.91831	3.71981e-12	7.24791e-10	14284	Fosl2
GO:0006355	regulation of transcription, DNA-templated	3.91831	3.71981e-12	7.24791e-10	329934	Foxo6
GO:0006355	regulation of transcription, DNA-templated	3.91831	3.71981e-12	7.24791e-10	15254	Hint1
GO:0006355	regulation of transcription, DNA-templated	3.91831	3.71981e-12	7.24791e-10	14281	Fos
GO:0043065	positive regulation of apoptotic process	6.61236	2.19919e-11	3.97896e-09	12477	Ctla4
GO:0043065	positive regulation of apoptotic process	6.61236	2.19919e-11	3.97896e-09	71839	Osgin1
GO:0043065	positive regulation of apoptotic process	6.61236	2.19919e-11	3.97896e-09	194655	Klf11
GO:0043065	positive regulation of apoptotic process	6.61236	2.19919e-11	3.97896e-09	15370	Nr4a1
GO:0043065	positive regulation of apoptotic process	6.61236	2.19919e-11	3.97896e-09	66824	Pycard
GO:0043065	positive regulation of apoptotic process	6.61236	2.19919e-11	3.97896e-09	72565	Uaca
GO:0043065	positive regulation of apoptotic process	6.61236	2.19919e-11	3.97896e-09	13198	Ddit3
GO:0043065	positive regulation of apoptotic process	6.61236	2.19919e-11	3.97896e-09	52521	Zfp622
GO:0043065	positive regulation of apoptotic process	6.61236	2.19919e-11	3.97896e-09	56330	Pdcd5
GO:0043065	positive regulation of apoptotic process	6.61236	2.19919e-11	3.97896e-09	13804	Endog
GO:0043065	positive regulation of apoptotic process	6.61236	2.19919e-11	3.97896e-09	13197	Gadd45a
GO:0043065	positive regulation of apoptotic process	6.61236	2.19919e-11	3.97896e-09	19225	Ptgs2
GO:0043065	positive regulation of apoptotic process	6.61236	2.19919e-11	3.97896e-09	14694	Rack1
GO:0043065	positive regulation of apoptotic process	6.61236	2.19919e-11	3.97896e-09	50523	Lats2
GO:0043065	positive regulation of apoptotic process	6.61236	2.19919e-11	3.97896e-09	19252	Dusp1
GO:0043065	positive regulation of apoptotic process	6.61236	2.19919e-11	3.97896e-09	11785	Apbb1
GO:0043065	positive regulation of apoptotic process	6.61236	2.19919e-11	3.97896e-09	20090	Rps29
GO:0043065	positive regulation of apoptotic process	6.61236	2.19919e-11	3.97896e-09	23882	Gadd45g
GO:0043065	positive regulation of apoptotic process	6.61236	2.19919e-11	3.97896e-09	12261	C1qbp
GO:0043065	positive regulation of apoptotic process	6.61236	2.19919e-11	3.97896e-09	16176	Il1b
GO:0043065	positive regulation of apoptotic process	6.61236	2.19919e-11	3.97896e-09	17873	Gadd45b
GO:0043065	positive regulation of apoptotic process	6.61236	2.19919e-11	3.97896e-09	12257	Tspo
GO:0006397	mRNA processing	6.51304	8.83966e-11	1.49272e-08	15382	Hnrnpa1
GO:0006397	mRNA processing	6.51304	8.83966e-11	1.49272e-08	12261	C1qbp
GO:0006397	mRNA processing	6.51304	8.83966e-11	1.49272e-08	76938	Rbm17
GO:0006397	mRNA processing	6.51304	8.83966e-11	1.49272e-08	107686	Snrpd2
GO:0006397	mRNA processing	6.51304	8.83966e-11	1.49272e-08	78372	Snrnp25
GO:0006397	mRNA processing	6.51304	8.83966e-11	1.49272e-08	20227	Sart1
GO:0006397	mRNA processing	6.51304	8.83966e-11	1.49272e-08	22687	Zpr1
GO:0006397	mRNA processing	6.51304	8.83966e-11	1.49272e-08	69878	Snrpf
GO:0006397	mRNA processing	6.51304	8.83966e-11	1.49272e-08	17149	Magoh
GO:0006397	mRNA processing	6.51304	8.83966e-11	1.49272e-08	20384	Srsf5
GO:0006397	mRNA processing	6.51304	8.83966e-11	1.49272e-08	66077	Aurkaip1
GO:0006397	mRNA processing	6.51304	8.83966e-11	1.49272e-08	66070	Cwc15
GO:0006397	mRNA processing	6.51304	8.83966e-11	1.49272e-08	68592	Syf2
GO:0006397	mRNA processing	6.51304	8.83966e-11	1.49272e-08	68981	Snrpa1
GO:0006397	mRNA processing	6.51304	8.83966e-11	1.49272e-08	20641	Snrpd1
GO:0006397	mRNA processing	6.51304	8.83966e-11	1.49272e-08	66373	Lsm5
GO:0006397	mRNA processing	6.51304	8.83966e-11	1.49272e-08	50783	Lsm4
GO:0006397	mRNA processing	6.51304	8.83966e-11	1.49272e-08	68991	Ssu72
GO:0006397	mRNA processing	6.51304	8.83966e-11	1.49272e-08	66094	Lsm7
GO:0006397	mRNA processing	6.51304	8.83966e-11	1.49272e-08	20643	Snrpe
GO:0006397	mRNA processing	6.51304	8.83966e-11	1.49272e-08	21681	Alyref
GO:0007275	multicellular organism development	3.61223	1.45986e-10	2.31114e-08	116904	Alpk3
GO:0007275	multicellular organism development	3.61223	1.45986e-10	2.31114e-08	235472	Prtg
GO:0007275	multicellular organism development	3.61223	1.45986e-10	2.31114e-08	100009600	Zglp1
GO:0007275	multicellular organism development	3.61223	1.45986e-10	2.31114e-08	107934	Celsr3
GO:0007275	multicellular organism development	3.61223	1.45986e-10	2.31114e-08	234130	Dkk4
GO:0007275	multicellular organism development	3.61223	1.45986e-10	2.31114e-08	68235	Mturn
GO:0007275	multicellular organism development	3.61223	1.45986e-10	2.31114e-08	78284	Creb3l4
GO:0007275	multicellular organism development	3.61223	1.45986e-10	2.31114e-08	328845	Acsbg2
GO:0007275	multicellular organism development	3.61223	1.45986e-10	2.31114e-08	93835	Amn
GO:0007275	multicellular organism development	3.61223	1.45986e-10	2.31114e-08	207742	Rnf43
GO:0007275	multicellular organism development	3.61223	1.45986e-10	2.31114e-08	213575	Dync2li1
GO:0007275	multicellular organism development	3.61223	1.45986e-10	2.31114e-08	14171	Fgf17
GO:0007275	multicellular organism development	3.61223	1.45986e-10	2.31114e-08	17242	Mdk
GO:0007275	multicellular organism development	3.61223	1.45986e-10	2.31114e-08	12661	Chl1
GO:0007275	multicellular organism development	3.61223	1.45986e-10	2.31114e-08	66912	Bzw2
GO:0007275	multicellular organism development	3.61223	1.45986e-10	2.31114e-08	71242	Spata24
GO:0007275	multicellular organism development	3.61223	1.45986e-10	2.31114e-08	16147	Ihh
GO:0007275	multicellular organism development	3.61223	1.45986e-10	2.31114e-08	18508	Pax6
GO:0007275	multicellular organism development	3.61223	1.45986e-10	2.31114e-08	11838	Arc
GO:0007275	multicellular organism development	3.61223	1.45986e-10	2.31114e-08	12154	Bmp10
GO:0007275	multicellular organism development	3.61223	1.45986e-10	2.31114e-08	12592	Cdx4
GO:0007275	multicellular organism development	3.61223	1.45986e-10	2.31114e-08	59022	Edf1
GO:0007275	multicellular organism development	3.61223	1.45986e-10	2.31114e-08	269855	Ssc5d
GO:0007275	multicellular organism development	3.61223	1.45986e-10	2.31114e-08	15902	Id2
GO:0007275	multicellular organism development	3.61223	1.45986e-10	2.31114e-08	59091	Jph2
GO:0007275	multicellular organism development	3.61223	1.45986e-10	2.31114e-08	20439	Siah2
GO:0007275	multicellular organism development	3.61223	1.45986e-10	2.31114e-08	23882	Gadd45g
GO:0007275	multicellular organism development	3.61223	1.45986e-10	2.31114e-08	17691	Sik1
GO:0007275	multicellular organism development	3.61223	1.45986e-10	2.31114e-08	17873	Gadd45b
GO:0007275	multicellular organism development	3.61223	1.45986e-10	2.31114e-08	22687	Zpr1
GO:0007275	multicellular organism development	3.61223	1.45986e-10	2.31114e-08	20613	Snai1
GO:0007275	multicellular organism development	3.61223	1.45986e-10	2.31114e-08	19716	Bex1
GO:0007275	multicellular organism development	3.61223	1.45986e-10	2.31114e-08	54156	Egfl6
GO:0007275	multicellular organism development	3.61223	1.45986e-10	2.31114e-08	24064	Spry2
GO:0007275	multicellular organism development	3.61223	1.45986e-10	2.31114e-08	22340	Vegfb
GO:0007275	multicellular organism development	3.61223	1.45986e-10	2.31114e-08	320563	Islr2
GO:0007275	multicellular organism development	3.61223	1.45986e-10	2.31114e-08	14694	Rack1
GO:0006357	regulation of transcription by RNA polymerase II	3.08171	5.60744e-10	8.35509e-08	114565	Zbtb21
GO:0006357	regulation of transcription by RNA polymerase II	3.08171	5.60744e-10	8.35509e-08	68992	Zfp580
GO:0006357	regulation of transcription by RNA polymerase II	3.08171	5.60744e-10	8.35509e-08	78284	Creb3l4
GO:0006357	regulation of transcription by RNA polymerase II	3.08171	5.60744e-10	8.35509e-08	104383	Rcor2
GO:0006357	regulation of transcription by RNA polymerase II	3.08171	5.60744e-10	8.35509e-08	23872	Ets2
GO:0006357	regulation of transcription by RNA polymerase II	3.08171	5.60744e-10	8.35509e-08	20899	Stra8
GO:0006357	regulation of transcription by RNA polymerase II	3.08171	5.60744e-10	8.35509e-08	58805	Mlxipl
GO:0006357	regulation of transcription by RNA polymerase II	3.08171	5.60744e-10	8.35509e-08	626802	Gm14322
GO:0006357	regulation of transcription by RNA polymerase II	3.08171	5.60744e-10	8.35509e-08	21847	Klf10
GO:0006357	regulation of transcription by RNA polymerase II	3.08171	5.60744e-10	8.35509e-08	56771	Med20
GO:0006357	regulation of transcription by RNA polymerase II	3.08171	5.60744e-10	8.35509e-08	20893	Bhlhe40
GO:0006357	regulation of transcription by RNA polymerase II	3.08171	5.60744e-10	8.35509e-08	20613	Snai1
GO:0006357	regulation of transcription by RNA polymerase II	3.08171	5.60744e-10	8.35509e-08	52468	Ctdsp2
GO:0006357	regulation of transcription by RNA polymerase II	3.08171	5.60744e-10	8.35509e-08	21815	Tgif1
GO:0006357	regulation of transcription by RNA polymerase II	3.08171	5.60744e-10	8.35509e-08	15312	Hmgn1
GO:0006357	regulation of transcription by RNA polymerase II	3.08171	5.60744e-10	8.35509e-08	194655	Klf11
GO:0006357	regulation of transcription by RNA polymerase II	3.08171	5.60744e-10	8.35509e-08	14284	Fosl2
GO:0006357	regulation of transcription by RNA polymerase II	3.08171	5.60744e-10	8.35509e-08	14815	Nr3c1
GO:0006357	regulation of transcription by RNA polymerase II	3.08171	5.60744e-10	8.35509e-08	72504	Taf4b
GO:0006357	regulation of transcription by RNA polymerase II	3.08171	5.60744e-10	8.35509e-08	20681	Sox8
GO:0006357	regulation of transcription by RNA polymerase II	3.08171	5.60744e-10	8.35509e-08	11910	Atf3
GO:0006357	regulation of transcription by RNA polymerase II	3.08171	5.60744e-10	8.35509e-08	12592	Cdx4
GO:0006357	regulation of transcription by RNA polymerase II	3.08171	5.60744e-10	8.35509e-08	13654	Egr2
GO:0006357	regulation of transcription by RNA polymerase II	3.08171	5.60744e-10	8.35509e-08	100009600	Zglp1
GO:0006357	regulation of transcription by RNA polymerase II	3.08171	5.60744e-10	8.35509e-08	14281	Fos
GO:0006357	regulation of transcription by RNA polymerase II	3.08171	5.60744e-10	8.35509e-08	77766	Elp4
GO:0006357	regulation of transcription by RNA polymerase II	3.08171	5.60744e-10	8.35509e-08	233058	Zfp420
GO:0006357	regulation of transcription by RNA polymerase II	3.08171	5.60744e-10	8.35509e-08	18227	Nr4a2
GO:0006357	regulation of transcription by RNA polymerase II	3.08171	5.60744e-10	8.35509e-08	15370	Nr4a1
GO:0006357	regulation of transcription by RNA polymerase II	3.08171	5.60744e-10	8.35509e-08	16478	Jund
GO:0006357	regulation of transcription by RNA polymerase II	3.08171	5.60744e-10	8.35509e-08	74195	Elp3
GO:0006357	regulation of transcription by RNA polymerase II	3.08171	5.60744e-10	8.35509e-08	16477	Junb
GO:0006357	regulation of transcription by RNA polymerase II	3.08171	5.60744e-10	8.35509e-08	18508	Pax6
GO:0006357	regulation of transcription by RNA polymerase II	3.08171	5.60744e-10	8.35509e-08	17420	Mnat1
GO:0006357	regulation of transcription by RNA polymerase II	3.08171	5.60744e-10	8.35509e-08	12608	Cebpb
GO:0006357	regulation of transcription by RNA polymerase II	3.08171	5.60744e-10	8.35509e-08	13653	Egr1
GO:0006357	regulation of transcription by RNA polymerase II	3.08171	5.60744e-10	8.35509e-08	329934	Foxo6
GO:0006357	regulation of transcription by RNA polymerase II	3.08171	5.60744e-10	8.35509e-08	16600	Klf4
GO:0006357	regulation of transcription by RNA polymerase II	3.08171	5.60744e-10	8.35509e-08	17133	Maff
GO:0006357	regulation of transcription by RNA polymerase II	3.08171	5.60744e-10	8.35509e-08	73754	Thap1
GO:0006357	regulation of transcription by RNA polymerase II	3.08171	5.60744e-10	8.35509e-08	17135	Mafk
GO:0006357	regulation of transcription by RNA polymerase II	3.08171	5.60744e-10	8.35509e-08	18124	Nr4a3
GO:0006357	regulation of transcription by RNA polymerase II	3.08171	5.60744e-10	8.35509e-08	13198	Ddit3
GO:0006915	apoptotic process	4.65217	1.48103e-09	2.08414e-07	11785	Apbb1
GO:0006915	apoptotic process	4.65217	1.48103e-09	2.08414e-07	15370	Nr4a1
GO:0006915	apoptotic process	4.65217	1.48103e-09	2.08414e-07	17872	Ppp1r15a
GO:0006915	apoptotic process	4.65217	1.48103e-09	2.08414e-07	67733	Itgb3bp
GO:0006915	apoptotic process	4.65217	1.48103e-09	2.08414e-07	17873	Gadd45b
GO:0006915	apoptotic process	4.65217	1.48103e-09	2.08414e-07	27050	Rps3
GO:0006915	apoptotic process	4.65217	1.48103e-09	2.08414e-07	15254	Hint1
GO:0006915	apoptotic process	4.65217	1.48103e-09	2.08414e-07	23922	Jtb
GO:0006915	apoptotic process	4.65217	1.48103e-09	2.08414e-07	12070	Bex3
GO:0006915	apoptotic process	4.65217	1.48103e-09	2.08414e-07	14694	Rack1
GO:0006915	apoptotic process	4.65217	1.48103e-09	2.08414e-07	13198	Ddit3
GO:0006915	apoptotic process	4.65217	1.48103e-09	2.08414e-07	21929	Tnfaip3
GO:0006915	apoptotic process	4.65217	1.48103e-09	2.08414e-07	68917	Hint2
GO:0006915	apoptotic process	4.65217	1.48103e-09	2.08414e-07	11798	Xiap
GO:0006915	apoptotic process	4.65217	1.48103e-09	2.08414e-07	23882	Gadd45g
GO:0006915	apoptotic process	4.65217	1.48103e-09	2.08414e-07	12261	C1qbp
GO:0006915	apoptotic process	4.65217	1.48103e-09	2.08414e-07	20439	Siah2
GO:0006915	apoptotic process	4.65217	1.48103e-09	2.08414e-07	28106	Mydgf
GO:0006915	apoptotic process	4.65217	1.48103e-09	2.08414e-07	14373	G0s2
GO:0006915	apoptotic process	4.65217	1.48103e-09	2.08414e-07	56330	Pdcd5
GO:0006915	apoptotic process	4.65217	1.48103e-09	2.08414e-07	18712	Pim1
GO:0006915	apoptotic process	4.65217	1.48103e-09	2.08414e-07	223775	Pim3
GO:0006915	apoptotic process	4.65217	1.48103e-09	2.08414e-07	66824	Pycard
GO:0006915	apoptotic process	4.65217	1.48103e-09	2.08414e-07	80707	Wwox
GO:0006915	apoptotic process	4.65217	1.48103e-09	2.08414e-07	194655	Klf11
GO:0010628	positive regulation of gene expression	4.78212	1.92626e-09	2.56801e-07	67025	Rpl11
GO:0010628	positive regulation of gene expression	4.78212	1.92626e-09	2.56801e-07	68992	Zfp580
GO:0010628	positive regulation of gene expression	4.78212	1.92626e-09	2.56801e-07	18508	Pax6
GO:0010628	positive regulation of gene expression	4.78212	1.92626e-09	2.56801e-07	16600	Klf4
GO:0010628	positive regulation of gene expression	4.78212	1.92626e-09	2.56801e-07	65019	Rpl23
GO:0010628	positive regulation of gene expression	4.78212	1.92626e-09	2.56801e-07	20681	Sox8
GO:0010628	positive regulation of gene expression	4.78212	1.92626e-09	2.56801e-07	22687	Zpr1
GO:0010628	positive regulation of gene expression	4.78212	1.92626e-09	2.56801e-07	17872	Ppp1r15a
GO:0010628	positive regulation of gene expression	4.78212	1.92626e-09	2.56801e-07	16176	Il1b
GO:0010628	positive regulation of gene expression	4.78212	1.92626e-09	2.56801e-07	13036	Ctsh
GO:0010628	positive regulation of gene expression	4.78212	1.92626e-09	2.56801e-07	27103	Eif2ak4
GO:0010628	positive regulation of gene expression	4.78212	1.92626e-09	2.56801e-07	24064	Spry2
GO:0010628	positive regulation of gene expression	4.78212	1.92626e-09	2.56801e-07	27050	Rps3
GO:0010628	positive regulation of gene expression	4.78212	1.92626e-09	2.56801e-07	15902	Id2
GO:0010628	positive regulation of gene expression	4.78212	1.92626e-09	2.56801e-07	56330	Pdcd5
GO:0010628	positive regulation of gene expression	4.78212	1.92626e-09	2.56801e-07	66259	Camk2n1
GO:0010628	positive regulation of gene expression	4.78212	1.92626e-09	2.56801e-07	17381	Mmp12
GO:0010628	positive regulation of gene expression	4.78212	1.92626e-09	2.56801e-07	11910	Atf3
GO:0010628	positive regulation of gene expression	4.78212	1.92626e-09	2.56801e-07	13653	Egr1
GO:0010628	positive regulation of gene expression	4.78212	1.92626e-09	2.56801e-07	12608	Cebpb
GO:0010628	positive regulation of gene expression	4.78212	1.92626e-09	2.56801e-07	64654	Fgf23
GO:0010628	positive regulation of gene expression	4.78212	1.92626e-09	2.56801e-07	18030	Nfil3
GO:0010628	positive regulation of gene expression	4.78212	1.92626e-09	2.56801e-07	14171	Fgf17
GO:0010628	positive regulation of gene expression	4.78212	1.92626e-09	2.56801e-07	12154	Bmp10
GO:0000027	ribosomal large subunit assembly	31.2083	7.28385e-09	9.225e-07	268449	Rpl23a
GO:0000027	ribosomal large subunit assembly	31.2083	7.28385e-09	9.225e-07	27367	Rpl3
GO:0000027	ribosomal large subunit assembly	31.2083	7.28385e-09	9.225e-07	59014	Rrs1
GO:0000027	ribosomal large subunit assembly	31.2083	7.28385e-09	9.225e-07	67025	Rpl11
GO:0000027	ribosomal large subunit assembly	31.2083	7.28385e-09	9.225e-07	110954	Rpl10
GO:0000027	ribosomal large subunit assembly	31.2083	7.28385e-09	9.225e-07	19988	Rpl6
GO:0000027	ribosomal large subunit assembly	31.2083	7.28385e-09	9.225e-07	68077	Nop53
GO:0048511	rhythmic process	9.15132	9.91019e-09	1.19536e-06	15902	Id2
GO:0048511	rhythmic process	9.15132	9.91019e-09	1.19536e-06	64707	Suv39h2
GO:0048511	rhythmic process	9.15132	9.91019e-09	1.19536e-06	17691	Sik1
GO:0048511	rhythmic process	9.15132	9.91019e-09	1.19536e-06	70118	Srrd
GO:0048511	rhythmic process	9.15132	9.91019e-09	1.19536e-06	12569	Cdk5r1
GO:0048511	rhythmic process	9.15132	9.91019e-09	1.19536e-06	21847	Klf10
GO:0048511	rhythmic process	9.15132	9.91019e-09	1.19536e-06	20893	Bhlhe40
GO:0048511	rhythmic process	9.15132	9.91019e-09	1.19536e-06	18030	Nfil3
GO:0048511	rhythmic process	9.15132	9.91019e-09	1.19536e-06	13653	Egr1
GO:0048511	rhythmic process	9.15132	9.91019e-09	1.19536e-06	229599	Ciart
GO:0048511	rhythmic process	9.15132	9.91019e-09	1.19536e-06	20439	Siah2
GO:0048511	rhythmic process	9.15132	9.91019e-09	1.19536e-06	18626	Per1
GO:0048511	rhythmic process	9.15132	9.91019e-09	1.19536e-06	14694	Rack1
GO:0042273	ribosomal large subunit biogenesis	28.8077	1.36208e-08	1.56825e-06	59014	Rrs1
GO:0042273	ribosomal large subunit biogenesis	28.8077	1.36208e-08	1.56825e-06	52521	Zfp622
GO:0042273	ribosomal large subunit biogenesis	28.8077	1.36208e-08	1.56825e-06	19989	Rpl7
GO:0042273	ribosomal large subunit biogenesis	28.8077	1.36208e-08	1.56825e-06	68083	Pak1ip1
GO:0042273	ribosomal large subunit biogenesis	28.8077	1.36208e-08	1.56825e-06	67025	Rpl11
GO:0042273	ribosomal large subunit biogenesis	28.8077	1.36208e-08	1.56825e-06	67115	Rpl14
GO:0042273	ribosomal large subunit biogenesis	28.8077	1.36208e-08	1.56825e-06	57808	Rpl35a
GO:0006366	transcription by RNA polymerase II	10.7	3.24081e-08	3.56912e-06	17749	Polr2k
GO:0006366	transcription by RNA polymerase II	10.7	3.24081e-08	3.56912e-06	68705	Gtf2f2
GO:0006366	transcription by RNA polymerase II	10.7	3.24081e-08	3.56912e-06	14281	Fos
GO:0006366	transcription by RNA polymerase II	10.7	3.24081e-08	3.56912e-06	17420	Mnat1
GO:0006366	transcription by RNA polymerase II	10.7	3.24081e-08	3.56912e-06	16477	Junb
GO:0006366	transcription by RNA polymerase II	10.7	3.24081e-08	3.56912e-06	14284	Fosl2
GO:0006366	transcription by RNA polymerase II	10.7	3.24081e-08	3.56912e-06	16478	Jund
GO:0006366	transcription by RNA polymerase II	10.7	3.24081e-08	3.56912e-06	72504	Taf4b
GO:0006366	transcription by RNA polymerase II	10.7	3.24081e-08	3.56912e-06	18030	Nfil3
GO:0006366	transcription by RNA polymerase II	10.7	3.24081e-08	3.56912e-06	216154	Med16
GO:0006366	transcription by RNA polymerase II	10.7	3.24081e-08	3.56912e-06	99730	Taf13
GO:0050728	negative regulation of inflammatory response	10.5089	3.92244e-08	4.13981e-06	21929	Tnfaip3
GO:0050728	negative regulation of inflammatory response	10.5089	3.92244e-08	4.13981e-06	72565	Uaca
GO:0050728	negative regulation of inflammatory response	10.5089	3.92244e-08	4.13981e-06	65113	Ndfip1
GO:0050728	negative regulation of inflammatory response	10.5089	3.92244e-08	4.13981e-06	107221	Ffar4
GO:0050728	negative regulation of inflammatory response	10.5089	3.92244e-08	4.13981e-06	16365	Acod1
GO:0050728	negative regulation of inflammatory response	10.5089	3.92244e-08	4.13981e-06	109815	Selenos
GO:0050728	negative regulation of inflammatory response	10.5089	3.92244e-08	4.13981e-06	216799	Nlrp3
GO:0050728	negative regulation of inflammatory response	10.5089	3.92244e-08	4.13981e-06	432940	Otulin
GO:0050728	negative regulation of inflammatory response	10.5089	3.92244e-08	4.13981e-06	12702	Socs3
GO:0050728	negative regulation of inflammatory response	10.5089	3.92244e-08	4.13981e-06	20655	Sod1
GO:0050728	negative regulation of inflammatory response	10.5089	3.92244e-08	4.13981e-06	16153	Il10
GO:0016310	phosphorylation	4.1925	5.18105e-08	5.24944e-06	101320	Dyrk4
GO:0016310	phosphorylation	4.1925	5.18105e-08	5.24944e-06	18712	Pim1
GO:0016310	phosphorylation	4.1925	5.18105e-08	5.24944e-06	110197	Dgkg
GO:0016310	phosphorylation	4.1925	5.18105e-08	5.24944e-06	140859	Nek8
GO:0016310	phosphorylation	4.1925	5.18105e-08	5.24944e-06	116904	Alpk3
GO:0016310	phosphorylation	4.1925	5.18105e-08	5.24944e-06	18103	Nme2
GO:0016310	phosphorylation	4.1925	5.18105e-08	5.24944e-06	17691	Sik1
GO:0016310	phosphorylation	4.1925	5.18105e-08	5.24944e-06	74442	Sgms2
GO:0016310	phosphorylation	4.1925	5.18105e-08	5.24944e-06	67426	Coq8a
GO:0016310	phosphorylation	4.1925	5.18105e-08	5.24944e-06	18102	Nme1
GO:0016310	phosphorylation	4.1925	5.18105e-08	5.24944e-06	20620	Plk2
GO:0016310	phosphorylation	4.1925	5.18105e-08	5.24944e-06	50523	Lats2
GO:0016310	phosphorylation	4.1925	5.18105e-08	5.24944e-06	12041	Bckdk
GO:0016310	phosphorylation	4.1925	5.18105e-08	5.24944e-06	17179	Matk
GO:0016310	phosphorylation	4.1925	5.18105e-08	5.24944e-06	223775	Pim3
GO:0016310	phosphorylation	4.1925	5.18105e-08	5.24944e-06	14635	Galk1
GO:0016310	phosphorylation	4.1925	5.18105e-08	5.24944e-06	22367	Vrk1
GO:0016310	phosphorylation	4.1925	5.18105e-08	5.24944e-06	229949	Ak5
GO:0016310	phosphorylation	4.1925	5.18105e-08	5.24944e-06	12660	Chka
GO:0016310	phosphorylation	4.1925	5.18105e-08	5.24944e-06	27103	Eif2ak4
GO:0016310	phosphorylation	4.1925	5.18105e-08	5.24944e-06	20811	Srms
GO:0016310	phosphorylation	4.1925	5.18105e-08	5.24944e-06	216019	Hkdc1
GO:0016310	phosphorylation	4.1925	5.18105e-08	5.24944e-06	223753	Cerk
GO:0032981	mitochondrial respiratory chain complex I assembly	17.4694	7.19296e-08	7.0076e-06	54405	Ndufa1
GO:0032981	mitochondrial respiratory chain complex I assembly	17.4694	7.19296e-08	7.0076e-06	208501	Ndufaf8
GO:0032981	mitochondrial respiratory chain complex I assembly	17.4694	7.19296e-08	7.0076e-06	595136	Ndufs5
GO:0032981	mitochondrial respiratory chain complex I assembly	17.4694	7.19296e-08	7.0076e-06	76826	Nubpl
GO:0032981	mitochondrial respiratory chain complex I assembly	17.4694	7.19296e-08	7.0076e-06	67130	Ndufa6
GO:0032981	mitochondrial respiratory chain complex I assembly	17.4694	7.19296e-08	7.0076e-06	17991	Ndufa2
GO:0032981	mitochondrial respiratory chain complex I assembly	17.4694	7.19296e-08	7.0076e-06	69875	Ndufa11
GO:0032981	mitochondrial respiratory chain complex I assembly	17.4694	7.19296e-08	7.0076e-06	230075	Ndufb6
GO:0035914	skeletal muscle cell differentiation	15.5636	1.84863e-07	1.73429e-05	14281	Fos
GO:0035914	skeletal muscle cell differentiation	15.5636	1.84863e-07	1.73429e-05	17133	Maff
GO:0035914	skeletal muscle cell differentiation	15.5636	1.84863e-07	1.73429e-05	15370	Nr4a1
GO:0035914	skeletal muscle cell differentiation	15.5636	1.84863e-07	1.73429e-05	13654	Egr2
GO:0035914	skeletal muscle cell differentiation	15.5636	1.84863e-07	1.73429e-05	13653	Egr1
GO:0035914	skeletal muscle cell differentiation	15.5636	1.84863e-07	1.73429e-05	20681	Sox8
GO:0035914	skeletal muscle cell differentiation	15.5636	1.84863e-07	1.73429e-05	56771	Med20
GO:0035914	skeletal muscle cell differentiation	15.5636	1.84863e-07	1.73429e-05	11910	Atf3
GO:0043303	mast cell degranulation	41.1538	3.39985e-07	3.07565e-05	56743	Lat2
GO:0043303	mast cell degranulation	41.1538	3.39985e-07	3.07565e-05	12890	Cplx2
GO:0043303	mast cell degranulation	41.1538	3.39985e-07	3.07565e-05	18124	Nr4a3
GO:0043303	mast cell degranulation	41.1538	3.39985e-07	3.07565e-05	380732	Milr1
GO:0043303	mast cell degranulation	41.1538	3.39985e-07	3.07565e-05	93670	Tac4
GO:0045444	fat cell differentiation	11.4643	4.07451e-07	3.55887e-05	16600	Klf4
GO:0045444	fat cell differentiation	11.4643	4.07451e-07	3.55887e-05	18124	Nr4a3
GO:0045444	fat cell differentiation	11.4643	4.07451e-07	3.55887e-05	18227	Nr4a2
GO:0045444	fat cell differentiation	11.4643	4.07451e-07	3.55887e-05	15370	Nr4a1
GO:0045444	fat cell differentiation	11.4643	4.07451e-07	3.55887e-05	20681	Sox8
GO:0045444	fat cell differentiation	11.4643	4.07451e-07	3.55887e-05	13654	Egr2
GO:0045444	fat cell differentiation	11.4643	4.07451e-07	3.55887e-05	12608	Cebpb
GO:0045444	fat cell differentiation	11.4643	4.07451e-07	3.55887e-05	107221	Ffar4
GO:0045444	fat cell differentiation	11.4643	4.07451e-07	3.55887e-05	246747	Adig
GO:0030335	positive regulation of cell migration	5.96813	5.5888e-07	4.71881e-05	74195	Elp3
GO:0030335	positive regulation of cell migration	5.96813	5.5888e-07	4.71881e-05	16176	Il1b
GO:0030335	positive regulation of cell migration	5.96813	5.5888e-07	4.71881e-05	14828	Hspa5
GO:0030335	positive regulation of cell migration	5.96813	5.5888e-07	4.71881e-05	20613	Snai1
GO:0030335	positive regulation of cell migration	5.96813	5.5888e-07	4.71881e-05	17242	Mdk
GO:0030335	positive regulation of cell migration	5.96813	5.5888e-07	4.71881e-05	24064	Spry2
GO:0030335	positive regulation of cell migration	5.96813	5.5888e-07	4.71881e-05	13036	Ctsh
GO:0030335	positive regulation of cell migration	5.96813	5.5888e-07	4.71881e-05	11854	Rhod
GO:0030335	positive regulation of cell migration	5.96813	5.5888e-07	4.71881e-05	80795	Selenok
GO:0030335	positive regulation of cell migration	5.96813	5.5888e-07	4.71881e-05	13614	Edn1
GO:0030335	positive regulation of cell migration	5.96813	5.5888e-07	4.71881e-05	14694	Rack1
GO:0030335	positive regulation of cell migration	5.96813	5.5888e-07	4.71881e-05	12721	Coro1a
GO:0030335	positive regulation of cell migration	5.96813	5.5888e-07	4.71881e-05	384783	Irs2
GO:0030335	positive regulation of cell migration	5.96813	5.5888e-07	4.71881e-05	320664	Cass4
GO:0032496	response to lipopolysaccharide	9.1453	6.92839e-07	5.66117e-05	12608	Cebpb
GO:0032496	response to lipopolysaccharide	9.1453	6.92839e-07	5.66117e-05	16176	Il1b
GO:0032496	response to lipopolysaccharide	9.1453	6.92839e-07	5.66117e-05	14728	Lilrb4a
GO:0032496	response to lipopolysaccharide	9.1453	6.92839e-07	5.66117e-05	19225	Ptgs2
GO:0032496	response to lipopolysaccharide	9.1453	6.92839e-07	5.66117e-05	18035	Nfkbia
GO:0032496	response to lipopolysaccharide	9.1453	6.92839e-07	5.66117e-05	22121	Rpl13a
GO:0032496	response to lipopolysaccharide	9.1453	6.92839e-07	5.66117e-05	63953	Dusp10
GO:0032496	response to lipopolysaccharide	9.1453	6.92839e-07	5.66117e-05	16365	Acod1
GO:0032496	response to lipopolysaccharide	9.1453	6.92839e-07	5.66117e-05	100689	Spon2
GO:0032496	response to lipopolysaccharide	9.1453	6.92839e-07	5.66117e-05	211770	Trib1
GO:0007165	signal transduction	2.84233	1.23819e-06	9.80106e-05	12070	Bex3
GO:0007165	signal transduction	2.84233	1.23819e-06	9.80106e-05	110197	Dgkg
GO:0007165	signal transduction	2.84233	1.23819e-06	9.80106e-05	12671	Chrm3
GO:0007165	signal transduction	2.84233	1.23819e-06	9.80106e-05	110326	Tas1r1
GO:0007165	signal transduction	2.84233	1.23819e-06	9.80106e-05	107934	Celsr3
GO:0007165	signal transduction	2.84233	1.23819e-06	9.80106e-05	16976	Lrpap1
GO:0007165	signal transduction	2.84233	1.23819e-06	9.80106e-05	12702	Socs3
GO:0007165	signal transduction	2.84233	1.23819e-06	9.80106e-05	78826	P2ry10
GO:0007165	signal transduction	2.84233	1.23819e-06	9.80106e-05	228543	Rhov
GO:0007165	signal transduction	2.84233	1.23819e-06	9.80106e-05	19730	Ralgds
GO:0007165	signal transduction	2.84233	1.23819e-06	9.80106e-05	14269	Fnbp1
GO:0007165	signal transduction	2.84233	1.23819e-06	9.80106e-05	213956	Fam83f
GO:0007165	signal transduction	2.84233	1.23819e-06	9.80106e-05	71878	Fam83d
GO:0007165	signal transduction	2.84233	1.23819e-06	9.80106e-05	54199	Ccrl2
GO:0007165	signal transduction	2.84233	1.23819e-06	9.80106e-05	20681	Sox8
GO:0007165	signal transduction	2.84233	1.23819e-06	9.80106e-05	229277	Stoml3
GO:0007165	signal transduction	2.84233	1.23819e-06	9.80106e-05	14400	Gabrb1
GO:0007165	signal transduction	2.84233	1.23819e-06	9.80106e-05	19416	Rasd1
GO:0007165	signal transduction	2.84233	1.23819e-06	9.80106e-05	64378	Gpr88
GO:0007165	signal transduction	2.84233	1.23819e-06	9.80106e-05	14685	Gnat1
GO:0007165	signal transduction	2.84233	1.23819e-06	9.80106e-05	14760	Gpr19
GO:0007165	signal transduction	2.84233	1.23819e-06	9.80106e-05	69159	Rhebl1
GO:0007165	signal transduction	2.84233	1.23819e-06	9.80106e-05	14579	Gem
GO:0007165	signal transduction	2.84233	1.23819e-06	9.80106e-05	19716	Bex1
GO:0007165	signal transduction	2.84233	1.23819e-06	9.80106e-05	384783	Irs2
GO:0007165	signal transduction	2.84233	1.23819e-06	9.80106e-05	107221	Ffar4
GO:0007165	signal transduction	2.84233	1.23819e-06	9.80106e-05	80794	Cblc
GO:0007165	signal transduction	2.84233	1.23819e-06	9.80106e-05	14680	Gnal
GO:0007165	signal transduction	2.84233	1.23819e-06	9.80106e-05	258728	Olfr482
GO:0007165	signal transduction	2.84233	1.23819e-06	9.80106e-05	232441	Rerg
GO:0007165	signal transduction	2.84233	1.23819e-06	9.80106e-05	56437	Rrad
GO:0006954	inflammatory response	4.79552	1.43309e-06	0.00011	68992	Zfp580
GO:0006954	inflammatory response	4.79552	1.43309e-06	0.00011	93670	Tac4
GO:0006954	inflammatory response	4.79552	1.43309e-06	0.00011	20310	Cxcl2
GO:0006954	inflammatory response	4.79552	1.43309e-06	0.00011	71660	Rarres2
GO:0006954	inflammatory response	4.79552	1.43309e-06	0.00011	16176	Il1b
GO:0006954	inflammatory response	4.79552	1.43309e-06	0.00011	14728	Lilrb4a
GO:0006954	inflammatory response	4.79552	1.43309e-06	0.00011	54199	Ccrl2
GO:0006954	inflammatory response	4.79552	1.43309e-06	0.00011	107221	Ffar4
GO:0006954	inflammatory response	4.79552	1.43309e-06	0.00011	66824	Pycard
GO:0006954	inflammatory response	4.79552	1.43309e-06	0.00011	21929	Tnfaip3
GO:0006954	inflammatory response	4.79552	1.43309e-06	0.00011	216799	Nlrp3
GO:0006954	inflammatory response	4.79552	1.43309e-06	0.00011	16963	Xcl1
GO:0006954	inflammatory response	4.79552	1.43309e-06	0.00011	20303	Ccl4
GO:0006954	inflammatory response	4.79552	1.43309e-06	0.00011	16365	Acod1
GO:0006954	inflammatory response	4.79552	1.43309e-06	0.00011	20969	Sdc1
GO:0006954	inflammatory response	4.79552	1.43309e-06	0.00011	19225	Ptgs2
GO:0008284	positive regulation of cell proliferation	3.88385	1.52212e-06	0.000113398	76846	Rps9
GO:0008284	positive regulation of cell proliferation	3.88385	1.52212e-06	0.000113398	13036	Ctsh
GO:0008284	positive regulation of cell proliferation	3.88385	1.52212e-06	0.000113398	11910	Atf3
GO:0008284	positive regulation of cell proliferation	3.88385	1.52212e-06	0.000113398	58805	Mlxipl
GO:0008284	positive regulation of cell proliferation	3.88385	1.52212e-06	0.000113398	69573	Hilpda
GO:0008284	positive regulation of cell proliferation	3.88385	1.52212e-06	0.000113398	19225	Ptgs2
GO:0008284	positive regulation of cell proliferation	3.88385	1.52212e-06	0.000113398	384783	Irs2
GO:0008284	positive regulation of cell proliferation	3.88385	1.52212e-06	0.000113398	68592	Syf2
GO:0008284	positive regulation of cell proliferation	3.88385	1.52212e-06	0.000113398	18263	Odc1
GO:0008284	positive regulation of cell proliferation	3.88385	1.52212e-06	0.000113398	14171	Fgf17
GO:0008284	positive regulation of cell proliferation	3.88385	1.52212e-06	0.000113398	66915	Cops9
GO:0008284	positive regulation of cell proliferation	3.88385	1.52212e-06	0.000113398	267019	Rps15a
GO:0008284	positive regulation of cell proliferation	3.88385	1.52212e-06	0.000113398	16176	Il1b
GO:0008284	positive regulation of cell proliferation	3.88385	1.52212e-06	0.000113398	65019	Rpl23
GO:0008284	positive regulation of cell proliferation	3.88385	1.52212e-06	0.000113398	13614	Edn1
GO:0008284	positive regulation of cell proliferation	3.88385	1.52212e-06	0.000113398	15902	Id2
GO:0008284	positive regulation of cell proliferation	3.88385	1.52212e-06	0.000113398	68010	Bambi
GO:0008284	positive regulation of cell proliferation	3.88385	1.52212e-06	0.000113398	16147	Ihh
GO:0008284	positive regulation of cell proliferation	3.88385	1.52212e-06	0.000113398	64654	Fgf23
GO:0008284	positive regulation of cell proliferation	3.88385	1.52212e-06	0.000113398	216856	Nlgn2
GO:0051726	regulation of cell cycle	8.23077	1.85648e-06	0.000134356	63955	Cables1
GO:0051726	regulation of cell cycle	8.23077	1.85648e-06	0.000134356	16477	Junb
GO:0051726	regulation of cell cycle	8.23077	1.85648e-06	0.000134356	16478	Jund
GO:0051726	regulation of cell cycle	8.23077	1.85648e-06	0.000134356	23882	Gadd45g
GO:0051726	regulation of cell cycle	8.23077	1.85648e-06	0.000134356	11798	Xiap
GO:0051726	regulation of cell cycle	8.23077	1.85648e-06	0.000134356	14694	Rack1
GO:0051726	regulation of cell cycle	8.23077	1.85648e-06	0.000134356	68077	Nop53
GO:0051726	regulation of cell cycle	8.23077	1.85648e-06	0.000134356	13197	Gadd45a
GO:0051726	regulation of cell cycle	8.23077	1.85648e-06	0.000134356	64934	Pes1
GO:0051726	regulation of cell cycle	8.23077	1.85648e-06	0.000134356	17873	Gadd45b
GO:0030968	endoplasmic reticulum unfolded protein response	14.6863	1.958e-06	0.000137767	17872	Ppp1r15a
GO:0030968	endoplasmic reticulum unfolded protein response	14.6863	1.958e-06	0.000137767	14828	Hspa5
GO:0030968	endoplasmic reticulum unfolded protein response	14.6863	1.958e-06	0.000137767	109815	Selenos
GO:0030968	endoplasmic reticulum unfolded protein response	14.6863	1.958e-06	0.000137767	27103	Eif2ak4
GO:0030968	endoplasmic reticulum unfolded protein response	14.6863	1.958e-06	0.000137767	13198	Ddit3
GO:0030968	endoplasmic reticulum unfolded protein response	14.6863	1.958e-06	0.000137767	11910	Atf3
GO:0030968	endoplasmic reticulum unfolded protein response	14.6863	1.958e-06	0.000137767	78284	Creb3l4
GO:0032088	negative regulation of NF-kappaB transcription factor activity	11.4133	2.17406e-06	0.000148835	13198	Ddit3
GO:0032088	negative regulation of NF-kappaB transcription factor activity	11.4133	2.17406e-06	0.000148835	216799	Nlrp3
GO:0032088	negative regulation of NF-kappaB transcription factor activity	11.4133	2.17406e-06	0.000148835	432940	Otulin
GO:0032088	negative regulation of NF-kappaB transcription factor activity	11.4133	2.17406e-06	0.000148835	66824	Pycard
GO:0032088	negative regulation of NF-kappaB transcription factor activity	11.4133	2.17406e-06	0.000148835	18035	Nfkbia
GO:0032088	negative regulation of NF-kappaB transcription factor activity	11.4133	2.17406e-06	0.000148835	16600	Klf4
GO:0032088	negative regulation of NF-kappaB transcription factor activity	11.4133	2.17406e-06	0.000148835	21929	Tnfaip3
GO:0032088	negative regulation of NF-kappaB transcription factor activity	11.4133	2.17406e-06	0.000148835	16365	Acod1
GO:0042274	ribosomal small subunit biogenesis	28.1579	2.93228e-06	0.00019546	75617	Rps25
GO:0042274	ribosomal small subunit biogenesis	28.1579	2.93228e-06	0.00019546	20055	Rps16
GO:0042274	ribosomal small subunit biogenesis	28.1579	2.93228e-06	0.00019546	54127	Rps28
GO:0042274	ribosomal small subunit biogenesis	28.1579	2.93228e-06	0.00019546	20085	Rps19
GO:0042274	ribosomal small subunit biogenesis	28.1579	2.93228e-06	0.00019546	20068	Rps17
GO:0043433	negative regulation of DNA-binding transcription factor activity	10.5679	3.94606e-06	0.000256291	211770	Trib1
GO:0043433	negative regulation of DNA-binding transcription factor activity	10.5679	3.94606e-06	0.000256291	13198	Ddit3
GO:0043433	negative regulation of DNA-binding transcription factor activity	10.5679	3.94606e-06	0.000256291	15902	Id2
GO:0043433	negative regulation of DNA-binding transcription factor activity	10.5679	3.94606e-06	0.000256291	20893	Bhlhe40
GO:0043433	negative regulation of DNA-binding transcription factor activity	10.5679	3.94606e-06	0.000256291	16600	Klf4
GO:0043433	negative regulation of DNA-binding transcription factor activity	10.5679	3.94606e-06	0.000256291	18712	Pim1
GO:0043433	negative regulation of DNA-binding transcription factor activity	10.5679	3.94606e-06	0.000256291	67025	Rpl11
GO:0043433	negative regulation of DNA-binding transcription factor activity	10.5679	3.94606e-06	0.000256291	16963	Xcl1
GO:0042127	regulation of cell proliferation	5.80995	5.73765e-06	0.000363337	24064	Spry2
GO:0042127	regulation of cell proliferation	5.80995	5.73765e-06	0.000363337	23922	Jtb
GO:0042127	regulation of cell proliferation	5.80995	5.73765e-06	0.000363337	16600	Klf4
GO:0042127	regulation of cell proliferation	5.80995	5.73765e-06	0.000363337	71839	Osgin1
GO:0042127	regulation of cell proliferation	5.80995	5.73765e-06	0.000363337	14815	Nr3c1
GO:0042127	regulation of cell proliferation	5.80995	5.73765e-06	0.000363337	19225	Ptgs2
GO:0042127	regulation of cell proliferation	5.80995	5.73765e-06	0.000363337	26570	Slc7a11
GO:0042127	regulation of cell proliferation	5.80995	5.73765e-06	0.000363337	16477	Junb
GO:0042127	regulation of cell proliferation	5.80995	5.73765e-06	0.000363337	20811	Srms
GO:0042127	regulation of cell proliferation	5.80995	5.73765e-06	0.000363337	15939	Ier5
GO:0042127	regulation of cell proliferation	5.80995	5.73765e-06	0.000363337	18035	Nfkbia
GO:0042127	regulation of cell proliferation	5.80995	5.73765e-06	0.000363337	16478	Jund
GO:0016477	cell migration	5.22932	6.84044e-06	0.000422606	12721	Coro1a
GO:0016477	cell migration	5.22932	6.84044e-06	0.000422606	71878	Fam83d
GO:0016477	cell migration	5.22932	6.84044e-06	0.000422606	11854	Rhod
GO:0016477	cell migration	5.22932	6.84044e-06	0.000422606	20969	Sdc1
GO:0016477	cell migration	5.22932	6.84044e-06	0.000422606	17242	Mdk
GO:0016477	cell migration	5.22932	6.84044e-06	0.000422606	68010	Bambi
GO:0016477	cell migration	5.22932	6.84044e-06	0.000422606	320664	Cass4
GO:0016477	cell migration	5.22932	6.84044e-06	0.000422606	228543	Rhov
GO:0016477	cell migration	5.22932	6.84044e-06	0.000422606	58217	Trem1
GO:0016477	cell migration	5.22932	6.84044e-06	0.000422606	20613	Snai1
GO:0016477	cell migration	5.22932	6.84044e-06	0.000422606	16160	Il12b
GO:0016477	cell migration	5.22932	6.84044e-06	0.000422606	21929	Tnfaip3
GO:0016477	cell migration	5.22932	6.84044e-06	0.000422606	11838	Arc
GO:0008033	tRNA processing	9.51111	8.83473e-06	0.000532819	107328	Trpt1
GO:0008033	tRNA processing	9.51111	8.83473e-06	0.000532819	66246	Osgep
GO:0008033	tRNA processing	9.51111	8.83473e-06	0.000532819	74097	Pop7
GO:0008033	tRNA processing	9.51111	8.83473e-06	0.000532819	74195	Elp3
GO:0008033	tRNA processing	9.51111	8.83473e-06	0.000532819	68205	Urm1
GO:0008033	tRNA processing	9.51111	8.83473e-06	0.000532819	17299	Mettl1
GO:0008033	tRNA processing	9.51111	8.83473e-06	0.000532819	66161	Pop4
GO:0008033	tRNA processing	9.51111	8.83473e-06	0.000532819	77766	Elp4
GO:1901796	regulation of signal transduction by p53 class mediator	38.9091	9.47527e-06	0.000558159	59014	Rrs1
GO:1901796	regulation of signal transduction by p53 class mediator	38.9091	9.47527e-06	0.000558159	67025	Rpl11
GO:1901796	regulation of signal transduction by p53 class mediator	38.9091	9.47527e-06	0.000558159	68083	Pak1ip1
GO:1901796	regulation of signal transduction by p53 class mediator	38.9091	9.47527e-06	0.000558159	68077	Nop53
GO:0000387	spliceosomal snRNP assembly	22.2917	1.03118e-05	0.00058044	20641	Snrpd1
GO:0000387	spliceosomal snRNP assembly	22.2917	1.03118e-05	0.00058044	107686	Snrpd2
GO:0000387	spliceosomal snRNP assembly	22.2917	1.03118e-05	0.00058044	50783	Lsm4
GO:0000387	spliceosomal snRNP assembly	22.2917	1.03118e-05	0.00058044	69878	Snrpf
GO:0000387	spliceosomal snRNP assembly	22.2917	1.03118e-05	0.00058044	20643	Snrpe
GO:0071353	cellular response to interleukin-4	22.2917	1.03118e-05	0.00058044	16963	Xcl1
GO:0071353	cellular response to interleukin-4	22.2917	1.03118e-05	0.00058044	14828	Hspa5
GO:0071353	cellular response to interleukin-4	22.2917	1.03118e-05	0.00058044	27367	Rpl3
GO:0071353	cellular response to interleukin-4	22.2917	1.03118e-05	0.00058044	18030	Nfil3
GO:0071353	cellular response to interleukin-4	22.2917	1.03118e-05	0.00058044	12721	Coro1a
GO:0090090	negative regulation of canonical Wnt signaling pathway	7.64286	1.2875e-05	0.000695941	234130	Dkk4
GO:0090090	negative regulation of canonical Wnt signaling pathway	7.64286	1.2875e-05	0.000695941	74025	Nphp3
GO:0090090	negative regulation of canonical Wnt signaling pathway	7.64286	1.2875e-05	0.000695941	50523	Lats2
GO:0090090	negative regulation of canonical Wnt signaling pathway	7.64286	1.2875e-05	0.000695941	20439	Siah2
GO:0090090	negative regulation of canonical Wnt signaling pathway	7.64286	1.2875e-05	0.000695941	13653	Egr1
GO:0090090	negative regulation of canonical Wnt signaling pathway	7.64286	1.2875e-05	0.000695941	19277	Ptpro
GO:0090090	negative regulation of canonical Wnt signaling pathway	7.64286	1.2875e-05	0.000695941	17242	Mdk
GO:0090090	negative regulation of canonical Wnt signaling pathway	7.64286	1.2875e-05	0.000695941	56612	Pfdn5
GO:0090090	negative regulation of canonical Wnt signaling pathway	7.64286	1.2875e-05	0.000695941	13198	Ddit3
GO:0071376	cellular response to corticotropin-releasing hormone stimulus	80.25	1.29132e-05	0.000695941	18227	Nr4a2
GO:0071376	cellular response to corticotropin-releasing hormone stimulus	80.25	1.29132e-05	0.000695941	15370	Nr4a1
GO:0071376	cellular response to corticotropin-releasing hormone stimulus	80.25	1.29132e-05	0.000695941	18124	Nr4a3
GO:0046034	ATP metabolic process	14.5909	1.36095e-05	0.000718182	14923	Guk1
GO:0046034	ATP metabolic process	14.5909	1.36095e-05	0.000718182	57423	Atp5j2
GO:0046034	ATP metabolic process	14.5909	1.36095e-05	0.000718182	11949	Atp5c1
GO:0046034	ATP metabolic process	14.5909	1.36095e-05	0.000718182	229949	Ak5
GO:0046034	ATP metabolic process	14.5909	1.36095e-05	0.000718182	67059	Ola1
GO:0046034	ATP metabolic process	14.5909	1.36095e-05	0.000718182	27425	Atp5l
GO:0042776	mitochondrial ATP synthesis coupled proton transport	35.6667	1.41075e-05	0.00072927	57423	Atp5j2
GO:0042776	mitochondrial ATP synthesis coupled proton transport	35.6667	1.41075e-05	0.00072927	66592	Stoml2
GO:0042776	mitochondrial ATP synthesis coupled proton transport	35.6667	1.41075e-05	0.00072927	27425	Atp5l
GO:0042776	mitochondrial ATP synthesis coupled proton transport	35.6667	1.41075e-05	0.00072927	11949	Atp5c1
GO:0030308	negative regulation of cell growth	7.52344	1.46608e-05	0.000742716	240514	Ccdc85b
GO:0030308	negative regulation of cell growth	7.52344	1.46608e-05	0.000742716	11785	Apbb1
GO:0030308	negative regulation of cell growth	7.52344	1.46608e-05	0.000742716	56437	Rrad
GO:0030308	negative regulation of cell growth	7.52344	1.46608e-05	0.000742716	232441	Rerg
GO:0030308	negative regulation of cell growth	7.52344	1.46608e-05	0.000742716	71839	Osgin1
GO:0030308	negative regulation of cell growth	7.52344	1.46608e-05	0.000742716	55942	Sertad1
GO:0030308	negative regulation of cell growth	7.52344	1.46608e-05	0.000742716	14694	Rack1
GO:0030308	negative regulation of cell growth	7.52344	1.46608e-05	0.000742716	12696	Cirbp
GO:0030308	negative regulation of cell growth	7.52344	1.46608e-05	0.000742716	12154	Bmp10
GO:0051301	cell division	4.23483	1.51853e-05	0.000754205	66296	Haus2
GO:0051301	cell division	4.23483	1.51853e-05	0.000754205	63955	Cables1
GO:0051301	cell division	4.23483	1.51853e-05	0.000754205	28135	Cep63
GO:0051301	cell division	4.23483	1.51853e-05	0.000754205	54124	Cks1b
GO:0051301	cell division	4.23483	1.51853e-05	0.000754205	71909	Haus5
GO:0051301	cell division	4.23483	1.51853e-05	0.000754205	27050	Rps3
GO:0051301	cell division	4.23483	1.51853e-05	0.000754205	218630	Ccno
GO:0051301	cell division	4.23483	1.51853e-05	0.000754205	75430	Anapc15
GO:0051301	cell division	4.23483	1.51853e-05	0.000754205	50523	Lats2
GO:0051301	cell division	4.23483	1.51853e-05	0.000754205	23922	Jtb
GO:0051301	cell division	4.23483	1.51853e-05	0.000754205	71878	Fam83d
GO:0051301	cell division	4.23483	1.51853e-05	0.000754205	22367	Vrk1
GO:0051301	cell division	4.23483	1.51853e-05	0.000754205	67956	Kmt5a
GO:0051301	cell division	4.23483	1.51853e-05	0.000754205	73738	Haus7
GO:0051301	cell division	4.23483	1.51853e-05	0.000754205	67733	Itgb3bp
GO:0001701	in utero embryonic development	4.4985	1.59666e-05	0.000777757	16477	Junb
GO:0001701	in utero embryonic development	4.4985	1.59666e-05	0.000777757	213081	Wdr19
GO:0001701	in utero embryonic development	4.4985	1.59666e-05	0.000777757	16147	Ihh
GO:0001701	in utero embryonic development	4.4985	1.59666e-05	0.000777757	17133	Maff
GO:0001701	in utero embryonic development	4.4985	1.59666e-05	0.000777757	230796	Wdtc1
GO:0001701	in utero embryonic development	4.4985	1.59666e-05	0.000777757	77626	Smpd4
GO:0001701	in utero embryonic development	4.4985	1.59666e-05	0.000777757	13614	Edn1
GO:0001701	in utero embryonic development	4.4985	1.59666e-05	0.000777757	13804	Endog
GO:0001701	in utero embryonic development	4.4985	1.59666e-05	0.000777757	57279	Slc25a20
GO:0001701	in utero embryonic development	4.4985	1.59666e-05	0.000777757	68592	Syf2
GO:0001701	in utero embryonic development	4.4985	1.59666e-05	0.000777757	20681	Sox8
GO:0001701	in utero embryonic development	4.4985	1.59666e-05	0.000777757	14218	Sh3pxd2a
GO:0001701	in utero embryonic development	4.4985	1.59666e-05	0.000777757	22658	Pcgf2
GO:0001701	in utero embryonic development	4.4985	1.59666e-05	0.000777757	218490	Btf3
GO:0008283	cell proliferation	6.40719	1.80859e-05	0.000841672	19944	Rpl29
GO:0008283	cell proliferation	6.40719	1.80859e-05	0.000841672	22687	Zpr1
GO:0008283	cell proliferation	6.40719	1.80859e-05	0.000841672	54124	Cks1b
GO:0008283	cell proliferation	6.40719	1.80859e-05	0.000841672	14685	Gnat1
GO:0008283	cell proliferation	6.40719	1.80859e-05	0.000841672	15081	H3f3b
GO:0008283	cell proliferation	6.40719	1.80859e-05	0.000841672	68083	Pak1ip1
GO:0008283	cell proliferation	6.40719	1.80859e-05	0.000841672	64934	Pes1
GO:0008283	cell proliferation	6.40719	1.80859e-05	0.000841672	116905	Dph1
GO:0008283	cell proliferation	6.40719	1.80859e-05	0.000841672	16160	Il12b
GO:0008283	cell proliferation	6.40719	1.80859e-05	0.000841672	71878	Fam83d
GO:0006811	ion transport	3.42833	1.81038e-05	0.000841672	12257	Tspo
GO:0006811	ion transport	3.42833	1.81038e-05	0.000841672	14400	Gabrb1
GO:0006811	ion transport	3.42833	1.81038e-05	0.000841672	66815	Mcub
GO:0006811	ion transport	3.42833	1.81038e-05	0.000841672	12289	Cacna1d
GO:0006811	ion transport	3.42833	1.81038e-05	0.000841672	22064	Trpc2
GO:0006811	ion transport	3.42833	1.81038e-05	0.000841672	20493	Slc10a1
GO:0006811	ion transport	3.42833	1.81038e-05	0.000841672	30060	Meltf
GO:0006811	ion transport	3.42833	1.81038e-05	0.000841672	57423	Atp5j2
GO:0006811	ion transport	3.42833	1.81038e-05	0.000841672	80795	Selenok
GO:0006811	ion transport	3.42833	1.81038e-05	0.000841672	20522	Slc23a1
GO:0006811	ion transport	3.42833	1.81038e-05	0.000841672	20500	Slc13a2
GO:0006811	ion transport	3.42833	1.81038e-05	0.000841672	69029	Smdt1
GO:0006811	ion transport	3.42833	1.81038e-05	0.000841672	58170	Asic5
GO:0006811	ion transport	3.42833	1.81038e-05	0.000841672	11949	Atp5c1
GO:0006811	ion transport	3.42833	1.81038e-05	0.000841672	67126	Atp5e
GO:0006811	ion transport	3.42833	1.81038e-05	0.000841672	27425	Atp5l
GO:0006811	ion transport	3.42833	1.81038e-05	0.000841672	317750	Slc24a5
GO:0006811	ion transport	3.42833	1.81038e-05	0.000841672	56543	Kcnd3
GO:0006811	ion transport	3.42833	1.81038e-05	0.000841672	170738	Kcnh7
GO:0006629	lipid metabolic process	3.57328	1.82756e-05	0.000841672	328845	Acsbg2
GO:0006629	lipid metabolic process	3.57328	1.82756e-05	0.000841672	52538	Acaa2
GO:0006629	lipid metabolic process	3.57328	1.82756e-05	0.000841672	68917	Hint2
GO:0006629	lipid metabolic process	3.57328	1.82756e-05	0.000841672	74442	Sgms2
GO:0006629	lipid metabolic process	3.57328	1.82756e-05	0.000841672	13076	Cyp1a1
GO:0006629	lipid metabolic process	3.57328	1.82756e-05	0.000841672	19225	Ptgs2
GO:0006629	lipid metabolic process	3.57328	1.82756e-05	0.000841672	231070	Insig1
GO:0006629	lipid metabolic process	3.57328	1.82756e-05	0.000841672	11370	Acadvl
GO:0006629	lipid metabolic process	3.57328	1.82756e-05	0.000841672	17777	Mttp
GO:0006629	lipid metabolic process	3.57328	1.82756e-05	0.000841672	231510	Gpat3
GO:0006629	lipid metabolic process	3.57328	1.82756e-05	0.000841672	74025	Nphp3
GO:0006629	lipid metabolic process	3.57328	1.82756e-05	0.000841672	57875	Angptl4
GO:0006629	lipid metabolic process	3.57328	1.82756e-05	0.000841672	257633	Acsf3
GO:0006629	lipid metabolic process	3.57328	1.82756e-05	0.000841672	14979	H2-Ke6
GO:0006629	lipid metabolic process	3.57328	1.82756e-05	0.000841672	18476	Pafah1b3
GO:0006629	lipid metabolic process	3.57328	1.82756e-05	0.000841672	12660	Chka
GO:0006629	lipid metabolic process	3.57328	1.82756e-05	0.000841672	171210	Acot2
GO:0006629	lipid metabolic process	3.57328	1.82756e-05	0.000841672	12894	Cpt1a
GO:0090023	positive regulation of neutrophil chemotaxis	19.8148	1.91368e-05	0.000865601	13614	Edn1
GO:0090023	positive regulation of neutrophil chemotaxis	19.8148	1.91368e-05	0.000865601	12261	C1qbp
GO:0090023	positive regulation of neutrophil chemotaxis	19.8148	1.91368e-05	0.000865601	16176	Il1b
GO:0090023	positive regulation of neutrophil chemotaxis	19.8148	1.91368e-05	0.000865601	16963	Xcl1
GO:0090023	positive regulation of neutrophil chemotaxis	19.8148	1.91368e-05	0.000865601	17242	Mdk
GO:0007283	spermatogenesis	3.90868	2.01399e-05	0.000894988	15081	H3f3b
GO:0007283	spermatogenesis	3.90868	2.01399e-05	0.000894988	12041	Bckdk
GO:0007283	spermatogenesis	3.90868	2.01399e-05	0.000894988	68981	Snrpa1
GO:0007283	spermatogenesis	3.90868	2.01399e-05	0.000894988	20681	Sox8
GO:0007283	spermatogenesis	3.90868	2.01399e-05	0.000894988	15512	Hspa2
GO:0007283	spermatogenesis	3.90868	2.01399e-05	0.000894988	20899	Stra8
GO:0007283	spermatogenesis	3.90868	2.01399e-05	0.000894988	78284	Creb3l4
GO:0007283	spermatogenesis	3.90868	2.01399e-05	0.000894988	20655	Sod1
GO:0007283	spermatogenesis	3.90868	2.01399e-05	0.000894988	71242	Spata24
GO:0007283	spermatogenesis	3.90868	2.01399e-05	0.000894988	53381	Prdx4
GO:0007283	spermatogenesis	3.90868	2.01399e-05	0.000894988	100009600	Zglp1
GO:0007283	spermatogenesis	3.90868	2.01399e-05	0.000894988	70873	Cnbd2
GO:0007283	spermatogenesis	3.90868	2.01399e-05	0.000894988	18476	Pafah1b3
GO:0007283	spermatogenesis	3.90868	2.01399e-05	0.000894988	246747	Adig
GO:0007283	spermatogenesis	3.90868	2.01399e-05	0.000894988	72504	Taf4b
GO:0007283	spermatogenesis	3.90868	2.01399e-05	0.000894988	328845	Acsbg2
GO:0002376	immune system process	3.70468	2.08763e-05	0.000903842	16365	Acod1
GO:0002376	immune system process	3.70468	2.08763e-05	0.000903842	100689	Spon2
GO:0002376	immune system process	3.70468	2.08763e-05	0.000903842	12477	Ctla4
GO:0002376	immune system process	3.70468	2.08763e-05	0.000903842	12261	C1qbp
GO:0002376	immune system process	3.70468	2.08763e-05	0.000903842	56743	Lat2
GO:0002376	immune system process	3.70468	2.08763e-05	0.000903842	332579	Card9
GO:0002376	immune system process	3.70468	2.08763e-05	0.000903842	269855	Ssc5d
GO:0002376	immune system process	3.70468	2.08763e-05	0.000903842	17089	Lyar
GO:0002376	immune system process	3.70468	2.08763e-05	0.000903842	16970	Lrmp
GO:0002376	immune system process	3.70468	2.08763e-05	0.000903842	432940	Otulin
GO:0002376	immune system process	3.70468	2.08763e-05	0.000903842	80876	Ifitm2
GO:0002376	immune system process	3.70468	2.08763e-05	0.000903842	66824	Pycard
GO:0002376	immune system process	3.70468	2.08763e-05	0.000903842	27103	Eif2ak4
GO:0002376	immune system process	3.70468	2.08763e-05	0.000903842	12478	Cd19
GO:0002376	immune system process	3.70468	2.08763e-05	0.000903842	216799	Nlrp3
GO:0002376	immune system process	3.70468	2.08763e-05	0.000903842	217303	Cd300a
GO:0002376	immune system process	3.70468	2.08763e-05	0.000903842	192231	Hexim1
GO:0042254	ribosome biogenesis	8.47525	2.10528e-05	0.000903842	64934	Pes1
GO:0042254	ribosome biogenesis	8.47525	2.10528e-05	0.000903842	68077	Nop53
GO:0042254	ribosome biogenesis	8.47525	2.10528e-05	0.000903842	68083	Pak1ip1
GO:0042254	ribosome biogenesis	8.47525	2.10528e-05	0.000903842	59014	Rrs1
GO:0042254	ribosome biogenesis	8.47525	2.10528e-05	0.000903842	68147	Gar1
GO:0042254	ribosome biogenesis	8.47525	2.10528e-05	0.000903842	12261	C1qbp
GO:0042254	ribosome biogenesis	8.47525	2.10528e-05	0.000903842	54127	Rps28
GO:0042254	ribosome biogenesis	8.47525	2.10528e-05	0.000903842	27176	Rpl7a
GO:0071222	cellular response to lipopolysaccharide	4.97674	2.81388e-05	0.00118793	16176	Il1b
GO:0071222	cellular response to lipopolysaccharide	4.97674	2.81388e-05	0.00118793	16365	Acod1
GO:0071222	cellular response to lipopolysaccharide	4.97674	2.81388e-05	0.00118793	100689	Spon2
GO:0071222	cellular response to lipopolysaccharide	4.97674	2.81388e-05	0.00118793	21929	Tnfaip3
GO:0071222	cellular response to lipopolysaccharide	4.97674	2.81388e-05	0.00118793	66824	Pycard
GO:0071222	cellular response to lipopolysaccharide	4.97674	2.81388e-05	0.00118793	109815	Selenos
GO:0071222	cellular response to lipopolysaccharide	4.97674	2.81388e-05	0.00118793	16160	Il12b
GO:0071222	cellular response to lipopolysaccharide	4.97674	2.81388e-05	0.00118793	14728	Lilrb4a
GO:0071222	cellular response to lipopolysaccharide	4.97674	2.81388e-05	0.00118793	16153	Il10
GO:0071222	cellular response to lipopolysaccharide	4.97674	2.81388e-05	0.00118793	20310	Cxcl2
GO:0071222	cellular response to lipopolysaccharide	4.97674	2.81388e-05	0.00118793	216799	Nlrp3
GO:0071222	cellular response to lipopolysaccharide	4.97674	2.81388e-05	0.00118793	12608	Cebpb
GO:0007623	circadian rhythm	9.72727	3.2972e-05	0.00136915	21847	Klf10
GO:0007623	circadian rhythm	9.72727	3.2972e-05	0.00136915	18626	Per1
GO:0007623	circadian rhythm	9.72727	3.2972e-05	0.00136915	18030	Nfil3
GO:0007623	circadian rhythm	9.72727	3.2972e-05	0.00136915	70118	Srrd
GO:0007623	circadian rhythm	9.72727	3.2972e-05	0.00136915	17777	Mttp
GO:0007623	circadian rhythm	9.72727	3.2972e-05	0.00136915	15902	Id2
GO:0007623	circadian rhythm	9.72727	3.2972e-05	0.00136915	20893	Bhlhe40
GO:0015031	protein transport	3.27903	3.38827e-05	0.00138427	17938	Naca
GO:0015031	protein transport	3.27903	3.38827e-05	0.00138427	67023	Use1
GO:0015031	protein transport	3.27903	3.38827e-05	0.00138427	18634	Pex7
GO:0015031	protein transport	3.27903	3.38827e-05	0.00138427	67015	Ccdc91
GO:0015031	protein transport	3.27903	3.38827e-05	0.00138427	80291	Rilpl2
GO:0015031	protein transport	3.27903	3.38827e-05	0.00138427	67952	Tomm20
GO:0015031	protein transport	3.27903	3.38827e-05	0.00138427	66169	Tomm7
GO:0015031	protein transport	3.27903	3.38827e-05	0.00138427	58222	Rab37
GO:0015031	protein transport	3.27903	3.38827e-05	0.00138427	30059	Timm10
GO:0015031	protein transport	3.27903	3.38827e-05	0.00138427	30055	Timm13
GO:0015031	protein transport	3.27903	3.38827e-05	0.00138427	50927	Nasp
GO:0015031	protein transport	3.27903	3.38827e-05	0.00138427	28084	Vps25
GO:0015031	protein transport	3.27903	3.38827e-05	0.00138427	226421	Rab7b
GO:0015031	protein transport	3.27903	3.38827e-05	0.00138427	110379	Sec13
GO:0015031	protein transport	3.27903	3.38827e-05	0.00138427	93835	Amn
GO:0015031	protein transport	3.27903	3.38827e-05	0.00138427	81500	Sil1
GO:0015031	protein transport	3.27903	3.38827e-05	0.00138427	227738	Lrsam1
GO:0015031	protein transport	3.27903	3.38827e-05	0.00138427	218490	Btf3
GO:0015031	protein transport	3.27903	3.38827e-05	0.00138427	170833	Hook2
GO:0043524	negative regulation of neuron apoptotic process	5.94444	3.50518e-05	0.00140931	12721	Coro1a
GO:0043524	negative regulation of neuron apoptotic process	5.94444	3.50518e-05	0.00140931	22340	Vegfb
GO:0043524	negative regulation of neuron apoptotic process	5.94444	3.50518e-05	0.00140931	20655	Sod1
GO:0043524	negative regulation of neuron apoptotic process	5.94444	3.50518e-05	0.00140931	18124	Nr4a3
GO:0043524	negative regulation of neuron apoptotic process	5.94444	3.50518e-05	0.00140931	12608	Cebpb
GO:0043524	negative regulation of neuron apoptotic process	5.94444	3.50518e-05	0.00140931	18227	Nr4a2
GO:0043524	negative regulation of neuron apoptotic process	5.94444	3.50518e-05	0.00140931	17242	Mdk
GO:0043524	negative regulation of neuron apoptotic process	5.94444	3.50518e-05	0.00140931	16153	Il10
GO:0043524	negative regulation of neuron apoptotic process	5.94444	3.50518e-05	0.00140931	12661	Chl1
GO:0043524	negative regulation of neuron apoptotic process	5.94444	3.50518e-05	0.00140931	11798	Xiap
GO:0006417	regulation of translation	6.6875	3.8314e-05	0.0015164	19652	Rbm3
GO:0006417	regulation of translation	6.6875	3.8314e-05	0.0015164	17872	Ppp1r15a
GO:0006417	regulation of translation	6.6875	3.8314e-05	0.0015164	14694	Rack1
GO:0006417	regulation of translation	6.6875	3.8314e-05	0.0015164	22121	Rpl13a
GO:0006417	regulation of translation	6.6875	3.8314e-05	0.0015164	212508	Mtg1
GO:0006417	regulation of translation	6.6875	3.8314e-05	0.0015164	110954	Rpl10
GO:0006417	regulation of translation	6.6875	3.8314e-05	0.0015164	27050	Rps3
GO:0006417	regulation of translation	6.6875	3.8314e-05	0.0015164	27103	Eif2ak4
GO:0006417	regulation of translation	6.6875	3.8314e-05	0.0015164	17149	Magoh
GO:0045665	negative regulation of neuron differentiation	9.48101	3.91092e-05	0.00152405	223227	Sox21
GO:0045665	negative regulation of neuron differentiation	9.48101	3.91092e-05	0.00152405	18508	Pax6
GO:0045665	negative regulation of neuron differentiation	9.48101	3.91092e-05	0.00152405	16176	Il1b
GO:0045665	negative regulation of neuron differentiation	9.48101	3.91092e-05	0.00152405	11785	Apbb1
GO:0045665	negative regulation of neuron differentiation	9.48101	3.91092e-05	0.00152405	19716	Bex1
GO:0045665	negative regulation of neuron differentiation	9.48101	3.91092e-05	0.00152405	15902	Id2
GO:0045665	negative regulation of neuron differentiation	9.48101	3.91092e-05	0.00152405	27103	Eif2ak4
GO:0006631	fatty acid metabolic process	5.75269	4.6675e-05	0.00179133	11370	Acadvl
GO:0006631	fatty acid metabolic process	5.75269	4.6675e-05	0.00179133	19225	Ptgs2
GO:0006631	fatty acid metabolic process	5.75269	4.6675e-05	0.00179133	171210	Acot2
GO:0006631	fatty acid metabolic process	5.75269	4.6675e-05	0.00179133	52538	Acaa2
GO:0006631	fatty acid metabolic process	5.75269	4.6675e-05	0.00179133	68631	Cryl1
GO:0006631	fatty acid metabolic process	5.75269	4.6675e-05	0.00179133	328845	Acsbg2
GO:0006631	fatty acid metabolic process	5.75269	4.6675e-05	0.00179133	12894	Cpt1a
GO:0006631	fatty acid metabolic process	5.75269	4.6675e-05	0.00179133	14979	H2-Ke6
GO:0006631	fatty acid metabolic process	5.75269	4.6675e-05	0.00179133	257633	Acsf3
GO:0006631	fatty acid metabolic process	5.75269	4.6675e-05	0.00179133	13076	Cyp1a1
GO:0002098	tRNA wobble uridine modification	26.75	5.03491e-05	0.0019035	105638	Dph3
GO:0002098	tRNA wobble uridine modification	26.75	5.03491e-05	0.0019035	74195	Elp3
GO:0002098	tRNA wobble uridine modification	26.75	5.03491e-05	0.0019035	77766	Elp4
GO:0002098	tRNA wobble uridine modification	26.75	5.03491e-05	0.0019035	68205	Urm1
GO:0035335	peptidyl-tyrosine dephosphorylation	15.7353	6.24901e-05	0.00227145	19252	Dusp1
GO:0035335	peptidyl-tyrosine dephosphorylation	15.7353	6.24901e-05	0.00227145	240672	Dusp5
GO:0035335	peptidyl-tyrosine dephosphorylation	15.7353	6.24901e-05	0.00227145	63953	Dusp10
GO:0035335	peptidyl-tyrosine dephosphorylation	15.7353	6.24901e-05	0.00227145	19277	Ptpro
GO:0035335	peptidyl-tyrosine dephosphorylation	15.7353	6.24901e-05	0.00227145	19253	Ptpn18
GO:0032792	negative regulation of CREB transcription factor activity	53.5	6.36687e-05	0.00227145	17691	Sik1
GO:0032792	negative regulation of CREB transcription factor activity	53.5	6.36687e-05	0.00227145	27103	Eif2ak4
GO:0032792	negative regulation of CREB transcription factor activity	53.5	6.36687e-05	0.00227145	13198	Ddit3
GO:1901798	positive regulation of signal transduction by p53 class mediator	53.5	6.36687e-05	0.00227145	67025	Rpl11
GO:1901798	positive regulation of signal transduction by p53 class mediator	53.5	6.36687e-05	0.00227145	192231	Hexim1
GO:1901798	positive regulation of signal transduction by p53 class mediator	53.5	6.36687e-05	0.00227145	65019	Rpl23
GO:1903208	negative regulation of hydrogen peroxide-induced neuron death	53.5	6.36687e-05	0.00227145	16153	Il10
GO:1903208	negative regulation of hydrogen peroxide-induced neuron death	53.5	6.36687e-05	0.00227145	18124	Nr4a3
GO:1903208	negative regulation of hydrogen peroxide-induced neuron death	53.5	6.36687e-05	0.00227145	14694	Rack1
GO:0000028	ribosomal small subunit assembly	25.1765	6.53535e-05	0.00229917	54127	Rps28
GO:0000028	ribosomal small subunit assembly	25.1765	6.53535e-05	0.00229917	57294	Rps27
GO:0000028	ribosomal small subunit assembly	25.1765	6.53535e-05	0.00229917	20085	Rps19
GO:0000028	ribosomal small subunit assembly	25.1765	6.53535e-05	0.00229917	75617	Rps25
GO:0046330	positive regulation of JNK cascade	8.7093	6.85211e-05	0.00237759	332579	Card9
GO:0046330	positive regulation of JNK cascade	8.7093	6.85211e-05	0.00237759	52521	Zfp622
GO:0046330	positive regulation of JNK cascade	8.7093	6.85211e-05	0.00237759	13197	Gadd45a
GO:0046330	positive regulation of JNK cascade	8.7093	6.85211e-05	0.00237759	23882	Gadd45g
GO:0046330	positive regulation of JNK cascade	8.7093	6.85211e-05	0.00237759	66824	Pycard
GO:0046330	positive regulation of JNK cascade	8.7093	6.85211e-05	0.00237759	16176	Il1b
GO:0046330	positive regulation of JNK cascade	8.7093	6.85211e-05	0.00237759	17873	Gadd45b
GO:0006974	cellular response to DNA damage stimulus	3.5299	7.07839e-05	0.00242291	11785	Apbb1
GO:0006974	cellular response to DNA damage stimulus	3.5299	7.07839e-05	0.00242291	13197	Gadd45a
GO:0006974	cellular response to DNA damage stimulus	3.5299	7.07839e-05	0.00242291	232210	Hmces
GO:0006974	cellular response to DNA damage stimulus	3.5299	7.07839e-05	0.00242291	27050	Rps3
GO:0006974	cellular response to DNA damage stimulus	3.5299	7.07839e-05	0.00242291	268395	Mpg
GO:0006974	cellular response to DNA damage stimulus	3.5299	7.07839e-05	0.00242291	12477	Ctla4
GO:0006974	cellular response to DNA damage stimulus	3.5299	7.07839e-05	0.00242291	244694	Kdm4d
GO:0006974	cellular response to DNA damage stimulus	3.5299	7.07839e-05	0.00242291	28135	Cep63
GO:0006974	cellular response to DNA damage stimulus	3.5299	7.07839e-05	0.00242291	17314	Mgmt
GO:0006974	cellular response to DNA damage stimulus	3.5299	7.07839e-05	0.00242291	51812	Mcrs1
GO:0006974	cellular response to DNA damage stimulus	3.5299	7.07839e-05	0.00242291	68077	Nop53
GO:0006974	cellular response to DNA damage stimulus	3.5299	7.07839e-05	0.00242291	110749	Chaf1b
GO:0006974	cellular response to DNA damage stimulus	3.5299	7.07839e-05	0.00242291	72774	Neil1
GO:0006974	cellular response to DNA damage stimulus	3.5299	7.07839e-05	0.00242291	14156	Fen1
GO:0006974	cellular response to DNA damage stimulus	3.5299	7.07839e-05	0.00242291	69747	Zswim7
GO:0006974	cellular response to DNA damage stimulus	3.5299	7.07839e-05	0.00242291	272158	Poln
GO:0032543	mitochondrial translation	15.2857	7.2345e-05	0.00244333	19935	Mrpl23
GO:0032543	mitochondrial translation	15.2857	7.2345e-05	0.00244333	64659	Mrps14
GO:0032543	mitochondrial translation	15.2857	7.2345e-05	0.00244333	66242	Mrps16
GO:0032543	mitochondrial translation	15.2857	7.2345e-05	0.00244333	66416	Ndufa7
GO:0032543	mitochondrial translation	15.2857	7.2345e-05	0.00244333	68836	Mrpl52
GO:0045595	regulation of cell differentiation	14.0789	0.000109302	0.0036429	16600	Klf4
GO:0045595	regulation of cell differentiation	14.0789	0.000109302	0.0036429	17691	Sik1
GO:0045595	regulation of cell differentiation	14.0789	0.000109302	0.0036429	12702	Socs3
GO:0045595	regulation of cell differentiation	14.0789	0.000109302	0.0036429	12608	Cebpb
GO:0045595	regulation of cell differentiation	14.0789	0.000109302	0.0036429	24064	Spry2
GO:0006508	proteolysis	3.37008	0.000123513	0.00406309	19011	Endou
GO:0006508	proteolysis	3.37008	0.000123513	0.00406309	16147	Ihh
GO:0006508	proteolysis	3.37008	0.000123513	0.00406309	13036	Ctsh
GO:0006508	proteolysis	3.37008	0.000123513	0.00406309	73902	Psmb11
GO:0006508	proteolysis	3.37008	0.000123513	0.00406309	21929	Tnfaip3
GO:0006508	proteolysis	3.37008	0.000123513	0.00406309	217140	Scrn2
GO:0006508	proteolysis	3.37008	0.000123513	0.00406309	76223	Agbl3
GO:0006508	proteolysis	3.37008	0.000123513	0.00406309	259277	Klk8
GO:0006508	proteolysis	3.37008	0.000123513	0.00406309	66824	Pycard
GO:0006508	proteolysis	3.37008	0.000123513	0.00406309	19172	Psmb4
GO:0006508	proteolysis	3.37008	0.000123513	0.00406309	18675	Phex
GO:0006508	proteolysis	3.37008	0.000123513	0.00406309	432940	Otulin
GO:0006508	proteolysis	3.37008	0.000123513	0.00406309	232210	Hmces
GO:0006508	proteolysis	3.37008	0.000123513	0.00406309	17381	Mmp12
GO:0006508	proteolysis	3.37008	0.000123513	0.00406309	433466	Jmjd7
GO:0006508	proteolysis	3.37008	0.000123513	0.00406309	330723	Htra4
GO:0050873	brown fat cell differentiation	13.375	0.000141095	0.00458197	71660	Rarres2
GO:0050873	brown fat cell differentiation	13.375	0.000141095	0.00458197	12608	Cebpb
GO:0050873	brown fat cell differentiation	13.375	0.000141095	0.00458197	107221	Ffar4
GO:0050873	brown fat cell differentiation	13.375	0.000141095	0.00458197	246747	Adig
GO:0050873	brown fat cell differentiation	13.375	0.000141095	0.00458197	19225	Ptgs2
GO:0042102	positive regulation of T cell proliferation	9.72727	0.000147192	0.00463553	80795	Selenok
GO:0042102	positive regulation of T cell proliferation	9.72727	0.000147192	0.00463553	16176	Il1b
GO:0042102	positive regulation of T cell proliferation	9.72727	0.000147192	0.00463553	16160	Il12b
GO:0042102	positive regulation of T cell proliferation	9.72727	0.000147192	0.00463553	547431	Btnl2
GO:0042102	positive regulation of T cell proliferation	9.72727	0.000147192	0.00463553	12721	Coro1a
GO:0042102	positive regulation of T cell proliferation	9.72727	0.000147192	0.00463553	330817	Dhps
GO:0042752	regulation of circadian rhythm	9.72727	0.000147192	0.00463553	21847	Klf10
GO:0042752	regulation of circadian rhythm	9.72727	0.000147192	0.00463553	15902	Id2
GO:0042752	regulation of circadian rhythm	9.72727	0.000147192	0.00463553	20893	Bhlhe40
GO:0042752	regulation of circadian rhythm	9.72727	0.000147192	0.00463553	20439	Siah2
GO:0042752	regulation of circadian rhythm	9.72727	0.000147192	0.00463553	70118	Srrd
GO:0042752	regulation of circadian rhythm	9.72727	0.000147192	0.00463553	18626	Per1
GO:0071346	cellular response to interferon-gamma	7.72165	0.000149952	0.00463553	22121	Rpl13a
GO:0071346	cellular response to interferon-gamma	7.72165	0.000149952	0.00463553	55943	Stx8
GO:0071346	cellular response to interferon-gamma	7.72165	0.000149952	0.00463553	16365	Acod1
GO:0071346	cellular response to interferon-gamma	7.72165	0.000149952	0.00463553	226421	Rab7b
GO:0071346	cellular response to interferon-gamma	7.72165	0.000149952	0.00463553	16963	Xcl1
GO:0071346	cellular response to interferon-gamma	7.72165	0.000149952	0.00463553	20303	Ccl4
GO:0071346	cellular response to interferon-gamma	7.72165	0.000149952	0.00463553	16160	Il12b
GO:0007204	positive regulation of cytosolic calcium ion concentration	5.63158	0.000150064	0.00463553	54199	Ccrl2
GO:0007204	positive regulation of cytosolic calcium ion concentration	5.63158	0.000150064	0.00463553	16176	Il1b
GO:0007204	positive regulation of cytosolic calcium ion concentration	5.63158	0.000150064	0.00463553	93670	Tac4
GO:0007204	positive regulation of cytosolic calcium ion concentration	5.63158	0.000150064	0.00463553	107221	Ffar4
GO:0007204	positive regulation of cytosolic calcium ion concentration	5.63158	0.000150064	0.00463553	13614	Edn1
GO:0007204	positive regulation of cytosolic calcium ion concentration	5.63158	0.000150064	0.00463553	20310	Cxcl2
GO:0007204	positive regulation of cytosolic calcium ion concentration	5.63158	0.000150064	0.00463553	22064	Trpc2
GO:0007204	positive regulation of cytosolic calcium ion concentration	5.63158	0.000150064	0.00463553	110312	Pmch
GO:0007204	positive regulation of cytosolic calcium ion concentration	5.63158	0.000150064	0.00463553	59091	Jph2
GO:0061469	regulation of type B pancreatic cell proliferation	40.125	0.000175797	0.00536498	15370	Nr4a1
GO:0061469	regulation of type B pancreatic cell proliferation	40.125	0.000175797	0.00536498	18124	Nr4a3
GO:0061469	regulation of type B pancreatic cell proliferation	40.125	0.000175797	0.00536498	66117	Fmc1
GO:0006754	ATP biosynthetic process	19.4545	0.000193544	0.00583627	11949	Atp5c1
GO:0006754	ATP biosynthetic process	19.4545	0.000193544	0.00583627	57423	Atp5j2
GO:0006754	ATP biosynthetic process	19.4545	0.000193544	0.00583627	67126	Atp5e
GO:0006754	ATP biosynthetic process	19.4545	0.000193544	0.00583627	27425	Atp5l
GO:0001764	neuron migration	6.2029	0.000204405	0.00609126	11785	Apbb1
GO:0001764	neuron migration	6.2029	0.000204405	0.00609126	18508	Pax6
GO:0001764	neuron migration	6.2029	0.000204405	0.00609126	12661	Chl1
GO:0001764	neuron migration	6.2029	0.000204405	0.00609126	12569	Cdk5r1
GO:0001764	neuron migration	6.2029	0.000204405	0.00609126	18227	Nr4a2
GO:0001764	neuron migration	6.2029	0.000204405	0.00609126	18634	Pex7
GO:0001764	neuron migration	6.2029	0.000204405	0.00609126	74195	Elp3
GO:0001764	neuron migration	6.2029	0.000204405	0.00609126	107934	Celsr3
GO:0045787	positive regulation of cell cycle	12.1591	0.000225807	0.00651273	18124	Nr4a3
GO:0045787	positive regulation of cell cycle	12.1591	0.000225807	0.00651273	16153	Il10
GO:0045787	positive regulation of cell cycle	12.1591	0.000225807	0.00651273	15902	Id2
GO:0045787	positive regulation of cell cycle	12.1591	0.000225807	0.00651273	80748	BC004004
GO:0045787	positive regulation of cell cycle	12.1591	0.000225807	0.00651273	267019	Rps15a
GO:1902895	positive regulation of pri-miRNA transcription by RNA polymerase II	12.1591	0.000225807	0.00651273	16600	Klf4
GO:1902895	positive regulation of pri-miRNA transcription by RNA polymerase II	12.1591	0.000225807	0.00651273	14281	Fos
GO:1902895	positive regulation of pri-miRNA transcription by RNA polymerase II	12.1591	0.000225807	0.00651273	16153	Il10
GO:1902895	positive regulation of pri-miRNA transcription by RNA polymerase II	12.1591	0.000225807	0.00651273	13653	Egr1
GO:1902895	positive regulation of pri-miRNA transcription by RNA polymerase II	12.1591	0.000225807	0.00651273	14815	Nr3c1
GO:0016567	protein ubiquitination	4.02508	0.000226261	0.00651273	80794	Cblc
GO:0016567	protein ubiquitination	4.02508	0.000226261	0.00651273	78309	Cul9
GO:0016567	protein ubiquitination	4.02508	0.000226261	0.00651273	66381	Rnf113a2
GO:0016567	protein ubiquitination	4.02508	0.000226261	0.00651273	207742	Rnf43
GO:0016567	protein ubiquitination	4.02508	0.000226261	0.00651273	101700	Trim68
GO:0016567	protein ubiquitination	4.02508	0.000226261	0.00651273	14694	Rack1
GO:0016567	protein ubiquitination	4.02508	0.000226261	0.00651273	22190	Ubc
GO:0016567	protein ubiquitination	4.02508	0.000226261	0.00651273	56771	Med20
GO:0016567	protein ubiquitination	4.02508	0.000226261	0.00651273	22187	Ubb
GO:0016567	protein ubiquitination	4.02508	0.000226261	0.00651273	434246	Trim72
GO:0016567	protein ubiquitination	4.02508	0.000226261	0.00651273	78294	Rps27a
GO:0016567	protein ubiquitination	4.02508	0.000226261	0.00651273	21929	Tnfaip3
GO:0043407	negative regulation of MAP kinase activity	11.8889	0.000252085	0.00717452	16176	Il1b
GO:0043407	negative regulation of MAP kinase activity	11.8889	0.000252085	0.00717452	24064	Spry2
GO:0043407	negative regulation of MAP kinase activity	11.8889	0.000252085	0.00717452	19252	Dusp1
GO:0043407	negative regulation of MAP kinase activity	11.8889	0.000252085	0.00717452	217303	Cd300a
GO:0043407	negative regulation of MAP kinase activity	11.8889	0.000252085	0.00717452	80794	Cblc
GO:0019941	modification-dependent protein catabolic process	35.6667	0.000261859	0.00736988	78294	Rps27a
GO:0019941	modification-dependent protein catabolic process	35.6667	0.000261859	0.00736988	22190	Ubc
GO:0019941	modification-dependent protein catabolic process	35.6667	0.000261859	0.00736988	22187	Ubb
GO:0016311	dephosphorylation	6.93519	0.000297962	0.00829382	19252	Dusp1
GO:0016311	dephosphorylation	6.93519	0.000297962	0.00829382	11647	Alpl
GO:0016311	dephosphorylation	6.93519	0.000297962	0.00829382	240672	Dusp5
GO:0016311	dephosphorylation	6.93519	0.000297962	0.00829382	218232	Ptpdc1
GO:0016311	dephosphorylation	6.93519	0.000297962	0.00829382	63953	Dusp10
GO:0016311	dephosphorylation	6.93519	0.000297962	0.00829382	19277	Ptpro
GO:0016311	dephosphorylation	6.93519	0.000297962	0.00829382	19253	Ptpn18
GO:0006955	immune response	3.61299	0.000336221	0.00871261	12477	Ctla4
GO:0006955	immune response	3.61299	0.000336221	0.00871261	640340	Igkv8-16
GO:0006955	immune response	3.61299	0.000336221	0.00871261	16963	Xcl1
GO:0006955	immune response	3.61299	0.000336221	0.00871261	16176	Il1b
GO:0006955	immune response	3.61299	0.000336221	0.00871261	18030	Nfil3
GO:0006955	immune response	3.61299	0.000336221	0.00871261	628571	Igkv4-63
GO:0006955	immune response	3.61299	0.000336221	0.00871261	19011	Endou
GO:0006955	immune response	3.61299	0.000336221	0.00871261	20310	Cxcl2
GO:0006955	immune response	3.61299	0.000336221	0.00871261	226866	Sbspon
GO:0006955	immune response	3.61299	0.000336221	0.00871261	379043	Raet1e
GO:0006955	immune response	3.61299	0.000336221	0.00871261	54199	Ccrl2
GO:0006955	immune response	3.61299	0.000336221	0.00871261	20303	Ccl4
GO:0006955	immune response	3.61299	0.000336221	0.00871261	16153	Il10
GO:0006879	cellular iron ion homeostasis	11.1458	0.00034524	0.00871261	66162	Bola2
GO:0006879	cellular iron ion homeostasis	11.1458	0.00034524	0.00871261	30060	Meltf
GO:0006879	cellular iron ion homeostasis	11.1458	0.00034524	0.00871261	26425	Nubp1
GO:0006879	cellular iron ion homeostasis	11.1458	0.00034524	0.00871261	20655	Sod1
GO:0006879	cellular iron ion homeostasis	11.1458	0.00034524	0.00871261	65113	Ndfip1
GO:0048477	oogenesis	11.1458	0.00034524	0.00871261	17242	Mdk
GO:0048477	oogenesis	11.1458	0.00034524	0.00871261	20899	Stra8
GO:0048477	oogenesis	11.1458	0.00034524	0.00871261	100009600	Zglp1
GO:0048477	oogenesis	11.1458	0.00034524	0.00871261	72504	Taf4b
GO:0048477	oogenesis	11.1458	0.00034524	0.00871261	15081	H3f3b
GO:0002764	immune response-regulating signaling pathway	107	0.000348869	0.00871261	13036	Ctsh
GO:0002764	immune response-regulating signaling pathway	107	0.000348869	0.00871261	56743	Lat2
GO:0006850	mitochondrial pyruvate transmembrane transport	107	0.000348869	0.00871261	70456	Mpc2
GO:0006850	mitochondrial pyruvate transmembrane transport	107	0.000348869	0.00871261	55951	Mpc1
GO:0048021	regulation of melanin biosynthetic process	107	0.000348869	0.00871261	317750	Slc24a5
GO:0048021	regulation of melanin biosynthetic process	107	0.000348869	0.00871261	26570	Slc7a11
GO:0051343	positive regulation of cyclic-nucleotide phosphodiesterase activity	107	0.000348869	0.00871261	14685	Gnat1
GO:0051343	positive regulation of cyclic-nucleotide phosphodiesterase activity	107	0.000348869	0.00871261	14694	Rack1
GO:0072573	tolerance induction to lipopolysaccharide	107	0.000348869	0.00871261	21929	Tnfaip3
GO:0072573	tolerance induction to lipopolysaccharide	107	0.000348869	0.00871261	16365	Acod1
GO:0051092	positive regulation of NF-kappaB transcription factor activity	5.74497	0.000350626	0.00871261	66824	Pycard
GO:0051092	positive regulation of NF-kappaB transcription factor activity	5.74497	0.000350626	0.00871261	226421	Rab7b
GO:0051092	positive regulation of NF-kappaB transcription factor activity	5.74497	0.000350626	0.00871261	27050	Rps3
GO:0051092	positive regulation of NF-kappaB transcription factor activity	5.74497	0.000350626	0.00871261	16176	Il1b
GO:0051092	positive regulation of NF-kappaB transcription factor activity	5.74497	0.000350626	0.00871261	101700	Trim68
GO:0051092	positive regulation of NF-kappaB transcription factor activity	5.74497	0.000350626	0.00871261	216799	Nlrp3
GO:0051092	positive regulation of NF-kappaB transcription factor activity	5.74497	0.000350626	0.00871261	332579	Card9
GO:0051092	positive regulation of NF-kappaB transcription factor activity	5.74497	0.000350626	0.00871261	69159	Rhebl1
GO:0034976	response to endoplasmic reticulum stress	8.33766	0.000352173	0.00871261	66155	Ufc1
GO:0034976	response to endoplasmic reticulum stress	8.33766	0.000352173	0.00871261	13198	Ddit3
GO:0034976	response to endoplasmic reticulum stress	8.33766	0.000352173	0.00871261	27103	Eif2ak4
GO:0034976	response to endoplasmic reticulum stress	8.33766	0.000352173	0.00871261	12608	Cebpb
GO:0034976	response to endoplasmic reticulum stress	8.33766	0.000352173	0.00871261	14828	Hspa5
GO:0034976	response to endoplasmic reticulum stress	8.33766	0.000352173	0.00871261	17872	Ppp1r15a
GO:0071356	cellular response to tumor necrosis factor	6.74775	0.000354308	0.00871261	27050	Rps3
GO:0071356	cellular response to tumor necrosis factor	6.74775	0.000354308	0.00871261	16963	Xcl1
GO:0071356	cellular response to tumor necrosis factor	6.74775	0.000354308	0.00871261	18035	Nfkbia
GO:0071356	cellular response to tumor necrosis factor	6.74775	0.000354308	0.00871261	77626	Smpd4
GO:0071356	cellular response to tumor necrosis factor	6.74775	0.000354308	0.00871261	20303	Ccl4
GO:0071356	cellular response to tumor necrosis factor	6.74775	0.000354308	0.00871261	66824	Pycard
GO:0071356	cellular response to tumor necrosis factor	6.74775	0.000354308	0.00871261	16365	Acod1
GO:0000185	activation of MAPKKK activity	32.1	0.000371481	0.00871261	23882	Gadd45g
GO:0000185	activation of MAPKKK activity	32.1	0.000371481	0.00871261	17873	Gadd45b
GO:0000185	activation of MAPKKK activity	32.1	0.000371481	0.00871261	13197	Gadd45a
GO:0006122	mitochondrial electron transport, ubiquinol to cytochrome c	32.1	0.000371481	0.00871261	66445	Cyc1
GO:0006122	mitochondrial electron transport, ubiquinol to cytochrome c	32.1	0.000371481	0.00871261	22272	Uqcrq
GO:0006122	mitochondrial electron transport, ubiquinol to cytochrome c	32.1	0.000371481	0.00871261	66694	Uqcrfs1
GO:0006123	mitochondrial electron transport, cytochrome c to oxygen	32.1	0.000371481	0.00871261	12857	Cox4i1
GO:0006123	mitochondrial electron transport, cytochrome c to oxygen	32.1	0.000371481	0.00871261	12861	Cox6a1
GO:0006123	mitochondrial electron transport, cytochrome c to oxygen	32.1	0.000371481	0.00871261	84682	Cox4i2
GO:0045654	positive regulation of megakaryocyte differentiation	32.1	0.000371481	0.00871261	226421	Rab7b
GO:0045654	positive regulation of megakaryocyte differentiation	32.1	0.000371481	0.00871261	68235	Mturn
GO:0045654	positive regulation of megakaryocyte differentiation	32.1	0.000371481	0.00871261	66193	Pithd1
GO:0045717	negative regulation of fatty acid biosynthetic process	32.1	0.000371481	0.00871261	230796	Wdtc1
GO:0045717	negative regulation of fatty acid biosynthetic process	32.1	0.000371481	0.00871261	231070	Insig1
GO:0045717	negative regulation of fatty acid biosynthetic process	32.1	0.000371481	0.00871261	11370	Acadvl
GO:1990253	cellular response to leucine starvation	32.1	0.000371481	0.00871261	27103	Eif2ak4
GO:1990253	cellular response to leucine starvation	32.1	0.000371481	0.00871261	107045	Lars
GO:1990253	cellular response to leucine starvation	32.1	0.000371481	0.00871261	52187	Rragd
GO:0001649	osteoblast differentiation	8.23077	0.000378527	0.00879641	13877	Erh
GO:0001649	osteoblast differentiation	8.23077	0.000378527	0.00879641	15081	H3f3b
GO:0001649	osteoblast differentiation	8.23077	0.000378527	0.00879641	80707	Wwox
GO:0001649	osteoblast differentiation	8.23077	0.000378527	0.00879641	16477	Junb
GO:0001649	osteoblast differentiation	8.23077	0.000378527	0.00879641	16147	Ihh
GO:0001649	osteoblast differentiation	8.23077	0.000378527	0.00879641	20681	Sox8
GO:0001934	positive regulation of protein phosphorylation	4.45833	0.000403616	0.00927452	28106	Mydgf
GO:0001934	positive regulation of protein phosphorylation	4.45833	0.000403616	0.00927452	22340	Vegfb
GO:0001934	positive regulation of protein phosphorylation	4.45833	0.000403616	0.00927452	18793	Plaur
GO:0001934	positive regulation of protein phosphorylation	4.45833	0.000403616	0.00927452	71660	Rarres2
GO:0001934	positive regulation of protein phosphorylation	4.45833	0.000403616	0.00927452	14171	Fgf17
GO:0001934	positive regulation of protein phosphorylation	4.45833	0.000403616	0.00927452	64654	Fgf23
GO:0001934	positive regulation of protein phosphorylation	4.45833	0.000403616	0.00927452	15512	Hspa2
GO:0001934	positive regulation of protein phosphorylation	4.45833	0.000403616	0.00927452	14694	Rack1
GO:0001934	positive regulation of protein phosphorylation	4.45833	0.000403616	0.00927452	16176	Il1b
GO:0001934	positive regulation of protein phosphorylation	4.45833	0.000403616	0.00927452	27103	Eif2ak4
GO:0070373	negative regulation of ERK1 and ERK2 cascade	8.12658	0.000406424	0.00927452	66259	Camk2n1
GO:0070373	negative regulation of ERK1 and ERK2 cascade	8.12658	0.000406424	0.00927452	16600	Klf4
GO:0070373	negative regulation of ERK1 and ERK2 cascade	8.12658	0.000406424	0.00927452	24064	Spry2
GO:0070373	negative regulation of ERK1 and ERK2 cascade	8.12658	0.000406424	0.00927452	11910	Atf3
GO:0070373	negative regulation of ERK1 and ERK2 cascade	8.12658	0.000406424	0.00927452	63953	Dusp10
GO:0070373	negative regulation of ERK1 and ERK2 cascade	8.12658	0.000406424	0.00927452	19252	Dusp1
GO:0009636	response to toxic substance	10.7	0.000420673	0.00951397	20303	Ccl4
GO:0009636	response to toxic substance	10.7	0.000420673	0.00951397	13076	Cyp1a1
GO:0009636	response to toxic substance	10.7	0.000420673	0.00951397	14400	Gabrb1
GO:0009636	response to toxic substance	10.7	0.000420673	0.00951397	26570	Slc7a11
GO:0009636	response to toxic substance	10.7	0.000420673	0.00951397	20522	Slc23a1
GO:0048661	positive regulation of smooth muscle cell proliferation	8.025	0.00043593	0.00977178	17420	Mnat1
GO:0048661	positive regulation of smooth muscle cell proliferation	8.025	0.00043593	0.00977178	15902	Id2
GO:0048661	positive regulation of smooth muscle cell proliferation	8.025	0.00043593	0.00977178	19225	Ptgs2
GO:0048661	positive regulation of smooth muscle cell proliferation	8.025	0.00043593	0.00977178	13614	Edn1
GO:0048661	positive regulation of smooth muscle cell proliferation	8.025	0.00043593	0.00977178	18124	Nr4a3
GO:0048661	positive regulation of smooth muscle cell proliferation	8.025	0.00043593	0.00977178	13653	Egr1
GO:0006979	response to oxidative stress	6.4569	0.000467306	0.0102929	69665	Upk3bl
GO:0006979	response to oxidative stress	6.4569	0.000467306	0.0102929	80795	Selenok
GO:0006979	response to oxidative stress	6.4569	0.000467306	0.0102929	19225	Ptgs2
GO:0006979	response to oxidative stress	6.4569	0.000467306	0.0102929	72774	Neil1
GO:0006979	response to oxidative stress	6.4569	0.000467306	0.0102929	67130	Ndufa6
GO:0006979	response to oxidative stress	6.4569	0.000467306	0.0102929	53381	Prdx4
GO:0006979	response to oxidative stress	6.4569	0.000467306	0.0102929	20655	Sod1
GO:0050829	defense response to Gram-negative bacterium	6.4569	0.000467306	0.0102929	71660	Rarres2
GO:0050829	defense response to Gram-negative bacterium	6.4569	0.000467306	0.0102929	17105	Lyz2
GO:0050829	defense response to Gram-negative bacterium	6.4569	0.000467306	0.0102929	16160	Il12b
GO:0050829	defense response to Gram-negative bacterium	6.4569	0.000467306	0.0102929	269855	Ssc5d
GO:0050829	defense response to Gram-negative bacterium	6.4569	0.000467306	0.0102929	66824	Pycard
GO:0050829	defense response to Gram-negative bacterium	6.4569	0.000467306	0.0102929	19946	Rpl30
GO:0050829	defense response to Gram-negative bacterium	6.4569	0.000467306	0.0102929	20085	Rps19
GO:0006983	ER overload response	29.1818	0.000507233	0.0108883	14828	Hspa5
GO:0006983	ER overload response	29.1818	0.000507233	0.0108883	109815	Selenos
GO:0006983	ER overload response	29.1818	0.000507233	0.0108883	13198	Ddit3
GO:0034115	negative regulation of heterotypic cell-cell adhesion	29.1818	0.000507233	0.0108883	21929	Tnfaip3
GO:0034115	negative regulation of heterotypic cell-cell adhesion	29.1818	0.000507233	0.0108883	16600	Klf4
GO:0034115	negative regulation of heterotypic cell-cell adhesion	29.1818	0.000507233	0.0108883	16153	Il10
GO:1990440	positive regulation of transcription from RNA polymerase II promoter in response to endoplasmic reticulum stress	29.1818	0.000507233	0.0108883	11910	Atf3
GO:1990440	positive regulation of transcription from RNA polymerase II promoter in response to endoplasmic reticulum stress	29.1818	0.000507233	0.0108883	12608	Cebpb
GO:1990440	positive regulation of transcription from RNA polymerase II promoter in response to endoplasmic reticulum stress	29.1818	0.000507233	0.0108883	13198	Ddit3
GO:1900745	positive regulation of p38MAPK cascade	15.2857	0.000518166	0.0110295	13197	Gadd45a
GO:1900745	positive regulation of p38MAPK cascade	15.2857	0.000518166	0.0110295	23882	Gadd45g
GO:1900745	positive regulation of p38MAPK cascade	15.2857	0.000518166	0.0110295	17873	Gadd45b
GO:1900745	positive regulation of p38MAPK cascade	15.2857	0.000518166	0.0110295	16176	Il1b
GO:0001666	response to hypoxia	6.19008	0.000607952	0.0128329	18227	Nr4a2
GO:0001666	response to hypoxia	6.19008	0.000607952	0.0128329	13614	Edn1
GO:0001666	response to hypoxia	6.19008	0.000607952	0.0128329	22340	Vegfb
GO:0001666	response to hypoxia	6.19008	0.000607952	0.0128329	13653	Egr1
GO:0001666	response to hypoxia	6.19008	0.000607952	0.0128329	171210	Acot2
GO:0001666	response to hypoxia	6.19008	0.000607952	0.0128329	19309	Pygm
GO:0001666	response to hypoxia	6.19008	0.000607952	0.0128329	14284	Fosl2
GO:0042060	wound healing	7.46512	0.000650581	0.0135015	15442	Hpse
GO:0042060	wound healing	7.46512	0.000650581	0.0135015	17938	Naca
GO:0042060	wound healing	7.46512	0.000650581	0.0135015	80748	BC004004
GO:0042060	wound healing	7.46512	0.000650581	0.0135015	17381	Mmp12
GO:0042060	wound healing	7.46512	0.000650581	0.0135015	20969	Sdc1
GO:0042060	wound healing	7.46512	0.000650581	0.0135015	14027	Evpl
GO:0043280	positive regulation of cysteine-type endopeptidase activity involved in apoptotic process	9.72727	0.000664672	0.0135015	66824	Pycard
GO:0043280	positive regulation of cysteine-type endopeptidase activity involved in apoptotic process	9.72727	0.000664672	0.0135015	56330	Pdcd5
GO:0043280	positive regulation of cysteine-type endopeptidase activity involved in apoptotic process	9.72727	0.000664672	0.0135015	216799	Nlrp3
GO:0043280	positive regulation of cysteine-type endopeptidase activity involved in apoptotic process	9.72727	0.000664672	0.0135015	72565	Uaca
GO:0043280	positive regulation of cysteine-type endopeptidase activity involved in apoptotic process	9.72727	0.000664672	0.0135015	332579	Card9
GO:0002237	response to molecule of bacterial origin	26.75	0.000671609	0.0135015	21929	Tnfaip3
GO:0002237	response to molecule of bacterial origin	26.75	0.000671609	0.0135015	16153	Il10
GO:0002237	response to molecule of bacterial origin	26.75	0.000671609	0.0135015	20310	Cxcl2
GO:0002690	positive regulation of leukocyte chemotaxis	26.75	0.000671609	0.0135015	16963	Xcl1
GO:0002690	positive regulation of leukocyte chemotaxis	26.75	0.000671609	0.0135015	68992	Zfp580
GO:0002690	positive regulation of leukocyte chemotaxis	26.75	0.000671609	0.0135015	17242	Mdk
GO:0032495	response to muramyl dipeptide	26.75	0.000671609	0.0135015	18035	Nfkbia
GO:0032495	response to muramyl dipeptide	26.75	0.000671609	0.0135015	332579	Card9
GO:0032495	response to muramyl dipeptide	26.75	0.000671609	0.0135015	21929	Tnfaip3
GO:2000273	positive regulation of signaling receptor activity	26.75	0.000671609	0.0135015	16153	Il10
GO:2000273	positive regulation of signaling receptor activity	26.75	0.000671609	0.0135015	13614	Edn1
GO:2000273	positive regulation of signaling receptor activity	26.75	0.000671609	0.0135015	12569	Cdk5r1
GO:0043153	entrainment of circadian clock by photoperiod	14.2667	0.000683351	0.0136293	15902	Id2
GO:0043153	entrainment of circadian clock by photoperiod	14.2667	0.000683351	0.0136293	17691	Sik1
GO:0043153	entrainment of circadian clock by photoperiod	14.2667	0.000683351	0.0136293	18626	Per1
GO:0043153	entrainment of circadian clock by photoperiod	14.2667	0.000683351	0.0136293	20893	Bhlhe40
GO:0070301	cellular response to hydrogen peroxide	9.55357	0.000724255	0.0143323	21929	Tnfaip3
GO:0070301	cellular response to hydrogen peroxide	9.55357	0.000724255	0.0143323	27050	Rps3
GO:0070301	cellular response to hydrogen peroxide	9.55357	0.000724255	0.0143323	22658	Pcgf2
GO:0070301	cellular response to hydrogen peroxide	9.55357	0.000724255	0.0143323	66680	Oser1
GO:0070301	cellular response to hydrogen peroxide	9.55357	0.000724255	0.0143323	68992	Zfp580
GO:0009611	response to wounding	7.29545	0.000738197	0.014495	17242	Mdk
GO:0009611	response to wounding	7.29545	0.000738197	0.014495	14728	Lilrb4a
GO:0009611	response to wounding	7.29545	0.000738197	0.014495	259277	Klk8
GO:0009611	response to wounding	7.29545	0.000738197	0.014495	20384	Srsf5
GO:0009611	response to wounding	7.29545	0.000738197	0.014495	74080	Nmnat3
GO:0009611	response to wounding	7.29545	0.000738197	0.014495	21929	Tnfaip3
GO:0071407	cellular response to organic cyclic compound	9.38596	0.000787826	0.0153505	99929	Tiparp
GO:0071407	cellular response to organic cyclic compound	9.38596	0.000787826	0.0153505	16176	Il1b
GO:0071407	cellular response to organic cyclic compound	9.38596	0.000787826	0.0153505	13076	Cyp1a1
GO:0071407	cellular response to organic cyclic compound	9.38596	0.000787826	0.0153505	18035	Nfkbia
GO:0071407	cellular response to organic cyclic compound	9.38596	0.000787826	0.0153505	11647	Alpl
GO:0006325	chromatin organization	3.77244	0.000800791	0.015484	19763	Ring1
GO:0006325	chromatin organization	3.77244	0.000800791	0.015484	14815	Nr3c1
GO:0006325	chromatin organization	3.77244	0.000800791	0.015484	64707	Suv39h2
GO:0006325	chromatin organization	3.77244	0.000800791	0.015484	244694	Kdm4d
GO:0006325	chromatin organization	3.77244	0.000800791	0.015484	11785	Apbb1
GO:0006325	chromatin organization	3.77244	0.000800791	0.015484	51812	Mcrs1
GO:0006325	chromatin organization	3.77244	0.000800791	0.015484	15312	Hmgn1
GO:0006325	chromatin organization	3.77244	0.000800791	0.015484	67956	Kmt5a
GO:0006325	chromatin organization	3.77244	0.000800791	0.015484	66310	Dpy30
GO:0006325	chromatin organization	3.77244	0.000800791	0.015484	67773	Kat8
GO:0006325	chromatin organization	3.77244	0.000800791	0.015484	52609	Cbx7
GO:0007399	nervous system development	3.29621	0.000826865	0.015867	320563	Islr2
GO:0007399	nervous system development	3.29621	0.000826865	0.015867	27103	Eif2ak4
GO:0007399	nervous system development	3.29621	0.000826865	0.015867	74195	Elp3
GO:0007399	nervous system development	3.29621	0.000826865	0.015867	18102	Nme1
GO:0007399	nervous system development	3.29621	0.000826865	0.015867	17135	Mafk
GO:0007399	nervous system development	3.29621	0.000826865	0.015867	14269	Fnbp1
GO:0007399	nervous system development	3.29621	0.000826865	0.015867	19716	Bex1
GO:0007399	nervous system development	3.29621	0.000826865	0.015867	63955	Cables1
GO:0007399	nervous system development	3.29621	0.000826865	0.015867	66912	Bzw2
GO:0007399	nervous system development	3.29621	0.000826865	0.015867	12890	Cplx2
GO:0007399	nervous system development	3.29621	0.000826865	0.015867	18227	Nr4a2
GO:0007399	nervous system development	3.29621	0.000826865	0.015867	12661	Chl1
GO:0007399	nervous system development	3.29621	0.000826865	0.015867	14281	Fos
GO:0006165	nucleoside diphosphate phosphorylation	24.6923	0.000867023	0.0165126	18103	Nme2
GO:0006165	nucleoside diphosphate phosphorylation	24.6923	0.000867023	0.0165126	229949	Ak5
GO:0006165	nucleoside diphosphate phosphorylation	24.6923	0.000867023	0.0165126	18102	Nme1
GO:0006281	DNA repair	3.47967	0.000879148	0.0166185	272158	Poln
GO:0006281	DNA repair	3.47967	0.000879148	0.0166185	17314	Mgmt
GO:0006281	DNA repair	3.47967	0.000879148	0.0166185	69747	Zswim7
GO:0006281	DNA repair	3.47967	0.000879148	0.0166185	19718	Rfc2
GO:0006281	DNA repair	3.47967	0.000879148	0.0166185	72774	Neil1
GO:0006281	DNA repair	3.47967	0.000879148	0.0166185	27050	Rps3
GO:0006281	DNA repair	3.47967	0.000879148	0.0166185	14156	Fen1
GO:0006281	DNA repair	3.47967	0.000879148	0.0166185	268395	Mpg
GO:0006281	DNA repair	3.47967	0.000879148	0.0166185	68077	Nop53
GO:0006281	DNA repair	3.47967	0.000879148	0.0166185	17420	Mnat1
GO:0006281	DNA repair	3.47967	0.000879148	0.0166185	110749	Chaf1b
GO:0006281	DNA repair	3.47967	0.000879148	0.0166185	51812	Mcrs1
GO:0002230	positive regulation of defense response to virus by host	12.9697	0.000997952	0.0185047	27103	Eif2ak4
GO:0002230	positive regulation of defense response to virus by host	12.9697	0.000997952	0.0185047	66824	Pycard
GO:0002230	positive regulation of defense response to virus by host	12.9697	0.000997952	0.0185047	80795	Selenok
GO:0002230	positive regulation of defense response to virus by host	12.9697	0.000997952	0.0185047	16160	Il12b
GO:0051603	proteolysis involved in cellular protein catabolic process	8.91667	0.00100423	0.0185047	19172	Psmb4
GO:0051603	proteolysis involved in cellular protein catabolic process	8.91667	0.00100423	0.0185047	73902	Psmb11
GO:0051603	proteolysis involved in cellular protein catabolic process	8.91667	0.00100423	0.0185047	13036	Ctsh
GO:0051603	proteolysis involved in cellular protein catabolic process	8.91667	0.00100423	0.0185047	14828	Hspa5
GO:0051603	proteolysis involved in cellular protein catabolic process	8.91667	0.00100423	0.0185047	26444	Psma7
GO:0001966	thigmotaxis	71.3333	0.0010401	0.0185047	216856	Nlgn2
GO:0001966	thigmotaxis	71.3333	0.0010401	0.0185047	15902	Id2
GO:0002762	negative regulation of myeloid leukocyte differentiation	71.3333	0.0010401	0.0185047	18102	Nme1
GO:0002762	negative regulation of myeloid leukocyte differentiation	71.3333	0.0010401	0.0185047	18103	Nme2
GO:0021986	habenula development	71.3333	0.0010401	0.0185047	18227	Nr4a2
GO:0021986	habenula development	71.3333	0.0010401	0.0185047	18508	Pax6
GO:0045833	negative regulation of lipid metabolic process	71.3333	0.0010401	0.0185047	16176	Il1b
GO:0045833	negative regulation of lipid metabolic process	71.3333	0.0010401	0.0185047	11813	Apoc2
GO:0043161	proteasome-mediated ubiquitin-dependent protein catabolic process	4.89143	0.00105816	0.0185047	20439	Siah2
GO:0043161	proteasome-mediated ubiquitin-dependent protein catabolic process	4.89143	0.00105816	0.0185047	19185	Psmd4
GO:0043161	proteasome-mediated ubiquitin-dependent protein catabolic process	4.89143	0.00105816	0.0185047	66825	Rnf186
GO:0043161	proteasome-mediated ubiquitin-dependent protein catabolic process	4.89143	0.00105816	0.0185047	434246	Trim72
GO:0043161	proteasome-mediated ubiquitin-dependent protein catabolic process	4.89143	0.00105816	0.0185047	73902	Psmb11
GO:0043161	proteasome-mediated ubiquitin-dependent protein catabolic process	4.89143	0.00105816	0.0185047	13198	Ddit3
GO:0043161	proteasome-mediated ubiquitin-dependent protein catabolic process	4.89143	0.00105816	0.0185047	26444	Psma7
GO:0043161	proteasome-mediated ubiquitin-dependent protein catabolic process	4.89143	0.00105816	0.0185047	19172	Psmb4
GO:0000082	G1/S transition of mitotic cell cycle	8.77049	0.00108554	0.0185047	20620	Plk2
GO:0000082	G1/S transition of mitotic cell cycle	8.77049	0.00108554	0.0185047	63955	Cables1
GO:0000082	G1/S transition of mitotic cell cycle	8.77049	0.00108554	0.0185047	17420	Mnat1
GO:0000082	G1/S transition of mitotic cell cycle	8.77049	0.00108554	0.0185047	50523	Lats2
GO:0000082	G1/S transition of mitotic cell cycle	8.77049	0.00108554	0.0185047	50927	Nasp
GO:0008217	regulation of blood pressure	8.77049	0.00108554	0.0185047	13614	Edn1
GO:0008217	regulation of blood pressure	8.77049	0.00108554	0.0185047	19225	Ptgs2
GO:0008217	regulation of blood pressure	8.77049	0.00108554	0.0185047	11475	Acta2
GO:0008217	regulation of blood pressure	8.77049	0.00108554	0.0185047	20655	Sod1
GO:0008217	regulation of blood pressure	8.77049	0.00108554	0.0185047	93670	Tac4
GO:0010033	response to organic substance	8.77049	0.00108554	0.0185047	16600	Klf4
GO:0010033	response to organic substance	8.77049	0.00108554	0.0185047	66483	Rpl36al
GO:0010033	response to organic substance	8.77049	0.00108554	0.0185047	20655	Sod1
GO:0010033	response to organic substance	8.77049	0.00108554	0.0185047	19309	Pygm
GO:0010033	response to organic substance	8.77049	0.00108554	0.0185047	16160	Il12b
GO:0071347	cellular response to interleukin-1	8.77049	0.00108554	0.0185047	66824	Pycard
GO:0071347	cellular response to interleukin-1	8.77049	0.00108554	0.0185047	12608	Cebpb
GO:0071347	cellular response to interleukin-1	8.77049	0.00108554	0.0185047	16963	Xcl1
GO:0071347	cellular response to interleukin-1	8.77049	0.00108554	0.0185047	16365	Acod1
GO:0071347	cellular response to interleukin-1	8.77049	0.00108554	0.0185047	20303	Ccl4
GO:0000463	maturation of LSU-rRNA from tricistronic rRNA transcript (SSU-rRNA, 5.8S rRNA, LSU-rRNA)	22.9286	0.00109582	0.0185047	64934	Pes1
GO:0000463	maturation of LSU-rRNA from tricistronic rRNA transcript (SSU-rRNA, 5.8S rRNA, LSU-rRNA)	22.9286	0.00109582	0.0185047	448850	Znhit3
GO:0000463	maturation of LSU-rRNA from tricistronic rRNA transcript (SSU-rRNA, 5.8S rRNA, LSU-rRNA)	22.9286	0.00109582	0.0185047	19989	Rpl7
GO:0006163	purine nucleotide metabolic process	22.9286	0.00109582	0.0185047	11565	Adssl1
GO:0006163	purine nucleotide metabolic process	22.9286	0.00109582	0.0185047	14923	Guk1
GO:0006163	purine nucleotide metabolic process	22.9286	0.00109582	0.0185047	229949	Ak5
GO:0006851	mitochondrial calcium ion transmembrane transport	22.9286	0.00109582	0.0185047	66592	Stoml2
GO:0006851	mitochondrial calcium ion transmembrane transport	22.9286	0.00109582	0.0185047	66815	Mcub
GO:0006851	mitochondrial calcium ion transmembrane transport	22.9286	0.00109582	0.0185047	69029	Smdt1
GO:0031915	positive regulation of synaptic plasticity	22.9286	0.00109582	0.0185047	19225	Ptgs2
GO:0031915	positive regulation of synaptic plasticity	22.9286	0.00109582	0.0185047	382018	Unc13a
GO:0031915	positive regulation of synaptic plasticity	22.9286	0.00109582	0.0185047	12890	Cplx2
GO:0042953	lipoprotein transport	22.9286	0.00109582	0.0185047	17777	Mttp
GO:0042953	lipoprotein transport	22.9286	0.00109582	0.0185047	11813	Apoc2
GO:0042953	lipoprotein transport	22.9286	0.00109582	0.0185047	20288	Msr1
GO:0051225	spindle assembly	12.5882	0.00112268	0.0187089	71909	Haus5
GO:0051225	spindle assembly	12.5882	0.00112268	0.0187089	73738	Haus7
GO:0051225	spindle assembly	12.5882	0.00112268	0.0187089	66296	Haus2
GO:0051225	spindle assembly	12.5882	0.00112268	0.0187089	27050	Rps3
GO:0071310	cellular response to organic substance	12.5882	0.00112268	0.0187089	13653	Egr1
GO:0071310	cellular response to organic substance	12.5882	0.00112268	0.0187089	16176	Il1b
GO:0071310	cellular response to organic substance	12.5882	0.00112268	0.0187089	13654	Egr2
GO:0071310	cellular response to organic substance	12.5882	0.00112268	0.0187089	15370	Nr4a1
GO:0008152	metabolic process	4.83616	0.00114237	0.0189126	72774	Neil1
GO:0008152	metabolic process	4.83616	0.00114237	0.0189126	99929	Tiparp
GO:0008152	metabolic process	4.83616	0.00114237	0.0189126	212974	Pgghg
GO:0008152	metabolic process	4.83616	0.00114237	0.0189126	11605	Gla
GO:0008152	metabolic process	4.83616	0.00114237	0.0189126	19309	Pygm
GO:0008152	metabolic process	4.83616	0.00114237	0.0189126	110948	Hlcs
GO:0008152	metabolic process	4.83616	0.00114237	0.0189126	21929	Tnfaip3
GO:0008152	metabolic process	4.83616	0.00114237	0.0189126	17105	Lyz2
GO:0070374	positive regulation of ERK1 and ERK2 cascade	4.29911	0.0011614	0.0191028	11475	Acta2
GO:0070374	positive regulation of ERK1 and ERK2 cascade	4.29911	0.0011614	0.0191028	20303	Ccl4
GO:0070374	positive regulation of ERK1 and ERK2 cascade	4.29911	0.0011614	0.0191028	107221	Ffar4
GO:0070374	positive regulation of ERK1 and ERK2 cascade	4.29911	0.0011614	0.0191028	22340	Vegfb
GO:0070374	positive regulation of ERK1 and ERK2 cascade	4.29911	0.0011614	0.0191028	66824	Pycard
GO:0070374	positive regulation of ERK1 and ERK2 cascade	4.29911	0.0011614	0.0191028	24064	Spry2
GO:0070374	positive regulation of ERK1 and ERK2 cascade	4.29911	0.0011614	0.0191028	16176	Il1b
GO:0070374	positive regulation of ERK1 and ERK2 cascade	4.29911	0.0011614	0.0191028	64654	Fgf23
GO:0070374	positive regulation of ERK1 and ERK2 cascade	4.29911	0.0011614	0.0191028	16963	Xcl1
GO:0002548	monocyte chemotaxis	12.2286	0.00125821	0.0202996	20303	Ccl4
GO:0002548	monocyte chemotaxis	12.2286	0.00125821	0.0202996	19277	Ptpro
GO:0002548	monocyte chemotaxis	12.2286	0.00125821	0.0202996	16963	Xcl1
GO:0002548	monocyte chemotaxis	12.2286	0.00125821	0.0202996	20085	Rps19
GO:0031640	killing of cells of other organism	12.2286	0.00125821	0.0202996	19946	Rpl30
GO:0031640	killing of cells of other organism	12.2286	0.00125821	0.0202996	16963	Xcl1
GO:0031640	killing of cells of other organism	12.2286	0.00125821	0.0202996	20085	Rps19
GO:0031640	killing of cells of other organism	12.2286	0.00125821	0.0202996	20310	Cxcl2
GO:0032689	negative regulation of interferon-gamma production	12.2286	0.00125821	0.0202996	16963	Xcl1
GO:0032689	negative regulation of interferon-gamma production	12.2286	0.00125821	0.0202996	16153	Il10
GO:0032689	negative regulation of interferon-gamma production	12.2286	0.00125821	0.0202996	12261	C1qbp
GO:0032689	negative regulation of interferon-gamma production	12.2286	0.00125821	0.0202996	13198	Ddit3
GO:0032717	negative regulation of interleukin-8 production	21.4	0.00136026	0.0218072	26390	Mapkbp1
GO:0032717	negative regulation of interleukin-8 production	21.4	0.00136026	0.0218072	16600	Klf4
GO:0032717	negative regulation of interleukin-8 production	21.4	0.00136026	0.0218072	269855	Ssc5d
GO:0006898	receptor-mediated endocytosis	8.23077	0.00146169	0.0231404	93835	Amn
GO:0006898	receptor-mediated endocytosis	8.23077	0.00146169	0.0231404	217303	Cd300a
GO:0006898	receptor-mediated endocytosis	8.23077	0.00146169	0.0231404	81907	Tmem108
GO:0006898	receptor-mediated endocytosis	8.23077	0.00146169	0.0231404	20288	Msr1
GO:0006898	receptor-mediated endocytosis	8.23077	0.00146169	0.0231404	380713	Scarf1
GO:0050766	positive regulation of phagocytosis	8.23077	0.00146169	0.0231404	100038947	Sirpb1c
GO:0050766	positive regulation of phagocytosis	8.23077	0.00146169	0.0231404	16176	Il1b
GO:0050766	positive regulation of phagocytosis	8.23077	0.00146169	0.0231404	20655	Sod1
GO:0050766	positive regulation of phagocytosis	8.23077	0.00146169	0.0231404	66824	Pycard
GO:0050766	positive regulation of phagocytosis	8.23077	0.00146169	0.0231404	17089	Lyar
GO:0051607	defense response to virus	4.65217	0.00148129	0.023305	27103	Eif2ak4
GO:0051607	defense response to virus	4.65217	0.00148129	0.023305	216799	Nlrp3
GO:0051607	defense response to virus	4.65217	0.00148129	0.023305	332579	Card9
GO:0051607	defense response to virus	4.65217	0.00148129	0.023305	16365	Acod1
GO:0051607	defense response to virus	4.65217	0.00148129	0.023305	100689	Spon2
GO:0051607	defense response to virus	4.65217	0.00148129	0.023305	66824	Pycard
GO:0051607	defense response to virus	4.65217	0.00148129	0.023305	80876	Ifitm2
GO:0051607	defense response to virus	4.65217	0.00148129	0.023305	16160	Il12b
GO:0048662	negative regulation of smooth muscle cell proliferation	11.5676	0.00156378	0.0243009	21929	Tnfaip3
GO:0048662	negative regulation of smooth muscle cell proliferation	11.5676	0.00156378	0.0243009	16160	Il12b
GO:0048662	negative regulation of smooth muscle cell proliferation	11.5676	0.00156378	0.0243009	211770	Trib1
GO:0048662	negative regulation of smooth muscle cell proliferation	11.5676	0.00156378	0.0243009	16600	Klf4
GO:0050807	regulation of synapse organization	11.5676	0.00156378	0.0243009	259277	Klk8
GO:0050807	regulation of synapse organization	11.5676	0.00156378	0.0243009	26570	Slc7a11
GO:0050807	regulation of synapse organization	11.5676	0.00156378	0.0243009	16153	Il10
GO:0050807	regulation of synapse organization	11.5676	0.00156378	0.0243009	19277	Ptpro
GO:0007155	cell adhesion	2.79617	0.00161636	0.024772	12154	Bmp10
GO:0007155	cell adhesion	2.79617	0.00161636	0.024772	54156	Egfl6
GO:0007155	cell adhesion	2.79617	0.00161636	0.024772	94332	Cadm3
GO:0007155	cell adhesion	2.79617	0.00161636	0.024772	100689	Spon2
GO:0007155	cell adhesion	2.79617	0.00161636	0.024772	107934	Celsr3
GO:0007155	cell adhesion	2.79617	0.00161636	0.024772	93711	Pcdhga3
GO:0007155	cell adhesion	2.79617	0.00161636	0.024772	380713	Scarf1
GO:0007155	cell adhesion	2.79617	0.00161636	0.024772	16633	Klra2
GO:0007155	cell adhesion	2.79617	0.00161636	0.024772	233199	Mybpc2
GO:0007155	cell adhesion	2.79617	0.00161636	0.024772	15442	Hpse
GO:0007155	cell adhesion	2.79617	0.00161636	0.024772	216856	Nlgn2
GO:0007155	cell adhesion	2.79617	0.00161636	0.024772	93706	Pcdhgc3
GO:0007155	cell adhesion	2.79617	0.00161636	0.024772	320664	Cass4
GO:0007155	cell adhesion	2.79617	0.00161636	0.024772	17064	Cd93
GO:0007155	cell adhesion	2.79617	0.00161636	0.024772	12661	Chl1
GO:0006816	calcium ion transport	5.27465	0.00161806	0.024772	66815	Mcub
GO:0006816	calcium ion transport	5.27465	0.00161806	0.024772	22064	Trpc2
GO:0006816	calcium ion transport	5.27465	0.00161806	0.024772	80795	Selenok
GO:0006816	calcium ion transport	5.27465	0.00161806	0.024772	12721	Coro1a
GO:0006816	calcium ion transport	5.27465	0.00161806	0.024772	12289	Cacna1d
GO:0006816	calcium ion transport	5.27465	0.00161806	0.024772	69029	Smdt1
GO:0006816	calcium ion transport	5.27465	0.00161806	0.024772	317750	Slc24a5
GO:0032755	positive regulation of interleukin-6 production	6.29412	0.00164321	0.024772	226421	Rab7b
GO:0032755	positive regulation of interleukin-6 production	6.29412	0.00164321	0.024772	100689	Spon2
GO:0032755	positive regulation of interleukin-6 production	6.29412	0.00164321	0.024772	16176	Il1b
GO:0032755	positive regulation of interleukin-6 production	6.29412	0.00164321	0.024772	332579	Card9
GO:0032755	positive regulation of interleukin-6 production	6.29412	0.00164321	0.024772	66824	Pycard
GO:0032755	positive regulation of interleukin-6 production	6.29412	0.00164321	0.024772	80795	Selenok
GO:0032760	positive regulation of tumor necrosis factor production	6.29412	0.00164321	0.024772	20303	Ccl4
GO:0032760	positive regulation of tumor necrosis factor production	6.29412	0.00164321	0.024772	100689	Spon2
GO:0032760	positive regulation of tumor necrosis factor production	6.29412	0.00164321	0.024772	66824	Pycard
GO:0032760	positive regulation of tumor necrosis factor production	6.29412	0.00164321	0.024772	16160	Il12b
GO:0032760	positive regulation of tumor necrosis factor production	6.29412	0.00164321	0.024772	80795	Selenok
GO:0032760	positive regulation of tumor necrosis factor production	6.29412	0.00164321	0.024772	332579	Card9
GO:0008285	negative regulation of cell proliferation	3.24242	0.00165786	0.024772	24064	Spry2
GO:0008285	negative regulation of cell proliferation	3.24242	0.00165786	0.024772	18508	Pax6
GO:0008285	negative regulation of cell proliferation	3.24242	0.00165786	0.024772	232441	Rerg
GO:0008285	negative regulation of cell proliferation	3.24242	0.00165786	0.024772	66259	Camk2n1
GO:0008285	negative regulation of cell proliferation	3.24242	0.00165786	0.024772	19252	Dusp1
GO:0008285	negative regulation of cell proliferation	3.24242	0.00165786	0.024772	21815	Tgif1
GO:0008285	negative regulation of cell proliferation	3.24242	0.00165786	0.024772	16153	Il10
GO:0008285	negative regulation of cell proliferation	3.24242	0.00165786	0.024772	56330	Pdcd5
GO:0008285	negative regulation of cell proliferation	3.24242	0.00165786	0.024772	194655	Klf11
GO:0008285	negative regulation of cell proliferation	3.24242	0.00165786	0.024772	19225	Ptgs2
GO:0008285	negative regulation of cell proliferation	3.24242	0.00165786	0.024772	16176	Il1b
GO:0008285	negative regulation of cell proliferation	3.24242	0.00165786	0.024772	16600	Klf4
GO:0015986	ATP synthesis coupled proton transport	20.0625	0.00166255	0.024772	67126	Atp5e
GO:0015986	ATP synthesis coupled proton transport	20.0625	0.00166255	0.024772	11949	Atp5c1
GO:0015986	ATP synthesis coupled proton transport	20.0625	0.00166255	0.024772	27425	Atp5l
GO:0032611	interleukin-1 beta production	20.0625	0.00166255	0.024772	66824	Pycard
GO:0032611	interleukin-1 beta production	20.0625	0.00166255	0.024772	16176	Il1b
GO:0032611	interleukin-1 beta production	20.0625	0.00166255	0.024772	216799	Nlrp3
GO:0070059	intrinsic apoptotic signaling pathway in response to endoplasmic reticulum stress	11.2632	0.00173489	0.0256987	66825	Rnf186
GO:0070059	intrinsic apoptotic signaling pathway in response to endoplasmic reticulum stress	11.2632	0.00173489	0.0256987	80795	Selenok
GO:0070059	intrinsic apoptotic signaling pathway in response to endoplasmic reticulum stress	11.2632	0.00173489	0.0256987	12608	Cebpb
GO:0070059	intrinsic apoptotic signaling pathway in response to endoplasmic reticulum stress	11.2632	0.00173489	0.0256987	13198	Ddit3
GO:0006470	protein dephosphorylation	5.20139	0.00175995	0.0259183	19253	Ptpn18
GO:0006470	protein dephosphorylation	5.20139	0.00175995	0.0259183	63953	Dusp10
GO:0006470	protein dephosphorylation	5.20139	0.00175995	0.0259183	19252	Dusp1
GO:0006470	protein dephosphorylation	5.20139	0.00175995	0.0259183	19277	Ptpro
GO:0006470	protein dephosphorylation	5.20139	0.00175995	0.0259183	52468	Ctdsp2
GO:0006470	protein dephosphorylation	5.20139	0.00175995	0.0259183	218232	Ptpdc1
GO:0006470	protein dephosphorylation	5.20139	0.00175995	0.0259183	240672	Dusp5
GO:0007613	memory	6.11429	0.00191823	0.0277061	19225	Ptgs2
GO:0007613	memory	6.11429	0.00191823	0.0277061	20620	Plk2
GO:0007613	memory	6.11429	0.00191823	0.0277061	16176	Il1b
GO:0007613	memory	6.11429	0.00191823	0.0277061	329934	Foxo6
GO:0007613	memory	6.11429	0.00191823	0.0277061	14156	Fen1
GO:0007613	memory	6.11429	0.00191823	0.0277061	259277	Klk8
GO:0009790	embryo development	7.75362	0.00192882	0.0277061	79235	Lrat
GO:0009790	embryo development	7.75362	0.00192882	0.0277061	54124	Cks1b
GO:0009790	embryo development	7.75362	0.00192882	0.0277061	21824	Thbd
GO:0009790	embryo development	7.75362	0.00192882	0.0277061	16147	Ihh
GO:0009790	embryo development	7.75362	0.00192882	0.0277061	12592	Cdx4
GO:0043154	negative regulation of cysteine-type endopeptidase activity involved in apoptotic process	7.75362	0.00192882	0.0277061	15370	Nr4a1
GO:0043154	negative regulation of cysteine-type endopeptidase activity involved in apoptotic process	7.75362	0.00192882	0.0277061	19225	Ptgs2
GO:0043154	negative regulation of cysteine-type endopeptidase activity involved in apoptotic process	7.75362	0.00192882	0.0277061	11798	Xiap
GO:0043154	negative regulation of cysteine-type endopeptidase activity involved in apoptotic process	7.75362	0.00192882	0.0277061	20439	Siah2
GO:0043154	negative regulation of cysteine-type endopeptidase activity involved in apoptotic process	7.75362	0.00192882	0.0277061	16600	Klf4
GO:0050808	synapse organization	7.75362	0.00192882	0.0277061	11785	Apbb1
GO:0050808	synapse organization	7.75362	0.00192882	0.0277061	259277	Klk8
GO:0050808	synapse organization	7.75362	0.00192882	0.0277061	216856	Nlgn2
GO:0050808	synapse organization	7.75362	0.00192882	0.0277061	93707	Pcdhgc4
GO:0050808	synapse organization	7.75362	0.00192882	0.0277061	93706	Pcdhgc3
GO:0030595	leukocyte chemotaxis	18.8824	0.00200481	0.0277061	20310	Cxcl2
GO:0030595	leukocyte chemotaxis	18.8824	0.00200481	0.0277061	12721	Coro1a
GO:0030595	leukocyte chemotaxis	18.8824	0.00200481	0.0277061	20303	Ccl4
GO:0045475	locomotor rhythm	18.8824	0.00200481	0.0277061	229599	Ciart
GO:0045475	locomotor rhythm	18.8824	0.00200481	0.0277061	15902	Id2
GO:0045475	locomotor rhythm	18.8824	0.00200481	0.0277061	13653	Egr1
GO:0090336	positive regulation of brown fat cell differentiation	18.8824	0.00200481	0.0277061	107221	Ffar4
GO:0090336	positive regulation of brown fat cell differentiation	18.8824	0.00200481	0.0277061	19225	Ptgs2
GO:0090336	positive regulation of brown fat cell differentiation	18.8824	0.00200481	0.0277061	18712	Pim1
GO:1904263	positive regulation of TORC1 signaling	18.8824	0.00200481	0.0277061	52187	Rragd
GO:1904263	positive regulation of TORC1 signaling	18.8824	0.00200481	0.0277061	110379	Sec13
GO:1904263	positive regulation of TORC1 signaling	18.8824	0.00200481	0.0277061	107045	Lars
GO:0019722	calcium-mediated signaling	7.64286	0.00206136	0.0277061	54199	Ccrl2
GO:0019722	calcium-mediated signaling	7.64286	0.00206136	0.0277061	12289	Cacna1d
GO:0019722	calcium-mediated signaling	7.64286	0.00206136	0.0277061	12671	Chrm3
GO:0019722	calcium-mediated signaling	7.64286	0.00206136	0.0277061	56743	Lat2
GO:0019722	calcium-mediated signaling	7.64286	0.00206136	0.0277061	13614	Edn1
GO:0032922	circadian regulation of gene expression	7.64286	0.00206136	0.0277061	15902	Id2
GO:0032922	circadian regulation of gene expression	7.64286	0.00206136	0.0277061	20893	Bhlhe40
GO:0032922	circadian regulation of gene expression	7.64286	0.00206136	0.0277061	13653	Egr1
GO:0032922	circadian regulation of gene expression	7.64286	0.00206136	0.0277061	229599	Ciart
GO:0032922	circadian regulation of gene expression	7.64286	0.00206136	0.0277061	18626	Per1
GO:0006450	regulation of translational fidelity	53.5	0.0020673	0.0277061	230734	Yrdc
GO:0006450	regulation of translational fidelity	53.5	0.0020673	0.0277061	69684	Aarsd1
GO:0010916	negative regulation of very-low-density lipoprotein particle clearance	53.5	0.0020673	0.0277061	16976	Lrpap1
GO:0010916	negative regulation of very-low-density lipoprotein particle clearance	53.5	0.0020673	0.0277061	11813	Apoc2
GO:0032227	negative regulation of synaptic transmission, dopaminergic	53.5	0.0020673	0.0277061	19225	Ptgs2
GO:0032227	negative regulation of synaptic transmission, dopaminergic	53.5	0.0020673	0.0277061	110312	Pmch
GO:0033007	negative regulation of mast cell activation involved in immune response	53.5	0.0020673	0.0277061	14728	Lilrb4a
GO:0033007	negative regulation of mast cell activation involved in immune response	53.5	0.0020673	0.0277061	217303	Cd300a
GO:1901842	negative regulation of high voltage-gated calcium channel activity	53.5	0.0020673	0.0277061	56437	Rrad
GO:1901842	negative regulation of high voltage-gated calcium channel activity	53.5	0.0020673	0.0277061	14579	Gem
GO:2000138	positive regulation of cell proliferation involved in heart morphogenesis	53.5	0.0020673	0.0277061	12154	Bmp10
GO:2000138	positive regulation of cell proliferation involved in heart morphogenesis	53.5	0.0020673	0.0277061	17938	Naca
GO:2000503	positive regulation of natural killer cell chemotaxis	53.5	0.0020673	0.0277061	16963	Xcl1
GO:2000503	positive regulation of natural killer cell chemotaxis	53.5	0.0020673	0.0277061	20303	Ccl4
GO:0007098	centrosome cycle	10.7	0.00211649	0.0282161	13197	Gadd45a
GO:0007098	centrosome cycle	10.7	0.00211649	0.0282161	66296	Haus2
GO:0007098	centrosome cycle	10.7	0.00211649	0.0282161	71909	Haus5
GO:0007098	centrosome cycle	10.7	0.00211649	0.0282161	73738	Haus7
GO:0006469	negative regulation of protein kinase activity	7.53521	0.00220062	0.0291842	66259	Camk2n1
GO:0006469	negative regulation of protein kinase activity	7.53521	0.00220062	0.0291842	13197	Gadd45a
GO:0006469	negative regulation of protein kinase activity	7.53521	0.00220062	0.0291842	17873	Gadd45b
GO:0006469	negative regulation of protein kinase activity	7.53521	0.00220062	0.0291842	211770	Trib1
GO:0006469	negative regulation of protein kinase activity	7.53521	0.00220062	0.0291842	23882	Gadd45g
GO:0042981	regulation of apoptotic process	4.36735	0.00224987	0.0296819	242509	Bnc2
GO:0042981	regulation of apoptotic process	4.36735	0.00224987	0.0296819	332579	Card9
GO:0042981	regulation of apoptotic process	4.36735	0.00224987	0.0296819	71839	Osgin1
GO:0042981	regulation of apoptotic process	4.36735	0.00224987	0.0296819	66824	Pycard
GO:0042981	regulation of apoptotic process	4.36735	0.00224987	0.0296819	18103	Nme2
GO:0042981	regulation of apoptotic process	4.36735	0.00224987	0.0296819	27050	Rps3
GO:0042981	regulation of apoptotic process	4.36735	0.00224987	0.0296819	68077	Nop53
GO:0042981	regulation of apoptotic process	4.36735	0.00224987	0.0296819	13653	Egr1
GO:0001938	positive regulation of endothelial cell proliferation	7.43056	0.00234684	0.0304098	28106	Mydgf
GO:0001938	positive regulation of endothelial cell proliferation	7.43056	0.00234684	0.0304098	15370	Nr4a1
GO:0001938	positive regulation of endothelial cell proliferation	7.43056	0.00234684	0.0304098	22340	Vegfb
GO:0001938	positive regulation of endothelial cell proliferation	7.43056	0.00234684	0.0304098	16153	Il10
GO:0001938	positive regulation of endothelial cell proliferation	7.43056	0.00234684	0.0304098	68992	Zfp580
GO:0000188	inactivation of MAPK activity	17.8333	0.00238909	0.0304098	19252	Dusp1
GO:0000188	inactivation of MAPK activity	17.8333	0.00238909	0.0304098	240672	Dusp5
GO:0000188	inactivation of MAPK activity	17.8333	0.00238909	0.0304098	63953	Dusp10
GO:0008210	estrogen metabolic process	17.8333	0.00238909	0.0304098	13076	Cyp1a1
GO:0008210	estrogen metabolic process	17.8333	0.00238909	0.0304098	99929	Tiparp
GO:0008210	estrogen metabolic process	17.8333	0.00238909	0.0304098	14979	H2-Ke6
GO:0030150	protein import into mitochondrial matrix	17.8333	0.00238909	0.0304098	66169	Tomm7
GO:0030150	protein import into mitochondrial matrix	17.8333	0.00238909	0.0304098	67952	Tomm20
GO:0030150	protein import into mitochondrial matrix	17.8333	0.00238909	0.0304098	17713	Grpel1
GO:0045019	negative regulation of nitric oxide biosynthetic process	17.8333	0.00238909	0.0304098	12257	Tspo
GO:0045019	negative regulation of nitric oxide biosynthetic process	17.8333	0.00238909	0.0304098	11605	Gla
GO:0045019	negative regulation of nitric oxide biosynthetic process	17.8333	0.00238909	0.0304098	16153	Il10
GO:0045824	negative regulation of innate immune response	17.8333	0.00238909	0.0304098	16365	Acod1
GO:0045824	negative regulation of innate immune response	17.8333	0.00238909	0.0304098	21929	Tnfaip3
GO:0045824	negative regulation of innate immune response	17.8333	0.00238909	0.0304098	17089	Lyar
GO:1900016	negative regulation of cytokine production involved in inflammatory response	17.8333	0.00238909	0.0304098	67116	Cuedc2
GO:1900016	negative regulation of cytokine production involved in inflammatory response	17.8333	0.00238909	0.0304098	16178	Il1r2
GO:1900016	negative regulation of cytokine production involved in inflammatory response	17.8333	0.00238909	0.0304098	66824	Pycard
GO:0060271	cilium assembly	4.32323	0.00240467	0.0304552	80291	Rilpl2
GO:0060271	cilium assembly	4.32323	0.00240467	0.0304552	213575	Dync2li1
GO:0060271	cilium assembly	4.32323	0.00240467	0.0304552	218232	Ptpdc1
GO:0060271	cilium assembly	4.32323	0.00240467	0.0304552	232987	B9d2
GO:0060271	cilium assembly	4.32323	0.00240467	0.0304552	218630	Ccno
GO:0060271	cilium assembly	4.32323	0.00240467	0.0304552	107934	Celsr3
GO:0060271	cilium assembly	4.32323	0.00240467	0.0304552	74025	Nphp3
GO:0060271	cilium assembly	4.32323	0.00240467	0.0304552	213081	Wdr19
GO:0050830	defense response to Gram-positive bacterium	4.92763	0.0024299	0.0306216	67248	Rpl39
GO:0050830	defense response to Gram-positive bacterium	4.92763	0.0024299	0.0306216	269855	Ssc5d
GO:0050830	defense response to Gram-positive bacterium	4.92763	0.0024299	0.0306216	17105	Lyz2
GO:0050830	defense response to Gram-positive bacterium	4.92763	0.0024299	0.0306216	71660	Rarres2
GO:0050830	defense response to Gram-positive bacterium	4.92763	0.0024299	0.0306216	332579	Card9
GO:0050830	defense response to Gram-positive bacterium	4.92763	0.0024299	0.0306216	216799	Nlrp3
GO:0050830	defense response to Gram-positive bacterium	4.92763	0.0024299	0.0306216	14109	Fau
GO:0007224	smoothened signaling pathway	7.22973	0.00266097	0.0333675	218232	Ptpdc1
GO:0007224	smoothened signaling pathway	7.22973	0.00266097	0.0333675	16147	Ihh
GO:0007224	smoothened signaling pathway	7.22973	0.00266097	0.0333675	18508	Pax6
GO:0007224	smoothened signaling pathway	7.22973	0.00266097	0.0333675	68525	Evc2
GO:0007224	smoothened signaling pathway	7.22973	0.00266097	0.0333675	213081	Wdr19
GO:0010629	negative regulation of gene expression	3.26039	0.00271883	0.0339251	16176	Il1b
GO:0010629	negative regulation of gene expression	3.26039	0.00271883	0.0339251	16600	Klf4
GO:0010629	negative regulation of gene expression	3.26039	0.00271883	0.0339251	99929	Tiparp
GO:0010629	negative regulation of gene expression	3.26039	0.00271883	0.0339251	14694	Rack1
GO:0010629	negative regulation of gene expression	3.26039	0.00271883	0.0339251	18102	Nme1
GO:0010629	negative regulation of gene expression	3.26039	0.00271883	0.0339251	20288	Msr1
GO:0010629	negative regulation of gene expression	3.26039	0.00271883	0.0339251	13614	Edn1
GO:0010629	negative regulation of gene expression	3.26039	0.00271883	0.0339251	15902	Id2
GO:0010629	negative regulation of gene expression	3.26039	0.00271883	0.0339251	21815	Tgif1
GO:0010629	negative regulation of gene expression	3.26039	0.00271883	0.0339251	22340	Vegfb
GO:0010629	negative regulation of gene expression	3.26039	0.00271883	0.0339251	65113	Ndfip1
GO:0030282	bone mineralization	9.95349	0.00279549	0.0344553	21847	Klf10
GO:0030282	bone mineralization	9.95349	0.00279549	0.0344553	18675	Phex
GO:0030282	bone mineralization	9.95349	0.00279549	0.0344553	11605	Gla
GO:0030282	bone mineralization	9.95349	0.00279549	0.0344553	19225	Ptgs2
GO:0034198	cellular response to amino acid starvation	9.95349	0.00279549	0.0344553	27103	Eif2ak4
GO:0034198	cellular response to amino acid starvation	9.95349	0.00279549	0.0344553	11910	Atf3
GO:0034198	cellular response to amino acid starvation	9.95349	0.00279549	0.0344553	70394	Kptn
GO:0034198	cellular response to amino acid starvation	9.95349	0.00279549	0.0344553	107045	Lars
GO:2000249	regulation of actin cytoskeleton reorganization	16.8947	0.00281738	0.0344553	17242	Mdk
GO:2000249	regulation of actin cytoskeleton reorganization	16.8947	0.00281738	0.0344553	63986	Gmfg
GO:2000249	regulation of actin cytoskeleton reorganization	16.8947	0.00281738	0.0344553	11854	Rhod
GO:0009267	cellular response to starvation	7.13333	0.00282933	0.0344553	57875	Angptl4
GO:0009267	cellular response to starvation	7.13333	0.00282933	0.0344553	67443	Map1lc3b
GO:0009267	cellular response to starvation	7.13333	0.00282933	0.0344553	52187	Rragd
GO:0009267	cellular response to starvation	7.13333	0.00282933	0.0344553	27103	Eif2ak4
GO:0009267	cellular response to starvation	7.13333	0.00282933	0.0344553	21847	Klf10
GO:0032436	positive regulation of proteasomal ubiquitin-dependent protein catabolic process	7.13333	0.00282933	0.0344553	170930	Sumo2
GO:0032436	positive regulation of proteasomal ubiquitin-dependent protein catabolic process	7.13333	0.00282933	0.0344553	14694	Rack1
GO:0032436	positive regulation of proteasomal ubiquitin-dependent protein catabolic process	7.13333	0.00282933	0.0344553	68077	Nop53
GO:0032436	positive regulation of proteasomal ubiquitin-dependent protein catabolic process	7.13333	0.00282933	0.0344553	211770	Trib1
GO:0032436	positive regulation of proteasomal ubiquitin-dependent protein catabolic process	7.13333	0.00282933	0.0344553	20620	Plk2
GO:0030593	neutrophil chemotaxis	7.03947	0.00300553	0.0362524	16963	Xcl1
GO:0030593	neutrophil chemotaxis	7.03947	0.00300553	0.0362524	20310	Cxcl2
GO:0030593	neutrophil chemotaxis	7.03947	0.00300553	0.0362524	20303	Ccl4
GO:0030593	neutrophil chemotaxis	7.03947	0.00300553	0.0362524	16176	Il1b
GO:0030593	neutrophil chemotaxis	7.03947	0.00300553	0.0362524	58217	Trem1
GO:0043525	positive regulation of neuron apoptotic process	7.03947	0.00300553	0.0362524	13653	Egr1
GO:0043525	positive regulation of neuron apoptotic process	7.03947	0.00300553	0.0362524	12569	Cdk5r1
GO:0043525	positive regulation of neuron apoptotic process	7.03947	0.00300553	0.0362524	16176	Il1b
GO:0043525	positive regulation of neuron apoptotic process	7.03947	0.00300553	0.0362524	13198	Ddit3
GO:0043525	positive regulation of neuron apoptotic process	7.03947	0.00300553	0.0362524	14815	Nr3c1
GO:0006635	fatty acid beta-oxidation	9.72727	0.00305246	0.0364712	52538	Acaa2
GO:0006635	fatty acid beta-oxidation	9.72727	0.00305246	0.0364712	11370	Acadvl
GO:0006635	fatty acid beta-oxidation	9.72727	0.00305246	0.0364712	328845	Acsbg2
GO:0006635	fatty acid beta-oxidation	9.72727	0.00305246	0.0364712	18634	Pex7
GO:0010718	positive regulation of epithelial to mesenchymal transition	9.72727	0.00305246	0.0364712	68010	Bambi
GO:0010718	positive regulation of epithelial to mesenchymal transition	9.72727	0.00305246	0.0364712	16176	Il1b
GO:0010718	positive regulation of epithelial to mesenchymal transition	9.72727	0.00305246	0.0364712	20613	Snai1
GO:0010718	positive regulation of epithelial to mesenchymal transition	9.72727	0.00305246	0.0364712	17242	Mdk
GO:0006801	superoxide metabolic process	16.05	0.0032916	0.0375467	14218	Sh3pxd2a
GO:0006801	superoxide metabolic process	16.05	0.0032916	0.0375467	20655	Sod1
GO:0006801	superoxide metabolic process	16.05	0.0032916	0.0375467	12411	Cbs
GO:0009416	response to light stimulus	16.05	0.0032916	0.0375467	18626	Per1
GO:0009416	response to light stimulus	16.05	0.0032916	0.0375467	20893	Bhlhe40
GO:0009416	response to light stimulus	16.05	0.0032916	0.0375467	14599	Gh
GO:0016226	iron-sulfur cluster assembly	16.05	0.0032916	0.0375467	76826	Nubpl
GO:0016226	iron-sulfur cluster assembly	16.05	0.0032916	0.0375467	26425	Nubp1
GO:0016226	iron-sulfur cluster assembly	16.05	0.0032916	0.0375467	216792	Iba57
GO:0030889	negative regulation of B cell proliferation	16.05	0.0032916	0.0375467	16153	Il10
GO:0030889	negative regulation of B cell proliferation	16.05	0.0032916	0.0375467	12477	Ctla4
GO:0030889	negative regulation of B cell proliferation	16.05	0.0032916	0.0375467	217303	Cd300a
GO:0035970	peptidyl-threonine dephosphorylation	16.05	0.0032916	0.0375467	240672	Dusp5
GO:0035970	peptidyl-threonine dephosphorylation	16.05	0.0032916	0.0375467	63953	Dusp10
GO:0035970	peptidyl-threonine dephosphorylation	16.05	0.0032916	0.0375467	19252	Dusp1
GO:0045987	positive regulation of smooth muscle contraction	16.05	0.0032916	0.0375467	13614	Edn1
GO:0045987	positive regulation of smooth muscle contraction	16.05	0.0032916	0.0375467	19225	Ptgs2
GO:0045987	positive regulation of smooth muscle contraction	16.05	0.0032916	0.0375467	12671	Chrm3
GO:0007346	regulation of mitotic cell cycle	9.51111	0.00332567	0.0375467	223775	Pim3
GO:0007346	regulation of mitotic cell cycle	9.51111	0.00332567	0.0375467	73754	Thap1
GO:0007346	regulation of mitotic cell cycle	9.51111	0.00332567	0.0375467	17691	Sik1
GO:0007346	regulation of mitotic cell cycle	9.51111	0.00332567	0.0375467	54124	Cks1b
GO:0008333	endosome to lysosome transport	9.51111	0.00332567	0.0375467	226421	Rab7b
GO:0008333	endosome to lysosome transport	9.51111	0.00332567	0.0375467	170833	Hook2
GO:0008333	endosome to lysosome transport	9.51111	0.00332567	0.0375467	55943	Stx8
GO:0008333	endosome to lysosome transport	9.51111	0.00332567	0.0375467	93711	Pcdhga3
GO:0032722	positive regulation of chemokine production	9.51111	0.00332567	0.0375467	13653	Egr1
GO:0032722	positive regulation of chemokine production	9.51111	0.00332567	0.0375467	66824	Pycard
GO:0032722	positive regulation of chemokine production	9.51111	0.00332567	0.0375467	16176	Il1b
GO:0032722	positive regulation of chemokine production	9.51111	0.00332567	0.0375467	80795	Selenok
GO:0048469	cell maturation	9.51111	0.00332567	0.0375467	107993	Bfsp2
GO:0048469	cell maturation	9.51111	0.00332567	0.0375467	20681	Sox8
GO:0048469	cell maturation	9.51111	0.00332567	0.0375467	15902	Id2
GO:0048469	cell maturation	9.51111	0.00332567	0.0375467	16147	Ihh
GO:0000278	mitotic cell cycle	5.48718	0.00339351	0.0375467	14579	Gem
GO:0000278	mitotic cell cycle	5.48718	0.00339351	0.0375467	103768	Tubg2
GO:0000278	mitotic cell cycle	5.48718	0.00339351	0.0375467	69654	Dctn2
GO:0000278	mitotic cell cycle	5.48718	0.00339351	0.0375467	23922	Jtb
GO:0000278	mitotic cell cycle	5.48718	0.00339351	0.0375467	218630	Ccno
GO:0000278	mitotic cell cycle	5.48718	0.00339351	0.0375467	20620	Plk2
GO:0051897	positive regulation of protein kinase B signaling	5.48718	0.00339351	0.0375467	24064	Spry2
GO:0051897	positive regulation of protein kinase B signaling	5.48718	0.00339351	0.0375467	15442	Hpse
GO:0051897	positive regulation of protein kinase B signaling	5.48718	0.00339351	0.0375467	12261	C1qbp
GO:0051897	positive regulation of protein kinase B signaling	5.48718	0.00339351	0.0375467	320664	Cass4
GO:0051897	positive regulation of protein kinase B signaling	5.48718	0.00339351	0.0375467	28106	Mydgf
GO:0051897	positive regulation of protein kinase B signaling	5.48718	0.00339351	0.0375467	22340	Vegfb
GO:0006552	leucine catabolic process	42.8	0.00342412	0.0375467	12041	Bckdk
GO:0006552	leucine catabolic process	42.8	0.00342412	0.0375467	78038	Mccc2
GO:0007000	nucleolus organization	42.8	0.00342412	0.0375467	64934	Pes1
GO:0007000	nucleolus organization	42.8	0.00342412	0.0375467	20085	Rps19
GO:0060266	negative regulation of respiratory burst involved in inflammatory response	42.8	0.00342412	0.0375467	63953	Dusp10
GO:0060266	negative regulation of respiratory burst involved in inflammatory response	42.8	0.00342412	0.0375467	20085	Rps19
GO:0060298	positive regulation of sarcomere organization	42.8	0.00342412	0.0375467	13614	Edn1
GO:0060298	positive regulation of sarcomere organization	42.8	0.00342412	0.0375467	12154	Bmp10
GO:0070094	positive regulation of glucagon secretion	42.8	0.00342412	0.0375467	107221	Ffar4
GO:0070094	positive regulation of glucagon secretion	42.8	0.00342412	0.0375467	18508	Pax6
GO:1902255	positive regulation of intrinsic apoptotic signaling pathway by p53 class mediator	42.8	0.00342412	0.0375467	67025	Rpl11
GO:1902255	positive regulation of intrinsic apoptotic signaling pathway by p53 class mediator	42.8	0.00342412	0.0375467	22187	Ubb
GO:2000435	negative regulation of protein neddylation	42.8	0.00342412	0.0375467	67025	Rpl11
GO:2000435	negative regulation of protein neddylation	42.8	0.00342412	0.0375467	66915	Cops9
GO:0060021	roof of mouth development	6.77215	0.00358342	0.0389562	99929	Tiparp
GO:0060021	roof of mouth development	6.77215	0.00358342	0.0389562	20613	Snai1
GO:0060021	roof of mouth development	6.77215	0.00358342	0.0389562	68083	Pak1ip1
GO:0060021	roof of mouth development	6.77215	0.00358342	0.0389562	242509	Bnc2
GO:0060021	roof of mouth development	6.77215	0.00358342	0.0389562	231070	Insig1
GO:0060041	retina development in camera-type eye	6.77215	0.00358342	0.0389562	18508	Pax6
GO:0060041	retina development in camera-type eye	6.77215	0.00358342	0.0389562	14685	Gnat1
GO:0060041	retina development in camera-type eye	6.77215	0.00358342	0.0389562	56612	Pfdn5
GO:0060041	retina development in camera-type eye	6.77215	0.00358342	0.0389562	21815	Tgif1
GO:0060041	retina development in camera-type eye	6.77215	0.00358342	0.0389562	20681	Sox8
GO:0043124	negative regulation of I-kappaB kinase/NF-kappaB signaling	9.30435	0.00361567	0.0389723	21929	Tnfaip3
GO:0043124	negative regulation of I-kappaB kinase/NF-kappaB signaling	9.30435	0.00361567	0.0389723	66824	Pycard
GO:0043124	negative regulation of I-kappaB kinase/NF-kappaB signaling	9.30435	0.00361567	0.0389723	18626	Per1
GO:0043124	negative regulation of I-kappaB kinase/NF-kappaB signaling	9.30435	0.00361567	0.0389723	26390	Mapkbp1
GO:0051898	negative regulation of protein kinase B signaling	9.30435	0.00361567	0.0389723	68077	Nop53
GO:0051898	negative regulation of protein kinase B signaling	9.30435	0.00361567	0.0389723	13198	Ddit3
GO:0051898	negative regulation of protein kinase B signaling	9.30435	0.00361567	0.0389723	16600	Klf4
GO:0051898	negative regulation of protein kinase B signaling	9.30435	0.00361567	0.0389723	14694	Rack1
GO:0045104	intermediate filament cytoskeleton organization	15.2857	0.00381361	0.040759	16668	Krt18
GO:0045104	intermediate filament cytoskeleton organization	15.2857	0.00381361	0.040759	14027	Evpl
GO:0045104	intermediate filament cytoskeleton organization	15.2857	0.00381361	0.040759	107993	Bfsp2
GO:0050709	negative regulation of protein secretion	15.2857	0.00381361	0.040759	27414	Sergef
GO:0050709	negative regulation of protein secretion	15.2857	0.00381361	0.040759	16160	Il12b
GO:0050709	negative regulation of protein secretion	15.2857	0.00381361	0.040759	105638	Dph3
GO:0006260	DNA replication	5.35	0.00387141	0.0410305	110749	Chaf1b
GO:0006260	DNA replication	5.35	0.00387141	0.0410305	20899	Stra8
GO:0006260	DNA replication	5.35	0.00387141	0.0410305	19718	Rfc2
GO:0006260	DNA replication	5.35	0.00387141	0.0410305	50927	Nasp
GO:0006260	DNA replication	5.35	0.00387141	0.0410305	272158	Poln
GO:0006260	DNA replication	5.35	0.00387141	0.0410305	14156	Fen1
GO:0061844	antimicrobial humoral immune response mediated by antimicrobial peptide	5.35	0.00387141	0.0410305	16963	Xcl1
GO:0061844	antimicrobial humoral immune response mediated by antimicrobial peptide	5.35	0.00387141	0.0410305	20310	Cxcl2
GO:0061844	antimicrobial humoral immune response mediated by antimicrobial peptide	5.35	0.00387141	0.0410305	67248	Rpl39
GO:0061844	antimicrobial humoral immune response mediated by antimicrobial peptide	5.35	0.00387141	0.0410305	14109	Fau
GO:0061844	antimicrobial humoral immune response mediated by antimicrobial peptide	5.35	0.00387141	0.0410305	20085	Rps19
GO:0061844	antimicrobial humoral immune response mediated by antimicrobial peptide	5.35	0.00387141	0.0410305	19946	Rpl30
GO:0007050	cell cycle arrest	6.52439	0.00424013	0.0445654	11785	Apbb1
GO:0007050	cell cycle arrest	6.52439	0.00424013	0.0445654	27103	Eif2ak4
GO:0007050	cell cycle arrest	6.52439	0.00424013	0.0445654	16160	Il12b
GO:0007050	cell cycle arrest	6.52439	0.00424013	0.0445654	13197	Gadd45a
GO:0007050	cell cycle arrest	6.52439	0.00424013	0.0445654	13198	Ddit3
GO:0040008	regulation of growth	6.52439	0.00424013	0.0445654	71839	Osgin1
GO:0040008	regulation of growth	6.52439	0.00424013	0.0445654	16147	Ihh
GO:0040008	regulation of growth	6.52439	0.00424013	0.0445654	240514	Ccdc85b
GO:0040008	regulation of growth	6.52439	0.00424013	0.0445654	12702	Socs3
GO:0040008	regulation of growth	6.52439	0.00424013	0.0445654	14694	Rack1
GO:0006468	protein phosphorylation	2.63732	0.00434554	0.0454845	140859	Nek8
GO:0006468	protein phosphorylation	2.63732	0.00434554	0.0454845	223775	Pim3
GO:0006468	protein phosphorylation	2.63732	0.00434554	0.0454845	27103	Eif2ak4
GO:0006468	protein phosphorylation	2.63732	0.00434554	0.0454845	22367	Vrk1
GO:0006468	protein phosphorylation	2.63732	0.00434554	0.0454845	20811	Srms
GO:0006468	protein phosphorylation	2.63732	0.00434554	0.0454845	12041	Bckdk
GO:0006468	protein phosphorylation	2.63732	0.00434554	0.0454845	211770	Trib1
GO:0006468	protein phosphorylation	2.63732	0.00434554	0.0454845	17691	Sik1
GO:0006468	protein phosphorylation	2.63732	0.00434554	0.0454845	18712	Pim1
GO:0006468	protein phosphorylation	2.63732	0.00434554	0.0454845	101320	Dyrk4
GO:0006468	protein phosphorylation	2.63732	0.00434554	0.0454845	17179	Matk
GO:0006468	protein phosphorylation	2.63732	0.00434554	0.0454845	116904	Alpk3
GO:0006468	protein phosphorylation	2.63732	0.00434554	0.0454845	20620	Plk2
GO:0006468	protein phosphorylation	2.63732	0.00434554	0.0454845	50523	Lats2
GO:0002028	regulation of sodium ion transport	14.5909	0.0043852	0.0455235	80297	Sptbn4
GO:0002028	regulation of sodium ion transport	14.5909	0.0043852	0.0455235	17691	Sik1
GO:0002028	regulation of sodium ion transport	14.5909	0.0043852	0.0455235	18626	Per1
GO:0010499	proteasomal ubiquitin-independent protein catabolic process	14.5909	0.0043852	0.0455235	19172	Psmb4
GO:0010499	proteasomal ubiquitin-independent protein catabolic process	14.5909	0.0043852	0.0455235	73902	Psmb11
GO:0010499	proteasomal ubiquitin-independent protein catabolic process	14.5909	0.0043852	0.0455235	26444	Psma7
GO:0045087	innate immune response	2.60976	0.00479515	0.049576	100689	Spon2
GO:0045087	innate immune response	2.60976	0.00479515	0.049576	432940	Otulin
GO:0045087	innate immune response	2.60976	0.00479515	0.049576	16365	Acod1
GO:0045087	innate immune response	2.60976	0.00479515	0.049576	216799	Nlrp3
GO:0045087	innate immune response	2.60976	0.00479515	0.049576	20811	Srms
GO:0045087	innate immune response	2.60976	0.00479515	0.049576	192231	Hexim1
GO:0045087	innate immune response	2.60976	0.00479515	0.049576	269855	Ssc5d
GO:0045087	innate immune response	2.60976	0.00479515	0.049576	332579	Card9
GO:0045087	innate immune response	2.60976	0.00479515	0.049576	101700	Trim68
GO:0045087	innate immune response	2.60976	0.00479515	0.049576	80876	Ifitm2
GO:0045087	innate immune response	2.60976	0.00479515	0.049576	71660	Rarres2
GO:0045087	innate immune response	2.60976	0.00479515	0.049576	66824	Pycard
GO:0045087	innate immune response	2.60976	0.00479515	0.049576	17089	Lyar
GO:0045087	innate immune response	2.60976	0.00479515	0.049576	12261	C1qbp
GO:0071560	cellular response to transforming growth factor beta stimulus	8.56	0.0049547	0.0509028	56330	Pdcd5
GO:0071560	cellular response to transforming growth factor beta stimulus	8.56	0.0049547	0.0509028	16963	Xcl1
GO:0071560	cellular response to transforming growth factor beta stimulus	8.56	0.0049547	0.0509028	80707	Wwox
GO:0071560	cellular response to transforming growth factor beta stimulus	8.56	0.0049547	0.0509028	14815	Nr3c1
GO:0009952	anterior/posterior pattern specification	5.09524	0.00498092	0.0509028	18508	Pax6
GO:0009952	anterior/posterior pattern specification	5.09524	0.00498092	0.0509028	11838	Arc
GO:0009952	anterior/posterior pattern specification	5.09524	0.00498092	0.0509028	22658	Pcgf2
GO:0009952	anterior/posterior pattern specification	5.09524	0.00498092	0.0509028	20893	Bhlhe40
GO:0009952	anterior/posterior pattern specification	5.09524	0.00498092	0.0509028	12592	Cdx4
GO:0009952	anterior/posterior pattern specification	5.09524	0.00498092	0.0509028	19763	Ring1
GO:0017183	peptidyl-diphthamide biosynthetic process from peptidyl-histidine	35.6667	0.00510435	0.0509028	105638	Dph3
GO:0017183	peptidyl-diphthamide biosynthetic process from peptidyl-histidine	35.6667	0.00510435	0.0509028	116905	Dph1
GO:0031630	regulation of synaptic vesicle fusion to presynaptic active zone membrane	35.6667	0.00510435	0.0509028	235415	Cplx3
GO:0031630	regulation of synaptic vesicle fusion to presynaptic active zone membrane	35.6667	0.00510435	0.0509028	12890	Cplx2
GO:0032602	chemokine production	35.6667	0.00510435	0.0509028	14728	Lilrb4a
GO:0032602	chemokine production	35.6667	0.00510435	0.0509028	58217	Trem1
GO:0034080	CENP-A containing nucleosome assembly	35.6667	0.00510435	0.0509028	50927	Nasp
GO:0034080	CENP-A containing nucleosome assembly	35.6667	0.00510435	0.0509028	67733	Itgb3bp
GO:0050917	sensory perception of umami taste	35.6667	0.00510435	0.0509028	14685	Gnat1
GO:0050917	sensory perception of umami taste	35.6667	0.00510435	0.0509028	110326	Tas1r1
GO:0051771	negative regulation of nitric-oxide synthase biosynthetic process	35.6667	0.00510435	0.0509028	109815	Selenos
GO:0051771	negative regulation of nitric-oxide synthase biosynthetic process	35.6667	0.00510435	0.0509028	13614	Edn1
GO:2000556	positive regulation of T-helper 1 cell cytokine production	35.6667	0.00510435	0.0509028	16963	Xcl1
GO:2000556	positive regulation of T-helper 1 cell cytokine production	35.6667	0.00510435	0.0509028	16176	Il1b
GO:0016055	Wnt signaling pathway	3.80444	0.0054724	0.0543592	234130	Dkk4
GO:0016055	Wnt signaling pathway	3.80444	0.0054724	0.0543592	207742	Rnf43
[truncated: 3,237 more rows]

## Sheet: 下调基因显著性功能
go_id	go_name	go_diffgene_count	go_gene_count	enrichment	pvalue	FDR
GO:0006357	regulation of transcription by RNA polymerase II	85	1493	5.92688	8.85722e-39	2.43131e-35
GO:0002376	immune system process	41	491	8.693	5.01095e-25	6.87753e-22
GO:0051607	defense response to virus	28	184	15.8419	1.82977e-24	1.67424e-21
GO:0045087	innate immune response	43	574	7.79873	2.45662e-24	1.68585e-21
GO:0035458	cellular response to interferon-beta	16	47	35.4397	2.02333e-20	1.11081e-17
GO:0045944	positive regulation of transcription by RNA polymerase II	46	1160	4.12826	4.88825e-15	2.23637e-12
GO:0007165	signal transduction	46	1167	4.1035	6.09027e-15	2.38826e-12
GO:0006355	regulation of transcription, DNA-templated	41	1065	4.00776	4.6798e-13	1.60576e-10
GO:0000122	negative regulation of transcription by RNA polymerase II	37	888	4.33767	7.29693e-13	2.22556e-10
GO:0043065	positive regulation of apoptotic process	23	356	6.72582	5.08226e-12	1.25322e-09
GO:0006954	inflammatory response	23	357	6.70698	5.38393e-12	1.25322e-09
GO:0032755	positive regulation of interleukin-6 production	14	102	14.2888	5.47857e-12	1.25322e-09
GO:0050821	protein stabilization	17	181	9.77772	1.20571e-11	2.54591e-09
GO:0009617	response to bacterium	20	277	7.51653	1.98589e-11	3.89376e-09
GO:0009615	response to virus	11	60	19.0857	5.31997e-11	9.73554e-09
GO:0010628	positive regulation of gene expression	25	537	4.84655	6.34496e-10	1.08856e-07
GO:0030154	cell differentiation	34	992	3.56808	1.26162e-09	2.03715e-07
GO:0032760	positive regulation of tumor necrosis factor production	12	102	12.2475	1.38316e-09	2.10933e-07
GO:0006952	defense response	13	135	10.0248	3.18361e-09	4.59948e-07
GO:0007275	multicellular organism development	35	1096	3.32449	4.37625e-09	6.0064e-07
GO:0032727	positive regulation of interferon-alpha production	7	23	31.6838	6.28506e-09	8.21547e-07
GO:0006955	immune response	20	385	5.408	6.71672e-09	8.38063e-07
GO:0008285	negative regulation of cell proliferation	20	396	5.25778	1.08522e-08	1.29518e-06
GO:0007049	cell cycle	25	621	4.19098	1.22515e-08	1.40126e-06
GO:0045892	negative regulation of transcription, DNA-templated	23	541	4.42586	1.89862e-08	2.08469e-06
GO:0045893	positive regulation of transcription, DNA-templated	24	619	4.03634	5.16966e-08	5.41889e-06
GO:0015031	protein transport	24	620	4.02983	5.33006e-08	5.41889e-06
GO:0051865	protein autoubiquitination	9	72	13.013	1.3144e-07	1.27488e-05
GO:0050830	defense response to Gram-positive bacterium	12	152	8.21874	1.34686e-07	1.27488e-05
GO:0034145	positive regulation of toll-like receptor 4 signaling pathway	5	11	47.32	1.4205e-07	1.29976e-05
GO:0032757	positive regulation of interleukin-8 production	8	53	15.7138	1.68796e-07	1.49466e-05
GO:0032728	positive regulation of interferon-beta production	7	36	20.2424	1.92034e-07	1.64729e-05
GO:0006935	chemotaxis	11	131	8.74156	2.66148e-07	2.21387e-05
GO:0006974	cellular response to DNA damage stimulus	20	485	4.29295	3.1071e-07	2.50853e-05
GO:0007189	adenylate cyclase-activating G protein-coupled receptor signaling pathway	10	111	9.37874	5.41712e-07	4.24857e-05
GO:0006468	protein phosphorylation	21	568	3.84892	9.06917e-07	6.91524e-05
GO:0043407	negative regulation of MAP kinase activity	7	45	16.194	9.68598e-07	7.18595e-05
GO:0007166	cell surface receptor signaling pathway	12	187	6.68047	1.30064e-06	9.39538e-05
GO:0006629	lipid metabolic process	20	539	3.86286	1.65433e-06	0.000116439
GO:0043066	negative regulation of apoptotic process	20	551	3.77873	2.32843e-06	0.000159788
GO:0007204	positive regulation of cytosolic calcium ion concentration	11	171	6.69675	3.91537e-06	0.00026023
GO:0007399	nervous system development	17	422	4.19376	3.98166e-06	0.00026023
GO:0032729	positive regulation of interferon-gamma production	8	80	10.4104	4.39683e-06	0.000276828
GO:0002063	chondrocyte development	5	20	26.026	4.43732e-06	0.000276828
GO:0043161	proteasome-mediated ubiquitin-dependent protein catabolic process	11	175	6.54368	4.91556e-06	0.000299849
GO:0032940	secretion by cell	4	10	41.6416	6.7726e-06	0.000404147
GO:0006869	lipid transport	9	119	7.87341	1.00115e-05	0.000584713
GO:0016567	protein ubiquitination	14	319	4.56883	1.33271e-05	0.000752179
GO:0010468	regulation of gene expression	17	462	3.83067	1.34269e-05	0.000752179
GO:0006281	DNA repair	15	369	4.23187	1.52803e-05	0.000838886
GO:0007155	cell adhesion	19	574	3.44595	1.68202e-05	0.00090532
GO:0006915	apoptotic process	19	575	3.43996	1.72418e-05	0.00091017
GO:0030308	negative regulation of cell growth	9	128	7.31981	1.82793e-05	0.000946728
GO:0051301	cell division	15	379	4.12021	2.1068e-05	0.00107096
GO:0055085	transmembrane transport	16	432	3.8557	2.3851e-05	0.00119038
GO:0030335	positive regulation of cell migration	12	251	4.97708	2.80339e-05	0.00137416
GO:0051260	protein homooligomerization	8	105	7.93173	3.42756e-05	0.00164695
GO:2000646	positive regulation of receptor catabolic process	3	5	62.4624	3.47989e-05	0.00164695
GO:0071222	cellular response to lipopolysaccharide	12	258	4.84205	3.69764e-05	0.00172034
GO:0007411	axon guidance	10	179	5.81587	4.22827e-05	0.0019296
GO:0060348	bone development	7	78	9.34267	4.28799e-05	0.0019296
GO:0006631	fatty acid metabolic process	10	186	5.59699	5.9026e-05	0.00260101
GO:0040008	regulation of growth	7	82	8.88693	5.96953e-05	0.00260101
GO:0051085	chaperone cofactor-dependent protein refolding	5	33	15.7733	6.12627e-05	0.0026276
GO:0060326	cell chemotaxis	7	83	8.77985	6.46562e-05	0.00273048
GO:0060760	positive regulation of response to cytokine stimulus	3	6	52.052	6.9099e-05	0.00287389
GO:0035335	peptidyl-tyrosine dephosphorylation	5	34	15.3094	7.12579e-05	0.00289436
GO:0035269	protein O-linked mannosylation	4	17	24.4951	7.27544e-05	0.00289436
GO:0071360	cellular response to exogenous dsRNA	4	17	24.4951	7.27544e-05	0.00289436
GO:0032496	response to lipopolysaccharide	8	117	7.11822	7.58024e-05	0.00297254
GO:0010977	negative regulation of neuron projection development	7	86	8.47358	8.16235e-05	0.00314446
GO:0035025	positive regulation of Rho protein signal transduction	5	35	14.872	8.24778e-05	0.00314446
GO:0045088	regulation of innate immune response	4	18	23.1342	9.28295e-05	0.00344347
GO:0048384	retinoic acid receptor signaling pathway	4	18	23.1342	9.28295e-05	0.00344347
GO:0042832	defense response to protozoan	5	36	14.4589	9.50244e-05	0.00347789
GO:0051482	positive regulation of cytosolic calcium ion concentration involved in phospholipase C-activating G protein-coupled signaling pathway	5	37	14.0681	0.000109005	0.00393708
GO:0010544	negative regulation of platelet activation	3	7	44.616	0.000120057	0.00422508
GO:0034141	positive regulation of toll-like receptor 3 signaling pathway	3	7	44.616	0.000120057	0.00422508
GO:0071902	positive regulation of protein serine/threonine kinase activity	5	38	13.6979	0.00012453	0.00432702
GO:0006826	iron ion transport	4	20	20.8208	0.000144753	0.00480364
GO:0043254	regulation of protein complex assembly	4	20	20.8208	0.000144753	0.00480364
GO:2001224	positive regulation of neuron migration	4	20	20.8208	0.000144753	0.00480364
GO:0050804	modulation of chemical synaptic transmission	7	94	7.75242	0.00014554	0.00480364
GO:0000209	protein polyubiquitination	9	166	5.64419	0.000146997	0.00480364
GO:0006511	ubiquitin-dependent protein catabolic process	11	252	4.54422	0.000154505	0.0049896
GO:0050766	positive regulation of phagocytosis	6	65	9.6096	0.000157029	0.00501214
GO:0007616	long-term memory	5	40	13.013	0.000160684	0.00506985
GO:0019221	cytokine-mediated signaling pathway	8	131	6.3575	0.000171008	0.00533427
GO:0002224	toll-like receptor signaling pathway	4	21	19.8293	0.000177453	0.00543465
GO:0071346	cellular response to interferon-gamma	7	97	7.51266	0.000178185	0.00543465
GO:0006914	autophagy	9	174	5.38469	0.000212022	0.00639562
GO:0060384	innervation	4	22	18.928	0.000215238	0.00642205
GO:0016477	cell migration	11	266	4.30505	0.000251304	0.00740144
GO:0097191	extrinsic apoptotic signaling pathway	5	44	11.83	0.000256936	0.00740144
GO:0061077	chaperone-mediated protein folding	4	23	18.105	0.000258572	0.00740144
GO:0002244	hematopoietic progenitor cell differentiation	7	103	7.07503	0.000261544	0.00740144
GO:0006457	protein folding	7	103	7.07503	0.000261544	0.00740144
GO:0016310	phosphorylation	17	587	3.01494	0.000279546	0.00783013
GO:0006487	protein N-linked glycosylation	5	46	11.3157	0.000319214	0.00876243
GO:0032526	response to retinoic acid	5	46	11.3157	0.000319214	0.00876243
GO:0001932	regulation of protein phosphorylation	6	74	8.44086	0.00032739	0.00889789
GO:0006470	protein dephosphorylation	8	144	5.78355	0.0003336	0.00897777
GO:0033344	cholesterol efflux	4	25	16.6566	0.000363799	0.0094552
GO:0035781	CD86 biosynthetic process	2	2	104.104	0.000368563	0.0094552
GO:0045634	regulation of melanocyte differentiation	2	2	104.104	0.000368563	0.0094552
GO:1902216	positive regulation of interleukin-4-mediated signaling pathway	2	2	104.104	0.000368563	0.0094552
GO:1904161	DNA synthesis involved in UV-damage excision repair	2	2	104.104	0.000368563	0.0094552
GO:0010745	negative regulation of macrophage derived foam cell differentiation	3	10	31.2312	0.000402849	0.0101132
GO:0061635	regulation of protein complex stability	3	10	31.2312	0.000402849	0.0101132
GO:0019233	sensory perception of pain	6	77	8.112	0.000408951	0.0101132
GO:0034976	response to endoplasmic reticulum stress	6	77	8.112	0.000408951	0.0101132
GO:0051092	positive regulation of NF-kappaB transcription factor activity	8	149	5.58948	0.000423262	0.0103737
GO:0007169	transmembrane receptor protein tyrosine kinase signaling pathway	7	112	6.5065	0.000444012	0.0107859
GO:0001934	positive regulation of protein phosphorylation	10	240	4.33767	0.000504104	0.0121383
GO:0051216	cartilage development	6	81	7.71141	0.000541945	0.0129028
GO:0010656	negative regulation of muscle cell apoptotic process	3	11	28.392	0.000549957	0.0129028
GO:0033700	phospholipid efflux	3	11	28.392	0.000549957	0.0129028
GO:0098609	cell-cell adhesion	8	155	5.37311	0.000556269	0.0129403
GO:0019933	cAMP-mediated signaling	4	28	14.872	0.000575533	0.0132036
GO:0050714	positive regulation of protein secretion	5	52	10.01	0.000577208	0.0132036
GO:0016192	vesicle-mediated transport	10	246	4.23187	0.000616091	0.0138858
GO:0006986	response to unfolded protein	5	53	9.82113	0.000632322	0.0138858
GO:0042307	positive regulation of protein import into nucleus	5	53	9.82113	0.000632322	0.0138858
GO:0045600	positive regulation of fat cell differentiation	5	53	9.82113	0.000632322	0.0138858
GO:0048705	skeletal system morphogenesis	5	53	9.82113	0.000632322	0.0138858
GO:0043122	regulation of I-kappaB kinase/NF-kappaB signaling	4	29	14.3592	0.000662555	0.0143206
GO:0046718	viral entry into host cell	4	29	14.3592	0.000662555	0.0143206
GO:0043123	positive regulation of I-kappaB kinase/NF-kappaB signaling	7	122	5.97318	0.000756059	0.0162139
GO:0032880	regulation of protein localization	6	88	7.098	0.000855151	0.0180568
GO:0042632	cholesterol homeostasis	6	88	7.098	0.000855151	0.0180568
GO:0009952	anterior/posterior pattern specification	7	126	5.78355	0.000922145	0.0192495
GO:0035556	intracellular signal transduction	13	416	3.25325	0.000937134	0.0192495
GO:0043691	reverse cholesterol transport	3	13	24.024	0.000939685	0.0192495
GO:0060340	positive regulation of type I interferon-mediated signaling pathway	3	13	24.024	0.000939685	0.0192495
GO:0061098	positive regulation of protein tyrosine kinase activity	4	32	13.013	0.000980502	0.0199369
GO:0010976	positive regulation of neuron projection development	8	171	4.87036	0.00108702	0.0208476
GO:0002305	CD8-positive, gamma-delta intraepithelial T cell differentiation	2	3	69.4027	0.00109863	0.0208476
GO:0019062	virion attachment to host cell	2	3	69.4027	0.00109863	0.0208476
GO:0034140	negative regulation of toll-like receptor 3 signaling pathway	2	3	69.4027	0.00109863	0.0208476
GO:0046331	lateral inhibition	2	3	69.4027	0.00109863	0.0208476
GO:0071403	cellular response to high density lipoprotein particle stimulus	2	3	69.4027	0.00109863	0.0208476
GO:1900135	positive regulation of renin secretion into blood stream	2	3	69.4027	0.00109863	0.0208476
GO:1904694	negative regulation of vascular smooth muscle contraction	2	3	69.4027	0.00109863	0.0208476
GO:0002218	activation of innate immune response	4	33	12.6187	0.00110729	0.0208476
GO:0002230	positive regulation of defense response to virus by host	4	33	12.6187	0.00110729	0.0208476
GO:0035264	multicellular organism growth	7	130	5.6056	0.00111643	0.0208476
GO:0051726	regulation of cell cycle	7	130	5.6056	0.00111643	0.0208476
GO:0032367	intracellular cholesterol transport	3	14	22.308	0.00118742	0.0218757
GO:0044319	wound healing, spreading of cells	3	14	22.308	0.00118742	0.0218757
GO:1904646	cellular response to amyloid-beta	4	34	12.2475	0.00124543	0.0227914
GO:0006302	double-strand break repair	5	62	8.39548	0.00132817	0.0239857
GO:0032720	negative regulation of tumor necrosis factor production	5	62	8.39548	0.00132817	0.0239857
GO:0015914	phospholipid transport	4	35	11.8976	0.00139549	0.0250367
GO:0070374	positive regulation of ERK1 and ERK2 cascade	9	224	4.18275	0.00141664	0.0252511
GO:0006968	cellular defense response	3	15	20.8208	0.00147369	0.0257661
GO:0030195	negative regulation of blood coagulation	3	15	20.8208	0.00147369	0.0257661
GO:0060100	positive regulation of phagocytosis, engulfment	3	15	20.8208	0.00147369	0.0257661
GO:0016525	negative regulation of angiogenesis	6	98	6.37371	0.00153214	0.0266186
GO:0050919	negative chemotaxis	4	36	11.5671	0.00155805	0.0268984
GO:0008643	carbohydrate transport	4	37	11.2545	0.00173369	0.0295589
GO:0071526	semaphorin-plexin signaling pathway	4	37	11.2545	0.00173369	0.0295589
GO:0005975	carbohydrate metabolic process	8	184	4.52626	0.00177417	0.0297788
GO:0008203	cholesterol metabolic process	6	101	6.1844	0.00180059	0.0297788
GO:0002021	response to dietary excess	3	16	19.5195	0.00180083	0.0297788
GO:0014067	negative regulation of phosphatidylinositol 3-kinase signaling	3	16	19.5195	0.00180083	0.0297788
GO:0032611	interleukin-1 beta production	3	16	19.5195	0.00180083	0.0297788
GO:0043085	positive regulation of catalytic activity	4	39	10.6773	0.00212658	0.0329285
GO:0002024	diet induced thermogenesis	3	17	18.3713	0.00217113	0.0329285
GO:0007004	telomere maintenance via telomerase	3	17	18.3713	0.00217113	0.0329285
GO:0018279	protein N-linked glycosylation via asparagine	3	17	18.3713	0.00217113	0.0329285
GO:0030595	leukocyte chemotaxis	3	17	18.3713	0.00217113	0.0329285
GO:0060337	type I interferon signaling pathway	3	17	18.3713	0.00217113	0.0329285
GO:0061564	axon development	3	17	18.3713	0.00217113	0.0329285
GO:0002215	defense response to nematode	2	4	52.052	0.00218324	0.0329285
GO:0031323	regulation of cellular metabolic process	2	4	52.052	0.00218324	0.0329285
GO:0032878	regulation of establishment or maintenance of cell polarity	2	4	52.052	0.00218324	0.0329285
GO:0046642	negative regulation of alpha-beta T cell proliferation	2	4	52.052	0.00218324	0.0329285
GO:0048194	Golgi vesicle budding	2	4	52.052	0.00218324	0.0329285
GO:0072577	endothelial cell apoptotic process	2	4	52.052	0.00218324	0.0329285
GO:0098773	skin epidermis development	2	4	52.052	0.00218324	0.0329285
GO:0106071	positive regulation of adenylate cyclase-activating G protein-coupled receptor signaling pathway	2	4	52.052	0.00218324	0.0329285
GO:1905323	telomerase holoenzyme complex assembly	2	4	52.052	0.00218324	0.0329285
GO:0003007	heart morphogenesis	5	70	7.436	0.00233258	0.0347949
GO:0019722	calcium-mediated signaling	5	70	7.436	0.00233258	0.0347949
GO:0014911	positive regulation of smooth muscle cell migration	4	40	10.4104	0.00234501	0.0347949
GO:0016311	dephosphorylation	6	108	5.78355	0.0025696	0.0373724
GO:0007257	activation of JUN kinase activity	4	41	10.1565	0.0025789	0.0373724
GO:0009966	regulation of signal transduction	4	41	10.1565	0.0025789	0.0373724
GO:0032793	positive regulation of CREB transcription factor activity	3	18	17.3507	0.0025868	0.0373724
GO:0050872	white fat cell differentiation	3	18	17.3507	0.0025868	0.0373724
GO:0000723	telomere maintenance	4	42	9.91467	0.00282884	0.0400266
GO:0043491	protein kinase B signaling	4	42	9.91467	0.00282884	0.0400266
GO:0045071	negative regulation of viral genome replication	4	42	9.91467	0.00282884	0.0400266
GO:1900026	positive regulation of substrate adhesion-dependent cell spreading	4	42	9.91467	0.00282884	0.0400266
GO:0045766	positive regulation of angiogenesis	7	152	4.79426	0.00285243	0.0401535
GO:0043547	positive regulation of GTPase activity	7	153	4.76293	0.00296481	0.0413558
GO:0045666	positive regulation of neuron differentiation	6	111	5.62724	0.00296798	0.0413558
GO:0045669	positive regulation of osteoblast differentiation	5	74	7.03405	0.00300853	0.0414996
GO:0045732	positive regulation of protein catabolic process	5	74	7.03405	0.00300853	0.0414996
GO:0060749	mammary gland alveolus development	3	19	16.4375	0.00304994	0.0418604
GO:0042742	defense response to bacterium	10	303	3.43578	0.00316344	0.0432023
GO:0030217	T cell differentiation	4	44	9.464	0.00337928	0.0457356
GO:0030334	regulation of cell migration	6	114	5.47916	0.00341245	0.0457356
GO:0051443	positive regulation of ubiquitin-protein transferase activity	3	20	15.6156	0.00356262	0.0457356
GO:0051642	centrosome localization	3	20	15.6156	0.00356262	0.0457356
GO:1902004	positive regulation of amyloid-beta formation	3	20	15.6156	0.00356262	0.0457356
GO:1902430	negative regulation of amyloid-beta formation	3	20	15.6156	0.00356262	0.0457356
GO:0007623	circadian rhythm	5	77	6.76	0.00360415	0.0457356
GO:0009597	detection of virus	2	5	41.6416	0.00361553	0.0457356
GO:0010706	ganglioside biosynthetic process via lactosylceramide	2	5	41.6416	0.00361553	0.0457356
GO:0010742	macrophage derived foam cell differentiation	2	5	41.6416	0.00361553	0.0457356
GO:0031581	hemidesmosome assembly	2	5	41.6416	0.00361553	0.0457356
GO:0034767	positive regulation of ion transmembrane transport	2	5	41.6416	0.00361553	0.0457356
GO:0035973	aggrephagy	2	5	41.6416	0.00361553	0.0457356
GO:0045053	protein retention in Golgi apparatus	2	5	41.6416	0.00361553	0.0457356
GO:1904719	positive regulation of AMPA glutamate receptor clustering	2	5	41.6416	0.00361553	0.0457356
GO:2000436	positive regulation of protein neddylation	2	5	41.6416	0.00361553	0.0457356
GO:0045596	negative regulation of cell differentiation	4	45	9.25369	0.00368099	0.0463501
GO:0007219	Notch signaling pathway	6	116	5.38469	0.0037361	0.0466164
GO:0050829	defense response to Gram-negative bacterium	6	116	5.38469	0.0037361	0.0466164
GO:0060021	roof of mouth development	5	79	6.58886	0.0040472	0.0490394
GO:0070373	negative regulation of ERK1 and ERK2 cascade	5	79	6.58886	0.0040472	0.0490394
GO:0008593	regulation of Notch signaling pathway	3	21	14.872	0.00412682	0.0490394
GO:0032481	positive regulation of type I interferon production	3	21	14.872	0.00412682	0.0490394
GO:0032693	negative regulation of interleukin-10 production	3	21	14.872	0.00412682	0.0490394
GO:0042176	regulation of protein catabolic process	3	21	14.872	0.00412682	0.0490394
GO:0045821	positive regulation of glycolytic process	3	21	14.872	0.00412682	0.0490394
GO:0051899	membrane depolarization	3	21	14.872	0.00412682	0.0490394
GO:0060252	positive regulation of glial cell proliferation	3	21	14.872	0.00412682	0.0490394
GO:0097352	autophagosome maturation	3	21	14.872	0.00412682	0.0490394
GO:1900006	positive regulation of dendrite development	3	21	14.872	0.00412682	0.0490394
GO:0007229	integrin-mediated signaling pathway	5	80	6.5065	0.00428329	0.050462
GO:0050729	positive regulation of inflammatory response	5	80	6.5065	0.00428329	0.050462
GO:0007628	adult walking behavior	4	47	8.85991	0.00434039	0.0506995
GO:0120163	negative regulation of cold-induced thermogenesis	4	47	8.85991	0.00434039	0.0506995
GO:0001916	positive regulation of T cell mediated cytotoxicity	4	48	8.67533	0.00469929	0.053816
GO:0045184	establishment of protein localization	4	48	8.67533	0.00469929	0.053816
GO:0007585	respiratory gaseous exchange	3	22	14.196	0.00474443	0.053816
GO:0010875	positive regulation of cholesterol efflux	3	22	14.196	0.00474443	0.053816
GO:0022011	myelination in peripheral nervous system	3	22	14.196	0.00474443	0.053816
GO:0030301	cholesterol transport	3	22	14.196	0.00474443	0.053816
GO:0044772	mitotic cell cycle phase transition	3	22	14.196	0.00474443	0.053816
GO:0050727	regulation of inflammatory response	5	82	6.3478	0.00478589	0.0540628
GO:0001890	placenta development	4	49	8.49828	0.00507846	0.0559042
GO:0007157	heterophilic cell-cell adhesion via plasma membrane cell adhesion molecules	4	49	8.49828	0.00507846	0.0559042
GO:0001915	negative regulation of T cell mediated cytotoxicity	2	6	34.7013	0.00538875	0.0559042
GO:0002735	positive regulation of myeloid dendritic cell cytokine production	2	6	34.7013	0.00538875	0.0559042
GO:0006798	polyphosphate catabolic process	2	6	34.7013	0.00538875	0.0559042
GO:0016556	mRNA modification	2	6	34.7013	0.00538875	0.0559042
GO:0031627	telomeric loop formation	2	6	34.7013	0.00538875	0.0559042
GO:0032479	regulation of type I interferon production	2	6	34.7013	0.00538875	0.0559042
GO:0032489	regulation of Cdc42 protein signal transduction	2	6	34.7013	0.00538875	0.0559042
GO:0036462	TRAIL-activated apoptotic signaling pathway	2	6	34.7013	0.00538875	0.0559042
GO:0042158	lipoprotein biosynthetic process	2	6	34.7013	0.00538875	0.0559042
GO:0045637	regulation of myeloid cell differentiation	2	6	34.7013	0.00538875	0.0559042
GO:0048386	positive regulation of retinoic acid receptor signaling pathway	2	6	34.7013	0.00538875	0.0559042
GO:0050974	detection of mechanical stimulus involved in sensory perception	2	6	34.7013	0.00538875	0.0559042
GO:0060336	negative regulation of interferon-gamma-mediated signaling pathway	2	6	34.7013	0.00538875	0.0559042
GO:0075044	autophagy of host cells involved in interaction with symbiont	2	6	34.7013	0.00538875	0.0559042
GO:0150079	negative regulation of neuroinflammatory response	2	6	34.7013	0.00538875	0.0559042
GO:1902083	negative regulation of peptidyl-cysteine S-nitrosylation	2	6	34.7013	0.00538875	0.0559042
GO:1904894	positive regulation of STAT cascade	2	6	34.7013	0.00538875	0.0559042
GO:2000556	positive regulation of T-helper 1 cell cytokine production	2	6	34.7013	0.00538875	0.0559042
GO:0007095	mitotic G2 DNA damage checkpoint	3	23	13.5788	0.00541731	0.0559042
GO:0043277	apoptotic cell clearance	3	23	13.5788	0.00541731	0.0559042
GO:0048266	behavioral response to pain	3	23	13.5788	0.00541731	0.0559042
GO:0007160	cell-matrix adhesion	5	85	6.12376	0.00561978	0.0577764
GO:0042127	regulation of cell proliferation	8	221	3.76847	0.00580277	0.059435
GO:0030968	endoplasmic reticulum unfolded protein response	4	51	8.16502	0.0059	0.0597455
GO:0051289	protein homotetramerization	4	51	8.16502	0.0059	0.0597455
GO:0042060	wound healing	5	86	6.05256	0.00592014	0.0597455
GO:0046330	positive regulation of JNK cascade	5	86	6.05256	0.00592014	0.0597455
GO:0006471	protein ADP-ribosylation	3	24	13.013	0.00614722	0.0613605
GO:0031643	positive regulation of myelination	3	24	13.013	0.00614722	0.0613605
GO:0045778	positive regulation of ossification	3	24	13.013	0.00614722	0.0613605
GO:0017148	negative regulation of translation	5	87	5.98299	0.00623214	0.0619827
GO:0071333	cellular response to glucose stimulus	4	52	8.008	0.00634356	0.0628631
GO:0001701	in utero embryonic development	10	333	3.12625	0.00639889	0.0631833
GO:0030198	extracellular matrix organization	7	176	4.1405	0.00666943	0.0656186
GO:0032731	positive regulation of interleukin-1 beta production	4	53	7.8569	0.00680979	0.0665227
GO:0034644	cellular response to UV	4	53	7.8569	0.00680979	0.0665227
GO:0007005	mitochondrion organization	5	89	5.84854	0.00689215	0.0670885
GO:0006382	adenosine to inosine editing	2	7	29.744	0.00749622	0.069753
GO:0032682	negative regulation of chemokine production	2	7	29.744	0.00749622	0.069753
GO:0034137	positive regulation of toll-like receptor 2 signaling pathway	2	7	29.744	0.00749622	0.069753
GO:0034351	negative regulation of glial cell apoptotic process	2	7	29.744	0.00749622	0.069753
GO:0035357	peroxisome proliferator activated receptor signaling pathway	2	7	29.744	0.00749622	0.069753
GO:0039529	RIG-I signaling pathway	2	7	29.744	0.00749622	0.069753
GO:0042270	protection from natural killer cell mediated cytotoxicity	2	7	29.744	0.00749622	0.069753
GO:0060335	positive regulation of interferon-gamma-mediated signaling pathway	2	7	29.744	0.00749622	0.069753
GO:0060510	type II pneumocyte differentiation	2	7	29.744	0.00749622	0.069753
GO:0072126	positive regulation of glomerular mesangial cell proliferation	2	7	29.744	0.00749622	0.069753
GO:1900122	positive regulation of receptor binding	2	7	29.744	0.00749622	0.069753
GO:1901098	positive regulation of autophagosome maturation	2	7	29.744	0.00749622	0.069753
GO:1903753	negative regulation of p38MAPK cascade	2	7	29.744	0.00749622	0.069753
GO:0043524	negative regulation of neuron apoptotic process	7	180	4.04849	0.00757561	0.0702535
GO:0007608	sensory perception of smell	2	1139	0.182799	0.00791882	0.0731891
GO:0046777	protein autophosphorylation	7	182	4.004	0.00806303	0.0742719
GO:0006811	ion transport	14	593	2.45777	0.0083251	0.0764295
GO:0042493	response to drug	6	136	4.59282	0.00842793	0.0771156
GO:0006886	intracellular protein transport	9	290	3.23081	0.0086439	0.0780071
GO:0034341	response to interferon-gamma	3	27	11.5671	0.00869588	0.0780071
GO:0035924	cellular response to vascular endothelial growth factor stimulus	3	27	11.5671	0.00869588	0.0780071
GO:0045671	negative regulation of osteoclast differentiation	3	27	11.5671	0.00869588	0.0780071
GO:0046329	negative regulation of JNK cascade	3	27	11.5671	0.00869588	0.0780071
GO:0050770	regulation of axonogenesis	3	27	11.5671	0.00869588	0.0780071
GO:0008286	insulin receptor signaling pathway	4	57	7.30554	0.00891306	0.0794362
GO:0071407	cellular response to organic cyclic compound	4	57	7.30554	0.00891306	0.0794362
GO:0001764	neuron migration	6	138	4.52626	0.00906821	0.0805574
GO:0006606	protein import into nucleus	5	95	5.47916	0.00917989	0.0812865
GO:0000186	activation of MAPKK activity	3	28	11.154	0.00967032	0.0823616
GO:0006693	prostaglandin metabolic process	3	28	11.154	0.00967032	0.0823616
GO:0030099	myeloid cell differentiation	3	28	11.154	0.00967032	0.0823616
GO:0014037	Schwann cell differentiation	2	8	26.026	0.00993139	0.0823616
GO:0014909	smooth muscle cell migration	2	8	26.026	0.00993139	0.0823616
GO:0016441	posttranscriptional gene silencing	2	8	26.026	0.00993139	0.0823616
GO:0031346	positive regulation of cell projection organization	2	8	26.026	0.00993139	0.0823616
GO:0032288	myelin assembly	2	8	26.026	0.00993139	0.0823616
GO:0034380	high-density lipoprotein particle assembly	2	8	26.026	0.00993139	0.0823616
GO:0038026	reelin-mediated signaling pathway	2	8	26.026	0.00993139	0.0823616
GO:0042541	hemoglobin biosynthetic process	2	8	26.026	0.00993139	0.0823616
GO:0051057	positive regulation of small GTPase mediated signal transduction	2	8	26.026	0.00993139	0.0823616
GO:0060158	phospholipase C-activating dopamine receptor signaling pathway	2	8	26.026	0.00993139	0.0823616
GO:0060396	growth hormone receptor signaling pathway	2	8	26.026	0.00993139	0.0823616
GO:0060430	lung saccule development	2	8	26.026	0.00993139	0.0823616
GO:0070212	protein poly-ADP-ribosylation	2	8	26.026	0.00993139	0.0823616
GO:0071985	multivesicular body sorting pathway	2	8	26.026	0.00993139	0.0823616
GO:0099641	anterograde axonal protein transport	2	8	26.026	0.00993139	0.0823616
GO:1901522	positive regulation of transcription from RNA polymerase II promoter involved in cellular response to chemical stimulus	2	8	26.026	0.00993139	0.0823616
GO:1902966	positive regulation of protein localization to early endosome	2	8	26.026	0.00993139	0.0823616
GO:1990845	adaptive thermogenesis	2	8	26.026	0.00993139	0.0823616
GO:0000045	autophagosome assembly	4	59	7.0579	0.0101159	0.0836388
GO:0045332	phospholipid translocation	3	29	10.7694	0.0107097	0.0874942
GO:0045921	positive regulation of exocytosis	3	29	10.7694	0.0107097	0.0874942
GO:0051384	response to glucocorticoid	3	29	10.7694	0.0107097	0.0874942
GO:1900273	positive regulation of long-term synaptic potentiation	3	29	10.7694	0.0107097	0.0874942
GO:0070936	protein K48-linked ubiquitination	4	60	6.94027	0.0107571	0.0876209
GO:0008217	regulation of blood pressure	4	61	6.82649	0.0114256	0.0922125
GO:0010033	response to organic substance	4	61	6.82649	0.0114256	0.0922125
GO:0048856	anatomical structure development	4	61	6.82649	0.0114256	0.0922125
GO:0010629	negative regulation of gene expression	10	361	2.88377	0.0114552	0.0922125
GO:0003148	outflow tract septum morphogenesis	3	30	10.4104	0.0118153	0.0937373
GO:0006493	protein O-linked glycosylation	3	30	10.4104	0.0118153	0.0937373
GO:0016032	viral process	3	30	10.4104	0.0118153	0.0937373
GO:0031641	regulation of myelination	3	30	10.4104	0.0118153	0.0937373
GO:0048738	cardiac muscle tissue development	3	30	10.4104	0.0118153	0.0937373
GO:0030326	embryonic limb morphogenesis	4	62	6.71639	0.012122	0.095893
GO:0001933	negative regulation of protein phosphorylation	5	102	5.10314	0.0124948	0.0978314
GO:0001553	luteinization	2	9	23.1342	0.0126878	0.0978314
GO:0007215	glutamate receptor signaling pathway	2	9	23.1342	0.0126878	0.0978314
GO:0010888	negative regulation of lipid storage	2	9	23.1342	0.0126878	0.0978314
GO:0016233	telomere capping	2	9	23.1342	0.0126878	0.0978314
GO:0017121	phospholipid scrambling	2	9	23.1342	0.0126878	0.0978314
GO:0042063	gliogenesis	2	9	23.1342	0.0126878	0.0978314
GO:0061032	visceral serous pericardium development	2	9	23.1342	0.0126878	0.0978314
GO:2000320	negative regulation of T-helper 17 cell differentiation	2	9	23.1342	0.0126878	0.0978314
GO:0006396	RNA processing	4	63	6.60978	0.0128468	0.0984912
GO:0045860	positive regulation of protein kinase activity	4	63	6.60978	0.0128468	0.0984912
GO:0042771	intrinsic apoptotic signaling pathway in response to DNA damage by p53 class mediator	3	31	10.0746	0.0129886	0.0984912
GO:0045807	positive regulation of endocytosis	3	31	10.0746	0.0129886	0.0984912
GO:0045879	negative regulation of smoothened signaling pathway	3	31	10.0746	0.0129886	0.0984912
GO:0060828	regulation of canonical Wnt signaling pathway	3	31	10.0746	0.0129886	0.0984912
GO:0006888	ER to Golgi vesicle-mediated transport	5	104	5.005	0.0135821	0.102708
GO:0007613	memory	5	105	4.95733	0.0141505	0.105864
GO:0006506	GPI anchor biosynthetic process	3	32	9.75975	0.0142309	0.105864
GO:0007595	lactation	3	32	9.75975	0.0142309	0.105864
GO:0012501	programmed cell death	3	32	9.75975	0.0142309	0.105864
GO:0031016	pancreas development	3	32	9.75975	0.0142309	0.105864
GO:0045089	positive regulation of innate immune response	3	32	9.75975	0.0142309	0.105864
GO:0017157	regulation of exocytosis	3	33	9.464	0.0155432	0.113242
GO:0030168	platelet activation	3	33	9.464	0.0155432	0.113242
GO:0051973	positive regulation of telomerase activity	3	33	9.464	0.0155432	0.113242
GO:2001240	negative regulation of extrinsic apoptotic signaling pathway in absence of ligand	3	33	9.464	0.0155432	0.113242
GO:0006646	phosphatidylethanolamine biosynthetic process	2	10	20.8208	0.015759	0.113242
GO:0006707	cholesterol catabolic process	2	10	20.8208	0.015759	0.113242
GO:0019732	antifungal humoral response	2	10	20.8208	0.015759	0.113242
GO:0031123	RNA 3'-end processing	2	10	20.8208	0.015759	0.113242
GO:0071223	cellular response to lipoteichoic acid	2	10	20.8208	0.015759	0.113242
GO:0090129	positive regulation of synapse maturation	2	10	20.8208	0.015759	0.113242
GO:0140115	export across plasma membrane	2	10	20.8208	0.015759	0.113242
GO:1900747	negative regulation of vascular endothelial growth factor signaling pathway	2	10	20.8208	0.015759	0.113242
GO:1902018	negative regulation of cilium assembly	2	10	20.8208	0.015759	0.113242
GO:0006006	glucose metabolic process	4	68	6.12376	0.016916	0.119445
GO:0030512	negative regulation of transforming growth factor beta receptor signaling pathway	4	68	6.12376	0.016916	0.119445
GO:0033674	positive regulation of kinase activity	4	68	6.12376	0.016916	0.119445
GO:0048146	positive regulation of fibroblast proliferation	4	68	6.12376	0.016916	0.119445
GO:0043388	positive regulation of DNA binding	3	34	9.18565	0.0169269	0.119445
GO:0048709	oligodendrocyte differentiation	3	34	9.18565	0.0169269	0.119445
GO:0071773	cellular response to BMP stimulus	3	34	9.18565	0.0169269	0.119445
GO:0009887	animal organ morphogenesis	6	158	3.95332	0.0176579	0.124284
GO:0042552	myelination	4	69	6.03501	0.0178227	0.125123
GO:0000079	regulation of cyclin-dependent protein serine/threonine kinase activity	3	35	8.9232	0.0183829	0.128074
GO:0014065	phosphatidylinositol 3-kinase signaling	3	35	8.9232	0.0183829	0.128074
GO:0019228	neuronal action potential	3	35	8.9232	0.0183829	0.128074
GO:0008344	adult locomotory behavior	4	70	5.9488	0.0187615	0.129399
GO:0018108	peptidyl-tyrosine phosphorylation	4	70	5.9488	0.0187615	0.129399
GO:0001893	maternal placenta development	2	11	18.928	0.0191388	0.129399
GO:0032060	bleb assembly	2	11	18.928	0.0191388	0.129399
GO:0033327	Leydig cell differentiation	2	11	18.928	0.0191388	0.129399
GO:0033993	response to lipid	2	11	18.928	0.0191388	0.129399
GO:0035987	endodermal cell differentiation	2	11	18.928	0.0191388	0.129399
GO:0046598	positive regulation of viral entry into host cell	2	11	18.928	0.0191388	0.129399
GO:0051901	positive regulation of mitochondrial depolarization	2	11	18.928	0.0191388	0.129399
GO:0070213	protein auto-ADP-ribosylation	2	11	18.928	0.0191388	0.129399
GO:0098693	regulation of synaptic vesicle cycle	2	11	18.928	0.0191388	0.129399
GO:2000009	negative regulation of protein localization to cell surface	2	11	18.928	0.0191388	0.129399
GO:0006469	negative regulation of protein kinase activity	4	71	5.86501	0.0197329	0.132437
GO:0010508	positive regulation of autophagy	4	71	5.86501	0.0197329	0.132437
GO:0042147	retrograde transport, endosome to Golgi	4	71	5.86501	0.0197329	0.132437
GO:0006513	protein monoubiquitination	3	36	8.67533	0.0199125	0.132992
GO:1904707	positive regulation of vascular smooth muscle cell proliferation	3	36	8.67533	0.0199125	0.132992
GO:0006633	fatty acid biosynthetic process	4	72	5.78355	0.0207375	0.137832
GO:0042472	inner ear morphogenesis	4	72	5.78355	0.0207375	0.137832
GO:0050731	positive regulation of peptidyl-tyrosine phosphorylation	5	115	4.52626	0.0208076	0.137963
GO:0008219	cell death	3	37	8.44086	0.0215165	0.141089
GO:0048008	platelet-derived growth factor receptor signaling pathway	3	37	8.44086	0.0215165	0.141089
GO:0048662	negative regulation of smooth muscle cell proliferation	3	37	8.44086	0.0215165	0.141089
GO:0060349	bone morphogenesis	3	37	8.44086	0.0215165	0.141089
GO:0001501	skeletal system development	5	116	4.48724	0.0215766	0.141089
GO:0030433	ubiquitin-dependent ERAD pathway	4	73	5.70433	0.0217758	0.141089
GO:0001913	T cell mediated cytotoxicity	2	12	17.3507	0.022821	0.141089
GO:0003094	glomerular filtration	2	12	17.3507	0.022821	0.141089
GO:0006091	generation of precursor metabolites and energy	2	12	17.3507	0.022821	0.141089
GO:0007252	I-kappaB phosphorylation	2	12	17.3507	0.022821	0.141089
GO:0010586	miRNA metabolic process	2	12	17.3507	0.022821	0.141089
GO:0014824	artery smooth muscle contraction	2	12	17.3507	0.022821	0.141089
GO:0021955	central nervous system neuron axonogenesis	2	12	17.3507	0.022821	0.141089
GO:0031953	negative regulation of protein autophosphorylation	2	12	17.3507	0.022821	0.141089
GO:0032308	positive regulation of prostaglandin secretion	2	12	17.3507	0.022821	0.141089
GO:0034375	high-density lipoprotein particle remodeling	2	12	17.3507	0.022821	0.141089
GO:0035455	response to interferon-alpha	2	12	17.3507	0.022821	0.141089
GO:0035457	cellular response to interferon-alpha	2	12	17.3507	0.022821	0.141089
GO:0042753	positive regulation of circadian rhythm	2	12	17.3507	0.022821	0.141089
GO:0045953	negative regulation of natural killer cell mediated cytotoxicity	2	12	17.3507	0.022821	0.141089
GO:0048009	insulin-like growth factor receptor signaling pathway	2	12	17.3507	0.022821	0.141089
GO:0050927	positive regulation of positive chemotaxis	2	12	17.3507	0.022821	0.141089
GO:0051246	regulation of protein metabolic process	2	12	17.3507	0.022821	0.141089
GO:0051974	negative regulation of telomerase activity	2	12	17.3507	0.022821	0.141089
GO:0060740	prostate gland epithelium morphogenesis	2	12	17.3507	0.022821	0.141089
GO:0061099	negative regulation of protein tyrosine kinase activity	2	12	17.3507	0.022821	0.141089
GO:0070233	negative regulation of T cell apoptotic process	2	12	17.3507	0.022821	0.141089
GO:0071786	endoplasmic reticulum tubular network organization	2	12	17.3507	0.022821	0.141089
GO:1900272	negative regulation of long-term synaptic potentiation	2	12	17.3507	0.022821	0.141089
GO:2000343	positive regulation of chemokine (C-X-C motif) ligand 2 production	2	12	17.3507	0.022821	0.141089
GO:0030324	lung development	5	118	4.41119	0.0231744	0.141495
GO:0006906	vesicle fusion	3	38	8.21874	0.0231959	0.141495
GO:0048468	cell development	3	38	8.21874	0.0231959	0.141495
GO:0048872	homeostasis of number of cells	3	38	8.21874	0.0231959	0.141495
GO:0055072	iron ion homeostasis	3	38	8.21874	0.0231959	0.141495
GO:0072593	reactive oxygen species metabolic process	3	38	8.21874	0.0231959	0.141495
GO:0032088	negative regulation of NF-kappaB transcription factor activity	4	75	5.55221	0.0239552	0.14548
GO:0050680	negative regulation of epithelial cell proliferation	4	75	5.55221	0.0239552	0.14548
GO:0006260	DNA replication	5	120	4.33767	0.0248537	0.149874
GO:0006289	nucleotide-excision repair	3	39	8.008	0.0249517	0.149874
GO:0007029	endoplasmic reticulum organization	3	39	8.008	0.0249517	0.149874
GO:0030513	positive regulation of BMP signaling pathway	3	39	8.008	0.0249517	0.149874
GO:0042177	negative regulation of protein catabolic process	3	39	8.008	0.0249517	0.149874
GO:0007596	blood coagulation	4	76	5.47916	0.0250974	0.15042
GO:0007267	cell-cell signaling	4	77	5.408	0.0262751	0.153973
GO:0032259	methylation	6	172	3.63153	0.0264976	0.153973
GO:0006397	mRNA processing	9	345	2.71576	0.026641	0.153973
GO:0001656	metanephros development	3	40	7.8078	0.0267847	0.153973
GO:0032735	positive regulation of interleukin-12 production	3	40	7.8078	0.0267847	0.153973
GO:0050873	brown fat cell differentiation	3	40	7.8078	0.0267847	0.153973
GO:0001952	regulation of cell-matrix adhesion	2	13	16.016	0.0267994	0.153973
GO:0002430	complement receptor mediated signaling pathway	2	13	16.016	0.0267994	0.153973
GO:0006825	copper ion transport	2	13	16.016	0.0267994	0.153973
GO:0007530	sex determination	2	13	16.016	0.0267994	0.153973
GO:0015909	long-chain fatty acid transport	2	13	16.016	0.0267994	0.153973
GO:0016331	morphogenesis of embryonic epithelium	2	13	16.016	0.0267994	0.153973
GO:0030948	negative regulation of vascular endothelial growth factor receptor signaling pathway	2	13	16.016	0.0267994	0.153973
GO:0034374	low-density lipoprotein particle remodeling	2	13	16.016	0.0267994	0.153973
GO:0045116	protein neddylation	2	13	16.016	0.0267994	0.153973
GO:0050863	regulation of T cell activation	2	13	16.016	0.0267994	0.153973
GO:0061744	motor behavior	2	13	16.016	0.0267994	0.153973
GO:0071901	negative regulation of protein serine/threonine kinase activity	2	13	16.016	0.0267994	0.153973
GO:0009888	tissue development	3	41	7.61737	0.0286957	0.153973
GO:0035023	regulation of Rho protein signal transduction	4	79	5.27109	0.0287391	0.153973
GO:0043010	camera-type eye development	4	79	5.27109	0.0287391	0.153973
GO:0045665	negative regulation of neuron differentiation	4	79	5.27109	0.0287391	0.153973
GO:0060041	retina development in camera-type eye	4	79	5.27109	0.0287391	0.153973
GO:0030182	neuron differentiation	6	175	3.56928	0.028746	0.153973
GO:0048661	positive regulation of smooth muscle cell proliferation	4	80	5.2052	0.0300262	0.153973
GO:0006605	protein targeting	3	42	7.436	0.0306854	0.153973
GO:0009306	protein secretion	3	42	7.436	0.0306854	0.153973
GO:0034504	protein localization to nucleus	3	42	7.436	0.0306854	0.153973
GO:0021819	layer formation in cerebral cortex	2	14	14.872	0.031068	0.153973
GO:0031076	embryonic camera-type eye development	2	14	14.872	0.031068	0.153973
GO:0031629	synaptic vesicle fusion to presynaptic active zone membrane	2	14	14.872	0.031068	0.153973
GO:0042532	negative regulation of tyrosine phosphorylation of STAT protein	2	14	14.872	0.031068	0.153973
GO:0042987	amyloid precursor protein catabolic process	2	14	14.872	0.031068	0.153973
GO:0060339	negative regulation of type I interferon-mediated signaling pathway	2	14	14.872	0.031068	0.153973
GO:0071404	cellular response to low-density lipoprotein particle stimulus	2	14	14.872	0.031068	0.153973
GO:1900025	negative regulation of substrate adhesion-dependent cell spreading	2	14	14.872	0.031068	0.153973
GO:0030336	negative regulation of cell migration	5	128	4.06656	0.0324281	0.153973
GO:0007050	cell cycle arrest	4	82	5.07824	0.032713	0.153973
GO:0030183	B cell differentiation	4	82	5.07824	0.032713	0.153973
GO:0006890	retrograde vesicle-mediated transport, Golgi to ER	3	43	7.26307	0.0327547	0.153973
GO:0033077	T cell differentiation in thymus	3	43	7.26307	0.0327547	0.153973
GO:0046854	phosphatidylinositol phosphorylation	3	43	7.26307	0.0327547	0.153973
GO:0006644	phospholipid metabolic process	3	44	7.098	0.0349041	0.153973
GO:0030855	epithelial cell differentiation	3	44	7.098	0.0349041	0.153973
GO:0046034	ATP metabolic process	3	44	7.098	0.0349041	0.153973
GO:0046326	positive regulation of glucose import	3	44	7.098	0.0349041	0.153973
GO:0070534	protein K63-linked ubiquitination	3	44	7.098	0.0349041	0.153973
GO:0002755	MyD88-dependent toll-like receptor signaling pathway	2	15	13.8805	0.035621	0.153973
GO:0009314	response to radiation	2	15	13.8805	0.035621	0.153973
GO:0015693	magnesium ion transport	2	15	13.8805	0.035621	0.153973
GO:0016322	neuron remodeling	2	15	13.8805	0.035621	0.153973
GO:0032680	regulation of tumor necrosis factor production	2	15	13.8805	0.035621	0.153973
GO:0033690	positive regulation of osteoblast proliferation	2	15	13.8805	0.035621	0.153973
GO:0035563	positive regulation of chromatin binding	2	15	13.8805	0.035621	0.153973
GO:0042026	protein refolding	2	15	13.8805	0.035621	0.153973
GO:0044257	cellular protein catabolic process	2	15	13.8805	0.035621	0.153973
GO:0045580	regulation of T cell differentiation	2	15	13.8805	0.035621	0.153973
GO:0061051	positive regulation of cell growth involved in cardiac muscle cell development	2	15	13.8805	0.035621	0.153973
GO:0071711	basement membrane organization	2	15	13.8805	0.035621	0.153973
GO:1903428	positive regulation of reactive oxygen species biosynthetic process	2	15	13.8805	0.035621	0.153973
GO:2000178	negative regulation of neural precursor cell proliferation	2	15	13.8805	0.035621	0.153973
GO:0043410	positive regulation of MAPK cascade	5	131	3.97343	0.0356401	0.153973
GO:0030890	positive regulation of B cell proliferation	3	45	6.94027	0.0371343	0.153973
GO:0032722	positive regulation of chemokine production	3	45	6.94027	0.0371343	0.153973
GO:0048015	phosphatidylinositol-mediated signaling	3	45	6.94027	0.0371343	0.153973
GO:0000032	cell wall mannoprotein biosynthetic process	1	1	104.104	0.0384231	0.153973
GO:0000085	mitotic G2 phase	1	1	104.104	0.0384231	0.153973
GO:0000963	mitochondrial RNA processing	1	1	104.104	0.0384231	0.153973
GO:0001572	lactosylceramide biosynthetic process	1	1	104.104	0.0384231	0.153973
GO:0002300	CD8-positive, alpha-beta intraepithelial T cell differentiation	1	1	104.104	0.0384231	0.153973
GO:0002319	memory B cell differentiation	1	1	104.104	0.0384231	0.153973
GO:0002383	immune response in brain or nervous system	1	1	104.104	0.0384231	0.153973
GO:0003061	positive regulation of the force of heart contraction by norepinephrine	1	1	104.104	0.0384231	0.153973
GO:0003117	regulation of vasoconstriction by circulating norepinephrine	1	1	104.104	0.0384231	0.153973
GO:0007618	mating	1	1	104.104	0.0384231	0.153973
GO:0008653	lipopolysaccharide metabolic process	1	1	104.104	0.0384231	0.153973
GO:0009104	lipopolysaccharide catabolic process	1	1	104.104	0.0384231	0.153973
GO:0009635	response to herbicide	1	1	104.104	0.0384231	0.153973
GO:0009855	determination of bilateral symmetry	1	1	104.104	0.0384231	0.153973
GO:0010286	heat acclimation	1	1	104.104	0.0384231	0.153973
GO:0010624	regulation of Schwann cell proliferation	1	1	104.104	0.0384231	0.153973
GO:0010877	lipid transport involved in lipid storage	1	1	104.104	0.0384231	0.153973
GO:0010878	cholesterol storage	1	1	104.104	0.0384231	0.153973
GO:0014866	skeletal myofibril assembly	1	1	104.104	0.0384231	0.153973
GO:0014896	muscle hypertrophy	1	1	104.104	0.0384231	0.153973
GO:0015790	UDP-xylose transmembrane transport	1	1	104.104	0.0384231	0.153973
GO:0015794	glycerol-3-phosphate transmembrane transport	1	1	104.104	0.0384231	0.153973
GO:0015865	purine nucleotide transport	1	1	104.104	0.0384231	0.153973
GO:0019285	glycine betaine biosynthetic process from choline	1	1	104.104	0.0384231	0.153973
GO:0019318	hexose metabolic process	1	1	104.104	0.0384231	0.153973
GO:0021512	spinal cord anterior/posterior patterning	1	1	104.104	0.0384231	0.153973
GO:0021541	ammon gyrus development	1	1	104.104	0.0384231	0.153973
GO:0021572	rhombomere 6 development	1	1	104.104	0.0384231	0.153973
GO:0021590	cerebellum maturation	1	1	104.104	0.0384231	0.153973
GO:0021618	hypoglossal nerve morphogenesis	1	1	104.104	0.0384231	0.153973
GO:0021679	cerebellar molecular layer development	1	1	104.104	0.0384231	0.153973
GO:0021683	cerebellar granular layer morphogenesis	1	1	104.104	0.0384231	0.153973
GO:0021688	cerebellar molecular layer formation	1	1	104.104	0.0384231	0.153973
GO:0021814	cell motility involved in cerebral cortex radial glia guided migration	1	1	104.104	0.0384231	0.153973
GO:0023061	signal release	1	1	104.104	0.0384231	0.153973
GO:0031335	regulation of sulfur amino acid metabolic process	1	1	104.104	0.0384231	0.153973
GO:0032196	transposition	1	1	104.104	0.0384231	0.153973
GO:0032353	negative regulation of hormone biosynthetic process	1	1	104.104	0.0384231	0.153973
GO:0032658	regulation of interleukin-15 production	1	1	104.104	0.0384231	0.153973
GO:0032738	positive regulation of interleukin-15 production	1	1	104.104	0.0384231	0.153973
GO:0033036	macromolecule localization	1	1	104.104	0.0384231	0.153973
GO:0033037	polysaccharide localization	1	1	104.104	0.0384231	0.153973
GO:0033045	regulation of sister chromatid segregation	1	1	104.104	0.0384231	0.153973
GO:0033668	negative regulation by symbiont of host apoptotic process	1	1	104.104	0.0384231	0.153973
GO:0034158	toll-like receptor 8 signaling pathway	1	1	104.104	0.0384231	0.153973
GO:0034178	toll-like receptor 13 signaling pathway	1	1	104.104	0.0384231	0.153973
GO:0034346	positive regulation of type III interferon production	1	1	104.104	0.0384231	0.153973
GO:0034350	regulation of glial cell apoptotic process	1	1	104.104	0.0384231	0.153973
GO:0034616	response to laminar fluid shear stress	1	1	104.104	0.0384231	0.153973
GO:0035476	angioblast cell migration	1	1	104.104	0.0384231	0.153973
GO:0035644	phosphoanandamide dephosphorylation	1	1	104.104	0.0384231	0.153973
GO:0035665	TIRAP-dependent toll-like receptor 4 signaling pathway	1	1	104.104	0.0384231	0.153973
GO:0035772	interleukin-13-mediated signaling pathway	1	1	104.104	0.0384231	0.153973
GO:0035780	CD80 biosynthetic process	1	1	104.104	0.0384231	0.153973
GO:0035790	platelet-derived growth factor receptor-alpha signaling pathway	1	1	104.104	0.0384231	0.153973
GO:0036071	N-glycan fucosylation	1	1	104.104	0.0384231	0.153973
GO:0036085	GDP-fucose import into Golgi lumen	1	1	104.104	0.0384231	0.153973
GO:0036116	long-chain fatty-acyl-CoA catabolic process	1	1	104.104	0.0384231	0.153973
GO:0036135	Schwann cell migration	1	1	104.104	0.0384231	0.153973
GO:0036257	multivesicular body organization	1	1	104.104	0.0384231	0.153973
GO:0038020	insulin receptor recycling	1	1	104.104	0.0384231	0.153973
GO:0038184	cell surface bile acid receptor signaling pathway	1	1	104.104	0.0384231	0.153973
GO:0039530	MDA-5 signaling pathway	1	1	104.104	0.0384231	0.153973
GO:0042182	ketone catabolic process	1	1	104.104	0.0384231	0.153973
GO:0042938	dipeptide transport	1	1	104.104	0.0384231	0.153973
GO:0043004	cytoplasmic sequestering of CFTR protein	1	1	104.104	0.0384231	0.153973
GO:0043112	receptor metabolic process	1	1	104.104	0.0384231	0.153973
GO:0043132	NAD transport	1	1	104.104	0.0384231	0.153973
GO:0043376	regulation of CD8-positive, alpha-beta T cell differentiation	1	1	104.104	0.0384231	0.153973
GO:0044788	modulation by host of viral process	1	1	104.104	0.0384231	0.153973
GO:0045002	double-strand break repair via single-strand annealing	1	1	104.104	0.0384231	0.153973
GO:0045829	negative regulation of isotype switching	1	1	104.104	0.0384231	0.153973
GO:0045919	positive regulation of cytolysis	1	1	104.104	0.0384231	0.153973
GO:0046368	GDP-L-fucose metabolic process	1	1	104.104	0.0384231	0.153973
GO:0046745	viral capsid secondary envelopment	1	1	104.104	0.0384231	0.153973
GO:0046880	regulation of follicle-stimulating hormone secretion	1	1	104.104	0.0384231	0.153973
GO:0048209	regulation of vesicle targeting, to, from or within Golgi	1	1	104.104	0.0384231	0.153973
GO:0048631	regulation of skeletal muscle tissue growth	1	1	104.104	0.0384231	0.153973
GO:0050685	positive regulation of mRNA processing	1	1	104.104	0.0384231	0.153973
GO:0051141	negative regulation of NK T cell proliferation	1	1	104.104	0.0384231	0.153973
GO:0051319	G2 phase	1	1	104.104	0.0384231	0.153973
GO:0051418	microtubule nucleation by microtubule organizing center	1	1	104.104	0.0384231	0.153973
GO:0051651	maintenance of location in cell	1	1	104.104	0.0384231	0.153973
GO:0060283	negative regulation of oocyte development	1	1	104.104	0.0384231	0.153973
GO:0060383	positive regulation of DNA strand elongation	1	1	104.104	0.0384231	0.153973
GO:0060755	negative regulation of mast cell chemotaxis	1	1	104.104	0.0384231	0.153973
GO:0060945	cardiac neuron differentiation	1	1	104.104	0.0384231	0.153973
GO:0061108	seminal vesicle epithelium development	1	1	104.104	0.0384231	0.153973
GO:0061110	dense core granule biogenesis	1	1	104.104	0.0384231	0.153973
GO:0061343	cell adhesion involved in heart morphogenesis	1	1	104.104	0.0384231	0.153973
GO:0061611	mannose to fructose-6-phosphate metabolic process	1	1	104.104	0.0384231	0.153973
GO:0061619	glycolytic process from mannose through fructose-6-phosphate	1	1	104.104	0.0384231	0.153973
GO:0061715	miRNA 2'-O-methylation	1	1	104.104	0.0384231	0.153973
GO:0061741	chaperone-mediated protein transport involved in chaperone-mediated autophagy	1	1	104.104	0.0384231	0.153973
GO:0070127	tRNA aminoacylation for mitochondrial protein translation	1	1	104.104	0.0384231	0.153973
GO:0070230	positive regulation of lymphocyte apoptotic process	1	1	104.104	0.0384231	0.153973
GO:0070661	leukocyte proliferation	1	1	104.104	0.0384231	0.153973
GO:0070963	positive regulation of neutrophil mediated killing of gram-negative bacterium	1	1	104.104	0.0384231	0.153973
GO:0071336	regulation of hair follicle cell proliferation	1	1	104.104	0.0384231	0.153973
GO:0071357	cellular response to type I interferon	1	1	104.104	0.0384231	0.153973
GO:0071660	positive regulation of IP-10 production	1	1	104.104	0.0384231	0.153973
GO:0071806	protein transmembrane transport	1	1	104.104	0.0384231	0.153973
GO:0071830	triglyceride-rich lipoprotein particle clearance	1	1	104.104	0.0384231	0.153973
GO:0071831	intermediate-density lipoprotein particle clearance	1	1	104.104	0.0384231	0.153973
GO:0072195	kidney smooth muscle cell differentiation	1	1	104.104	0.0384231	0.153973
GO:0072394	detection of stimulus involved in cell cycle checkpoint	1	1	104.104	0.0384231	0.153973
GO:0072421	detection of DNA damage stimulus involved in DNA damage checkpoint	1	1	104.104	0.0384231	0.153973
GO:0072428	signal transduction involved in intra-S DNA damage checkpoint	1	1	104.104	0.0384231	0.153973
GO:0072677	eosinophil migration	1	1	104.104	0.0384231	0.153973
GO:0090085	regulation of protein deubiquitination	1	1	104.104	0.0384231	0.153973
GO:0090242	retinoic acid receptor signaling pathway involved in somitogenesis	1	1	104.104	0.0384231	0.153973
GO:0090278	negative regulation of peptide hormone secretion	1	1	104.104	0.0384231	0.153973
GO:0097102	endothelial tip cell fate specification	1	1	104.104	0.0384231	0.153973
GO:0097281	immune complex formation	1	1	104.104	0.0384231	0.153973
GO:0097502	mannosylation	1	1	104.104	0.0384231	0.153973
GO:0097577	sequestering of iron ion	1	1	104.104	0.0384231	0.153973
GO:0098038	non-replicative transposition, DNA-mediated	1	1	104.104	0.0384231	0.153973
GO:0098529	neuromuscular junction development, skeletal muscle fiber	1	1	104.104	0.0384231	0.153973
GO:0106089	negative regulation of cell adhesion involved in sprouting angiogenesis	1	1	104.104	0.0384231	0.153973
GO:0150019	basal dendrite morphogenesis	1	1	104.104	0.0384231	0.153973
GO:1900225	regulation of NLRP3 inflammasome complex assembly	1	1	104.104	0.0384231	0.153973
GO:1900535	palmitic acid biosynthetic process	1	1	104.104	0.0384231	0.153973
GO:1900731	positive regulation of adenylate cyclase-inhibiting opioid receptor signaling pathway	1	1	104.104	0.0384231	0.153973
GO:1901340	negative regulation of store-operated calcium channel activity	1	1	104.104	0.0384231	0.153973
GO:1901389	negative regulation of transforming growth factor beta activation	1	1	104.104	0.0384231	0.153973
GO:1901390	positive regulation of transforming growth factor beta activation	1	1	104.104	0.0384231	0.153973
GO:1901627	negative regulation of postsynaptic membrane organization	1	1	104.104	0.0384231	0.153973
GO:1901724	positive regulation of cell proliferation involved in kidney development	1	1	104.104	0.0384231	0.153973
GO:1902311	regulation of copper ion transmembrane transport	1	1	104.104	0.0384231	0.153973
GO:1902771	positive regulation of choline O-acetyltransferase activity	1	1	104.104	0.0384231	0.153973
GO:1902904	negative regulation of supramolecular fiber organization	1	1	104.104	0.0384231	0.153973
GO:1902955	positive regulation of early endosome to recycling endosome transport	1	1	104.104	0.0384231	0.153973
GO:1902997	negative regulation of neurofibrillary tangle assembly	1	1	104.104	0.0384231	0.153973
GO:1902999	negative regulation of phospholipid efflux	1	1	104.104	0.0384231	0.153973
GO:1903001	negative regulation of lipid transport across blood brain barrier	1	1	104.104	0.0384231	0.153973
GO:1903002	positive regulation of lipid transport across blood brain barrier	1	1	104.104	0.0384231	0.153973
GO:1903400	L-arginine transmembrane transport	1	1	104.104	0.0384231	0.153973
GO:1903401	L-lysine transmembrane transport	1	1	104.104	0.0384231	0.153973
GO:1903431	positive regulation of cell maturation	1	1	104.104	0.0384231	0.153973
GO:1903435	positive regulation of constitutive secretory pathway	1	1	104.104	0.0384231	0.153973
GO:1903487	regulation of lactation	1	1	104.104	0.0384231	0.153973
GO:1904003	negative regulation of sebum secreting cell proliferation	1	1	104.104	0.0384231	0.153973
GO:1904075	positive regulation of trophectodermal cell proliferation	1	1	104.104	0.0384231	0.153973
GO:1904407	positive regulation of nitric oxide metabolic process	1	1	104.104	0.0384231	0.153973
GO:1904592	positive regulation of protein refolding	1	1	104.104	0.0384231	0.153973
GO:1904764	chaperone-mediated autophagy translocation complex disassembly	1	1	104.104	0.0384231	0.153973
GO:1905553	regulation of blood vessel branching	1	1	104.104	0.0384231	0.153973
GO:1905584	outer hair cell apoptotic process	1	1	104.104	0.0384231	0.153973
GO:1905662	negative regulation of telomerase RNA reverse transcriptase activity	1	1	104.104	0.0384231	0.153973
GO:1905774	regulation of DNA helicase activity	1	1	104.104	0.0384231	0.153973
GO:1905828	regulation of prostaglandin catabolic process	1	1	104.104	0.0384231	0.153973
GO:1905855	positive regulation of heparan sulfate binding	1	1	104.104	0.0384231	0.153973
[truncated: 2,070 more rows]

## Sheet: 显著性功能所包含下调基因
go_id	go_name	enrichment	pvalue	FDR	gene_id	gene_name
[truncated: 5,697 more rows]
