# Supplementary material for: The Effect of Immunosuppressive Adjuvant Kynurenine on Type 1 Diabetes Vaccine
Source: Front Immunol. 2021 Jul 7;12:681328. doi: 10.3389/fimmu.2021.681328 (PMC8293994; doi:10.3389/fimmu.2021.681328)
Supplement: Supplementary Table 5 — KEGG pathway analysis for the target gene of differentially expressed miRNA. [file Table_5.xls]

## Sheet: 上调基因显著性Pathway
path_id	path_name	path_diffgene_count	path_gene_count	enrichment	pvalue	FDR
03010	Ribosome	57	179	34.0726	7.75328e-70	2.14766e-67
05171	Coronavirus disease - COVID-19?New!	55	247	23.8259	9.62616e-58	1.33322e-55
01100	Metabolic pathways	67	1572	4.56043	4.67586e-24	4.31738e-22
05022	Pathways of neurodegeneration - multiple diseases?New!	37	472	8.38771	4.16047e-22	2.88113e-20
05020	Prion disease	27	268	10.7799	4.05864e-19	2.24849e-17
05012	Parkinson disease	26	247	11.2632	6.42957e-19	2.96832e-17
05014	Amyotrophic lateral sclerosis	30	369	8.69919	1.673e-18	6.62029e-17
05016	Huntington disease	27	302	9.56623	8.88788e-18	3.07743e-16
05010	Alzheimer disease	29	369	8.40921	1.63322e-17	5.02669e-16
04932	Non-alcoholic fatty liver disease	20	151	14.1722	1.05129e-16	2.91208e-15
03040	Spliceosome	19	134	15.1716	1.78023e-16	4.48295e-15
00190	Oxidative phosphorylation	18	133	14.4812	2.77728e-15	6.41089e-14
04714	Thermogenesis	21	230	9.76957	3.48697e-14	7.42992e-13
04668	TNF signaling pathway	11	113	10.4159	4.30901e-08	8.52568e-07
04010	MAPK signaling pathway	16	294	5.82313	1.02164e-07	1.88663e-06
04064	NF-kappa B signaling pathway	10	105	10.1905	2.47715e-07	4.28857e-06
04723	Retrograde endocannabinoid signaling	11	148	7.9527	7.05334e-07	1.11729e-05
03013	RNA transport	12	182	7.05495	7.26034e-07	1.11729e-05
04625	C-type lectin receptor signaling pathway	9	112	8.59821	4.8231e-06	7.03158e-05
04657	IL-17 signaling pathway	8	91	9.40659	9.60738e-06	0.000133062
04380	Osteoclast differentiation	9	128	7.52344	1.46608e-05	0.000193383
04141	Protein processing in endoplasmic reticulum	10	172	6.22093	2.34923e-05	0.000290201
04210	Apoptosis	9	136	7.08088	2.40961e-05	0.000290201
05162	Measles	9	146	6.59589	4.2821e-05	0.000494226
04260	Cardiac muscle contraction	7	87	8.6092	7.39195e-05	0.000819028
05134	Legionellosis	6	61	10.5246	9.35752e-05	0.000996936
01212	Fatty acid metabolism	6	62	10.3548	0.000102786	0.00105451
05222	Small cell lung cancer	7	93	8.05376	0.000114197	0.00112973
05140	Leishmaniasis	6	70	9.17143	0.000205808	0.00196582
05202	Transcriptional misregulation in cancer	10	223	4.79821	0.000219612	0.00201769
03022	Basal transcription factors	5	44	12.1591	0.000225807	0.00201769
05200	Pathways in cancer	16	543	3.15285	0.0002704	0.00234065
05146	Amoebiasis	7	107	7	0.000280895	0.00235781
04928	Parathyroid hormone synthesis, secretion and action	7	108	6.93519	0.000297962	0.00240681
05418	Fluid shear stress and atherosclerosis	8	146	5.86301	0.00030411	0.00240681
04931	Insulin resistance	7	110	6.80909	0.000334638	0.00257485
05133	Pertussis	6	77	8.33766	0.000352173	0.00263654
01240	Biosynthesis of cofactors?New!	8	154	5.55844	0.000441183	0.00321599
04935	Growth hormone synthesis, secretion and action	7	116	6.4569	0.000467306	0.00331907
00280	Valine, leucine and isoleucine degradation	5	57	9.38596	0.000787826	0.00545569
04068	FoxO signaling pathway	7	131	5.71756	0.000991919	0.0067015
00230	Purine metabolism	7	136	5.50735	0.00124634	0.00813637
04623	Cytosolic DNA-sensing pathway	5	63	8.49206	0.00126305	0.00813637
04933	AGE-RAGE signaling pathway in diabetic complications	6	101	6.35644	0.00155873	0.00966075
04137	Mitophagy - animal	5	66	8.10606	0.00156944	0.00966075
03015	mRNA surveillance pathway	6	102	6.29412	0.00164321	0.00989497
05142	Chagas disease	6	103	6.23301	0.00173122	0.0102031
05224	Breast cancer	7	147	5.09524	0.00199122	0.011491
04920	Adipocytokine signaling pathway	5	71	7.53521	0.00220062	0.0124403
05218	Melanoma	5	72	7.43056	0.00234684	0.0127924
05166	Human T-cell leukemia virus 1 infection	9	247	3.89879	0.00235527	0.0127924
05132	Salmonella infection	9	253	3.80632	0.00279334	0.0147248
00061	Fatty acid biosynthesis	3	19	16.8947	0.00281738	0.0147248
04621	NOD-like receptor signaling pathway	8	211	4.05687	0.00363329	0.0186374
03050	Proteasome	4	47	9.10638	0.00392302	0.0197577
04930	Type II diabetes mellitus	4	48	8.91667	0.00424827	0.0210138
04979	Cholesterol metabolism	4	49	8.73469	0.00459198	0.0223154
03018	RNA degradation	5	84	6.36905	0.00472489	0.0225654
00600	Sphingolipid metabolism	4	50	8.56	0.0049547	0.0232619
04926	Relaxin signaling pathway	6	129	4.97674	0.00561941	0.025943
00071	Fatty acid degradation	4	52	8.23077	0.0057394	0.0259833
05210	Colorectal cancer	5	88	6.07955	0.00581576	0.0259833
05135	Yersinia infection	6	134	4.79104	0.00681994	0.0299861
04060	Cytokine-cytokine receptor interaction	9	293	3.28669	0.00770994	0.0333696
04120	Ubiquitin mediated proteolysis	6	145	4.42759	0.0101377	0.0428168
04620	Toll-like receptor signaling pathway	5	100	5.35	0.0102018	0.0428168
05226	Gastric cancer	6	150	4.28	0.0119931	0.0495832
00052	Galactose metabolism	3	32	10.0312	0.0131786	0.0536835
05145	Toxoplasmosis	5	110	4.86364	0.0153734	0.0617165
03410	Base excision repair	3	34	9.44118	0.0156813	0.0620531
05031	Amphetamine addiction	4	69	6.2029	0.0161806	0.0631271
05216	Thyroid cancer	3	37	8.67568	0.0199445	0.0767311
05167	Kaposi sarcoma-associated herpesvirus infection	7	225	3.32889	0.0222137	0.0832351
05212	Pancreatic cancer	4	76	5.63158	0.022817	0.0832351
05220	Chronic myeloid leukemia	4	76	5.63158	0.022817	0.0832351
03008	Ribosome biogenesis in eukaryotes	5	121	4.42149	0.0229767	0.0832351
05143	African trypanosomiasis	3	39	8.23077	0.0231376	0.0832351
05164	Influenza A	6	173	3.71098	0.0239394	0.0850157
04217	Necroptosis	6	174	3.68966	0.0246034	0.0862675
05169	Epstein-Barr virus infection	7	231	3.24242	0.0255376	0.088424
01230	Biosynthesis of amino acids	4	79	5.41772	0.0261434	0.0894039
04080	Neuroactive ligand-receptor interaction	9	358	2.68994	0.0282908	0.095207
04662	B cell receptor signaling pathway	4	81	5.28395	0.0285305	0.095207
05152	Tuberculosis	6	180	3.56667	0.0288714	0.095207
04962	Vasopressin-regulated water reabsorption	3	44	7.29545	0.0323969	0.105576
00730	Thiamine metabolism	2	15	14.2667	0.0337934	0.108846
05323	Rheumatoid arthritis	4	87	4.91954	0.0365414	0.116345
03320	PPAR signaling pathway	4	89	4.80899	0.0395052	0.124352
00983	Drug metabolism - other enzymes	4	92	4.65217	0.044236	0.137678
05168	Herpes simplex virus 1 infection	10	458	2.33624	0.0474866	0.146153
04061	Viral protein interaction with cytokine and cytokine receptor	4	95	4.50526	0.0493171	0.150119
04713	Circadian entrainment	4	98	4.36735	0.0547568	0.163093
05231	Choline metabolism in cancer	4	98	4.36735	0.0547568	0.163093
04925	Aldosterone synthesis and secretion	4	102	4.19608	0.0625815	0.184416
04660	T cell receptor signaling pathway	4	103	4.15534	0.0646416	0.188481
05144	Malaria	3	57	5.63158	0.0654795	0.188936
04922	Glucagon signaling pathway	4	104	4.11538	0.0667437	0.190598
00240	Pyrimidine metabolism	3	58	5.53448	0.0685817	0.19189
05213	Endometrial cancer	3	58	5.53448	0.0685817	0.19189
04310	Wnt signaling pathway	5	162	3.30247	0.0742137	0.205572
05161	Hepatitis B	5	163	3.28221	0.0759927	0.208415
00561	Glycerolipid metabolism	3	62	5.17742	0.0818002	0.217872
04213	Longevity regulating pathway - multiple species	3	62	5.17742	0.0818002	0.217872
05321	Inflammatory bowel disease	3	62	5.17742	0.0818002	0.217872
04977	Vitamin digestion and absorption	2	24	8.91667	0.084046	0.218799
04725	Cholinergic synapse	4	112	3.82143	0.0851019	0.218799
04913	Ovarian steroidogenesis	3	63	5.09524	0.0853077	0.218799
05217	Basal cell carcinoma	3	63	5.09524	0.0853077	0.218799
04630	JAK-STAT signaling pathway	5	169	3.16568	0.0872554	0.221741
04020	Calcium signaling pathway	6	240	2.675	0.104559	0.263299
00780	Biotin metabolism	1	3	35.6667	0.111106	0.277265
04110	Cell cycle	4	123	3.47967	0.114949	0.284293
01200	Carbon metabolism	4	124	3.45161	0.117932	0.284687
00062	Fatty acid elongation	2	29	7.37931	0.11991	0.284687
04115	p53 signaling pathway	3	72	4.45833	0.120528	0.284687
04927	Cortisol synthesis and secretion	3	72	4.45833	0.120528	0.284687
05223	Non-small cell lung cancer	3	72	4.45833	0.120528	0.284687
04740	Olfactory transduction	4	1167	0.366752	0.121275	0.284687
04710	Circadian rhythm	2	30	7.13333	0.127694	0.297238
05214	Glioma	3	74	4.33784	0.129243	0.298337
04726	Serotonergic synapse	4	131	3.26718	0.140096	0.320716
04721	Synaptic vesicle cycle	3	77	4.16883	0.142916	0.32449
04915	Estrogen signaling pathway	4	134	3.19403	0.150284	0.338443
04130	SNARE interactions in vesicular transport	2	33	6.48485	0.152188	0.339969
04728	Dopaminergic synapse	4	135	3.17037	0.153771	0.340757
00500	Starch and sucrose metabolism	2	34	6.29412	0.16072	0.350547
00640	Propanoate metabolism	2	34	6.29412	0.16072	0.350547
04140	Autophagy - animal	4	138	3.10145	0.164511	0.356012
04910	Insulin signaling pathway	4	139	3.07914	0.168183	0.358257
00040	Pentose and glucuronate interconversions	2	35	6.11429	0.169428	0.358257
03030	DNA replication	2	35	6.11429	0.169428	0.358257
04550	Signaling pathways regulating pluripotency of stem cells	4	140	3.05714	0.171901	0.360732
05017	Spinocerebellar ataxia	4	141	3.03546	0.175666	0.36586
05205	Proteoglycans in cancer	5	205	2.60976	0.177339	0.366588
00524	Neomycin, kanamycin and gentamicin biosynthesis	1	5	21.4	0.18346	0.376432
04146	Peroxisome	3	86	3.73256	0.188184	0.380488
04911	Insulin secretion	3	86	3.73256	0.188184	0.380488
04658	Th1 and Th2 cell differentiation	3	88	3.64773	0.199091	0.399625
04024	cAMP signaling pathway	5	215	2.48837	0.209533	0.417558
04151	PI3K-Akt signaling pathway	7	359	2.08635	0.213562	0.420337
00260	Glycine, serine and threonine metabolism	2	40	5.35	0.215479	0.420337
04216	Ferroptosis	2	40	5.35	0.215479	0.420337
00140	Steroid hormone biosynthesis	3	92	3.48913	0.221807	0.429653
04350	TGF-beta signaling pathway	3	95	3.37895	0.239617	0.457751
04640	Hematopoietic cell lineage	3	95	3.37895	0.239617	0.457751
03420	Nucleotide excision repair	2	43	4.97674	0.24498	0.464791
00830	Retinol metabolism	3	97	3.30928	0.251851	0.474577
00564	Glycerophospholipid metabolism	3	98	3.27551	0.258075	0.483019
05215	Prostate cancer	3	99	3.24242	0.26437	0.489847
04934	Cushing syndrome	4	162	2.64198	0.26526	0.489847
04014	Ras signaling pathway	5	232	2.30603	0.271566	0.49817
05204	Chemical carcinogenesis	3	101	3.17822	0.277168	0.505102
04122	Sulfur relay system	1	8	13.375	0.289477	0.524086
04659	Th17 cell differentiation	3	104	3.08654	0.29688	0.527275
04973	Carbohydrate digestion and absorption	2	48	4.45833	0.296949	0.527275
05030	Cocaine addiction	2	48	4.45833	0.296949	0.527275
00520	Amino sugar and nucleotide sugar metabolism	2	50	4.28	0.318637	0.562181
04514	Cell adhesion molecules	4	174	2.45977	0.325274	0.566673
05225	Hepatocellular carcinoma	4	174	2.45977	0.325274	0.566673
04340	Hedgehog signaling pathway	2	52	4.11538	0.3408	0.59001
00330	Arginine and proline metabolism	2	54	3.96296	0.363413	0.625252
04066	HIF-1 signaling pathway	3	114	2.81579	0.366857	0.62728
05163	Human cytomegalovirus infection	5	256	2.08984	0.374547	0.6365
04218	Cellular senescence	4	184	2.32609	0.379943	0.641734
04923	Regulation of lipolysis in adipocytes	2	56	3.82143	0.386452	0.648772
04722	Neurotrophin signaling pathway	3	121	2.65289	0.419505	0.700017
04062	Chemokine signaling pathway	4	192	2.22917	0.426579	0.70756
04152	AMPK signaling pathway	3	126	2.54762	0.458815	0.753437
03450	Non-homologous end-joining	1	13	8.23077	0.459678	0.753437
05330	Allograft rejection	2	63	3.39683	0.470107	0.765998
00310	Lysine degradation	2	64	3.34375	0.482404	0.781438
00533	Glycosaminoglycan biosynthesis - keratan sulfate	1	14	7.64286	0.492771	0.793591
04142	Lysosome	3	131	2.45038	0.499452	0.799701
00010	Glycolysis / Gluconeogenesis	2	67	3.19403	0.519757	0.82743
04622	RIG-I-like receptor signaling pathway	2	70	3.05714	0.557752	0.873306
04940	Type I diabetes mellitus	2	70	3.05714	0.557752	0.873306
00603	Glycosphingolipid biosynthesis - globo and isoglobo series	1	16	6.6875	0.558033	0.873306
04015	Rap1 signaling pathway	4	214	2	0.567035	0.882408
00980	Metabolism of xenobiotics by cytochrome P450	2	73	2.93151	0.596323	0.922801
04270	Vascular smooth muscle contraction	3	143	2.24476	0.601888	0.926238
04917	Prolactin signaling pathway	2	74	2.89189	0.609297	0.927337
04918	Thyroid hormone synthesis	2	74	2.89189	0.609297	0.927337
04924	Renin secretion	2	76	2.81579	0.635409	0.961794
05322	Systemic lupus erythematosus	3	148	2.16892	0.646401	0.973115
05320	Autoimmune thyroid disease	2	79	2.70886	0.674952	1
01210	2-Oxocarboxylic acid metabolism	1	20	5.35	0.684942	1
04921	Oxytocin signaling pathway	3	153	2.09804	0.691869	1
00531	Glycosaminoglycan degradation	1	21	5.09524	0.715933	1
04150	mTOR signaling pathway	3	156	2.05769	0.719573	1
03430	Mismatch repair	1	22	4.86364	0.746634	1
04970	Salivary secretion	2	86	2.48837	0.768692	1
05235	PD-L1 expression and PD-1 checkpoint pathway in cancer	2	88	2.43182	0.795784	1
05160	Hepatitis C	3	165	1.94545	0.804385	1
04727	GABAergic synapse	2	89	2.40449	0.809373	1
04211	Longevity regulating pathway	2	90	2.37778	0.822989	1
04612	Antigen processing and presentation	2	90	2.37778	0.822989	1
04912	GnRH signaling pathway	2	90	2.37778	0.822989	1
05410	Hypertrophic cardiomyopathy	2	91	2.35165	0.836629	1
00563	Glycosylphosphatidylinositol (GPI)-anchor biosynthesis	1	25	4.28	0.837028	1
05310	Asthma	1	25	4.28	0.837028	1
04742	Taste transduction	2	92	2.32609	0.850291	1
04610	Complement and coagulation cascades	2	93	2.30108	0.863975	1
00340	Histidine metabolism	1	26	4.11538	0.866599	1
00790	Folate biosynthesis	1	26	4.11538	0.866599	1
04022	cGMP-PKG signaling pathway	3	173	1.85549	0.881625	1
00601	Glycosphingolipid biosynthesis - lacto and neolacto series	1	27	3.96296	0.895893	1
04392	Hippo signaling pathway - multiple species	1	27	3.96296	0.895893	1
04744	Phototransduction	1	27	3.96296	0.895893	1
04950	Maturity onset diabetes of the young	1	27	3.96296	0.895893	1
03020	RNA polymerase	1	29	3.68966	0.953664	1
03060	Protein export	1	29	3.68966	0.953664	1
04916	Melanogenesis	2	100	2.14	0.960229	1
04976	Bile secretion	2	100	2.14	0.960229	1
04145	Phagosome	3	182	1.76374	0.97019	1
01523	Antifolate resistance	1	30	3.56667	0.982146	1
00053	Ascorbate and aldarate metabolism	1	31	3.45161	1	1
00020	Citrate cycle (TCA cycle)	1	32	3.34375	1	1
00630	Glyoxylate and dicarboxylate metabolism	1	32	3.34375	1	1
04215	Apoptosis - multiple species	1	32	3.34375	1	1
04974	Protein digestion and absorption	2	108	1.98148	1	1
01040	Biosynthesis of unsaturated fatty acids	1	34	3.14706	1	1
00051	Fructose and mannose metabolism	1	36	2.97222	1	1
05340	Primary immunodeficiency	1	36	2.97222	1	1
00250	Alanine, aspartate and glutamate metabolism	1	39	2.74359	1	1
00620	Pyruvate metabolism	1	39	2.74359	1	1
00513	Various types of N-glycan biosynthesis	1	40	2.675	1	1
05033	Nicotine addiction	1	40	2.675	1	1
00760	Nicotinate and nicotinamide metabolism	1	41	2.60976	1	1
05150	Staphylococcus aureus infection	2	124	1.72581	1	1
00860	Porphyrin and chlorophyll metabolism	1	42	2.54762	1	1
04672	Intestinal immune network for IgA production	1	43	2.48837	1	1
04975	Fat digestion and absorption	1	43	2.48837	1	1
04750	Inflammatory mediator regulation of TRP channels	2	127	1.68504	1	1
00565	Ether lipid metabolism	1	48	2.22917	1	1
04371	Apelin signaling pathway	2	137	1.56204	1	1
05206	MicroRNAs in cancer	4	303	1.41254	1	1
00510	N-Glycan biosynthesis	1	50	2.14	1	1
03460	Fanconi anemia pathway	1	51	2.09804	1	1
00380	Tryptophan metabolism	1	52	2.05769	1	1
00270	Cysteine and methionine metabolism	1	53	2.01887	1	1
04072	Phospholipase D signaling pathway	2	149	1.43624	1	1
04370	VEGF signaling pathway	1	58	1.84483	1	1
04929	GnRH secretion	1	63	1.69841	1	1
05332	Graft-versus-host disease	1	63	1.69841	1	1
00970	Aminoacyl-tRNA biosynthesis	1	66	1.62121	1	1
04810	Regulation of actin cytoskeleton	3	220	1.45909	1	1
05230	Central carbon metabolism in cancer	1	69	1.55072	1	1
05203	Viral carcinogenesis	3	229	1.40175	1	1
05221	Acute myeloid leukemia	1	70	1.52857	1	1
00480	Glutathione metabolism	1	71	1.50704	1	1
00982	Drug metabolism - cytochrome P450	1	71	1.50704	1	1
04520	Adherens junction	1	71	1.50704	1	1
04971	Gastric acid secretion	1	75	1.42667	1	1
05412	Arrhythmogenic right ventricular cardiomyopathy	1	77	1.38961	1	1
01524	Platinum drug resistance	1	80	1.3375	1	1
00590	Arachidonic acid metabolism	1	86	1.24419	1	1
04512	ECM-receptor interaction	1	88	1.21591	1	1
05032	Morphine addiction	1	91	1.17582	1	1
01522	Endocrine resistance	1	93	1.15054	1	1
05414	Dilated cardiomyopathy	1	94	1.1383	1	1
04070	Phosphatidylinositol signaling system	1	96	1.11458	1	1
04261	Adrenergic signaling in cardiomyocytes	2	152	1.40789	1	1
04390	Hippo signaling pathway	2	157	1.36306	1	1
04510	Focal adhesion	2	201	1.06468	1	1
05034	Alcoholism	2	205	1.0439	1	1
04144	Endocytosis	3	272	1.18015	1	1
04724	Glutamatergic synapse	1	113	0.946903	1	1
04071	Sphingolipid signaling pathway	1	124	0.862903	1	1
04114	Oocyte meiosis	1	119	0.89916	1	1
04360	Axon guidance	1	181	0.59116	1	1
04530	Tight junction	1	167	0.640719	1	1
04613	Neutrophil extracellular trap formation?New!	1	205	0.521951	1	1
04650	Natural killer cell mediated cytotoxicity	1	121	0.884298	1	1
04919	Thyroid hormone signaling pathway	1	120	0.891667	1	1
04972	Pancreatic secretion	1	114	0.938596	1	1
05165	Human papillomavirus infection	3	362	0.88674	1	1
05170	Human immunodeficiency virus 1 infection	2	240	0.891667	1	1

## Sheet: 显著性Pathway所包含上调基因
path_id	path_name	enrichment	pvalue	FDR	gene_id	gene_name
03010	Ribosome	34.0726	7.75328e-70	2.14766e-67	67248	Rpl39
03010	Ribosome	34.0726	7.75328e-70	2.14766e-67	19982	Rpl36a
03010	Ribosome	34.0726	7.75328e-70	2.14766e-67	66483	Rpl36al
03010	Ribosome	34.0726	7.75328e-70	2.14766e-67	114641	Rpl31
03010	Ribosome	34.0726	7.75328e-70	2.14766e-67	19951	Rpl32
03010	Ribosome	34.0726	7.75328e-70	2.14766e-67	68436	Rpl34
03010	Ribosome	34.0726	7.75328e-70	2.14766e-67	57808	Rpl35a
03010	Ribosome	34.0726	7.75328e-70	2.14766e-67	67281	Rpl37
03010	Ribosome	34.0726	7.75328e-70	2.14766e-67	19988	Rpl6
03010	Ribosome	34.0726	7.75328e-70	2.14766e-67	19934	Rpl22
03010	Ribosome	34.0726	7.75328e-70	2.14766e-67	19944	Rpl29
03010	Ribosome	34.0726	7.75328e-70	2.14766e-67	54217	Rpl36
03010	Ribosome	34.0726	7.75328e-70	2.14766e-67	27176	Rpl7a
03010	Ribosome	34.0726	7.75328e-70	2.14766e-67	110954	Rpl10
03010	Ribosome	34.0726	7.75328e-70	2.14766e-67	67115	Rpl14
03010	Ribosome	34.0726	7.75328e-70	2.14766e-67	78523	Mrpl9
03010	Ribosome	34.0726	7.75328e-70	2.14766e-67	56282	Mrpl12
03010	Ribosome	34.0726	7.75328e-70	2.14766e-67	67186	Rplp2
03010	Ribosome	34.0726	7.75328e-70	2.14766e-67	267019	Rps15a
03010	Ribosome	34.0726	7.75328e-70	2.14766e-67	20055	Rps16
03010	Ribosome	34.0726	7.75328e-70	2.14766e-67	27050	Rps3
03010	Ribosome	34.0726	7.75328e-70	2.14766e-67	64659	Mrps14
03010	Ribosome	34.0726	7.75328e-70	2.14766e-67	66242	Mrps16
03010	Ribosome	34.0726	7.75328e-70	2.14766e-67	68735	Mrps18c
03010	Ribosome	34.0726	7.75328e-70	2.14766e-67	76846	Rps9
03010	Ribosome	34.0726	7.75328e-70	2.14766e-67	66419	Mrpl11
03010	Ribosome	34.0726	7.75328e-70	2.14766e-67	27367	Rpl3
03010	Ribosome	34.0726	7.75328e-70	2.14766e-67	67025	Rpl11
03010	Ribosome	34.0726	7.75328e-70	2.14766e-67	20005	Rpl9
03010	Ribosome	34.0726	7.75328e-70	2.14766e-67	269261	Rpl12
03010	Ribosome	34.0726	7.75328e-70	2.14766e-67	22121	Rpl13a
03010	Ribosome	34.0726	7.75328e-70	2.14766e-67	26961	Rpl8
03010	Ribosome	34.0726	7.75328e-70	2.14766e-67	65019	Rpl23
03010	Ribosome	34.0726	7.75328e-70	2.14766e-67	26451	Rpl27a
03010	Ribosome	34.0726	7.75328e-70	2.14766e-67	268449	Rpl23a
03010	Ribosome	34.0726	7.75328e-70	2.14766e-67	19935	Mrpl23
03010	Ribosome	34.0726	7.75328e-70	2.14766e-67	19989	Rpl7
03010	Ribosome	34.0726	7.75328e-70	2.14766e-67	66480	Rpl15
03010	Ribosome	34.0726	7.75328e-70	2.14766e-67	19921	Rpl19
03010	Ribosome	34.0726	7.75328e-70	2.14766e-67	19933	Rpl21
03010	Ribosome	34.0726	7.75328e-70	2.14766e-67	19946	Rpl30
03010	Ribosome	34.0726	7.75328e-70	2.14766e-67	68052	Rps13
03010	Ribosome	34.0726	7.75328e-70	2.14766e-67	20116	Rps8
03010	Ribosome	34.0726	7.75328e-70	2.14766e-67	20068	Rps17
03010	Ribosome	34.0726	7.75328e-70	2.14766e-67	20085	Rps19
03010	Ribosome	34.0726	7.75328e-70	2.14766e-67	57294	Rps27
03010	Ribosome	34.0726	7.75328e-70	2.14766e-67	78294	Rps27a
03010	Ribosome	34.0726	7.75328e-70	2.14766e-67	20042	Rps12
03010	Ribosome	34.0726	7.75328e-70	2.14766e-67	66481	Rps21
03010	Ribosome	34.0726	7.75328e-70	2.14766e-67	14109	Fau
03010	Ribosome	34.0726	7.75328e-70	2.14766e-67	270106	Rpl13
03010	Ribosome	34.0726	7.75328e-70	2.14766e-67	66475	Rps23
03010	Ribosome	34.0726	7.75328e-70	2.14766e-67	20084	Rps18
03010	Ribosome	34.0726	7.75328e-70	2.14766e-67	20090	Rps29
03010	Ribosome	34.0726	7.75328e-70	2.14766e-67	75617	Rps25
03010	Ribosome	34.0726	7.75328e-70	2.14766e-67	54127	Rps28
03010	Ribosome	34.0726	7.75328e-70	2.14766e-67	20091	Rps3a1
05171	Coronavirus disease - COVID-19?New!	23.8259	9.62616e-58	1.33322e-55	27050	Rps3
05171	Coronavirus disease - COVID-19?New!	23.8259	9.62616e-58	1.33322e-55	20091	Rps3a1
05171	Coronavirus disease - COVID-19?New!	23.8259	9.62616e-58	1.33322e-55	20116	Rps8
05171	Coronavirus disease - COVID-19?New!	23.8259	9.62616e-58	1.33322e-55	267019	Rps15a
05171	Coronavirus disease - COVID-19?New!	23.8259	9.62616e-58	1.33322e-55	66481	Rps21
05171	Coronavirus disease - COVID-19?New!	23.8259	9.62616e-58	1.33322e-55	54127	Rps28
05171	Coronavirus disease - COVID-19?New!	23.8259	9.62616e-58	1.33322e-55	57294	Rps27
05171	Coronavirus disease - COVID-19?New!	23.8259	9.62616e-58	1.33322e-55	66475	Rps23
05171	Coronavirus disease - COVID-19?New!	23.8259	9.62616e-58	1.33322e-55	20005	Rpl9
05171	Coronavirus disease - COVID-19?New!	23.8259	9.62616e-58	1.33322e-55	22121	Rpl13a
05171	Coronavirus disease - COVID-19?New!	23.8259	9.62616e-58	1.33322e-55	26451	Rpl27a
05171	Coronavirus disease - COVID-19?New!	23.8259	9.62616e-58	1.33322e-55	268449	Rpl23a
05171	Coronavirus disease - COVID-19?New!	23.8259	9.62616e-58	1.33322e-55	269261	Rpl12
05171	Coronavirus disease - COVID-19?New!	23.8259	9.62616e-58	1.33322e-55	16176	Il1b
05171	Coronavirus disease - COVID-19?New!	23.8259	9.62616e-58	1.33322e-55	16160	Il12b
05171	Coronavirus disease - COVID-19?New!	23.8259	9.62616e-58	1.33322e-55	18035	Nfkbia
05171	Coronavirus disease - COVID-19?New!	23.8259	9.62616e-58	1.33322e-55	14281	Fos
05171	Coronavirus disease - COVID-19?New!	23.8259	9.62616e-58	1.33322e-55	14109	Fau
05171	Coronavirus disease - COVID-19?New!	23.8259	9.62616e-58	1.33322e-55	20042	Rps12
05171	Coronavirus disease - COVID-19?New!	23.8259	9.62616e-58	1.33322e-55	20055	Rps16
05171	Coronavirus disease - COVID-19?New!	23.8259	9.62616e-58	1.33322e-55	20068	Rps17
05171	Coronavirus disease - COVID-19?New!	23.8259	9.62616e-58	1.33322e-55	20084	Rps18
05171	Coronavirus disease - COVID-19?New!	23.8259	9.62616e-58	1.33322e-55	20085	Rps19
05171	Coronavirus disease - COVID-19?New!	23.8259	9.62616e-58	1.33322e-55	20090	Rps29
05171	Coronavirus disease - COVID-19?New!	23.8259	9.62616e-58	1.33322e-55	67248	Rpl39
05171	Coronavirus disease - COVID-19?New!	23.8259	9.62616e-58	1.33322e-55	67281	Rpl37
05171	Coronavirus disease - COVID-19?New!	23.8259	9.62616e-58	1.33322e-55	68436	Rpl34
05171	Coronavirus disease - COVID-19?New!	23.8259	9.62616e-58	1.33322e-55	216799	Nlrp3
05171	Coronavirus disease - COVID-19?New!	23.8259	9.62616e-58	1.33322e-55	19934	Rpl22
05171	Coronavirus disease - COVID-19?New!	23.8259	9.62616e-58	1.33322e-55	19944	Rpl29
05171	Coronavirus disease - COVID-19?New!	23.8259	9.62616e-58	1.33322e-55	19946	Rpl30
05171	Coronavirus disease - COVID-19?New!	23.8259	9.62616e-58	1.33322e-55	19951	Rpl32
05171	Coronavirus disease - COVID-19?New!	23.8259	9.62616e-58	1.33322e-55	19982	Rpl36a
05171	Coronavirus disease - COVID-19?New!	23.8259	9.62616e-58	1.33322e-55	68052	Rps13
05171	Coronavirus disease - COVID-19?New!	23.8259	9.62616e-58	1.33322e-55	75617	Rps25
05171	Coronavirus disease - COVID-19?New!	23.8259	9.62616e-58	1.33322e-55	76846	Rps9
05171	Coronavirus disease - COVID-19?New!	23.8259	9.62616e-58	1.33322e-55	78294	Rps27a
05171	Coronavirus disease - COVID-19?New!	23.8259	9.62616e-58	1.33322e-55	110954	Rpl10
05171	Coronavirus disease - COVID-19?New!	23.8259	9.62616e-58	1.33322e-55	114641	Rpl31
05171	Coronavirus disease - COVID-19?New!	23.8259	9.62616e-58	1.33322e-55	19921	Rpl19
05171	Coronavirus disease - COVID-19?New!	23.8259	9.62616e-58	1.33322e-55	19933	Rpl21
05171	Coronavirus disease - COVID-19?New!	23.8259	9.62616e-58	1.33322e-55	270106	Rpl13
05171	Coronavirus disease - COVID-19?New!	23.8259	9.62616e-58	1.33322e-55	27176	Rpl7a
05171	Coronavirus disease - COVID-19?New!	23.8259	9.62616e-58	1.33322e-55	27367	Rpl3
05171	Coronavirus disease - COVID-19?New!	23.8259	9.62616e-58	1.33322e-55	54217	Rpl36
05171	Coronavirus disease - COVID-19?New!	23.8259	9.62616e-58	1.33322e-55	57808	Rpl35a
05171	Coronavirus disease - COVID-19?New!	23.8259	9.62616e-58	1.33322e-55	19988	Rpl6
05171	Coronavirus disease - COVID-19?New!	23.8259	9.62616e-58	1.33322e-55	19989	Rpl7
05171	Coronavirus disease - COVID-19?New!	23.8259	9.62616e-58	1.33322e-55	66483	Rpl36al
05171	Coronavirus disease - COVID-19?New!	23.8259	9.62616e-58	1.33322e-55	67025	Rpl11
05171	Coronavirus disease - COVID-19?New!	23.8259	9.62616e-58	1.33322e-55	67115	Rpl14
05171	Coronavirus disease - COVID-19?New!	23.8259	9.62616e-58	1.33322e-55	67186	Rplp2
05171	Coronavirus disease - COVID-19?New!	23.8259	9.62616e-58	1.33322e-55	66480	Rpl15
05171	Coronavirus disease - COVID-19?New!	23.8259	9.62616e-58	1.33322e-55	26961	Rpl8
05171	Coronavirus disease - COVID-19?New!	23.8259	9.62616e-58	1.33322e-55	65019	Rpl23
01100	Metabolic pathways	4.56043	4.67586e-24	4.31738e-22	67126	Atp5e
01100	Metabolic pathways	4.56043	4.67586e-24	4.31738e-22	15442	Hpse
01100	Metabolic pathways	4.56043	4.67586e-24	4.31738e-22	17991	Ndufa2
01100	Metabolic pathways	4.56043	4.67586e-24	4.31738e-22	17992	Ndufa4
01100	Metabolic pathways	4.56043	4.67586e-24	4.31738e-22	66445	Cyc1
01100	Metabolic pathways	4.56043	4.67586e-24	4.31738e-22	66694	Uqcrfs1
01100	Metabolic pathways	4.56043	4.67586e-24	4.31738e-22	110948	Hlcs
01100	Metabolic pathways	4.56043	4.67586e-24	4.31738e-22	66204	Acyp1
01100	Metabolic pathways	4.56043	4.67586e-24	4.31738e-22	13808	Eno3
01100	Metabolic pathways	4.56043	4.67586e-24	4.31738e-22	110074	Dut
01100	Metabolic pathways	4.56043	4.67586e-24	4.31738e-22	11949	Atp5c1
01100	Metabolic pathways	4.56043	4.67586e-24	4.31738e-22	27425	Atp5l
01100	Metabolic pathways	4.56043	4.67586e-24	4.31738e-22	57423	Atp5j2
01100	Metabolic pathways	4.56043	4.67586e-24	4.31738e-22	16365	Acod1
01100	Metabolic pathways	4.56043	4.67586e-24	4.31738e-22	11605	Gla
01100	Metabolic pathways	4.56043	4.67586e-24	4.31738e-22	52538	Acaa2
01100	Metabolic pathways	4.56043	4.67586e-24	4.31738e-22	13076	Cyp1a1
01100	Metabolic pathways	4.56043	4.67586e-24	4.31738e-22	229949	Ak5
01100	Metabolic pathways	4.56043	4.67586e-24	4.31738e-22	230075	Ndufb6
01100	Metabolic pathways	4.56043	4.67586e-24	4.31738e-22	54405	Ndufa1
01100	Metabolic pathways	4.56043	4.67586e-24	4.31738e-22	595136	Ndufs5
01100	Metabolic pathways	4.56043	4.67586e-24	4.31738e-22	66416	Ndufa7
01100	Metabolic pathways	4.56043	4.67586e-24	4.31738e-22	67130	Ndufa6
01100	Metabolic pathways	4.56043	4.67586e-24	4.31738e-22	69875	Ndufa11
01100	Metabolic pathways	4.56043	4.67586e-24	4.31738e-22	64707	Suv39h2
01100	Metabolic pathways	4.56043	4.67586e-24	4.31738e-22	67956	Kmt5a
01100	Metabolic pathways	4.56043	4.67586e-24	4.31738e-22	231510	Gpat3
01100	Metabolic pathways	4.56043	4.67586e-24	4.31738e-22	18476	Pafah1b3
01100	Metabolic pathways	4.56043	4.67586e-24	4.31738e-22	74442	Sgms2
01100	Metabolic pathways	4.56043	4.67586e-24	4.31738e-22	77626	Smpd4
01100	Metabolic pathways	4.56043	4.67586e-24	4.31738e-22	19225	Ptgs2
01100	Metabolic pathways	4.56043	4.67586e-24	4.31738e-22	74080	Nmnat3
01100	Metabolic pathways	4.56043	4.67586e-24	4.31738e-22	56176	Pigp
01100	Metabolic pathways	4.56043	4.67586e-24	4.31738e-22	102637973	Gm34653
01100	Metabolic pathways	4.56043	4.67586e-24	4.31738e-22	12857	Cox4i1
01100	Metabolic pathways	4.56043	4.67586e-24	4.31738e-22	12861	Cox6a1
01100	Metabolic pathways	4.56043	4.67586e-24	4.31738e-22	84682	Cox4i2
01100	Metabolic pathways	4.56043	4.67586e-24	4.31738e-22	394432	Ugt1a7c
01100	Metabolic pathways	4.56043	4.67586e-24	4.31738e-22	67834	Idh3a
01100	Metabolic pathways	4.56043	4.67586e-24	4.31738e-22	171210	Acot2
01100	Metabolic pathways	4.56043	4.67586e-24	4.31738e-22	18263	Odc1
01100	Metabolic pathways	4.56043	4.67586e-24	4.31738e-22	19309	Pygm
01100	Metabolic pathways	4.56043	4.67586e-24	4.31738e-22	11565	Adssl1
01100	Metabolic pathways	4.56043	4.67586e-24	4.31738e-22	102216272	Ak6
01100	Metabolic pathways	4.56043	4.67586e-24	4.31738e-22	66904	Pccb
01100	Metabolic pathways	4.56043	4.67586e-24	4.31738e-22	209027	Pycr1
01100	Metabolic pathways	4.56043	4.67586e-24	4.31738e-22	22272	Uqcrq
01100	Metabolic pathways	4.56043	4.67586e-24	4.31738e-22	12411	Cbs
01100	Metabolic pathways	4.56043	4.67586e-24	4.31738e-22	68631	Cryl1
01100	Metabolic pathways	4.56043	4.67586e-24	4.31738e-22	14635	Galk1
01100	Metabolic pathways	4.56043	4.67586e-24	4.31738e-22	78038	Mccc2
01100	Metabolic pathways	4.56043	4.67586e-24	4.31738e-22	18102	Nme1
01100	Metabolic pathways	4.56043	4.67586e-24	4.31738e-22	18103	Nme2
01100	Metabolic pathways	4.56043	4.67586e-24	4.31738e-22	68695	Hddc3
01100	Metabolic pathways	4.56043	4.67586e-24	4.31738e-22	14923	Guk1
01100	Metabolic pathways	4.56043	4.67586e-24	4.31738e-22	110197	Dgkg
01100	Metabolic pathways	4.56043	4.67586e-24	4.31738e-22	257633	Acsf3
01100	Metabolic pathways	4.56043	4.67586e-24	4.31738e-22	230815	Man1c1
01100	Metabolic pathways	4.56043	4.67586e-24	4.31738e-22	11647	Alpl
01100	Metabolic pathways	4.56043	4.67586e-24	4.31738e-22	140483	Hnmt
01100	Metabolic pathways	4.56043	4.67586e-24	4.31738e-22	11370	Acadvl
01100	Metabolic pathways	4.56043	4.67586e-24	4.31738e-22	12040	Bckdhb
01100	Metabolic pathways	4.56043	4.67586e-24	4.31738e-22	216019	Hkdc1
01100	Metabolic pathways	4.56043	4.67586e-24	4.31738e-22	12660	Chka
01100	Metabolic pathways	4.56043	4.67586e-24	4.31738e-22	14979	H2-Ke6
01100	Metabolic pathways	4.56043	4.67586e-24	4.31738e-22	328845	Acsbg2
01100	Metabolic pathways	4.56043	4.67586e-24	4.31738e-22	26912	Gcat
05022	Pathways of neurodegeneration - multiple diseases?New!	8.38771	4.16047e-22	2.88113e-20	20655	Sod1
05022	Pathways of neurodegeneration - multiple diseases?New!	8.38771	4.16047e-22	2.88113e-20	19172	Psmb4
05022	Pathways of neurodegeneration - multiple diseases?New!	8.38771	4.16047e-22	2.88113e-20	26444	Psma7
05022	Pathways of neurodegeneration - multiple diseases?New!	8.38771	4.16047e-22	2.88113e-20	19185	Psmd4
05022	Pathways of neurodegeneration - multiple diseases?New!	8.38771	4.16047e-22	2.88113e-20	17991	Ndufa2
05022	Pathways of neurodegeneration - multiple diseases?New!	8.38771	4.16047e-22	2.88113e-20	17992	Ndufa4
05022	Pathways of neurodegeneration - multiple diseases?New!	8.38771	4.16047e-22	2.88113e-20	230075	Ndufb6
05022	Pathways of neurodegeneration - multiple diseases?New!	8.38771	4.16047e-22	2.88113e-20	66694	Uqcrfs1
05022	Pathways of neurodegeneration - multiple diseases?New!	8.38771	4.16047e-22	2.88113e-20	12857	Cox4i1
05022	Pathways of neurodegeneration - multiple diseases?New!	8.38771	4.16047e-22	2.88113e-20	12861	Cox6a1
05022	Pathways of neurodegeneration - multiple diseases?New!	8.38771	4.16047e-22	2.88113e-20	66445	Cyc1
05022	Pathways of neurodegeneration - multiple diseases?New!	8.38771	4.16047e-22	2.88113e-20	84682	Cox4i2
05022	Pathways of neurodegeneration - multiple diseases?New!	8.38771	4.16047e-22	2.88113e-20	11949	Atp5c1
05022	Pathways of neurodegeneration - multiple diseases?New!	8.38771	4.16047e-22	2.88113e-20	67126	Atp5e
05022	Pathways of neurodegeneration - multiple diseases?New!	8.38771	4.16047e-22	2.88113e-20	13198	Ddit3
05022	Pathways of neurodegeneration - multiple diseases?New!	8.38771	4.16047e-22	2.88113e-20	14828	Hspa5
05022	Pathways of neurodegeneration - multiple diseases?New!	8.38771	4.16047e-22	2.88113e-20	54405	Ndufa1
05022	Pathways of neurodegeneration - multiple diseases?New!	8.38771	4.16047e-22	2.88113e-20	595136	Ndufs5
05022	Pathways of neurodegeneration - multiple diseases?New!	8.38771	4.16047e-22	2.88113e-20	66416	Ndufa7
05022	Pathways of neurodegeneration - multiple diseases?New!	8.38771	4.16047e-22	2.88113e-20	67130	Ndufa6
05022	Pathways of neurodegeneration - multiple diseases?New!	8.38771	4.16047e-22	2.88113e-20	69875	Ndufa11
05022	Pathways of neurodegeneration - multiple diseases?New!	8.38771	4.16047e-22	2.88113e-20	22272	Uqcrq
05022	Pathways of neurodegeneration - multiple diseases?New!	8.38771	4.16047e-22	2.88113e-20	212398	Frat2
05022	Pathways of neurodegeneration - multiple diseases?New!	8.38771	4.16047e-22	2.88113e-20	234130	Dkk4
05022	Pathways of neurodegeneration - multiple diseases?New!	8.38771	4.16047e-22	2.88113e-20	19225	Ptgs2
05022	Pathways of neurodegeneration - multiple diseases?New!	8.38771	4.16047e-22	2.88113e-20	22187	Ubb
05022	Pathways of neurodegeneration - multiple diseases?New!	8.38771	4.16047e-22	2.88113e-20	22190	Ubc
05022	Pathways of neurodegeneration - multiple diseases?New!	8.38771	4.16047e-22	2.88113e-20	78294	Rps27a
05022	Pathways of neurodegeneration - multiple diseases?New!	8.38771	4.16047e-22	2.88113e-20	12671	Chrm3
05022	Pathways of neurodegeneration - multiple diseases?New!	8.38771	4.16047e-22	2.88113e-20	69926	Dnah17
05022	Pathways of neurodegeneration - multiple diseases?New!	8.38771	4.16047e-22	2.88113e-20	69654	Dctn2
05022	Pathways of neurodegeneration - multiple diseases?New!	8.38771	4.16047e-22	2.88113e-20	233908	Fus
05022	Pathways of neurodegeneration - multiple diseases?New!	8.38771	4.16047e-22	2.88113e-20	240960	Dnah14
05022	Pathways of neurodegeneration - multiple diseases?New!	8.38771	4.16047e-22	2.88113e-20	16176	Il1b
05022	Pathways of neurodegeneration - multiple diseases?New!	8.38771	4.16047e-22	2.88113e-20	12569	Cdk5r1
05022	Pathways of neurodegeneration - multiple diseases?New!	8.38771	4.16047e-22	2.88113e-20	327954	Dnah2
05022	Pathways of neurodegeneration - multiple diseases?New!	8.38771	4.16047e-22	2.88113e-20	12289	Cacna1d
05020	Prion disease	10.7799	4.05864e-19	2.24849e-17	19185	Psmd4
05020	Prion disease	10.7799	4.05864e-19	2.24849e-17	67126	Atp5e
05020	Prion disease	10.7799	4.05864e-19	2.24849e-17	20655	Sod1
05020	Prion disease	10.7799	4.05864e-19	2.24849e-17	12289	Cacna1d
05020	Prion disease	10.7799	4.05864e-19	2.24849e-17	12857	Cox4i1
05020	Prion disease	10.7799	4.05864e-19	2.24849e-17	15512	Hspa2
05020	Prion disease	10.7799	4.05864e-19	2.24849e-17	12861	Cox6a1
05020	Prion disease	10.7799	4.05864e-19	2.24849e-17	13653	Egr1
05020	Prion disease	10.7799	4.05864e-19	2.24849e-17	16176	Il1b
05020	Prion disease	10.7799	4.05864e-19	2.24849e-17	19172	Psmb4
05020	Prion disease	10.7799	4.05864e-19	2.24849e-17	26444	Psma7
05020	Prion disease	10.7799	4.05864e-19	2.24849e-17	230075	Ndufb6
05020	Prion disease	10.7799	4.05864e-19	2.24849e-17	54405	Ndufa1
05020	Prion disease	10.7799	4.05864e-19	2.24849e-17	78284	Creb3l4
05020	Prion disease	10.7799	4.05864e-19	2.24849e-17	69875	Ndufa11
05020	Prion disease	10.7799	4.05864e-19	2.24849e-17	22272	Uqcrq
05020	Prion disease	10.7799	4.05864e-19	2.24849e-17	66445	Cyc1
05020	Prion disease	10.7799	4.05864e-19	2.24849e-17	66694	Uqcrfs1
05020	Prion disease	10.7799	4.05864e-19	2.24849e-17	11949	Atp5c1
05020	Prion disease	10.7799	4.05864e-19	2.24849e-17	17992	Ndufa4
05020	Prion disease	10.7799	4.05864e-19	2.24849e-17	67130	Ndufa6
05020	Prion disease	10.7799	4.05864e-19	2.24849e-17	84682	Cox4i2
05020	Prion disease	10.7799	4.05864e-19	2.24849e-17	13198	Ddit3
05020	Prion disease	10.7799	4.05864e-19	2.24849e-17	66416	Ndufa7
05020	Prion disease	10.7799	4.05864e-19	2.24849e-17	595136	Ndufs5
05020	Prion disease	10.7799	4.05864e-19	2.24849e-17	17991	Ndufa2
05020	Prion disease	10.7799	4.05864e-19	2.24849e-17	14828	Hspa5
05012	Parkinson disease	11.2632	6.42957e-19	2.96832e-17	19252	Dusp1
05012	Parkinson disease	11.2632	6.42957e-19	2.96832e-17	230075	Ndufb6
05012	Parkinson disease	11.2632	6.42957e-19	2.96832e-17	17992	Ndufa4
05012	Parkinson disease	11.2632	6.42957e-19	2.96832e-17	595136	Ndufs5
05012	Parkinson disease	11.2632	6.42957e-19	2.96832e-17	19185	Psmd4
05012	Parkinson disease	11.2632	6.42957e-19	2.96832e-17	69875	Ndufa11
05012	Parkinson disease	11.2632	6.42957e-19	2.96832e-17	22272	Uqcrq
05012	Parkinson disease	11.2632	6.42957e-19	2.96832e-17	66416	Ndufa7
05012	Parkinson disease	11.2632	6.42957e-19	2.96832e-17	67130	Ndufa6
05012	Parkinson disease	11.2632	6.42957e-19	2.96832e-17	22190	Ubc
05012	Parkinson disease	11.2632	6.42957e-19	2.96832e-17	78294	Rps27a
05012	Parkinson disease	11.2632	6.42957e-19	2.96832e-17	17991	Ndufa2
05012	Parkinson disease	11.2632	6.42957e-19	2.96832e-17	84682	Cox4i2
05012	Parkinson disease	11.2632	6.42957e-19	2.96832e-17	54405	Ndufa1
05012	Parkinson disease	11.2632	6.42957e-19	2.96832e-17	67126	Atp5e
05012	Parkinson disease	11.2632	6.42957e-19	2.96832e-17	13198	Ddit3
05012	Parkinson disease	11.2632	6.42957e-19	2.96832e-17	14828	Hspa5
05012	Parkinson disease	11.2632	6.42957e-19	2.96832e-17	19172	Psmb4
05012	Parkinson disease	11.2632	6.42957e-19	2.96832e-17	26444	Psma7
05012	Parkinson disease	11.2632	6.42957e-19	2.96832e-17	12857	Cox4i1
05012	Parkinson disease	11.2632	6.42957e-19	2.96832e-17	12861	Cox6a1
05012	Parkinson disease	11.2632	6.42957e-19	2.96832e-17	22187	Ubb
05012	Parkinson disease	11.2632	6.42957e-19	2.96832e-17	66694	Uqcrfs1
05012	Parkinson disease	11.2632	6.42957e-19	2.96832e-17	14680	Gnal
05012	Parkinson disease	11.2632	6.42957e-19	2.96832e-17	11949	Atp5c1
05012	Parkinson disease	11.2632	6.42957e-19	2.96832e-17	66445	Cyc1
05014	Amyotrophic lateral sclerosis	8.69919	1.673e-18	6.62029e-17	67126	Atp5e
05014	Amyotrophic lateral sclerosis	8.69919	1.673e-18	6.62029e-17	69654	Dctn2
05014	Amyotrophic lateral sclerosis	8.69919	1.673e-18	6.62029e-17	66694	Uqcrfs1
05014	Amyotrophic lateral sclerosis	8.69919	1.673e-18	6.62029e-17	13198	Ddit3
05014	Amyotrophic lateral sclerosis	8.69919	1.673e-18	6.62029e-17	12861	Cox6a1
05014	Amyotrophic lateral sclerosis	8.69919	1.673e-18	6.62029e-17	11949	Atp5c1
05014	Amyotrophic lateral sclerosis	8.69919	1.673e-18	6.62029e-17	15382	Hnrnpa1
05014	Amyotrophic lateral sclerosis	8.69919	1.673e-18	6.62029e-17	233908	Fus
05014	Amyotrophic lateral sclerosis	8.69919	1.673e-18	6.62029e-17	84682	Cox4i2
05014	Amyotrophic lateral sclerosis	8.69919	1.673e-18	6.62029e-17	230075	Ndufb6
05014	Amyotrophic lateral sclerosis	8.69919	1.673e-18	6.62029e-17	54405	Ndufa1
05014	Amyotrophic lateral sclerosis	8.69919	1.673e-18	6.62029e-17	595136	Ndufs5
05014	Amyotrophic lateral sclerosis	8.69919	1.673e-18	6.62029e-17	66416	Ndufa7
05014	Amyotrophic lateral sclerosis	8.69919	1.673e-18	6.62029e-17	67130	Ndufa6
05014	Amyotrophic lateral sclerosis	8.69919	1.673e-18	6.62029e-17	69875	Ndufa11
05014	Amyotrophic lateral sclerosis	8.69919	1.673e-18	6.62029e-17	12857	Cox4i1
05014	Amyotrophic lateral sclerosis	8.69919	1.673e-18	6.62029e-17	66445	Cyc1
05014	Amyotrophic lateral sclerosis	8.69919	1.673e-18	6.62029e-17	327954	Dnah2
05014	Amyotrophic lateral sclerosis	8.69919	1.673e-18	6.62029e-17	69926	Dnah17
05014	Amyotrophic lateral sclerosis	8.69919	1.673e-18	6.62029e-17	19172	Psmb4
05014	Amyotrophic lateral sclerosis	8.69919	1.673e-18	6.62029e-17	26444	Psma7
05014	Amyotrophic lateral sclerosis	8.69919	1.673e-18	6.62029e-17	20655	Sod1
05014	Amyotrophic lateral sclerosis	8.69919	1.673e-18	6.62029e-17	14828	Hspa5
05014	Amyotrophic lateral sclerosis	8.69919	1.673e-18	6.62029e-17	17991	Ndufa2
05014	Amyotrophic lateral sclerosis	8.69919	1.673e-18	6.62029e-17	22272	Uqcrq
05014	Amyotrophic lateral sclerosis	8.69919	1.673e-18	6.62029e-17	19185	Psmd4
05014	Amyotrophic lateral sclerosis	8.69919	1.673e-18	6.62029e-17	17992	Ndufa4
05014	Amyotrophic lateral sclerosis	8.69919	1.673e-18	6.62029e-17	240960	Dnah14
05014	Amyotrophic lateral sclerosis	8.69919	1.673e-18	6.62029e-17	110379	Sec13
05014	Amyotrophic lateral sclerosis	8.69919	1.673e-18	6.62029e-17	21681	Alyref
05016	Huntington disease	9.56623	8.88788e-18	3.07743e-16	67126	Atp5e
05016	Huntington disease	9.56623	8.88788e-18	3.07743e-16	69926	Dnah17
05016	Huntington disease	9.56623	8.88788e-18	3.07743e-16	240960	Dnah14
05016	Huntington disease	9.56623	8.88788e-18	3.07743e-16	17749	Polr2k
05016	Huntington disease	9.56623	8.88788e-18	3.07743e-16	19172	Psmb4
05016	Huntington disease	9.56623	8.88788e-18	3.07743e-16	327954	Dnah2
05016	Huntington disease	9.56623	8.88788e-18	3.07743e-16	78284	Creb3l4
05016	Huntington disease	9.56623	8.88788e-18	3.07743e-16	12857	Cox4i1
05016	Huntington disease	9.56623	8.88788e-18	3.07743e-16	11949	Atp5c1
05016	Huntington disease	9.56623	8.88788e-18	3.07743e-16	230075	Ndufb6
05016	Huntington disease	9.56623	8.88788e-18	3.07743e-16	66694	Uqcrfs1
05016	Huntington disease	9.56623	8.88788e-18	3.07743e-16	84682	Cox4i2
05016	Huntington disease	9.56623	8.88788e-18	3.07743e-16	20655	Sod1
05016	Huntington disease	9.56623	8.88788e-18	3.07743e-16	69654	Dctn2
05016	Huntington disease	9.56623	8.88788e-18	3.07743e-16	54405	Ndufa1
05016	Huntington disease	9.56623	8.88788e-18	3.07743e-16	72504	Taf4b
05016	Huntington disease	9.56623	8.88788e-18	3.07743e-16	19185	Psmd4
05016	Huntington disease	9.56623	8.88788e-18	3.07743e-16	17992	Ndufa4
05016	Huntington disease	9.56623	8.88788e-18	3.07743e-16	22272	Uqcrq
05016	Huntington disease	9.56623	8.88788e-18	3.07743e-16	66445	Cyc1
05016	Huntington disease	9.56623	8.88788e-18	3.07743e-16	595136	Ndufs5
05016	Huntington disease	9.56623	8.88788e-18	3.07743e-16	67130	Ndufa6
05016	Huntington disease	9.56623	8.88788e-18	3.07743e-16	69875	Ndufa11
05016	Huntington disease	9.56623	8.88788e-18	3.07743e-16	26444	Psma7
05016	Huntington disease	9.56623	8.88788e-18	3.07743e-16	12861	Cox6a1
05016	Huntington disease	9.56623	8.88788e-18	3.07743e-16	66416	Ndufa7
05016	Huntington disease	9.56623	8.88788e-18	3.07743e-16	17991	Ndufa2
05010	Alzheimer disease	8.40921	1.63322e-17	5.02669e-16	11785	Apbb1
05010	Alzheimer disease	8.40921	1.63322e-17	5.02669e-16	384783	Irs2
05010	Alzheimer disease	8.40921	1.63322e-17	5.02669e-16	19172	Psmb4
05010	Alzheimer disease	8.40921	1.63322e-17	5.02669e-16	26444	Psma7
05010	Alzheimer disease	8.40921	1.63322e-17	5.02669e-16	19185	Psmd4
05010	Alzheimer disease	8.40921	1.63322e-17	5.02669e-16	13198	Ddit3
05010	Alzheimer disease	8.40921	1.63322e-17	5.02669e-16	67126	Atp5e
05010	Alzheimer disease	8.40921	1.63322e-17	5.02669e-16	12569	Cdk5r1
05010	Alzheimer disease	8.40921	1.63322e-17	5.02669e-16	17991	Ndufa2
05010	Alzheimer disease	8.40921	1.63322e-17	5.02669e-16	17992	Ndufa4
05010	Alzheimer disease	8.40921	1.63322e-17	5.02669e-16	16176	Il1b
05010	Alzheimer disease	8.40921	1.63322e-17	5.02669e-16	12857	Cox4i1
05010	Alzheimer disease	8.40921	1.63322e-17	5.02669e-16	234130	Dkk4
05010	Alzheimer disease	8.40921	1.63322e-17	5.02669e-16	19225	Ptgs2
05010	Alzheimer disease	8.40921	1.63322e-17	5.02669e-16	22272	Uqcrq
05010	Alzheimer disease	8.40921	1.63322e-17	5.02669e-16	12289	Cacna1d
05010	Alzheimer disease	8.40921	1.63322e-17	5.02669e-16	66694	Uqcrfs1
05010	Alzheimer disease	8.40921	1.63322e-17	5.02669e-16	12861	Cox6a1
05010	Alzheimer disease	8.40921	1.63322e-17	5.02669e-16	84682	Cox4i2
05010	Alzheimer disease	8.40921	1.63322e-17	5.02669e-16	66445	Cyc1
05010	Alzheimer disease	8.40921	1.63322e-17	5.02669e-16	12671	Chrm3
05010	Alzheimer disease	8.40921	1.63322e-17	5.02669e-16	67130	Ndufa6
05010	Alzheimer disease	8.40921	1.63322e-17	5.02669e-16	69875	Ndufa11
05010	Alzheimer disease	8.40921	1.63322e-17	5.02669e-16	230075	Ndufb6
05010	Alzheimer disease	8.40921	1.63322e-17	5.02669e-16	212398	Frat2
05010	Alzheimer disease	8.40921	1.63322e-17	5.02669e-16	54405	Ndufa1
05010	Alzheimer disease	8.40921	1.63322e-17	5.02669e-16	11949	Atp5c1
05010	Alzheimer disease	8.40921	1.63322e-17	5.02669e-16	66416	Ndufa7
05010	Alzheimer disease	8.40921	1.63322e-17	5.02669e-16	595136	Ndufs5
04932	Non-alcoholic fatty liver disease	14.1722	1.05129e-16	2.91208e-15	12861	Cox6a1
04932	Non-alcoholic fatty liver disease	14.1722	1.05129e-16	2.91208e-15	67130	Ndufa6
04932	Non-alcoholic fatty liver disease	14.1722	1.05129e-16	2.91208e-15	12857	Cox4i1
04932	Non-alcoholic fatty liver disease	14.1722	1.05129e-16	2.91208e-15	230075	Ndufb6
04932	Non-alcoholic fatty liver disease	14.1722	1.05129e-16	2.91208e-15	84682	Cox4i2
04932	Non-alcoholic fatty liver disease	14.1722	1.05129e-16	2.91208e-15	69875	Ndufa11
04932	Non-alcoholic fatty liver disease	14.1722	1.05129e-16	2.91208e-15	17992	Ndufa4
04932	Non-alcoholic fatty liver disease	14.1722	1.05129e-16	2.91208e-15	384783	Irs2
04932	Non-alcoholic fatty liver disease	14.1722	1.05129e-16	2.91208e-15	595136	Ndufs5
04932	Non-alcoholic fatty liver disease	14.1722	1.05129e-16	2.91208e-15	66416	Ndufa7
04932	Non-alcoholic fatty liver disease	14.1722	1.05129e-16	2.91208e-15	17991	Ndufa2
04932	Non-alcoholic fatty liver disease	14.1722	1.05129e-16	2.91208e-15	22272	Uqcrq
04932	Non-alcoholic fatty liver disease	14.1722	1.05129e-16	2.91208e-15	66445	Cyc1
04932	Non-alcoholic fatty liver disease	14.1722	1.05129e-16	2.91208e-15	66694	Uqcrfs1
04932	Non-alcoholic fatty liver disease	14.1722	1.05129e-16	2.91208e-15	12702	Socs3
04932	Non-alcoholic fatty liver disease	14.1722	1.05129e-16	2.91208e-15	13198	Ddit3
04932	Non-alcoholic fatty liver disease	14.1722	1.05129e-16	2.91208e-15	14281	Fos
04932	Non-alcoholic fatty liver disease	14.1722	1.05129e-16	2.91208e-15	54405	Ndufa1
04932	Non-alcoholic fatty liver disease	14.1722	1.05129e-16	2.91208e-15	58805	Mlxipl
04932	Non-alcoholic fatty liver disease	14.1722	1.05129e-16	2.91208e-15	16176	Il1b
03040	Spliceosome	15.1716	1.78023e-16	4.48295e-15	50783	Lsm4
03040	Spliceosome	15.1716	1.78023e-16	4.48295e-15	76938	Rbm17
03040	Spliceosome	15.1716	1.78023e-16	4.48295e-15	15382	Hnrnpa1
03040	Spliceosome	15.1716	1.78023e-16	4.48295e-15	15512	Hspa2
03040	Spliceosome	15.1716	1.78023e-16	4.48295e-15	68592	Syf2
03040	Spliceosome	15.1716	1.78023e-16	4.48295e-15	66094	Lsm7
03040	Spliceosome	15.1716	1.78023e-16	4.48295e-15	69878	Snrpf
03040	Spliceosome	15.1716	1.78023e-16	4.48295e-15	68981	Snrpa1
03040	Spliceosome	15.1716	1.78023e-16	4.48295e-15	233908	Fus
03040	Spliceosome	15.1716	1.78023e-16	4.48295e-15	21681	Alyref
03040	Spliceosome	15.1716	1.78023e-16	4.48295e-15	20384	Srsf5
03040	Spliceosome	15.1716	1.78023e-16	4.48295e-15	66070	Cwc15
03040	Spliceosome	15.1716	1.78023e-16	4.48295e-15	20227	Sart1
03040	Spliceosome	15.1716	1.78023e-16	4.48295e-15	20643	Snrpe
03040	Spliceosome	15.1716	1.78023e-16	4.48295e-15	107686	Snrpd2
03040	Spliceosome	15.1716	1.78023e-16	4.48295e-15	66373	Lsm5
03040	Spliceosome	15.1716	1.78023e-16	4.48295e-15	17149	Magoh
03040	Spliceosome	15.1716	1.78023e-16	4.48295e-15	60365	Rbm8a
03040	Spliceosome	15.1716	1.78023e-16	4.48295e-15	20641	Snrpd1
00190	Oxidative phosphorylation	14.4812	2.77728e-15	6.41089e-14	66416	Ndufa7
00190	Oxidative phosphorylation	14.4812	2.77728e-15	6.41089e-14	67130	Ndufa6
00190	Oxidative phosphorylation	14.4812	2.77728e-15	6.41089e-14	17991	Ndufa2
00190	Oxidative phosphorylation	14.4812	2.77728e-15	6.41089e-14	66694	Uqcrfs1
00190	Oxidative phosphorylation	14.4812	2.77728e-15	6.41089e-14	12861	Cox6a1
00190	Oxidative phosphorylation	14.4812	2.77728e-15	6.41089e-14	84682	Cox4i2
00190	Oxidative phosphorylation	14.4812	2.77728e-15	6.41089e-14	22272	Uqcrq
00190	Oxidative phosphorylation	14.4812	2.77728e-15	6.41089e-14	230075	Ndufb6
00190	Oxidative phosphorylation	14.4812	2.77728e-15	6.41089e-14	69875	Ndufa11
00190	Oxidative phosphorylation	14.4812	2.77728e-15	6.41089e-14	67126	Atp5e
00190	Oxidative phosphorylation	14.4812	2.77728e-15	6.41089e-14	12857	Cox4i1
00190	Oxidative phosphorylation	14.4812	2.77728e-15	6.41089e-14	11949	Atp5c1
00190	Oxidative phosphorylation	14.4812	2.77728e-15	6.41089e-14	54405	Ndufa1
00190	Oxidative phosphorylation	14.4812	2.77728e-15	6.41089e-14	66445	Cyc1
00190	Oxidative phosphorylation	14.4812	2.77728e-15	6.41089e-14	17992	Ndufa4
00190	Oxidative phosphorylation	14.4812	2.77728e-15	6.41089e-14	595136	Ndufs5
00190	Oxidative phosphorylation	14.4812	2.77728e-15	6.41089e-14	27425	Atp5l
00190	Oxidative phosphorylation	14.4812	2.77728e-15	6.41089e-14	57423	Atp5j2
04714	Thermogenesis	9.76957	3.48697e-14	7.42992e-13	54405	Ndufa1
04714	Thermogenesis	9.76957	3.48697e-14	7.42992e-13	57279	Slc25a20
04714	Thermogenesis	9.76957	3.48697e-14	7.42992e-13	230075	Ndufb6
04714	Thermogenesis	9.76957	3.48697e-14	7.42992e-13	66445	Cyc1
04714	Thermogenesis	9.76957	3.48697e-14	7.42992e-13	67130	Ndufa6
04714	Thermogenesis	9.76957	3.48697e-14	7.42992e-13	22272	Uqcrq
04714	Thermogenesis	9.76957	3.48697e-14	7.42992e-13	84682	Cox4i2
04714	Thermogenesis	9.76957	3.48697e-14	7.42992e-13	12857	Cox4i1
04714	Thermogenesis	9.76957	3.48697e-14	7.42992e-13	12861	Cox6a1
04714	Thermogenesis	9.76957	3.48697e-14	7.42992e-13	69875	Ndufa11
04714	Thermogenesis	9.76957	3.48697e-14	7.42992e-13	17992	Ndufa4
04714	Thermogenesis	9.76957	3.48697e-14	7.42992e-13	67126	Atp5e
04714	Thermogenesis	9.76957	3.48697e-14	7.42992e-13	27425	Atp5l
04714	Thermogenesis	9.76957	3.48697e-14	7.42992e-13	66694	Uqcrfs1
04714	Thermogenesis	9.76957	3.48697e-14	7.42992e-13	66416	Ndufa7
04714	Thermogenesis	9.76957	3.48697e-14	7.42992e-13	11949	Atp5c1
04714	Thermogenesis	9.76957	3.48697e-14	7.42992e-13	78284	Creb3l4
04714	Thermogenesis	9.76957	3.48697e-14	7.42992e-13	12894	Cpt1a
04714	Thermogenesis	9.76957	3.48697e-14	7.42992e-13	17991	Ndufa2
04714	Thermogenesis	9.76957	3.48697e-14	7.42992e-13	57423	Atp5j2
04714	Thermogenesis	9.76957	3.48697e-14	7.42992e-13	595136	Ndufs5
04668	TNF signaling pathway	10.4159	4.30901e-08	8.52568e-07	19225	Ptgs2
04668	TNF signaling pathway	10.4159	4.30901e-08	8.52568e-07	20310	Cxcl2
04668	TNF signaling pathway	10.4159	4.30901e-08	8.52568e-07	18035	Nfkbia
04668	TNF signaling pathway	10.4159	4.30901e-08	8.52568e-07	21929	Tnfaip3
04668	TNF signaling pathway	10.4159	4.30901e-08	8.52568e-07	12702	Socs3
04668	TNF signaling pathway	10.4159	4.30901e-08	8.52568e-07	14281	Fos
04668	TNF signaling pathway	10.4159	4.30901e-08	8.52568e-07	78284	Creb3l4
04668	TNF signaling pathway	10.4159	4.30901e-08	8.52568e-07	16176	Il1b
04668	TNF signaling pathway	10.4159	4.30901e-08	8.52568e-07	13614	Edn1
04668	TNF signaling pathway	10.4159	4.30901e-08	8.52568e-07	12608	Cebpb
04668	TNF signaling pathway	10.4159	4.30901e-08	8.52568e-07	16477	Junb
04010	MAPK signaling pathway	5.82313	1.02164e-07	1.88663e-06	15512	Hspa2
04010	MAPK signaling pathway	5.82313	1.02164e-07	1.88663e-06	16176	Il1b
04010	MAPK signaling pathway	5.82313	1.02164e-07	1.88663e-06	15370	Nr4a1
04010	MAPK signaling pathway	5.82313	1.02164e-07	1.88663e-06	13198	Ddit3
04010	MAPK signaling pathway	5.82313	1.02164e-07	1.88663e-06	14171	Fgf17
04010	MAPK signaling pathway	5.82313	1.02164e-07	1.88663e-06	23882	Gadd45g
04010	MAPK signaling pathway	5.82313	1.02164e-07	1.88663e-06	17873	Gadd45b
04010	MAPK signaling pathway	5.82313	1.02164e-07	1.88663e-06	22340	Vegfb
04010	MAPK signaling pathway	5.82313	1.02164e-07	1.88663e-06	240672	Dusp5
04010	MAPK signaling pathway	5.82313	1.02164e-07	1.88663e-06	19252	Dusp1
04010	MAPK signaling pathway	5.82313	1.02164e-07	1.88663e-06	14281	Fos
04010	MAPK signaling pathway	5.82313	1.02164e-07	1.88663e-06	16478	Jund
04010	MAPK signaling pathway	5.82313	1.02164e-07	1.88663e-06	12289	Cacna1d
04010	MAPK signaling pathway	5.82313	1.02164e-07	1.88663e-06	63953	Dusp10
04010	MAPK signaling pathway	5.82313	1.02164e-07	1.88663e-06	13197	Gadd45a
04010	MAPK signaling pathway	5.82313	1.02164e-07	1.88663e-06	64654	Fgf23
04064	NF-kappa B signaling pathway	10.1905	2.47715e-07	4.28857e-06	19225	Ptgs2
04064	NF-kappa B signaling pathway	10.1905	2.47715e-07	4.28857e-06	13197	Gadd45a
04064	NF-kappa B signaling pathway	10.1905	2.47715e-07	4.28857e-06	18035	Nfkbia
04064	NF-kappa B signaling pathway	10.1905	2.47715e-07	4.28857e-06	16176	Il1b
04064	NF-kappa B signaling pathway	10.1905	2.47715e-07	4.28857e-06	23882	Gadd45g
04064	NF-kappa B signaling pathway	10.1905	2.47715e-07	4.28857e-06	17873	Gadd45b
04064	NF-kappa B signaling pathway	10.1905	2.47715e-07	4.28857e-06	20303	Ccl4
04064	NF-kappa B signaling pathway	10.1905	2.47715e-07	4.28857e-06	20310	Cxcl2
04064	NF-kappa B signaling pathway	10.1905	2.47715e-07	4.28857e-06	11798	Xiap
04064	NF-kappa B signaling pathway	10.1905	2.47715e-07	4.28857e-06	21929	Tnfaip3
04723	Retrograde endocannabinoid signaling	7.9527	7.05334e-07	1.11729e-05	69875	Ndufa11
04723	Retrograde endocannabinoid signaling	7.9527	7.05334e-07	1.11729e-05	12289	Cacna1d
04723	Retrograde endocannabinoid signaling	7.9527	7.05334e-07	1.11729e-05	19225	Ptgs2
04723	Retrograde endocannabinoid signaling	7.9527	7.05334e-07	1.11729e-05	14400	Gabrb1
04723	Retrograde endocannabinoid signaling	7.9527	7.05334e-07	1.11729e-05	17991	Ndufa2
04723	Retrograde endocannabinoid signaling	7.9527	7.05334e-07	1.11729e-05	66416	Ndufa7
04723	Retrograde endocannabinoid signaling	7.9527	7.05334e-07	1.11729e-05	54405	Ndufa1
04723	Retrograde endocannabinoid signaling	7.9527	7.05334e-07	1.11729e-05	17992	Ndufa4
04723	Retrograde endocannabinoid signaling	7.9527	7.05334e-07	1.11729e-05	67130	Ndufa6
04723	Retrograde endocannabinoid signaling	7.9527	7.05334e-07	1.11729e-05	595136	Ndufs5
04723	Retrograde endocannabinoid signaling	7.9527	7.05334e-07	1.11729e-05	230075	Ndufb6
03013	RNA transport	7.05495	7.26034e-07	1.11729e-05	21681	Alyref
03013	RNA transport	7.05495	7.26034e-07	1.11729e-05	74097	Pop7
03013	RNA transport	7.05495	7.26034e-07	1.11729e-05	170930	Sumo2
03013	RNA transport	7.05495	7.26034e-07	1.11729e-05	233908	Fus
03013	RNA transport	7.05495	7.26034e-07	1.11729e-05	66161	Pop4
03013	RNA transport	7.05495	7.26034e-07	1.11729e-05	20918	Eif1
03013	RNA transport	7.05495	7.26034e-07	1.11729e-05	114671	4930444G20Rik
03013	RNA transport	7.05495	7.26034e-07	1.11729e-05	60365	Rbm8a
03013	RNA transport	7.05495	7.26034e-07	1.11729e-05	17149	Magoh
03013	RNA transport	7.05495	7.26034e-07	1.11729e-05	53356	Eif3g
03013	RNA transport	7.05495	7.26034e-07	1.11729e-05	110379	Sec13
03013	RNA transport	7.05495	7.26034e-07	1.11729e-05	68135	Eif3h
04625	C-type lectin receptor signaling pathway	8.59821	4.8231e-06	7.03158e-05	18035	Nfkbia
04625	C-type lectin receptor signaling pathway	8.59821	4.8231e-06	7.03158e-05	19225	Ptgs2
04625	C-type lectin receptor signaling pathway	8.59821	4.8231e-06	7.03158e-05	16176	Il1b
04625	C-type lectin receptor signaling pathway	8.59821	4.8231e-06	7.03158e-05	216799	Nlrp3
04625	C-type lectin receptor signaling pathway	8.59821	4.8231e-06	7.03158e-05	16153	Il10
04625	C-type lectin receptor signaling pathway	8.59821	4.8231e-06	7.03158e-05	332579	Card9
04625	C-type lectin receptor signaling pathway	8.59821	4.8231e-06	7.03158e-05	66824	Pycard
04625	C-type lectin receptor signaling pathway	8.59821	4.8231e-06	7.03158e-05	16160	Il12b
04625	C-type lectin receptor signaling pathway	8.59821	4.8231e-06	7.03158e-05	13654	Egr2
04657	IL-17 signaling pathway	9.40659	9.60738e-06	0.000133062	21929	Tnfaip3
04657	IL-17 signaling pathway	9.40659	9.60738e-06	0.000133062	16478	Jund
04657	IL-17 signaling pathway	9.40659	9.60738e-06	0.000133062	16176	Il1b
04657	IL-17 signaling pathway	9.40659	9.60738e-06	0.000133062	14281	Fos
04657	IL-17 signaling pathway	9.40659	9.60738e-06	0.000133062	19225	Ptgs2
04657	IL-17 signaling pathway	9.40659	9.60738e-06	0.000133062	20310	Cxcl2
04657	IL-17 signaling pathway	9.40659	9.60738e-06	0.000133062	18035	Nfkbia
04657	IL-17 signaling pathway	9.40659	9.60738e-06	0.000133062	12608	Cebpb
04380	Osteoclast differentiation	7.52344	1.46608e-05	0.000193383	14728	Lilrb4a
04380	Osteoclast differentiation	7.52344	1.46608e-05	0.000193383	14284	Fosl2
04380	Osteoclast differentiation	7.52344	1.46608e-05	0.000193383	16176	Il1b
04380	Osteoclast differentiation	7.52344	1.46608e-05	0.000193383	14281	Fos
04380	Osteoclast differentiation	7.52344	1.46608e-05	0.000193383	100038947	Sirpb1c
04380	Osteoclast differentiation	7.52344	1.46608e-05	0.000193383	12702	Socs3
04380	Osteoclast differentiation	7.52344	1.46608e-05	0.000193383	16477	Junb
04380	Osteoclast differentiation	7.52344	1.46608e-05	0.000193383	18035	Nfkbia
04380	Osteoclast differentiation	7.52344	1.46608e-05	0.000193383	16478	Jund
04141	Protein processing in endoplasmic reticulum	6.22093	2.34923e-05	0.000290201	109815	Selenos
04141	Protein processing in endoplasmic reticulum	6.22093	2.34923e-05	0.000290201	15512	Hspa2
04141	Protein processing in endoplasmic reticulum	6.22093	2.34923e-05	0.000290201	110379	Sec13
04141	Protein processing in endoplasmic reticulum	6.22093	2.34923e-05	0.000290201	81500	Sil1
04141	Protein processing in endoplasmic reticulum	6.22093	2.34923e-05	0.000290201	66435	Uggt2
04141	Protein processing in endoplasmic reticulum	6.22093	2.34923e-05	0.000290201	27103	Eif2ak4
04141	Protein processing in endoplasmic reticulum	6.22093	2.34923e-05	0.000290201	17872	Ppp1r15a
04141	Protein processing in endoplasmic reticulum	6.22093	2.34923e-05	0.000290201	13198	Ddit3
04141	Protein processing in endoplasmic reticulum	6.22093	2.34923e-05	0.000290201	14828	Hspa5
04141	Protein processing in endoplasmic reticulum	6.22093	2.34923e-05	0.000290201	230815	Man1c1
04210	Apoptosis	7.08088	2.40961e-05	0.000290201	13804	Endog
04210	Apoptosis	7.08088	2.40961e-05	0.000290201	13036	Ctsh
04210	Apoptosis	7.08088	2.40961e-05	0.000290201	17873	Gadd45b
04210	Apoptosis	7.08088	2.40961e-05	0.000290201	18035	Nfkbia
04210	Apoptosis	7.08088	2.40961e-05	0.000290201	13198	Ddit3
04210	Apoptosis	7.08088	2.40961e-05	0.000290201	13197	Gadd45a
04210	Apoptosis	7.08088	2.40961e-05	0.000290201	23882	Gadd45g
04210	Apoptosis	7.08088	2.40961e-05	0.000290201	11798	Xiap
04210	Apoptosis	7.08088	2.40961e-05	0.000290201	14281	Fos
05162	Measles	6.59589	4.2821e-05	0.000494226	18035	Nfkbia
05162	Measles	6.59589	4.2821e-05	0.000494226	14694	Rack1
05162	Measles	6.59589	4.2821e-05	0.000494226	15512	Hspa2
05162	Measles	6.59589	4.2821e-05	0.000494226	16176	Il1b
05162	Measles	6.59589	4.2821e-05	0.000494226	68135	Eif3h
05162	Measles	6.59589	4.2821e-05	0.000494226	14281	Fos
05162	Measles	6.59589	4.2821e-05	0.000494226	16160	Il12b
05162	Measles	6.59589	4.2821e-05	0.000494226	27103	Eif2ak4
05162	Measles	6.59589	4.2821e-05	0.000494226	21929	Tnfaip3
04260	Cardiac muscle contraction	8.6092	7.39195e-05	0.000819028	66694	Uqcrfs1
04260	Cardiac muscle contraction	8.6092	7.39195e-05	0.000819028	84682	Cox4i2
04260	Cardiac muscle contraction	8.6092	7.39195e-05	0.000819028	66445	Cyc1
04260	Cardiac muscle contraction	8.6092	7.39195e-05	0.000819028	22272	Uqcrq
04260	Cardiac muscle contraction	8.6092	7.39195e-05	0.000819028	12861	Cox6a1
04260	Cardiac muscle contraction	8.6092	7.39195e-05	0.000819028	12289	Cacna1d
04260	Cardiac muscle contraction	8.6092	7.39195e-05	0.000819028	12857	Cox4i1
05134	Legionellosis	10.5246	9.35752e-05	0.000996936	66824	Pycard
05134	Legionellosis	10.5246	9.35752e-05	0.000996936	18035	Nfkbia
05134	Legionellosis	10.5246	9.35752e-05	0.000996936	15512	Hspa2
05134	Legionellosis	10.5246	9.35752e-05	0.000996936	16176	Il1b
05134	Legionellosis	10.5246	9.35752e-05	0.000996936	20310	Cxcl2
05134	Legionellosis	10.5246	9.35752e-05	0.000996936	16160	Il12b
01212	Fatty acid metabolism	10.3548	0.000102786	0.00105451	328845	Acsbg2
01212	Fatty acid metabolism	10.3548	0.000102786	0.00105451	12894	Cpt1a
01212	Fatty acid metabolism	10.3548	0.000102786	0.00105451	11370	Acadvl
01212	Fatty acid metabolism	10.3548	0.000102786	0.00105451	52538	Acaa2
01212	Fatty acid metabolism	10.3548	0.000102786	0.00105451	257633	Acsf3
01212	Fatty acid metabolism	10.3548	0.000102786	0.00105451	14979	H2-Ke6
05222	Small cell lung cancer	8.05376	0.000114197	0.00112973	13197	Gadd45a
05222	Small cell lung cancer	8.05376	0.000114197	0.00112973	19225	Ptgs2
05222	Small cell lung cancer	8.05376	0.000114197	0.00112973	17873	Gadd45b
05222	Small cell lung cancer	8.05376	0.000114197	0.00112973	18035	Nfkbia
05222	Small cell lung cancer	8.05376	0.000114197	0.00112973	23882	Gadd45g
05222	Small cell lung cancer	8.05376	0.000114197	0.00112973	11798	Xiap
05222	Small cell lung cancer	8.05376	0.000114197	0.00112973	54124	Cks1b
05140	Leishmaniasis	9.17143	0.000205808	0.00196582	16176	Il1b
05140	Leishmaniasis	9.17143	0.000205808	0.00196582	16153	Il10
05140	Leishmaniasis	9.17143	0.000205808	0.00196582	14281	Fos
05140	Leishmaniasis	9.17143	0.000205808	0.00196582	19225	Ptgs2
05140	Leishmaniasis	9.17143	0.000205808	0.00196582	18035	Nfkbia
05140	Leishmaniasis	9.17143	0.000205808	0.00196582	16160	Il12b
05202	Transcriptional misregulation in cancer	4.79821	0.000219612	0.00201769	13198	Ddit3
05202	Transcriptional misregulation in cancer	4.79821	0.000219612	0.00201769	233908	Fus
05202	Transcriptional misregulation in cancer	4.79821	0.000219612	0.00201769	15902	Id2
05202	Transcriptional misregulation in cancer	4.79821	0.000219612	0.00201769	13197	Gadd45a
05202	Transcriptional misregulation in cancer	4.79821	0.000219612	0.00201769	12608	Cebpb
05202	Transcriptional misregulation in cancer	4.79821	0.000219612	0.00201769	17873	Gadd45b
05202	Transcriptional misregulation in cancer	4.79821	0.000219612	0.00201769	18124	Nr4a3
05202	Transcriptional misregulation in cancer	4.79821	0.000219612	0.00201769	15081	H3f3b
05202	Transcriptional misregulation in cancer	4.79821	0.000219612	0.00201769	23882	Gadd45g
05202	Transcriptional misregulation in cancer	4.79821	0.000219612	0.00201769	16178	Il1r2
03022	Basal transcription factors	12.1591	0.000225807	0.00201769	68705	Gtf2f2
03022	Basal transcription factors	12.1591	0.000225807	0.00201769	68776	Taf11
03022	Basal transcription factors	12.1591	0.000225807	0.00201769	99730	Taf13
03022	Basal transcription factors	12.1591	0.000225807	0.00201769	72504	Taf4b
03022	Basal transcription factors	12.1591	0.000225807	0.00201769	17420	Mnat1
05200	Pathways in cancer	3.15285	0.0002704	0.00234065	54124	Cks1b
05200	Pathways in cancer	3.15285	0.0002704	0.00234065	19225	Ptgs2
05200	Pathways in cancer	3.15285	0.0002704	0.00234065	16160	Il12b
05200	Pathways in cancer	3.15285	0.0002704	0.00234065	13197	Gadd45a
05200	Pathways in cancer	3.15285	0.0002704	0.00234065	22340	Vegfb
05200	Pathways in cancer	3.15285	0.0002704	0.00234065	17873	Gadd45b
05200	Pathways in cancer	3.15285	0.0002704	0.00234065	13614	Edn1
05200	Pathways in cancer	3.15285	0.0002704	0.00234065	11798	Xiap
05200	Pathways in cancer	3.15285	0.0002704	0.00234065	14171	Fgf17
05200	Pathways in cancer	3.15285	0.0002704	0.00234065	18712	Pim1
05200	Pathways in cancer	3.15285	0.0002704	0.00234065	18035	Nfkbia
05200	Pathways in cancer	3.15285	0.0002704	0.00234065	23882	Gadd45g
05200	Pathways in cancer	3.15285	0.0002704	0.00234065	212398	Frat2
05200	Pathways in cancer	3.15285	0.0002704	0.00234065	14281	Fos
05200	Pathways in cancer	3.15285	0.0002704	0.00234065	19730	Ralgds
05200	Pathways in cancer	3.15285	0.0002704	0.00234065	64654	Fgf23
05146	Amoebiasis	7	0.000280895	0.00235781	226421	Rab7b
05146	Amoebiasis	7	0.000280895	0.00235781	16176	Il1b
05146	Amoebiasis	7	0.000280895	0.00235781	14680	Gnal
05146	Amoebiasis	7	0.000280895	0.00235781	16160	Il12b
05146	Amoebiasis	7	0.000280895	0.00235781	16153	Il10
05146	Amoebiasis	7	0.000280895	0.00235781	20310	Cxcl2
05146	Amoebiasis	7	0.000280895	0.00235781	16178	Il1r2
04928	Parathyroid hormone synthesis, secretion and action	6.93519	0.000297962	0.00240681	13653	Egr1
04928	Parathyroid hormone synthesis, secretion and action	6.93519	0.000297962	0.00240681	78284	Creb3l4
04928	Parathyroid hormone synthesis, secretion and action	6.93519	0.000297962	0.00240681	18227	Nr4a2
04928	Parathyroid hormone synthesis, secretion and action	6.93519	0.000297962	0.00240681	16478	Jund
04928	Parathyroid hormone synthesis, secretion and action	6.93519	0.000297962	0.00240681	14281	Fos
04928	Parathyroid hormone synthesis, secretion and action	6.93519	0.000297962	0.00240681	17938	Naca
04928	Parathyroid hormone synthesis, secretion and action	6.93519	0.000297962	0.00240681	64654	Fgf23
05418	Fluid shear stress and atherosclerosis	5.86301	0.00030411	0.00240681	20969	Sdc1
05418	Fluid shear stress and atherosclerosis	5.86301	0.00030411	0.00240681	170930	Sumo2
05418	Fluid shear stress and atherosclerosis	5.86301	0.00030411	0.00240681	14281	Fos
05418	Fluid shear stress and atherosclerosis	5.86301	0.00030411	0.00240681	16178	Il1r2
05418	Fluid shear stress and atherosclerosis	5.86301	0.00030411	0.00240681	13614	Edn1
05418	Fluid shear stress and atherosclerosis	5.86301	0.00030411	0.00240681	19252	Dusp1
05418	Fluid shear stress and atherosclerosis	5.86301	0.00030411	0.00240681	16176	Il1b
05418	Fluid shear stress and atherosclerosis	5.86301	0.00030411	0.00240681	21824	Thbd
04931	Insulin resistance	6.80909	0.000334638	0.00257485	58805	Mlxipl
04931	Insulin resistance	6.80909	0.000334638	0.00257485	12894	Cpt1a
04931	Insulin resistance	6.80909	0.000334638	0.00257485	384783	Irs2
04931	Insulin resistance	6.80909	0.000334638	0.00257485	18035	Nfkbia
04931	Insulin resistance	6.80909	0.000334638	0.00257485	12702	Socs3
04931	Insulin resistance	6.80909	0.000334638	0.00257485	78284	Creb3l4
04931	Insulin resistance	6.80909	0.000334638	0.00257485	19309	Pygm
05133	Pertussis	8.33766	0.000352173	0.00263654	14281	Fos
05133	Pertussis	8.33766	0.000352173	0.00263654	16160	Il12b
05133	Pertussis	8.33766	0.000352173	0.00263654	16153	Il10
05133	Pertussis	8.33766	0.000352173	0.00263654	216799	Nlrp3
05133	Pertussis	8.33766	0.000352173	0.00263654	66824	Pycard
05133	Pertussis	8.33766	0.000352173	0.00263654	16176	Il1b
01240	Biosynthesis of cofactors?New!	5.55844	0.000441183	0.00321599	102216272	Ak6
01240	Biosynthesis of cofactors?New!	5.55844	0.000441183	0.00321599	11647	Alpl
01240	Biosynthesis of cofactors?New!	5.55844	0.000441183	0.00321599	18103	Nme2
01240	Biosynthesis of cofactors?New!	5.55844	0.000441183	0.00321599	394432	Ugt1a7c
01240	Biosynthesis of cofactors?New!	5.55844	0.000441183	0.00321599	74080	Nmnat3
01240	Biosynthesis of cofactors?New!	5.55844	0.000441183	0.00321599	229949	Ak5
01240	Biosynthesis of cofactors?New!	5.55844	0.000441183	0.00321599	11565	Adssl1
01240	Biosynthesis of cofactors?New!	5.55844	0.000441183	0.00321599	18102	Nme1
04935	Growth hormone synthesis, secretion and action	6.4569	0.000467306	0.00331907	14599	Gh
04935	Growth hormone synthesis, secretion and action	6.4569	0.000467306	0.00331907	384783	Irs2
04935	Growth hormone synthesis, secretion and action	6.4569	0.000467306	0.00331907	16477	Junb
04935	Growth hormone synthesis, secretion and action	6.4569	0.000467306	0.00331907	12702	Socs3
04935	Growth hormone synthesis, secretion and action	6.4569	0.000467306	0.00331907	14281	Fos
04935	Growth hormone synthesis, secretion and action	6.4569	0.000467306	0.00331907	12289	Cacna1d
04935	Growth hormone synthesis, secretion and action	6.4569	0.000467306	0.00331907	78284	Creb3l4
00280	Valine, leucine and isoleucine degradation	9.38596	0.000787826	0.00545569	52538	Acaa2
00280	Valine, leucine and isoleucine degradation	9.38596	0.000787826	0.00545569	12040	Bckdhb
00280	Valine, leucine and isoleucine degradation	9.38596	0.000787826	0.00545569	257633	Acsf3
00280	Valine, leucine and isoleucine degradation	9.38596	0.000787826	0.00545569	66904	Pccb
00280	Valine, leucine and isoleucine degradation	9.38596	0.000787826	0.00545569	78038	Mccc2
04068	FoxO signaling pathway	5.71756	0.000991919	0.0067015	17873	Gadd45b
04068	FoxO signaling pathway	5.71756	0.000991919	0.0067015	13197	Gadd45a
04068	FoxO signaling pathway	5.71756	0.000991919	0.0067015	384783	Irs2
04068	FoxO signaling pathway	5.71756	0.000991919	0.0067015	20620	Plk2
04068	FoxO signaling pathway	5.71756	0.000991919	0.0067015	329934	Foxo6
04068	FoxO signaling pathway	5.71756	0.000991919	0.0067015	23882	Gadd45g
04068	FoxO signaling pathway	5.71756	0.000991919	0.0067015	16153	Il10
00230	Purine metabolism	5.50735	0.00124634	0.00813637	102216272	Ak6
00230	Purine metabolism	5.50735	0.00124634	0.00813637	14923	Guk1
00230	Purine metabolism	5.50735	0.00124634	0.00813637	229949	Ak5
00230	Purine metabolism	5.50735	0.00124634	0.00813637	18103	Nme2
00230	Purine metabolism	5.50735	0.00124634	0.00813637	11565	Adssl1
00230	Purine metabolism	5.50735	0.00124634	0.00813637	18102	Nme1
00230	Purine metabolism	5.50735	0.00124634	0.00813637	68695	Hddc3
04623	Cytosolic DNA-sensing pathway	8.49206	0.00126305	0.00813637	20303	Ccl4
04623	Cytosolic DNA-sensing pathway	8.49206	0.00126305	0.00813637	17749	Polr2k
04623	Cytosolic DNA-sensing pathway	8.49206	0.00126305	0.00813637	66824	Pycard
04623	Cytosolic DNA-sensing pathway	8.49206	0.00126305	0.00813637	16176	Il1b
04623	Cytosolic DNA-sensing pathway	8.49206	0.00126305	0.00813637	18035	Nfkbia
04933	AGE-RAGE signaling pathway in diabetic complications	6.35644	0.00155873	0.00966075	13614	Edn1
04933	AGE-RAGE signaling pathway in diabetic complications	6.35644	0.00155873	0.00966075	16176	Il1b
04933	AGE-RAGE signaling pathway in diabetic complications	6.35644	0.00155873	0.00966075	22340	Vegfb
04933	AGE-RAGE signaling pathway in diabetic complications	6.35644	0.00155873	0.00966075	21824	Thbd
04933	AGE-RAGE signaling pathway in diabetic complications	6.35644	0.00155873	0.00966075	13653	Egr1
04933	AGE-RAGE signaling pathway in diabetic complications	6.35644	0.00155873	0.00966075	18712	Pim1
04137	Mitophagy - animal	8.10606	0.00156944	0.00966075	78294	Rps27a
04137	Mitophagy - animal	8.10606	0.00156944	0.00966075	22187	Ubb
04137	Mitophagy - animal	8.10606	0.00156944	0.00966075	66169	Tomm7
04137	Mitophagy - animal	8.10606	0.00156944	0.00966075	226421	Rab7b
04137	Mitophagy - animal	8.10606	0.00156944	0.00966075	22190	Ubc
03015	mRNA surveillance pathway	6.29412	0.00164321	0.00989497	17690	Msi1
03015	mRNA surveillance pathway	6.29412	0.00164321	0.00989497	21681	Alyref
03015	mRNA surveillance pathway	6.29412	0.00164321	0.00989497	68991	Ssu72
03015	mRNA surveillance pathway	6.29412	0.00164321	0.00989497	17149	Magoh
03015	mRNA surveillance pathway	6.29412	0.00164321	0.00989497	233908	Fus
03015	mRNA surveillance pathway	6.29412	0.00164321	0.00989497	60365	Rbm8a
05142	Chagas disease	6.23301	0.00173122	0.0102031	14281	Fos
05142	Chagas disease	6.23301	0.00173122	0.0102031	16160	Il12b
05142	Chagas disease	6.23301	0.00173122	0.0102031	16153	Il10
05142	Chagas disease	6.23301	0.00173122	0.0102031	18035	Nfkbia
05142	Chagas disease	6.23301	0.00173122	0.0102031	14680	Gnal
05142	Chagas disease	6.23301	0.00173122	0.0102031	16176	Il1b
05224	Breast cancer	5.09524	0.00199122	0.011491	212398	Frat2
05224	Breast cancer	5.09524	0.00199122	0.011491	64654	Fgf23
05224	Breast cancer	5.09524	0.00199122	0.011491	14281	Fos
05224	Breast cancer	5.09524	0.00199122	0.011491	23882	Gadd45g
05224	Breast cancer	5.09524	0.00199122	0.011491	14171	Fgf17
05224	Breast cancer	5.09524	0.00199122	0.011491	17873	Gadd45b
05224	Breast cancer	5.09524	0.00199122	0.011491	13197	Gadd45a
04920	Adipocytokine signaling pathway	7.53521	0.00220062	0.0124403	384783	Irs2
04920	Adipocytokine signaling pathway	7.53521	0.00220062	0.0124403	12894	Cpt1a
04920	Adipocytokine signaling pathway	7.53521	0.00220062	0.0124403	328845	Acsbg2
04920	Adipocytokine signaling pathway	7.53521	0.00220062	0.0124403	12702	Socs3
04920	Adipocytokine signaling pathway	7.53521	0.00220062	0.0124403	18035	Nfkbia
05218	Melanoma	7.43056	0.00234684	0.0127924	23882	Gadd45g
05218	Melanoma	7.43056	0.00234684	0.0127924	17873	Gadd45b
05218	Melanoma	7.43056	0.00234684	0.0127924	14171	Fgf17
05218	Melanoma	7.43056	0.00234684	0.0127924	64654	Fgf23
05218	Melanoma	7.43056	0.00234684	0.0127924	13197	Gadd45a
05166	Human T-cell leukemia virus 1 infection	3.89879	0.00235527	0.0127924	12257	Tspo
05166	Human T-cell leukemia virus 1 infection	3.89879	0.00235527	0.0127924	16178	Il1r2
05166	Human T-cell leukemia virus 1 infection	3.89879	0.00235527	0.0127924	18035	Nfkbia
05166	Human T-cell leukemia virus 1 infection	3.89879	0.00235527	0.0127924	13653	Egr1
05166	Human T-cell leukemia virus 1 infection	3.89879	0.00235527	0.0127924	11798	Xiap
05166	Human T-cell leukemia virus 1 infection	3.89879	0.00235527	0.0127924	78284	Creb3l4
05166	Human T-cell leukemia virus 1 infection	3.89879	0.00235527	0.0127924	13654	Egr2
05166	Human T-cell leukemia virus 1 infection	3.89879	0.00235527	0.0127924	14281	Fos
05166	Human T-cell leukemia virus 1 infection	3.89879	0.00235527	0.0127924	23872	Ets2
05132	Salmonella infection	3.80632	0.00279334	0.0147248	27050	Rps3
05132	Salmonella infection	3.80632	0.00279334	0.0147248	14281	Fos
05132	Salmonella infection	3.80632	0.00279334	0.0147248	226421	Rab7b
05132	Salmonella infection	3.80632	0.00279334	0.0147248	16176	Il1b
05132	Salmonella infection	3.80632	0.00279334	0.0147248	216799	Nlrp3
05132	Salmonella infection	3.80632	0.00279334	0.0147248	66824	Pycard
05132	Salmonella infection	3.80632	0.00279334	0.0147248	18035	Nfkbia
05132	Salmonella infection	3.80632	0.00279334	0.0147248	69654	Dctn2
05132	Salmonella infection	3.80632	0.00279334	0.0147248	213575	Dync2li1
00061	Fatty acid biosynthesis	16.8947	0.00281738	0.0147248	328845	Acsbg2
00061	Fatty acid biosynthesis	16.8947	0.00281738	0.0147248	257633	Acsf3
00061	Fatty acid biosynthesis	16.8947	0.00281738	0.0147248	14979	H2-Ke6
04621	NOD-like receptor signaling pathway	4.05687	0.00363329	0.0186374	16176	Il1b
04621	NOD-like receptor signaling pathway	4.05687	0.00363329	0.0186374	20310	Cxcl2
04621	NOD-like receptor signaling pathway	4.05687	0.00363329	0.0186374	332579	Card9
04621	NOD-like receptor signaling pathway	4.05687	0.00363329	0.0186374	18035	Nfkbia
04621	NOD-like receptor signaling pathway	4.05687	0.00363329	0.0186374	21929	Tnfaip3
04621	NOD-like receptor signaling pathway	4.05687	0.00363329	0.0186374	66824	Pycard
04621	NOD-like receptor signaling pathway	4.05687	0.00363329	0.0186374	216799	Nlrp3
04621	NOD-like receptor signaling pathway	4.05687	0.00363329	0.0186374	11798	Xiap
03050	Proteasome	9.10638	0.00392302	0.0197577	73902	Psmb11
03050	Proteasome	9.10638	0.00392302	0.0197577	19172	Psmb4
03050	Proteasome	9.10638	0.00392302	0.0197577	26444	Psma7
03050	Proteasome	9.10638	0.00392302	0.0197577	19185	Psmd4
04930	Type II diabetes mellitus	8.91667	0.00424827	0.0210138	384783	Irs2
04930	Type II diabetes mellitus	8.91667	0.00424827	0.0210138	12289	Cacna1d
04930	Type II diabetes mellitus	8.91667	0.00424827	0.0210138	216019	Hkdc1
04930	Type II diabetes mellitus	8.91667	0.00424827	0.0210138	12702	Socs3
04979	Cholesterol metabolism	8.73469	0.00459198	0.0223154	11813	Apoc2
04979	Cholesterol metabolism	8.73469	0.00459198	0.0223154	57875	Angptl4
04979	Cholesterol metabolism	8.73469	0.00459198	0.0223154	12257	Tspo
04979	Cholesterol metabolism	8.73469	0.00459198	0.0223154	16976	Lrpap1
03018	RNA degradation	6.36905	0.00472489	0.0225654	66373	Lsm5
03018	RNA degradation	6.36905	0.00472489	0.0225654	66094	Lsm7
03018	RNA degradation	6.36905	0.00472489	0.0225654	50783	Lsm4
03018	RNA degradation	6.36905	0.00472489	0.0225654	13808	Eno3
03018	RNA degradation	6.36905	0.00472489	0.0225654	74108	Parn
00600	Sphingolipid metabolism	8.56	0.0049547	0.0232619	223753	Cerk
00600	Sphingolipid metabolism	8.56	0.0049547	0.0232619	77626	Smpd4
00600	Sphingolipid metabolism	8.56	0.0049547	0.0232619	74442	Sgms2
00600	Sphingolipid metabolism	8.56	0.0049547	0.0232619	11605	Gla
04926	Relaxin signaling pathway	4.97674	0.00561941	0.025943	78284	Creb3l4
04926	Relaxin signaling pathway	4.97674	0.00561941	0.025943	18035	Nfkbia
04926	Relaxin signaling pathway	4.97674	0.00561941	0.025943	14281	Fos
04926	Relaxin signaling pathway	4.97674	0.00561941	0.025943	13614	Edn1
04926	Relaxin signaling pathway	4.97674	0.00561941	0.025943	11475	Acta2
04926	Relaxin signaling pathway	4.97674	0.00561941	0.025943	22340	Vegfb
00071	Fatty acid degradation	8.23077	0.0057394	0.0259833	328845	Acsbg2
00071	Fatty acid degradation	8.23077	0.0057394	0.0259833	12894	Cpt1a
00071	Fatty acid degradation	8.23077	0.0057394	0.0259833	11370	Acadvl
00071	Fatty acid degradation	8.23077	0.0057394	0.0259833	52538	Acaa2
05210	Colorectal cancer	6.07955	0.00581576	0.0259833	19730	Ralgds
05210	Colorectal cancer	6.07955	0.00581576	0.0259833	14281	Fos
05210	Colorectal cancer	6.07955	0.00581576	0.0259833	13197	Gadd45a
05210	Colorectal cancer	6.07955	0.00581576	0.0259833	17873	Gadd45b
05210	Colorectal cancer	6.07955	0.00581576	0.0259833	23882	Gadd45g
05135	Yersinia infection	4.79104	0.00681994	0.0299861	66824	Pycard
05135	Yersinia infection	4.79104	0.00681994	0.0299861	16176	Il1b
05135	Yersinia infection	4.79104	0.00681994	0.0299861	16153	Il10
05135	Yersinia infection	4.79104	0.00681994	0.0299861	14281	Fos
05135	Yersinia infection	4.79104	0.00681994	0.0299861	216799	Nlrp3
05135	Yersinia infection	4.79104	0.00681994	0.0299861	18035	Nfkbia
04060	Cytokine-cytokine receptor interaction	3.28669	0.00770994	0.0333696	16153	Il10
04060	Cytokine-cytokine receptor interaction	3.28669	0.00770994	0.0333696	16963	Xcl1
04060	Cytokine-cytokine receptor interaction	3.28669	0.00770994	0.0333696	12154	Bmp10
04060	Cytokine-cytokine receptor interaction	3.28669	0.00770994	0.0333696	16178	Il1r2
04060	Cytokine-cytokine receptor interaction	3.28669	0.00770994	0.0333696	20310	Cxcl2
04060	Cytokine-cytokine receptor interaction	3.28669	0.00770994	0.0333696	16176	Il1b
04060	Cytokine-cytokine receptor interaction	3.28669	0.00770994	0.0333696	20303	Ccl4
04060	Cytokine-cytokine receptor interaction	3.28669	0.00770994	0.0333696	16160	Il12b
04060	Cytokine-cytokine receptor interaction	3.28669	0.00770994	0.0333696	14599	Gh
04120	Ubiquitin mediated proteolysis	4.42759	0.0101377	0.0428168	11798	Xiap
04120	Ubiquitin mediated proteolysis	4.42759	0.0101377	0.0428168	22187	Ubb
04120	Ubiquitin mediated proteolysis	4.42759	0.0101377	0.0428168	22190	Ubc
04120	Ubiquitin mediated proteolysis	4.42759	0.0101377	0.0428168	80794	Cblc
04120	Ubiquitin mediated proteolysis	4.42759	0.0101377	0.0428168	12702	Socs3
04120	Ubiquitin mediated proteolysis	4.42759	0.0101377	0.0428168	78294	Rps27a
04620	Toll-like receptor signaling pathway	5.35	0.0102018	0.0428168	14281	Fos
04620	Toll-like receptor signaling pathway	5.35	0.0102018	0.0428168	16160	Il12b
04620	Toll-like receptor signaling pathway	5.35	0.0102018	0.0428168	18035	Nfkbia
04620	Toll-like receptor signaling pathway	5.35	0.0102018	0.0428168	20303	Ccl4
04620	Toll-like receptor signaling pathway	5.35	0.0102018	0.0428168	16176	Il1b
05226	Gastric cancer	4.28	0.0119931	0.0495832	14171	Fgf17
05226	Gastric cancer	4.28	0.0119931	0.0495832	23882	Gadd45g
05226	Gastric cancer	4.28	0.0119931	0.0495832	64654	Fgf23
05226	Gastric cancer	4.28	0.0119931	0.0495832	212398	Frat2
05226	Gastric cancer	4.28	0.0119931	0.0495832	13197	Gadd45a
05226	Gastric cancer	4.28	0.0119931	0.0495832	17873	Gadd45b
00052	Galactose metabolism	10.0312	0.0131786	0.0536835	216019	Hkdc1
00052	Galactose metabolism	10.0312	0.0131786	0.0536835	14635	Galk1
00052	Galactose metabolism	10.0312	0.0131786	0.0536835	11605	Gla
05145	Toxoplasmosis	4.86364	0.0153734	0.0617165	16160	Il12b
05145	Toxoplasmosis	4.86364	0.0153734	0.0617165	15512	Hspa2
05145	Toxoplasmosis	4.86364	0.0153734	0.0617165	11798	Xiap
05145	Toxoplasmosis	4.86364	0.0153734	0.0617165	16153	Il10
05145	Toxoplasmosis	4.86364	0.0153734	0.0617165	18035	Nfkbia
03410	Base excision repair	9.44118	0.0156813	0.0620531	268395	Mpg
03410	Base excision repair	9.44118	0.0156813	0.0620531	72774	Neil1
03410	Base excision repair	9.44118	0.0156813	0.0620531	14156	Fen1
05031	Amphetamine addiction	6.2029	0.0161806	0.0631271	78284	Creb3l4
05031	Amphetamine addiction	6.2029	0.0161806	0.0631271	14281	Fos
05031	Amphetamine addiction	6.2029	0.0161806	0.0631271	11838	Arc
05031	Amphetamine addiction	6.2029	0.0161806	0.0631271	12289	Cacna1d
05216	Thyroid cancer	8.67568	0.0199445	0.0767311	17873	Gadd45b
05216	Thyroid cancer	8.67568	0.0199445	0.0767311	23882	Gadd45g
05216	Thyroid cancer	8.67568	0.0199445	0.0767311	13197	Gadd45a
05167	Kaposi sarcoma-associated herpesvirus infection	3.32889	0.0222137	0.0832351	22187	Ubb
05167	Kaposi sarcoma-associated herpesvirus infection	3.32889	0.0222137	0.0832351	22190	Ubc
05167	Kaposi sarcoma-associated herpesvirus infection	3.32889	0.0222137	0.0832351	19225	Ptgs2
05167	Kaposi sarcoma-associated herpesvirus infection	3.32889	0.0222137	0.0832351	18035	Nfkbia
05167	Kaposi sarcoma-associated herpesvirus infection	3.32889	0.0222137	0.0832351	14281	Fos
05167	Kaposi sarcoma-associated herpesvirus infection	3.32889	0.0222137	0.0832351	20310	Cxcl2
05167	Kaposi sarcoma-associated herpesvirus infection	3.32889	0.0222137	0.0832351	78294	Rps27a
05212	Pancreatic cancer	5.63158	0.022817	0.0832351	13197	Gadd45a
05212	Pancreatic cancer	5.63158	0.022817	0.0832351	17873	Gadd45b
05212	Pancreatic cancer	5.63158	0.022817	0.0832351	19730	Ralgds
05212	Pancreatic cancer	5.63158	0.022817	0.0832351	23882	Gadd45g
05220	Chronic myeloid leukemia	5.63158	0.022817	0.0832351	18035	Nfkbia
05220	Chronic myeloid leukemia	5.63158	0.022817	0.0832351	17873	Gadd45b
05220	Chronic myeloid leukemia	5.63158	0.022817	0.0832351	13197	Gadd45a
05220	Chronic myeloid leukemia	5.63158	0.022817	0.0832351	23882	Gadd45g
03008	Ribosome biogenesis in eukaryotes	4.42149	0.0229767	0.0832351	102216272	Ak6
03008	Ribosome biogenesis in eukaryotes	4.42149	0.0229767	0.0832351	68147	Gar1
03008	Ribosome biogenesis in eukaryotes	4.42149	0.0229767	0.0832351	217109	Utp18
03008	Ribosome biogenesis in eukaryotes	4.42149	0.0229767	0.0832351	74097	Pop7
03008	Ribosome biogenesis in eukaryotes	4.42149	0.0229767	0.0832351	66161	Pop4
05143	African trypanosomiasis	8.23077	0.0231376	0.0832351	16153	Il10
05143	African trypanosomiasis	8.23077	0.0231376	0.0832351	16160	Il12b
05143	African trypanosomiasis	8.23077	0.0231376	0.0832351	16176	Il1b
05164	Influenza A	3.71098	0.0239394	0.0850157	216799	Nlrp3
05164	Influenza A	3.71098	0.0239394	0.0850157	66824	Pycard
05164	Influenza A	3.71098	0.0239394	0.0850157	16176	Il1b
05164	Influenza A	3.71098	0.0239394	0.0850157	12702	Socs3
05164	Influenza A	3.71098	0.0239394	0.0850157	16160	Il12b
05164	Influenza A	3.71098	0.0239394	0.0850157	18035	Nfkbia
04217	Necroptosis	3.68966	0.0246034	0.0862675	11798	Xiap
04217	Necroptosis	3.68966	0.0246034	0.0862675	21929	Tnfaip3
04217	Necroptosis	3.68966	0.0246034	0.0862675	16176	Il1b
04217	Necroptosis	3.68966	0.0246034	0.0862675	216799	Nlrp3
04217	Necroptosis	3.68966	0.0246034	0.0862675	19309	Pygm
04217	Necroptosis	3.68966	0.0246034	0.0862675	66824	Pycard
05169	Epstein-Barr virus infection	3.24242	0.0255376	0.088424	23882	Gadd45g
05169	Epstein-Barr virus infection	3.24242	0.0255376	0.088424	18035	Nfkbia
05169	Epstein-Barr virus infection	3.24242	0.0255376	0.088424	17873	Gadd45b
05169	Epstein-Barr virus infection	3.24242	0.0255376	0.088424	21929	Tnfaip3
05169	Epstein-Barr virus infection	3.24242	0.0255376	0.088424	12478	Cd19
05169	Epstein-Barr virus infection	3.24242	0.0255376	0.088424	13197	Gadd45a
05169	Epstein-Barr virus infection	3.24242	0.0255376	0.088424	19185	Psmd4
01230	Biosynthesis of amino acids	5.41772	0.0261434	0.0894039	67834	Idh3a
01230	Biosynthesis of amino acids	5.41772	0.0261434	0.0894039	12411	Cbs
01230	Biosynthesis of amino acids	5.41772	0.0261434	0.0894039	13808	Eno3
01230	Biosynthesis of amino acids	5.41772	0.0261434	0.0894039	209027	Pycr1
04080	Neuroactive ligand-receptor interaction	2.68994	0.0282908	0.095207	14400	Gabrb1
04080	Neuroactive ligand-receptor interaction	2.68994	0.0282908	0.095207	14599	Gh
04080	Neuroactive ligand-receptor interaction	2.68994	0.0282908	0.095207	14815	Nr3c1
04080	Neuroactive ligand-receptor interaction	2.68994	0.0282908	0.095207	78826	P2ry10
04080	Neuroactive ligand-receptor interaction	2.68994	0.0282908	0.095207	93670	Tac4
04080	Neuroactive ligand-receptor interaction	2.68994	0.0282908	0.095207	12257	Tspo
04080	Neuroactive ligand-receptor interaction	2.68994	0.0282908	0.095207	12671	Chrm3
04080	Neuroactive ligand-receptor interaction	2.68994	0.0282908	0.095207	13614	Edn1
04080	Neuroactive ligand-receptor interaction	2.68994	0.0282908	0.095207	110312	Pmch
04662	B cell receptor signaling pathway	5.28395	0.0285305	0.095207	18035	Nfkbia
04662	B cell receptor signaling pathway	5.28395	0.0285305	0.095207	14281	Fos
04662	B cell receptor signaling pathway	5.28395	0.0285305	0.095207	14728	Lilrb4a
04662	B cell receptor signaling pathway	5.28395	0.0285305	0.095207	12478	Cd19
05152	Tuberculosis	3.56667	0.0288714	0.095207	16160	Il12b
05152	Tuberculosis	3.56667	0.0288714	0.095207	16153	Il10
05152	Tuberculosis	3.56667	0.0288714	0.095207	12608	Cebpb
05152	Tuberculosis	3.56667	0.0288714	0.095207	12721	Coro1a
05152	Tuberculosis	3.56667	0.0288714	0.095207	332579	Card9
05152	Tuberculosis	3.56667	0.0288714	0.095207	16176	Il1b
04962	Vasopressin-regulated water reabsorption	7.29545	0.0323969	0.105576	78284	Creb3l4
04962	Vasopressin-regulated water reabsorption	7.29545	0.0323969	0.105576	69654	Dctn2
04962	Vasopressin-regulated water reabsorption	7.29545	0.0323969	0.105576	213575	Dync2li1
00730	Thiamine metabolism	14.2667	0.0337934	0.108846	11647	Alpl
00730	Thiamine metabolism	14.2667	0.0337934	0.108846	229949	Ak5
05323	Rheumatoid arthritis	4.91954	0.0365414	0.116345	12477	Ctla4
05323	Rheumatoid arthritis	4.91954	0.0365414	0.116345	14281	Fos
05323	Rheumatoid arthritis	4.91954	0.0365414	0.116345	16176	Il1b
05323	Rheumatoid arthritis	4.91954	0.0365414	0.116345	20310	Cxcl2
03320	PPAR signaling pathway	4.80899	0.0395052	0.124352	328845	Acsbg2
03320	PPAR signaling pathway	4.80899	0.0395052	0.124352	57875	Angptl4
03320	PPAR signaling pathway	4.80899	0.0395052	0.124352	12894	Cpt1a
03320	PPAR signaling pathway	4.80899	0.0395052	0.124352	22190	Ubc
00983	Drug metabolism - other enzymes	4.65217	0.044236	0.137678	394432	Ugt1a7c
00983	Drug metabolism - other enzymes	4.65217	0.044236	0.137678	18102	Nme1
00983	Drug metabolism - other enzymes	4.65217	0.044236	0.137678	110074	Dut
00983	Drug metabolism - other enzymes	4.65217	0.044236	0.137678	18103	Nme2
05168	Herpes simplex virus 1 infection	2.33624	0.0474866	0.146153	18035	Nfkbia
05168	Herpes simplex virus 1 infection	2.33624	0.0474866	0.146153	20384	Srsf5
05168	Herpes simplex virus 1 infection	2.33624	0.0474866	0.146153	21681	Alyref
05168	Herpes simplex virus 1 infection	2.33624	0.0474866	0.146153	16176	Il1b
05168	Herpes simplex virus 1 infection	2.33624	0.0474866	0.146153	332579	Card9
05168	Herpes simplex virus 1 infection	2.33624	0.0474866	0.146153	233058	Zfp420
05168	Herpes simplex virus 1 infection	2.33624	0.0474866	0.146153	16160	Il12b
05168	Herpes simplex virus 1 infection	2.33624	0.0474866	0.146153	12702	Socs3
05168	Herpes simplex virus 1 infection	2.33624	0.0474866	0.146153	626802	Gm14322
05168	Herpes simplex virus 1 infection	2.33624	0.0474866	0.146153	27103	Eif2ak4
04061	Viral protein interaction with cytokine and cytokine receptor	4.50526	0.0493171	0.150119	16963	Xcl1
04061	Viral protein interaction with cytokine and cytokine receptor	4.50526	0.0493171	0.150119	20303	Ccl4
04061	Viral protein interaction with cytokine and cytokine receptor	4.50526	0.0493171	0.150119	16153	Il10
04061	Viral protein interaction with cytokine and cytokine receptor	4.50526	0.0493171	0.150119	20310	Cxcl2
04713	Circadian entrainment	4.36735	0.0547568	0.163093	14281	Fos
04713	Circadian entrainment	4.36735	0.0547568	0.163093	19416	Rasd1
04713	Circadian entrainment	4.36735	0.0547568	0.163093	12289	Cacna1d
04713	Circadian entrainment	4.36735	0.0547568	0.163093	18626	Per1
05231	Choline metabolism in cancer	4.36735	0.0547568	0.163093	19730	Ralgds
05231	Choline metabolism in cancer	4.36735	0.0547568	0.163093	12660	Chka
05231	Choline metabolism in cancer	4.36735	0.0547568	0.163093	110197	Dgkg
05231	Choline metabolism in cancer	4.36735	0.0547568	0.163093	14281	Fos
04925	Aldosterone synthesis and secretion	4.19608	0.0625815	0.184416	18227	Nr4a2
04925	Aldosterone synthesis and secretion	4.19608	0.0625815	0.184416	15370	Nr4a1
04925	Aldosterone synthesis and secretion	4.19608	0.0625815	0.184416	78284	Creb3l4
04925	Aldosterone synthesis and secretion	4.19608	0.0625815	0.184416	12289	Cacna1d
04660	T cell receptor signaling pathway	4.15534	0.0646416	0.188481	18035	Nfkbia
04660	T cell receptor signaling pathway	4.15534	0.0646416	0.188481	12477	Ctla4
04660	T cell receptor signaling pathway	4.15534	0.0646416	0.188481	14281	Fos
04660	T cell receptor signaling pathway	4.15534	0.0646416	0.188481	16153	Il10
05144	Malaria	5.63158	0.0654795	0.188936	16176	Il1b
05144	Malaria	5.63158	0.0654795	0.188936	16153	Il10
05144	Malaria	5.63158	0.0654795	0.188936	20969	Sdc1
04922	Glucagon signaling pathway	4.11538	0.0667437	0.190598	78284	Creb3l4
04922	Glucagon signaling pathway	4.11538	0.0667437	0.190598	17691	Sik1
04922	Glucagon signaling pathway	4.11538	0.0667437	0.190598	12894	Cpt1a
04922	Glucagon signaling pathway	4.11538	0.0667437	0.190598	19309	Pygm
00240	Pyrimidine metabolism	5.53448	0.0685817	0.19189	110074	Dut
00240	Pyrimidine metabolism	5.53448	0.0685817	0.19189	18102	Nme1
00240	Pyrimidine metabolism	5.53448	0.0685817	0.19189	18103	Nme2
05213	Endometrial cancer	5.53448	0.0685817	0.19189	17873	Gadd45b
05213	Endometrial cancer	5.53448	0.0685817	0.19189	13197	Gadd45a
05213	Endometrial cancer	5.53448	0.0685817	0.19189	23882	Gadd45g
04310	Wnt signaling pathway	3.30247	0.0742137	0.205572	114671	4930444G20Rik
04310	Wnt signaling pathway	3.30247	0.0742137	0.205572	212398	Frat2
04310	Wnt signaling pathway	3.30247	0.0742137	0.205572	68010	Bambi
04310	Wnt signaling pathway	3.30247	0.0742137	0.205572	207742	Rnf43
04310	Wnt signaling pathway	3.30247	0.0742137	0.205572	234130	Dkk4
05161	Hepatitis B	3.28221	0.0759927	0.208415	14281	Fos
05161	Hepatitis B	3.28221	0.0759927	0.208415	13654	Egr2
05161	Hepatitis B	3.28221	0.0759927	0.208415	18035	Nfkbia
05161	Hepatitis B	3.28221	0.0759927	0.208415	20493	Slc10a1
05161	Hepatitis B	3.28221	0.0759927	0.208415	78284	Creb3l4
00561	Glycerolipid metabolism	5.17742	0.0818002	0.217872	231510	Gpat3
00561	Glycerolipid metabolism	5.17742	0.0818002	0.217872	110197	Dgkg
00561	Glycerolipid metabolism	5.17742	0.0818002	0.217872	11605	Gla
04213	Longevity regulating pathway - multiple species	5.17742	0.0818002	0.217872	20655	Sod1
04213	Longevity regulating pathway - multiple species	5.17742	0.0818002	0.217872	384783	Irs2
04213	Longevity regulating pathway - multiple species	5.17742	0.0818002	0.217872	15512	Hspa2
05321	Inflammatory bowel disease	5.17742	0.0818002	0.217872	16176	Il1b
05321	Inflammatory bowel disease	5.17742	0.0818002	0.217872	16153	Il10
05321	Inflammatory bowel disease	5.17742	0.0818002	0.217872	16160	Il12b
04977	Vitamin digestion and absorption	8.91667	0.084046	0.218799	79235	Lrat
04977	Vitamin digestion and absorption	8.91667	0.084046	0.218799	20522	Slc23a1
04725	Cholinergic synapse	3.82143	0.0851019	0.218799	12671	Chrm3
04725	Cholinergic synapse	3.82143	0.0851019	0.218799	14281	Fos
04725	Cholinergic synapse	3.82143	0.0851019	0.218799	12289	Cacna1d
04725	Cholinergic synapse	3.82143	0.0851019	0.218799	78284	Creb3l4
04913	Ovarian steroidogenesis	5.09524	0.0853077	0.218799	19225	Ptgs2
04913	Ovarian steroidogenesis	5.09524	0.0853077	0.218799	13076	Cyp1a1
04913	Ovarian steroidogenesis	5.09524	0.0853077	0.218799	171210	Acot2
05217	Basal cell carcinoma	5.09524	0.0853077	0.218799	13197	Gadd45a
05217	Basal cell carcinoma	5.09524	0.0853077	0.218799	23882	Gadd45g
05217	Basal cell carcinoma	5.09524	0.0853077	0.218799	17873	Gadd45b
04630	JAK-STAT signaling pathway	3.16568	0.0872554	0.221741	16153	Il10
04630	JAK-STAT signaling pathway	3.16568	0.0872554	0.221741	12702	Socs3
04630	JAK-STAT signaling pathway	3.16568	0.0872554	0.221741	14599	Gh
04630	JAK-STAT signaling pathway	3.16568	0.0872554	0.221741	18712	Pim1
04630	JAK-STAT signaling pathway	3.16568	0.0872554	0.221741	16160	Il12b
04020	Calcium signaling pathway	2.675	0.104559	0.263299	64654	Fgf23
04020	Calcium signaling pathway	2.675	0.104559	0.263299	22340	Vegfb
04020	Calcium signaling pathway	2.675	0.104559	0.263299	14680	Gnal
04020	Calcium signaling pathway	2.675	0.104559	0.263299	12289	Cacna1d
04020	Calcium signaling pathway	2.675	0.104559	0.263299	14171	Fgf17
04020	Calcium signaling pathway	2.675	0.104559	0.263299	12671	Chrm3
00780	Biotin metabolism	35.6667	0.111106	0.277265	110948	Hlcs
04110	Cell cycle	3.47967	0.114949	0.284293	17873	Gadd45b
04110	Cell cycle	3.47967	0.114949	0.284293	13197	Gadd45a
04110	Cell cycle	3.47967	0.114949	0.284293	140557	Smc1b
04110	Cell cycle	3.47967	0.114949	0.284293	23882	Gadd45g
01200	Carbon metabolism	3.45161	0.117932	0.284687	216019	Hkdc1
01200	Carbon metabolism	3.45161	0.117932	0.284687	13808	Eno3
01200	Carbon metabolism	3.45161	0.117932	0.284687	66904	Pccb
01200	Carbon metabolism	3.45161	0.117932	0.284687	67834	Idh3a
00062	Fatty acid elongation	7.37931	0.11991	0.284687	171210	Acot2
00062	Fatty acid elongation	7.37931	0.11991	0.284687	52538	Acaa2
04115	p53 signaling pathway	4.45833	0.120528	0.284687	23882	Gadd45g
04115	p53 signaling pathway	4.45833	0.120528	0.284687	13197	Gadd45a
04115	p53 signaling pathway	4.45833	0.120528	0.284687	17873	Gadd45b
04927	Cortisol synthesis and secretion	4.45833	0.120528	0.284687	12289	Cacna1d
04927	Cortisol synthesis and secretion	4.45833	0.120528	0.284687	78284	Creb3l4
04927	Cortisol synthesis and secretion	4.45833	0.120528	0.284687	15370	Nr4a1
05223	Non-small cell lung cancer	4.45833	0.120528	0.284687	23882	Gadd45g
05223	Non-small cell lung cancer	4.45833	0.120528	0.284687	17873	Gadd45b
05223	Non-small cell lung cancer	4.45833	0.120528	0.284687	13197	Gadd45a
04740	Olfactory transduction	0.366752	0.121275	0.284687	404315	Olfr372
04740	Olfactory transduction	0.366752	0.121275	0.284687	258728	Olfr482
04740	Olfactory transduction	0.366752	0.121275	0.284687	257917	Olfr314
04740	Olfactory transduction	0.366752	0.121275	0.284687	14680	Gnal
04710	Circadian rhythm	7.13333	0.127694	0.297238	18626	Per1
04710	Circadian rhythm	7.13333	0.127694	0.297238	20893	Bhlhe40
05214	Glioma	4.33784	0.129243	0.298337	17873	Gadd45b
05214	Glioma	4.33784	0.129243	0.298337	23882	Gadd45g
05214	Glioma	4.33784	0.129243	0.298337	13197	Gadd45a
04726	Serotonergic synapse	3.26718	0.140096	0.320716	14400	Gabrb1
04726	Serotonergic synapse	3.26718	0.140096	0.320716	19225	Ptgs2
04726	Serotonergic synapse	3.26718	0.140096	0.320716	12289	Cacna1d
04726	Serotonergic synapse	3.26718	0.140096	0.320716	19252	Dusp1
04721	Synaptic vesicle cycle	4.16883	0.142916	0.32449	12890	Cplx2
04721	Synaptic vesicle cycle	4.16883	0.142916	0.32449	235415	Cplx3
04721	Synaptic vesicle cycle	4.16883	0.142916	0.32449	382018	Unc13a
04915	Estrogen signaling pathway	3.19403	0.150284	0.338443	78284	Creb3l4
04915	Estrogen signaling pathway	3.19403	0.150284	0.338443	14281	Fos
04915	Estrogen signaling pathway	3.19403	0.150284	0.338443	16668	Krt18
04915	Estrogen signaling pathway	3.19403	0.150284	0.338443	15512	Hspa2
04130	SNARE interactions in vesicular transport	6.48485	0.152188	0.339969	67023	Use1
04130	SNARE interactions in vesicular transport	6.48485	0.152188	0.339969	55943	Stx8
04728	Dopaminergic synapse	3.17037	0.153771	0.340757	78284	Creb3l4
04728	Dopaminergic synapse	3.17037	0.153771	0.340757	14281	Fos
04728	Dopaminergic synapse	3.17037	0.153771	0.340757	12289	Cacna1d
04728	Dopaminergic synapse	3.17037	0.153771	0.340757	14680	Gnal
00500	Starch and sucrose metabolism	6.29412	0.16072	0.350547	19309	Pygm
00500	Starch and sucrose metabolism	6.29412	0.16072	0.350547	216019	Hkdc1
00640	Propanoate metabolism	6.29412	0.16072	0.350547	12040	Bckdhb
00640	Propanoate metabolism	6.29412	0.16072	0.350547	66904	Pccb
04140	Autophagy - animal	3.10145	0.164511	0.356012	52187	Rragd
04140	Autophagy - animal	3.10145	0.164511	0.356012	384783	Irs2
04140	Autophagy - animal	3.10145	0.164511	0.356012	226421	Rab7b
04140	Autophagy - animal	3.10145	0.164511	0.356012	27103	Eif2ak4
04910	Insulin signaling pathway	3.07914	0.168183	0.358257	384783	Irs2
04910	Insulin signaling pathway	3.07914	0.168183	0.358257	12702	Socs3
04910	Insulin signaling pathway	3.07914	0.168183	0.358257	19309	Pygm
04910	Insulin signaling pathway	3.07914	0.168183	0.358257	216019	Hkdc1
00040	Pentose and glucuronate interconversions	6.11429	0.169428	0.358257	68631	Cryl1
00040	Pentose and glucuronate interconversions	6.11429	0.169428	0.358257	394432	Ugt1a7c
03030	DNA replication	6.11429	0.169428	0.358257	19718	Rfc2
03030	DNA replication	6.11429	0.169428	0.358257	14156	Fen1
04550	Signaling pathways regulating pluripotency of stem cells	3.05714	0.171901	0.360732	22658	Pcgf2
04550	Signaling pathways regulating pluripotency of stem cells	3.05714	0.171901	0.360732	18508	Pax6
04550	Signaling pathways regulating pluripotency of stem cells	3.05714	0.171901	0.360732	15902	Id2
04550	Signaling pathways regulating pluripotency of stem cells	3.05714	0.171901	0.360732	16600	Klf4
05017	Spinocerebellar ataxia	3.03546	0.175666	0.36586	19172	Psmb4
05017	Spinocerebellar ataxia	3.03546	0.175666	0.36586	56543	Kcnd3
05017	Spinocerebellar ataxia	3.03546	0.175666	0.36586	26444	Psma7
05017	Spinocerebellar ataxia	3.03546	0.175666	0.36586	19185	Psmd4
05205	Proteoglycans in cancer	2.60976	0.177339	0.366588	16160	Il12b
05205	Proteoglycans in cancer	2.60976	0.177339	0.366588	20969	Sdc1
05205	Proteoglycans in cancer	2.60976	0.177339	0.366588	18793	Plaur
05205	Proteoglycans in cancer	2.60976	0.177339	0.366588	16147	Ihh
05205	Proteoglycans in cancer	2.60976	0.177339	0.366588	15442	Hpse
00524	Neomycin, kanamycin and gentamicin biosynthesis	21.4	0.18346	0.376432	216019	Hkdc1
04146	Peroxisome	3.73256	0.188184	0.380488	20655	Sod1
04146	Peroxisome	3.73256	0.188184	0.380488	18632	Pex11b
04146	Peroxisome	3.73256	0.188184	0.380488	18634	Pex7
04911	Insulin secretion	3.73256	0.188184	0.380488	12289	Cacna1d
04911	Insulin secretion	3.73256	0.188184	0.380488	12671	Chrm3
04911	Insulin secretion	3.73256	0.188184	0.380488	78284	Creb3l4
04658	Th1 and Th2 cell differentiation	3.64773	0.199091	0.399625	14281	Fos
04658	Th1 and Th2 cell differentiation	3.64773	0.199091	0.399625	18035	Nfkbia
04658	Th1 and Th2 cell differentiation	3.64773	0.199091	0.399625	16160	Il12b
04024	cAMP signaling pathway	2.48837	0.209533	0.417558	18035	Nfkbia
04024	cAMP signaling pathway	2.48837	0.209533	0.417558	13614	Edn1
04024	cAMP signaling pathway	2.48837	0.209533	0.417558	14281	Fos
04024	cAMP signaling pathway	2.48837	0.209533	0.417558	12289	Cacna1d
04024	cAMP signaling pathway	2.48837	0.209533	0.417558	78284	Creb3l4
04151	PI3K-Akt signaling pathway	2.08635	0.213562	0.420337	78284	Creb3l4
04151	PI3K-Akt signaling pathway	2.08635	0.213562	0.420337	14599	Gh
04151	PI3K-Akt signaling pathway	2.08635	0.213562	0.420337	15370	Nr4a1
04151	PI3K-Akt signaling pathway	2.08635	0.213562	0.420337	22340	Vegfb
04151	PI3K-Akt signaling pathway	2.08635	0.213562	0.420337	12478	Cd19
04151	PI3K-Akt signaling pathway	2.08635	0.213562	0.420337	14171	Fgf17
04151	PI3K-Akt signaling pathway	2.08635	0.213562	0.420337	64654	Fgf23
00260	Glycine, serine and threonine metabolism	5.35	0.215479	0.420337	12411	Cbs
00260	Glycine, serine and threonine metabolism	5.35	0.215479	0.420337	26912	Gcat
04216	Ferroptosis	5.35	0.215479	0.420337	67443	Map1lc3b
04216	Ferroptosis	5.35	0.215479	0.420337	26570	Slc7a11
00140	Steroid hormone biosynthesis	3.48913	0.221807	0.429653	14979	H2-Ke6
00140	Steroid hormone biosynthesis	3.48913	0.221807	0.429653	13076	Cyp1a1
00140	Steroid hormone biosynthesis	3.48913	0.221807	0.429653	394432	Ugt1a7c
04350	TGF-beta signaling pathway	3.37895	0.239617	0.457751	15902	Id2
04350	TGF-beta signaling pathway	3.37895	0.239617	0.457751	68010	Bambi
04350	TGF-beta signaling pathway	3.37895	0.239617	0.457751	21815	Tgif1
04640	Hematopoietic cell lineage	3.37895	0.239617	0.457751	16178	Il1r2
04640	Hematopoietic cell lineage	3.37895	0.239617	0.457751	16176	Il1b
04640	Hematopoietic cell lineage	3.37895	0.239617	0.457751	12478	Cd19
03420	Nucleotide excision repair	4.97674	0.24498	0.464791	19718	Rfc2
03420	Nucleotide excision repair	4.97674	0.24498	0.464791	17420	Mnat1
00830	Retinol metabolism	3.30928	0.251851	0.474577	394432	Ugt1a7c
00830	Retinol metabolism	3.30928	0.251851	0.474577	79235	Lrat
00830	Retinol metabolism	3.30928	0.251851	0.474577	13076	Cyp1a1
00564	Glycerophospholipid metabolism	3.27551	0.258075	0.483019	12660	Chka
00564	Glycerophospholipid metabolism	3.27551	0.258075	0.483019	231510	Gpat3
00564	Glycerophospholipid metabolism	3.27551	0.258075	0.483019	110197	Dgkg
05215	Prostate cancer	3.24242	0.26437	0.489847	16178	Il1r2
05215	Prostate cancer	3.24242	0.26437	0.489847	18035	Nfkbia
05215	Prostate cancer	3.24242	0.26437	0.489847	78284	Creb3l4
04934	Cushing syndrome	2.64198	0.26526	0.489847	78284	Creb3l4
04934	Cushing syndrome	2.64198	0.26526	0.489847	15370	Nr4a1
04934	Cushing syndrome	2.64198	0.26526	0.489847	12289	Cacna1d
04934	Cushing syndrome	2.64198	0.26526	0.489847	19416	Rasd1
04014	Ras signaling pathway	2.30603	0.271566	0.49817	14171	Fgf17
04014	Ras signaling pathway	2.30603	0.271566	0.49817	22340	Vegfb
04014	Ras signaling pathway	2.30603	0.271566	0.49817	23872	Ets2
04014	Ras signaling pathway	2.30603	0.271566	0.49817	64654	Fgf23
04014	Ras signaling pathway	2.30603	0.271566	0.49817	19730	Ralgds
05204	Chemical carcinogenesis	3.17822	0.277168	0.505102	19225	Ptgs2
05204	Chemical carcinogenesis	3.17822	0.277168	0.505102	394432	Ugt1a7c
05204	Chemical carcinogenesis	3.17822	0.277168	0.505102	13076	Cyp1a1
04122	Sulfur relay system	13.375	0.289477	0.524086	68205	Urm1
04659	Th17 cell differentiation	3.08654	0.29688	0.527275	18035	Nfkbia
04659	Th17 cell differentiation	3.08654	0.29688	0.527275	16176	Il1b
04659	Th17 cell differentiation	3.08654	0.29688	0.527275	14281	Fos
04973	Carbohydrate digestion and absorption	4.45833	0.296949	0.527275	216019	Hkdc1
04973	Carbohydrate digestion and absorption	4.45833	0.296949	0.527275	12289	Cacna1d
05030	Cocaine addiction	4.45833	0.296949	0.527275	12569	Cdk5r1
05030	Cocaine addiction	4.45833	0.296949	0.527275	78284	Creb3l4
00520	Amino sugar and nucleotide sugar metabolism	4.28	0.318637	0.562181	14635	Galk1
00520	Amino sugar and nucleotide sugar metabolism	4.28	0.318637	0.562181	216019	Hkdc1
04514	Cell adhesion molecules	2.45977	0.325274	0.566673	12477	Ctla4
04514	Cell adhesion molecules	2.45977	0.325274	0.566673	216856	Nlgn2
04514	Cell adhesion molecules	2.45977	0.325274	0.566673	94332	Cadm3
04514	Cell adhesion molecules	2.45977	0.325274	0.566673	20969	Sdc1
05225	Hepatocellular carcinoma	2.45977	0.325274	0.566673	212398	Frat2
05225	Hepatocellular carcinoma	2.45977	0.325274	0.566673	13197	Gadd45a
05225	Hepatocellular carcinoma	2.45977	0.325274	0.566673	23882	Gadd45g
05225	Hepatocellular carcinoma	2.45977	0.325274	0.566673	17873	Gadd45b
04340	Hedgehog signaling pathway	4.11538	0.3408	0.59001	68525	Evc2
04340	Hedgehog signaling pathway	4.11538	0.3408	0.59001	16147	Ihh
00330	Arginine and proline metabolism	3.96296	0.363413	0.625252	209027	Pycr1
00330	Arginine and proline metabolism	3.96296	0.363413	0.625252	18263	Odc1
04066	HIF-1 signaling pathway	2.81579	0.366857	0.62728	13808	Eno3
04066	HIF-1 signaling pathway	2.81579	0.366857	0.62728	13614	Edn1
04066	HIF-1 signaling pathway	2.81579	0.366857	0.62728	216019	Hkdc1
05163	Human cytomegalovirus infection	2.08984	0.374547	0.6365	78284	Creb3l4
05163	Human cytomegalovirus infection	2.08984	0.374547	0.6365	19225	Ptgs2
05163	Human cytomegalovirus infection	2.08984	0.374547	0.6365	18035	Nfkbia
05163	Human cytomegalovirus infection	2.08984	0.374547	0.6365	16176	Il1b
05163	Human cytomegalovirus infection	2.08984	0.374547	0.6365	20303	Ccl4
04218	Cellular senescence	2.32609	0.379943	0.641734	23882	Gadd45g
04218	Cellular senescence	2.32609	0.379943	0.641734	13197	Gadd45a
04218	Cellular senescence	2.32609	0.379943	0.641734	17873	Gadd45b
04218	Cellular senescence	2.32609	0.379943	0.641734	12289	Cacna1d
04923	Regulation of lipolysis in adipocytes	3.82143	0.386452	0.648772	19225	Ptgs2
04923	Regulation of lipolysis in adipocytes	3.82143	0.386452	0.648772	384783	Irs2
04722	Neurotrophin signaling pathway	2.65289	0.419505	0.700017	12070	Bex3
04722	Neurotrophin signaling pathway	2.65289	0.419505	0.700017	17179	Matk
04722	Neurotrophin signaling pathway	2.65289	0.419505	0.700017	18035	Nfkbia
04062	Chemokine signaling pathway	2.22917	0.426579	0.70756	16963	Xcl1
04062	Chemokine signaling pathway	2.22917	0.426579	0.70756	20303	Ccl4
04062	Chemokine signaling pathway	2.22917	0.426579	0.70756	20310	Cxcl2
04062	Chemokine signaling pathway	2.22917	0.426579	0.70756	18035	Nfkbia
04152	AMPK signaling pathway	2.54762	0.458815	0.753437	384783	Irs2
04152	AMPK signaling pathway	2.54762	0.458815	0.753437	78284	Creb3l4
04152	AMPK signaling pathway	2.54762	0.458815	0.753437	12894	Cpt1a
03450	Non-homologous end-joining	8.23077	0.459678	0.753437	14156	Fen1
05330	Allograft rejection	3.39683	0.470107	0.765998	16160	Il12b
05330	Allograft rejection	3.39683	0.470107	0.765998	16153	Il10
00310	Lysine degradation	3.34375	0.482404	0.781438	64707	Suv39h2
00310	Lysine degradation	3.34375	0.482404	0.781438	67956	Kmt5a
00533	Glycosaminoglycan biosynthesis - keratan sulfate	7.64286	0.492771	0.793591	227327	B3gnt7
04142	Lysosome	2.45038	0.499452	0.799701	74008	Arsg
04142	Lysosome	2.45038	0.499452	0.799701	11605	Gla
04142	Lysosome	2.45038	0.499452	0.799701	13036	Ctsh
00010	Glycolysis / Gluconeogenesis	3.19403	0.519757	0.82743	216019	Hkdc1
00010	Glycolysis / Gluconeogenesis	3.19403	0.519757	0.82743	13808	Eno3
04622	RIG-I-like receptor signaling pathway	3.05714	0.557752	0.873306	16160	Il12b
04622	RIG-I-like receptor signaling pathway	3.05714	0.557752	0.873306	18035	Nfkbia
04940	Type I diabetes mellitus	3.05714	0.557752	0.873306	16176	Il1b
04940	Type I diabetes mellitus	3.05714	0.557752	0.873306	16160	Il12b
00603	Glycosphingolipid biosynthesis - globo and isoglobo series	6.6875	0.558033	0.873306	11605	Gla
04015	Rap1 signaling pathway	2	0.567035	0.882408	14171	Fgf17
04015	Rap1 signaling pathway	2	0.567035	0.882408	64654	Fgf23
04015	Rap1 signaling pathway	2	0.567035	0.882408	19730	Ralgds
04015	Rap1 signaling pathway	2	0.567035	0.882408	22340	Vegfb
00980	Metabolism of xenobiotics by cytochrome P450	2.93151	0.596323	0.922801	13076	Cyp1a1
00980	Metabolism of xenobiotics by cytochrome P450	2.93151	0.596323	0.922801	394432	Ugt1a7c
04270	Vascular smooth muscle contraction	2.24476	0.601888	0.926238	12289	Cacna1d
04270	Vascular smooth muscle contraction	2.24476	0.601888	0.926238	11475	Acta2
04270	Vascular smooth muscle contraction	2.24476	0.601888	0.926238	13614	Edn1
04917	Prolactin signaling pathway	2.89189	0.609297	0.927337	12702	Socs3
04917	Prolactin signaling pathway	2.89189	0.609297	0.927337	14281	Fos
04918	Thyroid hormone synthesis	2.89189	0.609297	0.927337	78284	Creb3l4
04918	Thyroid hormone synthesis	2.89189	0.609297	0.927337	14828	Hspa5
04924	Renin secretion	2.81579	0.635409	0.961794	12289	Cacna1d
04924	Renin secretion	2.81579	0.635409	0.961794	13614	Edn1
05322	Systemic lupus erythematosus	2.16892	0.646401	0.973115	20641	Snrpd1
05322	Systemic lupus erythematosus	2.16892	0.646401	0.973115	15081	H3f3b
05322	Systemic lupus erythematosus	2.16892	0.646401	0.973115	16153	Il10
05320	Autoimmune thyroid disease	2.70886	0.674952	1	12477	Ctla4
05320	Autoimmune thyroid disease	2.70886	0.674952	1	16153	Il10
01210	2-Oxocarboxylic acid metabolism	5.35	0.684942	1	67834	Idh3a
04921	Oxytocin signaling pathway	2.09804	0.691869	1	12289	Cacna1d
04921	Oxytocin signaling pathway	2.09804	0.691869	1	14281	Fos
04921	Oxytocin signaling pathway	2.09804	0.691869	1	19225	Ptgs2
00531	Glycosaminoglycan degradation	5.09524	0.715933	1	15442	Hpse
04150	mTOR signaling pathway	2.05769	0.719573	1	110379	Sec13
04150	mTOR signaling pathway	2.05769	0.719573	1	227743	Mapkap1
04150	mTOR signaling pathway	2.05769	0.719573	1	52187	Rragd
03430	Mismatch repair	4.86364	0.746634	1	19718	Rfc2
04970	Salivary secretion	2.48837	0.768692	1	17105	Lyz2
04970	Salivary secretion	2.48837	0.768692	1	12671	Chrm3
05235	PD-L1 expression and PD-1 checkpoint pathway in cancer	2.43182	0.795784	1	14281	Fos
05235	PD-L1 expression and PD-1 checkpoint pathway in cancer	2.43182	0.795784	1	18035	Nfkbia
05160	Hepatitis C	1.94545	0.804385	1	18035	Nfkbia
05160	Hepatitis C	1.94545	0.804385	1	12702	Socs3
05160	Hepatitis C	1.94545	0.804385	1	27103	Eif2ak4
04727	GABAergic synapse	2.40449	0.809373	1	12289	Cacna1d
04727	GABAergic synapse	2.40449	0.809373	1	14400	Gabrb1
04211	Longevity regulating pathway	2.37778	0.822989	1	384783	Irs2
04211	Longevity regulating pathway	2.37778	0.822989	1	78284	Creb3l4
04612	Antigen processing and presentation	2.37778	0.822989	1	14828	Hspa5
04612	Antigen processing and presentation	2.37778	0.822989	1	15512	Hspa2
04912	GnRH signaling pathway	2.37778	0.822989	1	12289	Cacna1d
04912	GnRH signaling pathway	2.37778	0.822989	1	13653	Egr1
05410	Hypertrophic cardiomyopathy	2.35165	0.836629	1	12289	Cacna1d
05410	Hypertrophic cardiomyopathy	2.35165	0.836629	1	13614	Edn1
00563	Glycosylphosphatidylinositol (GPI)-anchor biosynthesis	4.28	0.837028	1	56176	Pigp
05310	Asthma	4.28	0.837028	1	16153	Il10
04742	Taste transduction	2.32609	0.850291	1	12671	Chrm3
04742	Taste transduction	2.32609	0.850291	1	110326	Tas1r1
04610	Complement and coagulation cascades	2.30108	0.863975	1	21824	Thbd
04610	Complement and coagulation cascades	2.30108	0.863975	1	18793	Plaur
00340	Histidine metabolism	4.11538	0.866599	1	140483	Hnmt
00790	Folate biosynthesis	4.11538	0.866599	1	11647	Alpl
04022	cGMP-PKG signaling pathway	1.85549	0.881625	1	384783	Irs2
04022	cGMP-PKG signaling pathway	1.85549	0.881625	1	12289	Cacna1d
04022	cGMP-PKG signaling pathway	1.85549	0.881625	1	78284	Creb3l4
00601	Glycosphingolipid biosynthesis - lacto and neolacto series	3.96296	0.895893	1	102637973	Gm34653
04392	Hippo signaling pathway - multiple species	3.96296	0.895893	1	50523	Lats2
04744	Phototransduction	3.96296	0.895893	1	14685	Gnat1
04950	Maturity onset diabetes of the young	3.96296	0.895893	1	18508	Pax6
03020	RNA polymerase	3.68966	0.953664	1	17749	Polr2k
03060	Protein export	3.68966	0.953664	1	14828	Hspa5
04916	Melanogenesis	2.14	0.960229	1	78284	Creb3l4
04916	Melanogenesis	2.14	0.960229	1	13614	Edn1
04976	Bile secretion	2.14	0.960229	1	394432	Ugt1a7c
04976	Bile secretion	2.14	0.960229	1	20493	Slc10a1
04145	Phagosome	1.76374	0.97019	1	20288	Msr1
04145	Phagosome	1.76374	0.97019	1	226421	Rab7b
04145	Phagosome	1.76374	0.97019	1	12721	Coro1a
01523	Antifolate resistance	3.56667	0.982146	1	16176	Il1b
00053	Ascorbate and aldarate metabolism	3.45161	1	1	394432	Ugt1a7c
00020	Citrate cycle (TCA cycle)	3.34375	1	1	67834	Idh3a
00630	Glyoxylate and dicarboxylate metabolism	3.34375	1	1	66904	Pccb
04215	Apoptosis - multiple species	3.34375	1	1	11798	Xiap
04974	Protein digestion and absorption	1.98148	1	1	12813	Col10a1
04974	Protein digestion and absorption	1.98148	1	1	53867	Col5a3
01040	Biosynthesis of unsaturated fatty acids	3.14706	1	1	171210	Acot2
00051	Fructose and mannose metabolism	2.97222	1	1	216019	Hkdc1
05340	Primary immunodeficiency	2.97222	1	1	12478	Cd19
00250	Alanine, aspartate and glutamate metabolism	2.74359	1	1	11565	Adssl1
00620	Pyruvate metabolism	2.74359	1	1	66204	Acyp1
00513	Various types of N-glycan biosynthesis	2.675	1	1	230815	Man1c1
05033	Nicotine addiction	2.675	1	1	14400	Gabrb1
00760	Nicotinate and nicotinamide metabolism	2.60976	1	1	74080	Nmnat3
05150	Staphylococcus aureus infection	1.72581	1	1	16153	Il10
05150	Staphylococcus aureus infection	1.72581	1	1	16668	Krt18
00860	Porphyrin and chlorophyll metabolism	2.54762	1	1	394432	Ugt1a7c
04672	Intestinal immune network for IgA production	2.48837	1	1	16153	Il10
04975	Fat digestion and absorption	2.48837	1	1	17777	Mttp
04750	Inflammatory mediator regulation of TRP channels	1.68504	1	1	16176	Il1b
04750	Inflammatory mediator regulation of TRP channels	1.68504	1	1	58170	Asic5
00565	Ether lipid metabolism	2.22917	1	1	18476	Pafah1b3
04371	Apelin signaling pathway	1.56204	1	1	11475	Acta2
04371	Apelin signaling pathway	1.56204	1	1	13653	Egr1
05206	MicroRNAs in cancer	1.41254	1	1	19225	Ptgs2
05206	MicroRNAs in cancer	1.41254	1	1	18712	Pim1
05206	MicroRNAs in cancer	1.41254	1	1	384783	Irs2
05206	MicroRNAs in cancer	1.41254	1	1	24064	Spry2
00510	N-Glycan biosynthesis	2.14	1	1	230815	Man1c1
03460	Fanconi anemia pathway	2.09804	1	1	272158	Poln
00380	Tryptophan metabolism	2.05769	1	1	13076	Cyp1a1
00270	Cysteine and methionine metabolism	2.01887	1	1	12411	Cbs
04072	Phospholipase D signaling pathway	1.43624	1	1	110197	Dgkg
04072	Phospholipase D signaling pathway	1.43624	1	1	19730	Ralgds
04370	VEGF signaling pathway	1.84483	1	1	19225	Ptgs2
04929	GnRH secretion	1.69841	1	1	12289	Cacna1d
05332	Graft-versus-host disease	1.69841	1	1	16176	Il1b
00970	Aminoacyl-tRNA biosynthesis	1.62121	1	1	107045	Lars
04810	Regulation of actin cytoskeleton	1.45909	1	1	12671	Chrm3
04810	Regulation of actin cytoskeleton	1.45909	1	1	14171	Fgf17
04810	Regulation of actin cytoskeleton	1.45909	1	1	64654	Fgf23
05230	Central carbon metabolism in cancer	1.55072	1	1	216019	Hkdc1
05203	Viral carcinogenesis	1.40175	1	1	13654	Egr2
05203	Viral carcinogenesis	1.40175	1	1	18035	Nfkbia
05203	Viral carcinogenesis	1.40175	1	1	78284	Creb3l4
05221	Acute myeloid leukemia	1.52857	1	1	18712	Pim1
00480	Glutathione metabolism	1.50704	1	1	18263	Odc1
00982	Drug metabolism - cytochrome P450	1.50704	1	1	394432	Ugt1a7c
04520	Adherens junction	1.50704	1	1	20613	Snai1
04971	Gastric acid secretion	1.42667	1	1	12671	Chrm3
05412	Arrhythmogenic right ventricular cardiomyopathy	1.38961	1	1	12289	Cacna1d
01524	Platinum drug resistance	1.3375	1	1	11798	Xiap
00590	Arachidonic acid metabolism	1.24419	1	1	19225	Ptgs2
04512	ECM-receptor interaction	1.21591	1	1	20969	Sdc1
05032	Morphine addiction	1.17582	1	1	14400	Gabrb1
01522	Endocrine resistance	1.15054	1	1	14281	Fos
05414	Dilated cardiomyopathy	1.1383	1	1	12289	Cacna1d
04070	Phosphatidylinositol signaling system	1.11458	1	1	110197	Dgkg
04261	Adrenergic signaling in cardiomyocytes	1.40789	1	1	12289	Cacna1d
04261	Adrenergic signaling in cardiomyocytes	1.40789	1	1	78284	Creb3l4
04390	Hippo signaling pathway	1.36306	1	1	15902	Id2
04390	Hippo signaling pathway	1.36306	1	1	50523	Lats2
04510	Focal adhesion	1.06468	1	1	22340	Vegfb
04510	Focal adhesion	1.06468	1	1	11798	Xiap
05034	Alcoholism	1.0439	1	1	15081	H3f3b
05034	Alcoholism	1.0439	1	1	78284	Creb3l4
04144	Endocytosis	1.18015	1	1	80794	Cblc
04144	Endocytosis	1.18015	1	1	28084	Vps25
04144	Endocytosis	1.18015	1	1	15512	Hspa2
04724	Glutamatergic synapse	0.946903	1	1	12289	Cacna1d
04071	Sphingolipid signaling pathway	0.862903	1	1	74442	Sgms2
04114	Oocyte meiosis	0.89916	1	1	140557	Smc1b
04360	Axon guidance	0.59116	1	1	11854	Rhod
04530	Tight junction	0.640719	1	1	12289	Cacna1d
04613	Neutrophil extracellular trap formation?New!	0.521951	1	1	15081	H3f3b
04650	Natural killer cell mediated cytotoxicity	0.884298	1	1	379043	Raet1e
04919	Thyroid hormone signaling pathway	0.891667	1	1	216154	Med16
04972	Pancreatic secretion	0.938596	1	1	12671	Chrm3
05165	Human papillomavirus infection	0.88674	1	1	19225	Ptgs2
05165	Human papillomavirus infection	0.88674	1	1	78284	Creb3l4
05165	Human papillomavirus infection	0.88674	1	1	103768	Tubg2
05170	Human immunodeficiency virus 1 infection	0.891667	1	1	18035	Nfkbia
05170	Human immunodeficiency virus 1 infection	0.891667	1	1	14281	Fos

## Sheet: 下调基因显著性Pathway
path_id	path_name	path_diffgene_count	path_gene_count	enrichment	pvalue	FDR
05168	Herpes simplex virus 1 infection	53	458	12.047	1.99998e-39	5.51995e-37
01100	Metabolic pathways	48	1572	3.17875	1.60621e-11	2.21657e-09
04060	Cytokine-cytokine receptor interaction	19	293	6.75077	4.27577e-10	3.9337e-08
05200	Pathways in cancer	24	543	4.60128	4.11948e-09	2.84244e-07
04015	Rap1 signaling pathway	14	214	6.81054	1.08056e-07	5.9647e-06
05160	Hepatitis C	12	165	7.5712	3.33825e-07	1.53559e-05
04630	JAK-STAT signaling pathway	12	169	7.392	4.34069e-07	1.71147e-05
04141	Protein processing in endoplasmic reticulum	12	172	7.26307	5.26056e-07	1.81489e-05
05162	Measles	11	146	7.84345	8.06177e-07	2.47228e-05
05169	Epstein-Barr virus infection	13	231	5.85867	1.9093e-06	5.1469e-05
04144	Endocytosis	14	272	5.35829	2.0513e-06	5.1469e-05
05163	Human cytomegalovirus infection	13	256	5.28653	6.04282e-06	0.000138985
04621	NOD-like receptor signaling pathway	11	211	5.42722	2.98333e-05	0.000618332
05164	Influenza A	10	173	6.01757	3.13647e-05	0.000618332
05146	Amoebiasis	8	107	7.78348	3.94024e-05	0.000725005
05145	Toxoplasmosis	8	110	7.5712	4.82961e-05	0.00082325
04151	PI3K-Akt signaling pathway	14	359	4.05977	5.07631e-05	0.00082325
04330	Notch signaling pathway	6	54	11.5671	5.36902e-05	0.00082325
04062	Chemokine signaling pathway	10	192	5.42208	7.76373e-05	0.00112778
05161	Hepatitis B	9	163	5.74807	0.000127423	0.00169262
05171	Coronavirus disease - COVID-19?New!	11	247	4.63621	0.000128787	0.00169262
04380	Osteoclast differentiation	8	128	6.5065	0.000144933	0.00181825
04620	Toll-like receptor signaling pathway	7	100	7.28728	0.000216602	0.00259923
05165	Human papillomavirus infection	13	362	3.73854	0.000238369	0.00274124
05202	Transcriptional misregulation in cancer	10	223	4.66834	0.000275362	0.00282226
04659	Th17 cell differentiation	7	104	7.007	0.000278114	0.00282226
04360	Axon guidance	9	181	5.17644	0.000287376	0.00282226
04064	NF-kappa B signaling pathway	7	105	6.94027	0.000295532	0.00282226
05167	Kaposi sarcoma-associated herpesvirus infection	10	225	4.62684	0.000296541	0.00282226
04979	Cholesterol metabolism	5	49	10.6229	0.000433659	0.00398966
04935	Growth hormone synthesis, secretion and action	7	116	6.28214	0.000552944	0.00492299
04010	MAPK signaling pathway	11	294	3.89505	0.000606635	0.00523223
04923	Regulation of lipolysis in adipocytes	5	56	9.295	0.000821988	0.00687481
04658	Th1 and Th2 cell differentiation	6	88	7.098	0.000855151	0.00694181
04750	Inflammatory mediator regulation of TRP channels	7	127	5.73802	0.000967944	0.00763293
03410	Base excision repair	4	34	12.2475	0.00124543	0.00926196
04061	Viral protein interaction with cytokine and cytokine receptor	6	95	6.57499	0.00129603	0.00926196
04640	Hematopoietic cell lineage	6	95	6.57499	0.00129603	0.00926196
04213	Longevity regulating pathway - multiple species	5	62	8.39548	0.00132817	0.00926196
05135	Yersinia infection	7	134	5.43827	0.00134231	0.00926196
04740	Olfactory transduction	1	1167	0.0892065	0.00142872	0.00940602
04623	Cytosolic DNA-sensing pathway	5	63	8.26222	0.00143135	0.00940602
04550	Signaling pathways regulating pluripotency of stem cells	7	140	5.2052	0.00174838	0.0111289
04218	Cellular senescence	8	184	4.52626	0.00177417	0.0111289
05418	Fluid shear stress and atherosclerosis	7	146	4.99129	0.00224696	0.0137813
04115	p53 signaling pathway	5	72	7.22944	0.00265449	0.0159269
00860	Porphyrin and chlorophyll metabolism	4	42	9.91467	0.00282884	0.0166119
04510	Focal adhesion	8	201	4.14344	0.00316543	0.0182012
04668	TNF signaling pathway	6	113	5.52765	0.00325896	0.0183566
04930	Type II diabetes mellitus	4	48	8.67533	0.00469929	0.0259401
00510	N-Glycan biosynthesis	4	50	8.32832	0.0054785	0.0296483
04540	Gap junction	5	86	6.05256	0.00592014	0.0314223
00534	Glycosaminoglycan biosynthesis - heparan sulfate / heparin	3	24	13.013	0.00614722	0.032012
00563	Glycosylphosphatidylinositol (GPI)-anchor biosynthesis	3	25	12.4925	0.00693587	0.0339209
04068	FoxO signaling pathway	6	131	4.76812	0.00697641	0.0339209
04211	Longevity regulating pathway	5	90	5.78355	0.00724071	0.0339209
04612	Antigen processing and presentation	5	90	5.78355	0.00724071	0.0339209
04914	Progesterone-mediated oocyte maturation	5	90	5.78355	0.00724071	0.0339209
05203	Viral carcinogenesis	8	229	3.63682	0.00725121	0.0339209
04915	Estrogen signaling pathway	6	134	4.66137	0.00782237	0.0359829
05222	Small cell lung cancer	5	93	5.59699	0.00836384	0.0378429
04910	Insulin signaling pathway	6	139	4.4937	0.00940176	0.0417996
04020	Calcium signaling pathway	8	240	3.47013	0.00969267	0.0417996
05170	Human immunodeficiency virus 1 infection	8	240	3.47013	0.00969267	0.0417996
04730	Long-term depression	4	60	6.94027	0.0107571	0.0451458
04080	Neuroactive ligand-receptor interaction	10	358	2.90793	0.0107957	0.0451458
05166	Human T-cell leukemia virus 1 infection	8	247	3.37179	0.0115536	0.0475937
04130	SNARE interactions in vesicular transport	3	33	9.464	0.0155432	0.0630872
04928	Parathyroid hormone synthesis, secretion and action	5	108	4.81963	0.0159581	0.0638323
01040	Biosynthesis of unsaturated fatty acids	3	34	9.18565	0.0169269	0.0667403
04725	Cholinergic synapse	5	112	4.6475	0.0186171	0.0719189
04622	RIG-I-like receptor signaling pathway	4	70	5.9488	0.0187615	0.0719189
04520	Adherens junction	4	71	5.86501	0.0197329	0.0746066
04927	Cortisol synthesis and secretion	4	72	5.78355	0.0207375	0.0773454
05216	Thyroid cancer	3	37	8.44086	0.0215165	0.0791807
04917	Prolactin signaling pathway	4	74	5.62724	0.0228482	0.0829751
04960	Aldosterone-regulated sodium reabsorption	3	38	8.21874	0.0231959	0.0831439
05143	African trypanosomiasis	3	39	8.008	0.0249517	0.0882907
00260	Glycine, serine and threonine metabolism	3	40	7.8078	0.0267847	0.0924072
00513	Various types of N-glycan biosynthesis	3	40	7.8078	0.0267847	0.0924072
04217	Necroptosis	6	174	3.58979	0.0279818	0.0953453
04611	Platelet activation	5	124	4.19774	0.0284654	0.0954218
03440	Homologous recombination	3	41	7.61737	0.0286957	0.0954218
00533	Glycosaminoglycan biosynthesis - keratan sulfate	2	14	14.872	0.031068	0.102081
04142	Lysosome	5	131	3.97343	0.0356401	0.115726
04911	Insulin secretion	4	86	4.84205	0.0385484	0.122292
04970	Salivary secretion	4	86	4.84205	0.0385484	0.122292
00230	Purine metabolism	5	136	3.82735	0.0414702	0.126485
04210	Apoptosis	5	136	3.82735	0.0414702	0.126485
04512	ECM-receptor interaction	4	88	4.732	0.0417034	0.126485
05235	PD-L1 expression and PD-1 checkpoint pathway in cancer	4	88	4.732	0.0417034	0.126485
04140	Autophagy - animal	5	138	3.77188	0.0439746	0.131924
04912	GnRH signaling pathway	4	90	4.62684	0.0450207	0.13361
04657	IL-17 signaling pathway	4	91	4.576	0.0467411	0.13724
02010	ABC transporters	3	50	6.24624	0.0495167	0.143859
01522	Endocrine resistance	4	93	4.47759	0.0503072	0.144209
04270	Vascular smooth muscle contraction	5	143	3.64	0.0506822	0.144209
05414	Dilated cardiomyopathy	4	94	4.42996	0.0521535	0.145647
03460	Fanconi anemia pathway	3	51	6.12376	0.0522428	0.145647
04072	Phospholipase D signaling pathway	5	149	3.49342	0.0596048	0.164509
05215	Prostate cancer	4	99	4.20622	0.0620307	0.16898
00100	Steroid biosynthesis	2	20	10.4104	0.0624492	0.16898
04921	Oxytocin signaling pathway	5	153	3.40209	0.0661029	0.17713
01240	Biosynthesis of cofactors?New!	5	154	3.38	0.0677979	0.179925
04925	Aldosterone synthesis and secretion	4	102	4.08251	0.068484	0.180015
05144	Malaria	3	57	5.47916	0.0703755	0.182144
05142	Chagas disease	4	103	4.04287	0.0707245	0.182144
04150	mTOR signaling pathway	5	156	3.33667	0.0712739	0.182144
04390	Hippo signaling pathway	5	157	3.31541	0.0730551	0.183742
04024	cAMP signaling pathway	6	215	2.90523	0.0732306	0.183742
00515	Mannose type O-glycan biosynthesis	2	23	9.05252	0.0815972	0.20289
05321	Inflammatory bowel disease	3	62	5.03729	0.087835	0.216451
04929	GnRH secretion	3	63	4.95733	0.0915844	0.221731
05332	Graft-versus-host disease	3	63	4.95733	0.0915844	0.221731
04530	Tight junction	5	167	3.11689	0.0924954	0.221989
05310	Asthma	2	25	8.32832	0.095545	0.227331
04714	Thermogenesis	6	230	2.71576	0.0980077	0.230151
04972	Pancreatic secretion	4	114	3.65277	0.098398	0.230151
04014	Ras signaling pathway	6	232	2.69234	0.101686	0.235842
04664	Fc epsilon RI signaling pathway	3	66	4.732	0.103348	0.237699
04022	cGMP-PKG signaling pathway	5	173	3.00879	0.105622	0.240922
04720	Long-term potentiation	3	67	4.66137	0.10744	0.242159
04514	Cell adhesion molecules	5	174	2.99149	0.107919	0.242159
05206	MicroRNAs in cancer	7	303	2.40504	0.112902	0.251297
00512	Mucin type O-glycan biosynthesis	2	28	7.436	0.118139	0.260603
04650	Natural killer cell mediated cytotoxicity	4	121	3.44145	0.118971	0.260603
05221	Acute myeloid leukemia	3	70	4.4616	0.12023	0.261288
04110	Cell cycle	4	123	3.3855	0.12528	0.269789
00062	Fatty acid elongation	2	29	7.17959	0.126097	0.269789
04071	Sphingolipid signaling pathway	4	124	3.35819	0.128508	0.272171
05218	Melanoma	3	72	4.33767	0.129182	0.272171
04152	AMPK signaling pathway	4	126	3.30489	0.135107	0.282497
05214	Glioma	3	74	4.22043	0.138473	0.287358
04971	Gastric acid secretion	3	75	4.16416	0.143245	0.295041
04924	Renin secretion	3	76	4.10937	0.1481	0.300556
05220	Chronic myeloid leukemia	3	76	4.10937	0.1481	0.300556
01521	EGFR tyrosine kinase inhibitor resistance	3	79	3.95332	0.163166	0.328713
04662	B cell receptor signaling pathway	3	81	3.8557	0.173622	0.347245
05017	Spinocerebellar ataxia	4	141	2.9533	0.190801	0.378856
04120	Ubiquitin mediated proteolysis	4	145	2.87183	0.207498	0.409068
03320	PPAR signaling pathway	3	89	3.50912	0.21868	0.425041
04727	GABAergic synapse	3	89	3.50912	0.21868	0.425041
00440	Phosphonate and phosphinate metabolism	1	6	17.3507	0.22508	0.434421
05032	Morphine addiction	3	91	3.432	0.230734	0.442241
04742	Taste transduction	3	92	3.3947	0.236877	0.450883
04810	Regulation of actin cytoskeleton	5	220	2.366	0.249004	0.47072
04350	TGF-beta signaling pathway	3	95	3.28749	0.255761	0.4761
00514	Other types of O-glycan biosynthesis	2	43	4.84205	0.257025	0.4761
03420	Nucleotide excision repair	2	43	4.84205	0.257025	0.4761
04070	Phosphatidylinositol signaling system	3	96	3.25325	0.262206	0.482458
00564	Glycerophospholipid metabolism	3	98	3.18686	0.275317	0.499917
05231	Choline metabolism in cancer	3	98	3.18686	0.275317	0.499917
04934	Cushing syndrome	4	162	2.57047	0.286988	0.517445
04976	Bile secretion	3	100	3.12312	0.288719	0.517445
05016	Huntington disease	6	302	2.06829	0.291601	0.519238
05204	Chemical carcinogenesis	3	101	3.0922	0.295528	0.522858
00565	Ether lipid metabolism	2	48	4.33767	0.311297	0.547248
00600	Sphingolipid metabolism	2	50	4.16416	0.333925	0.583312
04340	Hedgehog signaling pathway	2	52	4.004	0.357037	0.619763
04931	Insulin resistance	3	110	2.8392	0.359929	0.620877
00330	Arginine and proline metabolism	2	54	3.8557	0.380606	0.651821
04724	Glutamatergic synapse	3	113	2.76382	0.382591	0.651821
05152	Tuberculosis	4	180	2.31342	0.385601	0.652919
05022	Pathways of neurodegeneration - multiple diseases?New!	8	472	1.76447	0.392355	0.65826
05132	Salmonella infection	5	253	2.05739	0.393525	0.65826
04145	Phagosome	4	182	2.288	0.397426	0.660781
04670	Leukocyte transendothelial migration	3	118	2.64671	0.421611	0.696793
00240	Pyrimidine metabolism	2	58	3.58979	0.429012	0.697461
04370	VEGF signaling pathway	2	58	3.58979	0.429012	0.697461
04114	Oocyte meiosis	3	119	2.62447	0.429596	0.697461
00072	Synthesis and degradation of ketone bodies	1	12	8.67533	0.437512	0.702259
04919	Thyroid hormone signaling pathway	3	120	2.6026	0.437639	0.702259
05020	Prion disease	5	268	1.94224	0.470578	0.750749
01212	Fatty acid metabolism	2	62	3.35819	0.478947	0.759709
04913	Ovarian steroidogenesis	2	63	3.30489	0.491647	0.770992
05330	Allograft rejection	2	63	3.30489	0.491647	0.770992
04137	Mitophagy - animal	2	66	3.15467	0.530224	0.82679
00604	Glycosphingolipid biosynthesis - ganglio series	1	15	6.94027	0.539209	0.835436
04613	Neutrophil extracellular trap formation?New!	4	205	2.0313	0.54485	0.835436
05205	Proteoglycans in cancer	4	205	2.0313	0.54485	0.835436
04728	Dopaminergic synapse	3	135	2.31342	0.564842	0.861306
05230	Central carbon metabolism in cancer	2	69	3.01751	0.569459	0.863381
00603	Glycosphingolipid biosynthesis - globo and isoglobo series	1	16	6.5065	0.572459	0.863381
04940	Type I diabetes mellitus	2	70	2.9744	0.582672	0.874008
00982	Drug metabolism - cytochrome P450	2	71	2.93251	0.595948	0.884309
04920	Adipocytokine signaling pathway	2	71	2.93251	0.595948	0.884309
00450	Selenocompound metabolism	1	17	6.12376	0.605391	0.885065
00910	Nitrogen metabolism	1	17	6.12376	0.605391	0.885065
00562	Inositol phosphate metabolism	2	72	2.89178	0.609284	0.885065
05223	Non-small cell lung cancer	2	72	2.89178	0.609284	0.885065
00980	Metabolism of xenobiotics by cytochrome P450	2	73	2.85216	0.622678	0.899786
04918	Thyroid hormone synthesis	2	74	2.81362	0.636128	0.912382
00120	Primary bile acid biosynthesis	1	18	5.78355	0.638006	0.912382
05224	Breast cancer	3	147	2.12457	0.674327	0.957919
04721	Synaptic vesicle cycle	2	77	2.704	0.676791	0.957919
04723	Retrograde endocannabinoid signaling	3	148	2.11022	0.683716	0.962784
05010	Alzheimer disease	6	369	1.69275	0.700061	0.971709
05014	Amyotrophic lateral sclerosis	6	369	1.69275	0.700061	0.971709
00532	Glycosaminoglycan biosynthesis - chondroitin sulfate / dermatan sulfate	1	20	5.2052	0.702301	0.971709
05320	Autoimmune thyroid disease	2	79	2.63554	0.704137	0.971709
04932	Non-alcoholic fatty liver disease	3	151	2.06829	0.712104	0.977815
04261	Adrenergic signaling in cardiomyocytes	3	152	2.05468	0.721639	0.986001
00531	Glycosaminoglycan degradation	1	21	4.95733	0.733987	0.997933
03430	Mismatch repair	1	22	4.732	0.765368	1
00900	Terpenoid backbone biosynthesis	1	23	4.52626	0.796449	1
00590	Arachidonic acid metabolism	2	86	2.42102	0.801084	1
05416	Viral myocarditis	2	88	2.366	0.82907	1
05410	Hypertrophic cardiomyopathy	2	91	2.288	0.871234	1
04666	Fc gamma R-mediated phagocytosis	2	92	2.26313	0.885331	1
04610	Complement and coagulation cascades	2	93	2.2388	0.899446	1
00650	Butanoate metabolism	1	28	3.718	0.947435	1
00830	Retinol metabolism	2	97	2.14647	0.956056	1
04713	Circadian entrainment	2	98	2.12457	0.970238	1
04916	Melanogenesis	2	100	2.08208	0.998627	1
01523	Antifolate resistance	1	30	3.47013	1	1
04710	Circadian rhythm	1	30	3.47013	1	1
04933	AGE-RAGE signaling pathway in diabetic complications	2	101	2.06147	1	1
00053	Ascorbate and aldarate metabolism	1	31	3.35819	1	1
04660	T cell receptor signaling pathway	2	103	2.02144	1	1
00052	Galactose metabolism	1	32	3.25325	1	1
00500	Starch and sucrose metabolism	1	34	3.06188	1	1
00640	Propanoate metabolism	1	34	3.06188	1	1
00040	Pentose and glucuronate interconversions	1	35	2.9744	1	1
03030	DNA replication	1	35	2.9744	1	1
04625	C-type lectin receptor signaling pathway	2	112	1.859	1	1
00051	Fructose and mannose metabolism	1	36	2.89178	1	1
05340	Primary immunodeficiency	1	36	2.89178	1	1
04066	HIF-1 signaling pathway	2	114	1.82639	1	1
05033	Nicotine addiction	1	40	2.6026	1	1
04722	Neurotrophin signaling pathway	2	121	1.72073	1	1
00760	Nicotinate and nicotinamide metabolism	1	41	2.53912	1	1
05150	Staphylococcus aureus infection	2	124	1.6791	1	1
04975	Fat digestion and absorption	1	43	2.42102	1	1
03022	Basal transcription factors	1	44	2.366	1	1
04962	Vasopressin-regulated water reabsorption	1	44	2.366	1	1
04926	Relaxin signaling pathway	2	129	1.61402	1	1
04726	Serotonergic synapse	2	131	1.58937	1	1
04973	Carbohydrate digestion and absorption	1	48	2.16883	1	1
04371	Apelin signaling pathway	2	137	1.51977	1	1
00520	Amino sugar and nucleotide sugar metabolism	1	50	2.08208	1	1
00380	Tryptophan metabolism	1	52	2.002	1	1
00270	Cysteine and methionine metabolism	1	53	1.96423	1	1
00280	Valine, leucine and isoleucine degradation	1	57	1.82639	1	1
05213	Endometrial cancer	1	58	1.7949	1	1
04961	Endocrine and other factor-regulated calcium reabsorption	1	61	1.70662	1	1
05134	Legionellosis	1	61	1.70662	1	1
00310	Lysine degradation	1	64	1.62662	1	1
00970	Aminoacyl-tRNA biosynthesis	1	66	1.57733	1	1
00010	Glycolysis / Gluconeogenesis	1	67	1.55379	1	1
05211	Renal cell carcinoma	1	68	1.53094	1	1
05031	Amphetamine addiction	1	69	1.50875	1	1
05140	Leishmaniasis	1	70	1.4872	1	1
00480	Glutathione metabolism	1	71	1.46625	1	1
05100	Bacterial invasion of epithelial cells	1	76	1.36979	1	1
05212	Pancreatic cancer	1	76	1.36979	1	1
05133	Pertussis	1	77	1.352	1	1
05412	Arrhythmogenic right ventricular cardiomyopathy	1	77	1.352	1	1
01524	Platinum drug resistance	1	80	1.3013	1	1
03018	RNA degradation	1	84	1.23933	1	1
04012	ErbB signaling pathway	1	84	1.23933	1	1
04146	Peroxisome	1	86	1.21051	1	1
05210	Colorectal cancer	1	88	1.183	1	1
00140	Steroid hormone biosynthesis	1	92	1.13157	1	1
00983	Drug metabolism - other enzymes	1	92	1.13157	1	1
03015	mRNA surveillance pathway	1	102	1.02063	1	1
05322	Systemic lupus erythematosus	2	148	1.40681	1	1
05226	Gastric cancer	2	150	1.38805	1	1
04310	Wnt signaling pathway	2	162	1.28523	1	1
03013	RNA transport	2	182	1.144	1	1
00190	Oxidative phosphorylation	1	133	0.782737	1	1
03008	Ribosome biogenesis in eukaryotes	1	121	0.860364	1	1
03040	Spliceosome	1	134	0.776895	1	1
04922	Glucagon signaling pathway	1	104	1.001	1	1
04974	Protein digestion and absorption	1	108	0.963926	1	1
05034	Alcoholism	1	205	0.507824	1	1
05225	Hepatocellular carcinoma	1	174	0.598299	1	1

## Sheet: 显著性Pathway所包含下调基因
path_id	path_name	enrichment	pvalue	FDR	gene_id	gene_name
05168	Herpes simplex virus 1 infection	12.047	1.99998e-39	5.51995e-37	630294	Gm7030
05168	Herpes simplex virus 1 infection	12.047	1.99998e-39	5.51995e-37	12010	B2m
05168	Herpes simplex virus 1 infection	12.047	1.99998e-39	5.51995e-37	18708	Pik3r1
05168	Herpes simplex virus 1 infection	12.047	1.99998e-39	5.51995e-37	16416	Itgb3
05168	Herpes simplex virus 1 infection	12.047	1.99998e-39	5.51995e-37	100233208	Gm10778
05168	Herpes simplex virus 1 infection	12.047	1.99998e-39	5.51995e-37	108168395	Gm45871
05168	Herpes simplex virus 1 infection	12.047	1.99998e-39	5.51995e-37	170763	Zfp87
05168	Herpes simplex virus 1 infection	12.047	1.99998e-39	5.51995e-37	193452	Zfp184
05168	Herpes simplex virus 1 infection	12.047	1.99998e-39	5.51995e-37	210105	Zfp719
05168	Herpes simplex virus 1 infection	12.047	1.99998e-39	5.51995e-37	210583	Gm4767
05168	Herpes simplex virus 1 infection	12.047	1.99998e-39	5.51995e-37	212276	Zfp748
05168	Herpes simplex virus 1 infection	12.047	1.99998e-39	5.51995e-37	218311	Zfp455
05168	Herpes simplex virus 1 infection	12.047	1.99998e-39	5.51995e-37	223669	Zfp7
05168	Herpes simplex virus 1 infection	12.047	1.99998e-39	5.51995e-37	224585	Zfp160
05168	Herpes simplex virus 1 infection	12.047	1.99998e-39	5.51995e-37	22640	Zfp1
05168	Herpes simplex virus 1 infection	12.047	1.99998e-39	5.51995e-37	22648	Zfp11
05168	Herpes simplex virus 1 infection	12.047	1.99998e-39	5.51995e-37	22688	Zfp26
05168	Herpes simplex virus 1 infection	12.047	1.99998e-39	5.51995e-37	22746	Zfp85
05168	Herpes simplex virus 1 infection	12.047	1.99998e-39	5.51995e-37	22751	Zfp90
05168	Herpes simplex virus 1 infection	12.047	1.99998e-39	5.51995e-37	228876	Zfp334
05168	Herpes simplex virus 1 infection	12.047	1.99998e-39	5.51995e-37	230162	Zfp189
05168	Herpes simplex virus 1 infection	12.047	1.99998e-39	5.51995e-37	232854	Zfp418
05168	Herpes simplex virus 1 infection	12.047	1.99998e-39	5.51995e-37	233893	Zfp764
05168	Herpes simplex virus 1 infection	12.047	1.99998e-39	5.51995e-37	235047	Zfp809
05168	Herpes simplex virus 1 infection	12.047	1.99998e-39	5.51995e-37	240064	Zfp799
05168	Herpes simplex virus 1 infection	12.047	1.99998e-39	5.51995e-37	240066	Zfp870
05168	Herpes simplex virus 1 infection	12.047	1.99998e-39	5.51995e-37	24132	Zfp53
05168	Herpes simplex virus 1 infection	12.047	1.99998e-39	5.51995e-37	242747	Zfp933
05168	Herpes simplex virus 1 infection	12.047	1.99998e-39	5.51995e-37	243833	Zfp128
05168	Herpes simplex virus 1 infection	12.047	1.99998e-39	5.51995e-37	27081	Zfp275
05168	Herpes simplex virus 1 infection	12.047	1.99998e-39	5.51995e-37	330788	Zfp866
05168	Herpes simplex virus 1 infection	12.047	1.99998e-39	5.51995e-37	380855	Rsl1
05168	Herpes simplex virus 1 infection	12.047	1.99998e-39	5.51995e-37	408065	Zfp456
05168	Herpes simplex virus 1 infection	12.047	1.99998e-39	5.51995e-37	434377	Zfp560
05168	Herpes simplex virus 1 infection	12.047	1.99998e-39	5.51995e-37	56314	Zfp113
05168	Herpes simplex virus 1 infection	12.047	1.99998e-39	5.51995e-37	56525	Zfp235
05168	Herpes simplex virus 1 infection	12.047	1.99998e-39	5.51995e-37	67911	Zfp169
05168	Herpes simplex virus 1 infection	12.047	1.99998e-39	5.51995e-37	69020	Zfp707
05168	Herpes simplex virus 1 infection	12.047	1.99998e-39	5.51995e-37	71131	Zfp689
05168	Herpes simplex virus 1 infection	12.047	1.99998e-39	5.51995e-37	71640	Zfp949
05168	Herpes simplex virus 1 infection	12.047	1.99998e-39	5.51995e-37	73430	Zfp974
05168	Herpes simplex virus 1 infection	12.047	1.99998e-39	5.51995e-37	78251	Zfp712
05168	Herpes simplex virus 1 infection	12.047	1.99998e-39	5.51995e-37	78921	9130019O22Rik
05168	Herpes simplex virus 1 infection	12.047	1.99998e-39	5.51995e-37	67933	Hcfc2
05168	Herpes simplex virus 1 infection	12.047	1.99998e-39	5.51995e-37	56480	Tbk1
05168	Herpes simplex virus 1 infection	12.047	1.99998e-39	5.51995e-37	58235	Nectin1
05168	Herpes simplex virus 1 infection	12.047	1.99998e-39	5.51995e-37	142980	Tlr3
05168	Herpes simplex virus 1 infection	12.047	1.99998e-39	5.51995e-37	71586	Ifih1
05168	Herpes simplex virus 1 infection	12.047	1.99998e-39	5.51995e-37	19106	Eif2ak2
05168	Herpes simplex virus 1 infection	12.047	1.99998e-39	5.51995e-37	230073	Ddx58
05168	Herpes simplex virus 1 infection	12.047	1.99998e-39	5.51995e-37	228607	Mavs
05168	Herpes simplex virus 1 infection	12.047	1.99998e-39	5.51995e-37	246728	Oas2
05168	Herpes simplex virus 1 infection	12.047	1.99998e-39	5.51995e-37	20847	Stat2
01100	Metabolic pathways	3.17875	1.60621e-11	2.21657e-09	108150	Galnt7
01100	Metabolic pathways	3.17875	1.60621e-11	2.21657e-09	20442	St3gal1
01100	Metabolic pathways	3.17875	1.60621e-11	2.21657e-09	20250	Scd2
01100	Metabolic pathways	3.17875	1.60621e-11	2.21657e-09	54486	Hpgds
01100	Metabolic pathways	3.17875	1.60621e-11	2.21657e-09	269180	Inpp4a
01100	Metabolic pathways	3.17875	1.60621e-11	2.21657e-09	67292	Pigc
01100	Metabolic pathways	3.17875	1.60621e-11	2.21657e-09	56386	B4galt6
01100	Metabolic pathways	3.17875	1.60621e-11	2.21657e-09	102580	Alg9
01100	Metabolic pathways	3.17875	1.60621e-11	2.21657e-09	110119	Mpi
01100	Metabolic pathways	3.17875	1.60621e-11	2.21657e-09	17423	Ndst2
01100	Metabolic pathways	3.17875	1.60621e-11	2.21657e-09	75320	Etnk1
01100	Metabolic pathways	3.17875	1.60621e-11	2.21657e-09	229905	Kyat3
01100	Metabolic pathways	3.17875	1.60621e-11	2.21657e-09	217734	Pomt2
01100	Metabolic pathways	3.17875	1.60621e-11	2.21657e-09	246179	Fktn
01100	Metabolic pathways	3.17875	1.60621e-11	2.21657e-09	68801	Elovl5
01100	Metabolic pathways	3.17875	1.60621e-11	2.21657e-09	67041	Oxct1
01100	Metabolic pathways	3.17875	1.60621e-11	2.21657e-09	70974	Pgm2l1
01100	Metabolic pathways	3.17875	1.60621e-11	2.21657e-09	66789	Alg14
01100	Metabolic pathways	3.17875	1.60621e-11	2.21657e-09	69718	Ipmk
01100	Metabolic pathways	3.17875	1.60621e-11	2.21657e-09	11655	Alas1
01100	Metabolic pathways	3.17875	1.60621e-11	2.21657e-09	67417	Ears2
01100	Metabolic pathways	3.17875	1.60621e-11	2.21657e-09	394430	Ugt1a10
01100	Metabolic pathways	3.17875	1.60621e-11	2.21657e-09	13178	Dck
01100	Metabolic pathways	3.17875	1.60621e-11	2.21657e-09	18583	Pde7a
01100	Metabolic pathways	3.17875	1.60621e-11	2.21657e-09	11514	Adcy8
01100	Metabolic pathways	3.17875	1.60621e-11	2.21657e-09	12499	Entpd5
01100	Metabolic pathways	3.17875	1.60621e-11	2.21657e-09	18160	Npr1
01100	Metabolic pathways	3.17875	1.60621e-11	2.21657e-09	80733	Car15
01100	Metabolic pathways	3.17875	1.60621e-11	2.21657e-09	56351	Ptges3
01100	Metabolic pathways	3.17875	1.60621e-11	2.21657e-09	12494	Cd38
01100	Metabolic pathways	3.17875	1.60621e-11	2.21657e-09	18451	P4ha1
01100	Metabolic pathways	3.17875	1.60621e-11	2.21657e-09	18822	Plod1
01100	Metabolic pathways	3.17875	1.60621e-11	2.21657e-09	53618	Fut8
01100	Metabolic pathways	3.17875	1.60621e-11	2.21657e-09	107895	Mgat5
01100	Metabolic pathways	3.17875	1.60621e-11	2.21657e-09	226139	Cox15
01100	Metabolic pathways	3.17875	1.60621e-11	2.21657e-09	99712	Cept1
01100	Metabolic pathways	3.17875	1.60621e-11	2.21657e-09	55981	Pigb
01100	Metabolic pathways	3.17875	1.60621e-11	2.21657e-09	19378	Aldh1a2
01100	Metabolic pathways	3.17875	1.60621e-11	2.21657e-09	15587	Hyal2
01100	Metabolic pathways	3.17875	1.60621e-11	2.21657e-09	319625	Galm
01100	Metabolic pathways	3.17875	1.60621e-11	2.21657e-09	14593	Ggps1
01100	Metabolic pathways	3.17875	1.60621e-11	2.21657e-09	78928	Pigt
01100	Metabolic pathways	3.17875	1.60621e-11	2.21657e-09	52665	Echdc1
01100	Metabolic pathways	3.17875	1.60621e-11	2.21657e-09	14431	Gamt
01100	Metabolic pathways	3.17875	1.60621e-11	2.21657e-09	244209	Cyp2r1
01100	Metabolic pathways	3.17875	1.60621e-11	2.21657e-09	218865	Chdh
01100	Metabolic pathways	3.17875	1.60621e-11	2.21657e-09	11886	Asah1
01100	Metabolic pathways	3.17875	1.60621e-11	2.21657e-09	99010	Lpcat4
04060	Cytokine-cytokine receptor interaction	6.75077	4.27577e-10	3.9337e-08	12145	Cxcr5
04060	Cytokine-cytokine receptor interaction	6.75077	4.27577e-10	3.9337e-08	16162	Il12rb2
04060	Cytokine-cytokine receptor interaction	6.75077	4.27577e-10	3.9337e-08	12771	Ccr3
04060	Cytokine-cytokine receptor interaction	6.75077	4.27577e-10	3.9337e-08	16199	Il9r
04060	Cytokine-cytokine receptor interaction	6.75077	4.27577e-10	3.9337e-08	12774	Ccr5
04060	Cytokine-cytokine receptor interaction	6.75077	4.27577e-10	3.9337e-08	242700	Ifnlr1
04060	Cytokine-cytokine receptor interaction	6.75077	4.27577e-10	3.9337e-08	56744	Pf4
04060	Cytokine-cytokine receptor interaction	6.75077	4.27577e-10	3.9337e-08	50905	Il17rb
04060	Cytokine-cytokine receptor interaction	6.75077	4.27577e-10	3.9337e-08	16197	Il7r
04060	Cytokine-cytokine receptor interaction	6.75077	4.27577e-10	3.9337e-08	14561	Gdf11
04060	Cytokine-cytokine receptor interaction	6.75077	4.27577e-10	3.9337e-08	12168	Bmpr2
04060	Cytokine-cytokine receptor interaction	6.75077	4.27577e-10	3.9337e-08	16185	Il2rb
04060	Cytokine-cytokine receptor interaction	6.75077	4.27577e-10	3.9337e-08	12773	Ccr4
04060	Cytokine-cytokine receptor interaction	6.75077	4.27577e-10	3.9337e-08	21949	Tnfsf8
04060	Cytokine-cytokine receptor interaction	6.75077	4.27577e-10	3.9337e-08	16323	Inhba
04060	Cytokine-cytokine receptor interaction	6.75077	4.27577e-10	3.9337e-08	320100	Relt
04060	Cytokine-cytokine receptor interaction	6.75077	4.27577e-10	3.9337e-08	21950	Tnfsf9
04060	Cytokine-cytokine receptor interaction	6.75077	4.27577e-10	3.9337e-08	16880	Lifr
04060	Cytokine-cytokine receptor interaction	6.75077	4.27577e-10	3.9337e-08	16177	Il1r1
05200	Pathways in cancer	4.60128	4.11948e-09	2.84244e-07	20847	Stat2
05200	Pathways in cancer	4.60128	4.11948e-09	2.84244e-07	235320	Zbtb16
05200	Pathways in cancer	4.60128	4.11948e-09	2.84244e-07	16197	Il7r
05200	Pathways in cancer	4.60128	4.11948e-09	2.84244e-07	19016	Pparg
05200	Pathways in cancer	4.60128	4.11948e-09	2.84244e-07	16185	Il2rb
05200	Pathways in cancer	4.60128	4.11948e-09	2.84244e-07	20181	Rxra
05200	Pathways in cancer	4.60128	4.11948e-09	2.84244e-07	12444	Ccnd2
05200	Pathways in cancer	4.60128	4.11948e-09	2.84244e-07	13017	Ctbp2
05200	Pathways in cancer	4.60128	4.11948e-09	2.84244e-07	27401	Skp2
05200	Pathways in cancer	4.60128	4.11948e-09	2.84244e-07	381810	Lpar5
05200	Pathways in cancer	4.60128	4.11948e-09	2.84244e-07	14682	Gnaq
05200	Pathways in cancer	4.60128	4.11948e-09	2.84244e-07	13388	Dll1
05200	Pathways in cancer	4.60128	4.11948e-09	2.84244e-07	11514	Adcy8
05200	Pathways in cancer	4.60128	4.11948e-09	2.84244e-07	14672	Gna11
05200	Pathways in cancer	4.60128	4.11948e-09	2.84244e-07	18595	Pdgfra
05200	Pathways in cancer	4.60128	4.11948e-09	2.84244e-07	16774	Lama3
05200	Pathways in cancer	4.60128	4.11948e-09	2.84244e-07	16162	Il12rb2
05200	Pathways in cancer	4.60128	4.11948e-09	2.84244e-07	12394	Runx1
05200	Pathways in cancer	4.60128	4.11948e-09	2.84244e-07	18708	Pik3r1
05200	Pathways in cancer	4.60128	4.11948e-09	2.84244e-07	16000	Igf1
05200	Pathways in cancer	4.60128	4.11948e-09	2.84244e-07	226519	Lamc1
05200	Pathways in cancer	4.60128	4.11948e-09	2.84244e-07	67168	Lpar6
05200	Pathways in cancer	4.60128	4.11948e-09	2.84244e-07	15516	Hsp90ab1
05200	Pathways in cancer	4.60128	4.11948e-09	2.84244e-07	76551	Ccdc6
04015	Rap1 signaling pathway	6.81054	1.08056e-07	5.9647e-06	14682	Gnaq
04015	Rap1 signaling pathway	6.81054	1.08056e-07	5.9647e-06	93742	Pard3
04015	Rap1 signaling pathway	6.81054	1.08056e-07	5.9647e-06	381810	Lpar5
04015	Rap1 signaling pathway	6.81054	1.08056e-07	5.9647e-06	238130	Dock4
04015	Rap1 signaling pathway	6.81054	1.08056e-07	5.9647e-06	18708	Pik3r1
04015	Rap1 signaling pathway	6.81054	1.08056e-07	5.9647e-06	227377	Farp2
04015	Rap1 signaling pathway	6.81054	1.08056e-07	5.9647e-06	11514	Adcy8
04015	Rap1 signaling pathway	6.81054	1.08056e-07	5.9647e-06	16797	Lat
04015	Rap1 signaling pathway	6.81054	1.08056e-07	5.9647e-06	18759	Prkci
04015	Rap1 signaling pathway	6.81054	1.08056e-07	5.9647e-06	16416	Itgb3
04015	Rap1 signaling pathway	6.81054	1.08056e-07	5.9647e-06	14293	Fpr1
04015	Rap1 signaling pathway	6.81054	1.08056e-07	5.9647e-06	26399	Map2k6
04015	Rap1 signaling pathway	6.81054	1.08056e-07	5.9647e-06	16000	Igf1
04015	Rap1 signaling pathway	6.81054	1.08056e-07	5.9647e-06	18595	Pdgfra
05160	Hepatitis C	7.5712	3.33825e-07	1.53559e-05	15957	Ifit1
05160	Hepatitis C	7.5712	3.33825e-07	1.53559e-05	19106	Eif2ak2
05160	Hepatitis C	7.5712	3.33825e-07	1.53559e-05	228607	Mavs
05160	Hepatitis C	7.5712	3.33825e-07	1.53559e-05	56480	Tbk1
05160	Hepatitis C	7.5712	3.33825e-07	1.53559e-05	18708	Pik3r1
05160	Hepatitis C	7.5712	3.33825e-07	1.53559e-05	667373	Ifit1bl1
05160	Hepatitis C	7.5712	3.33825e-07	1.53559e-05	246728	Oas2
05160	Hepatitis C	7.5712	3.33825e-07	1.53559e-05	12633	Cflar
05160	Hepatitis C	7.5712	3.33825e-07	1.53559e-05	142980	Tlr3
05160	Hepatitis C	7.5712	3.33825e-07	1.53559e-05	230073	Ddx58
05160	Hepatitis C	7.5712	3.33825e-07	1.53559e-05	20181	Rxra
05160	Hepatitis C	7.5712	3.33825e-07	1.53559e-05	20847	Stat2
04630	JAK-STAT signaling pathway	7.392	4.34069e-07	1.71147e-05	18595	Pdgfra
04630	JAK-STAT signaling pathway	7.392	4.34069e-07	1.71147e-05	242700	Ifnlr1
04630	JAK-STAT signaling pathway	7.392	4.34069e-07	1.71147e-05	16880	Lifr
04630	JAK-STAT signaling pathway	7.392	4.34069e-07	1.71147e-05	216233	Socs2
04630	JAK-STAT signaling pathway	7.392	4.34069e-07	1.71147e-05	12444	Ccnd2
04630	JAK-STAT signaling pathway	7.392	4.34069e-07	1.71147e-05	67296	Socs4
04630	JAK-STAT signaling pathway	7.392	4.34069e-07	1.71147e-05	18708	Pik3r1
04630	JAK-STAT signaling pathway	7.392	4.34069e-07	1.71147e-05	16199	Il9r
04630	JAK-STAT signaling pathway	7.392	4.34069e-07	1.71147e-05	16162	Il12rb2
04630	JAK-STAT signaling pathway	7.392	4.34069e-07	1.71147e-05	16185	Il2rb
04630	JAK-STAT signaling pathway	7.392	4.34069e-07	1.71147e-05	16197	Il7r
04630	JAK-STAT signaling pathway	7.392	4.34069e-07	1.71147e-05	20847	Stat2
04141	Protein processing in endoplasmic reticulum	7.26307	5.26056e-07	1.81489e-05	15516	Hsp90ab1
04141	Protein processing in endoplasmic reticulum	7.26307	5.26056e-07	1.81489e-05	15505	Hsph1
04141	Protein processing in endoplasmic reticulum	7.26307	5.26056e-07	1.81489e-05	216197	Ckap4
04141	Protein processing in endoplasmic reticulum	7.26307	5.26056e-07	1.81489e-05	20338	Sel1l
04141	Protein processing in endoplasmic reticulum	7.26307	5.26056e-07	1.81489e-05	18415	Hspa4l
04141	Protein processing in endoplasmic reticulum	7.26307	5.26056e-07	1.81489e-05	218811	Sec24c
04141	Protein processing in endoplasmic reticulum	7.26307	5.26056e-07	1.81489e-05	56085	Ubqln1
04141	Protein processing in endoplasmic reticulum	7.26307	5.26056e-07	1.81489e-05	94232	Ubqln4
04141	Protein processing in endoplasmic reticulum	7.26307	5.26056e-07	1.81489e-05	15481	Hspa8
04141	Protein processing in endoplasmic reticulum	7.26307	5.26056e-07	1.81489e-05	70361	Lman1
04141	Protein processing in endoplasmic reticulum	7.26307	5.26056e-07	1.81489e-05	226418	Yod1
04141	Protein processing in endoplasmic reticulum	7.26307	5.26056e-07	1.81489e-05	19106	Eif2ak2
05162	Measles	7.84345	8.06177e-07	2.47228e-05	230073	Ddx58
05162	Measles	7.84345	8.06177e-07	2.47228e-05	20847	Stat2
05162	Measles	7.84345	8.06177e-07	2.47228e-05	228607	Mavs
05162	Measles	7.84345	8.06177e-07	2.47228e-05	16185	Il2rb
05162	Measles	7.84345	8.06177e-07	2.47228e-05	71586	Ifih1
05162	Measles	7.84345	8.06177e-07	2.47228e-05	18708	Pik3r1
05162	Measles	7.84345	8.06177e-07	2.47228e-05	19106	Eif2ak2
05162	Measles	7.84345	8.06177e-07	2.47228e-05	246728	Oas2
05162	Measles	7.84345	8.06177e-07	2.47228e-05	56480	Tbk1
05162	Measles	7.84345	8.06177e-07	2.47228e-05	12444	Ccnd2
05162	Measles	7.84345	8.06177e-07	2.47228e-05	15481	Hspa8
05169	Epstein-Barr virus infection	5.85867	1.9093e-06	5.1469e-05	27401	Skp2
05169	Epstein-Barr virus infection	5.85867	1.9093e-06	5.1469e-05	26399	Map2k6
05169	Epstein-Barr virus infection	5.85867	1.9093e-06	5.1469e-05	230073	Ddx58
05169	Epstein-Barr virus infection	5.85867	1.9093e-06	5.1469e-05	56480	Tbk1
05169	Epstein-Barr virus infection	5.85867	1.9093e-06	5.1469e-05	18708	Pik3r1
05169	Epstein-Barr virus infection	5.85867	1.9093e-06	5.1469e-05	20847	Stat2
05169	Epstein-Barr virus infection	5.85867	1.9093e-06	5.1469e-05	12010	B2m
05169	Epstein-Barr virus infection	5.85867	1.9093e-06	5.1469e-05	12902	Cr2
05169	Epstein-Barr virus infection	5.85867	1.9093e-06	5.1469e-05	12444	Ccnd2
05169	Epstein-Barr virus infection	5.85867	1.9093e-06	5.1469e-05	228607	Mavs
05169	Epstein-Barr virus infection	5.85867	1.9093e-06	5.1469e-05	246728	Oas2
05169	Epstein-Barr virus infection	5.85867	1.9093e-06	5.1469e-05	19106	Eif2ak2
05169	Epstein-Barr virus infection	5.85867	1.9093e-06	5.1469e-05	630294	Gm7030
04144	Endocytosis	5.35829	2.0513e-06	5.1469e-05	16396	Itch
04144	Endocytosis	5.35829	2.0513e-06	5.1469e-05	216439	Agap2
04144	Endocytosis	5.35829	2.0513e-06	5.1469e-05	18595	Pdgfra
04144	Endocytosis	5.35829	2.0513e-06	5.1469e-05	16185	Il2rb
04144	Endocytosis	5.35829	2.0513e-06	5.1469e-05	30930	Vps26a
04144	Endocytosis	5.35829	2.0513e-06	5.1469e-05	630294	Gm7030
04144	Endocytosis	5.35829	2.0513e-06	5.1469e-05	18759	Prkci
04144	Endocytosis	5.35829	2.0513e-06	5.1469e-05	69091	Vps26b
04144	Endocytosis	5.35829	2.0513e-06	5.1469e-05	93742	Pard3
04144	Endocytosis	5.35829	2.0513e-06	5.1469e-05	11842	Arf3
04144	Endocytosis	5.35829	2.0513e-06	5.1469e-05	15481	Hspa8
04144	Endocytosis	5.35829	2.0513e-06	5.1469e-05	12774	Ccr5
04144	Endocytosis	5.35829	2.0513e-06	5.1469e-05	71955	Ist1
04144	Endocytosis	5.35829	2.0513e-06	5.1469e-05	68524	Wipf2
05163	Human cytomegalovirus infection	5.28653	6.04282e-06	0.000138985	14672	Gna11
05163	Human cytomegalovirus infection	5.28653	6.04282e-06	0.000138985	630294	Gm7030
05163	Human cytomegalovirus infection	5.28653	6.04282e-06	0.000138985	18595	Pdgfra
05163	Human cytomegalovirus infection	5.28653	6.04282e-06	0.000138985	56480	Tbk1
05163	Human cytomegalovirus infection	5.28653	6.04282e-06	0.000138985	14682	Gnaq
05163	Human cytomegalovirus infection	5.28653	6.04282e-06	0.000138985	16416	Itgb3
05163	Human cytomegalovirus infection	5.28653	6.04282e-06	0.000138985	18708	Pik3r1
05163	Human cytomegalovirus infection	5.28653	6.04282e-06	0.000138985	12010	B2m
05163	Human cytomegalovirus infection	5.28653	6.04282e-06	0.000138985	11514	Adcy8
05163	Human cytomegalovirus infection	5.28653	6.04282e-06	0.000138985	16177	Il1r1
05163	Human cytomegalovirus infection	5.28653	6.04282e-06	0.000138985	12771	Ccr3
05163	Human cytomegalovirus infection	5.28653	6.04282e-06	0.000138985	12774	Ccr5
05163	Human cytomegalovirus infection	5.28653	6.04282e-06	0.000138985	26399	Map2k6
04621	NOD-like receptor signaling pathway	5.42722	2.98333e-05	0.000618332	14468	Gbp2b
04621	NOD-like receptor signaling pathway	5.42722	2.98333e-05	0.000618332	229898	Gbp5
04621	NOD-like receptor signaling pathway	5.42722	2.98333e-05	0.000618332	20847	Stat2
04621	NOD-like receptor signaling pathway	5.42722	2.98333e-05	0.000618332	18439	P2rx7
04621	NOD-like receptor signaling pathway	5.42722	2.98333e-05	0.000618332	15516	Hsp90ab1
04621	NOD-like receptor signaling pathway	5.42722	2.98333e-05	0.000618332	246728	Oas2
04621	NOD-like receptor signaling pathway	5.42722	2.98333e-05	0.000618332	56480	Tbk1
04621	NOD-like receptor signaling pathway	5.42722	2.98333e-05	0.000618332	228607	Mavs
04621	NOD-like receptor signaling pathway	5.42722	2.98333e-05	0.000618332	239319	Card6
04621	NOD-like receptor signaling pathway	5.42722	2.98333e-05	0.000618332	226691	Ifi207
04621	NOD-like receptor signaling pathway	5.42722	2.98333e-05	0.000618332	102639543	Ifi206
05164	Influenza A	6.01757	3.13647e-05	0.000618332	230073	Ddx58
05164	Influenza A	6.01757	3.13647e-05	0.000618332	142980	Tlr3
05164	Influenza A	6.01757	3.13647e-05	0.000618332	71586	Ifih1
05164	Influenza A	6.01757	3.13647e-05	0.000618332	228607	Mavs
05164	Influenza A	6.01757	3.13647e-05	0.000618332	17229	Tpsb2
05164	Influenza A	6.01757	3.13647e-05	0.000618332	56480	Tbk1
05164	Influenza A	6.01757	3.13647e-05	0.000618332	20847	Stat2
05164	Influenza A	6.01757	3.13647e-05	0.000618332	18708	Pik3r1
05164	Influenza A	6.01757	3.13647e-05	0.000618332	19106	Eif2ak2
05164	Influenza A	6.01757	3.13647e-05	0.000618332	246728	Oas2
05146	Amoebiasis	7.78348	3.94024e-05	0.000725005	20723	Serpinb9
05146	Amoebiasis	7.78348	3.94024e-05	0.000725005	18708	Pik3r1
05146	Amoebiasis	7.78348	3.94024e-05	0.000725005	14672	Gna11
05146	Amoebiasis	7.78348	3.94024e-05	0.000725005	14682	Gnaq
05146	Amoebiasis	7.78348	3.94024e-05	0.000725005	15507	Hspb1
05146	Amoebiasis	7.78348	3.94024e-05	0.000725005	16177	Il1r1
05146	Amoebiasis	7.78348	3.94024e-05	0.000725005	16774	Lama3
05146	Amoebiasis	7.78348	3.94024e-05	0.000725005	226519	Lamc1
05145	Toxoplasmosis	7.5712	4.82961e-05	0.00082325	15944	Irgm1
05145	Toxoplasmosis	7.5712	4.82961e-05	0.00082325	54396	Irgm2
05145	Toxoplasmosis	7.5712	4.82961e-05	0.00082325	26399	Map2k6
05145	Toxoplasmosis	7.5712	4.82961e-05	0.00082325	12774	Ccr5
05145	Toxoplasmosis	7.5712	4.82961e-05	0.00082325	226519	Lamc1
05145	Toxoplasmosis	7.5712	4.82961e-05	0.00082325	15481	Hspa8
05145	Toxoplasmosis	7.5712	4.82961e-05	0.00082325	16774	Lama3
05145	Toxoplasmosis	7.5712	4.82961e-05	0.00082325	16145	Igtp
04151	PI3K-Akt signaling pathway	4.05977	5.07631e-05	0.00082325	16197	Il7r
04151	PI3K-Akt signaling pathway	4.05977	5.07631e-05	0.00082325	226519	Lamc1
04151	PI3K-Akt signaling pathway	4.05977	5.07631e-05	0.00082325	16185	Il2rb
04151	PI3K-Akt signaling pathway	4.05977	5.07631e-05	0.00082325	20181	Rxra
04151	PI3K-Akt signaling pathway	4.05977	5.07631e-05	0.00082325	12444	Ccnd2
04151	PI3K-Akt signaling pathway	4.05977	5.07631e-05	0.00082325	16774	Lama3
04151	PI3K-Akt signaling pathway	4.05977	5.07631e-05	0.00082325	74747	Ddit4
04151	PI3K-Akt signaling pathway	4.05977	5.07631e-05	0.00082325	16000	Igf1
04151	PI3K-Akt signaling pathway	4.05977	5.07631e-05	0.00082325	381810	Lpar5
04151	PI3K-Akt signaling pathway	4.05977	5.07631e-05	0.00082325	16416	Itgb3
04151	PI3K-Akt signaling pathway	4.05977	5.07631e-05	0.00082325	18708	Pik3r1
04151	PI3K-Akt signaling pathway	4.05977	5.07631e-05	0.00082325	15516	Hsp90ab1
04151	PI3K-Akt signaling pathway	4.05977	5.07631e-05	0.00082325	67168	Lpar6
04151	PI3K-Akt signaling pathway	4.05977	5.07631e-05	0.00082325	18595	Pdgfra
04330	Notch signaling pathway	11.5671	5.36902e-05	0.00082325	13017	Ctbp2
04330	Notch signaling pathway	11.5671	5.36902e-05	0.00082325	14357	Dtx1
04330	Notch signaling pathway	11.5671	5.36902e-05	0.00082325	20238	Atxn1
04330	Notch signaling pathway	11.5671	5.36902e-05	0.00082325	208117	Aph1b
04330	Notch signaling pathway	11.5671	5.36902e-05	0.00082325	13388	Dll1
04330	Notch signaling pathway	11.5671	5.36902e-05	0.00082325	209200	Dtx3l
04062	Chemokine signaling pathway	5.42208	7.76373e-05	0.00112778	11514	Adcy8
04062	Chemokine signaling pathway	5.42208	7.76373e-05	0.00112778	18708	Pik3r1
04062	Chemokine signaling pathway	5.42208	7.76373e-05	0.00112778	93742	Pard3
04062	Chemokine signaling pathway	5.42208	7.76373e-05	0.00112778	20847	Stat2
04062	Chemokine signaling pathway	5.42208	7.76373e-05	0.00112778	56744	Pf4
04062	Chemokine signaling pathway	5.42208	7.76373e-05	0.00112778	12771	Ccr3
04062	Chemokine signaling pathway	5.42208	7.76373e-05	0.00112778	12773	Ccr4
04062	Chemokine signaling pathway	5.42208	7.76373e-05	0.00112778	12145	Cxcr5
04062	Chemokine signaling pathway	5.42208	7.76373e-05	0.00112778	12774	Ccr5
04062	Chemokine signaling pathway	5.42208	7.76373e-05	0.00112778	14682	Gnaq
05161	Hepatitis B	5.74807	0.000127423	0.00169262	117149	Tirap
05161	Hepatitis B	5.74807	0.000127423	0.00169262	71586	Ifih1
05161	Hepatitis B	5.74807	0.000127423	0.00169262	56480	Tbk1
05161	Hepatitis B	5.74807	0.000127423	0.00169262	26399	Map2k6
05161	Hepatitis B	5.74807	0.000127423	0.00169262	20847	Stat2
05161	Hepatitis B	5.74807	0.000127423	0.00169262	228607	Mavs
05161	Hepatitis B	5.74807	0.000127423	0.00169262	18708	Pik3r1
05161	Hepatitis B	5.74807	0.000127423	0.00169262	230073	Ddx58
05161	Hepatitis B	5.74807	0.000127423	0.00169262	142980	Tlr3
05171	Coronavirus disease - COVID-19?New!	4.63621	0.000128787	0.00169262	20847	Stat2
05171	Coronavirus disease - COVID-19?New!	4.63621	0.000128787	0.00169262	12274	C6
05171	Coronavirus disease - COVID-19?New!	4.63621	0.000128787	0.00169262	56480	Tbk1
05171	Coronavirus disease - COVID-19?New!	4.63621	0.000128787	0.00169262	246728	Oas2
05171	Coronavirus disease - COVID-19?New!	4.63621	0.000128787	0.00169262	71586	Ifih1
05171	Coronavirus disease - COVID-19?New!	4.63621	0.000128787	0.00169262	19106	Eif2ak2
05171	Coronavirus disease - COVID-19?New!	4.63621	0.000128787	0.00169262	170744	Tlr8
05171	Coronavirus disease - COVID-19?New!	4.63621	0.000128787	0.00169262	230073	Ddx58
05171	Coronavirus disease - COVID-19?New!	4.63621	0.000128787	0.00169262	18708	Pik3r1
05171	Coronavirus disease - COVID-19?New!	4.63621	0.000128787	0.00169262	142980	Tlr3
05171	Coronavirus disease - COVID-19?New!	4.63621	0.000128787	0.00169262	228607	Mavs
04380	Osteoclast differentiation	6.5065	0.000144933	0.00181825	18708	Pik3r1
04380	Osteoclast differentiation	6.5065	0.000144933	0.00181825	16177	Il1r1
04380	Osteoclast differentiation	6.5065	0.000144933	0.00181825	100041146	Gm15448
04380	Osteoclast differentiation	6.5065	0.000144933	0.00181825	20847	Stat2
04380	Osteoclast differentiation	6.5065	0.000144933	0.00181825	16416	Itgb3
04380	Osteoclast differentiation	6.5065	0.000144933	0.00181825	19016	Pparg
04380	Osteoclast differentiation	6.5065	0.000144933	0.00181825	26399	Map2k6
04380	Osteoclast differentiation	6.5065	0.000144933	0.00181825	14131	Fcgr3
04620	Toll-like receptor signaling pathway	7.28728	0.000216602	0.00259923	117149	Tirap
04620	Toll-like receptor signaling pathway	7.28728	0.000216602	0.00259923	170744	Tlr8
04620	Toll-like receptor signaling pathway	7.28728	0.000216602	0.00259923	16803	Lbp
04620	Toll-like receptor signaling pathway	7.28728	0.000216602	0.00259923	26399	Map2k6
04620	Toll-like receptor signaling pathway	7.28728	0.000216602	0.00259923	142980	Tlr3
04620	Toll-like receptor signaling pathway	7.28728	0.000216602	0.00259923	56480	Tbk1
04620	Toll-like receptor signaling pathway	7.28728	0.000216602	0.00259923	18708	Pik3r1
05165	Human papillomavirus infection	3.73854	0.000238369	0.00274124	93742	Pard3
05165	Human papillomavirus infection	3.73854	0.000238369	0.00274124	19106	Eif2ak2
05165	Human papillomavirus infection	3.73854	0.000238369	0.00274124	226519	Lamc1
05165	Human papillomavirus infection	3.73854	0.000238369	0.00274124	20847	Stat2
05165	Human papillomavirus infection	3.73854	0.000238369	0.00274124	16416	Itgb3
05165	Human papillomavirus infection	3.73854	0.000238369	0.00274124	18759	Prkci
05165	Human papillomavirus infection	3.73854	0.000238369	0.00274124	142980	Tlr3
05165	Human papillomavirus infection	3.73854	0.000238369	0.00274124	217325	Llgl2
05165	Human papillomavirus infection	3.73854	0.000238369	0.00274124	12444	Ccnd2
05165	Human papillomavirus infection	3.73854	0.000238369	0.00274124	630294	Gm7030
05165	Human papillomavirus infection	3.73854	0.000238369	0.00274124	18708	Pik3r1
05165	Human papillomavirus infection	3.73854	0.000238369	0.00274124	16774	Lama3
05165	Human papillomavirus infection	3.73854	0.000238369	0.00274124	56480	Tbk1
05202	Transcriptional misregulation in cancer	4.66834	0.000275362	0.00282226	19016	Pparg
05202	Transcriptional misregulation in cancer	4.66834	0.000275362	0.00282226	235320	Zbtb16
05202	Transcriptional misregulation in cancer	4.66834	0.000275362	0.00282226	12394	Runx1
05202	Transcriptional misregulation in cancer	4.66834	0.000275362	0.00282226	16185	Il2rb
05202	Transcriptional misregulation in cancer	4.66834	0.000275362	0.00282226	16000	Igf1
05202	Transcriptional misregulation in cancer	4.66834	0.000275362	0.00282226	53618	Fut8
05202	Transcriptional misregulation in cancer	4.66834	0.000275362	0.00282226	15446	Hpgd
05202	Transcriptional misregulation in cancer	4.66834	0.000275362	0.00282226	20181	Rxra
05202	Transcriptional misregulation in cancer	4.66834	0.000275362	0.00282226	17132	Maf
05202	Transcriptional misregulation in cancer	4.66834	0.000275362	0.00282226	12444	Ccnd2
04659	Th17 cell differentiation	7.007	0.000278114	0.00282226	12394	Runx1
04659	Th17 cell differentiation	7.007	0.000278114	0.00282226	16185	Il2rb
04659	Th17 cell differentiation	7.007	0.000278114	0.00282226	20181	Rxra
04659	Th17 cell differentiation	7.007	0.000278114	0.00282226	16797	Lat
04659	Th17 cell differentiation	7.007	0.000278114	0.00282226	57765	Tbx21
04659	Th17 cell differentiation	7.007	0.000278114	0.00282226	15516	Hsp90ab1
04659	Th17 cell differentiation	7.007	0.000278114	0.00282226	16177	Il1r1
04360	Axon guidance	5.17644	0.000287376	0.00282226	16728	L1cam
04360	Axon guidance	5.17644	0.000287376	0.00282226	18708	Pik3r1
04360	Axon guidance	5.17644	0.000287376	0.00282226	18845	Plxna2
04360	Axon guidance	5.17644	0.000287376	0.00282226	13838	Epha4
04360	Axon guidance	5.17644	0.000287376	0.00282226	117606	Boc
04360	Axon guidance	5.17644	0.000287376	0.00282226	214968	Sema6d
04360	Axon guidance	5.17644	0.000287376	0.00282226	20358	Sema6a
04360	Axon guidance	5.17644	0.000287376	0.00282226	12168	Bmpr2
04360	Axon guidance	5.17644	0.000287376	0.00282226	93742	Pard3
04064	NF-kappa B signaling pathway	6.94027	0.000295532	0.00282226	22329	Vcam1
04064	NF-kappa B signaling pathway	6.94027	0.000295532	0.00282226	12633	Cflar
04064	NF-kappa B signaling pathway	6.94027	0.000295532	0.00282226	16797	Lat
04064	NF-kappa B signaling pathway	6.94027	0.000295532	0.00282226	16803	Lbp
04064	NF-kappa B signaling pathway	6.94027	0.000295532	0.00282226	117149	Tirap
04064	NF-kappa B signaling pathway	6.94027	0.000295532	0.00282226	230073	Ddx58
04064	NF-kappa B signaling pathway	6.94027	0.000295532	0.00282226	16177	Il1r1
05167	Kaposi sarcoma-associated herpesvirus infection	4.62684	0.000296541	0.00282226	142980	Tlr3
05167	Kaposi sarcoma-associated herpesvirus infection	4.62684	0.000296541	0.00282226	26399	Map2k6
05167	Kaposi sarcoma-associated herpesvirus infection	4.62684	0.000296541	0.00282226	630294	Gm7030
05167	Kaposi sarcoma-associated herpesvirus infection	4.62684	0.000296541	0.00282226	12771	Ccr3
05167	Kaposi sarcoma-associated herpesvirus infection	4.62684	0.000296541	0.00282226	56480	Tbk1
05167	Kaposi sarcoma-associated herpesvirus infection	4.62684	0.000296541	0.00282226	18708	Pik3r1
05167	Kaposi sarcoma-associated herpesvirus infection	4.62684	0.000296541	0.00282226	19106	Eif2ak2
05167	Kaposi sarcoma-associated herpesvirus infection	4.62684	0.000296541	0.00282226	12773	Ccr4
05167	Kaposi sarcoma-associated herpesvirus infection	4.62684	0.000296541	0.00282226	20847	Stat2
05167	Kaposi sarcoma-associated herpesvirus infection	4.62684	0.000296541	0.00282226	12774	Ccr5
04979	Cholesterol metabolism	10.6229	0.000433659	0.00398966	218203	Mylip
04979	Cholesterol metabolism	10.6229	0.000433659	0.00398966	11816	Apoe
04979	Cholesterol metabolism	10.6229	0.000433659	0.00398966	20652	Soat1
04979	Cholesterol metabolism	10.6229	0.000433659	0.00398966	79196	Osbpl5
04979	Cholesterol metabolism	10.6229	0.000433659	0.00398966	11303	Abca1
04935	Growth hormone synthesis, secretion and action	6.28214	0.000552944	0.00492299	14682	Gnaq
04935	Growth hormone synthesis, secretion and action	6.28214	0.000552944	0.00492299	18708	Pik3r1
04935	Growth hormone synthesis, secretion and action	6.28214	0.000552944	0.00492299	11514	Adcy8
04935	Growth hormone synthesis, secretion and action	6.28214	0.000552944	0.00492299	16000	Igf1
04935	Growth hormone synthesis, secretion and action	6.28214	0.000552944	0.00492299	216233	Socs2
04935	Growth hormone synthesis, secretion and action	6.28214	0.000552944	0.00492299	26399	Map2k6
04935	Growth hormone synthesis, secretion and action	6.28214	0.000552944	0.00492299	14672	Gna11
04010	MAPK signaling pathway	3.89505	0.000606635	0.00523223	16000	Igf1
04010	MAPK signaling pathway	3.89505	0.000606635	0.00523223	110651	Rps6ka3
04010	MAPK signaling pathway	3.89505	0.000606635	0.00523223	12286	Cacna1a
04010	MAPK signaling pathway	3.89505	0.000606635	0.00523223	235584	Dusp7
04010	MAPK signaling pathway	3.89505	0.000606635	0.00523223	15507	Hspb1
04010	MAPK signaling pathway	3.89505	0.000606635	0.00523223	16177	Il1r1
04010	MAPK signaling pathway	3.89505	0.000606635	0.00523223	18595	Pdgfra
04010	MAPK signaling pathway	3.89505	0.000606635	0.00523223	15481	Hspa8
04010	MAPK signaling pathway	3.89505	0.000606635	0.00523223	381921	Taok2
04010	MAPK signaling pathway	3.89505	0.000606635	0.00523223	53608	Map3k6
04010	MAPK signaling pathway	3.89505	0.000606635	0.00523223	26399	Map2k6
04923	Regulation of lipolysis in adipocytes	9.295	0.000821988	0.00687481	11514	Adcy8
04923	Regulation of lipolysis in adipocytes	9.295	0.000821988	0.00687481	11554	Adrb1
04923	Regulation of lipolysis in adipocytes	9.295	0.000821988	0.00687481	18160	Npr1
04923	Regulation of lipolysis in adipocytes	9.295	0.000821988	0.00687481	18708	Pik3r1
04923	Regulation of lipolysis in adipocytes	9.295	0.000821988	0.00687481	109648	Npy
04658	Th1 and Th2 cell differentiation	7.098	0.000855151	0.00694181	16797	Lat
04658	Th1 and Th2 cell differentiation	7.098	0.000855151	0.00694181	17132	Maf
04658	Th1 and Th2 cell differentiation	7.098	0.000855151	0.00694181	13388	Dll1
04658	Th1 and Th2 cell differentiation	7.098	0.000855151	0.00694181	57765	Tbx21
04658	Th1 and Th2 cell differentiation	7.098	0.000855151	0.00694181	16162	Il12rb2
04658	Th1 and Th2 cell differentiation	7.098	0.000855151	0.00694181	16185	Il2rb
04750	Inflammatory mediator regulation of TRP channels	5.73802	0.000967944	0.00763293	14682	Gnaq
04750	Inflammatory mediator regulation of TRP channels	5.73802	0.000967944	0.00763293	16000	Igf1
04750	Inflammatory mediator regulation of TRP channels	5.73802	0.000967944	0.00763293	18708	Pik3r1
04750	Inflammatory mediator regulation of TRP channels	5.73802	0.000967944	0.00763293	26399	Map2k6
04750	Inflammatory mediator regulation of TRP channels	5.73802	0.000967944	0.00763293	16177	Il1r1
04750	Inflammatory mediator regulation of TRP channels	5.73802	0.000967944	0.00763293	14063	F2rl1
04750	Inflammatory mediator regulation of TRP channels	5.73802	0.000967944	0.00763293	11514	Adcy8
03410	Base excision repair	12.2475	0.00124543	0.00926196	17193	Mbd4
03410	Base excision repair	12.2475	0.00124543	0.00926196	67967	Pold3
03410	Base excision repair	12.2475	0.00124543	0.00926196	71726	Smug1
03410	Base excision repair	12.2475	0.00124543	0.00926196	235587	Parp3
04061	Viral protein interaction with cytokine and cytokine receptor	6.57499	0.00129603	0.00926196	12773	Ccr4
04061	Viral protein interaction with cytokine and cytokine receptor	6.57499	0.00129603	0.00926196	12774	Ccr5
04061	Viral protein interaction with cytokine and cytokine receptor	6.57499	0.00129603	0.00926196	16185	Il2rb
04061	Viral protein interaction with cytokine and cytokine receptor	6.57499	0.00129603	0.00926196	56744	Pf4
04061	Viral protein interaction with cytokine and cytokine receptor	6.57499	0.00129603	0.00926196	12145	Cxcr5
04061	Viral protein interaction with cytokine and cytokine receptor	6.57499	0.00129603	0.00926196	12771	Ccr3
04640	Hematopoietic cell lineage	6.57499	0.00129603	0.00926196	16199	Il9r
04640	Hematopoietic cell lineage	6.57499	0.00129603	0.00926196	16416	Itgb3
04640	Hematopoietic cell lineage	6.57499	0.00129603	0.00926196	12902	Cr2
04640	Hematopoietic cell lineage	6.57499	0.00129603	0.00926196	16197	Il7r
04640	Hematopoietic cell lineage	6.57499	0.00129603	0.00926196	16177	Il1r1
04640	Hematopoietic cell lineage	6.57499	0.00129603	0.00926196	12494	Cd38
04213	Longevity regulating pathway - multiple species	8.39548	0.00132817	0.00926196	16000	Igf1
04213	Longevity regulating pathway - multiple species	8.39548	0.00132817	0.00926196	13688	Eif4ebp2
04213	Longevity regulating pathway - multiple species	8.39548	0.00132817	0.00926196	18708	Pik3r1
04213	Longevity regulating pathway - multiple species	8.39548	0.00132817	0.00926196	15481	Hspa8
04213	Longevity regulating pathway - multiple species	8.39548	0.00132817	0.00926196	11514	Adcy8
05135	Yersinia infection	5.43827	0.00134231	0.00926196	56480	Tbk1
05135	Yersinia infection	5.43827	0.00134231	0.00926196	16797	Lat
05135	Yersinia infection	5.43827	0.00134231	0.00926196	14682	Gnaq
05135	Yersinia infection	5.43827	0.00134231	0.00926196	68524	Wipf2
05135	Yersinia infection	5.43827	0.00134231	0.00926196	26399	Map2k6
05135	Yersinia infection	5.43827	0.00134231	0.00926196	110651	Rps6ka3
05135	Yersinia infection	5.43827	0.00134231	0.00926196	18708	Pik3r1
04740	Olfactory transduction	0.0892065	0.00142872	0.00940602	12789	Cnga2
04623	Cytosolic DNA-sensing pathway	8.26222	0.00143135	0.00940602	230073	Ddx58
04623	Cytosolic DNA-sensing pathway	8.26222	0.00143135	0.00940602	22040	Trex1
04623	Cytosolic DNA-sensing pathway	8.26222	0.00143135	0.00940602	228607	Mavs
04623	Cytosolic DNA-sensing pathway	8.26222	0.00143135	0.00940602	56480	Tbk1
04623	Cytosolic DNA-sensing pathway	8.26222	0.00143135	0.00940602	58203	Zbp1
04550	Signaling pathways regulating pluripotency of stem cells	5.2052	0.00174838	0.0111289	16000	Igf1
04550	Signaling pathways regulating pluripotency of stem cells	5.2052	0.00174838	0.0111289	16880	Lifr
04550	Signaling pathways regulating pluripotency of stem cells	5.2052	0.00174838	0.0111289	69587	Pcgf3
04550	Signaling pathways regulating pluripotency of stem cells	5.2052	0.00174838	0.0111289	12168	Bmpr2
04550	Signaling pathways regulating pluripotency of stem cells	5.2052	0.00174838	0.0111289	16323	Inhba
04550	Signaling pathways regulating pluripotency of stem cells	5.2052	0.00174838	0.0111289	17129	Smad5
04550	Signaling pathways regulating pluripotency of stem cells	5.2052	0.00174838	0.0111289	18708	Pik3r1
04218	Cellular senescence	4.52626	0.00177417	0.0111289	15257	Hipk1
04218	Cellular senescence	4.52626	0.00177417	0.0111289	12444	Ccnd2
04218	Cellular senescence	4.52626	0.00177417	0.0111289	50883	Chek2
04218	Cellular senescence	4.52626	0.00177417	0.0111289	18708	Pik3r1
04218	Cellular senescence	4.52626	0.00177417	0.0111289	630294	Gm7030
04218	Cellular senescence	4.52626	0.00177417	0.0111289	26399	Map2k6
04218	Cellular senescence	4.52626	0.00177417	0.0111289	217708	Lin52
04218	Cellular senescence	4.52626	0.00177417	0.0111289	15574	Hus1
05418	Fluid shear stress and atherosclerosis	4.99129	0.00224696	0.0137813	12168	Bmpr2
05418	Fluid shear stress and atherosclerosis	4.99129	0.00224696	0.0137813	16177	Il1r1
05418	Fluid shear stress and atherosclerosis	4.99129	0.00224696	0.0137813	16416	Itgb3
05418	Fluid shear stress and atherosclerosis	4.99129	0.00224696	0.0137813	22329	Vcam1
05418	Fluid shear stress and atherosclerosis	4.99129	0.00224696	0.0137813	26399	Map2k6
05418	Fluid shear stress and atherosclerosis	4.99129	0.00224696	0.0137813	15516	Hsp90ab1
05418	Fluid shear stress and atherosclerosis	4.99129	0.00224696	0.0137813	18708	Pik3r1
04115	p53 signaling pathway	7.22944	0.00265449	0.0159269	12444	Ccnd2
04115	p53 signaling pathway	7.22944	0.00265449	0.0159269	16000	Igf1
04115	p53 signaling pathway	7.22944	0.00265449	0.0159269	140742	Sesn1
04115	p53 signaling pathway	7.22944	0.00265449	0.0159269	12450	Ccng1
04115	p53 signaling pathway	7.22944	0.00265449	0.0159269	50883	Chek2
00860	Porphyrin and chlorophyll metabolism	9.91467	0.00282884	0.0166119	11655	Alas1
00860	Porphyrin and chlorophyll metabolism	9.91467	0.00282884	0.0166119	226139	Cox15
00860	Porphyrin and chlorophyll metabolism	9.91467	0.00282884	0.0166119	394430	Ugt1a10
00860	Porphyrin and chlorophyll metabolism	9.91467	0.00282884	0.0166119	67417	Ears2
04510	Focal adhesion	4.14344	0.00316543	0.0182012	18595	Pdgfra
04510	Focal adhesion	4.14344	0.00316543	0.0182012	329251	Ppp1r12b
04510	Focal adhesion	4.14344	0.00316543	0.0182012	18708	Pik3r1
04510	Focal adhesion	4.14344	0.00316543	0.0182012	16000	Igf1
04510	Focal adhesion	4.14344	0.00316543	0.0182012	12444	Ccnd2
04510	Focal adhesion	4.14344	0.00316543	0.0182012	226519	Lamc1
04510	Focal adhesion	4.14344	0.00316543	0.0182012	16416	Itgb3
04510	Focal adhesion	4.14344	0.00316543	0.0182012	16774	Lama3
04668	TNF signaling pathway	5.52765	0.00325896	0.0183566	22329	Vcam1
04668	TNF signaling pathway	5.52765	0.00325896	0.0183566	18708	Pik3r1
04668	TNF signaling pathway	5.52765	0.00325896	0.0183566	69601	Dab2ip
04668	TNF signaling pathway	5.52765	0.00325896	0.0183566	16396	Itch
04668	TNF signaling pathway	5.52765	0.00325896	0.0183566	12633	Cflar
04668	TNF signaling pathway	5.52765	0.00325896	0.0183566	26399	Map2k6
04930	Type II diabetes mellitus	8.67533	0.00469929	0.0259401	216233	Socs2
04930	Type II diabetes mellitus	8.67533	0.00469929	0.0259401	12286	Cacna1a
04930	Type II diabetes mellitus	8.67533	0.00469929	0.0259401	67296	Socs4
04930	Type II diabetes mellitus	8.67533	0.00469929	0.0259401	18708	Pik3r1
00510	N-Glycan biosynthesis	8.32832	0.0054785	0.0296483	66789	Alg14
00510	N-Glycan biosynthesis	8.32832	0.0054785	0.0296483	102580	Alg9
00510	N-Glycan biosynthesis	8.32832	0.0054785	0.0296483	53618	Fut8
00510	N-Glycan biosynthesis	8.32832	0.0054785	0.0296483	107895	Mgat5
04540	Gap junction	6.05256	0.00592014	0.0314223	14682	Gnaq
04540	Gap junction	6.05256	0.00592014	0.0314223	14672	Gna11
04540	Gap junction	6.05256	0.00592014	0.0314223	11554	Adrb1
04540	Gap junction	6.05256	0.00592014	0.0314223	18595	Pdgfra
04540	Gap junction	6.05256	0.00592014	0.0314223	11514	Adcy8
00534	Glycosaminoglycan biosynthesis - heparan sulfate / heparin	13.013	0.00614722	0.032012	17423	Ndst2
00534	Glycosaminoglycan biosynthesis - heparan sulfate / heparin	13.013	0.00614722	0.032012	15478	Hs3st3a1
00534	Glycosaminoglycan biosynthesis - heparan sulfate / heparin	13.013	0.00614722	0.032012	54710	Hs3st3b1
00563	Glycosylphosphatidylinositol (GPI)-anchor biosynthesis	12.4925	0.00693587	0.0339209	55981	Pigb
00563	Glycosylphosphatidylinositol (GPI)-anchor biosynthesis	12.4925	0.00693587	0.0339209	78928	Pigt
00563	Glycosylphosphatidylinositol (GPI)-anchor biosynthesis	12.4925	0.00693587	0.0339209	67292	Pigc
04068	FoxO signaling pathway	4.76812	0.00697641	0.0339209	18708	Pik3r1
04068	FoxO signaling pathway	4.76812	0.00697641	0.0339209	12444	Ccnd2
04068	FoxO signaling pathway	4.76812	0.00697641	0.0339209	216439	Agap2
04068	FoxO signaling pathway	4.76812	0.00697641	0.0339209	16000	Igf1
04068	FoxO signaling pathway	4.76812	0.00697641	0.0339209	16197	Il7r
04068	FoxO signaling pathway	4.76812	0.00697641	0.0339209	27401	Skp2
04211	Longevity regulating pathway	5.78355	0.00724071	0.0339209	19016	Pparg
04211	Longevity regulating pathway	5.78355	0.00724071	0.0339209	16000	Igf1
04211	Longevity regulating pathway	5.78355	0.00724071	0.0339209	140742	Sesn1
04211	Longevity regulating pathway	5.78355	0.00724071	0.0339209	11514	Adcy8
04211	Longevity regulating pathway	5.78355	0.00724071	0.0339209	18708	Pik3r1
04612	Antigen processing and presentation	5.78355	0.00724071	0.0339209	15481	Hspa8
04612	Antigen processing and presentation	5.78355	0.00724071	0.0339209	15516	Hsp90ab1
04612	Antigen processing and presentation	5.78355	0.00724071	0.0339209	12010	B2m
04612	Antigen processing and presentation	5.78355	0.00724071	0.0339209	630294	Gm7030
04612	Antigen processing and presentation	5.78355	0.00724071	0.0339209	16641	Klrc1
04914	Progesterone-mediated oocyte maturation	5.78355	0.00724071	0.0339209	15516	Hsp90ab1
04914	Progesterone-mediated oocyte maturation	5.78355	0.00724071	0.0339209	110651	Rps6ka3
04914	Progesterone-mediated oocyte maturation	5.78355	0.00724071	0.0339209	16000	Igf1
04914	Progesterone-mediated oocyte maturation	5.78355	0.00724071	0.0339209	18708	Pik3r1
04914	Progesterone-mediated oocyte maturation	5.78355	0.00724071	0.0339209	11514	Adcy8
05203	Viral carcinogenesis	3.63682	0.00725121	0.0339209	18708	Pik3r1
05203	Viral carcinogenesis	3.63682	0.00725121	0.0339209	12444	Ccnd2
05203	Viral carcinogenesis	3.63682	0.00725121	0.0339209	12774	Ccr5
05203	Viral carcinogenesis	3.63682	0.00725121	0.0339209	630294	Gm7030
05203	Viral carcinogenesis	3.63682	0.00725121	0.0339209	12771	Ccr3
05203	Viral carcinogenesis	3.63682	0.00725121	0.0339209	12773	Ccr4
05203	Viral carcinogenesis	3.63682	0.00725121	0.0339209	19106	Eif2ak2
05203	Viral carcinogenesis	3.63682	0.00725121	0.0339209	27401	Skp2
04915	Estrogen signaling pathway	4.66137	0.00782237	0.0359829	15516	Hsp90ab1
04915	Estrogen signaling pathway	4.66137	0.00782237	0.0359829	15481	Hspa8
04915	Estrogen signaling pathway	4.66137	0.00782237	0.0359829	14682	Gnaq
04915	Estrogen signaling pathway	4.66137	0.00782237	0.0359829	14229	Fkbp5
04915	Estrogen signaling pathway	4.66137	0.00782237	0.0359829	18708	Pik3r1
04915	Estrogen signaling pathway	4.66137	0.00782237	0.0359829	11514	Adcy8
05222	Small cell lung cancer	5.59699	0.00836384	0.0378429	18708	Pik3r1
05222	Small cell lung cancer	5.59699	0.00836384	0.0378429	27401	Skp2
05222	Small cell lung cancer	5.59699	0.00836384	0.0378429	226519	Lamc1
05222	Small cell lung cancer	5.59699	0.00836384	0.0378429	16774	Lama3
05222	Small cell lung cancer	5.59699	0.00836384	0.0378429	20181	Rxra
04910	Insulin signaling pathway	4.4937	0.00940176	0.0417996	18759	Prkci
04910	Insulin signaling pathway	4.4937	0.00940176	0.0417996	19246	Ptpn1
04910	Insulin signaling pathway	4.4937	0.00940176	0.0417996	67296	Socs4
04910	Insulin signaling pathway	4.4937	0.00940176	0.0417996	216233	Socs2
04910	Insulin signaling pathway	4.4937	0.00940176	0.0417996	18708	Pik3r1
04910	Insulin signaling pathway	4.4937	0.00940176	0.0417996	19087	Prkar2a
04020	Calcium signaling pathway	3.47013	0.00969267	0.0417996	11514	Adcy8
04020	Calcium signaling pathway	3.47013	0.00969267	0.0417996	14672	Gna11
04020	Calcium signaling pathway	3.47013	0.00969267	0.0417996	12494	Cd38
04020	Calcium signaling pathway	3.47013	0.00969267	0.0417996	14682	Gnaq
04020	Calcium signaling pathway	3.47013	0.00969267	0.0417996	18439	P2rx7
04020	Calcium signaling pathway	3.47013	0.00969267	0.0417996	11554	Adrb1
04020	Calcium signaling pathway	3.47013	0.00969267	0.0417996	18595	Pdgfra
04020	Calcium signaling pathway	3.47013	0.00969267	0.0417996	12286	Cacna1a
05170	Human immunodeficiency virus 1 infection	3.47013	0.00969267	0.0417996	630294	Gm7030
05170	Human immunodeficiency virus 1 infection	3.47013	0.00969267	0.0417996	18708	Pik3r1
05170	Human immunodeficiency virus 1 infection	3.47013	0.00969267	0.0417996	12774	Ccr5
05170	Human immunodeficiency virus 1 infection	3.47013	0.00969267	0.0417996	14682	Gnaq
05170	Human immunodeficiency virus 1 infection	3.47013	0.00969267	0.0417996	26399	Map2k6
05170	Human immunodeficiency virus 1 infection	3.47013	0.00969267	0.0417996	12010	B2m
05170	Human immunodeficiency virus 1 infection	3.47013	0.00969267	0.0417996	14672	Gna11
05170	Human immunodeficiency virus 1 infection	3.47013	0.00969267	0.0417996	56480	Tbk1
04730	Long-term depression	6.94027	0.0107571	0.0451458	12286	Cacna1a
04730	Long-term depression	6.94027	0.0107571	0.0451458	14672	Gna11
04730	Long-term depression	6.94027	0.0107571	0.0451458	16000	Igf1
04730	Long-term depression	6.94027	0.0107571	0.0451458	14682	Gnaq
04080	Neuroactive ligand-receptor interaction	2.90793	0.0107957	0.0451458	109648	Npy
04080	Neuroactive ligand-receptor interaction	2.90793	0.0107957	0.0451458	74191	P2ry13
04080	Neuroactive ligand-receptor interaction	2.90793	0.0107957	0.0451458	18439	P2rx7
04080	Neuroactive ligand-receptor interaction	2.90793	0.0107957	0.0451458	14063	F2rl1
04080	Neuroactive ligand-receptor interaction	2.90793	0.0107957	0.0451458	67168	Lpar6
04080	Neuroactive ligand-receptor interaction	2.90793	0.0107957	0.0451458	14293	Fpr1
04080	Neuroactive ligand-receptor interaction	2.90793	0.0107957	0.0451458	94226	S1pr5
04080	Neuroactive ligand-receptor interaction	2.90793	0.0107957	0.0451458	14608	Gpr83
04080	Neuroactive ligand-receptor interaction	2.90793	0.0107957	0.0451458	11554	Adrb1
04080	Neuroactive ligand-receptor interaction	2.90793	0.0107957	0.0451458	93742	Pard3
05166	Human T-cell leukemia virus 1 infection	3.37179	0.0115536	0.0475937	630294	Gm7030
05166	Human T-cell leukemia virus 1 infection	3.37179	0.0115536	0.0475937	16185	Il2rb
05166	Human T-cell leukemia virus 1 infection	3.37179	0.0115536	0.0475937	11514	Adcy8
05166	Human T-cell leukemia virus 1 infection	3.37179	0.0115536	0.0475937	16177	Il1r1
05166	Human T-cell leukemia virus 1 infection	3.37179	0.0115536	0.0475937	18708	Pik3r1
05166	Human T-cell leukemia virus 1 infection	3.37179	0.0115536	0.0475937	12444	Ccnd2
05166	Human T-cell leukemia virus 1 infection	3.37179	0.0115536	0.0475937	12010	B2m
05166	Human T-cell leukemia virus 1 infection	3.37179	0.0115536	0.0475937	50883	Chek2
04130	SNARE interactions in vesicular transport	9.464	0.0155432	0.0630872	53334	Gosr1
04130	SNARE interactions in vesicular transport	9.464	0.0155432	0.0630872	67474	Snap29
04130	SNARE interactions in vesicular transport	9.464	0.0155432	0.0630872	20907	Stx1a
04928	Parathyroid hormone synthesis, secretion and action	4.81963	0.0159581	0.0638323	20181	Rxra
04928	Parathyroid hormone synthesis, secretion and action	4.81963	0.0159581	0.0638323	11514	Adcy8
04928	Parathyroid hormone synthesis, secretion and action	4.81963	0.0159581	0.0638323	14672	Gna11
04928	Parathyroid hormone synthesis, secretion and action	4.81963	0.0159581	0.0638323	14682	Gnaq
04928	Parathyroid hormone synthesis, secretion and action	4.81963	0.0159581	0.0638323	16658	Mafb
01040	Biosynthesis of unsaturated fatty acids	9.18565	0.0169269	0.0667403	70025	Acot7
01040	Biosynthesis of unsaturated fatty acids	9.18565	0.0169269	0.0667403	68801	Elovl5
01040	Biosynthesis of unsaturated fatty acids	9.18565	0.0169269	0.0667403	20250	Scd2
04725	Cholinergic synapse	4.6475	0.0186171	0.0719189	14682	Gnaq
04725	Cholinergic synapse	4.6475	0.0186171	0.0719189	12286	Cacna1a
04725	Cholinergic synapse	4.6475	0.0186171	0.0719189	11514	Adcy8
04725	Cholinergic synapse	4.6475	0.0186171	0.0719189	18708	Pik3r1
04725	Cholinergic synapse	4.6475	0.0186171	0.0719189	14672	Gna11
04622	RIG-I-like receptor signaling pathway	5.9488	0.0187615	0.0719189	71586	Ifih1
04622	RIG-I-like receptor signaling pathway	5.9488	0.0187615	0.0719189	230073	Ddx58
04622	RIG-I-like receptor signaling pathway	5.9488	0.0187615	0.0719189	228607	Mavs
04622	RIG-I-like receptor signaling pathway	5.9488	0.0187615	0.0719189	56480	Tbk1
04520	Adherens junction	5.86501	0.0197329	0.0746066	19246	Ptpn1
04520	Adherens junction	5.86501	0.0197329	0.0746066	58235	Nectin1
04520	Adherens junction	5.86501	0.0197329	0.0746066	93742	Pard3
04520	Adherens junction	5.86501	0.0197329	0.0746066	227377	Farp2
04927	Cortisol synthesis and secretion	5.78355	0.0207375	0.0773454	14682	Gnaq
04927	Cortisol synthesis and secretion	5.78355	0.0207375	0.0773454	14672	Gna11
04927	Cortisol synthesis and secretion	5.78355	0.0207375	0.0773454	77037	Mrap
04927	Cortisol synthesis and secretion	5.78355	0.0207375	0.0773454	11514	Adcy8
05216	Thyroid cancer	8.44086	0.0215165	0.0791807	20181	Rxra
05216	Thyroid cancer	8.44086	0.0215165	0.0791807	76551	Ccdc6
05216	Thyroid cancer	8.44086	0.0215165	0.0791807	19016	Pparg
04917	Prolactin signaling pathway	5.62724	0.0228482	0.0829751	12444	Ccnd2
04917	Prolactin signaling pathway	5.62724	0.0228482	0.0829751	67296	Socs4
04917	Prolactin signaling pathway	5.62724	0.0228482	0.0829751	18708	Pik3r1
04917	Prolactin signaling pathway	5.62724	0.0228482	0.0829751	216233	Socs2
04960	Aldosterone-regulated sodium reabsorption	8.21874	0.0231959	0.0831439	65962	Slc9a3r2
04960	Aldosterone-regulated sodium reabsorption	8.21874	0.0231959	0.0831439	16000	Igf1
04960	Aldosterone-regulated sodium reabsorption	8.21874	0.0231959	0.0831439	18708	Pik3r1
05143	African trypanosomiasis	8.008	0.0249517	0.0882907	14682	Gnaq
05143	African trypanosomiasis	8.008	0.0249517	0.0882907	14063	F2rl1
05143	African trypanosomiasis	8.008	0.0249517	0.0882907	22329	Vcam1
00260	Glycine, serine and threonine metabolism	7.8078	0.0267847	0.0924072	14431	Gamt
00260	Glycine, serine and threonine metabolism	7.8078	0.0267847	0.0924072	11655	Alas1
00260	Glycine, serine and threonine metabolism	7.8078	0.0267847	0.0924072	218865	Chdh
00513	Various types of N-glycan biosynthesis	7.8078	0.0267847	0.0924072	66789	Alg14
00513	Various types of N-glycan biosynthesis	7.8078	0.0267847	0.0924072	53618	Fut8
00513	Various types of N-glycan biosynthesis	7.8078	0.0267847	0.0924072	102580	Alg9
04217	Necroptosis	3.58979	0.0279818	0.0953453	142980	Tlr3
04217	Necroptosis	3.58979	0.0279818	0.0953453	12633	Cflar
04217	Necroptosis	3.58979	0.0279818	0.0953453	20847	Stat2
04217	Necroptosis	3.58979	0.0279818	0.0953453	58203	Zbp1
04217	Necroptosis	3.58979	0.0279818	0.0953453	15516	Hsp90ab1
04217	Necroptosis	3.58979	0.0279818	0.0953453	19106	Eif2ak2
04611	Platelet activation	4.19774	0.0284654	0.0954218	18708	Pik3r1
04611	Platelet activation	4.19774	0.0284654	0.0954218	14682	Gnaq
04611	Platelet activation	4.19774	0.0284654	0.0954218	11514	Adcy8
04611	Platelet activation	4.19774	0.0284654	0.0954218	18759	Prkci
04611	Platelet activation	4.19774	0.0284654	0.0954218	16416	Itgb3
03440	Homologous recombination	7.61737	0.0286957	0.0954218	19365	Rad52
03440	Homologous recombination	7.61737	0.0286957	0.0954218	67967	Pold3
03440	Homologous recombination	7.61737	0.0286957	0.0954218	237911	Brip1
00533	Glycosaminoglycan biosynthesis - keratan sulfate	14.872	0.031068	0.102081	53618	Fut8
00533	Glycosaminoglycan biosynthesis - keratan sulfate	14.872	0.031068	0.102081	20442	St3gal1
04142	Lysosome	3.97343	0.0356401	0.115726	83429	Ctns
04142	Lysosome	3.97343	0.0356401	0.115726	72175	Mfsd8
04142	Lysosome	3.97343	0.0356401	0.115726	17775	Laptm4a
04142	Lysosome	3.97343	0.0356401	0.115726	11886	Asah1
04142	Lysosome	3.97343	0.0356401	0.115726	15587	Hyal2
04911	Insulin secretion	4.84205	0.0385484	0.122292	14672	Gna11
04911	Insulin secretion	4.84205	0.0385484	0.122292	11514	Adcy8
04911	Insulin secretion	4.84205	0.0385484	0.122292	14682	Gnaq
04911	Insulin secretion	4.84205	0.0385484	0.122292	20907	Stx1a
04970	Salivary secretion	4.84205	0.0385484	0.122292	11554	Adrb1
04970	Salivary secretion	4.84205	0.0385484	0.122292	14682	Gnaq
04970	Salivary secretion	4.84205	0.0385484	0.122292	11514	Adcy8
04970	Salivary secretion	4.84205	0.0385484	0.122292	12494	Cd38
00230	Purine metabolism	3.82735	0.0414702	0.126485	13178	Dck
00230	Purine metabolism	3.82735	0.0414702	0.126485	12499	Entpd5
00230	Purine metabolism	3.82735	0.0414702	0.126485	11514	Adcy8
00230	Purine metabolism	3.82735	0.0414702	0.126485	18583	Pde7a
00230	Purine metabolism	3.82735	0.0414702	0.126485	18160	Npr1
04210	Apoptosis	3.82735	0.0414702	0.126485	235587	Parp3
04210	Apoptosis	3.82735	0.0414702	0.126485	18708	Pik3r1
04210	Apoptosis	3.82735	0.0414702	0.126485	18646	Prf1
04210	Apoptosis	3.82735	0.0414702	0.126485	69601	Dab2ip
04210	Apoptosis	3.82735	0.0414702	0.126485	12633	Cflar
04512	ECM-receptor interaction	4.732	0.0417034	0.126485	16416	Itgb3
04512	ECM-receptor interaction	4.732	0.0417034	0.126485	226519	Lamc1
04512	ECM-receptor interaction	4.732	0.0417034	0.126485	16774	Lama3
04512	ECM-receptor interaction	4.732	0.0417034	0.126485	231470	Fras1
05235	PD-L1 expression and PD-1 checkpoint pathway in cancer	4.732	0.0417034	0.126485	16797	Lat
05235	PD-L1 expression and PD-1 checkpoint pathway in cancer	4.732	0.0417034	0.126485	26399	Map2k6
05235	PD-L1 expression and PD-1 checkpoint pathway in cancer	4.732	0.0417034	0.126485	18708	Pik3r1
05235	PD-L1 expression and PD-1 checkpoint pathway in cancer	4.732	0.0417034	0.126485	117149	Tirap
04140	Autophagy - animal	3.77188	0.0439746	0.131924	56480	Tbk1
04140	Autophagy - animal	3.77188	0.0439746	0.131924	18708	Pik3r1
04140	Autophagy - animal	3.77188	0.0439746	0.131924	67474	Snap29
04140	Autophagy - animal	3.77188	0.0439746	0.131924	12633	Cflar
04140	Autophagy - animal	3.77188	0.0439746	0.131924	74747	Ddit4
04912	GnRH signaling pathway	4.62684	0.0450207	0.13361	11514	Adcy8
04912	GnRH signaling pathway	4.62684	0.0450207	0.13361	14682	Gnaq
04912	GnRH signaling pathway	4.62684	0.0450207	0.13361	14672	Gna11
04912	GnRH signaling pathway	4.62684	0.0450207	0.13361	26399	Map2k6
04657	IL-17 signaling pathway	4.576	0.0467411	0.13724	50905	Il17rb
04657	IL-17 signaling pathway	4.576	0.0467411	0.13724	16819	Lcn2
04657	IL-17 signaling pathway	4.576	0.0467411	0.13724	15516	Hsp90ab1
04657	IL-17 signaling pathway	4.576	0.0467411	0.13724	56480	Tbk1
02010	ABC transporters	6.24624	0.0495167	0.143859	11303	Abca1
02010	ABC transporters	6.24624	0.0495167	0.143859	11307	Abcg1
02010	ABC transporters	6.24624	0.0495167	0.143859	27416	Abcc5
01522	Endocrine resistance	4.47759	0.0503072	0.144209	18708	Pik3r1
01522	Endocrine resistance	4.47759	0.0503072	0.144209	16000	Igf1
01522	Endocrine resistance	4.47759	0.0503072	0.144209	13388	Dll1
01522	Endocrine resistance	4.47759	0.0503072	0.144209	11514	Adcy8
04270	Vascular smooth muscle contraction	3.64	0.0506822	0.144209	14682	Gnaq
04270	Vascular smooth muscle contraction	3.64	0.0506822	0.144209	18160	Npr1
04270	Vascular smooth muscle contraction	3.64	0.0506822	0.144209	11514	Adcy8
04270	Vascular smooth muscle contraction	3.64	0.0506822	0.144209	14672	Gna11
04270	Vascular smooth muscle contraction	3.64	0.0506822	0.144209	329251	Ppp1r12b
05414	Dilated cardiomyopathy	4.42996	0.0521535	0.145647	11554	Adrb1
05414	Dilated cardiomyopathy	4.42996	0.0521535	0.145647	11514	Adcy8
05414	Dilated cardiomyopathy	4.42996	0.0521535	0.145647	16000	Igf1
05414	Dilated cardiomyopathy	4.42996	0.0521535	0.145647	16416	Itgb3
03460	Fanconi anemia pathway	6.12376	0.0522428	0.145647	74386	Rmi1
03460	Fanconi anemia pathway	6.12376	0.0522428	0.145647	237911	Brip1
03460	Fanconi anemia pathway	6.12376	0.0522428	0.145647	223970	Rmi2
04072	Phospholipase D signaling pathway	3.49342	0.0596048	0.164509	11514	Adcy8
04072	Phospholipase D signaling pathway	3.49342	0.0596048	0.164509	67168	Lpar6
04072	Phospholipase D signaling pathway	3.49342	0.0596048	0.164509	381810	Lpar5
04072	Phospholipase D signaling pathway	3.49342	0.0596048	0.164509	18708	Pik3r1
04072	Phospholipase D signaling pathway	3.49342	0.0596048	0.164509	18595	Pdgfra
05215	Prostate cancer	4.20622	0.0620307	0.16898	18708	Pik3r1
05215	Prostate cancer	4.20622	0.0620307	0.16898	16000	Igf1
05215	Prostate cancer	4.20622	0.0620307	0.16898	18595	Pdgfra
05215	Prostate cancer	4.20622	0.0620307	0.16898	15516	Hsp90ab1
00100	Steroid biosynthesis	10.4104	0.0624492	0.16898	244209	Cyp2r1
00100	Steroid biosynthesis	10.4104	0.0624492	0.16898	20652	Soat1
04921	Oxytocin signaling pathway	3.40209	0.0661029	0.17713	14682	Gnaq
04921	Oxytocin signaling pathway	3.40209	0.0661029	0.17713	12494	Cd38
04921	Oxytocin signaling pathway	3.40209	0.0661029	0.17713	329251	Ppp1r12b
04921	Oxytocin signaling pathway	3.40209	0.0661029	0.17713	18160	Npr1
04921	Oxytocin signaling pathway	3.40209	0.0661029	0.17713	11514	Adcy8
01240	Biosynthesis of cofactors?New!	3.38	0.0677979	0.179925	394430	Ugt1a10
01240	Biosynthesis of cofactors?New!	3.38	0.0677979	0.179925	110119	Mpi
01240	Biosynthesis of cofactors?New!	3.38	0.0677979	0.179925	226139	Cox15
01240	Biosynthesis of cofactors?New!	3.38	0.0677979	0.179925	11655	Alas1
01240	Biosynthesis of cofactors?New!	3.38	0.0677979	0.179925	67417	Ears2
04925	Aldosterone synthesis and secretion	4.08251	0.068484	0.180015	14672	Gna11
04925	Aldosterone synthesis and secretion	4.08251	0.068484	0.180015	18160	Npr1
04925	Aldosterone synthesis and secretion	4.08251	0.068484	0.180015	11514	Adcy8
04925	Aldosterone synthesis and secretion	4.08251	0.068484	0.180015	14682	Gnaq
05144	Malaria	5.47916	0.0703755	0.182144	80782	Klrb1b
05144	Malaria	5.47916	0.0703755	0.182144	17057	Klrb1a
05144	Malaria	5.47916	0.0703755	0.182144	22329	Vcam1
05142	Chagas disease	4.04287	0.0707245	0.182144	14682	Gnaq
05142	Chagas disease	4.04287	0.0707245	0.182144	18708	Pik3r1
05142	Chagas disease	4.04287	0.0707245	0.182144	14672	Gna11
05142	Chagas disease	4.04287	0.0707245	0.182144	12633	Cflar
04150	mTOR signaling pathway	3.33667	0.0712739	0.182144	16000	Igf1
04150	mTOR signaling pathway	3.33667	0.0712739	0.182144	27401	Skp2
04150	mTOR signaling pathway	3.33667	0.0712739	0.182144	74747	Ddit4
04150	mTOR signaling pathway	3.33667	0.0712739	0.182144	110651	Rps6ka3
04150	mTOR signaling pathway	3.33667	0.0712739	0.182144	18708	Pik3r1
04390	Hippo signaling pathway	3.31541	0.0730551	0.183742	217325	Llgl2
04390	Hippo signaling pathway	3.31541	0.0730551	0.183742	18759	Prkci
04390	Hippo signaling pathway	3.31541	0.0730551	0.183742	12444	Ccnd2
04390	Hippo signaling pathway	3.31541	0.0730551	0.183742	12168	Bmpr2
04390	Hippo signaling pathway	3.31541	0.0730551	0.183742	93742	Pard3
04024	cAMP signaling pathway	2.90523	0.0732306	0.183742	18160	Npr1
04024	cAMP signaling pathway	2.90523	0.0732306	0.183742	109648	Npy
04024	cAMP signaling pathway	2.90523	0.0732306	0.183742	12789	Cnga2
04024	cAMP signaling pathway	2.90523	0.0732306	0.183742	18708	Pik3r1
04024	cAMP signaling pathway	2.90523	0.0732306	0.183742	11514	Adcy8
04024	cAMP signaling pathway	2.90523	0.0732306	0.183742	11554	Adrb1
00515	Mannose type O-glycan biosynthesis	9.05252	0.0815972	0.20289	217734	Pomt2
00515	Mannose type O-glycan biosynthesis	9.05252	0.0815972	0.20289	246179	Fktn
05321	Inflammatory bowel disease	5.03729	0.087835	0.216451	16162	Il12rb2
05321	Inflammatory bowel disease	5.03729	0.087835	0.216451	57765	Tbx21
05321	Inflammatory bowel disease	5.03729	0.087835	0.216451	17132	Maf
04929	GnRH secretion	4.95733	0.0915844	0.221731	18708	Pik3r1
04929	GnRH secretion	4.95733	0.0915844	0.221731	14672	Gna11
04929	GnRH secretion	4.95733	0.0915844	0.221731	14682	Gnaq
05332	Graft-versus-host disease	4.95733	0.0915844	0.221731	16641	Klrc1
05332	Graft-versus-host disease	4.95733	0.0915844	0.221731	630294	Gm7030
05332	Graft-versus-host disease	4.95733	0.0915844	0.221731	18646	Prf1
04530	Tight junction	3.11689	0.0924954	0.221989	12394	Runx1
04530	Tight junction	3.11689	0.0924954	0.221989	235442	Rab8b
04530	Tight junction	3.11689	0.0924954	0.221989	217325	Llgl2
04530	Tight junction	3.11689	0.0924954	0.221989	93742	Pard3
04530	Tight junction	3.11689	0.0924954	0.221989	18759	Prkci
05310	Asthma	8.32832	0.095545	0.227331	19074	Prg2
05310	Asthma	8.32832	0.095545	0.227331	13861	Epx
04714	Thermogenesis	2.71576	0.0980077	0.230151	11514	Adcy8
04714	Thermogenesis	2.71576	0.0980077	0.230151	110651	Rps6ka3
04714	Thermogenesis	2.71576	0.0980077	0.230151	19016	Pparg
04714	Thermogenesis	2.71576	0.0980077	0.230151	226139	Cox15
04714	Thermogenesis	2.71576	0.0980077	0.230151	18160	Npr1
04714	Thermogenesis	2.71576	0.0980077	0.230151	214663	Slc25a29
04972	Pancreatic secretion	3.65277	0.098398	0.230151	12494	Cd38
04972	Pancreatic secretion	3.65277	0.098398	0.230151	11514	Adcy8
04972	Pancreatic secretion	3.65277	0.098398	0.230151	80718	Rab27b
04972	Pancreatic secretion	3.65277	0.098398	0.230151	14682	Gnaq
04014	Ras signaling pathway	2.69234	0.101686	0.235842	226525	Rasal2
04014	Ras signaling pathway	2.69234	0.101686	0.235842	18595	Pdgfra
04014	Ras signaling pathway	2.69234	0.101686	0.235842	16000	Igf1
04014	Ras signaling pathway	2.69234	0.101686	0.235842	18708	Pik3r1
04014	Ras signaling pathway	2.69234	0.101686	0.235842	16797	Lat
04014	Ras signaling pathway	2.69234	0.101686	0.235842	56480	Tbk1
04664	Fc epsilon RI signaling pathway	4.732	0.103348	0.237699	18708	Pik3r1
04664	Fc epsilon RI signaling pathway	4.732	0.103348	0.237699	16797	Lat
04664	Fc epsilon RI signaling pathway	4.732	0.103348	0.237699	26399	Map2k6
04022	cGMP-PKG signaling pathway	3.00879	0.105622	0.240922	14672	Gna11
04022	cGMP-PKG signaling pathway	3.00879	0.105622	0.240922	11554	Adrb1
04022	cGMP-PKG signaling pathway	3.00879	0.105622	0.240922	18160	Npr1
04022	cGMP-PKG signaling pathway	3.00879	0.105622	0.240922	11514	Adcy8
04022	cGMP-PKG signaling pathway	3.00879	0.105622	0.240922	14682	Gnaq
04720	Long-term potentiation	4.66137	0.10744	0.242159	11514	Adcy8
04720	Long-term potentiation	4.66137	0.10744	0.242159	14682	Gnaq
04720	Long-term potentiation	4.66137	0.10744	0.242159	110651	Rps6ka3
04514	Cell adhesion molecules	2.99149	0.107919	0.242159	630294	Gm7030
04514	Cell adhesion molecules	2.99149	0.107919	0.242159	22329	Vcam1
04514	Cell adhesion molecules	2.99149	0.107919	0.242159	58235	Nectin1
04514	Cell adhesion molecules	2.99149	0.107919	0.242159	16728	L1cam
04514	Cell adhesion molecules	2.99149	0.107919	0.242159	68481	Mpzl1
05206	MicroRNAs in cancer	2.40504	0.112902	0.251297	74747	Ddit4
05206	MicroRNAs in cancer	2.40504	0.112902	0.251297	18595	Pdgfra
05206	MicroRNAs in cancer	2.40504	0.112902	0.251297	18708	Pik3r1
05206	MicroRNAs in cancer	2.40504	0.112902	0.251297	12444	Ccnd2
05206	MicroRNAs in cancer	2.40504	0.112902	0.251297	12450	Ccng1
05206	MicroRNAs in cancer	2.40504	0.112902	0.251297	16416	Itgb3
05206	MicroRNAs in cancer	2.40504	0.112902	0.251297	12168	Bmpr2
00512	Mucin type O-glycan biosynthesis	7.436	0.118139	0.260603	108150	Galnt7
00512	Mucin type O-glycan biosynthesis	7.436	0.118139	0.260603	20442	St3gal1
04650	Natural killer cell mediated cytotoxicity	3.44145	0.118971	0.260603	18646	Prf1
04650	Natural killer cell mediated cytotoxicity	3.44145	0.118971	0.260603	16641	Klrc1
04650	Natural killer cell mediated cytotoxicity	3.44145	0.118971	0.260603	16797	Lat
04650	Natural killer cell mediated cytotoxicity	3.44145	0.118971	0.260603	18708	Pik3r1
05221	Acute myeloid leukemia	4.4616	0.12023	0.261288	18708	Pik3r1
05221	Acute myeloid leukemia	4.4616	0.12023	0.261288	235320	Zbtb16
05221	Acute myeloid leukemia	4.4616	0.12023	0.261288	12394	Runx1
04110	Cell cycle	3.3855	0.12528	0.269789	12444	Ccnd2
04110	Cell cycle	3.3855	0.12528	0.269789	50883	Chek2
04110	Cell cycle	3.3855	0.12528	0.269789	27401	Skp2
04110	Cell cycle	3.3855	0.12528	0.269789	66671	Ccnh
00062	Fatty acid elongation	7.17959	0.126097	0.269789	70025	Acot7
00062	Fatty acid elongation	7.17959	0.126097	0.269789	68801	Elovl5
04071	Sphingolipid signaling pathway	3.35819	0.128508	0.272171	11886	Asah1
04071	Sphingolipid signaling pathway	3.35819	0.128508	0.272171	14682	Gnaq
04071	Sphingolipid signaling pathway	3.35819	0.128508	0.272171	18708	Pik3r1
04071	Sphingolipid signaling pathway	3.35819	0.128508	0.272171	94226	S1pr5
05218	Melanoma	4.33767	0.129182	0.272171	18595	Pdgfra
05218	Melanoma	4.33767	0.129182	0.272171	18708	Pik3r1
05218	Melanoma	4.33767	0.129182	0.272171	16000	Igf1
04152	AMPK signaling pathway	3.30489	0.135107	0.282497	18708	Pik3r1
04152	AMPK signaling pathway	3.30489	0.135107	0.282497	16000	Igf1
04152	AMPK signaling pathway	3.30489	0.135107	0.282497	20250	Scd2
04152	AMPK signaling pathway	3.30489	0.135107	0.282497	19016	Pparg
05214	Glioma	4.22043	0.138473	0.287358	18595	Pdgfra
05214	Glioma	4.22043	0.138473	0.287358	16000	Igf1
05214	Glioma	4.22043	0.138473	0.287358	18708	Pik3r1
04971	Gastric acid secretion	4.16416	0.143245	0.295041	16517	Kcnj16
04971	Gastric acid secretion	4.16416	0.143245	0.295041	14682	Gnaq
04971	Gastric acid secretion	4.16416	0.143245	0.295041	11514	Adcy8
04924	Renin secretion	4.10937	0.1481	0.300556	18160	Npr1
04924	Renin secretion	4.10937	0.1481	0.300556	11554	Adrb1
04924	Renin secretion	4.10937	0.1481	0.300556	14682	Gnaq
05220	Chronic myeloid leukemia	4.10937	0.1481	0.300556	18708	Pik3r1
05220	Chronic myeloid leukemia	4.10937	0.1481	0.300556	13017	Ctbp2
05220	Chronic myeloid leukemia	4.10937	0.1481	0.300556	12394	Runx1
01521	EGFR tyrosine kinase inhibitor resistance	3.95332	0.163166	0.328713	16000	Igf1
01521	EGFR tyrosine kinase inhibitor resistance	3.95332	0.163166	0.328713	18708	Pik3r1
01521	EGFR tyrosine kinase inhibitor resistance	3.95332	0.163166	0.328713	18595	Pdgfra
04662	B cell receptor signaling pathway	3.8557	0.173622	0.347245	100041146	Gm15448
04662	B cell receptor signaling pathway	3.8557	0.173622	0.347245	18708	Pik3r1
04662	B cell receptor signaling pathway	3.8557	0.173622	0.347245	12902	Cr2
05017	Spinocerebellar ataxia	2.9533	0.190801	0.378856	18708	Pik3r1
05017	Spinocerebellar ataxia	2.9533	0.190801	0.378856	14682	Gnaq
05017	Spinocerebellar ataxia	2.9533	0.190801	0.378856	20238	Atxn1
05017	Spinocerebellar ataxia	2.9533	0.190801	0.378856	12286	Cacna1a
04120	Ubiquitin mediated proteolysis	2.87183	0.207498	0.409068	27401	Skp2
04120	Ubiquitin mediated proteolysis	2.87183	0.207498	0.409068	16396	Itch
04120	Ubiquitin mediated proteolysis	2.87183	0.207498	0.409068	242521	Klhl9
04120	Ubiquitin mediated proteolysis	2.87183	0.207498	0.409068	66799	Ube2w
03320	PPAR signaling pathway	3.50912	0.21868	0.425041	20181	Rxra
03320	PPAR signaling pathway	3.50912	0.21868	0.425041	20250	Scd2
03320	PPAR signaling pathway	3.50912	0.21868	0.425041	19016	Pparg
04727	GABAergic synapse	3.50912	0.21868	0.425041	11514	Adcy8
04727	GABAergic synapse	3.50912	0.21868	0.425041	12286	Cacna1a
04727	GABAergic synapse	3.50912	0.21868	0.425041	227120	Plcl1
00440	Phosphonate and phosphinate metabolism	17.3507	0.22508	0.434421	99712	Cept1
05032	Morphine addiction	3.432	0.230734	0.442241	18583	Pde7a
05032	Morphine addiction	3.432	0.230734	0.442241	11514	Adcy8
05032	Morphine addiction	3.432	0.230734	0.442241	12286	Cacna1a
04742	Taste transduction	3.3947	0.236877	0.450883	11514	Adcy8
04742	Taste transduction	3.3947	0.236877	0.450883	20269	Scn3a
04742	Taste transduction	3.3947	0.236877	0.450883	12286	Cacna1a
04810	Regulation of actin cytoskeleton	2.366	0.249004	0.47072	16416	Itgb3
04810	Regulation of actin cytoskeleton	2.366	0.249004	0.47072	18595	Pdgfra
04810	Regulation of actin cytoskeleton	2.366	0.249004	0.47072	381810	Lpar5
04810	Regulation of actin cytoskeleton	2.366	0.249004	0.47072	329251	Ppp1r12b
04810	Regulation of actin cytoskeleton	2.366	0.249004	0.47072	18708	Pik3r1
04350	TGF-beta signaling pathway	3.28749	0.255761	0.4761	12168	Bmpr2
04350	TGF-beta signaling pathway	3.28749	0.255761	0.4761	16323	Inhba
04350	TGF-beta signaling pathway	3.28749	0.255761	0.4761	17129	Smad5
00514	Other types of O-glycan biosynthesis	4.84205	0.257025	0.4761	108150	Galnt7
00514	Other types of O-glycan biosynthesis	4.84205	0.257025	0.4761	217734	Pomt2
03420	Nucleotide excision repair	4.84205	0.257025	0.4761	67967	Pold3
03420	Nucleotide excision repair	4.84205	0.257025	0.4761	66671	Ccnh
04070	Phosphatidylinositol signaling system	3.25325	0.262206	0.482458	69718	Ipmk
04070	Phosphatidylinositol signaling system	3.25325	0.262206	0.482458	18708	Pik3r1
04070	Phosphatidylinositol signaling system	3.25325	0.262206	0.482458	269180	Inpp4a
00564	Glycerophospholipid metabolism	3.18686	0.275317	0.499917	99712	Cept1
00564	Glycerophospholipid metabolism	3.18686	0.275317	0.499917	99010	Lpcat4
00564	Glycerophospholipid metabolism	3.18686	0.275317	0.499917	75320	Etnk1
05231	Choline metabolism in cancer	3.18686	0.275317	0.499917	68682	Slc44a2
05231	Choline metabolism in cancer	3.18686	0.275317	0.499917	18708	Pik3r1
05231	Choline metabolism in cancer	3.18686	0.275317	0.499917	18595	Pdgfra
04934	Cushing syndrome	2.57047	0.286988	0.517445	14672	Gna11
04934	Cushing syndrome	2.57047	0.286988	0.517445	11514	Adcy8
04934	Cushing syndrome	2.57047	0.286988	0.517445	77037	Mrap
04934	Cushing syndrome	2.57047	0.286988	0.517445	14682	Gnaq
04976	Bile secretion	3.12312	0.288719	0.517445	20181	Rxra
04976	Bile secretion	3.12312	0.288719	0.517445	11514	Adcy8
04976	Bile secretion	3.12312	0.288719	0.517445	394430	Ugt1a10
05016	Huntington disease	2.06829	0.291601	0.519238	14682	Gnaq
05016	Huntington disease	2.06829	0.291601	0.519238	56087	Dnah10
05016	Huntington disease	2.06829	0.291601	0.519238	20907	Stx1a
05016	Huntington disease	2.06829	0.291601	0.519238	59288	Dctn5
05016	Huntington disease	2.06829	0.291601	0.519238	215114	Hip1
05016	Huntington disease	2.06829	0.291601	0.519238	19016	Pparg
05204	Chemical carcinogenesis	3.0922	0.295528	0.522858	394430	Ugt1a10
05204	Chemical carcinogenesis	3.0922	0.295528	0.522858	54486	Hpgds
05204	Chemical carcinogenesis	3.0922	0.295528	0.522858	229905	Kyat3
00565	Ether lipid metabolism	4.33767	0.311297	0.547248	99712	Cept1
00565	Ether lipid metabolism	4.33767	0.311297	0.547248	99010	Lpcat4
00600	Sphingolipid metabolism	4.16416	0.333925	0.583312	11886	Asah1
00600	Sphingolipid metabolism	4.16416	0.333925	0.583312	56386	B4galt6
04340	Hedgehog signaling pathway	4.004	0.357037	0.619763	12444	Ccnd2
04340	Hedgehog signaling pathway	4.004	0.357037	0.619763	117606	Boc
04931	Insulin resistance	2.8392	0.359929	0.620877	18708	Pik3r1
04931	Insulin resistance	2.8392	0.359929	0.620877	110651	Rps6ka3
04931	Insulin resistance	2.8392	0.359929	0.620877	19246	Ptpn1
00330	Arginine and proline metabolism	3.8557	0.380606	0.651821	14431	Gamt
00330	Arginine and proline metabolism	3.8557	0.380606	0.651821	18451	P4ha1
04724	Glutamatergic synapse	2.76382	0.382591	0.651821	12286	Cacna1a
04724	Glutamatergic synapse	2.76382	0.382591	0.651821	14682	Gnaq
04724	Glutamatergic synapse	2.76382	0.382591	0.651821	11514	Adcy8
05152	Tuberculosis	2.31342	0.385601	0.652919	17533	Mrc1
05152	Tuberculosis	2.31342	0.385601	0.652919	16803	Lbp
05152	Tuberculosis	2.31342	0.385601	0.652919	117149	Tirap
05152	Tuberculosis	2.31342	0.385601	0.652919	14131	Fcgr3
05022	Pathways of neurodegeneration - multiple diseases?New!	1.76447	0.392355	0.65826	20907	Stx1a
05022	Pathways of neurodegeneration - multiple diseases?New!	1.76447	0.392355	0.65826	59288	Dctn5
05022	Pathways of neurodegeneration - multiple diseases?New!	1.76447	0.392355	0.65826	14682	Gnaq
05022	Pathways of neurodegeneration - multiple diseases?New!	1.76447	0.392355	0.65826	56480	Tbk1
05022	Pathways of neurodegeneration - multiple diseases?New!	1.76447	0.392355	0.65826	215114	Hip1
05022	Pathways of neurodegeneration - multiple diseases?New!	1.76447	0.392355	0.65826	20238	Atxn1
05022	Pathways of neurodegeneration - multiple diseases?New!	1.76447	0.392355	0.65826	56087	Dnah10
05022	Pathways of neurodegeneration - multiple diseases?New!	1.76447	0.392355	0.65826	26399	Map2k6
05132	Salmonella infection	2.05739	0.393525	0.65826	117149	Tirap
05132	Salmonella infection	2.05739	0.393525	0.65826	15516	Hsp90ab1
05132	Salmonella infection	2.05739	0.393525	0.65826	67068	Dynlrb1
05132	Salmonella infection	2.05739	0.393525	0.65826	26399	Map2k6
05132	Salmonella infection	2.05739	0.393525	0.65826	59288	Dctn5
04145	Phagosome	2.288	0.397426	0.660781	14131	Fcgr3
04145	Phagosome	2.288	0.397426	0.660781	16416	Itgb3
04145	Phagosome	2.288	0.397426	0.660781	630294	Gm7030
04145	Phagosome	2.288	0.397426	0.660781	17533	Mrc1
04670	Leukocyte transendothelial migration	2.64671	0.421611	0.696793	21838	Thy1
04670	Leukocyte transendothelial migration	2.64671	0.421611	0.696793	18708	Pik3r1
04670	Leukocyte transendothelial migration	2.64671	0.421611	0.696793	22329	Vcam1
00240	Pyrimidine metabolism	3.58979	0.429012	0.697461	13178	Dck
00240	Pyrimidine metabolism	3.58979	0.429012	0.697461	12499	Entpd5
04370	VEGF signaling pathway	3.58979	0.429012	0.697461	15507	Hspb1
04370	VEGF signaling pathway	3.58979	0.429012	0.697461	18708	Pik3r1
04114	Oocyte meiosis	2.62447	0.429596	0.697461	110651	Rps6ka3
04114	Oocyte meiosis	2.62447	0.429596	0.697461	16000	Igf1
04114	Oocyte meiosis	2.62447	0.429596	0.697461	11514	Adcy8
00072	Synthesis and degradation of ketone bodies	8.67533	0.437512	0.702259	67041	Oxct1
04919	Thyroid hormone signaling pathway	2.6026	0.437639	0.702259	20181	Rxra
04919	Thyroid hormone signaling pathway	2.6026	0.437639	0.702259	18708	Pik3r1
04919	Thyroid hormone signaling pathway	2.6026	0.437639	0.702259	16416	Itgb3
05020	Prion disease	1.94224	0.470578	0.750749	18708	Pik3r1
05020	Prion disease	1.94224	0.470578	0.750749	226519	Lamc1
05020	Prion disease	1.94224	0.470578	0.750749	15481	Hspa8
05020	Prion disease	1.94224	0.470578	0.750749	20867	Stip1
05020	Prion disease	1.94224	0.470578	0.750749	12274	C6
01212	Fatty acid metabolism	3.35819	0.478947	0.759709	20250	Scd2
01212	Fatty acid metabolism	3.35819	0.478947	0.759709	68801	Elovl5
04913	Ovarian steroidogenesis	3.30489	0.491647	0.770992	11514	Adcy8
04913	Ovarian steroidogenesis	3.30489	0.491647	0.770992	16000	Igf1
05330	Allograft rejection	3.30489	0.491647	0.770992	630294	Gm7030
05330	Allograft rejection	3.30489	0.491647	0.770992	18646	Prf1
04137	Mitophagy - animal	3.15467	0.530224	0.82679	56480	Tbk1
04137	Mitophagy - animal	3.15467	0.530224	0.82679	214952	Rhot2
00604	Glycosphingolipid biosynthesis - ganglio series	6.94027	0.539209	0.835436	20442	St3gal1
04613	Neutrophil extracellular trap formation?New!	2.0313	0.54485	0.835436	16416	Itgb3
04613	Neutrophil extracellular trap formation?New!	2.0313	0.54485	0.835436	14293	Fpr1
04613	Neutrophil extracellular trap formation?New!	2.0313	0.54485	0.835436	170744	Tlr8
04613	Neutrophil extracellular trap formation?New!	2.0313	0.54485	0.835436	18708	Pik3r1
05205	Proteoglycans in cancer	2.0313	0.54485	0.835436	18708	Pik3r1
05205	Proteoglycans in cancer	2.0313	0.54485	0.835436	329251	Ppp1r12b
05205	Proteoglycans in cancer	2.0313	0.54485	0.835436	16000	Igf1
05205	Proteoglycans in cancer	2.0313	0.54485	0.835436	16416	Itgb3
04728	Dopaminergic synapse	2.31342	0.564842	0.861306	11865	Arntl
04728	Dopaminergic synapse	2.31342	0.564842	0.861306	14682	Gnaq
04728	Dopaminergic synapse	2.31342	0.564842	0.861306	12286	Cacna1a
05230	Central carbon metabolism in cancer	3.01751	0.569459	0.863381	18708	Pik3r1
05230	Central carbon metabolism in cancer	3.01751	0.569459	0.863381	18595	Pdgfra
00603	Glycosphingolipid biosynthesis - globo and isoglobo series	6.5065	0.572459	0.863381	20442	St3gal1
04940	Type I diabetes mellitus	2.9744	0.582672	0.874008	18646	Prf1
04940	Type I diabetes mellitus	2.9744	0.582672	0.874008	630294	Gm7030
00982	Drug metabolism - cytochrome P450	2.93251	0.595948	0.884309	54486	Hpgds
00982	Drug metabolism - cytochrome P450	2.93251	0.595948	0.884309	394430	Ugt1a10
04920	Adipocytokine signaling pathway	2.93251	0.595948	0.884309	20181	Rxra
04920	Adipocytokine signaling pathway	2.93251	0.595948	0.884309	109648	Npy
00450	Selenocompound metabolism	6.12376	0.605391	0.885065	229905	Kyat3
00910	Nitrogen metabolism	6.12376	0.605391	0.885065	80733	Car15
00562	Inositol phosphate metabolism	2.89178	0.609284	0.885065	69718	Ipmk
00562	Inositol phosphate metabolism	2.89178	0.609284	0.885065	269180	Inpp4a
05223	Non-small cell lung cancer	2.89178	0.609284	0.885065	18708	Pik3r1
05223	Non-small cell lung cancer	2.89178	0.609284	0.885065	20181	Rxra
00980	Metabolism of xenobiotics by cytochrome P450	2.85216	0.622678	0.899786	54486	Hpgds
00980	Metabolism of xenobiotics by cytochrome P450	2.85216	0.622678	0.899786	394430	Ugt1a10
04918	Thyroid hormone synthesis	2.81362	0.636128	0.912382	11514	Adcy8
04918	Thyroid hormone synthesis	2.81362	0.636128	0.912382	14682	Gnaq
00120	Primary bile acid biosynthesis	5.78355	0.638006	0.912382	56050	Cyp39a1
05224	Breast cancer	2.12457	0.674327	0.957919	18708	Pik3r1
05224	Breast cancer	2.12457	0.674327	0.957919	13388	Dll1
05224	Breast cancer	2.12457	0.674327	0.957919	16000	Igf1
04721	Synaptic vesicle cycle	2.704	0.676791	0.957919	20907	Stx1a
04721	Synaptic vesicle cycle	2.704	0.676791	0.957919	12286	Cacna1a
04723	Retrograde endocannabinoid signaling	2.11022	0.683716	0.962784	11514	Adcy8
04723	Retrograde endocannabinoid signaling	2.11022	0.683716	0.962784	14682	Gnaq
04723	Retrograde endocannabinoid signaling	2.11022	0.683716	0.962784	12286	Cacna1a
05010	Alzheimer disease	1.69275	0.700061	0.971709	19106	Eif2ak2
05010	Alzheimer disease	1.69275	0.700061	0.971709	208117	Aph1b
05010	Alzheimer disease	1.69275	0.700061	0.971709	11816	Apoe
05010	Alzheimer disease	1.69275	0.700061	0.971709	18708	Pik3r1
05010	Alzheimer disease	1.69275	0.700061	0.971709	14682	Gnaq
05010	Alzheimer disease	1.69275	0.700061	0.971709	14608	Gpr83
05014	Amyotrophic lateral sclerosis	1.69275	0.700061	0.971709	59288	Dctn5
05014	Amyotrophic lateral sclerosis	1.69275	0.700061	0.971709	94232	Ubqln4
05014	Amyotrophic lateral sclerosis	1.69275	0.700061	0.971709	56085	Ubqln1
05014	Amyotrophic lateral sclerosis	1.69275	0.700061	0.971709	56480	Tbk1
05014	Amyotrophic lateral sclerosis	1.69275	0.700061	0.971709	56087	Dnah10
05014	Amyotrophic lateral sclerosis	1.69275	0.700061	0.971709	26399	Map2k6
00532	Glycosaminoglycan biosynthesis - chondroitin sulfate / dermatan sulfate	5.2052	0.702301	0.971709	58250	Chst11
05320	Autoimmune thyroid disease	2.63554	0.704137	0.971709	18646	Prf1
05320	Autoimmune thyroid disease	2.63554	0.704137	0.971709	630294	Gm7030
04932	Non-alcoholic fatty liver disease	2.06829	0.712104	0.977815	20181	Rxra
04932	Non-alcoholic fatty liver disease	2.06829	0.712104	0.977815	18708	Pik3r1
04932	Non-alcoholic fatty liver disease	2.06829	0.712104	0.977815	16396	Itch
04261	Adrenergic signaling in cardiomyocytes	2.05468	0.721639	0.986001	11514	Adcy8
04261	Adrenergic signaling in cardiomyocytes	2.05468	0.721639	0.986001	14682	Gnaq
04261	Adrenergic signaling in cardiomyocytes	2.05468	0.721639	0.986001	11554	Adrb1
00531	Glycosaminoglycan degradation	4.95733	0.733987	0.997933	15587	Hyal2
03430	Mismatch repair	4.732	0.765368	1	67967	Pold3
00900	Terpenoid backbone biosynthesis	4.52626	0.796449	1	14593	Ggps1
00590	Arachidonic acid metabolism	2.42102	0.801084	1	56351	Ptges3
00590	Arachidonic acid metabolism	2.42102	0.801084	1	54486	Hpgds
05416	Viral myocarditis	2.366	0.82907	1	18646	Prf1
05416	Viral myocarditis	2.366	0.82907	1	630294	Gm7030
05410	Hypertrophic cardiomyopathy	2.288	0.871234	1	16416	Itgb3
05410	Hypertrophic cardiomyopathy	2.288	0.871234	1	16000	Igf1
04666	Fc gamma R-mediated phagocytosis	2.26313	0.885331	1	18708	Pik3r1
04666	Fc gamma R-mediated phagocytosis	2.26313	0.885331	1	16797	Lat
04610	Complement and coagulation cascades	2.2388	0.899446	1	12902	Cr2
04610	Complement and coagulation cascades	2.2388	0.899446	1	12274	C6
00650	Butanoate metabolism	3.718	0.947435	1	67041	Oxct1
00830	Retinol metabolism	2.14647	0.956056	1	394430	Ugt1a10
00830	Retinol metabolism	2.14647	0.956056	1	19378	Aldh1a2
04713	Circadian entrainment	2.12457	0.970238	1	14682	Gnaq
04713	Circadian entrainment	2.12457	0.970238	1	11514	Adcy8
04916	Melanogenesis	2.08208	0.998627	1	14682	Gnaq
04916	Melanogenesis	2.08208	0.998627	1	11514	Adcy8
01523	Antifolate resistance	3.47013	1	1	27416	Abcc5
04710	Circadian rhythm	3.47013	1	1	11865	Arntl
04933	AGE-RAGE signaling pathway in diabetic complications	2.06147	1	1	22329	Vcam1
04933	AGE-RAGE signaling pathway in diabetic complications	2.06147	1	1	18708	Pik3r1
00053	Ascorbate and aldarate metabolism	3.35819	1	1	394430	Ugt1a10
04660	T cell receptor signaling pathway	2.02144	1	1	18708	Pik3r1
04660	T cell receptor signaling pathway	2.02144	1	1	16797	Lat
00052	Galactose metabolism	3.25325	1	1	319625	Galm
00500	Starch and sucrose metabolism	3.06188	1	1	70974	Pgm2l1
00640	Propanoate metabolism	3.06188	1	1	52665	Echdc1
00040	Pentose and glucuronate interconversions	2.9744	1	1	394430	Ugt1a10
03030	DNA replication	2.9744	1	1	67967	Pold3
04625	C-type lectin receptor signaling pathway	1.859	1	1	20847	Stat2
04625	C-type lectin receptor signaling pathway	1.859	1	1	18708	Pik3r1
00051	Fructose and mannose metabolism	2.89178	1	1	110119	Mpi
05340	Primary immunodeficiency	2.89178	1	1	16197	Il7r
04066	HIF-1 signaling pathway	1.82639	1	1	18708	Pik3r1
04066	HIF-1 signaling pathway	1.82639	1	1	16000	Igf1
05033	Nicotine addiction	2.6026	1	1	12286	Cacna1a
04722	Neurotrophin signaling pathway	1.72073	1	1	18708	Pik3r1
04722	Neurotrophin signaling pathway	1.72073	1	1	110651	Rps6ka3
00760	Nicotinate and nicotinamide metabolism	2.53912	1	1	12494	Cd38
05150	Staphylococcus aureus infection	1.6791	1	1	14293	Fpr1
05150	Staphylococcus aureus infection	1.6791	1	1	14131	Fcgr3
04975	Fat digestion and absorption	2.42102	1	1	11303	Abca1
03022	Basal transcription factors	2.366	1	1	66671	Ccnh
04962	Vasopressin-regulated water reabsorption	2.366	1	1	59288	Dctn5
04926	Relaxin signaling pathway	1.61402	1	1	11514	Adcy8
04926	Relaxin signaling pathway	1.61402	1	1	18708	Pik3r1
04726	Serotonergic synapse	1.58937	1	1	12286	Cacna1a
04726	Serotonergic synapse	1.58937	1	1	14682	Gnaq
04973	Carbohydrate digestion and absorption	2.16883	1	1	18708	Pik3r1
04371	Apelin signaling pathway	1.51977	1	1	11514	Adcy8
04371	Apelin signaling pathway	1.51977	1	1	14682	Gnaq
00520	Amino sugar and nucleotide sugar metabolism	2.08208	1	1	110119	Mpi
00380	Tryptophan metabolism	2.002	1	1	229905	Kyat3
00270	Cysteine and methionine metabolism	1.96423	1	1	229905	Kyat3
00280	Valine, leucine and isoleucine degradation	1.82639	1	1	67041	Oxct1
05213	Endometrial cancer	1.7949	1	1	18708	Pik3r1
04961	Endocrine and other factor-regulated calcium reabsorption	1.70662	1	1	14682	Gnaq
05134	Legionellosis	1.70662	1	1	15481	Hspa8
00310	Lysine degradation	1.62662	1	1	18822	Plod1
00970	Aminoacyl-tRNA biosynthesis	1.57733	1	1	67417	Ears2
00010	Glycolysis / Gluconeogenesis	1.55379	1	1	319625	Galm
05211	Renal cell carcinoma	1.53094	1	1	18708	Pik3r1
05031	Amphetamine addiction	1.50875	1	1	20907	Stx1a
05140	Leishmaniasis	1.4872	1	1	14131	Fcgr3
00480	Glutathione metabolism	1.46625	1	1	54486	Hpgds
05100	Bacterial invasion of epithelial cells	1.36979	1	1	18708	Pik3r1
05212	Pancreatic cancer	1.36979	1	1	18708	Pik3r1
05133	Pertussis	1.352	1	1	117149	Tirap
05412	Arrhythmogenic right ventricular cardiomyopathy	1.352	1	1	16416	Itgb3
01524	Platinum drug resistance	1.3013	1	1	18708	Pik3r1
03018	RNA degradation	1.23933	1	1	70640	Dcp2
04012	ErbB signaling pathway	1.23933	1	1	18708	Pik3r1
04146	Peroxisome	1.21051	1	1	74114	Crot
05210	Colorectal cancer	1.183	1	1	18708	Pik3r1
00140	Steroid hormone biosynthesis	1.13157	1	1	394430	Ugt1a10
00983	Drug metabolism - other enzymes	1.13157	1	1	394430	Ugt1a10
03015	mRNA surveillance pathway	1.02063	1	1	18789	Papola
05322	Systemic lupus erythematosus	1.40681	1	1	12274	C6
05322	Systemic lupus erythematosus	1.40681	1	1	20821	Trim21
05226	Gastric cancer	1.38805	1	1	20181	Rxra
05226	Gastric cancer	1.38805	1	1	18708	Pik3r1
04310	Wnt signaling pathway	1.28523	1	1	12444	Ccnd2
04310	Wnt signaling pathway	1.28523	1	1	13017	Ctbp2
03013	RNA transport	1.144	1	1	13688	Eif4ebp2
03013	RNA transport	1.144	1	1	20595	Smn1
00190	Oxidative phosphorylation	0.782737	1	1	226139	Cox15
03008	Ribosome biogenesis in eukaryotes	0.860364	1	1	216987	Utp6
03040	Spliceosome	0.776895	1	1	15481	Hspa8
04922	Glucagon signaling pathway	1.001	1	1	14682	Gnaq
04974	Protein digestion and absorption	0.963926	1	1	12814	Col11a1
05034	Alcoholism	0.507824	1	1	109648	Npy
05225	Hepatocellular carcinoma	0.598299	1	1	18708	Pik3r1
